# Supplementary material for: Two Separate Clusters of SARS-CoV-2 Delta Variant Infections in a Group of 41 Students Travelling from India: An Illustration of the Need for Rigorous Testing and Quarantine
Source: MDPI journal article supplement (doi:10.3390/v14061198), 2022-05-31
Supplement: s1 [file s1]

## Online supplement

### Legend of Supplementary Figures

**Supplementary Figure 1:** All of the mutations/deletions (compared to Wuhan wild type) that characterize each of the clusters, along with their associated phylogeny.

**Supplementary Figure 2:** Overall SARS-CoV-2 phylogeny, with the sequences from this manuscript highlighted as maroon points.

**Supplementary Table 1: RT-PCR and IgG anti-SARS CoV-2 results (Day 1 = 12/4/2021 (Day of arrival in Belgium))**

| House | PCR                      |                          |                               |                            |                            | Phylogenetic analysis | IgG anti-N (S/CO)      | IgG anti-S (AU/mL)    | Vaccination |
|-------|--------------------------|--------------------------|-------------------------------|----------------------------|----------------------------|-----------------------|------------------------|-----------------------|-------------|
|       | Day 6 -7                 | Day 9-10                 | Day 15                        | Day 18                     | Day 24                     |                       | Day 15                 | Day 15                |             |
| A     | Neg                      | <b>Strong</b><br>Ct 19.9 | <b>Very strong</b><br>Ct 14.2 | <b>Moderate</b><br>Ct 21.9 | <b>Moderate</b><br>Ct 27.9 | Cluster 1             | Neg                    | Neg                   |             |
| A     | Neg                      | <b>Strong</b><br>Ct 17.6 | <b>Moderate</b><br>Ct 23.0    | <i>Weak</i><br>Ct 29.0     | <i>Weak</i><br>Ct 29.4     | Cluster 1             | Neg                    | Neg                   |             |
| A     | Neg                      | <b>Strong</b><br>Ct 18.8 | <b>Strong</b><br>Ct 17.0      | <b>Moderate</b><br>Ct 24.1 | <b>Moderate</b><br>Ct 25.5 | Cluster 1             | Neg                    | Neg                   |             |
| A     | Neg                      | <b>Strong</b><br>Ct 19.4 | <b>Strong</b><br>Ct 18.2      | <b>Moderate</b><br>Ct 25.9 | <b>Moderate</b><br>Ct 27.1 | Cluster 1             | Neg                    | Neg                   |             |
| A     | <b>Strong</b><br>Ct 21.2 | /                        | <i>Weak</i><br>Ct 29.5        | Neg                        | <i>Weak</i><br>Ct 30.6     | Cluster 1             | <b>Positive (1.54)</b> | <b>Positive (423)</b> |             |
| A     | Neg                      | /                        | <b>Strong</b> Ct 17.2         | <b>Strong</b> Ct 18.1      | <b>Moderate</b> Ct 25.5    | Cluster 1             | Neg                    | Neg                   |             |
| A     | Neg                      | /                        | <b>Very strong</b> Ct 14.2    | <b>Moderate</b> Ct 23.6    | <i>Weak</i> Ct 28.5        | Cluster 1             | Neg                    | Neg                   |             |

|      |                               |                          |                               |                            |                            |            |                                   |                                   |                      |
|------|-------------------------------|--------------------------|-------------------------------|----------------------------|----------------------------|------------|-----------------------------------|-----------------------------------|----------------------|
| A    | Neg                           | /                        | <b>Very strong</b><br>Ct 14.1 | <b>Moderate</b><br>Ct 22.9 | <b>Moderate</b><br>Ct 26.3 | Cluster 1  | Neg                               | Neg                               |                      |
| A    | Neg                           | /                        | Neg                           | Neg                        | <i>Weak</i><br>Ct 31.6     | Untypeable | <b>Positive</b><br><b>(2.05)</b>  | <b>Positive</b><br><b>(51769)</b> | <b>2x Pfizer</b>     |
| B    | Neg                           | <b>Strong</b><br>Ct 19.3 | <b>Strong</b><br>Ct 19.1      | <i>Weak</i><br>Ct 29.3     | <i>Weak</i><br>Ct 32.2     | Cluster 2  | Neg                               | Neg                               |                      |
| B    | <b>Strong</b><br>Ct 20.5      | /                        | <b>Moderate</b><br>Ct 26.7    | <i>Weak</i><br>Ct 30.3     | <i>Weak</i><br>Ct 29.9     | Cluster 2  | <b>Grey zone</b><br><b>(0.98)</b> | <b>Positive</b><br><b>(67716)</b> | <b>2x Covishield</b> |
| B    | Neg                           | <b>Strong</b><br>Ct 17.5 | <b>Moderate</b><br>Ct 23.2    | <i>Weak</i><br>Ct 28.7     | <i>Weak</i><br>Ct 30.1     | Cluster 2  | Neg                               | Neg                               |                      |
| B    | Neg                           | <b>Strong</b><br>Ct 18.7 | <b>Strong</b><br>Ct 19.0      | <b>Strong</b><br>Ct 21.0   | <b>Moderate</b><br>Ct 26.2 | Cluster 2  | Neg                               | Neg                               |                      |
| B    | <i>Weak</i><br>Ct 36.3        | /                        | <b>Moderate</b><br>Ct 24.9    | <i>Weak</i><br>Ct 29.6     | <b>Moderate</b><br>Ct 27.0 | Cluster 2  | Neg                               | Neg                               |                      |
| B    | Neg                           | /                        | <b>Very strong</b><br>Ct 13.7 | <b>Strong</b><br>Ct 20.8   | <b>Moderate</b><br>Ct 27.7 | Cluster 2  | Neg                               | <b>Positive</b><br><b>(23055)</b> | <b>2x Pfizer</b>     |
| B    | Neg                           | /                        | <b>Moderate</b><br>Ct 24.0    | <i>Weak</i><br>Ct 33.2     | <i>Weak</i><br>Ct 30.4     | Cluster 2  | Neg                               | Neg                               | <b>1x Pfizer</b>     |
| B    | <i>Weak</i><br>Ct 31.2        | /                        | <b>Strong</b><br>Ct 21.0      | <i>Weak</i><br>Ct 29.0     | <i>Weak</i><br>Ct 33.6     | Cluster 2  | <b>Positive</b><br><b>(4.09)</b>  | <b>Positive</b><br><b>(1762)</b>  |                      |
| B    | Neg                           | /                        | <i>Weak</i><br>Ct 30.1        | Neg                        | Neg                        | Untypeable | Neg                               | Neg                               |                      |
| G=>C | <i>Weak</i><br>Ct 31.6        | /                        | <i>Weak</i><br>Ct 30.4        | <i>Weak</i><br>Ct 31.1     | <i>Weak</i><br>Ct 31.8     | Untypeable | <b>Positive</b><br><b>(5.78)</b>  | <b>Positive</b><br><b>(5588)</b>  |                      |
| C    | <b>Very strong</b><br>Ct 9.9  | /                        | <b>Moderate</b><br>Ct 23.6    | <b>Moderate</b> Ct<br>25.9 | <b>Moderate</b><br>Ct 27.6 | Cluster 2  | <b>Positive</b><br><b>(1.45)</b>  | Neg                               |                      |
| C    | <b>Very strong</b><br>Ct 10.3 | /                        | <b>Moderate</b><br>Ct 23.3    | <b>Moderate</b> Ct<br>26.8 | <i>Weak</i><br>Ct 29.1     | Cluster 2  | <b>Positive</b><br><b>(5.06)</b>  | <b>Positive</b><br><b>(231)</b>   |                      |

|   |                               |     |                            |                            |                            |           |                                  |                                    |                      |
|---|-------------------------------|-----|----------------------------|----------------------------|----------------------------|-----------|----------------------------------|------------------------------------|----------------------|
|   |                               |     |                            |                            |                            |           |                                  |                                    |                      |
| C | <b>Very strong</b><br>Ct 10.1 | /   | <b>Moderate</b><br>Ct 25.3 | <b>Moderate</b><br>Ct 25.0 | <i>Weak</i><br>Ct 29.4     | Cluster 2 | Neg                              | <b>Positive</b><br><b>(100)</b>    |                      |
| C | <b>Strong</b><br>Ct 18.8      | /   | <b>Moderate</b><br>Ct 26.6 | <i>Weak</i><br>Ct 29.9     | <i>Weak</i><br>Ct 30.7     | Cluster 2 | <b>Positive</b><br><b>(4.67)</b> | <b>Positive</b><br><b>(30456)</b>  | <b>2x Covishield</b> |
| D | <b>Moderate</b><br>Ct 22.5    | /   | <b>Moderate</b><br>Ct 21.4 | <b>Strong</b><br>Ct 18.5   | <b>Moderate</b><br>Ct 26.3 | Cluster 2 | Neg                              | Neg                                |                      |
| D | <b>Very strong</b><br>Ct 10.9 | /   | <b>Strong</b><br>Ct 20.8   | <b>Moderate</b><br>Ct 24.7 | <i>Weak</i><br>Ct 29.2     | Cluster 2 | Neg                              | <b>Positive</b><br><b>(179457)</b> | <b>1x Pfizer</b>     |
| D | <b>Very strong</b><br>Ct 9.7  | /   | <b>Moderate</b> Ct<br>21.5 | <b>Moderate</b><br>Ct 25.9 | <b>Moderate</b><br>Ct 27.1 | Cluster 2 | Neg                              | <b>Positive</b><br><b>(123)</b>    |                      |
| D | <b>Very strong</b><br>Ct 10.8 | /   | <b>Moderate</b><br>Ct 24.6 | <b>Moderate</b><br>Ct 25.2 | <b>Moderate</b><br>Ct 27.5 | Cluster 2 | <b>Positive</b><br><b>(1.65)</b> | <b>Positive</b><br><b>(101)</b>    |                      |
| E | Neg                           | /   | Neg                        | Neg                        | /                          |           | Neg                              | Neg                                |                      |
| E | Neg                           | /   | Neg                        | Neg                        | /                          |           | Neg                              | Neg                                |                      |
| E | Neg                           | /   | Neg                        | Neg                        | /                          |           | Neg                              | Neg                                |                      |
| F | Neg                           | Neg | Neg                        | Neg                        | /                          |           | Neg                              | Neg                                |                      |
| F | Neg                           | Neg | Neg                        | Neg                        | /                          |           | Neg                              | <b>Positive</b><br><b>(252)</b>    | <b>1x Pfizer</b>     |
| F | Neg                           | Neg | Neg                        | Neg                        | /                          |           | Neg                              | Neg                                |                      |
| F | Neg                           | Neg | Neg                        | Neg                        | /                          |           | Neg                              | Neg                                |                      |
| G | Neg                           | Neg | Neg                        | Neg                        | /                          |           | Neg                              | Neg                                |                      |
| G | Neg                           | Neg | Neg                        | Neg                        | /                          |           | Neg                              | <b>Positive</b><br><b>(1778)</b>   | <b>2x Covishield</b> |
| G | Neg                           | Neg | Neg                        | Neg                        | /                          |           | Neg                              | Neg                                |                      |
| G | Neg                           | Neg | Neg                        | Neg                        | /                          |           | Neg                              | Neg                                |                      |
| G | Neg                           | Neg | Neg                        | Neg                        | /                          |           | Neg                              | Neg                                |                      |
| H | Neg                           | Neg | Neg                        | Neg                        | /                          |           | Neg                              | Neg                                |                      |

|   |     |     |     |     |   |  |     |                          |  |
|---|-----|-----|-----|-----|---|--|-----|--------------------------|--|
| H | Neg | Neg | Neg | Neg | / |  | Neg | Neg                      |  |
| H | Neg | Neg | Neg | Neg | / |  | Neg | Neg                      |  |
| H | Neg | Neg | Neg | Neg | / |  | Neg | <b>Positive<br/>(53)</b> |  |

*Untypeable: no sequencing possible due to low viral load. Grey italic text: Weak result. Ct: cycle threshold, /: not tested that day.*

**Supplementary Table 2: GISAID acknowledgments (see separate document)**

## **COG-Belgium consortium or COVID-19 Genomics Belgium consortium**

### National Reference Center for Respiratory Pathogens UZ/KU Leuven

Emmanuel André ([emmanuel.andre@uzleuven.be](mailto:emmanuel.andre@uzleuven.be))

Piet Maes ([piet.maes@kuleuven.be](mailto:piet.maes@kuleuven.be))

Guy Baele ([guy.baele@kuleuven.be](mailto:guy.baele@kuleuven.be))

Simon Dellicour ([simon.dellicour@kuleuven.be](mailto:simon.dellicour@kuleuven.be))

Lize Cuypers ([lize.cuypers@uzleuven.be](mailto:lize.cuypers@uzleuven.be))

Marc Van Ranst ([marc.vanranst@uzleuven.be](mailto:marc.vanranst@uzleuven.be))

### Laboratory of Proteomics and Microbiology, UMONS

François E. Dufrasne ([francois.dufrasne2@umons.ac.be](mailto:francois.dufrasne2@umons.ac.be))

Guillaume Bayon-Vicente ([guillaume.bayon-vicente@umons.ac.be](mailto:guillaume.bayon-vicente@umons.ac.be))

Ruddy Wattiez ([ruddy.wattiez@umons.ac.be](mailto:ruddy.wattiez@umons.ac.be))

### AZ Klina

Carl Vael ([carl.vael@klina.be](mailto:carl.vael@klina.be))

Lynsey Berckmans ([lynsey.berckmans@klina.be](mailto:lynsey.berckmans@klina.be))

### Virology Unit, Department of Biomedical Sciences, Institute of Tropical Medicine Antwerp & Department of Biomedical Sciences, University of Antwerp

Philippe Selhorst

Kevin K. Ariën

### Brightcore group

Université libre de Bruxelles (ULB)

Arnaud MARCHANT

Coralie HENIN

Benoit Haerlingen

Ricardo De Mendonca (additional affiliation: Hôpital Erasme)

Institut de Biologie Clinique

Marie-Luce DELFORGE (additional affiliation: Hôpital Erasme)

UZ Brussel

Sonia Van Dooren - [Sonia.VanDooren@uzbrussel.be](mailto:Sonia.VanDooren@uzbrussel.be)

Bruno Hinckel - [Bruno.Hinckel@uzbrussel.be](mailto:Bruno.Hinckel@uzbrussel.be)

Hideo Imamura - [Hideo.Imamura@uzbrussel.be](mailto:Hideo.Imamura@uzbrussel.be)

Toon Janssen - [Toon.Janssen@uzbrussel.be](mailto:Toon.Janssen@uzbrussel.be)

Ben Caljon - [Ben.Caljon@uzbrussel.be](mailto:Ben.Caljon@uzbrussel.be)

Oriane Soetens – [oriane.soetens@uzbrussel.be](mailto:oriane.soetens@uzbrussel.be)

Denis Piérard – [denis.pierard@uzbrussel.be](mailto:denis.pierard@uzbrussel.be)

Thomas Demuyser – [thomas.demuyser@uzbrussel.be](mailto:thomas.demuyser@uzbrussel.be)

LHUB-ULB

Charlotte Martin

UCLouvain

IREC – Medical Microbiology unit (MBLG)

Jean Ruelle [jean.ruelle@uclouvain.be](mailto:jean.ruelle@uclouvain.be)

Benoit Kabamba Mukadi [benoit.kabamba@uclouvain.be](mailto:benoit.kabamba@uclouvain.be) (additional affiliation: Cliniques Universitaires Saint-Luc – Department of clinical laboratories)

Center for Applied Molecular Technologies (CTMA), Institut de Recherche Expérimentale et Clinique (IREC), Université Catholique de Louvain

Professor Jean-Luc Gala MD PhD : [jean-luc.gala@uclouvain.be](mailto:jean-luc.gala@uclouvain.be)

Bertrand Bearzatto PhD : [bertrand.bearzatto@uclouvain.be](mailto:bertrand.bearzatto@uclouvain.be)

Jérôme Ambroise PhD : [jerome.ambroise@uclouvain.be](mailto:jerome.ambroise@uclouvain.be)

GZA/ZNA

Van Lint Philippe [Philippe.VanLint@gza.be](mailto:Philippe.VanLint@gza.be)

Walter Verstrepen, Pharm D, PhD; [walter.verstrepen@zna.be](mailto:walter.verstrepen@zna.be)

Reinout Naesens, MD: [reinout.naesens@zna.be](mailto:reinout.naesens@zna.be)

Sciensano

Michael Peeters

Kate Bakelants

Sarah Denayer

Sofieke Klamer

IPG

|                              |                                                                                    |
|------------------------------|------------------------------------------------------------------------------------|
| Pascale Hilbert, PhD         | <a href="mailto:pascale.hilbert@ipg.be">pascale.hilbert@ipg.be</a>                 |
| Sylvain Brohée, MD           | <a href="mailto:sylvain.brohee@ipg.be">sylvain.brohee@ipg.be</a>                   |
| Pierre-Emmanuel Léonard, MSc | <a href="mailto:pierre-emmanuel.leonard@ipg.be">pierre-emmanuel.leonard@ipg.be</a> |
| Deniz Karadurmus, PhD        | <a href="mailto:deniz.karadurmus@ipg.be">deniz.karadurmus@ipg.be</a>               |
| Jeremie Gras, MD             | <a href="mailto:jeremie.gras@ipg.be">jeremie.gras@ipg.be</a>                       |
| Damien Féret, MSc            | <a href="mailto:damien.feret@ipg.be">damien.feret@ipg.be</a>                       |
| Barbara Lambert MD, PhD      | <a href="mailto:barbara.lambert@ipg.be">barbara.lambert@ipg.be</a>                 |

OLVZ Aalst

Anne Vankeerberghen ([anne.vankeerberghen@olvz-aalst.be](mailto:anne.vankeerberghen@olvz-aalst.be))  
Astrid Holderbeke ([astrid.holderbeke@olvz-aalst.be](mailto:astrid.holderbeke@olvz-aalst.be))  
Hans De Beenhouwer ([hans.de.beenhouwer@olvz-aalst.be](mailto:hans.de.beenhouwer@olvz-aalst.be))  
Lien Cattoir, [lien.cattoir@olvz-aalst.be](mailto:lien.cattoir@olvz-aalst.be)

Department of Microbiology, University Hospital Antwerp, Edegem & Laboratory of Medical Microbiology, Vaccine & Infectious Disease Institute (VAXINFECTIO), University of Antwerp, Wilrijk

Christine Lammens, [christine.lammens@uantwerpen.be](mailto:christine.lammens@uantwerpen.be) (only university affiliation)  
Basil Britto Xavier, [basilbritto.xavier@uantwerpen.be](mailto:basilbritto.xavier@uantwerpen.be) (only university affiliation)  
Marie Le Mercier, [marie.lemercier@uza.be](mailto:marie.lemercier@uza.be) (only hospital affiliation)  
Jasmine Coppens, [jasmine.coppens@uza.be](mailto:jasmine.coppens@uza.be) (only hospital affiliation)  
Veerle Matheeussen, [veerle.matheeussen@uza.be](mailto:veerle.matheeussen@uza.be)  
Herman Goossens, [herman.goossens@uza.be](mailto:herman.goossens@uza.be)

Department of Laboratory Medicine, AZ Delta General Hospital, Roeselare, Belgium

Vanhee Merijn [merijn.vanhee@azdelta.be](mailto:merijn.vanhee@azdelta.be)  
Geert A. Martens [geert.martens@azdelta.be](mailto:geert.martens@azdelta.be)  
Koen Swaerts [koen.swaerts@azdelta.be](mailto:koen.swaerts@azdelta.be)

Frederik Van Hoecke [frederik.vanhoecke@azdelta.be](mailto:frederik.vanhoecke@azdelta.be)

Dieter Desmet [dieter.desmet@azdelta.be](mailto:dieter.desmet@azdelta.be)

Clinical Biology Lab, CHU UCL Namur

BOGAERTS Pierre [pierre.bogaerts@uclouvain.be](mailto:pierre.bogaerts@uclouvain.be)

DEGOSSERIE Jonathan [jonathan.degosserie@uclouvain.be](mailto:jonathan.degosserie@uclouvain.be)

DENIS Olivier [olivier.denis@uclouvain.be](mailto:olivier.denis@uclouvain.be)

HUANG Te-Din [te-din.huang@uclouvain.be](mailto:te-din.huang@uclouvain.be)

Briant network

Imelda

Dagmar Obbels

Hanne Valgaeren

Johan Frans

Annick Smismans

Paul-Emile Claus

AZ St Maarten Mechelen

Truus Goegebuer

Ann Lemmens

AZ Jan Portaels

Bea Van den Poel [Bea.vandenpoel@azjanportaels.be](mailto:Bea.vandenpoel@azjanportaels.be)

Sonja De Bock [sdebock@azjanportaels.be](mailto:sdebock@azjanportaels.be)

Lier

Wim Laffut ([wim.laffut@heilighartlier.be](mailto:wim.laffut@heilighartlier.be))

Ellen Van Even ([ellen.van.even@heilighartlier.be](mailto:ellen.van.even@heilighartlier.be))

AZ St Lucas Gent

Jos Van Acker ([jos.vanacker@azstlucas.be](mailto:jos.vanacker@azstlucas.be))

Charlotte Verfaillie ([charlotte.verfaillie@azstlucas.be](mailto:charlotte.verfaillie@azstlucas.be))

Elke Vanlaere ([elke.vanlaere@azstlucas.be](mailto:elke.vanlaere@azstlucas.be))

Klara De Rauw ([klara.derauw@azstlucas.be](mailto:klara.derauw@azstlucas.be))



Jessa

Brigitte Maes [brigitte.maes@jessazh.be](mailto:brigitte.maes@jessazh.be)

Guy Froyen [guy.froyen@jessazh.be](mailto:guy.froyen@jessazh.be)

Bert Cruys [bert.cruys@jessazh.be](mailto:bert.cruys@jessazh.be)

Ellen Geerdens [ellen.geerdens@jessazh.be](mailto:ellen.geerdens@jessazh.be)

Luc Waumans [luc.waumans@jessazh.be](mailto:luc.waumans@jessazh.be)

Britt Van Meensel [britta.vanmeensel@jessazh.be](mailto:britta.vanmeensel@jessazh.be)

Reinoud Cartuyvels [reinoud.cartuyvels@jessazh.be](mailto:reinoud.cartuyvels@jessazh.be)

Severine Berden [severine.berden@jessazh.be](mailto:severine.berden@jessazh.be)

Marijke Raymaekers [marijke.raymaekers@jessazh.be](mailto:marijke.raymaekers@jessazh.be)

UZ and UGent

[Bruno.verhasselt@uzgent.be](mailto:Bruno.verhasselt@uzgent.be)

CHU and U Liège

Cécile Meex

Keith Durkin

Laurent Gillet

Maria Artesi

Marie-Pierre Hayette

Sébastien Bontems

Vincent Bours

AZ St-Jan Brugge

Jorn Hellemans

Patrick Descheemaeker

Marijke Reynders
