# Supplementary material for: Two Separate Clusters of SARS-CoV-2 Delta Variant Infections in a Group of 41 Students Travelling from India: An Illustration of the Need for Rigorous Testing and Quarantine
Source: MDPI journal article supplement (doi:10.3390/v14061198), 2022-05-31
Supplement: s1 [file s1]

We gratefully acknowledge the following Authors from the Originating laboratories responsible for obtaining the specimens, as well as the Submitting laboratories where the genome data were generated and shared via GISAID, on which this research is based.

All Submitters of data may be contacted directly via [www.gisaid.org](http://www.gisaid.org)

Authors are sorted alphabetically.

| Accession ID                                                                                                                                                                                                                                                                                                                                                                                                                                                                                                                                                                                                                                                                                                                                                                                                                                                                                                                                                                                                                                                                                                                                                                                                                                                                                                                                                                                                                                                                                                                                                                                                                                                                                                                                                                                                                                                                                                                                                                                                                                                                                                                                                                                                | Originating Laboratory                                                                         | Submitting Laboratory                                                                                                                                                                                                                                                                                                                                                                                     | Authors                                                                                                                                                                                                                                                                                                                                                                                                                                              |
|-------------------------------------------------------------------------------------------------------------------------------------------------------------------------------------------------------------------------------------------------------------------------------------------------------------------------------------------------------------------------------------------------------------------------------------------------------------------------------------------------------------------------------------------------------------------------------------------------------------------------------------------------------------------------------------------------------------------------------------------------------------------------------------------------------------------------------------------------------------------------------------------------------------------------------------------------------------------------------------------------------------------------------------------------------------------------------------------------------------------------------------------------------------------------------------------------------------------------------------------------------------------------------------------------------------------------------------------------------------------------------------------------------------------------------------------------------------------------------------------------------------------------------------------------------------------------------------------------------------------------------------------------------------------------------------------------------------------------------------------------------------------------------------------------------------------------------------------------------------------------------------------------------------------------------------------------------------------------------------------------------------------------------------------------------------------------------------------------------------------------------------------------------------------------------------------------------------|------------------------------------------------------------------------------------------------|-----------------------------------------------------------------------------------------------------------------------------------------------------------------------------------------------------------------------------------------------------------------------------------------------------------------------------------------------------------------------------------------------------------|------------------------------------------------------------------------------------------------------------------------------------------------------------------------------------------------------------------------------------------------------------------------------------------------------------------------------------------------------------------------------------------------------------------------------------------------------|
| EPI_ISL_1167086                                                                                                                                                                                                                                                                                                                                                                                                                                                                                                                                                                                                                                                                                                                                                                                                                                                                                                                                                                                                                                                                                                                                                                                                                                                                                                                                                                                                                                                                                                                                                                                                                                                                                                                                                                                                                                                                                                                                                                                                                                                                                                                                                                                             | "Dr. Andrija Stampar" Teaching Institute of Public Health, Department of Clinical Microbiology | Istituto di Genomica Applicata                                                                                                                                                                                                                                                                                                                                                                            | Davide Scaglione; Eleonora Paparelli; Fedrica Cattonaro; Gabriele Magris; Irena Jurman; Jasmina Vranes; Michele Morgante; Slobodanka Radovic; Vera Vendramin                                                                                                                                                                                                                                                                                         |
| EPI_ISL_1394786                                                                                                                                                                                                                                                                                                                                                                                                                                                                                                                                                                                                                                                                                                                                                                                                                                                                                                                                                                                                                                                                                                                                                                                                                                                                                                                                                                                                                                                                                                                                                                                                                                                                                                                                                                                                                                                                                                                                                                                                                                                                                                                                                                                             | "InMedica"                                                                                     | Lithuanian University of Health Sciences Hospital, Department of Genetics and Molecular Medicine                                                                                                                                                                                                                                                                                                          | Astra Vitkauskiene; Darius Cereskevicius; Inga Nasvytiene; Mantas Saraukas; Marius Sukys; Rasa Ugenskiene; Renaldas Jurkevicius; Rima Vainoriene; Zilve Zemeckiene                                                                                                                                                                                                                                                                                   |
| EPI_ISL_2162162                                                                                                                                                                                                                                                                                                                                                                                                                                                                                                                                                                                                                                                                                                                                                                                                                                                                                                                                                                                                                                                                                                                                                                                                                                                                                                                                                                                                                                                                                                                                                                                                                                                                                                                                                                                                                                                                                                                                                                                                                                                                                                                                                                                             | "National Center of Expertise" CSEC MH RK in Almaty city                                       | Reference laboratory for the control of viral infections                                                                                                                                                                                                                                                                                                                                                  | Aidar Ussebayev; Aknur Mutaliyeva; Andrey Komissarov; Artem Fadeev; Azamat Kenessov; Bekzhan Maikotov; Gaukhar Nussupbayeva; Madina Tleubergenova; Maria Pisareva; Nazym Tleumbetova                                                                                                                                                                                                                                                                 |
| EPI_ISL_2162147                                                                                                                                                                                                                                                                                                                                                                                                                                                                                                                                                                                                                                                                                                                                                                                                                                                                                                                                                                                                                                                                                                                                                                                                                                                                                                                                                                                                                                                                                                                                                                                                                                                                                                                                                                                                                                                                                                                                                                                                                                                                                                                                                                                             | "National Center of Expertise" CSEC MH RK in West Kazakhstan Region                            | Reference laboratory for the control of viral infections                                                                                                                                                                                                                                                                                                                                                  | Aidar Ussebayev; Aknur Mutaliyeva; Andrey Komissarov; Artem Fadeev; Azamat Kenessov; Bekzhan Maikotov; Gaukhar Nussupbayeva; Madina Tleubergenova; Maria Pisareva; Nazym Tleumbetova                                                                                                                                                                                                                                                                 |
| EPI_ISL_1495757                                                                                                                                                                                                                                                                                                                                                                                                                                                                                                                                                                                                                                                                                                                                                                                                                                                                                                                                                                                                                                                                                                                                                                                                                                                                                                                                                                                                                                                                                                                                                                                                                                                                                                                                                                                                                                                                                                                                                                                                                                                                                                                                                                                             | 3. Medizinische Abteilung, Hanusch Krankenhaus                                                 | Bergthaler laboratory, CeMM Research Center for Molecular Medicine of the Austrian Academy of Sciences                                                                                                                                                                                                                                                                                                    | Andreas Bergthaler; Anna Schedl; Bekir Erguner; Benedikt Agerer; Christoph Bock; Fabian Amman; Jan Laine; Lukas Endler; Maelle Le Moing; Martin Senekowitsch; Michael Schuster; Petr Triska; Thomas Penz                                                                                                                                                                                                                                             |
| EPI_ISL_1940026, EPI_ISL_1940036                                                                                                                                                                                                                                                                                                                                                                                                                                                                                                                                                                                                                                                                                                                                                                                                                                                                                                                                                                                                                                                                                                                                                                                                                                                                                                                                                                                                                                                                                                                                                                                                                                                                                                                                                                                                                                                                                                                                                                                                                                                                                                                                                                            | A D HALLI                                                                                      | inStem NCBS - INSACOG                                                                                                                                                                                                                                                                                                                                                                                     | Uma Ramakrishnan Dasaradhi Palakodeti Aswin SaiNarain                                                                                                                                                                                                                                                                                                                                                                                                |
| EPI_ISL_2721281, EPI_ISL_2721283                                                                                                                                                                                                                                                                                                                                                                                                                                                                                                                                                                                                                                                                                                                                                                                                                                                                                                                                                                                                                                                                                                                                                                                                                                                                                                                                                                                                                                                                                                                                                                                                                                                                                                                                                                                                                                                                                                                                                                                                                                                                                                                                                                            | A.S.L. CN2                                                                                     | Fondazione del Piemonte per l'Oncologia IRCCS                                                                                                                                                                                                                                                                                                                                                             | Antonino Sottile; Giorgio Giardina; Paola Marino; Silvia Brossa                                                                                                                                                                                                                                                                                                                                                                                      |
| EPI_ISL_2721288                                                                                                                                                                                                                                                                                                                                                                                                                                                                                                                                                                                                                                                                                                                                                                                                                                                                                                                                                                                                                                                                                                                                                                                                                                                                                                                                                                                                                                                                                                                                                                                                                                                                                                                                                                                                                                                                                                                                                                                                                                                                                                                                                                                             | A.S.L. TO4                                                                                     | Fondazione del Piemonte per l'Oncologia IRCCS                                                                                                                                                                                                                                                                                                                                                             | Antonino Sottile; Giorgio Giardina; Paola Marino; Silvia Brossa                                                                                                                                                                                                                                                                                                                                                                                      |
| EPI_ISL_498524, EPI_ISL_498534, EPI_ISL_498547, EPI_ISL_735503, EPI_ISL_1170946, EPI_ISL_1170947, EPI_ISL_1208400, EPI_ISL_1208401, EPI_ISL_1208402, EPI_ISL_1807318                                                                                                                                                                                                                                                                                                                                                                                                                                                                                                                                                                                                                                                                                                                                                                                                                                                                                                                                                                                                                                                                                                                                                                                                                                                                                                                                                                                                                                                                                                                                                                                                                                                                                                                                                                                                                                                                                                                                                                                                                                        |                                                                                                |                                                                                                                                                                                                                                                                                                                                                                                                           |                                                                                                                                                                                                                                                                                                                                                                                                                                                      |
| see above                                                                                                                                                                                                                                                                                                                                                                                                                                                                                                                                                                                                                                                                                                                                                                                                                                                                                                                                                                                                                                                                                                                                                                                                                                                                                                                                                                                                                                                                                                                                                                                                                                                                                                                                                                                                                                                                                                                                                                                                                                                                                                                                                                                                   | ACT Pathology                                                                                  | Schwessinger Lab                                                                                                                                                                                                                                                                                                                                                                                          | Ashley Jones; Benjamin Schwessinger; Craig Kennedy; Karina Kennedy; Kevin Murray; Megan McDonald; Ming-Dao Chia; Robert Lanfear; Robyn N Hall                                                                                                                                                                                                                                                                                                        |
| EPI_ISL_2379356                                                                                                                                                                                                                                                                                                                                                                                                                                                                                                                                                                                                                                                                                                                                                                                                                                                                                                                                                                                                                                                                                                                                                                                                                                                                                                                                                                                                                                                                                                                                                                                                                                                                                                                                                                                                                                                                                                                                                                                                                                                                                                                                                                                             | AD HALLI                                                                                       | INSACOG-KA, NIMHANS                                                                                                                                                                                                                                                                                                                                                                                       | Ananthapadmanabha Kotambail; Anita S Desai; Anson Kunjumon George; Chetan G K; Chitra Pattabiraman; Darshan Sreenivas; Gautham Arunachal Udupi; Pramada Prasad; V Ravi                                                                                                                                                                                                                                                                               |
| EPI_ISL_1940092                                                                                                                                                                                                                                                                                                                                                                                                                                                                                                                                                                                                                                                                                                                                                                                                                                                                                                                                                                                                                                                                                                                                                                                                                                                                                                                                                                                                                                                                                                                                                                                                                                                                                                                                                                                                                                                                                                                                                                                                                                                                                                                                                                                             | AD HALLI                                                                                       | inStem NCBS - INSACOG                                                                                                                                                                                                                                                                                                                                                                                     | Uma Ramakrishnan Dasaradhi Palakodeti Aswin SaiNarain                                                                                                                                                                                                                                                                                                                                                                                                |
| EPI_ISL_2621212                                                                                                                                                                                                                                                                                                                                                                                                                                                                                                                                                                                                                                                                                                                                                                                                                                                                                                                                                                                                                                                                                                                                                                                                                                                                                                                                                                                                                                                                                                                                                                                                                                                                                                                                                                                                                                                                                                                                                                                                                                                                                                                                                                                             | ADILAB                                                                                         | Universidad Nacional de Colombia - Laboratorio Genómico One Health                                                                                                                                                                                                                                                                                                                                        | Andres F. Cardona-Rios; Carlos Franco-Muñoz; Carolina Muñoz-Arango; Celeny Ortiz; Daniel O. Maldonado-Perez; Diego A. Álvarez-Díaz; Hector Alejandro Ruiz-Moreno; Idabely Betancur Ortiz; Jorge E. Osorio; Juan P. Hernandez-Ortiz; Karl A Ciuderis; Katherine Laiton-Donato; Laura Silvana Perez; Lina M. Hurtado; Marcela Mercado-Reyes; Maria Angélica Maya; Maria Stella López; Rita Almanza Payares; Sandra Ines Cano; Simón Villegas Velásquez |
| EPI_ISL_2617039, EPI_ISL_2617048, EPI_ISL_2617056                                                                                                                                                                                                                                                                                                                                                                                                                                                                                                                                                                                                                                                                                                                                                                                                                                                                                                                                                                                                                                                                                                                                                                                                                                                                                                                                                                                                                                                                                                                                                                                                                                                                                                                                                                                                                                                                                                                                                                                                                                                                                                                                                           | AFRICA_CDC - Angola (Ship 12)                                                                  | CERI, Centre for Epidemic Response and Innoavtion, Stellenbosch University and KRISP, KZN Research Innovation and Sequencing Platform, UKZN.                                                                                                                                                                                                                                                              | Afonso P; David K; Emmanuel SJ; Freitas RH; Giandhari J; Ingllés L; Lutucuta S; Miranda J; Morais J; Mufinda M; Naidoo Y; Neto Z; Paulo A Carralero RR Paixão JP; Pereira A; Pillay S; Tegally H; Wilkinson E; de Oliveira T                                                                                                                                                                                                                         |
| EPI_ISL_2379322, EPI_ISL_2379323, EPI_ISL_2379324, EPI_ISL_2379325, EPI_ISL_2379326, EPI_ISL_2379327, EPI_ISL_2379328, EPI_ISL_2379329, EPI_ISL_2379330                                                                                                                                                                                                                                                                                                                                                                                                                                                                                                                                                                                                                                                                                                                                                                                                                                                                                                                                                                                                                                                                                                                                                                                                                                                                                                                                                                                                                                                                                                                                                                                                                                                                                                                                                                                                                                                                                                                                                                                                                                                     |                                                                                                |                                                                                                                                                                                                                                                                                                                                                                                                           |                                                                                                                                                                                                                                                                                                                                                                                                                                                      |
| see above                                                                                                                                                                                                                                                                                                                                                                                                                                                                                                                                                                                                                                                                                                                                                                                                                                                                                                                                                                                                                                                                                                                                                                                                                                                                                                                                                                                                                                                                                                                                                                                                                                                                                                                                                                                                                                                                                                                                                                                                                                                                                                                                                                                                   | AGRAHARA PHC                                                                                   | INSACOG-KA, NIMHANS                                                                                                                                                                                                                                                                                                                                                                                       | Ananthapadmanabha Kotambail; Anita S Desai; Anson Kunjumon George; Chetan G K; Chitra Pattabiraman; Darshan Sreenivas; Gautham Arunachal Udupi; Pramada Prasad; V Ravi                                                                                                                                                                                                                                                                               |
| EPI_ISL_1663507, EPI_ISL_1663516, EPI_ISL_1663522, EPI_ISL_1663523                                                                                                                                                                                                                                                                                                                                                                                                                                                                                                                                                                                                                                                                                                                                                                                                                                                                                                                                                                                                                                                                                                                                                                                                                                                                                                                                                                                                                                                                                                                                                                                                                                                                                                                                                                                                                                                                                                                                                                                                                                                                                                                                          | AIIMS, Patna                                                                                   | Institute of Life Sciences - INSACOG                                                                                                                                                                                                                                                                                                                                                                      | Ajay Parida; Amol M. Kanampalliwar; Arup Ghosh; Atimukta Jha; INSACOG Consortium; Punit Prasad; Rajeeb Swain; Rupesh Dash; Safal Walla; Shifu Aggarwal; Sunil K. Raghav                                                                                                                                                                                                                                                                              |
| EPI_ISL_2231590, EPI_ISL_2231597, EPI_ISL_2231598, EPI_ISL_2231599, EPI_ISL_2231601, EPI_ISL_2231605, EPI_ISL_2231607, EPI_ISL_2231608, EPI_ISL_2231609, EPI_ISL_2231611, EPI_ISL_2231612, EPI_ISL_2231614, EPI_ISL_2231615, EPI_ISL_2231616, EPI_ISL_2231627, EPI_ISL_2231628, EPI_ISL_2231632, EPI_ISL_2231633, EPI_ISL_2231634, EPI_ISL_2231635, EPI_ISL_2231636, EPI_ISL_2231639, EPI_ISL_2231640, EPI_ISL_2231641, EPI_ISL_2231642, EPI_ISL_2231645, EPI_ISL_2231650, EPI_ISL_2231651, EPI_ISL_2231652, EPI_ISL_2231654, EPI_ISL_2231656, EPI_ISL_2231659, EPI_ISL_2231660, EPI_ISL_2231665, EPI_ISL_2231666, EPI_ISL_2231667, EPI_ISL_2231669, EPI_ISL_2231672, EPI_ISL_2231677, EPI_ISL_2231678, EPI_ISL_2231680, EPI_ISL_2231681, EPI_ISL_2231684, EPI_ISL_2231685, EPI_ISL_2231687, EPI_ISL_2231690, EPI_ISL_2231691, EPI_ISL_2231695, EPI_ISL_2231696, EPI_ISL_2231697, EPI_ISL_2231701, EPI_ISL_2231702, EPI_ISL_2231703, EPI_ISL_2231706, EPI_ISL_2231707, EPI_ISL_2231711, EPI_ISL_2231712, EPI_ISL_2231713, EPI_ISL_2231716, EPI_ISL_2231721, EPI_ISL_2231726, EPI_ISL_2231728, EPI_ISL_2231730, EPI_ISL_2231732, EPI_ISL_2231738, EPI_ISL_2231739, EPI_ISL_2231746, EPI_ISL_2231747, EPI_ISL_2231748, EPI_ISL_2231750, EPI_ISL_2231752, EPI_ISL_2231754, EPI_ISL_2231756, EPI_ISL_2231757, EPI_ISL_2231759, EPI_ISL_2231761, EPI_ISL_2231767, EPI_ISL_2231769, EPI_ISL_2231772, EPI_ISL_2231773, EPI_ISL_2231777, EPI_ISL_2231779, EPI_ISL_2231782, EPI_ISL_2231784, EPI_ISL_2231794, EPI_ISL_2231797, EPI_ISL_2231798, EPI_ISL_2231799, EPI_ISL_2231808, EPI_ISL_2231809, EPI_ISL_2231810, EPI_ISL_2231812, EPI_ISL_2231821, EPI_ISL_2231822, EPI_ISL_2231823, EPI_ISL_2231830, EPI_ISL_2231831, EPI_ISL_2231832, EPI_ISL_2231841, EPI_ISL_2231848, EPI_ISL_2231849, EPI_ISL_2231850, EPI_ISL_2231853, EPI_ISL_2231854, EPI_ISL_2231855, EPI_ISL_2231864, EPI_ISL_2231866, EPI_ISL_2231867, EPI_ISL_2231872, EPI_ISL_2323024, EPI_ISL_2373211, EPI_ISL_2373242, EPI_ISL_2441111, EPI_ISL_2441212, EPI_ISL_2660722, EPI_ISL_2774724, EPI_ISL_2774725, EPI_ISL_2774792, EPI_ISL_2775381, EPI_ISL_2775382, EPI_ISL_2775383, EPI_ISL_2775385, EPI_ISL_2775386, EPI_ISL_2775387, EPI_ISL_2775389 |                                                                                                | Amreshwar Vodapalli; Ara Sreenivas; Archana Bharadwaj Siva; B Himasri; Blessy B John; Divya Tej Sowpati; Jandhyala Sai Krishna; Karthik Bharadwaj Tallapaka; Lamuk Zaveri; Onkar Kulkarni; Payel Mukherjee; Priya Nurkurthy; Rakesh K Mishra; Sharath Chandra Thota; Shreekanth Verma; Sofia Banu; Sumedha Avadhanula; Tulasi Nagabandi; Valli Nagalakshmi Undamatla; Vidhyadhari Methuku; Viswagithe S L |                                                                                                                                                                                                                                                                                                                                                                                                                                                      |
| see above                                                                                                                                                                                                                                                                                                                                                                                                                                                                                                                                                                                                                                                                                                                                                                                                                                                                                                                                                                                                                                                                                                                                                                                                                                                                                                                                                                                                                                                                                                                                                                                                                                                                                                                                                                                                                                                                                                                                                                                                                                                                                                                                                                                                   | AP SSO                                                                                         | CSIR-Centre for Cellular and Molecular Biology-INSACOG                                                                                                                                                                                                                                                                                                                                                    | Amreshwar Vodapalli; Ara Sreenivas; Archana Bharadwaj Siva; B Himasri; Blessy B John; Divya Tej Sowpati; Jandhyala Sai Krishna; Karthik Bharadwaj Tallapaka; Lamuk Zaveri; Onkar Kulkarni; Payel Mukherjee; Priya Nurkurthy; Rakesh K Mishra; Sharath Chandra Thota; Shreekanth Verma; Sofia Banu; Sumedha Avadhanula; Tulasi Nagabandi; Valli Nagalakshmi Undamatla; Vidhyadhari Methuku; Viswagithe S L                                            |
| EPI_ISL_682250                                                                                                                                                                                                                                                                                                                                                                                                                                                                                                                                                                                                                                                                                                                                                                                                                                                                                                                                                                                                                                                                                                                                                                                                                                                                                                                                                                                                                                                                                                                                                                                                                                                                                                                                                                                                                                                                                                                                                                                                                                                                                                                                                                                              | AREA DE SALUD ESCAZU (COOPESANA)                                                               | Inciensa, Instituto Costarricense de Investigación y Enseñanza en Nutrición y Salud                                                                                                                                                                                                                                                                                                                       | Adriana Godínez & Melany Calderon; Claudio Soto-Garita; Estela Cordero; Francisco Duarte; Hebleen Porras                                                                                                                                                                                                                                                                                                                                             |
| EPI_ISL_2502736                                                                                                                                                                                                                                                                                                                                                                                                                                                                                                                                                                                                                                                                                                                                                                                                                                                                                                                                                                                                                                                                                                                                                                                                                                                                                                                                                                                                                                                                                                                                                                                                                                                                                                                                                                                                                                                                                                                                                                                                                                                                                                                                                                                             | AREA DE SALUD GUATUSO                                                                          | Inciensa, Instituto Costarricense de Investigación y Enseñanza en NutriciOn y Salud                                                                                                                                                                                                                                                                                                                       | Adriana Godínez; Claudio Soto-Garita; Estela Cordero; Francisco Duarte; Hebleen Porras; Jose Luis Vargas; Joselyn Prado & Francisco ChacOn-Valverde; Mariela Gutierrez; Melany CalderOn                                                                                                                                                                                                                                                              |
| EPI_ISL_1712388                                                                                                                                                                                                                                                                                                                                                                                                                                                                                                                                                                                                                                                                                                                                                                                                                                                                                                                                                                                                                                                                                                                                                                                                                                                                                                                                                                                                                                                                                                                                                                                                                                                                                                                                                                                                                                                                                                                                                                                                                                                                                                                                                                                             | AREA DE SALUD LOS SANTOS                                                                       | Inciensa, Instituto Costarricense de Investigación y Enseñanza en Nutrición y Salud                                                                                                                                                                                                                                                                                                                       | Adriana Godínez; Claudio Soto-Garita; Estela Cordero; Francisco Duarte; Hebleen Porras; Joselyn Prado & Mónica Charpentier-Artavia; José Luis Vargas; Mariela Gutiérrez; Melany Calderón                                                                                                                                                                                                                                                             |
| EPI_ISL_2502732                                                                                                                                                                                                                                                                                                                                                                                                                                                                                                                                                                                                                                                                                                                                                                                                                                                                                                                                                                                                                                                                                                                                                                                                                                                                                                                                                                                                                                                                                                                                                                                                                                                                                                                                                                                                                                                                                                                                                                                                                                                                                                                                                                                             | AREA DE SALUD OREAMUNO-PACAYAS-TIERRA BLANCA                                                   | Inciensa, Instituto Costarricense de Investigación y Enseñanza en NutriciOn y Salud                                                                                                                                                                                                                                                                                                                       | Adriana Godínez; Claudio Soto-Garita; Estela Cordero; Francisco Duarte; Hebleen Porras; Jose Luis Vargas; Joselyn Prado & Carolina Loria-Acosta; Mariela Gutierrez; Melany CalderOn                                                                                                                                                                                                                                                                  |
| EPI_ISL_2502747                                                                                                                                                                                                                                                                                                                                                                                                                                                                                                                                                                                                                                                                                                                                                                                                                                                                                                                                                                                                                                                                                                                                                                                                                                                                                                                                                                                                                                                                                                                                                                                                                                                                                                                                                                                                                                                                                                                                                                                                                                                                                                                                                                                             | AREA DE SALUD PARAISO-CERVANTES                                                                | Inciensa, Instituto Costarricense de Investigación y Enseñanza en NutriciOn y Salud                                                                                                                                                                                                                                                                                                                       | Adriana Godínez; Claudio Soto-Garita; Estela Cordero; Francisco Duarte; Hebleen Porras; Jose Luis Vargas; Mariela Gutierrez & Joselyn Prado; Melany CalderOn                                                                                                                                                                                                                                                                                         |
| EPI_ISL_2103393                                                                                                                                                                                                                                                                                                                                                                                                                                                                                                                                                                                                                                                                                                                                                                                                                                                                                                                                                                                                                                                                                                                                                                                                                                                                                                                                                                                                                                                                                                                                                                                                                                                                                                                                                                                                                                                                                                                                                                                                                                                                                                                                                                                             | AREA DE SALUD PAVAS (COOPESALUD)                                                               | Inciensa, Instituto Costarricense de Investigación y Enseñanza en Nutrición y Salud                                                                                                                                                                                                                                                                                                                       | Adriana Godínez; Caterina Guzmán; Claudio Soto-Garita; Estela Cordero; Francisco Duarte; Hebleen Porras; Joselyn Prado; José Luis Vargas; Mariela Gutiérrez; Melany Calderón; Nazareth Ruiz & Mariel López                                                                                                                                                                                                                                           |
| EPI_ISL_2272993                                                                                                                                                                                                                                                                                                                                                                                                                                                                                                                                                                                                                                                                                                                                                                                                                                                                                                                                                                                                                                                                                                                                                                                                                                                                                                                                                                                                                                                                                                                                                                                                                                                                                                                                                                                                                                                                                                                                                                                                                                                                                                                                                                                             | AREA DE SALUD SANTO DOMINGO                                                                    | Inciensa, Instituto Costarricense de Investigación y Enseñanza en Nutrición y Salud                                                                                                                                                                                                                                                                                                                       | Adriana Godínez; Claudio Soto-Garita; Estela Cordero; Francisco Duarte; Hebleen Porras; Joselyn Prado & Margarita Lee-Lui; José Luis Vargas; Mariela Gutiérrez; Melany Calderón                                                                                                                                                                                                                                                                      |
| EPI_ISL_2502737, EPI_ISL_2502744                                                                                                                                                                                                                                                                                                                                                                                                                                                                                                                                                                                                                                                                                                                                                                                                                                                                                                                                                                                                                                                                                                                                                                                                                                                                                                                                                                                                                                                                                                                                                                                                                                                                                                                                                                                                                                                                                                                                                                                                                                                                                                                                                                            | AREA DE SALUD SIQUIRRRES                                                                       | Inciensa, Instituto Costarricense de Investigación y Enseñanza en NutriciOn y Salud                                                                                                                                                                                                                                                                                                                       | Adriana Godínez; Claudio Soto-Garita; Estela Cordero; Francisco Duarte; Hebleen Porras; Jose Luis Vargas; Joselyn Prado & Ileana Chávés-Peraza; Joselyn Prado & Karla LÓpez; Mariela Gutierrez; Melany CalderOn                                                                                                                                                                                                                                      |
| EPI_ISL_2272958                                                                                                                                                                                                                                                                                                                                                                                                                                                                                                                                                                                                                                                                                                                                                                                                                                                                                                                                                                                                                                                                                                                                                                                                                                                                                                                                                                                                                                                                                                                                                                                                                                                                                                                                                                                                                                                                                                                                                                                                                                                                                                                                                                                             | AREA DE SALUD SIQUIRRRES                                                                       | Inciensa, Instituto Costarricense de Investigación y Enseñanza en Nutrición y Salud                                                                                                                                                                                                                                                                                                                       | Adriana Godínez; Claudio Soto-Garita; Estela Cordero; Francisco Duarte; Hebleen Porras; Joselyn Prado & Ileana Chaves-Peraza; José Luis Vargas; Mariela Gutiérrez; Melany Calderón                                                                                                                                                                                                                                                                   |
| EPI_ISL_1811240                                                                                                                                                                                                                                                                                                                                                                                                                                                                                                                                                                                                                                                                                                                                                                                                                                                                                                                                                                                                                                                                                                                                                                                                                                                                                                                                                                                                                                                                                                                                                                                                                                                                                                                                                                                                                                                                                                                                                                                                                                                                                                                                                                                             | AS Alajuela Central                                                                            | Inciensa, Instituto Costarricense de Investigación y Enseñanza en Nutrición y Salud                                                                                                                                                                                                                                                                                                                       | Pérez-Corrales C & Zuñiga-Carvajal P                                                                                                                                                                                                                                                                                                                                                                                                                 |
| EPI_ISL_1811237                                                                                                                                                                                                                                                                                                                                                                                                                                                                                                                                                                                                                                                                                                                                                                                                                                                                                                                                                                                                                                                                                                                                                                                                                                                                                                                                                                                                                                                                                                                                                                                                                                                                                                                                                                                                                                                                                                                                                                                                                                                                                                                                                                                             | AS Santa Barbara                                                                               | Inciensa, Instituto Costarricense de Investigación y Enseñanza en Nutrición y Salud                                                                                                                                                                                                                                                                                                                       | Pérez-Corrales C & Aguilar-Monge R                                                                                                                                                                                                                                                                                                                                                                                                                   |
| EPI_ISL_2379394                                                                                                                                                                                                                                                                                                                                                                                                                                                                                                                                                                                                                                                                                                                                                                                                                                                                                                                                                                                                                                                                                                                                                                                                                                                                                                                                                                                                                                                                                                                                                                                                                                                                                                                                                                                                                                                                                                                                                                                                                                                                                                                                                                                             | ASHOKPURAM                                                                                     | INSACOG-KA, NIMHANS                                                                                                                                                                                                                                                                                                                                                                                       | Ananthapadmanabha Kotambail; Anita S Desai; Anson Kunjumon George; Chetan G K; Chitra Pattabiraman; Darshan Sreenivas; Gautham Arunachal Udupi; Pramada Prasad; V Ravi                                                                                                                                                                                                                                                                               |
| EPI_ISL_1085197, EPI_ISL_1229737, EPI_ISL_2716552                                                                                                                                                                                                                                                                                                                                                                                                                                                                                                                                                                                                                                                                                                                                                                                                                                                                                                                                                                                                                                                                                                                                                                                                                                                                                                                                                                                                                                                                                                                                                                                                                                                                                                                                                                                                                                                                                                                                                                                                                                                                                                                                                           | ASL Napoli 1 Centro                                                                            | AMES Centro Poldiagnostico Strumentale S.r.l.                                                                                                                                                                                                                                                                                                                                                             | "Giovanni Savarese; Antonella Di Carlo; Antonio Fico"; Eloisa Evangelista; Luigi D'Amore; Luisa Circelli; Maurizio D'Amora; Maurizio D'Amora Antonio Fico"; Monica Ianniello; Nadia Petrillo; Raffaella Ruggiero; Roberto Sirica                                                                                                                                                                                                                     |
| EPI_ISL_2790551                                                                                                                                                                                                                                                                                                                                                                                                                                                                                                                                                                                                                                                                                                                                                                                                                                                                                                                                                                                                                                                                                                                                                                                                                                                                                                                                                                                                                                                                                                                                                                                                                                                                                                                                                                                                                                                                                                                                                                                                                                                                                                                                                                                             | AZ Jan Portaels                                                                                | Imelda Ziekenhuis                                                                                                                                                                                                                                                                                                                                                                                         | Dagmar Obbels; Hanne Valgaeren; Johan Frans                                                                                                                                                                                                                                                                                                                                                                                                          |
| EPI_ISL_2434148, EPI_ISL_2434150, EPI_ISL_2434159, EPI_ISL_2434163, EPI_ISL_2567003, EPI_ISL_2652162, EPI_ISL_2652247                                                                                                                                                                                                                                                                                                                                                                                                                                                                                                                                                                                                                                                                                                                                                                                                                                                                                                                                                                                                                                                                                                                                                                                                                                                                                                                                                                                                                                                                                                                                                                                                                                                                                                                                                                                                                                                                                                                                                                                                                                                                                       |                                                                                                |                                                                                                                                                                                                                                                                                                                                                                                                           |                                                                                                                                                                                                                                                                                                                                                                                                                                                      |
| see above                                                                                                                                                                                                                                                                                                                                                                                                                                                                                                                                                                                                                                                                                                                                                                                                                                                                                                                                                                                                                                                                                                                                                                                                                                                                                                                                                                                                                                                                                                                                                                                                                                                                                                                                                                                                                                                                                                                                                                                                                                                                                                                                                                                                   | AZ Klna                                                                                        | AZ Klna                                                                                                                                                                                                                                                                                                                                                                                                   | Carl Vael - Lynsey Berckmans                                                                                                                                                                                                                                                                                                                                                                                                                         |
| EPI_ISL_2686393                                                                                                                                                                                                                                                                                                                                                                                                                                                                                                                                                                                                                                                                                                                                                                                                                                                                                                                                                                                                                                                                                                                                                                                                                                                                                                                                                                                                                                                                                                                                                                                                                                                                                                                                                                                                                                                                                                                                                                                                                                                                                                                                                                                             | AZ Sint-Jan Brugge-Oostende AV                                                                 | AZ Sint Jan                                                                                                                                                                                                                                                                                                                                                                                               | Jorn Hellemans; Laurien Hoornaert; Marie Madeleine Chabert-Consen; Marijke Reynders; Patrick Descheemaeker; Thomas Van Landschoot                                                                                                                                                                                                                                                                                                                    |
| EPI_ISL_2709603                                                                                                                                                                                                                                                                                                                                                                                                                                                                                                                                                                                                                                                                                                                                                                                                                                                                                                                                                                                                                                                                                                                                                                                                                                                                                                                                                                                                                                                                                                                                                                                                                                                                                                                                                                                                                                                                                                                                                                                                                                                                                                                                                                                             | AZ Sint-Lucas Gent                                                                             | AZ Sint-Lucas Gent                                                                                                                                                                                                                                                                                                                                                                                        | Charlotte Verfaillie; Elke Vanlaere; Jos Van Acker; Klara De Rauw                                                                                                                                                                                                                                                                                                                                                                                    |
| EPI_ISL_1972127, EPI_ISL_1972129                                                                                                                                                                                                                                                                                                                                                                                                                                                                                                                                                                                                                                                                                                                                                                                                                                                                                                                                                                                                                                                                                                                                                                                                                                                                                                                                                                                                                                                                                                                                                                                                                                                                                                                                                                                                                                                                                                                                                                                                                                                                                                                                                                            | AZ Zeno                                                                                        | AZ SINT-JAN BRUGGE                                                                                                                                                                                                                                                                                                                                                                                        | Jorn Hellemans; Laurien Hoornaert; Marijke Reynders; Patrick Descheemaeker; Thomas Van Landschoot                                                                                                                                                                                                                                                                                                                                                    |
| EPI_ISL_2235305                                                                                                                                                                                                                                                                                                                                                                                                                                                                                                                                                                                                                                                                                                                                                                                                                                                                                                                                                                                                                                                                                                                                                                                                                                                                                                                                                                                                                                                                                                                                                                                                                                                                                                                                                                                                                                                                                                                                                                                                                                                                                                                                                                                             | AZ Zeno Knokke-Blankenberge                                                                    | AZ SINT-JAN BRUGGE                                                                                                                                                                                                                                                                                                                                                                                        | Jorn Hellemans; Laurien Hoornaert; Marie Madeleine Chabert-Consen; Marijke Reynders; Patrick Descheemaeker; Thomas Van Landschoot                                                                                                                                                                                                                                                                                                                    |
| EPI_ISL_2376354, EPI_ISL_2725488, EPI_ISL_2725489, EPI_ISL_2725491, EPI_ISL_2725501, EPI_ISL_2725506, EPI_ISL_2725507, EPI_ISL_2725510, EPI_ISL_2727158, EPI_ISL_2727163, EPI_ISL_2727172, EPI_ISL_2727323, EPI_ISL_2790095, EPI_ISL_2790097, EPI_ISL_2790098, EPI_ISL_2790099, EPI_ISL_2790100, EPI_ISL_2790101, EPI_ISL_2790103, EPI_ISL_2790104, EPI_ISL_2790105, EPI_ISL_2790109, EPI_ISL_2790117, EPI_ISL_2790121, EPI_ISL_2790126, EPI_ISL_2790127, EPI_ISL_2790131                                                                                                                                                                                                                                                                                                                                                                                                                                                                                                                                                                                                                                                                                                                                                                                                                                                                                                                                                                                                                                                                                                                                                                                                                                                                                                                                                                                                                                                                                                                                                                                                                                                                                                                                   |                                                                                                |                                                                                                                                                                                                                                                                                                                                                                                                           |                                                                                                                                                                                                                                                                                                                                                                                                                                                      |
| see above                                                                                                                                                                                                                                                                                                                                                                                                                                                                                                                                                                                                                                                                                                                                                                                                                                                                                                                                                                                                                                                                                                                                                                                                                                                                                                                                                                                                                                                                                                                                                                                                                                                                                                                                                                                                                                                                                                                                                                                                                                                                                                                                                                                                   | AZDelta                                                                                        | AZ Delta Medical Laboratories in Roeselare, Belgium                                                                                                                                                                                                                                                                                                                                                       | Dieter De Smet; Geert Martens; Merijn Vanhee; on behalf of AZ Delta COVID-19 Genomics core (member of Genomic surveillance of SARS-CoV-2 in Belgium network)                                                                                                                                                                                                                                                                                         |
| EPI_ISL_1109919, EPI_ISL_1390762                                                                                                                                                                                                                                                                                                                                                                                                                                                                                                                                                                                                                                                                                                                                                                                                                                                                                                                                                                                                                                                                                                                                                                                                                                                                                                                                                                                                                                                                                                                                                                                                                                                                                                                                                                                                                                                                                                                                                                                                                                                                                                                                                                            | AZDelta                                                                                        | AZDelta                                                                                                                                                                                                                                                                                                                                                                                                   | Dieter De Smet; Geert Martens                                                                                                                                                                                                                                                                                                                                                                                                                        |
| EPI_ISL_890187                                                                                                                                                                                                                                                                                                                                                                                                                                                                                                                                                                                                                                                                                                                                                                                                                                                                                                                                                                                                                                                                                                                                                                                                                                                                                                                                                                                                                                                                                                                                                                                                                                                                                                                                                                                                                                                                                                                                                                                                                                                                                                                                                                                              | Academic Hospital of Gadjah Mada University (RSA UGM)                                          | Genetics Working Group (Pokja Genetik) Faculty of Medicine, Public Health and Nursing Universitas Gadjah Mada (FK-KMK UGM); Disease Investigation Center Wates Ministry of Agriculture Indonesia; Department of Microbiology FK-KMK UGM; Laboratorium Diagnostik Yayasan Tahija                                                                                                                           | Afiayahyati; Dwi AA Nugrahaningsih; Edwin W. Daniwijaya; Eggi Arguni; Endah Supriyati; Gunadi; Hendra Wibawa; Kristy Iskandar; Ludhang P. Rizki; Marcellus; Mohamad S. Hakim; Nungki Anggorowati; Siswanto; Titik Nuryastuti; Tri Wibawa; Untung Riawan; William Wilitjijarso                                                                                                                                                                        |

|                                                                                                                                                                                                                                                                                                                                                                                                                                                                                                                                                                                                                                                                                                                                                                                                                                                                                                                                                                                                                                                                                                                                                                                                                                                                                                                                                                                                                                                                                                                                                                                                                                                                                                                                                                                                                                                                                                                                                                                                                                                                                                                                                                                                                                                                                                                                                                                                                                                                                                                                                                                                                                                                                                                                                                                                                                                                                                                                                                                                                                                                                                                                                                                                                                                                                                                                                                                                                                                                                                                                                                                                                                                                                                                                                                                                                                                                                                                                                                                                                                                                                                                                                                                                                                                                                                                                                                                                                                                                                                                                                                                                                                                                                                                                                                                                                                                                                                                                                                                                                                                                                                                                                                                                                                                                                                                                                                                                                                                                                                                                                                                                                                                                                                                                                                                                                                                                                                                                                                                                                                                                                                                                                                                                                                                                                                                                                                                                                                                                                                                                                                                                                                                                                                                                                                                                                                                                                                                                                                                                                                                                                                                                                                                                                                                                                                                                                                                                                                                                                                                                                                                                                                                                                                                                                                                                                                                                                                                                                                                                                                                                                                                                                                                                                                                                                                                                                                                                                                                                                                                                                                                                                                                                                                                                                                                                                                                                                                                                                                                                                                                                                                                                                                                                                                                                                                                                                                                                                                                                                                                                                                                                                                                                                                                                                                                                                                                                                                                                                                                                                                                                                                                                                                                                                                                  |  |                                                                                                                                                                                        |                                                                                                                            |                                                                                                                                                                                                                                                                                                                                                                                                                                                                                                                                                                                                                                                                                                                                                                           |  |
|--------------------------------------------------------------------------------------------------------------------------------------------------------------------------------------------------------------------------------------------------------------------------------------------------------------------------------------------------------------------------------------------------------------------------------------------------------------------------------------------------------------------------------------------------------------------------------------------------------------------------------------------------------------------------------------------------------------------------------------------------------------------------------------------------------------------------------------------------------------------------------------------------------------------------------------------------------------------------------------------------------------------------------------------------------------------------------------------------------------------------------------------------------------------------------------------------------------------------------------------------------------------------------------------------------------------------------------------------------------------------------------------------------------------------------------------------------------------------------------------------------------------------------------------------------------------------------------------------------------------------------------------------------------------------------------------------------------------------------------------------------------------------------------------------------------------------------------------------------------------------------------------------------------------------------------------------------------------------------------------------------------------------------------------------------------------------------------------------------------------------------------------------------------------------------------------------------------------------------------------------------------------------------------------------------------------------------------------------------------------------------------------------------------------------------------------------------------------------------------------------------------------------------------------------------------------------------------------------------------------------------------------------------------------------------------------------------------------------------------------------------------------------------------------------------------------------------------------------------------------------------------------------------------------------------------------------------------------------------------------------------------------------------------------------------------------------------------------------------------------------------------------------------------------------------------------------------------------------------------------------------------------------------------------------------------------------------------------------------------------------------------------------------------------------------------------------------------------------------------------------------------------------------------------------------------------------------------------------------------------------------------------------------------------------------------------------------------------------------------------------------------------------------------------------------------------------------------------------------------------------------------------------------------------------------------------------------------------------------------------------------------------------------------------------------------------------------------------------------------------------------------------------------------------------------------------------------------------------------------------------------------------------------------------------------------------------------------------------------------------------------------------------------------------------------------------------------------------------------------------------------------------------------------------------------------------------------------------------------------------------------------------------------------------------------------------------------------------------------------------------------------------------------------------------------------------------------------------------------------------------------------------------------------------------------------------------------------------------------------------------------------------------------------------------------------------------------------------------------------------------------------------------------------------------------------------------------------------------------------------------------------------------------------------------------------------------------------------------------------------------------------------------------------------------------------------------------------------------------------------------------------------------------------------------------------------------------------------------------------------------------------------------------------------------------------------------------------------------------------------------------------------------------------------------------------------------------------------------------------------------------------------------------------------------------------------------------------------------------------------------------------------------------------------------------------------------------------------------------------------------------------------------------------------------------------------------------------------------------------------------------------------------------------------------------------------------------------------------------------------------------------------------------------------------------------------------------------------------------------------------------------------------------------------------------------------------------------------------------------------------------------------------------------------------------------------------------------------------------------------------------------------------------------------------------------------------------------------------------------------------------------------------------------------------------------------------------------------------------------------------------------------------------------------------------------------------------------------------------------------------------------------------------------------------------------------------------------------------------------------------------------------------------------------------------------------------------------------------------------------------------------------------------------------------------------------------------------------------------------------------------------------------------------------------------------------------------------------------------------------------------------------------------------------------------------------------------------------------------------------------------------------------------------------------------------------------------------------------------------------------------------------------------------------------------------------------------------------------------------------------------------------------------------------------------------------------------------------------------------------------------------------------------------------------------------------------------------------------------------------------------------------------------------------------------------------------------------------------------------------------------------------------------------------------------------------------------------------------------------------------------------------------------------------------------------------------------------------------------------------------------------------------------------------------------------------------------------------------------------------------------------------------------------------------------------------------------------------------------------------------------------------------------------------------------------------------------------------------------------------------------------------------------------------------------------------------------------------------------------------------------------------------------------------------------------------------------------------------------------------------------------------------------------------------------------------------------------------------------------------------------------------------------------------------------------------------------------------------------------------------------------------------------------------------------------------------------------------------------------------------------------------------------------------------------------------------------------------------------------------------------------------------------------------------------------------------------------------------------------------------------------------------------------------------------------------------------------------------------------------------------------------------------------------------------------------------------------------------------------------------------------------------------------------------------------------------------------------------------------------------|--|----------------------------------------------------------------------------------------------------------------------------------------------------------------------------------------|----------------------------------------------------------------------------------------------------------------------------|---------------------------------------------------------------------------------------------------------------------------------------------------------------------------------------------------------------------------------------------------------------------------------------------------------------------------------------------------------------------------------------------------------------------------------------------------------------------------------------------------------------------------------------------------------------------------------------------------------------------------------------------------------------------------------------------------------------------------------------------------------------------------|--|
|                                                                                                                                                                                                                                                                                                                                                                                                                                                                                                                                                                                                                                                                                                                                                                                                                                                                                                                                                                                                                                                                                                                                                                                                                                                                                                                                                                                                                                                                                                                                                                                                                                                                                                                                                                                                                                                                                                                                                                                                                                                                                                                                                                                                                                                                                                                                                                                                                                                                                                                                                                                                                                                                                                                                                                                                                                                                                                                                                                                                                                                                                                                                                                                                                                                                                                                                                                                                                                                                                                                                                                                                                                                                                                                                                                                                                                                                                                                                                                                                                                                                                                                                                                                                                                                                                                                                                                                                                                                                                                                                                                                                                                                                                                                                                                                                                                                                                                                                                                                                                                                                                                                                                                                                                                                                                                                                                                                                                                                                                                                                                                                                                                                                                                                                                                                                                                                                                                                                                                                                                                                                                                                                                                                                                                                                                                                                                                                                                                                                                                                                                                                                                                                                                                                                                                                                                                                                                                                                                                                                                                                                                                                                                                                                                                                                                                                                                                                                                                                                                                                                                                                                                                                                                                                                                                                                                                                                                                                                                                                                                                                                                                                                                                                                                                                                                                                                                                                                                                                                                                                                                                                                                                                                                                                                                                                                                                                                                                                                                                                                                                                                                                                                                                                                                                                                                                                                                                                                                                                                                                                                                                                                                                                                                                                                                                                                                                                                                                                                                                                                                                                                                                                                                                                                                                                  |  | World Mosquito Program (WMP) Yogyakarta Center for Tropical Medicine<br>FK-KMK UGM; Integrated Research center FK-KMK UGM; Department of<br>Computer Science and Electronics FMIPA UGM |                                                                                                                            |                                                                                                                                                                                                                                                                                                                                                                                                                                                                                                                                                                                                                                                                                                                                                                           |  |
| EPI_ISL_2360250,<br>EPI_ISL_2360251                                                                                                                                                                                                                                                                                                                                                                                                                                                                                                                                                                                                                                                                                                                                                                                                                                                                                                                                                                                                                                                                                                                                                                                                                                                                                                                                                                                                                                                                                                                                                                                                                                                                                                                                                                                                                                                                                                                                                                                                                                                                                                                                                                                                                                                                                                                                                                                                                                                                                                                                                                                                                                                                                                                                                                                                                                                                                                                                                                                                                                                                                                                                                                                                                                                                                                                                                                                                                                                                                                                                                                                                                                                                                                                                                                                                                                                                                                                                                                                                                                                                                                                                                                                                                                                                                                                                                                                                                                                                                                                                                                                                                                                                                                                                                                                                                                                                                                                                                                                                                                                                                                                                                                                                                                                                                                                                                                                                                                                                                                                                                                                                                                                                                                                                                                                                                                                                                                                                                                                                                                                                                                                                                                                                                                                                                                                                                                                                                                                                                                                                                                                                                                                                                                                                                                                                                                                                                                                                                                                                                                                                                                                                                                                                                                                                                                                                                                                                                                                                                                                                                                                                                                                                                                                                                                                                                                                                                                                                                                                                                                                                                                                                                                                                                                                                                                                                                                                                                                                                                                                                                                                                                                                                                                                                                                                                                                                                                                                                                                                                                                                                                                                                                                                                                                                                                                                                                                                                                                                                                                                                                                                                                                                                                                                                                                                                                                                                                                                                                                                                                                                                                                                                                                                                              |  | Afzalpoor Hospital                                                                                                                                                                     | National Influenza Center                                                                                                  | A Nejadi; F Ajaminejad and T Mokhtari Azad; J Yavarian; K Sadeghi; N Ghavvami; NZ Shafiei Jandaghi; V Salimi                                                                                                                                                                                                                                                                                                                                                                                                                                                                                                                                                                                                                                                              |  |
| EPI_ISL_2162962,<br>EPI_ISL_2164068,<br>EPI_ISL_2165343,<br>EPI_ISL_2170421,<br>EPI_ISL_2170475,<br>EPI_ISL_2170576                                                                                                                                                                                                                                                                                                                                                                                                                                                                                                                                                                                                                                                                                                                                                                                                                                                                                                                                                                                                                                                                                                                                                                                                                                                                                                                                                                                                                                                                                                                                                                                                                                                                                                                                                                                                                                                                                                                                                                                                                                                                                                                                                                                                                                                                                                                                                                                                                                                                                                                                                                                                                                                                                                                                                                                                                                                                                                                                                                                                                                                                                                                                                                                                                                                                                                                                                                                                                                                                                                                                                                                                                                                                                                                                                                                                                                                                                                                                                                                                                                                                                                                                                                                                                                                                                                                                                                                                                                                                                                                                                                                                                                                                                                                                                                                                                                                                                                                                                                                                                                                                                                                                                                                                                                                                                                                                                                                                                                                                                                                                                                                                                                                                                                                                                                                                                                                                                                                                                                                                                                                                                                                                                                                                                                                                                                                                                                                                                                                                                                                                                                                                                                                                                                                                                                                                                                                                                                                                                                                                                                                                                                                                                                                                                                                                                                                                                                                                                                                                                                                                                                                                                                                                                                                                                                                                                                                                                                                                                                                                                                                                                                                                                                                                                                                                                                                                                                                                                                                                                                                                                                                                                                                                                                                                                                                                                                                                                                                                                                                                                                                                                                                                                                                                                                                                                                                                                                                                                                                                                                                                                                                                                                                                                                                                                                                                                                                                                                                                                                                                                                                                                                                              |  | Alberta Precision Labs (APL)                                                                                                                                                           | Public Health Agency of Canada (PHAC) National Microbiology Laboratory                                                     | Buss; Croxen M; Deo A; Dieu P; E; Ferrato C; Gill K; Khan F; Koleva P; Li V; Lloyd C; Lynch T; Ma R; Murphy S; Pabbaraju K; Shokoples S; Thayer J; Tipples G; Whitehouse M; Wong A; Yu C; Zelyas N                                                                                                                                                                                                                                                                                                                                                                                                                                                                                                                                                                        |  |
| EPI_ISL_2272778, EPI_ISL_2272779, EPI_ISL_2358230, EPI_ISL_2422123, EPI_ISL_2545627, EPI_ISL_2545629, EPI_ISL_2626920, EPI_ISL_2714839, EPI_ISL_2714842, EPI_ISL_2714846                                                                                                                                                                                                                                                                                                                                                                                                                                                                                                                                                                                                                                                                                                                                                                                                                                                                                                                                                                                                                                                                                                                                                                                                                                                                                                                                                                                                                                                                                                                                                                                                                                                                                                                                                                                                                                                                                                                                                                                                                                                                                                                                                                                                                                                                                                                                                                                                                                                                                                                                                                                                                                                                                                                                                                                                                                                                                                                                                                                                                                                                                                                                                                                                                                                                                                                                                                                                                                                                                                                                                                                                                                                                                                                                                                                                                                                                                                                                                                                                                                                                                                                                                                                                                                                                                                                                                                                                                                                                                                                                                                                                                                                                                                                                                                                                                                                                                                                                                                                                                                                                                                                                                                                                                                                                                                                                                                                                                                                                                                                                                                                                                                                                                                                                                                                                                                                                                                                                                                                                                                                                                                                                                                                                                                                                                                                                                                                                                                                                                                                                                                                                                                                                                                                                                                                                                                                                                                                                                                                                                                                                                                                                                                                                                                                                                                                                                                                                                                                                                                                                                                                                                                                                                                                                                                                                                                                                                                                                                                                                                                                                                                                                                                                                                                                                                                                                                                                                                                                                                                                                                                                                                                                                                                                                                                                                                                                                                                                                                                                                                                                                                                                                                                                                                                                                                                                                                                                                                                                                                                                                                                                                                                                                                                                                                                                                                                                                                                                                                                                                                                                                         |  | Algemeen Medisch Labo                                                                                                                                                                  | Labo Klinische Biologie, UZA                                                                                               | Basil Britto Xavier; Christine Lammens; Herman Goossens; Ines Verbesselt; Jasmine Coppens; Kathleen Holemans; Marie Le Mercier; Veele Mathaeusessen                                                                                                                                                                                                                                                                                                                                                                                                                                                                                                                                                                                                                       |  |
| EPI_ISL_2100679, EPI_ISL_2100680, EPI_ISL_2100681, EPI_ISL_2100682, EPI_ISL_2100687, EPI_ISL_2100688, EPI_ISL_2100689, EPI_ISL_2100690, EPI_ISL_2100691, EPI_ISL_2100692, EPI_ISL_2100694, EPI_ISL_2100696, EPI_ISL_2100699, EPI_ISL_2105583, EPI_ISL_2105584, EPI_ISL_2105585                                                                                                                                                                                                                                                                                                                                                                                                                                                                                                                                                                                                                                                                                                                                                                                                                                                                                                                                                                                                                                                                                                                                                                                                                                                                                                                                                                                                                                                                                                                                                                                                                                                                                                                                                                                                                                                                                                                                                                                                                                                                                                                                                                                                                                                                                                                                                                                                                                                                                                                                                                                                                                                                                                                                                                                                                                                                                                                                                                                                                                                                                                                                                                                                                                                                                                                                                                                                                                                                                                                                                                                                                                                                                                                                                                                                                                                                                                                                                                                                                                                                                                                                                                                                                                                                                                                                                                                                                                                                                                                                                                                                                                                                                                                                                                                                                                                                                                                                                                                                                                                                                                                                                                                                                                                                                                                                                                                                                                                                                                                                                                                                                                                                                                                                                                                                                                                                                                                                                                                                                                                                                                                                                                                                                                                                                                                                                                                                                                                                                                                                                                                                                                                                                                                                                                                                                                                                                                                                                                                                                                                                                                                                                                                                                                                                                                                                                                                                                                                                                                                                                                                                                                                                                                                                                                                                                                                                                                                                                                                                                                                                                                                                                                                                                                                                                                                                                                                                                                                                                                                                                                                                                                                                                                                                                                                                                                                                                                                                                                                                                                                                                                                                                                                                                                                                                                                                                                                                                                                                                                                                                                                                                                                                                                                                                                                                                                                                                                                                                                   |  | see above                                                                                                                                                                              | Algenem Medisch Labo                                                                                                       | see above                                                                                                                                                                                                                                                                                                                                                                                                                                                                                                                                                                                                                                                                                                                                                                 |  |
| EPI_ISL_2272778, EPI_ISL_2272779, EPI_ISL_2358230, EPI_ISL_2422123, EPI_ISL_2545627, EPI_ISL_2545629, EPI_ISL_2626920, EPI_ISL_2714839, EPI_ISL_2714842, EPI_ISL_2714846                                                                                                                                                                                                                                                                                                                                                                                                                                                                                                                                                                                                                                                                                                                                                                                                                                                                                                                                                                                                                                                                                                                                                                                                                                                                                                                                                                                                                                                                                                                                                                                                                                                                                                                                                                                                                                                                                                                                                                                                                                                                                                                                                                                                                                                                                                                                                                                                                                                                                                                                                                                                                                                                                                                                                                                                                                                                                                                                                                                                                                                                                                                                                                                                                                                                                                                                                                                                                                                                                                                                                                                                                                                                                                                                                                                                                                                                                                                                                                                                                                                                                                                                                                                                                                                                                                                                                                                                                                                                                                                                                                                                                                                                                                                                                                                                                                                                                                                                                                                                                                                                                                                                                                                                                                                                                                                                                                                                                                                                                                                                                                                                                                                                                                                                                                                                                                                                                                                                                                                                                                                                                                                                                                                                                                                                                                                                                                                                                                                                                                                                                                                                                                                                                                                                                                                                                                                                                                                                                                                                                                                                                                                                                                                                                                                                                                                                                                                                                                                                                                                                                                                                                                                                                                                                                                                                                                                                                                                                                                                                                                                                                                                                                                                                                                                                                                                                                                                                                                                                                                                                                                                                                                                                                                                                                                                                                                                                                                                                                                                                                                                                                                                                                                                                                                                                                                                                                                                                                                                                                                                                                                                                                                                                                                                                                                                                                                                                                                                                                                                                                                                                         |  | see above                                                                                                                                                                              | All India Institute of Medical Sciences, Ansari Nagar Delhi                                                                | CSIR-Institute of Genomics and Integrative Biology<br>Animesh Ray; Asangala Kamal; Ashwin Varadarajan; Ayush Goel; Bharathram Uppliri*; Devassish Desai; Manish Kumar; Mohammed Ahmed; Mohammed Faruq; Naveet Wig; Pooja Sharma*; Rajesh Pandey; Sarafaraz Alam; Saruchi Wadhwa; Satish Swain; Sheeba Salifi; Sushma Rajpoot; Umang Arora                                                                                                                                                                                                                                                                                                                                                                                                                                 |  |
| EPI_ISL_2426190, EPI_ISL_2426191, EPI_ISL_2426192, EPI_ISL_2426205, EPI_ISL_2426206, EPI_ISL_2426210, EPI_ISL_2426214, EPI_ISL_2426216, EPI_ISL_2426217, EPI_ISL_2426222, EPI_ISL_2426223, EPI_ISL_2426224, EPI_ISL_2426226, EPI_ISL_2426227, EPI_ISL_2426230, EPI_ISL_2426231, EPI_ISL_2426232, EPI_ISL_2426234, EPI_ISL_2426235, EPI_ISL_2426239, EPI_ISL_2426242, EPI_ISL_2426243, EPI_ISL_2426245, EPI_ISL_2426248, EPI_ISL_2426249, EPI_ISL_2426251, EPI_ISL_2426252                                                                                                                                                                                                                                                                                                                                                                                                                                                                                                                                                                                                                                                                                                                                                                                                                                                                                                                                                                                                                                                                                                                                                                                                                                                                                                                                                                                                                                                                                                                                                                                                                                                                                                                                                                                                                                                                                                                                                                                                                                                                                                                                                                                                                                                                                                                                                                                                                                                                                                                                                                                                                                                                                                                                                                                                                                                                                                                                                                                                                                                                                                                                                                                                                                                                                                                                                                                                                                                                                                                                                                                                                                                                                                                                                                                                                                                                                                                                                                                                                                                                                                                                                                                                                                                                                                                                                                                                                                                                                                                                                                                                                                                                                                                                                                                                                                                                                                                                                                                                                                                                                                                                                                                                                                                                                                                                                                                                                                                                                                                                                                                                                                                                                                                                                                                                                                                                                                                                                                                                                                                                                                                                                                                                                                                                                                                                                                                                                                                                                                                                                                                                                                                                                                                                                                                                                                                                                                                                                                                                                                                                                                                                                                                                                                                                                                                                                                                                                                                                                                                                                                                                                                                                                                                                                                                                                                                                                                                                                                                                                                                                                                                                                                                                                                                                                                                                                                                                                                                                                                                                                                                                                                                                                                                                                                                                                                                                                                                                                                                                                                                                                                                                                                                                                                                                                                                                                                                                                                                                                                                                                                                                                                                                                                                                                                        |  | see above                                                                                                                                                                              | All India Institute of Medical Sciences, Delhi                                                                             | CSIR Institute of Genomics and Integrative Biology<br>Abhinav Jain; Afra Shannath; Anjali Bajaj; Arvindan VR; Bani Jolly; COVID CBNAAT CORE GROUP; Kiran Bala; Mercy Rophina; Mohamed Imran; Mohit Kumar Divakar; Nayer Jamshed; Praveen Aggarwal; Rahul C. Bhojar; Rama Chaudhry; Randeep Guleria; Ritu Gupta; Sridhar Sivasubbu; Subrata Sinha; Uravshi B Singh; Vigneshwar Senthivel; Vinod Scaria                                                                                                                                                                                                                                                                                                                                                                     |  |
| EPI_ISL_2686110,<br>EPI_ISL_2686137<br>EPI_ISL_770008                                                                                                                                                                                                                                                                                                                                                                                                                                                                                                                                                                                                                                                                                                                                                                                                                                                                                                                                                                                                                                                                                                                                                                                                                                                                                                                                                                                                                                                                                                                                                                                                                                                                                                                                                                                                                                                                                                                                                                                                                                                                                                                                                                                                                                                                                                                                                                                                                                                                                                                                                                                                                                                                                                                                                                                                                                                                                                                                                                                                                                                                                                                                                                                                                                                                                                                                                                                                                                                                                                                                                                                                                                                                                                                                                                                                                                                                                                                                                                                                                                                                                                                                                                                                                                                                                                                                                                                                                                                                                                                                                                                                                                                                                                                                                                                                                                                                                                                                                                                                                                                                                                                                                                                                                                                                                                                                                                                                                                                                                                                                                                                                                                                                                                                                                                                                                                                                                                                                                                                                                                                                                                                                                                                                                                                                                                                                                                                                                                                                                                                                                                                                                                                                                                                                                                                                                                                                                                                                                                                                                                                                                                                                                                                                                                                                                                                                                                                                                                                                                                                                                                                                                                                                                                                                                                                                                                                                                                                                                                                                                                                                                                                                                                                                                                                                                                                                                                                                                                                                                                                                                                                                                                                                                                                                                                                                                                                                                                                                                                                                                                                                                                                                                                                                                                                                                                                                                                                                                                                                                                                                                                                                                                                                                                                                                                                                                                                                                                                                                                                                                                                                                                                                                                                            |  | Amazon Dx, AUV2 Laboratory                                                                                                                                                             | Amazon Dx, AUV2 Laboratory                                                                                                 | Luke Meredith                                                                                                                                                                                                                                                                                                                                                                                                                                                                                                                                                                                                                                                                                                                                                             |  |
| EPI_ISL_512666                                                                                                                                                                                                                                                                                                                                                                                                                                                                                                                                                                                                                                                                                                                                                                                                                                                                                                                                                                                                                                                                                                                                                                                                                                                                                                                                                                                                                                                                                                                                                                                                                                                                                                                                                                                                                                                                                                                                                                                                                                                                                                                                                                                                                                                                                                                                                                                                                                                                                                                                                                                                                                                                                                                                                                                                                                                                                                                                                                                                                                                                                                                                                                                                                                                                                                                                                                                                                                                                                                                                                                                                                                                                                                                                                                                                                                                                                                                                                                                                                                                                                                                                                                                                                                                                                                                                                                                                                                                                                                                                                                                                                                                                                                                                                                                                                                                                                                                                                                                                                                                                                                                                                                                                                                                                                                                                                                                                                                                                                                                                                                                                                                                                                                                                                                                                                                                                                                                                                                                                                                                                                                                                                                                                                                                                                                                                                                                                                                                                                                                                                                                                                                                                                                                                                                                                                                                                                                                                                                                                                                                                                                                                                                                                                                                                                                                                                                                                                                                                                                                                                                                                                                                                                                                                                                                                                                                                                                                                                                                                                                                                                                                                                                                                                                                                                                                                                                                                                                                                                                                                                                                                                                                                                                                                                                                                                                                                                                                                                                                                                                                                                                                                                                                                                                                                                                                                                                                                                                                                                                                                                                                                                                                                                                                                                                                                                                                                                                                                                                                                                                                                                                                                                                                                                                   |  | Area De Salud Corredores                                                                                                                                                               | Incienza, Instituto Costarricense de Investigación y Enseñanza en Nutrición y Salud                                        | Adriana Godínez; Claudio Soto-Garita; Estela Cordero; Francisco Duarte; Hebleen Porras; Melany Calderón & Mariel López                                                                                                                                                                                                                                                                                                                                                                                                                                                                                                                                                                                                                                                    |  |
| EPI_ISL_512666                                                                                                                                                                                                                                                                                                                                                                                                                                                                                                                                                                                                                                                                                                                                                                                                                                                                                                                                                                                                                                                                                                                                                                                                                                                                                                                                                                                                                                                                                                                                                                                                                                                                                                                                                                                                                                                                                                                                                                                                                                                                                                                                                                                                                                                                                                                                                                                                                                                                                                                                                                                                                                                                                                                                                                                                                                                                                                                                                                                                                                                                                                                                                                                                                                                                                                                                                                                                                                                                                                                                                                                                                                                                                                                                                                                                                                                                                                                                                                                                                                                                                                                                                                                                                                                                                                                                                                                                                                                                                                                                                                                                                                                                                                                                                                                                                                                                                                                                                                                                                                                                                                                                                                                                                                                                                                                                                                                                                                                                                                                                                                                                                                                                                                                                                                                                                                                                                                                                                                                                                                                                                                                                                                                                                                                                                                                                                                                                                                                                                                                                                                                                                                                                                                                                                                                                                                                                                                                                                                                                                                                                                                                                                                                                                                                                                                                                                                                                                                                                                                                                                                                                                                                                                                                                                                                                                                                                                                                                                                                                                                                                                                                                                                                                                                                                                                                                                                                                                                                                                                                                                                                                                                                                                                                                                                                                                                                                                                                                                                                                                                                                                                                                                                                                                                                                                                                                                                                                                                                                                                                                                                                                                                                                                                                                                                                                                                                                                                                                                                                                                                                                                                                                                                                                                                   |  | Area De Salud La Cruz                                                                                                                                                                  | Incienza, Instituto Costarricense de Investigación y Enseñanza en Nutrición y Salud                                        | Adriana Godínez & Melany Calderon; Claudio Soto-Garita; Estela Cordero; Francisco Duarte; Hebleen Porras                                                                                                                                                                                                                                                                                                                                                                                                                                                                                                                                                                                                                                                                  |  |
| EPI_ISL_500697, EPI_ISL_509522, EPI_ISL_527013, EPI_ISL_527014, EPI_ISL_527018, EPI_ISL_1205815, EPI_ISL_1240991                                                                                                                                                                                                                                                                                                                                                                                                                                                                                                                                                                                                                                                                                                                                                                                                                                                                                                                                                                                                                                                                                                                                                                                                                                                                                                                                                                                                                                                                                                                                                                                                                                                                                                                                                                                                                                                                                                                                                                                                                                                                                                                                                                                                                                                                                                                                                                                                                                                                                                                                                                                                                                                                                                                                                                                                                                                                                                                                                                                                                                                                                                                                                                                                                                                                                                                                                                                                                                                                                                                                                                                                                                                                                                                                                                                                                                                                                                                                                                                                                                                                                                                                                                                                                                                                                                                                                                                                                                                                                                                                                                                                                                                                                                                                                                                                                                                                                                                                                                                                                                                                                                                                                                                                                                                                                                                                                                                                                                                                                                                                                                                                                                                                                                                                                                                                                                                                                                                                                                                                                                                                                                                                                                                                                                                                                                                                                                                                                                                                                                                                                                                                                                                                                                                                                                                                                                                                                                                                                                                                                                                                                                                                                                                                                                                                                                                                                                                                                                                                                                                                                                                                                                                                                                                                                                                                                                                                                                                                                                                                                                                                                                                                                                                                                                                                                                                                                                                                                                                                                                                                                                                                                                                                                                                                                                                                                                                                                                                                                                                                                                                                                                                                                                                                                                                                                                                                                                                                                                                                                                                                                                                                                                                                                                                                                                                                                                                                                                                                                                                                                                                                                                                                 |  | see above                                                                                                                                                                              | Area of Virology, Serology and Virology Division (SAVID), New South Wales Health Pathology Randwick                        | Au, J.; Bull, R.; Deveson, I.; Foster, C.; Rawlinson, W.; Ruiz Silva, M.; Van Hal, S.                                                                                                                                                                                                                                                                                                                                                                                                                                                                                                                                                                                                                                                                                     |  |
| EPI_ISL_707899, EPI_ISL_1098798, EPI_ISL_1098799, EPI_ISL_1121974, EPI_ISL_1184504, EPI_ISL_1293049, EPI_ISL_1406433, EPI_ISL_1424505, EPI_ISL_1494721, EPI_ISL_1615595, EPI_ISL_1615596, EPI_ISL_1615597, EPI_ISL_1615598, EPI_ISL_1633348, EPI_ISL_1633353, EPI_ISL_1672867, EPI_ISL_1911182, EPI_ISL_1911185, EPI_ISL_1911187, EPI_ISL_1911189, EPI_ISL_1911190, EPI_ISL_1911191, EPI_ISL_2404984, EPI_ISL_2404990                                                                                                                                                                                                                                                                                                                                                                                                                                                                                                                                                                                                                                                                                                                                                                                                                                                                                                                                                                                                                                                                                                                                                                                                                                                                                                                                                                                                                                                                                                                                                                                                                                                                                                                                                                                                                                                                                                                                                                                                                                                                                                                                                                                                                                                                                                                                                                                                                                                                                                                                                                                                                                                                                                                                                                                                                                                                                                                                                                                                                                                                                                                                                                                                                                                                                                                                                                                                                                                                                                                                                                                                                                                                                                                                                                                                                                                                                                                                                                                                                                                                                                                                                                                                                                                                                                                                                                                                                                                                                                                                                                                                                                                                                                                                                                                                                                                                                                                                                                                                                                                                                                                                                                                                                                                                                                                                                                                                                                                                                                                                                                                                                                                                                                                                                                                                                                                                                                                                                                                                                                                                                                                                                                                                                                                                                                                                                                                                                                                                                                                                                                                                                                                                                                                                                                                                                                                                                                                                                                                                                                                                                                                                                                                                                                                                                                                                                                                                                                                                                                                                                                                                                                                                                                                                                                                                                                                                                                                                                                                                                                                                                                                                                                                                                                                                                                                                                                                                                                                                                                                                                                                                                                                                                                                                                                                                                                                                                                                                                                                                                                                                                                                                                                                                                                                                                                                                                                                                                                                                                                                                                                                                                                                                                                                                                                                                                            |  | see above                                                                                                                                                                              | Area of Virology, Serology and Virology Division (SAVID), New South Wales Health Pathology Randwick                        | Au, J.; Bull, R.; Deveson, I.; Foster, C.; Rawlinson, W.; Ruiz Silva, M.; Van Hal, S.; Wong, M.                                                                                                                                                                                                                                                                                                                                                                                                                                                                                                                                                                                                                                                                           |  |
| EPI_ISL_1593888,<br>EPI_ISL_1595718                                                                                                                                                                                                                                                                                                                                                                                                                                                                                                                                                                                                                                                                                                                                                                                                                                                                                                                                                                                                                                                                                                                                                                                                                                                                                                                                                                                                                                                                                                                                                                                                                                                                                                                                                                                                                                                                                                                                                                                                                                                                                                                                                                                                                                                                                                                                                                                                                                                                                                                                                                                                                                                                                                                                                                                                                                                                                                                                                                                                                                                                                                                                                                                                                                                                                                                                                                                                                                                                                                                                                                                                                                                                                                                                                                                                                                                                                                                                                                                                                                                                                                                                                                                                                                                                                                                                                                                                                                                                                                                                                                                                                                                                                                                                                                                                                                                                                                                                                                                                                                                                                                                                                                                                                                                                                                                                                                                                                                                                                                                                                                                                                                                                                                                                                                                                                                                                                                                                                                                                                                                                                                                                                                                                                                                                                                                                                                                                                                                                                                                                                                                                                                                                                                                                                                                                                                                                                                                                                                                                                                                                                                                                                                                                                                                                                                                                                                                                                                                                                                                                                                                                                                                                                                                                                                                                                                                                                                                                                                                                                                                                                                                                                                                                                                                                                                                                                                                                                                                                                                                                                                                                                                                                                                                                                                                                                                                                                                                                                                                                                                                                                                                                                                                                                                                                                                                                                                                                                                                                                                                                                                                                                                                                                                                                                                                                                                                                                                                                                                                                                                                                                                                                                                                                              |  | Armed Forces Institute of Pathology (AFIP), Dhaka Cantonment                                                                                                                           | Genomic Research Lab, BCSIR                                                                                                | Abu Sayeed Mohammad Mahmud; Barna Goswami; Eshrar Osman; Iffat Jahan; Md. Ahasan Habib; Md. Kamrul Islam; Md. Murshed Hasan Sarkar; Md. Saddam Hossain; Md. Salim Khan; Mohammad Mizanur Rahman; Mohammad Mohi Uddin; Mohammad Samir Uzzaman; Shahina Akter; Susane Giti; Tanjina Akhter Banu                                                                                                                                                                                                                                                                                                                                                                                                                                                                             |  |
| EPI_ISL_2304055, EPI_ISL_2304086, EPI_ISL_2304087, EPI_ISL_2304088, EPI_ISL_2304089, EPI_ISL_2304092, EPI_ISL_2304093, EPI_ISL_2304094, EPI_ISL_2304095, EPI_ISL_2304096, EPI_ISL_2304097, EPI_ISL_2304098, EPI_ISL_2304100, EPI_ISL_2304101, EPI_ISL_2304108, EPI_ISL_2304109, EPI_ISL_2304110, EPI_ISL_2304112, EPI_ISL_2304113, EPI_ISL_2304114, EPI_ISL_2304116, EPI_ISL_2304117, EPI_ISL_2304118, EPI_ISL_2304120, EPI_ISL_2304121, EPI_ISL_2304124, EPI_ISL_2304125, EPI_ISL_2304126, EPI_ISL_2304128                                                                                                                                                                                                                                                                                                                                                                                                                                                                                                                                                                                                                                                                                                                                                                                                                                                                                                                                                                                                                                                                                                                                                                                                                                                                                                                                                                                                                                                                                                                                                                                                                                                                                                                                                                                                                                                                                                                                                                                                                                                                                                                                                                                                                                                                                                                                                                                                                                                                                                                                                                                                                                                                                                                                                                                                                                                                                                                                                                                                                                                                                                                                                                                                                                                                                                                                                                                                                                                                                                                                                                                                                                                                                                                                                                                                                                                                                                                                                                                                                                                                                                                                                                                                                                                                                                                                                                                                                                                                                                                                                                                                                                                                                                                                                                                                                                                                                                                                                                                                                                                                                                                                                                                                                                                                                                                                                                                                                                                                                                                                                                                                                                                                                                                                                                                                                                                                                                                                                                                                                                                                                                                                                                                                                                                                                                                                                                                                                                                                                                                                                                                                                                                                                                                                                                                                                                                                                                                                                                                                                                                                                                                                                                                                                                                                                                                                                                                                                                                                                                                                                                                                                                                                                                                                                                                                                                                                                                                                                                                                                                                                                                                                                                                                                                                                                                                                                                                                                                                                                                                                                                                                                                                                                                                                                                                                                                                                                                                                                                                                                                                                                                                                                                                                                                                                                                                                                                                                                                                                                                                                                                                                                                                                                                                                      |  | see above                                                                                                                                                                              | Armed Forces Medical College Pune                                                                                          | Ajay Pillai; Dhiraj Paul; INSACOG Consortium team; Manoj Kumar Bhat; Mitali Inamdar; Mohak P Gujare; Shivang P. Bhanushali; Yogesh Shouche                                                                                                                                                                                                                                                                                                                                                                                                                                                                                                                                                                                                                                |  |
| EPI_ISL_1827951                                                                                                                                                                                                                                                                                                                                                                                                                                                                                                                                                                                                                                                                                                                                                                                                                                                                                                                                                                                                                                                                                                                                                                                                                                                                                                                                                                                                                                                                                                                                                                                                                                                                                                                                                                                                                                                                                                                                                                                                                                                                                                                                                                                                                                                                                                                                                                                                                                                                                                                                                                                                                                                                                                                                                                                                                                                                                                                                                                                                                                                                                                                                                                                                                                                                                                                                                                                                                                                                                                                                                                                                                                                                                                                                                                                                                                                                                                                                                                                                                                                                                                                                                                                                                                                                                                                                                                                                                                                                                                                                                                                                                                                                                                                                                                                                                                                                                                                                                                                                                                                                                                                                                                                                                                                                                                                                                                                                                                                                                                                                                                                                                                                                                                                                                                                                                                                                                                                                                                                                                                                                                                                                                                                                                                                                                                                                                                                                                                                                                                                                                                                                                                                                                                                                                                                                                                                                                                                                                                                                                                                                                                                                                                                                                                                                                                                                                                                                                                                                                                                                                                                                                                                                                                                                                                                                                                                                                                                                                                                                                                                                                                                                                                                                                                                                                                                                                                                                                                                                                                                                                                                                                                                                                                                                                                                                                                                                                                                                                                                                                                                                                                                                                                                                                                                                                                                                                                                                                                                                                                                                                                                                                                                                                                                                                                                                                                                                                                                                                                                                                                                                                                                                                                                                                                  |  | Australian Infectious Disease Research Centre, School of Chemistry and Molecular Biosciences, The University of Queensland                                                             | Australian Infectious Disease Research Centre, School of Chemistry and Molecular Biosciences, The University of Queensland | Parry; R.H. and Khromykh, A.                                                                                                                                                                                                                                                                                                                                                                                                                                                                                                                                                                                                                                                                                                                                              |  |
| EPI_ISL_583637, EPI_ISL_583662, EPI_ISL_934436, EPI_ISL_2137225, EPI_ISL_2232832, EPI_ISL_2324190, EPI_ISL_2324315, EPI_ISL_2485065, EPI_ISL_2485083, EPI_ISL_2616202, EPI_ISL_2616245, EPI_ISL_2616260, EPI_ISL_2617655, EPI_ISL_2758039, EPI_ISL_2758056                                                                                                                                                                                                                                                                                                                                                                                                                                                                                                                                                                                                                                                                                                                                                                                                                                                                                                                                                                                                                                                                                                                                                                                                                                                                                                                                                                                                                                                                                                                                                                                                                                                                                                                                                                                                                                                                                                                                                                                                                                                                                                                                                                                                                                                                                                                                                                                                                                                                                                                                                                                                                                                                                                                                                                                                                                                                                                                                                                                                                                                                                                                                                                                                                                                                                                                                                                                                                                                                                                                                                                                                                                                                                                                                                                                                                                                                                                                                                                                                                                                                                                                                                                                                                                                                                                                                                                                                                                                                                                                                                                                                                                                                                                                                                                                                                                                                                                                                                                                                                                                                                                                                                                                                                                                                                                                                                                                                                                                                                                                                                                                                                                                                                                                                                                                                                                                                                                                                                                                                                                                                                                                                                                                                                                                                                                                                                                                                                                                                                                                                                                                                                                                                                                                                                                                                                                                                                                                                                                                                                                                                                                                                                                                                                                                                                                                                                                                                                                                                                                                                                                                                                                                                                                                                                                                                                                                                                                                                                                                                                                                                                                                                                                                                                                                                                                                                                                                                                                                                                                                                                                                                                                                                                                                                                                                                                                                                                                                                                                                                                                                                                                                                                                                                                                                                                                                                                                                                                                                                                                                                                                                                                                                                                                                                                                                                                                                                                                                                                                                       |  | see above                                                                                                                                                                              | Austrian Agency for Health and Food Safety (AGES)                                                                          | Berghthaler laboratory, CeMM Research Center for Molecular Medicine of the Austrian Academy of Sciences<br>Adi Steinrigl; Alexander Lercher; Alexandra Popa; Andreas Berghthaler; Anna Schedl; Bekir Erguner; Benedikt Agerer; Christian Paar; Christoph Bock; Daniela Schmid; Dorothee von Laer; Elisabeth Puchhammer-Stoeckl; Fabian Amman; Franz Allerberger; Gernot Walder; Gregor Hörmann; Guenter Weiss; Gunther Vogli; Henricke Colaco; Jakob-Wendelin Genger; Jan Laine; Judith Aberle; Kinga Rieger-Hohenwarter; Lukas Endler; Maelle Le Moing; Manfred Nairz; Mark Smyth; Martin Senekowitsch; Matthew Thornton; Michael Schuster; Peter Hufnagl; Peter Obrist; Petr Triska; Rainer Gattringer; Sabine Sussitz-Rack; Stephan Aberle; Thomas Penz; Wegene Borena |  |
| EPI_ISL_882639                                                                                                                                                                                                                                                                                                                                                                                                                                                                                                                                                                                                                                                                                                                                                                                                                                                                                                                                                                                                                                                                                                                                                                                                                                                                                                                                                                                                                                                                                                                                                                                                                                                                                                                                                                                                                                                                                                                                                                                                                                                                                                                                                                                                                                                                                                                                                                                                                                                                                                                                                                                                                                                                                                                                                                                                                                                                                                                                                                                                                                                                                                                                                                                                                                                                                                                                                                                                                                                                                                                                                                                                                                                                                                                                                                                                                                                                                                                                                                                                                                                                                                                                                                                                                                                                                                                                                                                                                                                                                                                                                                                                                                                                                                                                                                                                                                                                                                                                                                                                                                                                                                                                                                                                                                                                                                                                                                                                                                                                                                                                                                                                                                                                                                                                                                                                                                                                                                                                                                                                                                                                                                                                                                                                                                                                                                                                                                                                                                                                                                                                                                                                                                                                                                                                                                                                                                                                                                                                                                                                                                                                                                                                                                                                                                                                                                                                                                                                                                                                                                                                                                                                                                                                                                                                                                                                                                                                                                                                                                                                                                                                                                                                                                                                                                                                                                                                                                                                                                                                                                                                                                                                                                                                                                                                                                                                                                                                                                                                                                                                                                                                                                                                                                                                                                                                                                                                                                                                                                                                                                                                                                                                                                                                                                                                                                                                                                                                                                                                                                                                                                                                                                                                                                                                                                   |  | Azerbaijan National Hematology Center Division of Medical Genetics                                                                                                                     | Azerbaijan National Hematology Center Division of Medical Genetics                                                         | Aghayev Agha Rza; Bayramli Ramin                                                                                                                                                                                                                                                                                                                                                                                                                                                                                                                                                                                                                                                                                                                                          |  |
| EPI_ISL_1840787, EPI_ISL_2080266, EPI_ISL_2080267, EPI_ISL_2080268, EPI_ISL_2080270, EPI_ISL_2372806, EPI_ISL_2550684                                                                                                                                                                                                                                                                                                                                                                                                                                                                                                                                                                                                                                                                                                                                                                                                                                                                                                                                                                                                                                                                                                                                                                                                                                                                                                                                                                                                                                                                                                                                                                                                                                                                                                                                                                                                                                                                                                                                                                                                                                                                                                                                                                                                                                                                                                                                                                                                                                                                                                                                                                                                                                                                                                                                                                                                                                                                                                                                                                                                                                                                                                                                                                                                                                                                                                                                                                                                                                                                                                                                                                                                                                                                                                                                                                                                                                                                                                                                                                                                                                                                                                                                                                                                                                                                                                                                                                                                                                                                                                                                                                                                                                                                                                                                                                                                                                                                                                                                                                                                                                                                                                                                                                                                                                                                                                                                                                                                                                                                                                                                                                                                                                                                                                                                                                                                                                                                                                                                                                                                                                                                                                                                                                                                                                                                                                                                                                                                                                                                                                                                                                                                                                                                                                                                                                                                                                                                                                                                                                                                                                                                                                                                                                                                                                                                                                                                                                                                                                                                                                                                                                                                                                                                                                                                                                                                                                                                                                                                                                                                                                                                                                                                                                                                                                                                                                                                                                                                                                                                                                                                                                                                                                                                                                                                                                                                                                                                                                                                                                                                                                                                                                                                                                                                                                                                                                                                                                                                                                                                                                                                                                                                                                                                                                                                                                                                                                                                                                                                                                                                                                                                                                                            |  | see above                                                                                                                                                                              | Azienda Sanitaria dell'Alto Adige Laboratorio Aziendale di Microbiologia e Virologia                                       | Istituto di Genomica Applicata<br>Davide Scaglione; Eleonora Paparelli; Elisa Masi; Elisabetta Giacobazzi; Elisabetta Pagani; Gabriele Magris; Irena Jurman; Irene Bianconi; Michele Morgante; Stefanie Wieser; Vera Vendramin                                                                                                                                                                                                                                                                                                                                                                                                                                                                                                                                            |  |
| EPI_ISL_2389632, EPI_ISL_2389634, EPI_ISL_2389636, EPI_ISL_2389638, EPI_ISL_2389640, EPI_ISL_2389641, EPI_ISL_2389642, EPI_ISL_2389643, EPI_ISL_2389644, EPI_ISL_2389645, EPI_ISL_2389651, EPI_ISL_2389652, EPI_ISL_2389655, EPI_ISL_2389657                                                                                                                                                                                                                                                                                                                                                                                                                                                                                                                                                                                                                                                                                                                                                                                                                                                                                                                                                                                                                                                                                                                                                                                                                                                                                                                                                                                                                                                                                                                                                                                                                                                                                                                                                                                                                                                                                                                                                                                                                                                                                                                                                                                                                                                                                                                                                                                                                                                                                                                                                                                                                                                                                                                                                                                                                                                                                                                                                                                                                                                                                                                                                                                                                                                                                                                                                                                                                                                                                                                                                                                                                                                                                                                                                                                                                                                                                                                                                                                                                                                                                                                                                                                                                                                                                                                                                                                                                                                                                                                                                                                                                                                                                                                                                                                                                                                                                                                                                                                                                                                                                                                                                                                                                                                                                                                                                                                                                                                                                                                                                                                                                                                                                                                                                                                                                                                                                                                                                                                                                                                                                                                                                                                                                                                                                                                                                                                                                                                                                                                                                                                                                                                                                                                                                                                                                                                                                                                                                                                                                                                                                                                                                                                                                                                                                                                                                                                                                                                                                                                                                                                                                                                                                                                                                                                                                                                                                                                                                                                                                                                                                                                                                                                                                                                                                                                                                                                                                                                                                                                                                                                                                                                                                                                                                                                                                                                                                                                                                                                                                                                                                                                                                                                                                                                                                                                                                                                                                                                                                                                                                                                                                                                                                                                                                                                                                                                                                                                                                                                                     |  | see above                                                                                                                                                                              | B.J. Medical College and Civil Hospital, Ahmedabad                                                                         | Chaitanya Joshi; Dinesh Kumar; Janvi Raval; Madhvi Joshi; Nitesh Shah; Nitin Savaliya; Pranay Shah; Ramesh Pandit; Sonal Sharma; Twinkle Soni; Umang Mishra; Zarna Patel; Zuber Saiyed                                                                                                                                                                                                                                                                                                                                                                                                                                                                                                                                                                                    |  |
| EPI_ISL_1969249                                                                                                                                                                                                                                                                                                                                                                                                                                                                                                                                                                                                                                                                                                                                                                                                                                                                                                                                                                                                                                                                                                                                                                                                                                                                                                                                                                                                                                                                                                                                                                                                                                                                                                                                                                                                                                                                                                                                                                                                                                                                                                                                                                                                                                                                                                                                                                                                                                                                                                                                                                                                                                                                                                                                                                                                                                                                                                                                                                                                                                                                                                                                                                                                                                                                                                                                                                                                                                                                                                                                                                                                                                                                                                                                                                                                                                                                                                                                                                                                                                                                                                                                                                                                                                                                                                                                                                                                                                                                                                                                                                                                                                                                                                                                                                                                                                                                                                                                                                                                                                                                                                                                                                                                                                                                                                                                                                                                                                                                                                                                                                                                                                                                                                                                                                                                                                                                                                                                                                                                                                                                                                                                                                                                                                                                                                                                                                                                                                                                                                                                                                                                                                                                                                                                                                                                                                                                                                                                                                                                                                                                                                                                                                                                                                                                                                                                                                                                                                                                                                                                                                                                                                                                                                                                                                                                                                                                                                                                                                                                                                                                                                                                                                                                                                                                                                                                                                                                                                                                                                                                                                                                                                                                                                                                                                                                                                                                                                                                                                                                                                                                                                                                                                                                                                                                                                                                                                                                                                                                                                                                                                                                                                                                                                                                                                                                                                                                                                                                                                                                                                                                                                                                                                                                                                  |  | BBLK Palembang                                                                                                                                                                         | National Institute of Health Research and Development                                                                      | Arie Ardiansyah Nugraha; Hana Aparsi Pawestri; Hartanti Dian Ikawati; Kartika Dewi Puspa; Krisna Pangesti; Nelly Puspandari; Subangkit; Triyani Soekarso; Vivi Setiawaty                                                                                                                                                                                                                                                                                                                                                                                                                                                                                                                                                                                                  |  |
| EPI_ISL_2728297, EPI_ISL_2728300, EPI_ISL_2728302, EPI_ISL_2728303, EPI_ISL_2728304, EPI_ISL_2728305, EPI_ISL_2728306, EPI_ISL_2728307, EPI_ISL_2728465, EPI_ISL_2728466, EPI_ISL_2728469, EPI_ISL_2728472, EPI_ISL_2728473, EPI_ISL_2728474, EPI_ISL_2728475, EPI_ISL_2728476, EPI_ISL_2728477, EPI_ISL_2728479                                                                                                                                                                                                                                                                                                                                                                                                                                                                                                                                                                                                                                                                                                                                                                                                                                                                                                                                                                                                                                                                                                                                                                                                                                                                                                                                                                                                                                                                                                                                                                                                                                                                                                                                                                                                                                                                                                                                                                                                                                                                                                                                                                                                                                                                                                                                                                                                                                                                                                                                                                                                                                                                                                                                                                                                                                                                                                                                                                                                                                                                                                                                                                                                                                                                                                                                                                                                                                                                                                                                                                                                                                                                                                                                                                                                                                                                                                                                                                                                                                                                                                                                                                                                                                                                                                                                                                                                                                                                                                                                                                                                                                                                                                                                                                                                                                                                                                                                                                                                                                                                                                                                                                                                                                                                                                                                                                                                                                                                                                                                                                                                                                                                                                                                                                                                                                                                                                                                                                                                                                                                                                                                                                                                                                                                                                                                                                                                                                                                                                                                                                                                                                                                                                                                                                                                                                                                                                                                                                                                                                                                                                                                                                                                                                                                                                                                                                                                                                                                                                                                                                                                                                                                                                                                                                                                                                                                                                                                                                                                                                                                                                                                                                                                                                                                                                                                                                                                                                                                                                                                                                                                                                                                                                                                                                                                                                                                                                                                                                                                                                                                                                                                                                                                                                                                                                                                                                                                                                                                                                                                                                                                                                                                                                                                                                                                                                                                                                                                 |  | see above                                                                                                                                                                              | BBMP Urban                                                                                                                 | Ananthapadmanabha Kotambail; Anita S Desai; Anson Kunjumon George; Chetan G K; Chitra Pattabiraman; Darshan Sreenivas; Ellango Ramasamy; Gautham Arunachal Udipi; Mahesh Kumar.C.S; Sony Sharma; V Ravi                                                                                                                                                                                                                                                                                                                                                                                                                                                                                                                                                                   |  |
| EPI_ISL_1007661                                                                                                                                                                                                                                                                                                                                                                                                                                                                                                                                                                                                                                                                                                                                                                                                                                                                                                                                                                                                                                                                                                                                                                                                                                                                                                                                                                                                                                                                                                                                                                                                                                                                                                                                                                                                                                                                                                                                                                                                                                                                                                                                                                                                                                                                                                                                                                                                                                                                                                                                                                                                                                                                                                                                                                                                                                                                                                                                                                                                                                                                                                                                                                                                                                                                                                                                                                                                                                                                                                                                                                                                                                                                                                                                                                                                                                                                                                                                                                                                                                                                                                                                                                                                                                                                                                                                                                                                                                                                                                                                                                                                                                                                                                                                                                                                                                                                                                                                                                                                                                                                                                                                                                                                                                                                                                                                                                                                                                                                                                                                                                                                                                                                                                                                                                                                                                                                                                                                                                                                                                                                                                                                                                                                                                                                                                                                                                                                                                                                                                                                                                                                                                                                                                                                                                                                                                                                                                                                                                                                                                                                                                                                                                                                                                                                                                                                                                                                                                                                                                                                                                                                                                                                                                                                                                                                                                                                                                                                                                                                                                                                                                                                                                                                                                                                                                                                                                                                                                                                                                                                                                                                                                                                                                                                                                                                                                                                                                                                                                                                                                                                                                                                                                                                                                                                                                                                                                                                                                                                                                                                                                                                                                                                                                                                                                                                                                                                                                                                                                                                                                                                                                                                                                                                                                  |  | BBMP Urban PHC                                                                                                                                                                         | Department of Neurovirology, National Institute of Mental Health and Neurosciences (NIMHANS)                               | Anita S Desai; Anson Kunjumon George; Chitra Pattabiraman; Darshan Sreenivas; Nakka Vijay Kiran Reddy; Pramada Prasad; Risha Rasheed; V Ravi                                                                                                                                                                                                                                                                                                                                                                                                                                                                                                                                                                                                                              |  |
| EPI_ISL_969453, EPI_ISL_2522408, EPI_ISL_2523674, EPI_ISL_2524651, EPI_ISL_2529589, EPI_ISL_2530862, EPI_ISL_2530880, EPI_ISL_2530909, EPI_ISL_2530922, EPI_ISL_2530949, EPI_ISL_2530951, EPI_ISL_2530954, EPI_ISL_2530962, EPI_ISL_2531015, EPI_ISL_2531020, EPI_ISL_2531022, EPI_ISL_2531043, EPI_ISL_2531046, EPI_ISL_2531048, EPI_ISL_2531050, EPI_ISL_2531058, EPI_ISL_2531067, EPI_ISL_2531077, EPI_ISL_2531079, EPI_ISL_2531082, EPI_ISL_2531084, EPI_ISL_2531086, EPI_ISL_2531090, EPI_ISL_2531092, EPI_ISL_2531094, EPI_ISL_2531096, EPI_ISL_2531097, EPI_ISL_2531098, EPI_ISL_2531099, EPI_ISL_2531100, EPI_ISL_2531102, EPI_ISL_2531103, EPI_ISL_2531104, EPI_ISL_2531105, EPI_ISL_2531106, EPI_ISL_2531107, EPI_ISL_2531108, EPI_ISL_2531109, EPI_ISL_2531110, EPI_ISL_2531111, EPI_ISL_2531112, EPI_ISL_2531113, EPI_ISL_2531114, EPI_ISL_2531115, EPI_ISL_2531116, EPI_ISL_2531117, EPI_ISL_2531118, EPI_ISL_2531119, EPI_ISL_2531120, EPI_ISL_2531121, EPI_ISL_2531122, EPI_ISL_2531123, EPI_ISL_2531124, EPI_ISL_2531125, EPI_ISL_2531126, EPI_ISL_2531127, EPI_ISL_2531128, EPI_ISL_2531129, EPI_ISL_2531130, EPI_ISL_2531131, EPI_ISL_2531132, EPI_ISL_2531133, EPI_ISL_2531134, EPI_ISL_2531135, EPI_ISL_2531136, EPI_ISL_2531137, EPI_ISL_2531138, EPI_ISL_2531139, EPI_ISL_2531140, EPI_ISL_2531141, EPI_ISL_2531142, EPI_ISL_2531143, EPI_ISL_2531144, EPI_ISL_2531145, EPI_ISL_2531146, EPI_ISL_2531147, EPI_ISL_2531148, EPI_ISL_2531149, EPI_ISL_2531150, EPI_ISL_2531151, EPI_ISL_2531152, EPI_ISL_2531153, EPI_ISL_2531154, EPI_ISL_2531155, EPI_ISL_2531156, EPI_ISL_2531157, EPI_ISL_2531158, EPI_ISL_2531159, EPI_ISL_2531160, EPI_ISL_2531161, EPI_ISL_2531162, EPI_ISL_2531163, EPI_ISL_2531164, EPI_ISL_2531165, EPI_ISL_2531166, EPI_ISL_2531167, EPI_ISL_2531168, EPI_ISL_2531169, EPI_ISL_2531170, EPI_ISL_2531171, EPI_ISL_2531172, EPI_ISL_2531173, EPI_ISL_2531174, EPI_ISL_2531175, EPI_ISL_2531176, EPI_ISL_2531177, EPI_ISL_2531178, EPI_ISL_2531179, EPI_ISL_2531180, EPI_ISL_2531181, EPI_ISL_2531182, EPI_ISL_2531183, EPI_ISL_2531184, EPI_ISL_2531185, EPI_ISL_2531186, EPI_ISL_2531187, EPI_ISL_2531188, EPI_ISL_2531189, EPI_ISL_2531190, EPI_ISL_2531191, EPI_ISL_2531192, EPI_ISL_2531193, EPI_ISL_2531194, EPI_ISL_2531195, EPI_ISL_2531196, EPI_ISL_2531197, EPI_ISL_2531198, EPI_ISL_2531199, EPI_ISL_2531200, EPI_ISL_2531201, EPI_ISL_2531202, EPI_ISL_2531203, EPI_ISL_2531204, EPI_ISL_2531205, EPI_ISL_2531206, EPI_ISL_2531207, EPI_ISL_2531208, EPI_ISL_2531209, EPI_ISL_2531210, EPI_ISL_2531211, EPI_ISL_2531212, EPI_ISL_2531213, EPI_ISL_2531214, EPI_ISL_2531215, EPI_ISL_2531216, EPI_ISL_2531217, EPI_ISL_2531218, EPI_ISL_2531219, EPI_ISL_2531220, EPI_ISL_2531221, EPI_ISL_2531222, EPI_ISL_2531223, EPI_ISL_2531224, EPI_ISL_2531225, EPI_ISL_2531226, EPI_ISL_2531227, EPI_ISL_2531228, EPI_ISL_2531229, EPI_ISL_2531230, EPI_ISL_2531231, EPI_ISL_2531232, EPI_ISL_2531233, EPI_ISL_2531234, EPI_ISL_2531235, EPI_ISL_2531236, EPI_ISL_2531237, EPI_ISL_2531238, EPI_ISL_2531239, EPI_ISL_2531240, EPI_ISL_2531241, EPI_ISL_2531242, EPI_ISL_2531243, EPI_ISL_2531244, EPI_ISL_2531245, EPI_ISL_2531246, EPI_ISL_2531247, EPI_ISL_2531248, EPI_ISL_2531249, EPI_ISL_2531250, EPI_ISL_2531251, EPI_ISL_2531252, EPI_ISL_2531253, EPI_ISL_2531254, EPI_ISL_2531255, EPI_ISL_2531256, EPI_ISL_2531257, EPI_ISL_2531258, EPI_ISL_2531259, EPI_ISL_2531260, EPI_ISL_2531261, EPI_ISL_2531262, EPI_ISL_2531263, EPI_ISL_2531264, EPI_ISL_2531265, EPI_ISL_2531266, EPI_ISL_2531267, EPI_ISL_2531268, EPI_ISL_2531269, EPI_ISL_2531270, EPI_ISL_2531271, EPI_ISL_2531272, EPI_ISL_2531273, EPI_ISL_2531274, EPI_ISL_2531275, EPI_ISL_2531276, EPI_ISL_2531277, EPI_ISL_2531278, EPI_ISL_2531279, EPI_ISL_2531280, EPI_ISL_2531281, EPI_ISL_2531282, EPI_ISL_2531283, EPI_ISL_2531284, EPI_ISL_2531285, EPI_ISL_2531286, EPI_ISL_2531287, EPI_ISL_2531288, EPI_ISL_2531289, EPI_ISL_2531290, EPI_ISL_2531291, EPI_ISL_2531292, EPI_ISL_2531293, EPI_ISL_2531294, EPI_ISL_2531295, EPI_ISL_2531296, EPI_ISL_2531297, EPI_ISL_2531298, EPI_ISL_2531299, EPI_ISL_2531300, EPI_ISL_2531301, EPI_ISL_2531302, EPI_ISL_2531303, EPI_ISL_2531304, EPI_ISL_2531305, EPI_ISL_2531306, EPI_ISL_2531307, EPI_ISL_2531308, EPI_ISL_2531309, EPI_ISL_2531310, EPI_ISL_2531311, EPI_ISL_2531312, EPI_ISL_2531313, EPI_ISL_2531314, EPI_ISL_2531315, EPI_ISL_2531316, EPI_ISL_2531317, EPI_ISL_2531318, EPI_ISL_2531319, EPI_ISL_2531320, EPI_ISL_2531321, EPI_ISL_2531322, EPI_ISL_2531323, EPI_ISL_2531324, EPI_ISL_2531325, EPI_ISL_2531326, EPI_ISL_2531327, EPI_ISL_2531328, EPI_ISL_2531329, EPI_ISL_2531330, EPI_ISL_2531331, EPI_ISL_2531332, EPI_ISL_2531333, EPI_ISL_2531334, EPI_ISL_2531335, EPI_ISL_2531336, EPI_ISL_2531337, EPI_ISL_2531338, EPI_ISL_2531339, EPI_ISL_2531340, EPI_ISL_2531341, EPI_ISL_2531342, EPI_ISL_2531343, EPI_ISL_2531344, EPI_ISL_2531345, EPI_ISL_2531346, EPI_ISL_2531347, EPI_ISL_2531348, EPI_ISL_2531349, EPI_ISL_2531350, EPI_ISL_2531351, EPI_ISL_2531352, EPI_ISL_2531353, EPI_ISL_2531354, EPI_ISL_2531355, EPI_ISL_2531356, EPI_ISL_2531357, EPI_ISL_2531358, EPI_ISL_2531359, EPI_ISL_2531360, EPI_ISL_2531361, EPI_ISL_2531362, EPI_ISL_2531363, EPI_ISL_2531364, EPI_ISL_2531365, EPI_ISL_2531366, EPI_ISL_2531367, EPI_ISL_2531368, EPI_ISL_2531369, EPI_ISL_2531370, EPI_ISL_2531371, EPI_ISL_2531372, EPI_ISL_2531373, EPI_ISL_2531374, EPI_ISL_2531375, EPI_ISL_2531376, EPI_ISL_2531377, EPI_ISL_2531378, EPI_ISL_2531379, EPI_ISL_2531380, EPI_ISL_2531381, EPI_ISL_2531382, EPI_ISL_2531383, EPI_ISL_2531384, EPI_ISL_2531385, EPI_ISL_2531386, EPI_ISL_2531387, EPI_ISL_2531388, EPI_ISL_2531389, EPI_ISL_2531390, EPI_ISL_2531391, EPI_ISL_2531392, EPI_ISL_2531393, EPI_ISL_2531394, EPI_ISL_2531395, EPI_ISL_2531396, EPI_ISL_2531397, EPI_ISL_2531398, EPI_ISL_2531399, EPI_ISL_2531400, EPI_ISL_2531401, EPI_ISL_2531402, EPI_ISL_2531403, EPI_ISL_2531404, EPI_ISL_2531405, EPI_ISL_2531406, EPI_ISL_2531407, EPI_ISL_2531408, EPI_ISL_2531409, EPI_ISL_2531410, EPI_ISL_2531411, EPI_ISL_2531412, EPI_ISL_2531413, EPI_ISL_2531414, EPI_ISL_2531415, EPI_ISL_2531416, EPI_ISL_2531417, EPI_ISL_2531418, EPI_ISL_2531419, EPI_ISL_2531420, EPI_ISL_2531421, EPI_ISL_2531422, EPI_ISL_2531423, EPI_ISL_2531424, EPI_ISL_2531425, EPI_ISL_2531426, EPI_ISL_2531427, EPI_ISL_2531428, EPI_ISL_2531429, EPI_ISL_2531430, EPI_ISL_2531431, EPI_ISL_2531432, EPI_ISL_2531433, EPI_ISL_2531434, EPI_ISL_2531435, EPI_ISL_2531436, EPI_ISL_2531437, EPI_ISL_2531438, EPI_ISL_2531439, EPI_ISL_2531440, EPI_ISL_2531441, EPI_ISL_2531442, EPI_ISL_2531443, EPI_ISL_2531444, EPI_ISL_2531445, EPI_ISL_2531446, EPI_ISL_2531447, EPI_ISL_2531448, EPI_ISL_2531449, EPI_ISL_2531450, EPI_ISL_2531451, EPI_ISL_2531452, EPI_ISL_2531453, EPI_ISL_2531454, EPI_ISL_2531455, EPI_ISL_2531456, EPI_ISL_2531457, EPI_ISL_2531458, EPI_ISL_2531459, EPI_ISL_2531460, EPI_ISL_2531461, EPI_ISL_2531462, EPI_ISL_2531463, EPI_ISL_2531464, EPI_ISL_2531465, EPI_ISL_2531466, EPI_ISL_2531467, EPI_ISL_2531468, EPI_ISL_2531469, EPI_ISL_2531470, EPI_ISL_2531471, EPI_ISL_2531472, EPI_ISL_2531473, EPI_ISL_2531474, EPI_ISL_2531475, EPI_ISL_2531476, EPI_ISL_2531477, EPI_ISL_2531478, EPI_ISL_2531479, EPI_ISL_2531480, EPI_ISL_2531481, EPI_ISL_2531482, EPI_ISL_2531483, EPI_ISL_2531484, EPI_ISL_2531485, EPI_ISL_2531486, EPI_ISL_2531487, EPI_ISL_2531488, EPI_ISL_2531489, EPI_ISL_2531490, EPI_ISL_2531491, EPI_ISL_2531492, EPI_ISL_2531493, EPI_ISL_2531494, EPI_ISL_2531495, EPI_ISL_2531496, EPI_ISL_2531497, EPI_ISL_2531498, EPI_ISL_2531499, EPI_ISL_2531500, EPI_ISL_2531501, EPI_ISL_2531502, EPI_ISL_2531503, EPI_ISL_2531504, EPI_ISL_2531505, EPI_ISL_2531506, EPI_ISL_2531507, EPI_ISL_2531508, EPI_ISL_2531509, EPI_ISL_2531510, EPI_ISL_2531511, EPI_ISL_2531512, EPI_ISL_2531513, EPI_ISL_2531514, EPI_ISL_2531515, EPI_ISL_2531516, EPI_ISL_2531517, EPI_ISL_2531518, EPI_ISL_2531519, EPI_ISL_2531520, EPI_ISL_2531521, EPI_ISL_2531522, EPI_ISL_2531523, EPI_ISL_2531524, EPI_ISL_2531525, EPI_ISL_2531526, EPI_ISL_2531527, EPI_ISL_2531528, EPI_ISL_2531529, EPI_ISL_2531530, EPI_ISL_2531531, EPI_ISL_2531532, EPI_ISL_2531533, EPI_ISL_2531534, EPI_ISL_2531535, EPI_ISL_2531536, EPI_ISL_2531537, EPI_ISL_2531538, EPI_ISL_2531539, EPI_ISL_2531540, EPI_ISL_2531541, EPI_ISL_2531542, EPI_ISL_2531543, EPI_ISL_2531544, EPI_ISL_2531545, EPI_ISL_2531546, EPI_ISL_2531547, EPI_ISL_2531548, EPI_ISL_2531549, EPI_ISL_2531550, EPI_ISL_2531551, EPI_ISL_2531552, EPI_ISL_2531553, EPI_ISL_2531554, EPI_ISL_2531555, EPI_ISL_2531556, EPI_ISL_2531557, EPI_ISL_2531558, EPI_ISL_2531559, EPI_ISL_2531560, EPI_ISL_2531561, EPI_ISL_2531562, EPI_ISL_2531563, EPI_ISL_2531564, EPI_ISL_2531565, EPI_ISL_2531566, EPI_ISL_2531567, EPI_ISL_2531568, EPI_ISL_2531569, EPI_ISL_2531570, EPI_ISL_2531571, EPI_ISL_2531572, EPI_ISL_2531573, EPI_ISL_2531574, EPI_ISL_2531575, EPI_ISL_2531576, EPI_ISL_2531577, EPI_ISL_2531578, EPI_ISL_2531579, EPI_ISL_2531580, EPI_ISL_2531581, EPI_ISL_2531582, EPI_ISL_2531583, EPI_ISL_2531584, EPI_ISL_2531585, EPI_ISL_2531586, EPI_ISL_2531587, EPI_ISL_2531588, EPI_ISL_2531589, EPI_ISL_2531590, EPI_ISL_2531591, EPI_ISL_2531592, EPI_ISL_2531593, EPI_ISL_2531594, EPI_ISL_2531595, EPI_ISL_2531596, EPI_ISL_2531597, EPI_ISL_2531598, EPI_ISL_2531599, EPI_ISL_2531600, EPI_ISL_2531601, EPI_ISL_2531602, EPI_ISL_2531603, EPI_ISL_2531604, EPI_ISL_2531605, EPI_ISL_2531606, EPI_ISL_2531607, EPI_ISL_2531608, EPI_ISL_2531609, EPI_ISL_2531610, EPI_ISL_2531611, EPI_ISL_2531612, EPI_ISL_2531613, EPI_ISL_2531614, EPI_ISL_2531615, EPI_ISL_2531616, EPI_ISL_2531617, EPI_ISL_2531618, EPI_ISL_2531619, EPI_ISL_2531620, EPI_ISL_2531621, EPI_ISL_2531622, EPI_ISL_2531623, EPI_ISL_2531624, EPI_ISL_2531625, EPI_ISL_2531626, EPI_ISL_2531627, EPI_ISL_2531628, EPI_ISL_2531629, EPI_ISL_2531630, EPI_ISL_2531631, EPI_ISL_2531632, EPI_ISL_2531633, EPI_ISL_2531634, EPI_ISL_2531635, EPI_ISL_2531636, EPI_ISL_2531637, EPI_ISL_2531638, EPI_ISL_2531639, EPI_ISL_2531640, EPI_ISL_2531641, EPI_ISL_2531642, EPI_ISL_2531643, EPI_ISL_2531644, EPI_ISL_2531645 |  |                                                                                                                                                                                        |                                                                                                                            |                                                                                                                                                                                                                                                                                                                                                                                                                                                                                                                                                                                                                                                                                                                                                                           |  |

|                                                                                                                                                                                                                                                                                                                                                                                                                                                                                                                                                                                                                                                                                                                                                                                                                                                                                                                                                                                                                                                                                                                                                                                                                                                                                                                                                             |                                                                                                                             |                                                                                                                                            |                                                                                                                                                                                                                                                                                                                                                                                                                                                                                                                                                                                                                                                                                                                                                                                                                                                                                                                                                                                                                                                                                                                                                                                  |
|-------------------------------------------------------------------------------------------------------------------------------------------------------------------------------------------------------------------------------------------------------------------------------------------------------------------------------------------------------------------------------------------------------------------------------------------------------------------------------------------------------------------------------------------------------------------------------------------------------------------------------------------------------------------------------------------------------------------------------------------------------------------------------------------------------------------------------------------------------------------------------------------------------------------------------------------------------------------------------------------------------------------------------------------------------------------------------------------------------------------------------------------------------------------------------------------------------------------------------------------------------------------------------------------------------------------------------------------------------------|-----------------------------------------------------------------------------------------------------------------------------|--------------------------------------------------------------------------------------------------------------------------------------------|----------------------------------------------------------------------------------------------------------------------------------------------------------------------------------------------------------------------------------------------------------------------------------------------------------------------------------------------------------------------------------------------------------------------------------------------------------------------------------------------------------------------------------------------------------------------------------------------------------------------------------------------------------------------------------------------------------------------------------------------------------------------------------------------------------------------------------------------------------------------------------------------------------------------------------------------------------------------------------------------------------------------------------------------------------------------------------------------------------------------------------------------------------------------------------|
| EPI_ISL_2801894                                                                                                                                                                                                                                                                                                                                                                                                                                                                                                                                                                                                                                                                                                                                                                                                                                                                                                                                                                                                                                                                                                                                                                                                                                                                                                                                             | Banteay Meanchey Regional Laboratory                                                                                        | Virology Unit, Institut Pasteur du Cambodge                                                                                                | Cecile Troupin; Chau Darapheak; Chin Savuth; Erik A Karlsson; Jurre Y Siegers; Kraing Sidonn; Leakhena Pum; Ly Sovann; Veesna Duong; Yi Sengdoeurn                                                                                                                                                                                                                                                                                                                                                                                                                                                                                                                                                                                                                                                                                                                                                                                                                                                                                                                                                                                                                               |
| EPI_ISL_2126019                                                                                                                                                                                                                                                                                                                                                                                                                                                                                                                                                                                                                                                                                                                                                                                                                                                                                                                                                                                                                                                                                                                                                                                                                                                                                                                                             | Barts Health NHS Trust                                                                                                      | COVID-19 Genomics UK (COG-UK) Consortium                                                                                                   | BROAD; Beatrix; CUTINO-MOGUEL; Claire; David; Dola; HARRINGTON; KELE; KULASEGARAN-SHYLINI; Maria-Teresa; OWOYEMI; Raghavendran                                                                                                                                                                                                                                                                                                                                                                                                                                                                                                                                                                                                                                                                                                                                                                                                                                                                                                                                                                                                                                                   |
| EPI_ISL_2406458                                                                                                                                                                                                                                                                                                                                                                                                                                                                                                                                                                                                                                                                                                                                                                                                                                                                                                                                                                                                                                                                                                                                                                                                                                                                                                                                             | Battambang Provincial Laboratory                                                                                            | Virology Unit, Institut Pasteur du Cambodge                                                                                                | Cecile Troupin; Chau Darapheak; Chin Savuth; Erik A Karlsson; Jurre Y Siegers; Kraing Sidonn; Leakhena Pum; Ly Sovann; Veesna Duong; Yi Sengdoeurn                                                                                                                                                                                                                                                                                                                                                                                                                                                                                                                                                                                                                                                                                                                                                                                                                                                                                                                                                                                                                               |
| EPI_ISL_1725322                                                                                                                                                                                                                                                                                                                                                                                                                                                                                                                                                                                                                                                                                                                                                                                                                                                                                                                                                                                                                                                                                                                                                                                                                                                                                                                                             | Bayerisches Landesamt für Gesundheit und Lebensmittelsicherheit (LGL)                                                       | Robert Koch Institute                                                                                                                      |                                                                                                                                                                                                                                                                                                                                                                                                                                                                                                                                                                                                                                                                                                                                                                                                                                                                                                                                                                                                                                                                                                                                                                                  |
| EPI_ISL_2260430, EPI_ISL_2260533, EPI_ISL_2260540, EPI_ISL_2260543, EPI_ISL_2262724, EPI_ISL_2262751, EPI_ISL_2262763                                                                                                                                                                                                                                                                                                                                                                                                                                                                                                                                                                                                                                                                                                                                                                                                                                                                                                                                                                                                                                                                                                                                                                                                                                       | Bayerisches Landesamt für Gesundheit und Lebensmittelsicherheit (LGL)                                                       | Robert Koch Institute                                                                                                                      |                                                                                                                                                                                                                                                                                                                                                                                                                                                                                                                                                                                                                                                                                                                                                                                                                                                                                                                                                                                                                                                                                                                                                                                  |
| see above                                                                                                                                                                                                                                                                                                                                                                                                                                                                                                                                                                                                                                                                                                                                                                                                                                                                                                                                                                                                                                                                                                                                                                                                                                                                                                                                                   |                                                                                                                             |                                                                                                                                            |                                                                                                                                                                                                                                                                                                                                                                                                                                                                                                                                                                                                                                                                                                                                                                                                                                                                                                                                                                                                                                                                                                                                                                                  |
| EPI_ISL_1833923, EPI_ISL_1833946, EPI_ISL_2128517                                                                                                                                                                                                                                                                                                                                                                                                                                                                                                                                                                                                                                                                                                                                                                                                                                                                                                                                                                                                                                                                                                                                                                                                                                                                                                           | Bioinformatics and Biostatistics Lab, Advanced Sequencing Facility                                                          | COVID-19 Genomics UK (COG-UK) Consortium                                                                                                   | Aengus Stewart; Chelsea Sawyer; Harshil Patel; Jerome Nicod; Laura Cubitt; Margaret Crawford                                                                                                                                                                                                                                                                                                                                                                                                                                                                                                                                                                                                                                                                                                                                                                                                                                                                                                                                                                                                                                                                                     |
| EPI_ISL_430005, EPI_ISL_430013, EPI_ISL_450189, EPI_ISL_635778, EPI_ISL_635779, EPI_ISL_635782, EPI_ISL_730263, EPI_ISL_730526, EPI_ISL_755254, EPI_ISL_878571                                                                                                                                                                                                                                                                                                                                                                                                                                                                                                                                                                                                                                                                                                                                                                                                                                                                                                                                                                                                                                                                                                                                                                                              |                                                                                                                             |                                                                                                                                            |                                                                                                                                                                                                                                                                                                                                                                                                                                                                                                                                                                                                                                                                                                                                                                                                                                                                                                                                                                                                                                                                                                                                                                                  |
| see above                                                                                                                                                                                                                                                                                                                                                                                                                                                                                                                                                                                                                                                                                                                                                                                                                                                                                                                                                                                                                                                                                                                                                                                                                                                                                                                                                   | Biolab Diagnostic Laboratories                                                                                              | Andersen lab at Scripps Research                                                                                                           | Ahmad Tibi; Amid Abdelnour with SEARCH Alliance San Diego; Issa Abu-Dayyeh; Lama Hussein; Lina Mohammad; Zein Naber                                                                                                                                                                                                                                                                                                                                                                                                                                                                                                                                                                                                                                                                                                                                                                                                                                                                                                                                                                                                                                                              |
| EPI_ISL_1404614, EPI_ISL_1406143, EPI_ISL_1406195, EPI_ISL_1822601, EPI_ISL_1823177, EPI_ISL_1824718, EPI_ISL_2105671, EPI_ISL_2105672, EPI_ISL_2105673, EPI_ISL_2105674, EPI_ISL_2617449, EPI_ISL_2617452, EPI_ISL_2617453, EPI_ISL_2617454, EPI_ISL_2617455, EPI_ISL_2617459                                                                                                                                                                                                                                                                                                                                                                                                                                                                                                                                                                                                                                                                                                                                                                                                                                                                                                                                                                                                                                                                              |                                                                                                                             |                                                                                                                                            |                                                                                                                                                                                                                                                                                                                                                                                                                                                                                                                                                                                                                                                                                                                                                                                                                                                                                                                                                                                                                                                                                                                                                                                  |
| see above                                                                                                                                                                                                                                                                                                                                                                                                                                                                                                                                                                                                                                                                                                                                                                                                                                                                                                                                                                                                                                                                                                                                                                                                                                                                                                                                                   | Biolab Diagnostic Laboratories                                                                                              | Biolab Diagnostic Laboratories                                                                                                             | Ahmad Tibi; Amid Abdelnour; Badia Sadeddin; Eiad Atwa; Issa Abu-Dayyeh; Lama Hussein; Shaima Ali; Shayma Ali                                                                                                                                                                                                                                                                                                                                                                                                                                                                                                                                                                                                                                                                                                                                                                                                                                                                                                                                                                                                                                                                     |
| EPI_ISL_1524334, EPI_ISL_1524342, EPI_ISL_1524343, EPI_ISL_1524362, EPI_ISL_1524367, EPI_ISL_1524368, EPI_ISL_1524370, EPI_ISL_2467913                                                                                                                                                                                                                                                                                                                                                                                                                                                                                                                                                                                                                                                                                                                                                                                                                                                                                                                                                                                                                                                                                                                                                                                                                      |                                                                                                                             |                                                                                                                                            |                                                                                                                                                                                                                                                                                                                                                                                                                                                                                                                                                                                                                                                                                                                                                                                                                                                                                                                                                                                                                                                                                                                                                                                  |
| see above                                                                                                                                                                                                                                                                                                                                                                                                                                                                                                                                                                                                                                                                                                                                                                                                                                                                                                                                                                                                                                                                                                                                                                                                                                                                                                                                                   | Biology Department, College of Science, Al Muthanna University and Public Health Laboratory, Al-Muthanna Health Directorate | Department of Virology, Faculty of Medicine, University of Helsinki, Helsinki, Finland                                                     | Alaa Hameed; Ali Jasim; Hussein Alburkat; Murad Munah; Nihad Al-Rashedi; Olli Vapalahti; Tarja Sironen; Teemu Smura                                                                                                                                                                                                                                                                                                                                                                                                                                                                                                                                                                                                                                                                                                                                                                                                                                                                                                                                                                                                                                                              |
| EPI_ISL_907084                                                                                                                                                                                                                                                                                                                                                                                                                                                                                                                                                                                                                                                                                                                                                                                                                                                                                                                                                                                                                                                                                                                                                                                                                                                                                                                                              | Biology, MCL                                                                                                                | Biology, MCL                                                                                                                               | A.F.; A.N.; Elhoseiny; Gad; M.D.; M.F.; M.G.; Seadawy; Shamel; Zekri                                                                                                                                                                                                                                                                                                                                                                                                                                                                                                                                                                                                                                                                                                                                                                                                                                                                                                                                                                                                                                                                                                             |
| EPI_ISL_1420654                                                                                                                                                                                                                                                                                                                                                                                                                                                                                                                                                                                                                                                                                                                                                                                                                                                                                                                                                                                                                                                                                                                                                                                                                                                                                                                                             | Biomedical Research Foundation of the Academy of Athens (BRFAA)                                                             | Greek Genome Center, Biomedical Research Foundation of the Academy of Athens (BRFAA)                                                       | Dimitrios Thanos; Emmanouil Athanasiadis; Ioannis Vatsellas; Katerina Zoi; Theodoros Loupis                                                                                                                                                                                                                                                                                                                                                                                                                                                                                                                                                                                                                                                                                                                                                                                                                                                                                                                                                                                                                                                                                      |
| EPI_ISL_516085                                                                                                                                                                                                                                                                                                                                                                                                                                                                                                                                                                                                                                                                                                                                                                                                                                                                                                                                                                                                                                                                                                                                                                                                                                                                                                                                              | Biomedical Sciences and Public Health, Polytechnic University of Marche                                                     | Biomedical Sciences and Public Health, Polytechnic University of Marche                                                                    | Alessandrini, F.; Bagnarelli, P.; Caucci, S.; Di Sante, L.; Melchionda, F.; Menzo, S.; Onofri, V.; Tagliabracchi, A.; Turchi, C.                                                                                                                                                                                                                                                                                                                                                                                                                                                                                                                                                                                                                                                                                                                                                                                                                                                                                                                                                                                                                                                 |
| EPI_ISL_1916570, EPI_ISL_1916696, EPI_ISL_1917032, EPI_ISL_2401459, EPI_ISL_2401565, EPI_ISL_2401612, EPI_ISL_2401729                                                                                                                                                                                                                                                                                                                                                                                                                                                                                                                                                                                                                                                                                                                                                                                                                                                                                                                                                                                                                                                                                                                                                                                                                                       |                                                                                                                             |                                                                                                                                            |                                                                                                                                                                                                                                                                                                                                                                                                                                                                                                                                                                                                                                                                                                                                                                                                                                                                                                                                                                                                                                                                                                                                                                                  |
| see above                                                                                                                                                                                                                                                                                                                                                                                                                                                                                                                                                                                                                                                                                                                                                                                                                                                                                                                                                                                                                                                                                                                                                                                                                                                                                                                                                   | BioneXt Lab                                                                                                                 | Laboratoire national de sante, Microbiology, Microbial Genomics Platform                                                                   | Anke Wienecke-Baldacchino; Catherine Ragimbeau; Fatu Djabi; Jessica Tapp; Lise Pignon; Raoul Salmon; Tamir Abdelrahman; Thibault Ferrandon                                                                                                                                                                                                                                                                                                                                                                                                                                                                                                                                                                                                                                                                                                                                                                                                                                                                                                                                                                                                                                       |
| EPI_ISL_1588696                                                                                                                                                                                                                                                                                                                                                                                                                                                                                                                                                                                                                                                                                                                                                                                                                                                                                                                                                                                                                                                                                                                                                                                                                                                                                                                                             | Biopická laboratoř s.r.o.                                                                                                   | Biopická laboratoř s.r.o.                                                                                                                  | Martina Putzová; Michaela Říhová; Nikola Bláh; Petr Šteiner; Silva Vondráková; Tomáš Vaněček                                                                                                                                                                                                                                                                                                                                                                                                                                                                                                                                                                                                                                                                                                                                                                                                                                                                                                                                                                                                                                                                                     |
| EPI_ISL_1970614, EPI_ISL_2227858                                                                                                                                                                                                                                                                                                                                                                                                                                                                                                                                                                                                                                                                                                                                                                                                                                                                                                                                                                                                                                                                                                                                                                                                                                                                                                                            | Biopická laboratoř, s.r.o.                                                                                                  | Biopická laboratoř, s.r.o.                                                                                                                 | Martina Putzová; Michaela Říhová; Nikola Bláh; Petr Šteiner; Silva Vondráková; Tomáš Vaněček                                                                                                                                                                                                                                                                                                                                                                                                                                                                                                                                                                                                                                                                                                                                                                                                                                                                                                                                                                                                                                                                                     |
| EPI_ISL_2108737, EPI_ISL_2108817, EPI_ISL_2120670, EPI_ISL_2120779, EPI_ISL_2121818, EPI_ISL_2122020, EPI_ISL_2125827, EPI_ISL_2260789, EPI_ISL_2470057, EPI_ISL_2636914, EPI_ISL_2762695                                                                                                                                                                                                                                                                                                                                                                                                                                                                                                                                                                                                                                                                                                                                                                                                                                                                                                                                                                                                                                                                                                                                                                   |                                                                                                                             |                                                                                                                                            |                                                                                                                                                                                                                                                                                                                                                                                                                                                                                                                                                                                                                                                                                                                                                                                                                                                                                                                                                                                                                                                                                                                                                                                  |
| see above                                                                                                                                                                                                                                                                                                                                                                                                                                                                                                                                                                                                                                                                                                                                                                                                                                                                                                                                                                                                                                                                                                                                                                                                                                                                                                                                                   | Bioscientia Labor Wermsdorf                                                                                                 | Robert Koch Institute                                                                                                                      |                                                                                                                                                                                                                                                                                                                                                                                                                                                                                                                                                                                                                                                                                                                                                                                                                                                                                                                                                                                                                                                                                                                                                                                  |
| EPI_ISL_2109742, EPI_ISL_2126150                                                                                                                                                                                                                                                                                                                                                                                                                                                                                                                                                                                                                                                                                                                                                                                                                                                                                                                                                                                                                                                                                                                                                                                                                                                                                                                            | Bioscientia MVZ Labor Karlsruhe GmbH                                                                                        | Robert Koch Institute                                                                                                                      |                                                                                                                                                                                                                                                                                                                                                                                                                                                                                                                                                                                                                                                                                                                                                                                                                                                                                                                                                                                                                                                                                                                                                                                  |
| EPI_ISL_1970089, EPI_ISL_1970092, EPI_ISL_1970094, EPI_ISL_1970095, EPI_ISL_1970099, EPI_ISL_1970100, EPI_ISL_1970101, EPI_ISL_1970102, EPI_ISL_1970103, EPI_ISL_1970105, EPI_ISL_1970106, EPI_ISL_1970108, EPI_ISL_1970109, EPI_ISL_1970110, EPI_ISL_1970111, EPI_ISL_1970112, EPI_ISL_1970114, EPI_ISL_1970133, EPI_ISL_1970134, EPI_ISL_1970135, EPI_ISL_1970136, EPI_ISL_1970149, EPI_ISL_1970153, EPI_ISL_1970154, EPI_ISL_1970155, EPI_ISL_1970157, EPI_ISL_1970158, EPI_ISL_1970159, EPI_ISL_1970160, EPI_ISL_1970163, EPI_ISL_1970164, EPI_ISL_1970168, EPI_ISL_1970169, EPI_ISL_1970170, EPI_ISL_1970171, EPI_ISL_1970172, EPI_ISL_1970179, EPI_ISL_1970211, EPI_ISL_1970215, EPI_ISL_1970221, EPI_ISL_1970223, EPI_ISL_1970224, EPI_ISL_1970237, EPI_ISL_1970238, EPI_ISL_1970239, EPI_ISL_1970241, EPI_ISL_1970242, EPI_ISL_1970243, EPI_ISL_1970247, EPI_ISL_1970249, EPI_ISL_1970250, EPI_ISL_1970267, EPI_ISL_1970269, EPI_ISL_1970274, EPI_ISL_1970276, EPI_ISL_1970277, EPI_ISL_1970278, EPI_ISL_1970279, EPI_ISL_1970281, EPI_ISL_1970286, EPI_ISL_1970288, EPI_ISL_1970310, EPI_ISL_1970313, EPI_ISL_1970314, EPI_ISL_1970318, EPI_ISL_1970319, EPI_ISL_1970323, EPI_ISL_1970324, EPI_ISL_1970327, EPI_ISL_1970328, EPI_ISL_1970332, EPI_ISL_1970333, EPI_ISL_1970334, EPI_ISL_1970335, EPI_ISL_1970336, EPI_ISL_1970337, EPI_ISL_1970340 |                                                                                                                             |                                                                                                                                            |                                                                                                                                                                                                                                                                                                                                                                                                                                                                                                                                                                                                                                                                                                                                                                                                                                                                                                                                                                                                                                                                                                                                                                                  |
| see above                                                                                                                                                                                                                                                                                                                                                                                                                                                                                                                                                                                                                                                                                                                                                                                                                                                                                                                                                                                                                                                                                                                                                                                                                                                                                                                                                   | Biotechnology Division, NCDC Delhi                                                                                          | NCDC Delhi, Biotechnology Division                                                                                                         | Hema Gogia; Hemlata Lal; Kalaiarasan Ponnusamy; Mahesh S Dhar; Manoj K Singh; Meena Datta; Partha Rakshit; Preeti Madan; Priyanka Singh; Radhakrishnan V. S; Robin Marwal; Sandhya Kabra; Sujeet K Singh; Uma Sharma                                                                                                                                                                                                                                                                                                                                                                                                                                                                                                                                                                                                                                                                                                                                                                                                                                                                                                                                                             |
| EPI_ISL_2360256, EPI_ISL_2360257                                                                                                                                                                                                                                                                                                                                                                                                                                                                                                                                                                                                                                                                                                                                                                                                                                                                                                                                                                                                                                                                                                                                                                                                                                                                                                                            | Boshehr University of Medical Sciences                                                                                      | National Influenza Center                                                                                                                  | A Nejati; F Ajaminejad; F Ajaminejad and T Mokhtari Azad; J Yavarian; K Sadeghi; N Ghavvami; N Ghavvami and T Mokhtari Azad; NZ Shafiei Jandaghi; V Salimi; Mostafa Salehi-Vaziri                                                                                                                                                                                                                                                                                                                                                                                                                                                                                                                                                                                                                                                                                                                                                                                                                                                                                                                                                                                                |
| EPI_ISL_1287760, EPI_ISL_1516828, EPI_ISL_1516836, EPI_ISL_1516855, EPI_ISL_1516862, EPI_ISL_1516877, EPI_ISL_2372279, EPI_ISL_2372295, EPI_ISL_2372297, EPI_ISL_2504073, EPI_ISL_2504074, EPI_ISL_2504086, EPI_ISL_2504089, EPI_ISL_2504090, EPI_ISL_2566206, EPI_ISL_2566207                                                                                                                                                                                                                                                                                                                                                                                                                                                                                                                                                                                                                                                                                                                                                                                                                                                                                                                                                                                                                                                                              |                                                                                                                             |                                                                                                                                            |                                                                                                                                                                                                                                                                                                                                                                                                                                                                                                                                                                                                                                                                                                                                                                                                                                                                                                                                                                                                                                                                                                                                                                                  |
| see above                                                                                                                                                                                                                                                                                                                                                                                                                                                                                                                                                                                                                                                                                                                                                                                                                                                                                                                                                                                                                                                                                                                                                                                                                                                                                                                                                   | Botswana Harvard HIV Reference Laboratory                                                                                   | Botswana Harvard HIV Reference Laboratory                                                                                                  | Boitumelo Zuze; Botshelo Radibe; David Lawrence; Dorcas Maruapula; Joseph Makhema; Keoratlle Ntshambiwa; Kgomoetso Moruisi; Legodile Kooepile; Madisa Mine; Modisa Motswaledi; Mosepele Mosepele; Ontlametse T. Bareng; Pamela Smith-Lawrence; Roger Shapiro; Shahin Lockman; Sikhulile Dorcas Maruapula; Sikhulile Moyo; Sikhulile Wonderful T. Choga; Simani Gaseitsiwe; Thongbotho Mphoyakgosi; Wonderful T. Choga                                                                                                                                                                                                                                                                                                                                                                                                                                                                                                                                                                                                                                                                                                                                                            |
| EPI_ISL_1000999, EPI_ISL_1001001, EPI_ISL_1001002, EPI_ISL_1034756, EPI_ISL_1034760                                                                                                                                                                                                                                                                                                                                                                                                                                                                                                                                                                                                                                                                                                                                                                                                                                                                                                                                                                                                                                                                                                                                                                                                                                                                         | Bundeswehr Institute of Microbiology                                                                                        | Bundeswehr Institute of Microbiology                                                                                                       | Alexandra Rehn; Enrico Georgi; Malena Bestehorn-Willmann; Markus Antwerpen; Mathias Walter; Mike Pillukat; Roman Wölff; Sabine Zange                                                                                                                                                                                                                                                                                                                                                                                                                                                                                                                                                                                                                                                                                                                                                                                                                                                                                                                                                                                                                                             |
| EPI_ISL_2131156                                                                                                                                                                                                                                                                                                                                                                                                                                                                                                                                                                                                                                                                                                                                                                                                                                                                                                                                                                                                                                                                                                                                                                                                                                                                                                                                             | Bundeswehrkrankenhaus Berlin                                                                                                | Bundeswehr Institute of Microbiology                                                                                                       |                                                                                                                                                                                                                                                                                                                                                                                                                                                                                                                                                                                                                                                                                                                                                                                                                                                                                                                                                                                                                                                                                                                                                                                  |
| EPI_ISL_1085408                                                                                                                                                                                                                                                                                                                                                                                                                                                                                                                                                                                                                                                                                                                                                                                                                                                                                                                                                                                                                                                                                                                                                                                                                                                                                                                                             | C.H du Cotentin                                                                                                             | Department of Virology, Henri Mondor University Hospital, Assistance Publique Hôpitaux de Paris, Université Paris-Est Créteil, INSERM U955 | Alexandra Rehn; Enrico Georgi; Malena Bestehorn-Willmann; Markus Antwerpen; Mathias Walter; Mike Pillukat; Roman Wölff; Sabine Zange                                                                                                                                                                                                                                                                                                                                                                                                                                                                                                                                                                                                                                                                                                                                                                                                                                                                                                                                                                                                                                             |
| EPI_ISL_2612795                                                                                                                                                                                                                                                                                                                                                                                                                                                                                                                                                                                                                                                                                                                                                                                                                                                                                                                                                                                                                                                                                                                                                                                                                                                                                                                                             | C.H.C MontLégia                                                                                                             | GIGA Medical Genomics                                                                                                                      | Alexandre Soulier; Christophe Rodriguez; Elisabeth Trawinski; Guillaume Gricourt; Jean-Michel Pawlotsky; Melissa N'Debi; Slim Fourati; Vanessa Demontant                                                                                                                                                                                                                                                                                                                                                                                                                                                                                                                                                                                                                                                                                                                                                                                                                                                                                                                                                                                                                         |
| EPI_ISL_2386977, EPI_ISL_2633577, EPI_ISL_2633652                                                                                                                                                                                                                                                                                                                                                                                                                                                                                                                                                                                                                                                                                                                                                                                                                                                                                                                                                                                                                                                                                                                                                                                                                                                                                                           | CENTOGENE Frankfurt Laboratory: Niederlassung Industriepark Höchst                                                          | Robert Koch Institute                                                                                                                      | Bouchra Boujemla; Cécile Meex; Keith Durkin; Maria Artesi; Marie-Pierre Hayette; Nathalie Renotte; Pierrette Melin; Raphaël Boreux; Sébastien Bontems; Vincent Bours                                                                                                                                                                                                                                                                                                                                                                                                                                                                                                                                                                                                                                                                                                                                                                                                                                                                                                                                                                                                             |
| EPI_ISL_1795170                                                                                                                                                                                                                                                                                                                                                                                                                                                                                                                                                                                                                                                                                                                                                                                                                                                                                                                                                                                                                                                                                                                                                                                                                                                                                                                                             | CENTRO DE SAUDE DE MARACAI                                                                                                  | Instituto Butantan / ESALQ-Piracicaba                                                                                                      | Antonio Jorge Martins; Bianca Cecchetto Carlos. Mendelics: Bibiana Santos; Claudia Renata dos Santos Barros; David Schlesinger. Hemocentro Ribeirão Preto: Simone Kashima; Debora Botequiao Moretti. Centro de Genômica Funcional da ESALQ: Luiz Lehmann Coutinho; Dimas Tadeu Covas; Elaine Cristina Marqueze; Elaine Vieira dos Santos; Elisângela Chicaroni Mattos; Erika Freitas; Evandra Strazza Rodrigues; Felipe Allan da Silva da Costa; Flavia Aburjaile; Guilherme Targino Valente; Heidge Fukumasu. USP-Botucatu: Rejane Maria Tommasini Grotto; Instituto Butantan: Alexander Roberto Precioso; Jayme A. Souza-Neto; Jessika Cristina Chagas Lesbon; José Salvatore Leister Patané; João Paulo Kitajima; Luiz Carlos Junior de Alcantara; Maria Carolina Elias; Marta Giovanetti; Patricia Akemi Assato; Rafael dos Santos Bezerra; Raquel de Lello Rocha Campos Cassano. NGS Soluções Genômicas: Pilar Drummond Sampaio Corrêa Mariani. FZEA-USP Pirassununga: Mirele Daiana Poleti; Raul Machado Neto; Ricardo Augusto Brassaloti; Ricardo Haddad; Rodrigo Tocantins Calado.; Sandra Coccuzzo Sampaio; Svetoslav Nanev Slavov; Vagner Fonseca; Vincent Louis Viala |
| EPI_ISL_2493539                                                                                                                                                                                                                                                                                                                                                                                                                                                                                                                                                                                                                                                                                                                                                                                                                                                                                                                                                                                                                                                                                                                                                                                                                                                                                                                                             | CENTRO DE SAUDE III BORBOREMA                                                                                               | Instituto Butantan                                                                                                                         | Antonio Jorge Martins; Claudia Renata dos Santos Barros; David Schlesinger; Debora Botequiao Moretti; Dimas Tadeu Covas; Elaine Cristina Marqueze; Elaine Vieira Santos; Evandra Strazza Rodrigues; Heidge Fukumasu; Jayme Augusto de Souza-Neto; José Salvatore Leister Patané; Luiz Alcantara; Luiz Lehmann Coutinho; Maria Carolina Elias; Maurício Lacerda Nogueira; Rafael dos Santos Bezerra; Raul Machado Neto; Rejane Maria Tommasini Grotto; Ricardo Haddad; Sandra Coccuzzo Sampaio Vessoni; Simone Kashima; Svetoslav Nanev Slavov; Vincent Louis Viala                                                                                                                                                                                                                                                                                                                                                                                                                                                                                                                                                                                                               |
| EPI_ISL_1795429                                                                                                                                                                                                                                                                                                                                                                                                                                                                                                                                                                                                                                                                                                                                                                                                                                                                                                                                                                                                                                                                                                                                                                                                                                                                                                                                             | CENTRO INTEGRADO DE SAUDE                                                                                                   | Instituto Butantan / ESALQ-Piracicaba                                                                                                      | Antonio Jorge Martins; Bianca Cecchetto Carlos. Mendelics: Bibiana Santos; Claudia Renata dos Santos Barros; David Schlesinger. Hemocentro Ribeirão Preto: Simone Kashima; Debora Botequiao Moretti. Centro de Genômica Funcional da ESALQ: Luiz Lehmann Coutinho; Dimas Tadeu Covas; Elaine Cristina Marqueze; Elaine Vieira dos Santos; Elisângela Chicaroni Mattos; Erika Freitas; Evandra Strazza Rodrigues; Felipe Allan da Silva da Costa; Flavia Aburjaile; Guilherme Targino Valente; Heidge Fukumasu. USP-Botucatu: Rejane Maria Tommasini Grotto; Instituto Butantan: Alexander Roberto Precioso; Jayme A. Souza-Neto; Jessika Cristina Chagas Lesbon; José Salvatore Leister Patané; João Paulo Kitajima; Luiz Carlos Junior de Alcantara; Maria Carolina Elias; Marta Giovanetti; Patricia Akemi Assato; Rafael dos Santos Bezerra; Raquel de Lello Rocha Campos Cassano. NGS Soluções Genômicas: Pilar Drummond Sampaio Corrêa Mariani. FZEA-USP Pirassununga: Mirele Daiana Poleti; Raul Machado Neto; Ricardo Augusto Brassaloti; Ricardo Haddad; Rodrigo Tocantins Calado.; Sandra Coccuzzo Sampaio; Svetoslav Nanev Slavov; Vagner Fonseca; Vincent Louis Viala |
| EPI_ISL_2714776                                                                                                                                                                                                                                                                                                                                                                                                                                                                                                                                                                                                                                                                                                                                                                                                                                                                                                                                                                                                                                                                                                                                                                                                                                                                                                                                             | CENTRUM VOOR MEDISCHE ANALYSE                                                                                               | Labo Klinische Biologie, UZA                                                                                                               | Basil Britto Xavier; Christine Lammens; Herman Goossens; Ines Verbesselt; Jasmine Coppens; Kathleen Holemans; Marie Le Mercier; Veerle Matheusseun                                                                                                                                                                                                                                                                                                                                                                                                                                                                                                                                                                                                                                                                                                                                                                                                                                                                                                                                                                                                                               |
| EPI_ISL_2226348                                                                                                                                                                                                                                                                                                                                                                                                                                                                                                                                                                                                                                                                                                                                                                                                                                                                                                                                                                                                                                                                                                                                                                                                                                                                                                                                             | CHU POITIERS                                                                                                                | CHU Poitiers                                                                                                                               | Agnes BEBY-DEFAUX; Birama N'DIAYE; Caroline MICHAUD; Magali GARCIA; Manon PRAT; Maxime PICHON; Nicolas LEVEQUE; Valentin BON-BARET                                                                                                                                                                                                                                                                                                                                                                                                                                                                                                                                                                                                                                                                                                                                                                                                                                                                                                                                                                                                                                               |
| EPI_ISL_2790247, EPI_ISL_2790248                                                                                                                                                                                                                                                                                                                                                                                                                                                                                                                                                                                                                                                                                                                                                                                                                                                                                                                                                                                                                                                                                                                                                                                                                                                                                                                            | CHWAPI - SITE NOTRE DAME                                                                                                    | Institut de Pathologie et Genetique (IPG)                                                                                                  | Jérémie Gras; Pascale Hilbert                                                                                                                                                                                                                                                                                                                                                                                                                                                                                                                                                                                                                                                                                                                                                                                                                                                                                                                                                                                                                                                                                                                                                    |
| EPI_ISL_1663304, EPI_ISL_1663307, EPI_ISL_1663308, EPI_ISL_1663312                                                                                                                                                                                                                                                                                                                                                                                                                                                                                                                                                                                                                                                                                                                                                                                                                                                                                                                                                                                                                                                                                                                                                                                                                                                                                          | CIIMS, Bilaspur, Chhattisgarh                                                                                               | Institute of Life Sciences - INSACOG                                                                                                       | Ajay Parida; Amol M. Kanampalliwar; Arup Ghosh; Atimukta Jha; INSACOG Consortium; Punit Prasad; Rajeeb Swain; Rupesh Dash; Safal Walia; Shifu Aggarwal; Sunil K. Raghav                                                                                                                                                                                                                                                                                                                                                                                                                                                                                                                                                                                                                                                                                                                                                                                                                                                                                                                                                                                                          |
| EPI_ISL_1303374                                                                                                                                                                                                                                                                                                                                                                                                                                                                                                                                                                                                                                                                                                                                                                                                                                                                                                                                                                                                                                                                                                                                                                                                                                                                                                                                             | CLINICA COLSANITAS CENTRAL DE REFERENCIA                                                                                    | Instituto Nacional de Salud- Dirección de Investigación en Salud Pública                                                                   | Carlos Franco-Muñoz; Carmen Osorio; Diana Malo; Diego A. Álvarez-Díaz; Diego Andrés Prada; Gerardo Santamaría; Hector Alejandro Ruiz-Moreno; Jhonnatan Reales-González; Juan Camilo Martínez; Julian Naizaque; Katherine Laiton-Donato; Liseth Pardo; Magdalena Wiesner; Marcela Mercado-Reyes; Maria T. Herrera-Sepúlveda; Marta Lopez Blanco; Martha Lucia Ospina Martinez; Sergio Gomez; Sheryll Corchuelo; Ángela Alarcon Cruz                                                                                                                                                                                                                                                                                                                                                                                                                                                                                                                                                                                                                                                                                                                                               |
| EPI_ISL_683392                                                                                                                                                                                                                                                                                                                                                                                                                                                                                                                                                                                                                                                                                                                                                                                                                                                                                                                                                                                                                                                                                                                                                                                                                                                                                                                                              | CNR Virus des Infections Respiratoires - France SUD                                                                         | CNR Virus des Infections Respiratoires - France SUD                                                                                        | Antonin Bal; Bruno Lina; Gregory Destras; Gwendolyne Burfin; Laurence Josset; Martine Valette; Quentin Semanas                                                                                                                                                                                                                                                                                                                                                                                                                                                                                                                                                                                                                                                                                                                                                                                                                                                                                                                                                                                                                                                                   |
| EPI_ISL_2484788                                                                                                                                                                                                                                                                                                                                                                                                                                                                                                                                                                                                                                                                                                                                                                                                                                                                                                                                                                                                                                                                                                                                                                                                                                                                                                                                             | COMMUNITY TESTING CENTRE                                                                                                    | Hong Kong Department of Health                                                                                                             | Alan K.L. Tsang; Dominic N.C. Tsang; Edman T.K. Lam; Gannon C.K. Mak; Ken H.L. Ng; Peter C.W. Yip; Peter K.C. Cheng; Rickjason C.W. Chan                                                                                                                                                                                                                                                                                                                                                                                                                                                                                                                                                                                                                                                                                                                                                                                                                                                                                                                                                                                                                                         |
| EPI_ISL_2227272                                                                                                                                                                                                                                                                                                                                                                                                                                                                                                                                                                                                                                                                                                                                                                                                                                                                                                                                                                                                                                                                                                                                                                                                                                                                                                                                             | COVID-19 National Reference Laboratory, Pasteur Institute of Iran                                                           | Genetics Research Center, University of Social Welfare and Rehabilitation Sciences                                                         | Hossein Najmabadi.; Kimia Kahrizi; Mahsa Tavakoli; Marzieh Mohseni; Mohammad Hassan Pouriaeyevali; Mostafa Salehi-Vaziri; Tahmineh Jalali; Zohreh Fattahi                                                                                                                                                                                                                                                                                                                                                                                                                                                                                                                                                                                                                                                                                                                                                                                                                                                                                                                                                                                                                        |
| EPI_ISL_2227271                                                                                                                                                                                                                                                                                                                                                                                                                                                                                                                                                                                                                                                                                                                                                                                                                                                                                                                                                                                                                                                                                                                                                                                                                                                                                                                                             | COVID-19 National Reference Laboratory, Pasteur Institute of Iran.                                                          | Genetics Research Center, University of Social Welfare and Rehabilitation Sciences                                                         | Hossein Najmabadi.; Kimia Kahrizi; Mahsa Tavakoli; Marzieh Mohseni; Mohammad Hassan Pouriaeyevali; Mostafa Salehi-Vaziri; Tahmineh Jalali; Zohreh Fattahi                                                                                                                                                                                                                                                                                                                                                                                                                                                                                                                                                                                                                                                                                                                                                                                                                                                                                                                                                                                                                        |
| EPI_ISL_2227204, EPI_ISL_2227268, EPI_ISL_2227269                                                                                                                                                                                                                                                                                                                                                                                                                                                                                                                                                                                                                                                                                                                                                                                                                                                                                                                                                                                                                                                                                                                                                                                                                                                                                                           | COVID-19 National Reference Laboratory, Pasteur Institute of Iran                                                           | Genetics Research Center, University of Social Welfare and Rehabilitation Sciences                                                         | Hossein Najmabadi.; Kimia Kahrizi; Mahsa Tavakoli; Marzieh Mohseni; Mohammad Hassan Pouriaeyevali; Mostafa Salehi-Vaziri; Tahmineh Jalali; Zohreh Fattahi                                                                                                                                                                                                                                                                                                                                                                                                                                                                                                                                                                                                                                                                                                                                                                                                                                                                                                                                                                                                                        |
| EPI_ISL_2227270                                                                                                                                                                                                                                                                                                                                                                                                                                                                                                                                                                                                                                                                                                                                                                                                                                                                                                                                                                                                                                                                                                                                                                                                                                                                                                                                             | COVID-19 National Reference Laboratory, Pasteur Institute of Iran.                                                          | Genetics Research Center, University of Social Welfare and Rehabilitation Sciences                                                         | Hossein Najmabadi.; Kimia Kahrizi; Mahsa Tavakoli; Marzieh Mohseni; Mohammad Hassan Pouriaeyevali; Mostafa Salehi-Vaziri; Tahmineh Jalali; Zohreh Fattahi                                                                                                                                                                                                                                                                                                                                                                                                                                                                                                                                                                                                                                                                                                                                                                                                                                                                                                                                                                                                                        |

|                                                                                                                                                                                                                                                                                                                                                                                                                                                                                                                                                                                                                                                                                                                                                                                                                                                                                                                                                                                                                                                                                                                                                                                                                                                                                                                                                                                                                                                                                                                                                                                                                                                                                                                                                                                                                                                                                                                                                                                                                                                                                                                                                                                                                                                                                                                                                                                                                                                                                                                                                                                                                                                                                                                                                                                                                                                                                                                                                                                                                                                                                                                                                                                                                                                                                                                                                                                                                                                                                                                                                                                                                                                                                                                                                                                                                                                                                                                                                                                                                                                                                                                                                                                                                                                                                                                                                                                                                                                                                                                                                                                                                                                                                                                                                                                                                                                                                                                                                                                                                                                                                                                                                                                                                                                                                                                                                                                                                                                                                                                                                                                                                                                                                                                                                                                                                                                                                                                                                                                                                                                                                                                                                                                                                                                                                                                                                                                                                                                                                                                                                                                                                                                                                                                                                                                                                                                                                                                                                                                                                                                                                                                                                                                                                                                                                                                                                                                                                                                                                                                                                                                                                                                                                                                                                                                                                                                                                                                                                                                                                                                                                                                                                                                                                                                                                                                                                                                                                                                                                                                                                                                                                                                                                                                                                                                                                                                                                                                                                                                                                                                                                                                                                                                                                                                                                                                                                                                                                                                                                                                                                                                                                                                                                                                                                                                                                                                                                                                                                                                                                                                                                                                                                                                                                                                                                                                                                                                                                                                                                                                                                                                                                                                                                                                                                                                                                                                                                                                                                                                                                                                                                                                                                                                                                                                                                                                                                                                                                                                                                                                                                                                                                                                                                                                                                                                                                                                                                                                                                                                                                                                                                                                                                                                                                                                                                                                                                                                                                                                                                                                                                                                                                                                                                                                                                                                                                                                                                                                                                                                                                                                                                                                                                                                                                                                                                                                                                                                                                                                                                                                                                                                                                                                                                                                                                                                                                                                                                                                                                                                                                                                                                                                                                                                                                                                                                                                                                                                                                                                                                                                                                                                                                                                                                                                                                                                                                                                                                                                                                                                                                                                                                                                                                                                                                                                                                                                                                                                                                                                                                                                                                                                                                                                                                                                                                                                      |                                                                                 |                                                                                 |                                                                                                                                                                                                                                                                                                                                                                                                                                                                                                                                                                                                                                                                                                                                                                                                                                                                                                                                                                                                                                                                                                                                                                                     |
|--------------------------------------------------------------------------------------------------------------------------------------------------------------------------------------------------------------------------------------------------------------------------------------------------------------------------------------------------------------------------------------------------------------------------------------------------------------------------------------------------------------------------------------------------------------------------------------------------------------------------------------------------------------------------------------------------------------------------------------------------------------------------------------------------------------------------------------------------------------------------------------------------------------------------------------------------------------------------------------------------------------------------------------------------------------------------------------------------------------------------------------------------------------------------------------------------------------------------------------------------------------------------------------------------------------------------------------------------------------------------------------------------------------------------------------------------------------------------------------------------------------------------------------------------------------------------------------------------------------------------------------------------------------------------------------------------------------------------------------------------------------------------------------------------------------------------------------------------------------------------------------------------------------------------------------------------------------------------------------------------------------------------------------------------------------------------------------------------------------------------------------------------------------------------------------------------------------------------------------------------------------------------------------------------------------------------------------------------------------------------------------------------------------------------------------------------------------------------------------------------------------------------------------------------------------------------------------------------------------------------------------------------------------------------------------------------------------------------------------------------------------------------------------------------------------------------------------------------------------------------------------------------------------------------------------------------------------------------------------------------------------------------------------------------------------------------------------------------------------------------------------------------------------------------------------------------------------------------------------------------------------------------------------------------------------------------------------------------------------------------------------------------------------------------------------------------------------------------------------------------------------------------------------------------------------------------------------------------------------------------------------------------------------------------------------------------------------------------------------------------------------------------------------------------------------------------------------------------------------------------------------------------------------------------------------------------------------------------------------------------------------------------------------------------------------------------------------------------------------------------------------------------------------------------------------------------------------------------------------------------------------------------------------------------------------------------------------------------------------------------------------------------------------------------------------------------------------------------------------------------------------------------------------------------------------------------------------------------------------------------------------------------------------------------------------------------------------------------------------------------------------------------------------------------------------------------------------------------------------------------------------------------------------------------------------------------------------------------------------------------------------------------------------------------------------------------------------------------------------------------------------------------------------------------------------------------------------------------------------------------------------------------------------------------------------------------------------------------------------------------------------------------------------------------------------------------------------------------------------------------------------------------------------------------------------------------------------------------------------------------------------------------------------------------------------------------------------------------------------------------------------------------------------------------------------------------------------------------------------------------------------------------------------------------------------------------------------------------------------------------------------------------------------------------------------------------------------------------------------------------------------------------------------------------------------------------------------------------------------------------------------------------------------------------------------------------------------------------------------------------------------------------------------------------------------------------------------------------------------------------------------------------------------------------------------------------------------------------------------------------------------------------------------------------------------------------------------------------------------------------------------------------------------------------------------------------------------------------------------------------------------------------------------------------------------------------------------------------------------------------------------------------------------------------------------------------------------------------------------------------------------------------------------------------------------------------------------------------------------------------------------------------------------------------------------------------------------------------------------------------------------------------------------------------------------------------------------------------------------------------------------------------------------------------------------------------------------------------------------------------------------------------------------------------------------------------------------------------------------------------------------------------------------------------------------------------------------------------------------------------------------------------------------------------------------------------------------------------------------------------------------------------------------------------------------------------------------------------------------------------------------------------------------------------------------------------------------------------------------------------------------------------------------------------------------------------------------------------------------------------------------------------------------------------------------------------------------------------------------------------------------------------------------------------------------------------------------------------------------------------------------------------------------------------------------------------------------------------------------------------------------------------------------------------------------------------------------------------------------------------------------------------------------------------------------------------------------------------------------------------------------------------------------------------------------------------------------------------------------------------------------------------------------------------------------------------------------------------------------------------------------------------------------------------------------------------------------------------------------------------------------------------------------------------------------------------------------------------------------------------------------------------------------------------------------------------------------------------------------------------------------------------------------------------------------------------------------------------------------------------------------------------------------------------------------------------------------------------------------------------------------------------------------------------------------------------------------------------------------------------------------------------------------------------------------------------------------------------------------------------------------------------------------------------------------------------------------------------------------------------------------------------------------------------------------------------------------------------------------------------------------------------------------------------------------------------------------------------------------------------------------------------------------------------------------------------------------------------------------------------------------------------------------------------------------------------------------------------------------------------------------------------------------------------------------------------------------------------------------------------------------------------------------------------------------------------------------------------------------------------------------------------------------------------------------------------------------------------------------------------------------------------------------------------------------------------------------------------------------------------------------------------------------------------------------------------------------------------------------------------------------------------------------------------------------------------------------------------------------------------------------------------------------------------------------------------------------------------------------------------------------------------------------------------------------------------------------------------------------------------------------------------------------------------------------------------------------------------------------------------------------------------------------------------------------------------------------------------------------------------------------------------------------------------------------------------------------------------------------------------------------------------------------------------------------------------------------------------------------------------------------------------------------------------------------------------------------------------------------------------------------------------------------------------------------------------------------------------------------------------------------------------------------------------------------------------------------------------------------------------------------------------------------------------------------------------------------------------------------------------------------------------------------------------------------------------------------------------------------------------------------------------------------------------------------------------------------------------------------------------------------------------------------------------------------------------------------------------------------------------------------------------------------------------------------------------------------------------------------------------------------------------------------------------------------------------------------------------------------------------------------------------------------------------------------------------------------------------------------------------------------------------------------------------------------------------------------------------------------------------------------------------------------------------------------------------------------------------------------------------------------------------------------------------------------------------------------------------------------------------------------------------------------------------------------------------------------------------------------------------------------------------------------------------------------------------------------------------------------------------------------------------------------------------------------------------------------------------------------------------------------------------------------------------------------------------------------------------------------------------------------------------------------------------------------------------------------------------------------------------------------------------------------------------------------------------------------------------------------------------------------------------------------------------------------------------------------------------------------------------------------------------------------------------------------------------------------------------------------------------------------------------------------------------------------------------------------------------------------------------------------------------------------------------------------------------------------------------------------------------------------------------------------------------------------------------------------------------------------------------------------------------------------------------------------------------------------------------------------------------------------------------------------------------------------------------------------------------------------------------------------------------------------------------------------------------------------------------------------------------------------------------------------------------------------------------------------------------------------------------------------------------------------|---------------------------------------------------------------------------------|---------------------------------------------------------------------------------|-------------------------------------------------------------------------------------------------------------------------------------------------------------------------------------------------------------------------------------------------------------------------------------------------------------------------------------------------------------------------------------------------------------------------------------------------------------------------------------------------------------------------------------------------------------------------------------------------------------------------------------------------------------------------------------------------------------------------------------------------------------------------------------------------------------------------------------------------------------------------------------------------------------------------------------------------------------------------------------------------------------------------------------------------------------------------------------------------------------------------------------------------------------------------------------|
| EPI_ISL_1942243                                                                                                                                                                                                                                                                                                                                                                                                                                                                                                                                                                                                                                                                                                                                                                                                                                                                                                                                                                                                                                                                                                                                                                                                                                                                                                                                                                                                                                                                                                                                                                                                                                                                                                                                                                                                                                                                                                                                                                                                                                                                                                                                                                                                                                                                                                                                                                                                                                                                                                                                                                                                                                                                                                                                                                                                                                                                                                                                                                                                                                                                                                                                                                                                                                                                                                                                                                                                                                                                                                                                                                                                                                                                                                                                                                                                                                                                                                                                                                                                                                                                                                                                                                                                                                                                                                                                                                                                                                                                                                                                                                                                                                                                                                                                                                                                                                                                                                                                                                                                                                                                                                                                                                                                                                                                                                                                                                                                                                                                                                                                                                                                                                                                                                                                                                                                                                                                                                                                                                                                                                                                                                                                                                                                                                                                                                                                                                                                                                                                                                                                                                                                                                                                                                                                                                                                                                                                                                                                                                                                                                                                                                                                                                                                                                                                                                                                                                                                                                                                                                                                                                                                                                                                                                                                                                                                                                                                                                                                                                                                                                                                                                                                                                                                                                                                                                                                                                                                                                                                                                                                                                                                                                                                                                                                                                                                                                                                                                                                                                                                                                                                                                                                                                                                                                                                                                                                                                                                                                                                                                                                                                                                                                                                                                                                                                                                                                                                                                                                                                                                                                                                                                                                                                                                                                                                                                                                                                                                                                                                                                                                                                                                                                                                                                                                                                                                                                                                                                                                                                                                                                                                                                                                                                                                                                                                                                                                                                                                                                                                                                                                                                                                                                                                                                                                                                                                                                                                                                                                                                                                                                                                                                                                                                                                                                                                                                                                                                                                                                                                                                                                                                                                                                                                                                                                                                                                                                                                                                                                                                                                                                                                                                                                                                                                                                                                                                                                                                                                                                                                                                                                                                                                                                                                                                                                                                                                                                                                                                                                                                                                                                                                                                                                                                                                                                                                                                                                                                                                                                                                                                                                                                                                                                                                                                                                                                                                                                                                                                                                                                                                                                                                                                                                                                                                                                                                                                                                                                                                                                                                                                                                                                                                                                                                                                                                                                      | CQRC_QUALITY CONTROL CHEMICAL BIOLOGICAL RISK_AOOR Villa Sofia Cervello Palermo | CQRC_QUALITY CONTROL CHEMICAL BIOLOGICAL RISK_AOOR Villa Sofia Cervello Palermo | Bonvissuto, M.; Brunacci, G.; Buffa, V.; Contino, F.; Di Chiara, V.; Di Gaudio, F.; Di Sclafani, A.; Lungari, A.; Orlando, V.; Seidita, G.; Todaro, I.                                                                                                                                                                                                                                                                                                                                                                                                                                                                                                                                                                                                                                                                                                                                                                                                                                                                                                                                                                                                                              |
| EPI_ISL_1795242                                                                                                                                                                                                                                                                                                                                                                                                                                                                                                                                                                                                                                                                                                                                                                                                                                                                                                                                                                                                                                                                                                                                                                                                                                                                                                                                                                                                                                                                                                                                                                                                                                                                                                                                                                                                                                                                                                                                                                                                                                                                                                                                                                                                                                                                                                                                                                                                                                                                                                                                                                                                                                                                                                                                                                                                                                                                                                                                                                                                                                                                                                                                                                                                                                                                                                                                                                                                                                                                                                                                                                                                                                                                                                                                                                                                                                                                                                                                                                                                                                                                                                                                                                                                                                                                                                                                                                                                                                                                                                                                                                                                                                                                                                                                                                                                                                                                                                                                                                                                                                                                                                                                                                                                                                                                                                                                                                                                                                                                                                                                                                                                                                                                                                                                                                                                                                                                                                                                                                                                                                                                                                                                                                                                                                                                                                                                                                                                                                                                                                                                                                                                                                                                                                                                                                                                                                                                                                                                                                                                                                                                                                                                                                                                                                                                                                                                                                                                                                                                                                                                                                                                                                                                                                                                                                                                                                                                                                                                                                                                                                                                                                                                                                                                                                                                                                                                                                                                                                                                                                                                                                                                                                                                                                                                                                                                                                                                                                                                                                                                                                                                                                                                                                                                                                                                                                                                                                                                                                                                                                                                                                                                                                                                                                                                                                                                                                                                                                                                                                                                                                                                                                                                                                                                                                                                                                                                                                                                                                                                                                                                                                                                                                                                                                                                                                                                                                                                                                                                                                                                                                                                                                                                                                                                                                                                                                                                                                                                                                                                                                                                                                                                                                                                                                                                                                                                                                                                                                                                                                                                                                                                                                                                                                                                                                                                                                                                                                                                                                                                                                                                                                                                                                                                                                                                                                                                                                                                                                                                                                                                                                                                                                                                                                                                                                                                                                                                                                                                                                                                                                                                                                                                                                                                                                                                                                                                                                                                                                                                                                                                                                                                                                                                                                                                                                                                                                                                                                                                                                                                                                                                                                                                                                                                                                                                                                                                                                                                                                                                                                                                                                                                                                                                                                                                                                                                                                                                                                                                                                                                                                                                                                                                                                                                                                                                                                      | CS DE URUPES                                                                    | Instituto Butantan / ESALQ-Piracicaba                                           | Antonio Jorge Martins; Bianca Cechetto Carlos. Mendelices; Bibiana Santos; Claudia Renata dos Santos Barros; David Schlesinger. Hemocentro Ribeirão Preto: Simone Kashima; Debora Botequilo Moretti. Centro de Genômica Funcional da ESALQ; Luiz Lehmann Coutinho; Dimas Tadeu Covas; Elaine Cristina Marqueze; Elaine Vieira dos Santos; Elisângela Chacirangim Mattos; Érika Freitas; Evandro Strazza Rodriguez; Felipe Allan da Silva da Costa; Flavia Aburjalje; Guilherme Targino Valente; Heidge Fukumatsu. USP-Botucatu: Rejane Maria Tommasini Grotto; Instituto Butantan: Alexander Roberto Precioso; Jayme A. Souza-Neto; Jessika Cristina Chagas Lesbon; José Salvatore Leister Patané; João Paulo Kitajima; Luiz Carlos Junior de Alcantara; Maria Carolina Elias; Marta Giovanetti; Patricia Akemi Assato; Rafael dos Santos Bezerra; Raquel de Lello Rocha Campos Cassano. NGS Soluções Genômicas: Pilar Drummond Sampaio Corrêa Mariani. FZEA-USP Pirassununga: Mirele Daiana Poleti; Raul Machado Neto; Ricardo Augusto Brassaloti; Ricardo Haddad; Rodrigo Tocantins Calado.; Sandra Coccuzzo Sampaio; Svetoslav Nanev Slavov; Vagner Fonseca; Vincent Louis Viala |
| EPI_ISL_2614645                                                                                                                                                                                                                                                                                                                                                                                                                                                                                                                                                                                                                                                                                                                                                                                                                                                                                                                                                                                                                                                                                                                                                                                                                                                                                                                                                                                                                                                                                                                                                                                                                                                                                                                                                                                                                                                                                                                                                                                                                                                                                                                                                                                                                                                                                                                                                                                                                                                                                                                                                                                                                                                                                                                                                                                                                                                                                                                                                                                                                                                                                                                                                                                                                                                                                                                                                                                                                                                                                                                                                                                                                                                                                                                                                                                                                                                                                                                                                                                                                                                                                                                                                                                                                                                                                                                                                                                                                                                                                                                                                                                                                                                                                                                                                                                                                                                                                                                                                                                                                                                                                                                                                                                                                                                                                                                                                                                                                                                                                                                                                                                                                                                                                                                                                                                                                                                                                                                                                                                                                                                                                                                                                                                                                                                                                                                                                                                                                                                                                                                                                                                                                                                                                                                                                                                                                                                                                                                                                                                                                                                                                                                                                                                                                                                                                                                                                                                                                                                                                                                                                                                                                                                                                                                                                                                                                                                                                                                                                                                                                                                                                                                                                                                                                                                                                                                                                                                                                                                                                                                                                                                                                                                                                                                                                                                                                                                                                                                                                                                                                                                                                                                                                                                                                                                                                                                                                                                                                                                                                                                                                                                                                                                                                                                                                                                                                                                                                                                                                                                                                                                                                                                                                                                                                                                                                                                                                                                                                                                                                                                                                                                                                                                                                                                                                                                                                                                                                                                                                                                                                                                                                                                                                                                                                                                                                                                                                                                                                                                                                                                                                                                                                                                                                                                                                                                                                                                                                                                                                                                                                                                                                                                                                                                                                                                                                                                                                                                                                                                                                                                                                                                                                                                                                                                                                                                                                                                                                                                                                                                                                                                                                                                                                                                                                                                                                                                                                                                                                                                                                                                                                                                                                                                                                                                                                                                                                                                                                                                                                                                                                                                                                                                                                                                                                                                                                                                                                                                                                                                                                                                                                                                                                                                                                                                                                                                                                                                                                                                                                                                                                                                                                                                                                                                                                                                                                                                                                                                                                                                                                                                                                                                                                                                                                                                                                                      | CSIR Institute of Himalayan Bioresource Technology                              | CSIR Institute of Himalayan Bioresource Technology                              | Narendra Tirdude; Ravi Kumar; Vishal Acharya                                                                                                                                                                                                                                                                                                                                                                                                                                                                                                                                                                                                                                                                                                                                                                                                                                                                                                                                                                                                                                                                                                                                        |
| EPI_ISL_539675                                                                                                                                                                                                                                                                                                                                                                                                                                                                                                                                                                                                                                                                                                                                                                                                                                                                                                                                                                                                                                                                                                                                                                                                                                                                                                                                                                                                                                                                                                                                                                                                                                                                                                                                                                                                                                                                                                                                                                                                                                                                                                                                                                                                                                                                                                                                                                                                                                                                                                                                                                                                                                                                                                                                                                                                                                                                                                                                                                                                                                                                                                                                                                                                                                                                                                                                                                                                                                                                                                                                                                                                                                                                                                                                                                                                                                                                                                                                                                                                                                                                                                                                                                                                                                                                                                                                                                                                                                                                                                                                                                                                                                                                                                                                                                                                                                                                                                                                                                                                                                                                                                                                                                                                                                                                                                                                                                                                                                                                                                                                                                                                                                                                                                                                                                                                                                                                                                                                                                                                                                                                                                                                                                                                                                                                                                                                                                                                                                                                                                                                                                                                                                                                                                                                                                                                                                                                                                                                                                                                                                                                                                                                                                                                                                                                                                                                                                                                                                                                                                                                                                                                                                                                                                                                                                                                                                                                                                                                                                                                                                                                                                                                                                                                                                                                                                                                                                                                                                                                                                                                                                                                                                                                                                                                                                                                                                                                                                                                                                                                                                                                                                                                                                                                                                                                                                                                                                                                                                                                                                                                                                                                                                                                                                                                                                                                                                                                                                                                                                                                                                                                                                                                                                                                                                                                                                                                                                                                                                                                                                                                                                                                                                                                                                                                                                                                                                                                                                                                                                                                                                                                                                                                                                                                                                                                                                                                                                                                                                                                                                                                                                                                                                                                                                                                                                                                                                                                                                                                                                                                                                                                                                                                                                                                                                                                                                                                                                                                                                                                                                                                                                                                                                                                                                                                                                                                                                                                                                                                                                                                                                                                                                                                                                                                                                                                                                                                                                                                                                                                                                                                                                                                                                                                                                                                                                                                                                                                                                                                                                                                                                                                                                                                                                                                                                                                                                                                                                                                                                                                                                                                                                                                                                                                                                                                                                                                                                                                                                                                                                                                                                                                                                                                                                                                                                                                                                                                                                                                                                                                                                                                                                                                                                                                                                                                                                       | CSIR-Centre for Cellular and Molecular Biology                                  | CSIR-Centre for Cellular and Molecular Biology                                  | Archana Bharadwaj Siva; Dhivya Vedagiri; Divya Gupta; Divya Tej Sowpati; Karthik Bharadwaj Tallapaka; Kezia J Ann; Krishnan Harinivas Harshan; Lamuk Zaveri; M Soujanya Reddy; Namami Gaur; Nikhil Hajirnis; Onkar Kulkarni; Payel Mukherjee; Pratheusa Macchia; Priya Singh; Purushotham Vaddadi; Radhika Khandelwal; Rakesh K Mishra; Roshan Maku Venkata; Sakshi Shamshahvi; Santosh Kumar Kuncha; Shaguftha Khan; Shemin Mansuri; Sofia Banu; Sonu Udai; Tulasi Nagabandi; Vishal Sah                                                                                                                                                                                                                                                                                                                                                                                                                                                                                                                                                                                                                                                                                           |
| EPI_ISL_1838398, EPI_ISL_1838426, EPI_ISL_1838463, EPI_ISL_1838549, EPI_ISL_1838603, EPI_ISL_1838604, EPI_ISL_1838606, EPI_ISL_1838607, EPI_ISL_1838608, EPI_ISL_1838609, EPI_ISL_1838612, EPI_ISL_1838613, EPI_ISL_1838614, EPI_ISL_1838616, EPI_ISL_1838642, EPI_ISL_1838645, EPI_ISL_1838646, EPI_ISL_1838647, EPI_ISL_1838648, EPI_ISL_1838649, EPI_ISL_1838650, EPI_ISL_1838651, EPI_ISL_1838656, EPI_ISL_1838659, EPI_ISL_1838660, EPI_ISL_1838671, EPI_ISL_1838672, EPI_ISL_1838673, EPI_ISL_1838674, EPI_ISL_1838675, EPI_ISL_1838676, EPI_ISL_1838677, EPI_ISL_1838678, EPI_ISL_1838679, EPI_ISL_1838680, EPI_ISL_1838681, EPI_ISL_1838682, EPI_ISL_1838683, EPI_ISL_1838684, EPI_ISL_1838685, EPI_ISL_1838686, EPI_ISL_1838687, EPI_ISL_1838688, EPI_ISL_1838689, EPI_ISL_1838690, EPI_ISL_1838691, EPI_ISL_1838692, EPI_ISL_1838693, EPI_ISL_1838694, EPI_ISL_1838695, EPI_ISL_1838696, EPI_ISL_1838697, EPI_ISL_1838698, EPI_ISL_1838699, EPI_ISL_1838700, EPI_ISL_1838701, EPI_ISL_1838702, EPI_ISL_1838703, EPI_ISL_1838704, EPI_ISL_1838705, EPI_ISL_1838706, EPI_ISL_1838707, EPI_ISL_1838708, EPI_ISL_1838709, EPI_ISL_1838710, EPI_ISL_1838711, EPI_ISL_1838712, EPI_ISL_1838713, EPI_ISL_1838714, EPI_ISL_1838715, EPI_ISL_1838716, EPI_ISL_1838717, EPI_ISL_1838718, EPI_ISL_1838719, EPI_ISL_1838720, EPI_ISL_1838721, EPI_ISL_1838722, EPI_ISL_1838723, EPI_ISL_1838724, EPI_ISL_1838725, EPI_ISL_1838726, EPI_ISL_1838727, EPI_ISL_1838728, EPI_ISL_1838729, EPI_ISL_1838730, EPI_ISL_1838731, EPI_ISL_1838732, EPI_ISL_1838733, EPI_ISL_1838734, EPI_ISL_1838735, EPI_ISL_1838736, EPI_ISL_1838737, EPI_ISL_1838738, EPI_ISL_1838739, EPI_ISL_1838740, EPI_ISL_1838741, EPI_ISL_1838742, EPI_ISL_1838743, EPI_ISL_1838744, EPI_ISL_1838745, EPI_ISL_1838746, EPI_ISL_1838747, EPI_ISL_1838748, EPI_ISL_1838749, EPI_ISL_1838750, EPI_ISL_1838751, EPI_ISL_1838752, EPI_ISL_1838753, EPI_ISL_1838754, EPI_ISL_1838755, EPI_ISL_1838756, EPI_ISL_1838757, EPI_ISL_1838758, EPI_ISL_1838759, EPI_ISL_1838760, EPI_ISL_1838761, EPI_ISL_1838762, EPI_ISL_1838763, EPI_ISL_1838764, EPI_ISL_1838765, EPI_ISL_1838766, EPI_ISL_1838767, EPI_ISL_1838768, EPI_ISL_1838769, EPI_ISL_1838770, EPI_ISL_1838771, EPI_ISL_1838772, EPI_ISL_1838773, EPI_ISL_1838774, EPI_ISL_1838775, EPI_ISL_1838776, EPI_ISL_1838777, EPI_ISL_1838778, EPI_ISL_1838779, EPI_ISL_1838780, EPI_ISL_1838781, EPI_ISL_1838782, EPI_ISL_1838783, EPI_ISL_1838784, EPI_ISL_1838785, EPI_ISL_1838786, EPI_ISL_1838787, EPI_ISL_1838788, EPI_ISL_1838789, EPI_ISL_1838790, EPI_ISL_1838791, EPI_ISL_1838792, EPI_ISL_1838793, EPI_ISL_1838794, EPI_ISL_1838795, EPI_ISL_1838796, EPI_ISL_1838797, EPI_ISL_1838798, EPI_ISL_1838799, EPI_ISL_1838800, EPI_ISL_1838801, EPI_ISL_1838802, EPI_ISL_1838803, EPI_ISL_1838804, EPI_ISL_1838805, EPI_ISL_1838806, EPI_ISL_1838807, EPI_ISL_1838808, EPI_ISL_1838809, EPI_ISL_1838810, EPI_ISL_1838811, EPI_ISL_1838812, EPI_ISL_1838813, EPI_ISL_1838814, EPI_ISL_1838815, EPI_ISL_1838816, EPI_ISL_1838817, EPI_ISL_1838818, EPI_ISL_1838819, EPI_ISL_1838820, EPI_ISL_1838821, EPI_ISL_1838822, EPI_ISL_1838823, EPI_ISL_1838824, EPI_ISL_1838825, EPI_ISL_1838826, EPI_ISL_1838827, EPI_ISL_1838828, EPI_ISL_1838829, EPI_ISL_1838830, EPI_ISL_1838831, EPI_ISL_1838832, EPI_ISL_1838833, EPI_ISL_1838834, EPI_ISL_1838835, EPI_ISL_1838836, EPI_ISL_1838837, EPI_ISL_1838838, EPI_ISL_1838839, EPI_ISL_1838840, EPI_ISL_1838841, EPI_ISL_1838842, EPI_ISL_1838843, EPI_ISL_1838844, EPI_ISL_1838845, EPI_ISL_1838846, EPI_ISL_1838847, EPI_ISL_1838848, EPI_ISL_1838849, EPI_ISL_1838850, EPI_ISL_1838851, EPI_ISL_1838852, EPI_ISL_1838853, EPI_ISL_1838854, EPI_ISL_1838855, EPI_ISL_1838856, EPI_ISL_1838857, EPI_ISL_1838858, EPI_ISL_1838859, EPI_ISL_1838860, EPI_ISL_1838861, EPI_ISL_1838862, EPI_ISL_1838863, EPI_ISL_1838864, EPI_ISL_1838865, EPI_ISL_1838866, EPI_ISL_1838867, EPI_ISL_1838868, EPI_ISL_1838869, EPI_ISL_1838870, EPI_ISL_1838871, EPI_ISL_1838872, EPI_ISL_1838873, EPI_ISL_1838874, EPI_ISL_1838875, EPI_ISL_1838876, EPI_ISL_1838877, EPI_ISL_1838878, EPI_ISL_1838879, EPI_ISL_1838880, EPI_ISL_1838881, EPI_ISL_1838882, EPI_ISL_1838883, EPI_ISL_1838884, EPI_ISL_1838885, EPI_ISL_1838886, EPI_ISL_1838887, EPI_ISL_1838888, EPI_ISL_1838889, EPI_ISL_1838890, EPI_ISL_1838891, EPI_ISL_1838892, EPI_ISL_1838893, EPI_ISL_1838894, EPI_ISL_1838895, EPI_ISL_1838896, EPI_ISL_1838897, EPI_ISL_1838898, EPI_ISL_1838899, EPI_ISL_1838900, EPI_ISL_1838901, EPI_ISL_1838902, EPI_ISL_1838903, EPI_ISL_1838904, EPI_ISL_1838905, EPI_ISL_1838906, EPI_ISL_1838907, EPI_ISL_1838908, EPI_ISL_1838909, EPI_ISL_1838910, EPI_ISL_1838911, EPI_ISL_1838912, EPI_ISL_1838913, EPI_ISL_1838914, EPI_ISL_1838915, EPI_ISL_1838916, EPI_ISL_1838917, EPI_ISL_1838918, EPI_ISL_1838919, EPI_ISL_1838920, EPI_ISL_1838921, EPI_ISL_1838922, EPI_ISL_1838923, EPI_ISL_1838924, EPI_ISL_1838925, EPI_ISL_1838926, EPI_ISL_1838927, EPI_ISL_1838928, EPI_ISL_1838929, EPI_ISL_1838930, EPI_ISL_1838931, EPI_ISL_1838932, EPI_ISL_1838933, EPI_ISL_1838934, EPI_ISL_1838935, EPI_ISL_1838936, EPI_ISL_1838937, EPI_ISL_1838938, EPI_ISL_1838939, EPI_ISL_1838940, EPI_ISL_1838941, EPI_ISL_1838942, EPI_ISL_1838943, EPI_ISL_1838944, EPI_ISL_1838945, EPI_ISL_1838946, EPI_ISL_1838947, EPI_ISL_1838948, EPI_ISL_1838949, EPI_ISL_1838950, EPI_ISL_1838951, EPI_ISL_1838952, EPI_ISL_1838953, EPI_ISL_1838954, EPI_ISL_1838955, EPI_ISL_1838956, EPI_ISL_1838957, EPI_ISL_1838958, EPI_ISL_1838959, EPI_ISL_1838960, EPI_ISL_1838961, EPI_ISL_1838962, EPI_ISL_1838963, EPI_ISL_1838964, EPI_ISL_1838965, EPI_ISL_1838966, EPI_ISL_1838967, EPI_ISL_1838968, EPI_ISL_1838969, EPI_ISL_1838970, EPI_ISL_1838971, EPI_ISL_1838972, EPI_ISL_1838973, EPI_ISL_1838974, EPI_ISL_1838975, EPI_ISL_1838976, EPI_ISL_1838977, EPI_ISL_1838978, EPI_ISL_1838979, EPI_ISL_1838980, EPI_ISL_1838981, EPI_ISL_1838982, EPI_ISL_1838983, EPI_ISL_1838984, EPI_ISL_1838985, EPI_ISL_1838986, EPI_ISL_1838987, EPI_ISL_1838988, EPI_ISL_1838989, EPI_ISL_1838990, EPI_ISL_1838991, EPI_ISL_1838992, EPI_ISL_1838993, EPI_ISL_1838994, EPI_ISL_1838995, EPI_ISL_1838996, EPI_ISL_1838997, EPI_ISL_1838998, EPI_ISL_1838999, EPI_ISL_1839000, EPI_ISL_1839001, EPI_ISL_1839002, EPI_ISL_1839003, EPI_ISL_1839004, EPI_ISL_1839005, EPI_ISL_1839006, EPI_ISL_1839007, EPI_ISL_1839008, EPI_ISL_1839009, EPI_ISL_1839010, EPI_ISL_1839011, EPI_ISL_1839012, EPI_ISL_1839013, EPI_ISL_1839014, EPI_ISL_1839015, EPI_ISL_1839016, EPI_ISL_1839017, EPI_ISL_1839018, EPI_ISL_1839019, EPI_ISL_1839020, EPI_ISL_1839021, EPI_ISL_1839022, EPI_ISL_1839023, EPI_ISL_1839024, EPI_ISL_1839025, EPI_ISL_1839026, EPI_ISL_1839027, EPI_ISL_1839028, EPI_ISL_1839029, EPI_ISL_1839030, EPI_ISL_1839031, EPI_ISL_1839032, EPI_ISL_1839033, EPI_ISL_1839034, EPI_ISL_1839035, EPI_ISL_1839036, EPI_ISL_1839037, EPI_ISL_1839038, EPI_ISL_1839039, EPI_ISL_1839040, EPI_ISL_1839041, EPI_ISL_1839042, EPI_ISL_1839043, EPI_ISL_1839044, EPI_ISL_1839045, EPI_ISL_1839046, EPI_ISL_1839047, EPI_ISL_1839048, EPI_ISL_1839049, EPI_ISL_1839050, EPI_ISL_1839051, EPI_ISL_1839052, EPI_ISL_1839053, EPI_ISL_1839054, EPI_ISL_1839055, EPI_ISL_1839056, EPI_ISL_1839057, EPI_ISL_1839058, EPI_ISL_1839059, EPI_ISL_1839060, EPI_ISL_1839061, EPI_ISL_1839062, EPI_ISL_1839063, EPI_ISL_1839064, EPI_ISL_1839065, EPI_ISL_1839066, EPI_ISL_1839067, EPI_ISL_1839068, EPI_ISL_1839069, EPI_ISL_1839070, EPI_ISL_1839071, EPI_ISL_1839072, EPI_ISL_1839073, EPI_ISL_1839074, EPI_ISL_1839075, EPI_ISL_1839076, EPI_ISL_1839077, EPI_ISL_1839078, EPI_ISL_1839079, EPI_ISL_1839080, EPI_ISL_1839081, EPI_ISL_1839082, EPI_ISL_1839083, EPI_ISL_1839084, EPI_ISL_1839085, EPI_ISL_1839086, EPI_ISL_1839087, EPI_ISL_1839088, EPI_ISL_1839089, EPI_ISL_1839090, EPI_ISL_1839091, EPI_ISL_1839092, EPI_ISL_1839093, EPI_ISL_1839094, EPI_ISL_1839095, EPI_ISL_1839096, EPI_ISL_1839097, EPI_ISL_1839098, EPI_ISL_1839099, EPI_ISL_1839100, EPI_ISL_1839101, EPI_ISL_1839102, EPI_ISL_1839103, EPI_ISL_1839104, EPI_ISL_1839105, EPI_ISL_1839106, EPI_ISL_1839107, EPI_ISL_1839108, EPI_ISL_1839109, EPI_ISL_1839110, EPI_ISL_1839111, EPI_ISL_1839112, EPI_ISL_1839113, EPI_ISL_1839114, EPI_ISL_1839115, EPI_ISL_1839116, EPI_ISL_1839117, EPI_ISL_1839118, EPI_ISL_1839119, EPI_ISL_1839120, EPI_ISL_1839121, EPI_ISL_1839122, EPI_ISL_1839123, EPI_ISL_1839124, EPI_ISL_1839125, EPI_ISL_1839126, EPI_ISL_1839127, EPI_ISL_1839128, EPI_ISL_1839129, EPI_ISL_1839130, EPI_ISL_1839131, EPI_ISL_1839132, EPI_ISL_1839133, EPI_ISL_1839134, EPI_ISL_1839135, EPI_ISL_1839136, EPI_ISL_1839137, EPI_ISL_1839138, EPI_ISL_1839139, EPI_ISL_1839140, EPI_ISL_1839141, EPI_ISL_1839142, EPI_ISL_1839143, EPI_ISL_1839144, EPI_ISL_1839145, EPI_ISL_1839146, EPI_ISL_1839147, EPI_ISL_1839148, EPI_ISL_1839149, EPI_ISL_1839150, EPI_ISL_1839151, EPI_ISL_1839152, EPI_ISL_1839153, EPI_ISL_1839154, EPI_ISL_1839155, EPI_ISL_1839156, EPI_ISL_1839157, EPI_ISL_1839158, EPI_ISL_1839159, EPI_ISL_1839160, EPI_ISL_1839161, EPI_ISL_1839162, EPI_ISL_1839163, EPI_ISL_1839164, EPI_ISL_1839165, EPI_ISL_1839166, EPI_ISL_1839167, EPI_ISL_1839168, EPI_ISL_1839169, EPI_ISL_1839170, EPI_ISL_1839171, EPI_ISL_1839172, EPI_ISL_1839173, EPI_ISL_1839174, EPI_ISL_1839175, EPI_ISL_1839176, EPI_ISL_1839177, EPI_ISL_1839178, EPI_ISL_1839179, EPI_ISL_1839180, EPI_ISL_1839181, EPI_ISL_1839182, EPI_ISL_1839183, EPI_ISL_1839184, EPI_ISL_1839185, EPI_ISL_1839186, EPI_ISL_1839187, EPI_ISL_1839188, EPI_ISL_1839189, EPI_ISL_1839190, EPI_ISL_1839191, EPI_ISL_1839192, EPI_ISL_1839193, EPI_ISL_1839194, EPI_ISL_1839195, EPI_ISL_1839196, EPI_ISL_1839197, EPI_ISL_1839198, EPI_ISL_1839199, EPI_ISL_1839200, EPI_ISL_1839201, EPI_ISL_1839202, EPI_ISL_1839203, EPI_ISL_1839204, EPI_ISL_1839205, EPI_ISL_1839206, EPI_ISL_1839207, EPI_ISL_1839208, EPI_ISL_1839209, EPI_ISL_1839210, EPI_ISL_1839211, EPI_ISL_1839212, EPI_ISL_1839213, EPI_ISL_1839214, EPI_ISL_1839215, EPI_ISL_1839216, EPI_ISL_1839217, EPI_ISL_1839218, EPI_ISL_1839219, EPI_ISL_1839220, EPI_ISL_1839221, EPI_ISL_1839222, EPI_ISL_1839223, EPI_ISL_1839224, EPI_ISL_1839225, EPI_ISL_1839226, EPI_ISL_1839227, EPI_ISL_1839228, EPI_ISL_1839229, EPI_ISL_1839230, EPI_ISL_1839231, EPI_ISL_1839232, EPI_ISL_1839233, EPI_ISL_1839234, EPI_ISL_1839235, EPI_ISL_1839236, EPI_ISL_1839237, EPI_ISL_1839238, EPI_ISL_1839239, EPI_ISL_1839240, EPI_ISL_1839241, EPI_ISL_1839242, EPI_ISL_1839243, EPI_ISL_1839244, EPI_ISL_1839245, EPI_ISL_1839246, EPI_ISL_1839247, EPI_ISL_1839248, EPI_ISL_1839249, EPI_ISL_1839250, EPI_ISL_1839251, EPI_ISL_1839252, EPI_ISL_1839253, EPI_ISL_1839254, EPI_ISL_1839255, EPI_ISL_1839256, EPI_ISL_1839257, EPI_ISL_1839258, EPI_ISL_1839259, EPI_ISL_1839260, EPI_ISL_1839261, EPI_ISL_1839262, EPI_ISL_1839263, EPI_ISL_1839264, EPI_ISL_1839265, EPI_ISL_1839266, EPI_ISL_1839267, EPI_ISL_1839268, EPI_ISL_1839269, EPI_ISL_1839270, EPI_ISL_1839271, EPI_ISL_1839272, EPI_ISL_1839273, EPI_ISL_1839274, EPI_ISL_1839275, EPI_ISL_1839276, EPI_ISL_1839277, EPI_ISL_1839278, EPI_ISL_1839279, EPI_ISL_1839280, EPI_ISL_1839281, EPI_ISL_1839282, EPI_ISL_1839283, EPI_ISL_1839284, EPI_ISL_1839285, EPI_ISL_1839286, EPI_ISL_1839287, EPI_ISL_1839288, EPI_ISL_1839289, EPI_ISL_1839290, EPI_ISL_1839291, EPI_ISL_1839292, EPI_ISL_1839293, EPI_ISL_1839294, EPI_ISL_1839295, EPI_ISL_1839296, EPI_ISL_1839297, EPI_ISL_1839298, EPI_ISL_1839299, EPI_ISL_1839300, EPI_ISL_1839301, EPI_ISL_1839302, EPI_ISL_1839303, EPI_ISL_1839304, EPI_ISL_1839305, EPI_ISL_1839306, EPI_ISL_1839307, EPI_ISL_1839308, EPI_ISL_1839309, EPI_ISL_1839310, EPI_ISL_1839311, EPI_ISL_1839312, EPI_ISL_1839313, EPI_ISL_1839314, EPI_ISL_1839315, EPI_ISL_1839316, EPI_ISL_1839317, EPI_ISL_1839318, EPI_ISL_1839319, EPI_ISL_1839320, EPI_ISL_1839321, EPI_ISL_1839322, EPI_ISL_1839323, EPI_ISL_1839324, EPI_ISL_1839325, EPI_ISL_1839326, EPI_ISL_1839327, EPI_ISL_1839328, EPI_ISL_1839329, EPI_ISL_1839330, EPI_ISL_1839331, EPI_ISL_1839332, EPI_ISL_1839333, EPI_ISL_1839334, EPI_ISL_1839335, EPI_ISL_1839336, EPI_ISL_1839337, EPI_ISL_1839338, EPI_ISL_1839339, EPI_ISL_1839340, EPI_ISL_1839341, EPI_ISL_1839342, EPI_ISL_1839343, EPI_ISL_1839344, EPI_ISL_1839345, EPI_ISL_1839346, EPI_ISL_1839347, EPI_ISL_1839348, EPI_ISL_1839349, EPI_ISL_1839350, EPI_ISL_1839351, EPI_ISL_1839352, EPI_ISL_1839353, EPI_ISL_1839354, EPI_ISL_1839355, EPI_ISL_1839356, EPI_ISL_1839357, EPI_ISL_1839358, EPI_ISL_1839359, EPI_ISL_1839360, EPI_ISL_1839361, EPI_ISL_1839362, EPI_ISL_1839363, EPI_ISL_1839364, EPI_ISL_1839365, EPI_ISL_1839366, EPI_ISL_1839367, EPI_ISL_1839368, EPI_ISL_1839369, EPI_ISL_1839370, EPI_ISL_1839371, EPI_ISL_1839372, EPI_ISL_1839373, EPI_ISL_1839374, EPI_ISL_1839375, EPI_ISL_1839376, EPI_ISL_1839377, EPI_ISL_1839378, EPI_ISL_1839379, EPI_ISL_1839380, EPI_ISL_1839381, EPI_ISL_1839382, EPI_ISL_1839383, EPI_ISL_1839384, EPI_ISL_1839385, EPI_ISL_1839386, EPI_ISL_1839387, EPI_ISL_1839388, EPI_ISL_1839389, EPI_ISL_1839390, EPI_ISL_1839391, EPI_ISL_1839392, EPI_ISL_1839393, EPI_ISL_1839394, EPI_ISL_1839395, EPI_ISL_1839396, EPI_ISL_1839397, EPI_ISL_1839398, EPI_ISL_1839399, EPI_ISL_1839400, EPI_ISL_1839401, EPI_ISL_1839402, EPI_ISL_1839403, EPI_ISL_1839404, EPI_ISL_1839405, EPI_ISL_1839406, EPI_ISL_1839407, EPI_ISL_1839408, EPI_ISL_1839409, EPI_ISL_1839410, EPI_ISL_1839411, EPI_ISL_1839412, EPI_ISL_1839413, EPI_ISL_1839414, EPI_ISL_1839415, EPI_ISL_1839416, EPI_ISL_1839417, EPI_ISL_1839418, EPI_ISL_1839419, EPI_ISL_1839420, EPI_ISL_1839421, EPI_ISL_1839422, EPI_ISL_1839423, EPI_ISL_1839424, EPI_ISL_1839425, EPI_ISL_1839426, EPI_ISL_1839427, EPI_ISL_1839428, EPI_ISL_1839429, EPI_ISL_1839430, EPI_ISL_1839431, EPI_ISL_1839432, EPI_ISL_1839433, EPI_ISL_1839434, EPI_ISL_1839435, EPI_ISL_1839436, EPI_ISL_1839437, EPI_ISL_1839438, EPI_ISL_1839439, EPI_ISL_1839440, EPI_ISL_1839441, EPI_ISL_1839442, EPI_ISL_1839443, EPI_ISL_1839444, EPI_ISL_1839445, EPI_ISL_1839446, EPI_ISL_1839447, EPI_ISL_1839448, EPI_ISL_1839449, EPI_ISL_1839450, EPI_ISL_1839451, EPI_ISL_1839452, EPI_ISL_1839453, EPI_ISL_1839454, EPI_ISL_1839455, EPI_ISL_1839456, EPI_ISL_1839457, EPI_ISL_1839458, EPI_ISL_1839459, EPI_ISL_1839460, EPI_ISL_1839461, EPI_ISL_1839462, EPI_ISL_1839463, EPI_ISL_1839464, EPI_ISL_1839465, EPI_ISL_1839466, EPI_ISL_1839467, EPI_ISL_1839468, EPI_ISL_1839469, EPI_ISL_1839470, EPI_ISL_1839471, EPI_ISL_1839472, EPI_ISL_1839473, EPI_ISL_1839474, EPI_ISL_1839475, EPI_ISL_1839476, EPI_ISL_1839477, EPI_ISL_1839478, EPI_ISL_1839479, EPI_ISL_1839480, EPI_ISL_1839481, EPI_ISL_1839482, EPI_ISL_1839483, EPI_ISL_1839484, EPI_ISL_1839485, EPI_ISL_1839486, EPI_ISL_1839487, EPI_ISL_1839488, EPI_ISL_1839489, EPI_ISL_1839490, EPI_ISL_1839491, EPI_ISL_1839492, EPI_ISL_1839493, EPI_ISL_1839494, EPI_ISL_1839495, EPI_ISL_1839496, EPI_ISL_1839497, EPI_ISL_1839498, EPI_ISL_1839499, EPI_ISL_1839500, EPI_ISL_1839501, EPI_ISL_1839502, EPI_ISL_1839503, EPI_ISL_1839504, EPI_ISL_1839505, EPI_ISL_1839506, EPI_ISL_1839507, EPI_ISL_1839508, EPI_ISL_1839509, EPI_ISL_1839510, EPI_ISL_1839511, EPI_ISL_1839512, EPI_ISL_1839513, EPI_ISL_1839514, EPI_ISL_1839515, EPI_ISL_1839516, EPI_ISL_1839517, EPI_ISL_1839518, EPI_ISL_1839519, EPI_ISL_1839520, EPI_ISL_1839521, EPI_ISL_1839522, EPI_ISL_1839523, EPI_ISL_1839524, EPI_ISL_1839525, EPI_ISL_1839526, EPI_ISL_1839527, EPI_ISL_1839528, EPI_ISL_1839529, EPI_ISL_1839530, EPI_ISL_1839531, EPI_ISL_1839532, EPI_ISL_1839533, EPI_ISL_1839534, EPI_ISL_1839535, EPI_ISL_1839536, EPI_ISL_1 |                                                                                 |                                                                                 |                                                                                                                                                                                                                                                                                                                                                                                                                                                                                                                                                                                                                                                                                                                                                                                                                                                                                                                                                                                                                                                                                                                                                                                     |

|                                                                                                                                                                                                                                                                                                                                                                                                                                                                                                                                                                                                                                                                                                                                                                                                                                                                                                                                                                                                                                                                                                                                                                                   |                                                                                                                                                    |                                                                                                                                                                                                                                                         |                                                                                                                                                                                                                                                                                                                                                                                                                                                                                                                                                                                                                                                                                                                                      |  |
|-----------------------------------------------------------------------------------------------------------------------------------------------------------------------------------------------------------------------------------------------------------------------------------------------------------------------------------------------------------------------------------------------------------------------------------------------------------------------------------------------------------------------------------------------------------------------------------------------------------------------------------------------------------------------------------------------------------------------------------------------------------------------------------------------------------------------------------------------------------------------------------------------------------------------------------------------------------------------------------------------------------------------------------------------------------------------------------------------------------------------------------------------------------------------------------|----------------------------------------------------------------------------------------------------------------------------------------------------|---------------------------------------------------------------------------------------------------------------------------------------------------------------------------------------------------------------------------------------------------------|--------------------------------------------------------------------------------------------------------------------------------------------------------------------------------------------------------------------------------------------------------------------------------------------------------------------------------------------------------------------------------------------------------------------------------------------------------------------------------------------------------------------------------------------------------------------------------------------------------------------------------------------------------------------------------------------------------------------------------------|--|
| EPI_ISL_408976, EPI_ISL_412975, EPI_ISL_413214                                                                                                                                                                                                                                                                                                                                                                                                                                                                                                                                                                                                                                                                                                                                                                                                                                                                                                                                                                                                                                                                                                                                    | Centre for Infectious Diseases and Microbiology Laboratory Services                                                                                | NSW Health Pathology - Institute of Clinical Pathology and Medical Research; Westmead Hospital; University of Sydney                                                                                                                                    | Carter I; Chen SC; Eden J-S; Holmes EC; Kok J and Dwyer DE for the 2019-nCoV Study Group; Kok J and Dwyer DE for the 2019-nCoV Study Group*; Maddocks S; O'Sullivan MV; Rahman H; Rockett R; Sadsad R; Sintchenko V                                                                                                                                                                                                                                                                                                                                                                                                                                                                                                                  |  |
| EPI_ISL_837555, EPI_ISL_837560, EPI_ISL_837571, EPI_ISL_837572, EPI_ISL_837573, EPI_ISL_837576, EPI_ISL_837577, EPI_ISL_837578                                                                                                                                                                                                                                                                                                                                                                                                                                                                                                                                                                                                                                                                                                                                                                                                                                                                                                                                                                                                                                                    |                                                                                                                                                    |                                                                                                                                                                                                                                                         |                                                                                                                                                                                                                                                                                                                                                                                                                                                                                                                                                                                                                                                                                                                                      |  |
| see above                                                                                                                                                                                                                                                                                                                                                                                                                                                                                                                                                                                                                                                                                                                                                                                                                                                                                                                                                                                                                                                                                                                                                                         | Centro Nacional de Enfermedades Tropicales (CENETROP)                                                                                              | Laboratory of Respiratory Viruses and Measles, Oswaldo Cruz Institute, FIOCRUZ                                                                                                                                                                          | Ana Carolina Mendonca; Anna Carolina Paixao; Cinthia Avila; Fernando Motta; Luciana Appolinario; Marilda Siqueira on behalf of the Fiocruz COVID-19 Genomic Surveillance Network; Paola Resende; Roxana Loayza                                                                                                                                                                                                                                                                                                                                                                                                                                                                                                                       |  |
| EPI_ISL_2274030, EPI_ISL_2274031, EPI_ISL_2274032, EPI_ISL_2274033, EPI_ISL_2274037, EPI_ISL_2274038, EPI_ISL_2274039                                                                                                                                                                                                                                                                                                                                                                                                                                                                                                                                                                                                                                                                                                                                                                                                                                                                                                                                                                                                                                                             |                                                                                                                                                    |                                                                                                                                                                                                                                                         |                                                                                                                                                                                                                                                                                                                                                                                                                                                                                                                                                                                                                                                                                                                                      |  |
| see above                                                                                                                                                                                                                                                                                                                                                                                                                                                                                                                                                                                                                                                                                                                                                                                                                                                                                                                                                                                                                                                                                                                                                                         | Centro Nacional de Enfermedades Tropicales (CENETROP)                                                                                              | Laboratory of Respiratory Viruses and Measles, Oswaldo Cruz Institute, FIOCRUZ                                                                                                                                                                          | Alice Sampaio Rocha; Ana Carolina Mendonca; Anna Carolina Paixao; Cinthia Avila; Elisa Cavalcante Pereira; Fernando Motta; Luciana Appolinario; Marilda Siqueira on behalf of the Fiocruz COVID-19 Genomic Surveillance Network; Paola Resende; Renata Serrano Lopes; Roxana Loayza; Taina Venas                                                                                                                                                                                                                                                                                                                                                                                                                                     |  |
| EPI_ISL_2339879, EPI_ISL_2339896, EPI_ISL_2339897, EPI_ISL_2339909                                                                                                                                                                                                                                                                                                                                                                                                                                                                                                                                                                                                                                                                                                                                                                                                                                                                                                                                                                                                                                                                                                                | Centro de Estudio de Enfermedades Autoinmunes (CREA), Universidad del Rosario, Bogota, Colombia                                                    | Centro de Investigaciones en Microbiología y Biotecnología-UR (CIMBIUR), Facultad de Ciencias Naturales, Universidad del Rosario, Bogotá, Colombia                                                                                                      | Carolina Ramírez-Santana; Gustavo Salguero; Juan David Ramírez; Juan Esteban Gallo; Juan-Manuel Anaya; Luz H. Patiño; Marina Muñoz; Nathalia Ballesteros; Sergio Castañeda                                                                                                                                                                                                                                                                                                                                                                                                                                                                                                                                                           |  |
| EPI_ISL_2612391                                                                                                                                                                                                                                                                                                                                                                                                                                                                                                                                                                                                                                                                                                                                                                                                                                                                                                                                                                                                                                                                                                                                                                   | Centro de Infectologia Charles Mérieux/ Laboratório Rodolphe Mérieux, FUNDHACRE                                                                    | Bioinformatics Laboratory / LNCC                                                                                                                                                                                                                        | Alessandra P Lamarca; Alexandra L Gerber; Ana Paula de C Guimarães; Ana Tereza R Vasconcelos; Andreas Stocker; Cirley Maria de Oliveira Lobato; Douglas Terra Machado; Luiz Fellype Alves de Souza; Luiz G P de Almeida; Ronaldo da Silva F Jr                                                                                                                                                                                                                                                                                                                                                                                                                                                                                       |  |
| EPI_ISL_2007473                                                                                                                                                                                                                                                                                                                                                                                                                                                                                                                                                                                                                                                                                                                                                                                                                                                                                                                                                                                                                                                                                                                                                                   | Centro de Investigaciones Básicas y Aplicadas, UNNOBA                                                                                              | Área de Secuenciación del Laboratorio de Virología del Hospital de Niños Dr. Ricardo Gutierrez on behalf of 'Proyecto Argentino Interinstitucional de genómica de SARS-CoV-2' (PAIS Consortium)                                                         | Acuña; Alexay; Bloq, Lucía Romano; D; Dr. Rodrigo Hernández del Pin; Dra. Alejandra Brandone y Dra. Natali Bagnis; Dra. Carolina Cristina; Dra. Fiorella Spinelli; Dra. Gianina Demarchi; Dra. InaSevic; Dra. Laura Alaniz; Dra. Laura Palumbo; Dra. María Gracia Balbi; Dra. Virginia Pasquinielli; Est. Lorenzo Morro; Goya; LE; Lic. Agustina Chimento; Lic. Alejandra Fernández; Lic. Alejandro Moroni; Lic. Angela Barbero y Lic. Laureano Español; Lic. Antonella Icardi; Lic. Chiara Cassarini; Lic. Daiana Vitale; Lic. Micaela Castro; Lic. Nadia Bonadeo; Lic. Paolo Rosales; Lic. Sofia Perrone; Lic. Sofia Valla; Lusso; M; Mi; Nabaes Jodar; Natale; S; Tc. Gastón Villafañe; Tc. Natalia Menite; Valinotto; Viegas, M. |  |
| EPI_ISL_944637                                                                                                                                                                                                                                                                                                                                                                                                                                                                                                                                                                                                                                                                                                                                                                                                                                                                                                                                                                                                                                                                                                                                                                    | Centro de Investigaciones en Microbiología y Biotecnología-UR (CIMBIUR), Facultad de Ciencias Naturales, Universidad del Rosario, Bogotá, Colombia | Centro de Investigaciones en Microbiología y Biotecnología-UR (CIMBIUR), Facultad de Ciencias Naturales, Universidad del Rosario, Bogotá, Colombia Instituto Nacional de Salud, Bogotá, Colombia Icahn School of Medicine at Mount Sinai, New York, USA | Adriana van de Guchte; Alberto Paniz-Mondolfi; Ana S. Gonzalez-Reiche; Carolina Flórez; Carolina Hernández; Emilia Mía Sordillo; Hala Alejel Alshammary; Harm van Bakel; Jayeeta Dutta; Juan David Ramírez; Luz Helena Patiño; Marina Muñoz; Matthew M. Hernandez; Nathalia Ballesteros; Sergio Gomez; Viviana Simon; Zenab Khan                                                                                                                                                                                                                                                                                                                                                                                                     |  |
| EPI_ISL_1396437, EPI_ISL_1396469, EPI_ISL_1396475, EPI_ISL_1396509, EPI_ISL_1396511                                                                                                                                                                                                                                                                                                                                                                                                                                                                                                                                                                                                                                                                                                                                                                                                                                                                                                                                                                                                                                                                                               | Centro de Tecnología en Salud Pública de la Universidad Nacional de Rosario                                                                        | Laboratorio Mixto de Biotecnología Acústica (LMBA) on behalf of 'Proyecto Argentino Interinstitucional de genómica de SARS-CoV-2' (PAIS Consortium)                                                                                                     | Adriana Giri; Agustina Cerri; Ana Cavatorta; Ana Paletta; Diego Chouhy; Elisa Bolatti; Elizabeth Tapia (argenTAG); Federico Remes Lenicov; Flavio Spetale; Gastón Viarengo; Ignacio García Labari; Javier Murillo; Joaquín Ezpeleta; Julian Acosta; Laura Angelone; Leandro Ciappina; María Re; Pablo Casal; Pilar Bulacio; Silvana Spinelli; Silvia Arranz; Sofia Lavista Llanos; Vanina Villanova; Victoria Posner                                                                                                                                                                                                                                                                                                                 |  |
| EPI_ISL_770039                                                                                                                                                                                                                                                                                                                                                                                                                                                                                                                                                                                                                                                                                                                                                                                                                                                                                                                                                                                                                                                                                                                                                                    | Centrālā Laboratorija                                                                                                                              | Latvian Biomedical Research and Study Centre                                                                                                                                                                                                            | Ivars Silamīkēlis; Jana Osīte; Jānis Kloviņš; Jānis Pjalkovskis; Kaspars Megnis; Marta Priedīte; Monta Ustinova; Stella Lapīna; Uga Dumpis; Vita Rovīte; Nikita Zrelavs                                                                                                                                                                                                                                                                                                                                                                                                                                                                                                                                                              |  |
| EPI_ISL_1590741                                                                                                                                                                                                                                                                                                                                                                                                                                                                                                                                                                                                                                                                                                                                                                                                                                                                                                                                                                                                                                                                                                                                                                   | Centrālā Laboratorija; Eurofins Genomics Europe Sequencing GmbH                                                                                    | Riga East University Hospital-National Microbiology Reference Laboratory; Eurofins Genomics Europe Sequencing GmbH                                                                                                                                      | Arzu Algulieva; Diāna Dusacka; Dārta Pūpola; Ilva Pole; Jana Osīte; Reinis Vangravs; Reinis Zeltmatis; Sergejs Niklins; Stella Lapīna; Ģirts Škenders                                                                                                                                                                                                                                                                                                                                                                                                                                                                                                                                                                                |  |
| EPI_ISL_501922                                                                                                                                                                                                                                                                                                                                                                                                                                                                                                                                                                                                                                                                                                                                                                                                                                                                                                                                                                                                                                                                                                                                                                    | Centrālā laboratorija                                                                                                                              | Latvian Biomedical Research and Study Centre                                                                                                                                                                                                            | Ivars Silamīkēlis; Jana Osīte; Jānis Kloviņš; Kaspars Megnis; Marta Priedīte; Monta Ustinova; Stella Lapīna; Uga Dumpis; Vita Rovīte; Nikita Zrelavs                                                                                                                                                                                                                                                                                                                                                                                                                                                                                                                                                                                 |  |
| EPI_ISL_2646266                                                                                                                                                                                                                                                                                                                                                                                                                                                                                                                                                                                                                                                                                                                                                                                                                                                                                                                                                                                                                                                                                                                                                                   | Cerballiance-IDF                                                                                                                                   | Cerba lab                                                                                                                                                                                                                                               | Aude Lessenne; Bénédicte Roquebert; Emmanuel Lecorche; Kader Merah; Laura Verdume; Patrice Herisson; Sabine Trombert-Paolantoni; Stéphanie Haim-Boukobza; Thierry Collin                                                                                                                                                                                                                                                                                                                                                                                                                                                                                                                                                             |  |
| EPI_ISL_2504138, EPI_ISL_2504140, EPI_ISL_2504141, EPI_ISL_2504142, EPI_ISL_2504143                                                                                                                                                                                                                                                                                                                                                                                                                                                                                                                                                                                                                                                                                                                                                                                                                                                                                                                                                                                                                                                                                               | Chantal Biya International Reference Centre (CIRCB)                                                                                                | International Centre for Genetic Engineering and Biotechnology (ICGEB) and ARGO Open Lab for Genome Sequencing                                                                                                                                          | Alessandro Marcello; Alexis Ndjolo; Celine Nkenfu; Collins Chenwi; Danilo Licastro; Desire Takou; Emanuele Orsini; Grace Angong Belournou; Joseph Fokam; Ndine Fainguem; Simeone Dal Monego                                                                                                                                                                                                                                                                                                                                                                                                                                                                                                                                          |  |
| EPI_ISL_753708, EPI_ISL_753720, EPI_ISL_753986                                                                                                                                                                                                                                                                                                                                                                                                                                                                                                                                                                                                                                                                                                                                                                                                                                                                                                                                                                                                                                                                                                                                    | Charité Universitätsmedizin Berlin, Institut für Virologie/Labor Berlin                                                                            | Charité Universitätsmedizin Berlin, Institut für Virologie                                                                                                                                                                                              | Barbara Mühlemann; Christian Drosten; Julia Schneider; Jörn Beheim-Schwarzbach; Talitha Veith; Terry Jones; Victor M Corman                                                                                                                                                                                                                                                                                                                                                                                                                                                                                                                                                                                                          |  |
| EPI_ISL_2337257                                                                                                                                                                                                                                                                                                                                                                                                                                                                                                                                                                                                                                                                                                                                                                                                                                                                                                                                                                                                                                                                                                                                                                   | Chiba Prefectural Institute of Public Health                                                                                                       | Pathogen Genomics Center, National Institute of Infectious Diseases                                                                                                                                                                                     | Kentaro Itokawa; Makoto Kuroda; Masanori Hashino; Rina Tanaka; Tsuyoshi Sekizuka                                                                                                                                                                                                                                                                                                                                                                                                                                                                                                                                                                                                                                                     |  |
| EPI_ISL_2342019, EPI_ISL_2342110, EPI_ISL_2342128, EPI_ISL_2342354                                                                                                                                                                                                                                                                                                                                                                                                                                                                                                                                                                                                                                                                                                                                                                                                                                                                                                                                                                                                                                                                                                                | Chief District Medical Office, Cuttack                                                                                                             | Institute of Life Sciences - INSACOG                                                                                                                                                                                                                    | Ajay Parida; Amol M. Kanampalliwar; Arup Ghosh; Atimukta Jha; INSACOG Consortium; Omprakash Shiriwaa; Punit Prasad; Rajeeb Swain; Rupesh Dash; Safal Walia; Sana Fatma; Shifu Aggarwal; Sunil K. Raghav                                                                                                                                                                                                                                                                                                                                                                                                                                                                                                                              |  |
| EPI_ISL_700346, EPI_ISL_1752692, EPI_ISL_2445998, EPI_ISL_2692860                                                                                                                                                                                                                                                                                                                                                                                                                                                                                                                                                                                                                                                                                                                                                                                                                                                                                                                                                                                                                                                                                                                 | Child Health Research Foundation                                                                                                                   | Child Health Research Foundation                                                                                                                                                                                                                        | Afroza Akter Tanni; Arif Mohammad Tanmoy; CHRF Bangladesh Genomics Team; Md Hafizur Rahman; Roly Malaker; Samir K Saha; Senjuti Saha; Sharmistha Goswami; Syed Mukhtadir Al Sium                                                                                                                                                                                                                                                                                                                                                                                                                                                                                                                                                     |  |
| EPI_ISL_2162123, EPI_ISL_2162124, EPI_ISL_2162196, EPI_ISL_2162209                                                                                                                                                                                                                                                                                                                                                                                                                                                                                                                                                                                                                                                                                                                                                                                                                                                                                                                                                                                                                                                                                                                | Children's City Clinical Infectious Diseases Hospital                                                                                              | Reference laboratory for the control of viral infections                                                                                                                                                                                                | Aidar Ussebayev; Aknur Mutaliyeva; Andrey Komissarov; Artem Fadeev; Azamat Kenessov; Bekzhan Maikotov; Gaukhara Nussupbayeva; Madina Tleubergenova; Maria Pisareva; Nazym Tleumbetova                                                                                                                                                                                                                                                                                                                                                                                                                                                                                                                                                |  |
| EPI_ISL_1970348, EPI_ISL_1970349                                                                                                                                                                                                                                                                                                                                                                                                                                                                                                                                                                                                                                                                                                                                                                                                                                                                                                                                                                                                                                                                                                                                                  | Chongqing International Travel Health Care Center                                                                                                  | Chongqing Municipal Center for Disease Control and Prevention                                                                                                                                                                                           | Dong Wang; Haiyan Wen; Hua Ling; Lan Zhou; Mingyue Wang; Rong Rong; Sheng Ye; Shuang Chen; Wenge Tang; Xingdan Luo; Yanqing Peng; Yun Tang; Zhangping Tan; Zhaoxui Deng , Shuang Chen; Zhen Yu                                                                                                                                                                                                                                                                                                                                                                                                                                                                                                                                       |  |
| EPI_ISL_1970347                                                                                                                                                                                                                                                                                                                                                                                                                                                                                                                                                                                                                                                                                                                                                                                                                                                                                                                                                                                                                                                                                                                                                                   | Chongqing Yuzhong District Center For Disease Control And Prevention                                                                               | Chongqing Municipal Center for Disease Control and Prevention                                                                                                                                                                                           | Hua Ling; Jiaqi Li; Mingyue Wang; Rong Rong; Sheng Ye; Shuang Chen; Wenge Tang; Yingbing Zhou; Yun Tang; Yuyue Luo; Zhangping Tan; Zhen Yu                                                                                                                                                                                                                                                                                                                                                                                                                                                                                                                                                                                           |  |
| EPI_ISL_1398367                                                                                                                                                                                                                                                                                                                                                                                                                                                                                                                                                                                                                                                                                                                                                                                                                                                                                                                                                                                                                                                                                                                                                                   | Cianjur Public Health                                                                                                                              | West Java Health Laboratory; School of Life Sciences and Technology, Institut Teknologi Bandung                                                                                                                                                         | Azzania Fibriani; Cut Nur Cinthia Alamanda; Ema Rahmawati; Isak Solihin; Kamila Tania; Karimatu Khoirunnisa; Miftahul Faridi; Rifky Waluyajati Rachman; Rini Robiani; Ryan Bayusantika Ristandi                                                                                                                                                                                                                                                                                                                                                                                                                                                                                                                                      |  |
| EPI_ISL_2162172                                                                                                                                                                                                                                                                                                                                                                                                                                                                                                                                                                                                                                                                                                                                                                                                                                                                                                                                                                                                                                                                                                                                                                   | City Clinical Infectious Diseases Hospital named after I.S. Zhekenova                                                                              | Reference laboratory for the control of viral infections                                                                                                                                                                                                | Aidar Ussebayev; Aknur Mutaliyeva; Andrey Komissarov; Artem Fadeev; Azamat Kenessov; Bekzhan Maikotov; Gaukhara Nussupbayeva; Madina Tleubergenova; Maria Pisareva; Nazym Tleumbetova                                                                                                                                                                                                                                                                                                                                                                                                                                                                                                                                                |  |
| EPI_ISL_1424939                                                                                                                                                                                                                                                                                                                                                                                                                                                                                                                                                                                                                                                                                                                                                                                                                                                                                                                                                                                                                                                                                                                                                                   | Clalit Health Services Laboratories, Israel                                                                                                        | Stern Lab                                                                                                                                                                                                                                               | Stern Lab                                                                                                                                                                                                                                                                                                                                                                                                                                                                                                                                                                                                                                                                                                                            |  |
| EPI_ISL_462461, EPI_ISL_462474                                                                                                                                                                                                                                                                                                                                                                                                                                                                                                                                                                                                                                                                                                                                                                                                                                                                                                                                                                                                                                                                                                                                                    | Clinical Center, University of Sarajevo                                                                                                            | Charite Universitatsmedizin Berlin, Institute of Virology                                                                                                                                                                                               | Almedina Hadzihanovic-Moro; Amela Dedeic-Ljubovic; Barbara Muehlemann; Christian Drosten; Irma Salimovic-Besic; Jörn Beheim-Schwarzbach; Julia Schneider; Selma Mutevelic; Suzana Arapcic; Talitha Veith; Terry Jones; Victor M Corman                                                                                                                                                                                                                                                                                                                                                                                                                                                                                               |  |
| EPI_ISL_1240073, EPI_ISL_1300645, EPI_ISL_1300647, EPI_ISL_1300650, EPI_ISL_1300659                                                                                                                                                                                                                                                                                                                                                                                                                                                                                                                                                                                                                                                                                                                                                                                                                                                                                                                                                                                                                                                                                               | Clinical Center, University of Sarajevo; Unit for Clinical Microbiology                                                                            | Clinical Center, University of Sarajevo; Unit for Clinical Microbiology                                                                                                                                                                                 | Amela Dedeić-Ljubović; Edina Zahirović; Golubinka Boshevaska; Irma Salimović-Besić; Maja Kuzmanovska; Sandra Vegar-Zubović; Sebiha Izetbegović; Suzana Arapčić                                                                                                                                                                                                                                                                                                                                                                                                                                                                                                                                                                       |  |
| EPI_ISL_2426148, EPI_ISL_2426149, EPI_ISL_2426151, EPI_ISL_2426153, EPI_ISL_2426154, EPI_ISL_2426155, EPI_ISL_2426156, EPI_ISL_2426159, EPI_ISL_2426160, EPI_ISL_2426161, EPI_ISL_2426162, EPI_ISL_2426163, EPI_ISL_2426164, EPI_ISL_2426165, EPI_ISL_2426166, EPI_ISL_2426167, EPI_ISL_2426168, EPI_ISL_2426170, EPI_ISL_2426171, EPI_ISL_2426175, EPI_ISL_2426177, EPI_ISL_2426178, EPI_ISL_2426179, EPI_ISL_2426180, EPI_ISL_2426182, EPI_ISL_2426183, EPI_ISL_2426186, EPI_ISL_2426187                                                                                                                                                                                                                                                                                                                                                                                                                                                                                                                                                                                                                                                                                        |                                                                                                                                                    |                                                                                                                                                                                                                                                         |                                                                                                                                                                                                                                                                                                                                                                                                                                                                                                                                                                                                                                                                                                                                      |  |
| see above                                                                                                                                                                                                                                                                                                                                                                                                                                                                                                                                                                                                                                                                                                                                                                                                                                                                                                                                                                                                                                                                                                                                                                         | Clinical Virology Laboratory, Institute of Liver and Biliary Sciences                                                                              | ILBS - IGIB                                                                                                                                                                                                                                             | Amit Pandey; Anurag Agrawal; Aparna S; Bharathram Uppili; Chhagan Bihari Sharma; Ekta Gupta; Manish Kumar; Mohammed Faruq; Neha Jha; Partha Chattopadhyay; Pooja Sharma; Pratibha Kale; Priti Devi; Priyanka Mehta; Rajesh Pandey; Ranjeet Maurya; Sarfaraz Alam; Sheeba Saifi; Sheetalnath Rooge; Shiv Kumar Sarin                                                                                                                                                                                                                                                                                                                                                                                                                  |  |
| EPI_ISL_2427381, EPI_ISL_2427389, EPI_ISL_2427396, EPI_ISL_2427399, EPI_ISL_2492437, EPI_ISL_2492438, EPI_ISL_2492439, EPI_ISL_2626062, EPI_ISL_2626067, EPI_ISL_2626068, EPI_ISL_2626072, EPI_ISL_2638046, EPI_ISL_2778098                                                                                                                                                                                                                                                                                                                                                                                                                                                                                                                                                                                                                                                                                                                                                                                                                                                                                                                                                       |                                                                                                                                                    |                                                                                                                                                                                                                                                         |                                                                                                                                                                                                                                                                                                                                                                                                                                                                                                                                                                                                                                                                                                                                      |  |
| see above                                                                                                                                                                                                                                                                                                                                                                                                                                                                                                                                                                                                                                                                                                                                                                                                                                                                                                                                                                                                                                                                                                                                                                         | Clinique Saint-Pierre Ottignies                                                                                                                    | UCLouvain/IREC/MBLG                                                                                                                                                                                                                                     | Benoit Kabamba Mukadi; Bertrand Bearzatto; Jean Ruelle; Ophélie Simon                                                                                                                                                                                                                                                                                                                                                                                                                                                                                                                                                                                                                                                                |  |
| EPI_ISL_1935601, EPI_ISL_2348848, EPI_ISL_2348862, EPI_ISL_2427343, EPI_ISL_2427353, EPI_ISL_2492429, EPI_ISL_2492430, EPI_ISL_2492431, EPI_ISL_2492432, EPI_ISL_2492433, EPI_ISL_2492434, EPI_ISL_2492435, EPI_ISL_2492436, EPI_ISL_2510682, EPI_ISL_2626010, EPI_ISL_2626012, EPI_ISL_2626015, EPI_ISL_2626021, EPI_ISL_2626023, EPI_ISL_2626028, EPI_ISL_2626031, EPI_ISL_2626032, EPI_ISL_2626037, EPI_ISL_2626083, EPI_ISL_2626084, EPI_ISL_2626085, EPI_ISL_2626086, EPI_ISL_2626087, EPI_ISL_2626088, EPI_ISL_2626089, EPI_ISL_2626091, EPI_ISL_2626092, EPI_ISL_2626093, EPI_ISL_2626094, EPI_ISL_2626095, EPI_ISL_2626096, EPI_ISL_2626099, EPI_ISL_2778018, EPI_ISL_2778019, EPI_ISL_2778020, EPI_ISL_2778022, EPI_ISL_2778024, EPI_ISL_2778025, EPI_ISL_2778026, EPI_ISL_2778028, EPI_ISL_2778029, EPI_ISL_2778032, EPI_ISL_2778037, EPI_ISL_2778040, EPI_ISL_2778041, EPI_ISL_2778047, EPI_ISL_2778048, EPI_ISL_2778051, EPI_ISL_2778053, EPI_ISL_2778055, EPI_ISL_2778057, EPI_ISL_2778063, EPI_ISL_2778064, EPI_ISL_2778066, EPI_ISL_2778069, EPI_ISL_2778071, EPI_ISL_2778072, EPI_ISL_2778074, EPI_ISL_2778079, EPI_ISL_2778081, EPI_ISL_2778082, EPI_ISL_2778090 |                                                                                                                                                    |                                                                                                                                                                                                                                                         |                                                                                                                                                                                                                                                                                                                                                                                                                                                                                                                                                                                                                                                                                                                                      |  |
| see above                                                                                                                                                                                                                                                                                                                                                                                                                                                                                                                                                                                                                                                                                                                                                                                                                                                                                                                                                                                                                                                                                                                                                                         | Cliniques universitaires Saint-Luc                                                                                                                 | UCLouvain/IREC/MBLG                                                                                                                                                                                                                                     | Benoit Kabamba Mukadi; Bertrand Bearzatto; Eleonore Ngyuvula; Jean Ruelle; Nicolas Pinte; Ophélie Simon                                                                                                                                                                                                                                                                                                                                                                                                                                                                                                                                                                                                                              |  |
| EPI_ISL_632262, EPI_ISL_678262, EPI_ISL_678272, EPI_ISL_681299, EPI_ISL_681301, EPI_ISL_681309, EPI_ISL_682303, EPI_ISL_1660421, EPI_ISL_1660425, EPI_ISL_1660426, EPI_ISL_1660427, EPI_ISL_1660429, EPI_ISL_1660430, EPI_ISL_1660432, EPI_ISL_1660439, EPI_ISL_1660442, EPI_ISL_1660445, EPI_ISL_1660447, EPI_ISL_1660448, EPI_ISL_1660450, EPI_ISL_1660456, EPI_ISL_1660458                                                                                                                                                                                                                                                                                                                                                                                                                                                                                                                                                                                                                                                                                                                                                                                                     |                                                                                                                                                    |                                                                                                                                                                                                                                                         |                                                                                                                                                                                                                                                                                                                                                                                                                                                                                                                                                                                                                                                                                                                                      |  |
| see above                                                                                                                                                                                                                                                                                                                                                                                                                                                                                                                                                                                                                                                                                                                                                                                                                                                                                                                                                                                                                                                                                                                                                                         | Communicable Disease Laboratory, Public Health Directorate                                                                                         | Communicable Disease Laboratory, Public Health Directorate                                                                                                                                                                                              | Alabbas, Z.; AliHujairi, Z.; AlTauf, Z.; AlWasti, H.; Almoamen, G.; Altaif, Z.; Alwasti, H.; Marhoon, A.                                                                                                                                                                                                                                                                                                                                                                                                                                                                                                                                                                                                                             |  |
| EPI_ISL_510528                                                                                                                                                                                                                                                                                                                                                                                                                                                                                                                                                                                                                                                                                                                                                                                                                                                                                                                                                                                                                                                                                                                                                                    | Communicable Disease Laboratory, Public Health Directorate                                                                                         | Communicable Disease Laboratory, Public Health Directorate                                                                                                                                                                                              | Al Wasti; H. and AlTauf, Z.                                                                                                                                                                                                                                                                                                                                                                                                                                                                                                                                                                                                                                                                                                          |  |
| EPI_ISL_2469779, EPI_ISL_2632134                                                                                                                                                                                                                                                                                                                                                                                                                                                                                                                                                                                                                                                                                                                                                                                                                                                                                                                                                                                                                                                                                                                                                  | Corona-Testzentrum ifp Institut für Produktqualität GmbH                                                                                           | Robert Koch Institute                                                                                                                                                                                                                                   |                                                                                                                                                                                                                                                                                                                                                                                                                                                                                                                                                                                                                                                                                                                                      |  |
| EPI_ISL_1287369, EPI_ISL_2626562, EPI_ISL_2627292                                                                                                                                                                                                                                                                                                                                                                                                                                                                                                                                                                                                                                                                                                                                                                                                                                                                                                                                                                                                                                                                                                                                 | Croatian Institute of Public Health                                                                                                                | Croatian Institute of Public Health                                                                                                                                                                                                                     | Irena Tabain; Ivana Ferenčak                                                                                                                                                                                                                                                                                                                                                                                                                                                                                                                                                                                                                                                                                                         |  |
| EPI_ISL_904028                                                                                                                                                                                                                                                                                                                                                                                                                                                                                                                                                                                                                                                                                                                                                                                                                                                                                                                                                                                                                                                                                                                                                                    | DB Diagnosticos do Brasil                                                                                                                          | Laboratório de Parasitologia Médica - Instituto de Medicina Tropical - Universidade de São Paulo                                                                                                                                                        | Brazil-UK Centre for Arbovirus Discovery Diagnosis Genomics and Epidemiology (CADDE) Genomic Network - Instituto de Medicina Tropical                                                                                                                                                                                                                                                                                                                                                                                                                                                                                                                                                                                                |  |
| EPI_ISL_1636523                                                                                                                                                                                                                                                                                                                                                                                                                                                                                                                                                                                                                                                                                                                                                                                                                                                                                                                                                                                                                                                                                                                                                                   | DNA Solution Ltd.                                                                                                                                  | Genomic Research Lab, BCsIR                                                                                                                                                                                                                             | Abu Sayeed Mohammad Mahmud; Barna Goswami; Eshrar Osman; Iffat Jahan; Kazi Nadim Hasan; Md Firoz Kabir; Md. Abdul Khaleque; Md. Ahasan Habib; Md. Mizanur Rahman; Md. Murshed Hasan Sarkar; Md. Saddam Hossain; Md. Salim Khan; Mohammad Fazle Alam Rabbi; Mohammad Mohi Uddin; Mohammad Samir Uzzaman; Shahina Akter; Sharif Akhteruzzamani; Tanjina Akhter Banu                                                                                                                                                                                                                                                                                                                                                                    |  |

|                                                                                                                                                                                                                                                                                                                                                                                                                                                                                                                                                                                                                                                                                                                                                                                                                                                                 |                                                                                                                                                                                         |                                                                                                                                                                                         |                                                                                                                                                                                                                                                                                                                                                                                                                                                                                                                                                                                   |
|-----------------------------------------------------------------------------------------------------------------------------------------------------------------------------------------------------------------------------------------------------------------------------------------------------------------------------------------------------------------------------------------------------------------------------------------------------------------------------------------------------------------------------------------------------------------------------------------------------------------------------------------------------------------------------------------------------------------------------------------------------------------------------------------------------------------------------------------------------------------|-----------------------------------------------------------------------------------------------------------------------------------------------------------------------------------------|-----------------------------------------------------------------------------------------------------------------------------------------------------------------------------------------|-----------------------------------------------------------------------------------------------------------------------------------------------------------------------------------------------------------------------------------------------------------------------------------------------------------------------------------------------------------------------------------------------------------------------------------------------------------------------------------------------------------------------------------------------------------------------------------|
| EPI_ISL_2725072                                                                                                                                                                                                                                                                                                                                                                                                                                                                                                                                                                                                                                                                                                                                                                                                                                                 | DNAGYN                                                                                                                                                                                  | LGBio - Laboratório de Genética & Biodiversidade                                                                                                                                        | Alex Honda Bernardes; Amanda Alves de Melo; Aparecido Divino da Cruz; Cintia Pelegrineti Targueta de Azevedo Brito; Daniela de Melo e Silva; Elisângela de Paula Silveira Lacerda; Francylli Mello Andrade; Juliana Santana de Curcio; Luiz Augusto Pereira; Marc Alexandre Duarte Gigonzac; Mariana Pires de Campos Telles; Ramilla dos Santos Braga; Renata de Oliveira Dias; Rhowter Nunes; Thais Cidália Vieira Gigonzac; Thais Guimarães Castro; Thays Miliena Alves Pedroso                                                                                                 |
| EPI_ISL_2728324                                                                                                                                                                                                                                                                                                                                                                                                                                                                                                                                                                                                                                                                                                                                                                                                                                                 | DSU HASSAN                                                                                                                                                                              | INSACOG-KA, NIMHANS                                                                                                                                                                     | Ananthapadmanabha Kotambail; Anita S Desai; Anson Kunjumon George; Chetan G K; Chitra Pattabiraman; Darshan Sreenivas; Ellango Ramasamy; Gautham Arunachal Udupi; Mahesh Kumar.C.S; Sony Sharma; V Ravi                                                                                                                                                                                                                                                                                                                                                                           |
| EPI_ISL_2450343,<br>EPI_ISL_2450344,<br>EPI_ISL_2450345,<br>EPI_ISL_2450346,<br>EPI_ISL_2450347,<br>EPI_ISL_2450348                                                                                                                                                                                                                                                                                                                                                                                                                                                                                                                                                                                                                                                                                                                                             | DSU KOLAR                                                                                                                                                                               | INSACOG-KA, NIMHANS                                                                                                                                                                     | Ananthapadmanabha Kotambail; Anita S Desai; Anson Kunjumon George; Chetan G K; Chitra Pattabiraman; Darshan Sreenivas; Gautham Arunachal Udupi; V Ravi                                                                                                                                                                                                                                                                                                                                                                                                                            |
| EPI_ISL_2728349, EPI_ISL_2728351, EPI_ISL_2728352, EPI_ISL_2728354, EPI_ISL_2728359, EPI_ISL_2728360, EPI_ISL_2728361, EPI_ISL_2728362, EPI_ISL_2728363, EPI_ISL_2728364, EPI_ISL_2728366, EPI_ISL_2728370, EPI_ISL_2728375, EPI_ISL_2728380, EPI_ISL_2728381, EPI_ISL_2728384, EPI_ISL_2728385, EPI_ISL_2728388, EPI_ISL_2728389, EPI_ISL_2728390, EPI_ISL_2728391, EPI_ISL_2728392, EPI_ISL_2728396, EPI_ISL_2728399, EPI_ISL_2728400, EPI_ISL_2728401, EPI_ISL_2728406, EPI_ISL_2728408, EPI_ISL_2728409, EPI_ISL_2728412, EPI_ISL_2728414, EPI_ISL_2728415, EPI_ISL_2728417, EPI_ISL_2728418, EPI_ISL_2728419, EPI_ISL_2728420, EPI_ISL_2728421, EPI_ISL_2728424, EPI_ISL_2728425                                                                                                                                                                           | DSU VIJAYAPURA                                                                                                                                                                          | INSACOG-KA, NIMHANS                                                                                                                                                                     | Ananthapadmanabha Kotambail; Anita S Desai; Anson Kunjumon George; Chetan G K; Chitra Pattabiraman; Darshan Sreenivas; Ellango Ramasamy; Gautham Arunachal Udupi; Mahesh Kumar.C.S; Sony Sharma; V Ravi                                                                                                                                                                                                                                                                                                                                                                           |
| see above                                                                                                                                                                                                                                                                                                                                                                                                                                                                                                                                                                                                                                                                                                                                                                                                                                                       |                                                                                                                                                                                         |                                                                                                                                                                                         |                                                                                                                                                                                                                                                                                                                                                                                                                                                                                                                                                                                   |
| EPI_ISL_2100635, EPI_ISL_2100636, EPI_ISL_2100637, EPI_ISL_2100638, EPI_ISL_2100639, EPI_ISL_2100640, EPI_ISL_2100641, EPI_ISL_2100642, EPI_ISL_2100643, EPI_ISL_2100644, EPI_ISL_2100645, EPI_ISL_2100646, EPI_ISL_2100647, EPI_ISL_2100648, EPI_ISL_2100649, EPI_ISL_2100650, EPI_ISL_2100651, EPI_ISL_2100652, EPI_ISL_2100653, EPI_ISL_2100654, EPI_ISL_2100655, EPI_ISL_2100656, EPI_ISL_2100657, EPI_ISL_2100658, EPI_ISL_2100659, EPI_ISL_2100660, EPI_ISL_2100661, EPI_ISL_2100662, EPI_ISL_2100663, EPI_ISL_2100664, EPI_ISL_2100665, EPI_ISL_2100666, EPI_ISL_2100667, EPI_ISL_2100668, EPI_ISL_2100669, EPI_ISL_2100670, EPI_ISL_2100671, EPI_ISL_2100672, EPI_ISL_2105576, EPI_ISL_2105577, EPI_ISL_2105578, EPI_ISL_2105579, EPI_ISL_2105580, EPI_ISL_2105581, EPI_ISL_2106198                                                                     | Delhi North District                                                                                                                                                                    | CSIR-Institute of Genomics and Integrative Biology                                                                                                                                      | Animesh Ray; Asangala Kamai; Ashwin Varadarajan; Ayush Goel; Bharathram Uppilli*; Devashish Desai; Manish Kumar; Mohammed Ahmed; Mohammed Faruq; Naveet Wig; Pooja Sharma*; Rajesh Pandey; Sarafaraz Alam; Saruchi Wadhwa; Satish Swain; Sheeba Saifi; Sushma Rajpoot; Umang Arora                                                                                                                                                                                                                                                                                                |
| see above                                                                                                                                                                                                                                                                                                                                                                                                                                                                                                                                                                                                                                                                                                                                                                                                                                                       |                                                                                                                                                                                         |                                                                                                                                                                                         |                                                                                                                                                                                                                                                                                                                                                                                                                                                                                                                                                                                   |
| EPI_ISL_470876, EPI_ISL_470877, EPI_ISL_481380, EPI_ISL_481483, EPI_ISL_763062, EPI_ISL_1791045, EPI_ISL_1791055, EPI_ISL_1914578, EPI_ISL_1914603, EPI_ISL_1914604, EPI_ISL_1914670, EPI_ISL_1914783, EPI_ISL_1914784, EPI_ISL_1914938, EPI_ISL_1921858, EPI_ISL_1921879, EPI_ISL_2319000, EPI_ISL_2319003                                                                                                                                                                                                                                                                                                                                                                                                                                                                                                                                                     | Department for Virology, Molecular Biology and Genome Research, R. G. Lugar Center for Public Health Research, National Center for Disease Control and Public Health (NCDC) of Georgia. | Department for Virology, Molecular Biology and Genome Research, R. G. Lugar Center for Public Health Research, National Center for Disease Control and Public Health (NCDC) of Georgia. | Adam Kotorashvili; Amiran Gamkrelidze.; Ana Papkiauri; Ann Machablishvili; Anna Kasradze; Davit Tsaguria; Ekaterine Khmaladze; Ekaterine Zangaladze; Ekaterine Zhghenti; Giorgi Gogoladze; Giorgi Tomashvili; Gvantsa Brachveli; Gvantsa Chanturia; Irma Burjanadze; Ketevan Sidamonidze; Khatuna Zakhashvili; Lela Sabadze; Lela Urushadze; Magda Dgebuadze; Maia Alkhasashvili; Mari Gavashelidze; Mariam Zakalashvili; Marine Murtskhaladze; Meri Pantsulaia; Nato Kotaria; Nino Berishvili; Paata Imnadze; Roena Sukhiasvili; Tamar Jashiasvili; Tata Imnadze; Tea Tvedoradze |
| EPI_ISL_2412528, EPI_ISL_2413433, EPI_ISL_2431016, EPI_ISL_2666392, EPI_ISL_2667354, EPI_ISL_2784479                                                                                                                                                                                                                                                                                                                                                                                                                                                                                                                                                                                                                                                                                                                                                            | Department of Bacteria, Parasites and Fungi, Statens Serum Institut, Copenhagen, Denmark                                                                                                | Statens Serum Institut Bioinformatics and Microbial Genomics                                                                                                                            | Danish Covid-19 Genome Consortium                                                                                                                                                                                                                                                                                                                                                                                                                                                                                                                                                 |
| EPI_ISL_515094, EPI_ISL_515103                                                                                                                                                                                                                                                                                                                                                                                                                                                                                                                                                                                                                                                                                                                                                                                                                                  | Department of Biochemistry, Cell and Molecular Biology                                                                                                                                  | WACCBI, University of Ghana                                                                                                                                                             | A.K.; Adu, B.; Amenga-Etego; Ampofo, W.; Amuzu; Anang; Arjarquah, A.; Asante, I.; Awandare; Bediako, Y.; Boatema, L.; Bonney, E.; Bonney, K.; C.M.; D.S.; Eshun, M.; G.A.; G.B.; J.K.; J.M.; Kotey, E.; Kumordjie, S.; Kyei; L.N.; Magnussen, V.; Morang'a, Mutungi; Ngoi; Quashie, P.; Tei-Maya, F.                                                                                                                                                                                                                                                                              |
| EPI_ISL_884856                                                                                                                                                                                                                                                                                                                                                                                                                                                                                                                                                                                                                                                                                                                                                                                                                                                  | Department of Biochemistry, Cell and Molecular Biology, West African Centre for Cell Biology of Infectious Pathogens (WACCBI), University of Ghana                                      | Department of Biochemistry, Cell and Molecular Biology, West African Centre for Cell Biology of Infectious Pathogens (WACCBI), University of Ghana                                      | A.-K.; A.B.; Abass; Akoriyea; Amenga-Etego; Amoako, E.; Amuzu; Awandare; Bediako, Y.; Boakye; C.M.; D.S.; Diallo; G.A.; J.M.; Kibinge, N.; Kumi-Ansah, F.; L.N.; Magnussen, V.; Mohammed, A.; Morang'a; Ngoi; O.D.; Odom, T.; Quashie, P.; S.K.; Tapela, K.; Tei-Maya, F.                                                                                                                                                                                                                                                                                                         |
| EPI_ISL_678405, EPI_ISL_2003343, EPI_ISL_2426586, EPI_ISL_2612790, EPI_ISL_2612793, EPI_ISL_2685887, EPI_ISL_2685889, EPI_ISL_2728639                                                                                                                                                                                                                                                                                                                                                                                                                                                                                                                                                                                                                                                                                                                           | Department of Clinical Microbiology                                                                                                                                                     | GIGA Medical Genomics                                                                                                                                                                   | Bouchra Boujemla; Claire Gourzonès; Cécile Meex; Keith Durkin; Laurent Gillet; Maria Artesi; Marie-Pierre Hayette; Nadine Cambisano; Nathalie Renotte; Olivier Ek; Pierrette Melin; Raphaël Boreux; Sébastien Bontems; Vincent Bours                                                                                                                                                                                                                                                                                                                                              |
| see above                                                                                                                                                                                                                                                                                                                                                                                                                                                                                                                                                                                                                                                                                                                                                                                                                                                       |                                                                                                                                                                                         |                                                                                                                                                                                         |                                                                                                                                                                                                                                                                                                                                                                                                                                                                                                                                                                                   |
| EPI_ISL_2025798                                                                                                                                                                                                                                                                                                                                                                                                                                                                                                                                                                                                                                                                                                                                                                                                                                                 | Department of Clinical Microbiology and Center for Genomic Medicine, Rigshospitalet, Copenhagen, Denmark                                                                                | Aalborg University                                                                                                                                                                      | Danish Covid-19 Genome Consortium                                                                                                                                                                                                                                                                                                                                                                                                                                                                                                                                                 |
| EPI_ISL_1547372, EPI_ISL_1550506                                                                                                                                                                                                                                                                                                                                                                                                                                                                                                                                                                                                                                                                                                                                                                                                                                | Department of Genetic Engineering and Biotechnology, Shahjalal University of Science and Technology                                                                                     | Genomic Research Lab, BCsir                                                                                                                                                             | Abu Sayeed Mohammad Mahmud; Ajit Ghosh; Barna Goswami; Eshrar Osman; G. M. Nurnabi Azad Jewel; G. M. Nurnabi Azad Jewel; Iffat Jahan; Md. Ahasan Habib; Md. Akkas Ali; Md. Asrafal Jahan; Md. Fahmid Hossain Bhuiyan; Md. Hammadul Hoque; Md. Kamrul Islam; Md. Murshed Hasan Sarkar; Md. Nazmul Hasan; Md. Saddam Hossain; Md. Salim Khan; Md. Shamsul Haque Prothan; Mohammad Mohi Uddin; Mohammad Samir Uzzaman; Shahina Akter; Tanjina Akhter Banu                                                                                                                            |
| EPI_ISL_610207, EPI_ISL_2378701, EPI_ISL_2378704                                                                                                                                                                                                                                                                                                                                                                                                                                                                                                                                                                                                                                                                                                                                                                                                                | Department of Health Technology and Informatics, The Hong Kong Polytechnic University                                                                                                   | Department of Health Technology and Informatics, The Hong Kong Polytechnic University                                                                                                   | A.K.-L.; A.Y.-M.; B.H.-S.; B.K.-C.; B.P.-H.; C.T.-M.; Chan; Chau; Chen, H.; Cheng; D.C.; D.H.-K.; D.S.-H.; E.Y.-K.; E.Y.-W.; Fung; G.K.-H.; H.-C.; H.-Y.; H.W.-H.; Ho; J.S.-L.; J.Y.-W.; Jim; K.-T.; K.-Y.; K.K.; K.K.-G.; K.K.-S.; K.K.-S.; K.N.; K.S.-C.; K.S.-S.; L.-K.; Lai; Lam; Lao; Lee; Leung; Lo; Lu; Luk, K.; Luk, S.; Lung; M.-C.; M.C.-Y.; Mok; Ng; Que; R.A.; S.-C.; S.K.-Y.; S.P.; Shum; Siu; T.-L.; T.T.-L.; Tam; To; Tse, H.; V.C.-C.; W.-K.; W.-S.; W.C.; Wong; Wu; Y.W.-M.; Yam; Yao; Yeh; Yip; Yuen                                                            |
| EPI_ISL_1018120, EPI_ISL_1018280, EPI_ISL_1018313, EPI_ISL_1797626, EPI_ISL_2443057                                                                                                                                                                                                                                                                                                                                                                                                                                                                                                                                                                                                                                                                                                                                                                             | Department of Health Technology and Informatics, The Hong Kong Polytechnic University                                                                                                   | Department of Health Technology and Informatics, The Hong Kong Polytechnic University                                                                                                   | Alan Ka-Lun Wu; Alex Yat-Man Ho; Barry Kin-Chung Wong; Chloe Toi-Mei Chan; David Ho-Keung Shum; Denise Sze-Hang Wong; Gilman Kit-Hang Siu; Hiu-Yin Lao; Hoi-Ching Jim; Jake Siu-Lun Leung; Kam-Tong Yip; Kenneth Siu-Sing Leung; Kingsley King-Gee Tam; Kitty Sau-Chun Fung; Kristine Luk; Lam-Kwong Lee; Miranda Chong-Yee Yau; Sandy Ka-Yee Chau; Shea Ping Yip; Tak-Lun Que; Timothy Ting-Leung Ng; Wing Cheong Yam; Wing-Hei Lo; Wing-Kin To; Yvette Wai-Man Lai                                                                                                              |
| EPI_ISL_1920595                                                                                                                                                                                                                                                                                                                                                                                                                                                                                                                                                                                                                                                                                                                                                                                                                                                 | Department of Hygiene, Epidemiology and Medical Statistics, Medical School, National and Kapodistrian University of Athens                                                              | Central Public Health Laboratory, National Public Health Organization                                                                                                                   | Gkikas Magiorkinis et al                                                                                                                                                                                                                                                                                                                                                                                                                                                                                                                                                          |
| EPI_ISL_1425484, EPI_ISL_1941895, EPI_ISL_1941944                                                                                                                                                                                                                                                                                                                                                                                                                                                                                                                                                                                                                                                                                                                                                                                                               | Department of Infectious Diseases, Kobe Institute of Health                                                                                                                             | Department of Infectious Diseases, Kobe Institute of Health                                                                                                                             | Kentaro Itokawa; Makoto Kuroda; Masanori Hashino; Noriko Nakanishi; Rina Tanaka; Ryohel Nomoto; Tomotada Iwamoto; Tsuyoshi Sekizuka                                                                                                                                                                                                                                                                                                                                                                                                                                               |
| EPI_ISL_1209281, EPI_ISL_1209288, EPI_ISL_1495324                                                                                                                                                                                                                                                                                                                                                                                                                                                                                                                                                                                                                                                                                                                                                                                                               | Department of Laboratory Medicine, Division of Clinical Virology, University of Medicine, Vienna                                                                                        | Berghaler laboratory, CeMM Research Center for Molecular Medicine of the Austrian Academy of Sciences                                                                                   | Andreas Berghaler; Anna Schedl; Bekir Erguner; Benedikt Agerer; Christoph Bock; Fabian Amman; Jan Laine; Lukas Endler; Maelle Le Moing; Martin Senekowitsch; Michael Schuster; Petr Triska; Thomas Penz                                                                                                                                                                                                                                                                                                                                                                           |
| EPI_ISL_1678790, EPI_ISL_1678810                                                                                                                                                                                                                                                                                                                                                                                                                                                                                                                                                                                                                                                                                                                                                                                                                                | Department of Medical Microbiology & Infection prevention, Amsterdam University Medical Centers location AMC                                                                            | Department of Medical Microbiology & Infection prevention, Amsterdam University Medical Centers location AMC                                                                            | Fokla Zorgdrager; Janke Schinkel; Marcel Jonges; Matthijs Welkers; Menno de Jong; Robin van Houdt; Sebastien Matamoros; Sjoerd Rebers                                                                                                                                                                                                                                                                                                                                                                                                                                             |
| EPI_ISL_2547336, EPI_ISL_2547337, EPI_ISL_2547339, EPI_ISL_2547429, EPI_ISL_2547522                                                                                                                                                                                                                                                                                                                                                                                                                                                                                                                                                                                                                                                                                                                                                                             | Department of Medical Virology, School of Medicine Ahvaz Jundishapur University of Medical sciences                                                                                     | Genetics Research Center, University of Social Welfare and Rehabilitation Sciences                                                                                                      | Ahmad Tavakoli; Azaraksh Azaran; Farid yousefi; Hossein Najmabadi.; Kimia Kahrizi; Maryam Beheshtian; Marzieh Mohseni; Mohammad Farahmand; Mohsen Savaei; Seyed Mohammad Jazayeri; Zohreh Fattahi                                                                                                                                                                                                                                                                                                                                                                                 |
| EPI_ISL_497856, EPI_ISL_498271, EPI_ISL_1034423, EPI_ISL_1034489, EPI_ISL_1034665, EPI_ISL_1034714, EPI_ISL_2423555                                                                                                                                                                                                                                                                                                                                                                                                                                                                                                                                                                                                                                                                                                                                             | Department of Microbiology, The University of Hong Kong                                                                                                                                 | Department of Microbiology, The University of Hong Kong                                                                                                                                 | Kelvin K.W. To; Kwok-Yung Yuen                                                                                                                                                                                                                                                                                                                                                                                                                                                                                                                                                    |
| EPI_ISL_1540503, EPI_ISL_1540522                                                                                                                                                                                                                                                                                                                                                                                                                                                                                                                                                                                                                                                                                                                                                                                                                                | Department of Microbiology, University Hospital Motol                                                                                                                                   | Department of Microbiology, University Hospital Motol                                                                                                                                   | Ales Briksi; Katerina Chuda; Katerina Polackova; Klara Krivankova; Miroslav Zajac; Ondrej Cinek; Pavel Drevinek; Petr Hubacek                                                                                                                                                                                                                                                                                                                                                                                                                                                     |
| EPI_ISL_2536157                                                                                                                                                                                                                                                                                                                                                                                                                                                                                                                                                                                                                                                                                                                                                                                                                                                 | Department of Molecular Diagnostic, Emam Ali Educational and Therapeutic Center , Alborz University Medical Centers, Karaj, Iran                                                        | Genetics Research Center, University of Social Welfare and Rehabilitation Sciences                                                                                                      | Alireza Soleimani; Hossein Najmabadi.; Kimia Kahrizi; Maryam Beheshtian; Marzieh Mohseni; Mohammad Foad Abazari; Razieh Dowran; Saber Soltani; Shima Sadeghi; Zakiye Mokhames; Zohreh Fattahi                                                                                                                                                                                                                                                                                                                                                                                     |
| EPI_ISL_1164628, EPI_ISL_1164659, EPI_ISL_1164677, EPI_ISL_1164702, EPI_ISL_1164736                                                                                                                                                                                                                                                                                                                                                                                                                                                                                                                                                                                                                                                                                                                                                                             | Department of Molecular Virology, Cyprus Institute of Neurology and Genetics                                                                                                            | Department of Molecular Virology, Cyprus Institute of Neurology and Genetics                                                                                                            | Anastasis Oulas; Andreas Hadjisavvas; Christina Christodoulou; Christina Tryfonos; Dana Koptides; Denise Alexandrou; George Krashias; George Spyrou; Jan Richter; Maria Loizidou; Mihalis Panayiotidis; Olga Kalakouta; Pavlos Fanis; Stavros Bashiardes                                                                                                                                                                                                                                                                                                                          |
| EPI_ISL_1730064, EPI_ISL_1730071, EPI_ISL_1832202, EPI_ISL_1832205, EPI_ISL_1832216, EPI_ISL_1832228, EPI_ISL_1974779, EPI_ISL_2722110, EPI_ISL_2722197, EPI_ISL_2722358, EPI_ISL_2722481, EPI_ISL_2722537, EPI_ISL_2722597, EPI_ISL_2733926                                                                                                                                                                                                                                                                                                                                                                                                                                                                                                                                                                                                                    | Department of Pathology, University of Cambridge                                                                                                                                        | COVID-19 Genomics UK (COG-UK) Consortium                                                                                                                                                | Aminu S. Jahun; Ian Goodfellow; Iliana Georgana; Martin D. Curran; Myra Hosmillo; Rhys Izuagbe; Surendra Parmar; William L. Hamilton; Yasmin Chaudhry                                                                                                                                                                                                                                                                                                                                                                                                                             |
| see above                                                                                                                                                                                                                                                                                                                                                                                                                                                                                                                                                                                                                                                                                                                                                                                                                                                       |                                                                                                                                                                                         |                                                                                                                                                                                         |                                                                                                                                                                                                                                                                                                                                                                                                                                                                                                                                                                                   |
| EPI_ISL_450209                                                                                                                                                                                                                                                                                                                                                                                                                                                                                                                                                                                                                                                                                                                                                                                                                                                  | Department of Virology                                                                                                                                                                  | Department of Virology                                                                                                                                                                  | Ackermann, N.; Antwerpen, M.; Bengs, K.; Berger, A.; Boehm, S.; Boehmer; Boender; Buchholz, U.; Cai, W.; Corman, D.V.; Dangel, A.; Drosten, C.; Eberle, U.; Fingerle, V.; Grähl, A.; Haas, W.; Hamouda, O.; Hoch, M.; Hoermansdorfer, S.; Ippisch, S.; Jones, Katz, K.; Konrad, R.; Liebl, B.; M.M.; Marosevic; Muehleemann, B.; Muller, N.; Poertner, K.; Protzer, U.; Reich, A.; Rexroth, U.; Schneider, J.; Sing, A.; T.C.; T.S.; Treis, B.; V.M.; Veith, T.; Walter, M.; Wicklein, B.; Woelfel, R.; Woudenberg, T.; Zapf, A.; Zeitlmann, N.; an der Heiden, M.                |
| EPI_ISL_862065, EPI_ISL_862115, EPI_ISL_902774, EPI_ISL_1595794, EPI_ISL_1841715, EPI_ISL_1841947, EPI_ISL_1842089, EPI_ISL_1842217, EPI_ISL_2258787, EPI_ISL_2604325, EPI_ISL_2604421, EPI_ISL_2604692, EPI_ISL_2608769, EPI_ISL_2608773, EPI_ISL_2608785, EPI_ISL_2608883, EPI_ISL_2608938, EPI_ISL_2609354                                                                                                                                                                                                                                                                                                                                                                                                                                                                                                                                                   | Department of Virology and Immunology, University of Helsinki and Helsinki University Hospital, HUSlab Finland                                                                          | Department of Virology, Faculty of Medicine, University of Helsinki, Helsinki, Finland                                                                                                  | Essi Korhonen; Hanna Jarva; Hanna Liimatainen; Hannimari Kallio-Kokko; Harri Kangas; Hussein Alburkat; Jenni Virtanen; Maija Lappalainen; Maija Suvanto; Olli Vapalahti; Pekka Ellonen; Phuoc Truong; Ravi Kant; Sari Hannula; Satu Kurkela; Teemu Smura; fathiah Zakham                                                                                                                                                                                                                                                                                                          |
| EPI_ISL_2254718                                                                                                                                                                                                                                                                                                                                                                                                                                                                                                                                                                                                                                                                                                                                                                                                                                                 | Department of Virology, School of Medicine, Shiraz University of Medical Sciences, Shiraz, Iran                                                                                         | Genetics Research Center, University of Social Welfare and Rehabilitation Sciences                                                                                                      | Hossein Najmabadi.; Kimia Kahrizi; Marzieh Mohseni; Moattari A; Moghadami M; Zohreh Fattahi                                                                                                                                                                                                                                                                                                                                                                                                                                                                                       |
| EPI_ISL_1858833, EPI_ISL_1860885, EPI_ISL_1861168, EPI_ISL_1865192, EPI_ISL_1866210, EPI_ISL_1868349, EPI_ISL_1868655, EPI_ISL_1868943, EPI_ISL_1869673, EPI_ISL_1870726, EPI_ISL_1871129, EPI_ISL_1871787, EPI_ISL_1872528, EPI_ISL_1873137, EPI_ISL_1874259, EPI_ISL_1875582, EPI_ISL_1875917, EPI_ISL_1877615, EPI_ISL_1881208, EPI_ISL_1881663, EPI_ISL_1885762, EPI_ISL_1885979, EPI_ISL_1888026, EPI_ISL_1890934, EPI_ISL_1893878, EPI_ISL_1896403, EPI_ISL_1896405, EPI_ISL_2023939, EPI_ISL_2024372, EPI_ISL_2024988, EPI_ISL_2024994, EPI_ISL_2025050, EPI_ISL_2025253, EPI_ISL_2025326, EPI_ISL_2025835, EPI_ISL_2026084, EPI_ISL_2026230, EPI_ISL_2026527, EPI_ISL_2026729, EPI_ISL_2026828, EPI_ISL_2027124, EPI_ISL_2027238, EPI_ISL_2027359, EPI_ISL_2027667, EPI_ISL_2027848, EPI_ISL_2028708, EPI_ISL_2028728, EPI_ISL_2028832, EPI_ISL_2299602 | Department of Virus and Microbiological Special Diagnostics, Statens Serum Institut, Copenhagen, Denmark                                                                                | Aalborg University                                                                                                                                                                      | Danish Covid-19 Genome Consortium                                                                                                                                                                                                                                                                                                                                                                                                                                                                                                                                                 |
| see above                                                                                                                                                                                                                                                                                                                                                                                                                                                                                                                                                                                                                                                                                                                                                                                                                                                       |                                                                                                                                                                                         |                                                                                                                                                                                         |                                                                                                                                                                                                                                                                                                                                                                                                                                                                                                                                                                                   |
| EPI_ISL_614573, EPI_ISL_616194, EPI_ISL_616403, EPI_ISL_616601, EPI_ISL_622178,                                                                                                                                                                                                                                                                                                                                                                                                                                                                                                                                                                                                                                                                                                                                                                                 | Department of Virus and Microbiological Special Diagnostics, Statens Serum Institut, Denmark                                                                                            | Albertsen lab, Department of Chemistry and Bioscience, Aalborg University, Denmark                                                                                                      | Danish Covid-19 Genome Consortia                                                                                                                                                                                                                                                                                                                                                                                                                                                                                                                                                  |

|                                                                                                                                                                                                                                                                                                                                                                                                                                                                                                                                                                                                                                                                                                                                                                                                                                                                                                                                                                                                                                                                                                                                                                                                                                                                                                                                                                                                                                                                                                                                                                                                                                                                                                                                                                                                                                                                                                                                                                                                                                                                                                                                                                                                                                                                                                                                                                                                                                                                                                                                                                                                                                                                                                                                                                                                                                                                                                                                                                                                                                                                                                                                                                                                                                                                                                                                                                                                                                                                                                                                                                                                                                                                                                                                                                                                                                                                                                                                                                                                                                                                                                                                                                                                                                                                                                                                                                                                                                                                                                                                                                                                                                                                                                                                                                                                                                                                                                                                                                                                                                                                                                                                                                                                                                                                                                                                                                                                                                                                                                                                                                                                                                                                                                                                                                                                                                                                                                                                                                                                                                                                                                                                                                                                                                                                                                                                                                                                                                                                                                                                                                                                                                                                                                                                                                                                                                                                                                                                                                                                                                                                                                                                                                                                                                                                                                                                                                                                                                                                                                                                                                                                                                                                                                                                                                                                                                                                                                                                                                                                                                                                                                                                                                                                                                                                                                                                                                                                                                                                                                                                                                                                                                                                                                                                                                                                                                                                                                                                                                                                                                                                                                                                                                                                                                                                                                                                                                                                                                                                                                                                                                                                                                                                                                                                                                                                                                                                                                                                                                                                                                                                                                                                                                                                                                                                                                                                                                                                                                                                                                                                                                                                                                                                                                                                                                                                                                                                                                                                                                                                                                                                                                                                                                                                                                                                                                                                                                                                                                                                                                                                                                                                                                                                                                                                                                                                                                                                                         |                                                                                                                                                       |                                                                                                                                                                  |                                                                                                                                                                                                                                                                                                                                                                                                                                                                                                                                                                                                                              |
|-----------------------------------------------------------------------------------------------------------------------------------------------------------------------------------------------------------------------------------------------------------------------------------------------------------------------------------------------------------------------------------------------------------------------------------------------------------------------------------------------------------------------------------------------------------------------------------------------------------------------------------------------------------------------------------------------------------------------------------------------------------------------------------------------------------------------------------------------------------------------------------------------------------------------------------------------------------------------------------------------------------------------------------------------------------------------------------------------------------------------------------------------------------------------------------------------------------------------------------------------------------------------------------------------------------------------------------------------------------------------------------------------------------------------------------------------------------------------------------------------------------------------------------------------------------------------------------------------------------------------------------------------------------------------------------------------------------------------------------------------------------------------------------------------------------------------------------------------------------------------------------------------------------------------------------------------------------------------------------------------------------------------------------------------------------------------------------------------------------------------------------------------------------------------------------------------------------------------------------------------------------------------------------------------------------------------------------------------------------------------------------------------------------------------------------------------------------------------------------------------------------------------------------------------------------------------------------------------------------------------------------------------------------------------------------------------------------------------------------------------------------------------------------------------------------------------------------------------------------------------------------------------------------------------------------------------------------------------------------------------------------------------------------------------------------------------------------------------------------------------------------------------------------------------------------------------------------------------------------------------------------------------------------------------------------------------------------------------------------------------------------------------------------------------------------------------------------------------------------------------------------------------------------------------------------------------------------------------------------------------------------------------------------------------------------------------------------------------------------------------------------------------------------------------------------------------------------------------------------------------------------------------------------------------------------------------------------------------------------------------------------------------------------------------------------------------------------------------------------------------------------------------------------------------------------------------------------------------------------------------------------------------------------------------------------------------------------------------------------------------------------------------------------------------------------------------------------------------------------------------------------------------------------------------------------------------------------------------------------------------------------------------------------------------------------------------------------------------------------------------------------------------------------------------------------------------------------------------------------------------------------------------------------------------------------------------------------------------------------------------------------------------------------------------------------------------------------------------------------------------------------------------------------------------------------------------------------------------------------------------------------------------------------------------------------------------------------------------------------------------------------------------------------------------------------------------------------------------------------------------------------------------------------------------------------------------------------------------------------------------------------------------------------------------------------------------------------------------------------------------------------------------------------------------------------------------------------------------------------------------------------------------------------------------------------------------------------------------------------------------------------------------------------------------------------------------------------------------------------------------------------------------------------------------------------------------------------------------------------------------------------------------------------------------------------------------------------------------------------------------------------------------------------------------------------------------------------------------------------------------------------------------------------------------------------------------------------------------------------------------------------------------------------------------------------------------------------------------------------------------------------------------------------------------------------------------------------------------------------------------------------------------------------------------------------------------------------------------------------------------------------------------------------------------------------------------------------------------------------------------------------------------------------------------------------------------------------------------------------------------------------------------------------------------------------------------------------------------------------------------------------------------------------------------------------------------------------------------------------------------------------------------------------------------------------------------------------------------------------------------------------------------------------------------------------------------------------------------------------------------------------------------------------------------------------------------------------------------------------------------------------------------------------------------------------------------------------------------------------------------------------------------------------------------------------------------------------------------------------------------------------------------------------------------------------------------------------------------------------------------------------------------------------------------------------------------------------------------------------------------------------------------------------------------------------------------------------------------------------------------------------------------------------------------------------------------------------------------------------------------------------------------------------------------------------------------------------------------------------------------------------------------------------------------------------------------------------------------------------------------------------------------------------------------------------------------------------------------------------------------------------------------------------------------------------------------------------------------------------------------------------------------------------------------------------------------------------------------------------------------------------------------------------------------------------------------------------------------------------------------------------------------------------------------------------------------------------------------------------------------------------------------------------------------------------------------------------------------------------------------------------------------------------------------------------------------------------------------------------------------------------------------------------------------------------------------------------------------------------------------------------------------------------------------------------------------------------------------------------------------------------------------------------------------------------------------------------------------------------------------------------------------------------------------------------------------------------------------------------------------------------------------------------------------------------------------------------------------------------------------------------------------------------------------------------------------------------------------------------------------------------------------------------------------------------------------------------------------------------------------------------------------------------------------------------------------------------------------------------------------------------------------------------------------------------------------------------------------------------------------------------------------------------------------------------------------------------------------------------------------------------------------------------------------------------------------------------------------------------------------------------------------------------------------------------------------------------------------------------------------------------------------------------------------------------------------------------------------------------------------------------------------------------------------------------------------------------------------------------------------------------------------------------------------------------------------------------------------------------------------------------------------------------------------------------------------------------------------------------------------------------------------------------------------------------------------------------------------------------------------------------------|-------------------------------------------------------------------------------------------------------------------------------------------------------|------------------------------------------------------------------------------------------------------------------------------------------------------------------|------------------------------------------------------------------------------------------------------------------------------------------------------------------------------------------------------------------------------------------------------------------------------------------------------------------------------------------------------------------------------------------------------------------------------------------------------------------------------------------------------------------------------------------------------------------------------------------------------------------------------|
| EPI_ISL_622600<br>EPI_ISL_1662291                                                                                                                                                                                                                                                                                                                                                                                                                                                                                                                                                                                                                                                                                                                                                                                                                                                                                                                                                                                                                                                                                                                                                                                                                                                                                                                                                                                                                                                                                                                                                                                                                                                                                                                                                                                                                                                                                                                                                                                                                                                                                                                                                                                                                                                                                                                                                                                                                                                                                                                                                                                                                                                                                                                                                                                                                                                                                                                                                                                                                                                                                                                                                                                                                                                                                                                                                                                                                                                                                                                                                                                                                                                                                                                                                                                                                                                                                                                                                                                                                                                                                                                                                                                                                                                                                                                                                                                                                                                                                                                                                                                                                                                                                                                                                                                                                                                                                                                                                                                                                                                                                                                                                                                                                                                                                                                                                                                                                                                                                                                                                                                                                                                                                                                                                                                                                                                                                                                                                                                                                                                                                                                                                                                                                                                                                                                                                                                                                                                                                                                                                                                                                                                                                                                                                                                                                                                                                                                                                                                                                                                                                                                                                                                                                                                                                                                                                                                                                                                                                                                                                                                                                                                                                                                                                                                                                                                                                                                                                                                                                                                                                                                                                                                                                                                                                                                                                                                                                                                                                                                                                                                                                                                                                                                                                                                                                                                                                                                                                                                                                                                                                                                                                                                                                                                                                                                                                                                                                                                                                                                                                                                                                                                                                                                                                                                                                                                                                                                                                                                                                                                                                                                                                                                                                                                                                                                                                                                                                                                                                                                                                                                                                                                                                                                                                                                                                                                                                                                                                                                                                                                                                                                                                                                                                                                                                                                                                                                                                                                                                                                                                                                                                                                                                                                                                                                                                                                       | Dept. Of Microbiology, Lt.. Baliram Kashyap Memorial Govt. Medical college, Dimrapal, Jagdalpur                                                       | Institute of Life Sciences - INSACOG                                                                                                                             | Ajay Parida; Amol M. Kanampaliwar; Arup Ghosh; Atimukta Jha; INSACOG Consortium; Punit Prasad; Rajeeb Swain; Rupesh Dash; Safal Walia; Shifu Aggarwal; Sunil K. Raghav                                                                                                                                                                                                                                                                                                                                                                                                                                                       |
| EPI_ISL_2614418<br>EPI_ISL_774897<br>EPI_ISL_2080488                                                                                                                                                                                                                                                                                                                                                                                                                                                                                                                                                                                                                                                                                                                                                                                                                                                                                                                                                                                                                                                                                                                                                                                                                                                                                                                                                                                                                                                                                                                                                                                                                                                                                                                                                                                                                                                                                                                                                                                                                                                                                                                                                                                                                                                                                                                                                                                                                                                                                                                                                                                                                                                                                                                                                                                                                                                                                                                                                                                                                                                                                                                                                                                                                                                                                                                                                                                                                                                                                                                                                                                                                                                                                                                                                                                                                                                                                                                                                                                                                                                                                                                                                                                                                                                                                                                                                                                                                                                                                                                                                                                                                                                                                                                                                                                                                                                                                                                                                                                                                                                                                                                                                                                                                                                                                                                                                                                                                                                                                                                                                                                                                                                                                                                                                                                                                                                                                                                                                                                                                                                                                                                                                                                                                                                                                                                                                                                                                                                                                                                                                                                                                                                                                                                                                                                                                                                                                                                                                                                                                                                                                                                                                                                                                                                                                                                                                                                                                                                                                                                                                                                                                                                                                                                                                                                                                                                                                                                                                                                                                                                                                                                                                                                                                                                                                                                                                                                                                                                                                                                                                                                                                                                                                                                                                                                                                                                                                                                                                                                                                                                                                                                                                                                                                                                                                                                                                                                                                                                                                                                                                                                                                                                                                                                                                                                                                                                                                                                                                                                                                                                                                                                                                                                                                                                                                                                                                                                                                                                                                                                                                                                                                                                                                                                                                                                                                                                                                                                                                                                                                                                                                                                                                                                                                                                                                                                                                                                                                                                                                                                                                                                                                                                                                                                                                                                                                                    | Dept. of Laboratory Medicine<br>Designated Reference Institute for Chemical Measurements (DRICM)<br>Diagnofirm Medical Laboratories                   | Dept. of Laboratory Medicine<br>DNA SOLUTION LTD.<br>Botswana Harvard HIV Reference Laboratory                                                                   | Anna Gschaidler; Claudia Weber; Fabian Konig; Harald Esterbauer; Oswald Wagner; Petra Jurkowski; Robert Strassi; Sabina Plumer<br>Abdul Khaleque; Abu Sufian; Hasan Ul Haider; Jannatun Naima; Kazi Nadim Hasan; MSM Chowdhury; Mala Khan; Mamdul Hasan Razu; Md. Imran Khan; Mizanur Rahman; Mohammad Fazle Alam Rabbi<br>Boitumelo Zuze; Botshelo Radibe; Dorcas Maruapula; Joseph Makhema; Keoratlile Mtshambila; Kgomotso Moruši; Legodile Kooepile; Madisa Mine; Mosepele Mosepele; Pamela Smith-Lawrence; Roger Shapiro; Shahin Lockman; Sikhulile Moyo; Simani Gaseletswi; Thongbotho Mphokagkosi; Wonderful T. Choga |
| EPI_ISL_1447349<br>EPI_ISL_1447360<br>EPI_ISL_2115134<br>EPI_ISL_2115136<br>EPI_ISL_2115142<br>EPI_ISL_2115145<br>EPI_ISL_2047571<br>EPI_ISL_2233090<br>EPI_ISL_2341996<br>EPI_ISL_2324047<br>EPI_ISL_2342122<br>EPI_ISL_2342262<br>EPI_ISL_2342281<br>EPI_ISL_2342291                                                                                                                                                                                                                                                                                                                                                                                                                                                                                                                                                                                                                                                                                                                                                                                                                                                                                                                                                                                                                                                                                                                                                                                                                                                                                                                                                                                                                                                                                                                                                                                                                                                                                                                                                                                                                                                                                                                                                                                                                                                                                                                                                                                                                                                                                                                                                                                                                                                                                                                                                                                                                                                                                                                                                                                                                                                                                                                                                                                                                                                                                                                                                                                                                                                                                                                                                                                                                                                                                                                                                                                                                                                                                                                                                                                                                                                                                                                                                                                                                                                                                                                                                                                                                                                                                                                                                                                                                                                                                                                                                                                                                                                                                                                                                                                                                                                                                                                                                                                                                                                                                                                                                                                                                                                                                                                                                                                                                                                                                                                                                                                                                                                                                                                                                                                                                                                                                                                                                                                                                                                                                                                                                                                                                                                                                                                                                                                                                                                                                                                                                                                                                                                                                                                                                                                                                                                                                                                                                                                                                                                                                                                                                                                                                                                                                                                                                                                                                                                                                                                                                                                                                                                                                                                                                                                                                                                                                                                                                                                                                                                                                                                                                                                                                                                                                                                                                                                                                                                                                                                                                                                                                                                                                                                                                                                                                                                                                                                                                                                                                                                                                                                                                                                                                                                                                                                                                                                                                                                                                                                                                                                                                                                                                                                                                                                                                                                                                                                                                                                                                                                                                                                                                                                                                                                                                                                                                                                                                                                                                                                                                                                                                                                                                                                                                                                                                                                                                                                                                                                                                                                                                                                                                                                                                                                                                                                                                                                                                                                                                                                                                                                                                  | Diagnostic and Research Center of Infectious Diseases, Medical Faculty, Andalas University<br>Dianovis GmbH Greiz                                     | Diagnostic and Research Center of Infectious Diseases, Medical Faculty, Andalas University<br>Robert Koch Institute                                              | Andani Eka Putra; Ayu Novita Trisnawati; Dede Rahman Agustian; Desmawati; Dessy Arisanty; Gustinia Alkha; Ikwhan R. Sudji; Juane Plantika Menra; Linosefa; Mutia Lailani; Nia Ayuni Putri; Nita Afriani; SM Rezvi; Sekar Asri Tresnaningtyas; Siskali Azhim; Syafiaziranyati; Syandrez Prima Putra; Yolani Syaputri                                                                                                                                                                                                                                                                                                          |
| EPI_ISL_2342038<br>EPI_ISL_2342065<br>EPI_ISL_2342070<br>EPI_ISL_2342073<br>EPI_ISL_2342079<br>EPI_ISL_2342086<br>EPI_ISL_2342299<br>EPI_ISL_2342301<br>EPI_ISL_2342302<br>EPI_ISL_2342303<br>EPI_ISL_2342304<br>EPI_ISL_2342305<br>EPI_ISL_2342306                                                                                                                                                                                                                                                                                                                                                                                                                                                                                                                                                                                                                                                                                                                                                                                                                                                                                                                                                                                                                                                                                                                                                                                                                                                                                                                                                                                                                                                                                                                                                                                                                                                                                                                                                                                                                                                                                                                                                                                                                                                                                                                                                                                                                                                                                                                                                                                                                                                                                                                                                                                                                                                                                                                                                                                                                                                                                                                                                                                                                                                                                                                                                                                                                                                                                                                                                                                                                                                                                                                                                                                                                                                                                                                                                                                                                                                                                                                                                                                                                                                                                                                                                                                                                                                                                                                                                                                                                                                                                                                                                                                                                                                                                                                                                                                                                                                                                                                                                                                                                                                                                                                                                                                                                                                                                                                                                                                                                                                                                                                                                                                                                                                                                                                                                                                                                                                                                                                                                                                                                                                                                                                                                                                                                                                                                                                                                                                                                                                                                                                                                                                                                                                                                                                                                                                                                                                                                                                                                                                                                                                                                                                                                                                                                                                                                                                                                                                                                                                                                                                                                                                                                                                                                                                                                                                                                                                                                                                                                                                                                                                                                                                                                                                                                                                                                                                                                                                                                                                                                                                                                                                                                                                                                                                                                                                                                                                                                                                                                                                                                                                                                                                                                                                                                                                                                                                                                                                                                                                                                                                                                                                                                                                                                                                                                                                                                                                                                                                                                                                                                                                                                                                                                                                                                                                                                                                                                                                                                                                                                                                                                                                                                                                                                                                                                                                                                                                                                                                                                                                                                                                                                                                                                                                                                                                                                                                                                                                                                                                                                                                                                                                                                                     | Dinas Kesehatan Kab Blitar<br>Dinkes Samarinda<br>District Head Quarters Hospital, Nayagarh                                                           | National Institute of Health Research and Development<br>National Institute of Health Research and Development<br>Institute of Life Sciences - INSACOG           | Arie Ardiansyah Nugraha; Hana Aparsi Pawestri; Hartanti Dian Ikawati; Kartika Dewi Puspa; Krisna Pangesti; Nelly Puspandari; Subangkit; Triyani Soekarso; Vivi Setiawaty<br>Arie Ardiansyah Nugraha; Hana Aparsi Pawestri; Hartanti Dian Ikawati; Kartika Dewi Puspa; Krisna Pangesti; Nelly Puspandari; Subangkit; Triyani Soekarso; Vivi Setiawaty<br>Ajay Parida; Amol M. Kanampaliwar; Arup Ghosh; Atimukta Jha; INSACOG Consortium; Omprakash Shiriwas; Punit Prasad; Rajeeb Swain; Rupesh Dash; Safal Walia; Sana Fatma; Shifu Aggarwal; Sunil K. Raghav                                                               |
| see above<br>EPI_ISL_2342100<br>EPI_ISL_2342286<br>EPI_ISL_2342289                                                                                                                                                                                                                                                                                                                                                                                                                                                                                                                                                                                                                                                                                                                                                                                                                                                                                                                                                                                                                                                                                                                                                                                                                                                                                                                                                                                                                                                                                                                                                                                                                                                                                                                                                                                                                                                                                                                                                                                                                                                                                                                                                                                                                                                                                                                                                                                                                                                                                                                                                                                                                                                                                                                                                                                                                                                                                                                                                                                                                                                                                                                                                                                                                                                                                                                                                                                                                                                                                                                                                                                                                                                                                                                                                                                                                                                                                                                                                                                                                                                                                                                                                                                                                                                                                                                                                                                                                                                                                                                                                                                                                                                                                                                                                                                                                                                                                                                                                                                                                                                                                                                                                                                                                                                                                                                                                                                                                                                                                                                                                                                                                                                                                                                                                                                                                                                                                                                                                                                                                                                                                                                                                                                                                                                                                                                                                                                                                                                                                                                                                                                                                                                                                                                                                                                                                                                                                                                                                                                                                                                                                                                                                                                                                                                                                                                                                                                                                                                                                                                                                                                                                                                                                                                                                                                                                                                                                                                                                                                                                                                                                                                                                                                                                                                                                                                                                                                                                                                                                                                                                                                                                                                                                                                                                                                                                                                                                                                                                                                                                                                                                                                                                                                                                                                                                                                                                                                                                                                                                                                                                                                                                                                                                                                                                                                                                                                                                                                                                                                                                                                                                                                                                                                                                                                                                                                                                                                                                                                                                                                                                                                                                                                                                                                                                                                                                                                                                                                                                                                                                                                                                                                                                                                                                                                                                                                                                                                                                                                                                                                                                                                                                                                                                                                                                                                                                      | District Headquarter Hospital, Puri<br>District Headquarters Hospital, Deogarh                                                                        | Institute of Life Sciences - INSACOG<br>Institute of Life Sciences - INSACOG                                                                                     | Ajay Parida; Amol M. Kanampaliwar; Arup Ghosh; Atimukta Jha; INSACOG Consortium; Omprakash Shiriwas; Punit Prasad; Rajeeb Swain; Rupesh Dash; Safal Walia; Sana Fatma; Shifu Aggarwal; Sunil K. Raghav<br>Ajay Parida; Amol M. Kanampaliwar; Arup Ghosh; Atimukta Jha; INSACOG Consortium; Omprakash Shiriwas; Punit Prasad; Rajeeb Swain; Rupesh Dash; Safal Walia; Sana Fatma; Shifu Aggarwal; Sunil K. Raghav                                                                                                                                                                                                             |
| EPI_ISL_2379462<br>EPI_ISL_2379464<br>EPI_ISL_2379465<br>EPI_ISL_2379467<br>EPI_ISL_2379468<br>EPI_ISL_2379469<br>EPI_ISL_2379470<br>EPI_ISL_2379471<br>EPI_ISL_2379472<br>EPI_ISL_2379473<br>EPI_ISL_2379476<br>EPI_ISL_2379477<br>EPI_ISL_2379478<br>EPI_ISL_2379479<br>EPI_ISL_2379480<br>EPI_ISL_2379481<br>EPI_ISL_2379486<br>EPI_ISL_2379488<br>EPI_ISL_2379491<br>EPI_ISL_2379493<br>EPI_ISL_2379494<br>EPI_ISL_2379496<br>EPI_ISL_2379497<br>EPI_ISL_2379498<br>EPI_ISL_2379499<br>EPI_ISL_2379500<br>EPI_ISL_2379501<br>EPI_ISL_2379502<br>EPI_ISL_2379503<br>EPI_ISL_2379504<br>EPI_ISL_2379505<br>EPI_ISL_2379506<br>EPI_ISL_2379507<br>EPI_ISL_2379508<br>EPI_ISL_2379509<br>EPI_ISL_2379510<br>EPI_ISL_2379511<br>EPI_ISL_2379512<br>EPI_ISL_2379513<br>EPI_ISL_2379514<br>EPI_ISL_2379515<br>EPI_ISL_2379516<br>EPI_ISL_2379517<br>EPI_ISL_2379518<br>EPI_ISL_2379519<br>EPI_ISL_2379520<br>EPI_ISL_2379521<br>EPI_ISL_2379522<br>EPI_ISL_2379523<br>EPI_ISL_2379524<br>EPI_ISL_2379525<br>EPI_ISL_2379526<br>EPI_ISL_2379527<br>EPI_ISL_2379528<br>EPI_ISL_2379529<br>EPI_ISL_2379530<br>EPI_ISL_2379531<br>EPI_ISL_2379532<br>EPI_ISL_2379533<br>EPI_ISL_2379534<br>EPI_ISL_2379535<br>EPI_ISL_2379536<br>EPI_ISL_2379537<br>EPI_ISL_2379538<br>EPI_ISL_2379539<br>EPI_ISL_2379540<br>EPI_ISL_2379541<br>EPI_ISL_2379543<br>EPI_ISL_2379544<br>EPI_ISL_2379545<br>EPI_ISL_2379550<br>EPI_ISL_2379558<br>EPI_ISL_2379559<br>EPI_ISL_2379560<br>EPI_ISL_2379561<br>EPI_ISL_2379562<br>EPI_ISL_2379563<br>EPI_ISL_2379564<br>EPI_ISL_2379565<br>EPI_ISL_2379566<br>EPI_ISL_2379567<br>EPI_ISL_2379568<br>EPI_ISL_2379569<br>EPI_ISL_2379570<br>EPI_ISL_2379571<br>EPI_ISL_2379572<br>EPI_ISL_2379573<br>EPI_ISL_2379574<br>EPI_ISL_2379575<br>EPI_ISL_2379576<br>EPI_ISL_2379577<br>EPI_ISL_2379578<br>EPI_ISL_2379579<br>EPI_ISL_2379580<br>EPI_ISL_2379581<br>EPI_ISL_2379582<br>EPI_ISL_2379583<br>EPI_ISL_2379584<br>EPI_ISL_2379585<br>EPI_ISL_2379586<br>EPI_ISL_2379587<br>EPI_ISL_2379588<br>EPI_ISL_2379589<br>EPI_ISL_2379590<br>EPI_ISL_2379591<br>EPI_ISL_2379592<br>EPI_ISL_2379593<br>EPI_ISL_2379594<br>EPI_ISL_2379595<br>EPI_ISL_2379596<br>EPI_ISL_2379597<br>EPI_ISL_2379598<br>EPI_ISL_2379599<br>EPI_ISL_2379600<br>EPI_ISL_2379601<br>EPI_ISL_2379602<br>EPI_ISL_2379603<br>EPI_ISL_2379604<br>EPI_ISL_2379605<br>EPI_ISL_2379606<br>EPI_ISL_2379607<br>EPI_ISL_2379608<br>EPI_ISL_2379609<br>EPI_ISL_2379610<br>EPI_ISL_2379611<br>EPI_ISL_2379612<br>EPI_ISL_2379613<br>EPI_ISL_2379614<br>EPI_ISL_2379615<br>EPI_ISL_2379616<br>EPI_ISL_2379617<br>EPI_ISL_2379618<br>EPI_ISL_2379619<br>EPI_ISL_2379620<br>EPI_ISL_2379621<br>EPI_ISL_2379622<br>EPI_ISL_2379623<br>EPI_ISL_2379624<br>EPI_ISL_2379625<br>EPI_ISL_2379626<br>EPI_ISL_2379627<br>EPI_ISL_2379628<br>EPI_ISL_2379629<br>EPI_ISL_2379630<br>EPI_ISL_2379631<br>EPI_ISL_2379632<br>EPI_ISL_2379633<br>EPI_ISL_2379634<br>EPI_ISL_2379635<br>EPI_ISL_2379636<br>EPI_ISL_2379637<br>EPI_ISL_2379638<br>EPI_ISL_2379639<br>EPI_ISL_2379640<br>EPI_ISL_2379641<br>EPI_ISL_2379642<br>EPI_ISL_2379643<br>EPI_ISL_2379644<br>EPI_ISL_2379645<br>EPI_ISL_2379646<br>EPI_ISL_2379647<br>EPI_ISL_2379648<br>EPI_ISL_2379649                                                                                                                                                                                                                                                                                                                                                                                                                                                                                                                                                                                                                                                                                                                                                                                                                                                                                                                                                                                                                                                                                                                                                                                                                                                                                                                                                                                                                                                                                                                                                                                                                                                                                                                                                                                                                                                                                                                                                                                                                                                                                                                                                                                                                                                                                                                                                                                                                                                                                                                                                                                                                                                                                                                                                                                                                                                                                                                                                                                                                                                                                                                                                                                                                                                                                                                                                                                                                                                                                                                                                                                                                                                                                                                                                                                                                                                                                                                                                                                                                                                                                                                                                                                                                                                                                                                                                                                                                                                                                                                                                                                                                                                                                                                                                                                                                                                                                                                                                                                                                                                                                                                                                                                                                                                                                                                                                                                                                                                                                                                                                                                                                                                                                                                                                                                                                                                                                                                                                                                                                                                                                                                                                                                                                                                                                                                                                                                                                                                                                                                                                                                                                                                                                                                                                                                                                                                                                                                                                                                                                                                                                                                                                                                                                                                                                                                                                                                                                                                                                                                                                                                                                                                                                                                                                                                                                                                                                                                                                                                                                                                                                                                                                                                                                                                                                                                                                                                                                                                                                                                                                                                                                                                                   | see above<br>Dr S Raju, Director of Public Health and Preventive Medicine<br>see above<br>Dr S Raju, Director of public heath and preventive medicine | Instem NCBS - INSACOG<br>Instem NCBS - INSACOG<br>Uma Ramakrishnan Dasaradhi Palakodeti Aswin SaiNarain<br>Uma Ramakrishnan Dasaradhi Palakodeti Aswin SaiNarain |                                                                                                                                                                                                                                                                                                                                                                                                                                                                                                                                                                                                                              |
| EPI_ISL_2521771<br>EPI_ISL_2521772<br>EPI_ISL_2521773<br>EPI_ISL_2521774<br>EPI_ISL_2521775<br>EPI_ISL_2521776<br>EPI_ISL_2521777<br>EPI_ISL_2521792<br>EPI_ISL_2521793<br>EPI_ISL_2521795<br>EPI_ISL_2521797<br>EPI_ISL_2521798<br>EPI_ISL_2521800<br>EPI_ISL_2521801<br>EPI_ISL_2521802<br>EPI_ISL_2521803<br>EPI_ISL_2521804<br>EPI_ISL_2521805<br>EPI_ISL_2521806<br>EPI_ISL_2521807<br>EPI_ISL_2521808<br>EPI_ISL_2521809<br>EPI_ISL_2521810<br>EPI_ISL_2521811<br>EPI_ISL_2521812<br>EPI_ISL_2521813<br>EPI_ISL_2521814<br>EPI_ISL_2521815<br>EPI_ISL_2521816<br>EPI_ISL_2521817<br>EPI_ISL_2521818<br>EPI_ISL_2521819<br>EPI_ISL_2521820<br>EPI_ISL_2521821<br>EPI_ISL_2521822<br>EPI_ISL_2521823<br>EPI_ISL_2521824<br>EPI_ISL_2521825<br>EPI_ISL_2521826<br>EPI_ISL_2521827<br>EPI_ISL_2521828<br>EPI_ISL_2521829<br>EPI_ISL_2521830<br>EPI_ISL_2521831<br>EPI_ISL_2521832<br>EPI_ISL_2521833<br>EPI_ISL_2521834<br>EPI_ISL_2521835<br>EPI_ISL_2521836<br>EPI_ISL_2521837<br>EPI_ISL_2521838<br>EPI_ISL_2521839<br>EPI_ISL_2521840<br>EPI_ISL_2521841<br>EPI_ISL_2521842<br>EPI_ISL_2521843<br>EPI_ISL_2521844<br>EPI_ISL_2521845<br>EPI_ISL_2521846<br>EPI_ISL_2521847<br>EPI_ISL_2521848<br>EPI_ISL_2521849<br>EPI_ISL_2521850<br>EPI_ISL_2521851<br>EPI_ISL_2521852<br>EPI_ISL_2521853<br>EPI_ISL_2521854<br>EPI_ISL_2521855<br>EPI_ISL_2521856<br>EPI_ISL_2521857<br>EPI_ISL_2521858<br>EPI_ISL_2521859<br>EPI_ISL_2521860<br>EPI_ISL_2521861<br>EPI_ISL_2521862<br>EPI_ISL_2521863<br>EPI_ISL_2521864<br>EPI_ISL_2521865<br>EPI_ISL_2521866<br>EPI_ISL_2521867<br>EPI_ISL_2521868<br>EPI_ISL_2521869<br>EPI_ISL_2521870<br>EPI_ISL_2521871<br>EPI_ISL_2521872<br>EPI_ISL_2521873<br>EPI_ISL_2521874<br>EPI_ISL_2521875<br>EPI_ISL_2521876<br>EPI_ISL_2521877<br>EPI_ISL_2521878<br>EPI_ISL_2521879<br>EPI_ISL_2521880<br>EPI_ISL_2521881<br>EPI_ISL_2521882<br>EPI_ISL_2521883<br>EPI_ISL_2521884<br>EPI_ISL_2521885<br>EPI_ISL_2521886<br>EPI_ISL_2521887<br>EPI_ISL_2521888<br>EPI_ISL_2521889<br>EPI_ISL_2521890<br>EPI_ISL_2521891<br>EPI_ISL_2521892<br>EPI_ISL_2521893<br>EPI_ISL_2521894<br>EPI_ISL_2521895<br>EPI_ISL_2521896<br>EPI_ISL_2521897<br>EPI_ISL_2521898<br>EPI_ISL_2521899<br>EPI_ISL_2521900<br>EPI_ISL_2521901<br>EPI_ISL_2521902<br>EPI_ISL_2521903<br>EPI_ISL_2521904<br>EPI_ISL_2521905<br>EPI_ISL_2521906<br>EPI_ISL_2521907<br>EPI_ISL_2521908<br>EPI_ISL_2521909<br>EPI_ISL_2521910<br>EPI_ISL_2521911<br>EPI_ISL_2521912<br>EPI_ISL_2521913<br>EPI_ISL_2521914<br>EPI_ISL_2521915<br>EPI_ISL_2521916<br>EPI_ISL_2521917<br>EPI_ISL_2521918<br>EPI_ISL_2521919<br>EPI_ISL_2521920<br>EPI_ISL_2521921<br>EPI_ISL_2521922<br>EPI_ISL_2521923<br>EPI_ISL_2521924<br>EPI_ISL_2521925<br>EPI_ISL_2521926<br>EPI_ISL_2521927<br>EPI_ISL_2521928<br>EPI_ISL_2521929<br>EPI_ISL_2521930<br>EPI_ISL_2521931<br>EPI_ISL_2521932<br>EPI_ISL_2521933<br>EPI_ISL_2521934<br>EPI_ISL_2521935<br>EPI_ISL_2521936<br>EPI_ISL_2521937<br>EPI_ISL_2521938<br>EPI_ISL_2521939<br>EPI_ISL_2521940<br>EPI_ISL_2521941<br>EPI_ISL_2521942<br>EPI_ISL_2521943<br>EPI_ISL_2521944<br>EPI_ISL_2521945<br>EPI_ISL_2521946<br>EPI_ISL_2521947<br>EPI_ISL_2521948<br>EPI_ISL_2521949<br>EPI_ISL_2521950<br>EPI_ISL_2521951<br>EPI_ISL_2521952<br>EPI_ISL_2521953<br>EPI_ISL_2521954<br>EPI_ISL_2521955<br>EPI_ISL_2521956<br>EPI_ISL_2521957<br>EPI_ISL_2521958<br>EPI_ISL_2521959<br>EPI_ISL_2521960<br>EPI_ISL_2521961<br>EPI_ISL_2521962<br>EPI_ISL_2521963<br>EPI_ISL_2521964<br>EPI_ISL_2521965<br>EPI_ISL_2521966<br>EPI_ISL_2521967<br>EPI_ISL_2521968<br>EPI_ISL_2521969<br>EPI_ISL_2521970<br>EPI_ISL_2521971<br>EPI_ISL_2521972<br>EPI_ISL_2521973<br>EPI_ISL_2521974<br>EPI_ISL_2521975<br>EPI_ISL_2521976<br>EPI_ISL_2521977<br>EPI_ISL_2521978<br>EPI_ISL_2521979<br>EPI_ISL_2521980<br>EPI_ISL_2521981<br>EPI_ISL_2521982<br>EPI_ISL_2521983<br>EPI_ISL_2521984<br>EPI_ISL_2521985<br>EPI_ISL_2521986<br>EPI_ISL_2521987<br>EPI_ISL_2521988<br>EPI_ISL_2521989<br>EPI_ISL_2521990<br>EPI_ISL_2521991<br>EPI_ISL_2521992<br>EPI_ISL_2521993<br>EPI_ISL_2521994<br>EPI_ISL_2521995<br>EPI_ISL_2521996<br>EPI_ISL_2521997<br>EPI_ISL_2521998<br>EPI_ISL_2521999<br>EPI_ISL_2522000<br>EPI_ISL_2522001<br>EPI_ISL_2522002<br>EPI_ISL_2522003<br>EPI_ISL_2522004<br>EPI_ISL_2522005<br>EPI_ISL_2522006<br>EPI_ISL_2522007<br>EPI_ISL_2522008<br>EPI_ISL_2522009<br>EPI_ISL_2522010<br>EPI_ISL_2522011<br>EPI_ISL_2522012<br>EPI_ISL_2522013<br>EPI_ISL_2522014<br>EPI_ISL_2522015<br>EPI_ISL_2522016<br>EPI_ISL_2522017<br>EPI_ISL_2522018<br>EPI_ISL_2522019<br>EPI_ISL_2522020<br>EPI_ISL_2522021<br>EPI_ISL_2522022<br>EPI_ISL_2522023<br>EPI_ISL_2522024<br>EPI_ISL_2522025<br>EPI_ISL_2522026<br>EPI_ISL_2522027<br>EPI_ISL_2522028<br>EPI_ISL_2522029<br>EPI_ISL_2522030<br>EPI_ISL_2522031<br>EPI_ISL_2522032<br>EPI_ISL_2522033<br>EPI_ISL_2522034<br>EPI_ISL_2522035<br>EPI_ISL_2522036<br>EPI_ISL_2522037<br>EPI_ISL_2522038<br>EPI_ISL_2522039<br>EPI_ISL_2522040<br>EPI_ISL_2522041<br>EPI_ISL_2522042<br>EPI_ISL_2522043<br>EPI_ISL_2522044<br>EPI_ISL_2522045<br>EPI_ISL_2522046<br>EPI_ISL_2522047<br>EPI_ISL_2522048<br>EPI_ISL_2522049<br>EPI_ISL_2522050<br>EPI_ISL_2522051<br>EPI_ISL_2522052<br>EPI_ISL_2522053<br>EPI_ISL_2522054<br>EPI_ISL_2522055<br>EPI_ISL_2522056<br>EPI_ISL_2522057<br>EPI_ISL_2522058<br>EPI_ISL_2522059<br>EPI_ISL_2522060<br>EPI_ISL_2522061<br>EPI_ISL_2522062<br>EPI_ISL_2522063<br>EPI_ISL_2522064<br>EPI_ISL_2522065<br>EPI_ISL_2522066<br>EPI_ISL_2522067<br>EPI_ISL_2522068<br>EPI_ISL_2522069<br>EPI_ISL_2522070<br>EPI_ISL_2522071<br>EPI_ISL_2522072<br>EPI_ISL_2522073<br>EPI_ISL_2522074<br>EPI_ISL_2522075<br>EPI_ISL_2522076<br>EPI_ISL_2522077<br>EPI_ISL_2522078<br>EPI_ISL_2522079<br>EPI_ISL_2522080<br>EPI_ISL_2522081<br>EPI_ISL_2522082<br>EPI_ISL_2522083<br>EPI_ISL_2522084<br>EPI_ISL_2522085<br>EPI_ISL_2522086<br>EPI_ISL_2522087<br>EPI_ISL_2522088<br>EPI_ISL_2522089<br>EPI_ISL_2522090<br>EPI_ISL_2522091<br>EPI_ISL_2522092<br>EPI_ISL_2522093<br>EPI_ISL_2522094<br>EPI_ISL_2522095<br>EPI_ISL_2522096<br>EPI_ISL_2522097<br>EPI_ISL_2522098<br>EPI_ISL_2522099<br>EPI_ISL_2522100<br>EPI_ISL_2522101<br>EPI_ISL_2522102<br>EPI_ISL_2522103<br>EPI_ISL_2522104<br>EPI_ISL_2522105<br>EPI_ISL_2522106<br>EPI_ISL_2522107<br>EPI_ISL_2522108<br>EPI_ISL_2522109<br>EPI_ISL_2522110<br>EPI_ISL_2522111<br>EPI_ISL_2522112<br>EPI_ISL_2522113<br>EPI_ISL_2522114<br>EPI_ISL_2522115<br>EPI_ISL_2522116<br>EPI_ISL_2522117<br>EPI_ISL_2522118<br>EPI_ISL_2522119<br>EPI_ISL_2522120<br>EPI_ISL_2522121<br>EPI_ISL_2522122<br>EPI_ISL_2522123<br>EPI_ISL_2522124<br>EPI_ISL_2522125<br>EPI_ISL_2522126<br>EPI_ISL_2522127<br>EPI_ISL_2522128<br>EPI_ISL_2522129<br>EPI_ISL_2522130<br>EPI_ISL_2522131<br>EPI_ISL_2522132<br>EPI_ISL_2522133<br>EPI_ISL_2522134<br>EPI_ISL_2522135<br>EPI_ISL_2522136<br>EPI_ISL_2522137<br>EPI_ISL_2522138<br>EPI_ISL_2522139<br>EPI_ISL_2522140<br>EPI_ISL_2522141<br>EPI_ISL_2522142<br>EPI_ISL_2522143<br>EPI_ISL_2522144<br>EPI_ISL_2522145<br>EPI_ISL_2522146<br>EPI_ISL_2522147<br>EPI_ISL_2522148<br>EPI_ISL_2522149<br>EPI_ISL_2522150<br>EPI_ISL_2522151<br>EPI_ISL_2522152<br>EPI_ISL_2522153<br>EPI_ISL_2522154<br>EPI_ISL_2522155<br>EPI_ISL_2522156<br>EPI_ISL_2522157<br>EPI_ISL_2522158<br>EPI_ISL_2522159<br>EPI_ISL_2522160<br>EPI_ISL_2522161<br>EPI_ISL_2522162<br>EPI_ISL_2522163<br>EPI_ISL_2522164<br>EPI_ISL_2522165<br>EPI_ISL_2522166<br>EPI_ISL_2522167<br>EPI_ISL_2522168<br>EPI_ISL_2522169<br>EPI_ISL_2522170<br>EPI_ISL_2522171<br>EPI_ISL_2522172<br>EPI_ISL_2522173<br>EPI_ISL_2522174<br>EPI_ISL_2522175<br>EPI_ISL_2522176<br>EPI_ISL_2522177<br>EPI_ISL_2522178<br>EPI_ISL_2522179<br>EPI_ISL_2522180<br>EPI_ISL_2522181<br>EPI_ISL_2522182<br>EPI_ISL_2522183<br>EPI_ISL_2522184<br>EPI_ISL_2522185<br>EPI_ISL_2522186<br>EPI_ISL_2522187<br>EPI_ISL_2522188<br>EPI_ISL_2522189<br>EPI_ISL_2522190<br>EPI_ISL_2522191<br>EPI_ISL_2522192<br>EPI_ISL_2522193<br>EPI_ISL_2522194<br>EPI_ISL_2522195<br>EPI_ISL_2522196<br>EPI_ISL_2522197<br>EPI_ISL_2522198<br>EPI_ISL_2522199<br>EPI_ISL_2522200<br>EPI_ISL_2522201<br>EPI_ISL_2522202<br>EPI_ISL_2522203<br>EPI_ISL_2522204<br>EPI_ISL_2522205<br>EPI_ISL_2522206<br>EPI_ISL_2522207<br>EPI_ISL_2522208<br>EPI_ISL_2522209<br>EPI_ISL_2522210<br>EPI_ISL_2522211<br>EPI_ISL_2522212<br>EPI_ISL_2522213<br>EPI_ISL_2522214<br>EPI_ISL_2522215<br>EPI_ISL_2522216<br>EPI_ISL_2522217<br>EPI_ISL_2522218<br>EPI_ISL_2522219<br>EPI_ISL_2522220<br>EPI_ISL_2522221<br>EPI_ISL_2522222<br>EPI_ISL_2522223<br>EPI_ISL_2522224<br>EPI_ISL_2522225<br>EPI_ISL_2522226<br>EPI_ISL_2522227<br>EPI_ISL_2522228<br>EPI_ISL_2522229<br>EPI_ISL_2522230<br>EPI_ISL_2522231<br>EPI_ISL_2522232<br>EPI_ISL_2522233<br>EPI_ISL_2522234<br>EPI_ISL_2522235<br>EPI_ISL_2522236<br>EPI_ISL_2522237<br>EPI_ISL_2522238<br>EPI_ISL_2522239<br>EPI_ISL_2522240<br>EPI_ISL_2522241<br>EPI_ISL_2522242<br>EPI_ISL_2522243<br>EPI_ISL_2522244<br>EPI_ISL_2522245<br>EPI_ISL_2522246<br>EPI_ISL_2522247<br>EPI_ISL_2522248<br>EPI_ISL_2522249<br>EPI_ISL_2522250<br>EPI_ISL_2522251<br>EPI_ISL_2522252<br>EPI_ISL_2522253<br>EPI_ISL_2522254<br>EPI_ISL_2522255<br>EPI_ISL_2522256<br>EPI_ISL_2522257<br>EPI_ISL_2522258<br>EPI_ISL_2522259<br>EPI_ISL_2522260<br>EPI_ISL_2522261<br>EPI_ISL_2522262<br>EPI_ISL_2522263<br>EPI_ISL_2522264<br>EPI_ISL_2522265<br>EPI_ISL_2522266<br>EPI_ISL_2522267<br>EPI_ISL_2522268<br>EPI_ISL_2522269<br>EPI_ISL_2522270<br>EPI_ISL_2522271<br>EPI_ISL_2522272<br>EPI_ISL_2522273<br>EPI_ISL_2522274<br>EPI_ISL_2522275<br>EPI_ISL_2522276<br>EPI_ISL_2522277<br>EPI_ISL_2522278<br>EPI_ISL_2522279<br>EPI_ISL_2522280<br>EPI_ISL_2522281<br>EPI_ISL_2522282<br>EPI_ISL_2522283<br>EPI_ISL_2522284<br>EPI_ISL_2522285<br>EPI_ISL_2522286<br>EPI_ISL_2522287<br>EPI_ISL_2522288<br>EPI_ISL_2522289<br>EPI_ISL_2522290<br>EPI_ISL_2522291<br>EPI_ISL_2522292<br>EPI_ISL_2522293<br>EPI_ISL_2522294<br>EPI_ISL_2522295<br>EPI_ISL_2522296<br>EPI_ISL_2522297<br>EPI_ISL_2522298<br>EPI_ISL_2522299<br>EPI_ISL_2522300<br>EPI_ISL_2522301<br>EPI_ISL_2522302<br>EPI_ISL_2522303<br>EPI_ISL_2522304<br>EPI_ISL_2522305<br>EPI_ISL_2522306<br>EPI_ISL_2522307<br>EPI_ISL_2522308<br>EPI_ISL_2522309<br>EPI_ISL_2522310<br>EPI_ISL_2522311<br>EPI_ISL_2522312<br>EPI_ISL_2522313<br>EPI_ISL_2522314<br>EPI_ISL_2522315<br>EPI_ISL_2522316<br>EPI_ISL_2522317<br>EPI_ISL_2522318<br>EPI_ISL_2522319<br>EPI_ISL_2522320<br>EPI_ISL_2522321<br>EPI_ISL_2522322<br>EPI_ISL_2522323<br>EPI_ISL_2522324<br>EPI_ISL_2522325<br>EPI_ISL_2522326<br>EPI_ISL_2522327<br>EPI_ISL_2522328<br>EPI_ISL_2522329<br>EPI_ISL_2522330<br>EPI_ISL_2522331<br>EPI_ISL_2522332<br>EPI_ISL_2522333<br>EPI_ISL_2522334<br>EPI_ISL_2522335<br>EPI_ISL_2522336<br>EPI_ISL_2522337<br>EPI_ISL_2522338<br>EPI_ISL_2522339<br>EPI_ISL_2522340<br>EPI_ISL_2522341<br>EPI_ISL_2522342<br>EPI_ISL_2522343<br>EPI_ISL_2522344<br>EPI_ISL_2522345<br>EPI_ISL_2522346<br>EPI_ISL_2522347<br>EPI_ISL_2522348<br>EPI_ISL_2522349<br>EPI_ISL_2522350<br>EPI_ISL_2522351<br>EPI_ISL_2522352<br>EPI_ISL_2522353<br>EPI_ISL_2522354<br>EPI_ISL_2522355<br>EPI_ISL_2522356<br>EPI_ISL_2522357<br>EPI_ISL_2522358<br>EPI_ISL_2522359<br>EPI_ISL_2522360<br>EPI_ISL_2522361<br>EPI_ISL_2522362<br>EPI_ISL_2522363<br>EPI_ISL_2522364<br>EPI_ISL_2522365<br>EPI_ISL_2522366<br>EPI_ISL_2522367<br>EPI_ISL_2522368<br>EPI_ISL_2522369<br>EPI_ISL_2522370<br>EPI_ISL_2522371<br>EPI_ISL_2522372<br>EPI_ISL_2522373<br>EPI_ISL_2522374<br>EPI_ISL_2522375<br>EPI_ISL_2522376<br>EPI_ISL_2522377<br>EPI_ISL_2522378<br>EPI_ISL_2522379<br>EPI_ISL_2522380<br>EPI_ISL_2522381<br>EPI_ISL_2522382<br>EPI_ISL_2522383<br>EPI_ISL_2522384<br>EPI_ISL_2522385<br>EPI_ISL_2522386<br>EPI_ISL_2522387<br>EPI_ISL_2522388 |                                                                                                                                                       |                                                                                                                                                                  |                                                                                                                                                                                                                                                                                                                                                                                                                                                                                                                                                                                                                              |

|                                                                                                                                                                                                                                                                                                                                                                                                                                                                                                                                                                                                                                                                                                                                                                                                                            |                                                                                                                                                                        |                                                                                                                                                                                                                                                                                                                                                                                                                                                                                                                                                                                                                                                                                                                         |                                                                                                                                                                                                                                                                                                                                                                                                                                                                                                                                                                  |
|----------------------------------------------------------------------------------------------------------------------------------------------------------------------------------------------------------------------------------------------------------------------------------------------------------------------------------------------------------------------------------------------------------------------------------------------------------------------------------------------------------------------------------------------------------------------------------------------------------------------------------------------------------------------------------------------------------------------------------------------------------------------------------------------------------------------------|------------------------------------------------------------------------------------------------------------------------------------------------------------------------|-------------------------------------------------------------------------------------------------------------------------------------------------------------------------------------------------------------------------------------------------------------------------------------------------------------------------------------------------------------------------------------------------------------------------------------------------------------------------------------------------------------------------------------------------------------------------------------------------------------------------------------------------------------------------------------------------------------------------|------------------------------------------------------------------------------------------------------------------------------------------------------------------------------------------------------------------------------------------------------------------------------------------------------------------------------------------------------------------------------------------------------------------------------------------------------------------------------------------------------------------------------------------------------------------|
| EPI_ISL_684666<br>EPI_ISL_1182578                                                                                                                                                                                                                                                                                                                                                                                                                                                                                                                                                                                                                                                                                                                                                                                          | Fukuoka Institute of Health and Environmental Sciences<br>Fundação Ezequiel Dias (FUNED)                                                                               | Pathogen Genomics Center, National Institute of Infectious Diseases<br>Coordenação Geral de Laboratórios de Saúde Pública<br>(CGLAB/DAEVs/SVS/MS)                                                                                                                                                                                                                                                                                                                                                                                                                                                                                                                                                                       | Kentaro Itokawa; Makoto Kuroda; Masanori Hashino; Rina Tanaka; Tsuyoshi Sekizuka<br>Vagner Fonseca; et al.                                                                                                                                                                                                                                                                                                                                                                                                                                                       |
| EPI_ISL_2228933                                                                                                                                                                                                                                                                                                                                                                                                                                                                                                                                                                                                                                                                                                                                                                                                            | GH A.CHENEVIER-H.MONDOR                                                                                                                                                | Department of Virology, Henri Mondor University Hospital, Assistance<br>Publique Hôpitaux de Paris, Université Paris-Est Créteil, INSERM U955                                                                                                                                                                                                                                                                                                                                                                                                                                                                                                                                                                           | Alexandre Soulier; Christophe Rodriguez; Elisabeth Trawinski; Guillaume Gricourt; Jean-Michel Pawlotsky; Melissa N'Debi; Slim Fourati; Vanessa Demontant                                                                                                                                                                                                                                                                                                                                                                                                         |
| EPI_ISL_1755093                                                                                                                                                                                                                                                                                                                                                                                                                                                                                                                                                                                                                                                                                                                                                                                                            | GH JOFFRE DUPUTYREN                                                                                                                                                    | Department of Virology, Henri Mondor University Hospital, Assistance<br>Publique Hôpitaux de Paris, Université Paris-Est Créteil, INSERM U955                                                                                                                                                                                                                                                                                                                                                                                                                                                                                                                                                                           | Alexandre Soulier; Christophe Rodriguez; Elisabeth Trawinski; Guillaume Gricourt; Jean-Michel Pawlotsky; Melissa N'Debi; Slim Fourati; Vanessa Demontant                                                                                                                                                                                                                                                                                                                                                                                                         |
| EPI_ISL_2544813,<br>EPI_ISL_2544814,<br>EPI_ISL_2544815                                                                                                                                                                                                                                                                                                                                                                                                                                                                                                                                                                                                                                                                                                                                                                    | GMERS Government Medical College (GMC), Gandhinagar                                                                                                                    | Gujarat Biotechnology Research Centre                                                                                                                                                                                                                                                                                                                                                                                                                                                                                                                                                                                                                                                                                   | Chaitanya Joshi; Dinesh Kumar; Gaurishankar Shrimali; Janvi Raval; Madhvi Joshi; Nitesh Shah; Nitin Savaliya; Ramesh Pandit; Sonal Sharma; Twinkle Soni; Umang Mishra; Zarna Patel; Zuber Saiyed                                                                                                                                                                                                                                                                                                                                                                 |
| EPI_ISL_2405125,<br>EPI_ISL_2405126,<br>EPI_ISL_2509959,<br>EPI_ISL_2544836                                                                                                                                                                                                                                                                                                                                                                                                                                                                                                                                                                                                                                                                                                                                                | GMERS Government Medical College (GMC), Gotri                                                                                                                          | Gujarat Biotechnology Research Centre                                                                                                                                                                                                                                                                                                                                                                                                                                                                                                                                                                                                                                                                                   | Bithika Duttaroy; Chaitanya Joshi; Dinesh Kumar; Janvi Raval; Madhvi Joshi; Nitesh Shah; Nitin Savaliya; Ramesh Pandit; Sonal Sharma; Twinkle Soni; Umang Mishra; Zarna Patel; Zuber Saiyed                                                                                                                                                                                                                                                                                                                                                                      |
| EPI_ISL_2001183, EPI_ISL_2001185, EPI_ISL_2001186, EPI_ISL_2017757, EPI_ISL_2017758, EPI_ISL_2391489, EPI_ISL_2391490, EPI_ISL_2391491, EPI_ISL_2391492, EPI_ISL_2391493, EPI_ISL_2391494, EPI_ISL_2391495, EPI_ISL_2391496, EPI_ISL_2391497, EPI_ISL_2391498, EPI_ISL_2391501, EPI_ISL_2391502, EPI_ISL_2391503<br>see above                                                                                                                                                                                                                                                                                                                                                                                                                                                                                              | GMERS, Government Medical College (GMC), Gotri<br>GMERS, Government Medical College, Gandhinagar                                                                       | Gujarat Biotechnology Research Centre<br>Gujarat Biotechnology Research Centre                                                                                                                                                                                                                                                                                                                                                                                                                                                                                                                                                                                                                                          | Bithika Duttaroy; Chaitanya Joshi; Dinesh Kumar; Janvi Raval; Madhvi Joshi; Nitesh Shah; Nitin Savaliya; Ramesh Pandit; Sonal Sharma; Twinkle Soni; Umang Mishra; Zarna Patel; Zuber Saiyed<br>Chaitanya Joshi; Dinesh Kumar; Gaurishankar Shrimali; Janvi Raval; Madhvi Joshi; Nitesh Shah; Nitin Savaliya; Ramesh Pandit; Sonal Sharma; Twinkle Soni; Umang Mishra; Zarna Patel; Zuber Saiyed                                                                                                                                                                  |
| EPI_ISL_2379353<br>EPI_ISL_1940019<br>EPI_ISL_1940072,<br>EPI_ISL_1940074,<br>EPI_ISL_1940075                                                                                                                                                                                                                                                                                                                                                                                                                                                                                                                                                                                                                                                                                                                              | GOVIDRAJ NAGAR<br>GOVIMDRAJ NAGAR<br>GOVINDRAJ NAGAR                                                                                                                   | INSACOG-KA, NIMHANS<br>inStem NCBS - INSACOG<br>inStem NCBS - INSACOG                                                                                                                                                                                                                                                                                                                                                                                                                                                                                                                                                                                                                                                   | Ananthapadmanabha Kotambail; Anita S Desai; Anson Kunjumon George; Chetan G K; Chitra Pattabiraman; Darshan Sreenivas; Gautham Arunachal Udupi; Pramada Prasad; V Ravi<br>Uma Ramakrishnan Dasaradhi Palakodeti Aswin SaiNarain<br>Uma Ramakrishnan Dasaradhi Palakodeti Aswin SaiNarain                                                                                                                                                                                                                                                                         |
| EPI_ISL_1940049,<br>EPI_ISL_1940111                                                                                                                                                                                                                                                                                                                                                                                                                                                                                                                                                                                                                                                                                                                                                                                        | GOVINDRAJNAGAR                                                                                                                                                         | inStem NCBS - INSACOG                                                                                                                                                                                                                                                                                                                                                                                                                                                                                                                                                                                                                                                                                                   | Uma Ramakrishnan Dasaradhi Palakodeti Aswin SaiNarain                                                                                                                                                                                                                                                                                                                                                                                                                                                                                                            |
| EPI_ISL_2029122                                                                                                                                                                                                                                                                                                                                                                                                                                                                                                                                                                                                                                                                                                                                                                                                            | General Hospital "Abdulah Nakas"                                                                                                                                       | Alea Genetic Centre                                                                                                                                                                                                                                                                                                                                                                                                                                                                                                                                                                                                                                                                                                     | Adis Kandix; Dino Pecar; Enis Kandic; Lana Salihefendic; Rijad Konjhozdic                                                                                                                                                                                                                                                                                                                                                                                                                                                                                        |
| EPI_ISL_746478, EPI_ISL_746512, EPI_ISL_746571, EPI_ISL_746650, EPI_ISL_746767, EPI_ISL_746808, EPI_ISL_1167704, EPI_ISL_1167741, EPI_ISL_1167796, EPI_ISL_1167812, EPI_ISL_1167852, EPI_ISL_1167886, EPI_ISL_1300514, EPI_ISL_1300516, EPI_ISL_1321450, EPI_ISL_1321504, EPI_ISL_1321515, EPI_ISL_1321520, EPI_ISL_1321523, EPI_ISL_1321528, EPI_ISL_1321589, EPI_ISL_1470422, EPI_ISL_1470435, EPI_ISL_1470440, EPI_ISL_1470452, EPI_ISL_1470550, EPI_ISL_1470554, EPI_ISL_1534583, EPI_ISL_1534591, EPI_ISL_1541005, EPI_ISL_1633496, EPI_ISL_1712335, EPI_ISL_2009200, EPI_ISL_2009256, EPI_ISL_2009258, EPI_ISL_2009577, EPI_ISL_2009655, EPI_ISL_2391055, EPI_ISL_2391219, EPI_ISL_2391318, EPI_ISL_2391473, EPI_ISL_2508582, EPI_ISL_2508589, EPI_ISL_2543503,<br>EPI_ISL_2543535, EPI_ISL_2543590, EPI_ISL_2557257 | Genetica Molecular and Subdepartamento de Virologia ISP Chile<br>Genome Analysis Center, Yamanashi Central Hospital<br>Genome Center<br>Genome Center<br>Genome Centre | Yosuke Hirotsu<br>A. S. M. Rubayet Ul Alam; Ali Ahsan Setu; Hassan M. Al-Emran; Iqbal Kabir Jahid; M. Anwar Hossain; M. Shamunur Rahman; M. Tanvir Islam; Md. Shazid Hasan; Ovinu Kibria Islam; Prosanto Kumar Das; Shovon Lal Sarkar; Tanay Chakrabarty<br>A. S. M. Rubayet Ul Alam; Ali Ahsan Setu; Hassan M. Al-Emran; Iqbal Kabir Jahid; M. Anwar Hossain; M. Shamunur Rahman; M. Tanvir Islam; Md. Shazid Hasan; Ovinu Kibria Islam; Shovon Lal Sarkar; Tanay Chakrabarty<br>Abu Sayeed Mohammad Mahmud; Barna Goswami; Eshwar Osman; Iffat Jahan; Md. Ahasan Habib; Md. Murshed Hasan Sarkar; Md. Saddam Hossain; Md. Salim Khan; Mohammad Mohi Uddin; Mohammad Samir Uzzaman; Shahina Akter; Tanjina Akhter Banu |                                                                                                                                                                                                                                                                                                                                                                                                                                                                                                                                                                  |
| EPI_ISL_2566467,<br>EPI_ISL_2566472,<br>EPI_ISL_2566477,<br>EPI_ISL_2566500,<br>EPI_ISL_2566516                                                                                                                                                                                                                                                                                                                                                                                                                                                                                                                                                                                                                                                                                                                            | Genomics Program, Children Cancer Hospital                                                                                                                             | Genomics Program, Children Cancer Hospital                                                                                                                                                                                                                                                                                                                                                                                                                                                                                                                                                                                                                                                                              | Abdelaziz, H.; Abdo, I.; Abouelnaga, S.; Almeldin, A.; Amer, K.; Diab, A.; El-Shaqqnery, H.; El-Zayat, M.; ElHaddad, A.; ElHalafawy, A.; Elnaqeeb, M.; Farawela, H.; Hammad, M.; Hassan, R.; Hassan, W.; Hatem, A.; Hossam, M.; Hussein, S.; Ismail, J.; Jalal, D.; Mansour, T.; Saaid, M.; Said, D.; Salah, H.; Samir, O.; Sayed, A.; Shalaby, L.; Soliman, S.; Yahia, A.                                                                                                                                                                                       |
| EPI_ISL_2626595,<br>EPI_ISL_2626598                                                                                                                                                                                                                                                                                                                                                                                                                                                                                                                                                                                                                                                                                                                                                                                        | Genomik Solidaritas Indonesia Laboratorium                                                                                                                             | Genomik Solidaritas Indonesia Laboratorium                                                                                                                                                                                                                                                                                                                                                                                                                                                                                                                                                                                                                                                                              | Ahmad Zoebad Foeady; Alfin Mohammad Abdillah; Annisa Muthiah Sukirman; Anuraj Shankar; Ariel Pradipta; Carissa Sintca Wijaya; Dhahlia Agustina Cahyono; Gracia Felias Enos Korompis; Meutia Ayuputeri Kumaheri; Normastuti Adhini Tantyo; Vania Gavriila Wikasa                                                                                                                                                                                                                                                                                                  |
| EPI_ISL_2349172,<br>EPI_ISL_2376808                                                                                                                                                                                                                                                                                                                                                                                                                                                                                                                                                                                                                                                                                                                                                                                        | Greek Genome Center, Biomedical Research Foundation of the Academy of Athens (BRFAA)                                                                                   | Greek Genome Center, Biomedical Research Foundation of the Academy of Athens (BRFAA)                                                                                                                                                                                                                                                                                                                                                                                                                                                                                                                                                                                                                                    | Dimitrios Thanos; Emmanouil Athanasiadis; Giannis Vatsellas; Katerina Zoi; Theodoros Loupis                                                                                                                                                                                                                                                                                                                                                                                                                                                                      |
| EPI_ISL_2301958, EPI_ISL_2343846, EPI_ISL_2364992, EPI_ISL_2368552, EPI_ISL_2368818, EPI_ISL_2370147, EPI_ISL_2370893, EPI_ISL_2371187, EPI_ISL_2371400, EPI_ISL_2371406<br>see above                                                                                                                                                                                                                                                                                                                                                                                                                                                                                                                                                                                                                                      | Greek Genome Center, Biomedical Research Foundation of the Academy of Athens (BRFAA)                                                                                   | Greek Genome Center, Biomedical Research Foundation of the Academy of Athens (BRFAA)                                                                                                                                                                                                                                                                                                                                                                                                                                                                                                                                                                                                                                    | Dimitrios Thanos; Emmanouil Athanasiadis; Giannis Vatsellas; Katerina Zoi; Theodoros Loupis                                                                                                                                                                                                                                                                                                                                                                                                                                                                      |
| EPI_ISL_2339831,<br>EPI_ISL_2603169                                                                                                                                                                                                                                                                                                                                                                                                                                                                                                                                                                                                                                                                                                                                                                                        | Grupo de Investigación en Enfermedades Tropicales del Ejército (GINETEJ), Laboratorio de Referencia e Investigación, Dirección de Sanidad Ejército, Bogotá, Colombia   | Centro de Investigaciones en Microbiología y Biotecnología-UR (CIMBIUR), Facultad de Ciencias Naturales, Universidad del Rosario, Bogotá, Colombia                                                                                                                                                                                                                                                                                                                                                                                                                                                                                                                                                                      | Camilo A. Correa-Cárdenas; Carolina Oliveros; Claudia Méndez; Elizabeth K. Márquez; Frank de los Santos Ortiz; Juan David Ramírez; Julie Pérez; Lorena Albarracín; Luz H. Patiño; María Clara Duque; Marina Muñoz; María Teresa Alvarado; Nathalia Ballesteros; Sergio Castañeda; Sergio Gutierrez-Riveros; Yanira Romero; Zulma Cucunubá                                                                                                                                                                                                                        |
| EPI_ISL_1273073                                                                                                                                                                                                                                                                                                                                                                                                                                                                                                                                                                                                                                                                                                                                                                                                            | Guam Public Health Laboratory                                                                                                                                          | Centers for Disease Control and Prevention Division of Viral Diseases, Pathogen Discovery                                                                                                                                                                                                                                                                                                                                                                                                                                                                                                                                                                                                                               | Anna Montmayeur; Anna Uehara; Ben L. Rambo-Martin; Clinton R. Paden; Dhvani Batra; Haibin Wang; Jasmine Padilla; Jing Zhang; Justin Lee; Katie Dillon; Krista Queen; Kristen Knipe; Kristine Lacey; Lori Rowe; Mark Burroughs; Matthew Schmerer; Mili Sheth; Peter W. Cook; Rachel Marine; Sam Shepard; Sarah Nobles; Shoshona Le; Suxiang Tong; Yan Li; Ying Tao                                                                                                                                                                                                |
| EPI_ISL_2017789<br>EPI_ISL_2029113,<br>EPI_ISL_2029114                                                                                                                                                                                                                                                                                                                                                                                                                                                                                                                                                                                                                                                                                                                                                                     | Gujarat Biotechnology Research Centre<br>HEGP - Laboratoire de Virologie                                                                                               | Gujarat Biotechnology Research Centre<br>HEGP - Laboratoire de Virologie                                                                                                                                                                                                                                                                                                                                                                                                                                                                                                                                                                                                                                                | Chaitanya Joshi; Dinesh Kumar; Janvi Raval; Madhvi Joshi; Nitesh Shah; Nitin Savaliya; Ramesh Pandit; Sonal Sharma; Twinkle Soni; Umang Mishra; Zarna Patel; Zuber Saiyed<br>David Veyer; Hélène Péré; Julien Puech; Maxime Wack; Nicolas Robillard; Sandrine Imbeaud                                                                                                                                                                                                                                                                                            |
| EPI_ISL_733077,<br>EPI_ISL_733078,<br>EPI_ISL_734352                                                                                                                                                                                                                                                                                                                                                                                                                                                                                                                                                                                                                                                                                                                                                                       | HELIX LLC                                                                                                                                                              | WHO National Influenza Centre Russian Federation                                                                                                                                                                                                                                                                                                                                                                                                                                                                                                                                                                                                                                                                        | Andrey Komissarov; Anna Ivanova; Artem Fadeev; Daria Danilenko; Dmitry Bazhenov; Dmitry Lioznov; Elena Nabieva; Georgii Bazkyin; Ksenia Safina; Kseniya Komissarova                                                                                                                                                                                                                                                                                                                                                                                              |
| EPI_ISL_2017306, EPI_ISL_2017375, EPI_ISL_2617596, EPI_ISL_2617599, EPI_ISL_2617601, EPI_ISL_2617602, EPI_ISL_2617617, EPI_ISL_2617619, EPI_ISL_2617621<br>see above                                                                                                                                                                                                                                                                                                                                                                                                                                                                                                                                                                                                                                                       | HLAGYN - Laboratorio de Imunologia de Transplantes de Goias                                                                                                            | HLAGYN - Laboratorio de Imunologia de Transplantes de Goias                                                                                                                                                                                                                                                                                                                                                                                                                                                                                                                                                                                                                                                             | Alessandro Leonardo Alvares Magalhaes; Daniel Ferreira de Sousa; Danielle de Paiva Rezende; Erika Lopes Rocha Batista; Fernando Antonio Vinhal dos Santos; Frederico Rodrigues Vinhal; Lucas Carlos Gomes Pereira; Paola Cristina Resende Silva; Raphael Bessa Parmigiane; Sabrina Sara Moreira Duarte                                                                                                                                                                                                                                                           |
| EPI_ISL_2731451,<br>EPI_ISL_2731452                                                                                                                                                                                                                                                                                                                                                                                                                                                                                                                                                                                                                                                                                                                                                                                        | HLAGYN-Laboratório de Imunologia de Transplantes de Goiás                                                                                                              | Laboratory of Respiratory Viruses and Measles, Oswaldo Cruz Institute, FIOCRUZ                                                                                                                                                                                                                                                                                                                                                                                                                                                                                                                                                                                                                                          | Alice Sampaio Rocha; Ana Carolina Mendonca; Anna Carolina Paixao; Elisa Cavalcante Pereira; Fernando Motta; Luciana Appolinario; Marilda Siqueira on behalf of the Fiocruz COVID-19 Genomic Surveillance Network; Paola Resende; Renata Serrano Lopes; Taina Venas                                                                                                                                                                                                                                                                                               |
| EPI_ISL_2611671<br>EPI_ISL_1904989,<br>EPI_ISL_1904992,<br>EPI_ISL_1904994,<br>EPI_ISL_1904998,<br>EPI_ISL_2142418                                                                                                                                                                                                                                                                                                                                                                                                                                                                                                                                                                                                                                                                                                         | HOME QUARANTINE TASKFORCE<br>HOPITAL SAINT ANDRE                                                                                                                       | Hong Kong Department of Health<br>CNR Virus des Infections Respiratoires - France SUD                                                                                                                                                                                                                                                                                                                                                                                                                                                                                                                                                                                                                                   | Alan K.L. Tsang; Dominic N.C. Tsang; Edman T.K. Lam; Ken H.L. Ng; Peter C.W. Yip; Rickjason C.W. Chan<br>Antonin Bal; Bruno Lina; Gregory Destras; Gwendolynne Burfin; Hadrien Regue; Laurence Josset; Martine Valette; Quentin Semanas                                                                                                                                                                                                                                                                                                                          |
| EPI_ISL_2379349,<br>EPI_ISL_2379350                                                                                                                                                                                                                                                                                                                                                                                                                                                                                                                                                                                                                                                                                                                                                                                        | HOSA HALLI                                                                                                                                                             | INSACOG-KA, NIMHANS                                                                                                                                                                                                                                                                                                                                                                                                                                                                                                                                                                                                                                                                                                     | Ananthapadmanabha Kotambail; Anita S Desai; Anson Kunjumon George; Chetan G K; Chitra Pattabiraman; Darshan Sreenivas; Gautham Arunachal Udupi; Pramada Prasad; V Ravi                                                                                                                                                                                                                                                                                                                                                                                           |
| EPI_ISL_1940001, EPI_ISL_1940002, EPI_ISL_1940003, EPI_ISL_1940004, EPI_ISL_1940008, EPI_ISL_1940011, EPI_ISL_1940013, EPI_ISL_1940014, EPI_ISL_1940015, EPI_ISL_1940062, EPI_ISL_1940064, EPI_ISL_1940067, EPI_ISL_1940068, EPI_ISL_1940112, EPI_ISL_1940113, EPI_ISL_1940114, EPI_ISL_1940118, EPI_ISL_1940119, EPI_ISL_1940123, EPI_ISL_1940125, EPI_ISL_1940127, EPI_ISL_1940128<br>see above                                                                                                                                                                                                                                                                                                                                                                                                                          | HOSAHALLI                                                                                                                                                              | inStem NCBS - INSACOG                                                                                                                                                                                                                                                                                                                                                                                                                                                                                                                                                                                                                                                                                                   | Uma Ramakrishnan Dasaradhi Palakodeti Aswin SaiNarain                                                                                                                                                                                                                                                                                                                                                                                                                                                                                                            |
| EPI_ISL_1379434,<br>EPI_ISL_1712400                                                                                                                                                                                                                                                                                                                                                                                                                                                                                                                                                                                                                                                                                                                                                                                        | HOSPITAL CIUDAD NEILY                                                                                                                                                  | Inciensa, Instituto Costarricense de Investigación y Enseñanza en Nutrición y Salud                                                                                                                                                                                                                                                                                                                                                                                                                                                                                                                                                                                                                                     | Adriana Godínez; Claudio Soto-Garita; Estela Cordero; Francisco Duarte; Hebleen Porras; Joselyn Prado & Raúl Zeledón-Mayorga; José Luis Vargas; Mariela Gutiérrez; Melany Calderón; Melany Calderón & Mariel López                                                                                                                                                                                                                                                                                                                                               |
| EPI_ISL_914816                                                                                                                                                                                                                                                                                                                                                                                                                                                                                                                                                                                                                                                                                                                                                                                                             | HOSPITAL DE NIÑOS DR. CARLOS SAENZ HERRERA                                                                                                                             | Inciensa, Instituto Costarricense de Investigación y Enseñanza en Nutrición y Salud                                                                                                                                                                                                                                                                                                                                                                                                                                                                                                                                                                                                                                     | Adriana Godínez; Claudio Soto-Garita; Estela Cordero; Francisco Duarte; Hebleen Porras; Melany Calderón & Cristian Pérez-Corrales                                                                                                                                                                                                                                                                                                                                                                                                                                |
| EPI_ISL_1494944                                                                                                                                                                                                                                                                                                                                                                                                                                                                                                                                                                                                                                                                                                                                                                                                            | HOSPITAL DEPARTAMENTAL SAN VICENTE DE PAUL                                                                                                                             | Instituto Nacional de Salud- Dirección de Investigación en Salud Pública                                                                                                                                                                                                                                                                                                                                                                                                                                                                                                                                                                                                                                                | Carlos Franco-Muñoz; Carmen Osorio; Diana Malo; Diego A. Álvarez-Díaz; Diego Andrés Prada; Gerardo Santamaría; Hector Alejandro Ruiz-Moreno; Jhonnatan Reales-González; Juan Camilo Martínez; Julian Naizaque; Katherine Laiton-Donato; Lisseth Pardo; Magdalena Wiesner; Marcela Mercado-Reyes; María T. Herrera-Sepúlveda; Marta Lopez Blanco; Martha Lucia Ospina Martínez; Paola Rojas; Sergio Gomez; Sheryll Corchuelo; Ángela Alarcon Cruz                                                                                                                 |
| EPI_ISL_2493332                                                                                                                                                                                                                                                                                                                                                                                                                                                                                                                                                                                                                                                                                                                                                                                                            | HOSPITAL DO RIM E HIPERTENSAO                                                                                                                                          | Instituto Butantan                                                                                                                                                                                                                                                                                                                                                                                                                                                                                                                                                                                                                                                                                                      | Antonio Jorge Martins; Claudia Renata dos Santos Barros; David Schlesinger; Debora Botequiu Moretti; Dimas Tadeu Covas; Elaine Cristina Marquize; Elaine Vieira Santos; Evandra Strazza Rodrigues; Heidge Fukumasa; Jayme Augusto de Souza-Neto; José Salvatore Leister Patané; Luiz Alcantara; Luiz Lehmann Coutinho; Maria Carolina Elias; Maurício Lacerda Nogueira; Rafael dos Santos Bezerra; Raul Machado Neto; Rejane Maria Tommasini Grotto; Ricardo Haddad; Sandra Coccuzzo Sampaio Vesson; Simone Kashima; Svetoslav Nanev Slavov; Vincent Louis Viala |
| EPI_ISL_1712403,<br>EPI_ISL_1712405,<br>EPI_ISL_2272982                                                                                                                                                                                                                                                                                                                                                                                                                                                                                                                                                                                                                                                                                                                                                                    | HOSPITAL DR. ENRIQUE BALTODANO BRICEÑO                                                                                                                                 | Inciensa, Instituto Costarricense de Investigación y Enseñanza en Nutrición y Salud                                                                                                                                                                                                                                                                                                                                                                                                                                                                                                                                                                                                                                     | Adriana Godínez; Claudio Soto-Garita; Estela Cordero; Francisco Duarte; Hebleen Porras; Joselyn Prado & Adriana Bermúdez Espinoza; Joselyn Prado & Adriana Bermúdez-Espinoza; José Luis Vargas; Mariela Gutiérrez; Melany Calderón                                                                                                                                                                                                                                                                                                                               |
| EPI_ISL_2502738                                                                                                                                                                                                                                                                                                                                                                                                                                                                                                                                                                                                                                                                                                                                                                                                            | HOSPITAL DR. MAX TERAN VALLS                                                                                                                                           | Inciensa, Instituto Costarricense de Investigación y Enseñanza en Nutrición y Salud                                                                                                                                                                                                                                                                                                                                                                                                                                                                                                                                                                                                                                     | Adriana Godínez; Claudio Soto-Garita; Estela Cordero; Francisco Duarte; Hebleen Porras; Jose Luis Vargas; Joselyn Prado & María Jose Gómez-Umaña; Mariela Gutierrez; Melany Calderón                                                                                                                                                                                                                                                                                                                                                                             |
| EPI_ISL_2103391                                                                                                                                                                                                                                                                                                                                                                                                                                                                                                                                                                                                                                                                                                                                                                                                            | HOSPITAL DR. MAX TERAN VALLS                                                                                                                                           | Inciensa, Instituto Costarricense de Investigación y Enseñanza en                                                                                                                                                                                                                                                                                                                                                                                                                                                                                                                                                                                                                                                       | Adriana Godínez; Caterina Guzmán; Claudio Soto-Garita; Estela Cordero; Francisco Duarte; Hebleen Porras; Joselyn Prado; José Luis Vargas; Mariela Gutiérrez; Melany Calderón; Nazareth Ruiz & María José Gómez-Umaña                                                                                                                                                                                                                                                                                                                                             |



|                                                                                                                                                                                                                                                                                                                                                                                                                                                                                                                                                                                                                                                                                                                                                                                                                                                                                                                                                                                                                                                                                                                                                                                                                                                                                                                                                                                                                                                                                                                                       |                                                                            |                                                                                                                                                                                                                                                                                                                                                                                                                                                               |                                                                                                                                                                                                                                                                                                                                                                                                         |
|---------------------------------------------------------------------------------------------------------------------------------------------------------------------------------------------------------------------------------------------------------------------------------------------------------------------------------------------------------------------------------------------------------------------------------------------------------------------------------------------------------------------------------------------------------------------------------------------------------------------------------------------------------------------------------------------------------------------------------------------------------------------------------------------------------------------------------------------------------------------------------------------------------------------------------------------------------------------------------------------------------------------------------------------------------------------------------------------------------------------------------------------------------------------------------------------------------------------------------------------------------------------------------------------------------------------------------------------------------------------------------------------------------------------------------------------------------------------------------------------------------------------------------------|----------------------------------------------------------------------------|---------------------------------------------------------------------------------------------------------------------------------------------------------------------------------------------------------------------------------------------------------------------------------------------------------------------------------------------------------------------------------------------------------------------------------------------------------------|---------------------------------------------------------------------------------------------------------------------------------------------------------------------------------------------------------------------------------------------------------------------------------------------------------------------------------------------------------------------------------------------------------|
| EPI_ISL_2272990                                                                                                                                                                                                                                                                                                                                                                                                                                                                                                                                                                                                                                                                                                                                                                                                                                                                                                                                                                                                                                                                                                                                                                                                                                                                                                                                                                                                                                                                                                                       | HOSPITAL DR. RAFAEL A. CALDERON GUARDIA                                    | Incienza, Instituto Costarricense de Investigación y Enseñanza en Nutrición y Salud                                                                                                                                                                                                                                                                                                                                                                           | Adriana Godínez; Claudio Soto-Garita; Estela Cordero; Francisco Duarte; Hebleen Porras; Joselyn Prado & Fabian Salas-Flores; José Luis Vargas; Mariela Gutiérrez; Melany Calderón                                                                                                                                                                                                                       |
| EPI_ISL_1827529                                                                                                                                                                                                                                                                                                                                                                                                                                                                                                                                                                                                                                                                                                                                                                                                                                                                                                                                                                                                                                                                                                                                                                                                                                                                                                                                                                                                                                                                                                                       | HOSPITAL DR. WILLIAM ALLEN                                                 | Incienza, Instituto Costarricense de Investigación y Enseñanza en Nutrición y Salud                                                                                                                                                                                                                                                                                                                                                                           | Adriana Godínez; Claudio Soto-Garita; Estela Cordero; Francisco Duarte; Hebleen Porras; Joselyn Prado & Mónica Charpentier-Artavia; José Luis Vargas; Mariela Gutiérrez; Melany Calderón                                                                                                                                                                                                                |
| EPI_ISL_445345                                                                                                                                                                                                                                                                                                                                                                                                                                                                                                                                                                                                                                                                                                                                                                                                                                                                                                                                                                                                                                                                                                                                                                                                                                                                                                                                                                                                                                                                                                                        | HOSPITAL DR.HERNAN HENRIQUEZ ARAVENA                                       | Instituto de Salud Publica de Chile                                                                                                                                                                                                                                                                                                                                                                                                                           | Alejandra Acevedo; Andrés E Castillo; Bárbara Parra; Carolina Tambley; Gabriel Leal; Jaime Lagos; Jorge Fernandez; Loredana Arata; Patricia Bustos; Paz Tapia; Rodrigo Fasce; Winston Andrade                                                                                                                                                                                                           |
| EPI_ISL_2103411                                                                                                                                                                                                                                                                                                                                                                                                                                                                                                                                                                                                                                                                                                                                                                                                                                                                                                                                                                                                                                                                                                                                                                                                                                                                                                                                                                                                                                                                                                                       | HOSPITAL GOLFITO MANUEL MORA VALVERDE                                      | Incienza, Instituto Costarricense de Investigación y Enseñanza en Nutrición y Salud                                                                                                                                                                                                                                                                                                                                                                           | Adriana Godínez; Caterina Guzmán; Claudio Soto-Garita; Estela Cordero; Francisco Duarte; Hebleen Porras; Joselyn Prado; José Luis Vargas; Mariela Gutiérrez; Melany Calderón; Nazareth Ruiz & Lizzeth Blanco                                                                                                                                                                                            |
| EPI_ISL_2502729                                                                                                                                                                                                                                                                                                                                                                                                                                                                                                                                                                                                                                                                                                                                                                                                                                                                                                                                                                                                                                                                                                                                                                                                                                                                                                                                                                                                                                                                                                                       | HOSPITAL LA ANEXION                                                        | Incienza, Instituto Costarricense de Investigación y Enseñanza en Nutrición y Salud                                                                                                                                                                                                                                                                                                                                                                           | Adriana Godínez; Claudio Soto-Garita; Estela Cordero; Francisco Duarte; Hebleen Porras; Jose Luis Vargas; Joselyn Prado & Ivanna Krize-Morún; Mariela Gutierrez; Melany CalderOn                                                                                                                                                                                                                        |
| EPI_ISL_1712382                                                                                                                                                                                                                                                                                                                                                                                                                                                                                                                                                                                                                                                                                                                                                                                                                                                                                                                                                                                                                                                                                                                                                                                                                                                                                                                                                                                                                                                                                                                       | HOSPITAL MEXICO                                                            | Incienza, Instituto Costarricense de Investigación y Enseñanza en Nutrición y Salud                                                                                                                                                                                                                                                                                                                                                                           | Adriana Godínez; Claudio Soto-Garita; Estela Cordero; Francisco Duarte; Hebleen Porras; Joselyn Prado & Teresita Somogyi; José Luis Vargas; Mariela Gutiérrez; Melany Calderón                                                                                                                                                                                                                          |
| EPI_ISL_1827516, EPI_ISL_2272961, EPI_ISL_2272964                                                                                                                                                                                                                                                                                                                                                                                                                                                                                                                                                                                                                                                                                                                                                                                                                                                                                                                                                                                                                                                                                                                                                                                                                                                                                                                                                                                                                                                                                     | HOSPITAL MONSEÑOR SANABRIA                                                 | Incienza, Instituto Costarricense de Investigación y Enseñanza en Nutrición y Salud                                                                                                                                                                                                                                                                                                                                                                           | Adriana Godínez; Claudio Soto-Garita; Estela Cordero; Francisco Duarte; Hebleen Porras; Joselyn Prado & Andrea Moreno-Carvajal; Joselyn Prado & María José Gómez-Umaña; José Luis Vargas; Mariela Gutiérrez; Melany Calderón                                                                                                                                                                            |
| EPI_ISL_2502741                                                                                                                                                                                                                                                                                                                                                                                                                                                                                                                                                                                                                                                                                                                                                                                                                                                                                                                                                                                                                                                                                                                                                                                                                                                                                                                                                                                                                                                                                                                       | HOSPITAL SAN FRANCISCO DE ASIS                                             | Incienza, Instituto Costarricense de Investigación y Enseñanza en Nutrición y Salud                                                                                                                                                                                                                                                                                                                                                                           | Adriana Godínez; Claudio Soto-Garita; Estela Cordero; Francisco Duarte; Hebleen Porras; Jose Luis Vargas; Joselyn Prado & Adrián Fallas-Mora; Mariela Gutierrez; Melany CalderOn                                                                                                                                                                                                                        |
| EPI_ISL_2502762                                                                                                                                                                                                                                                                                                                                                                                                                                                                                                                                                                                                                                                                                                                                                                                                                                                                                                                                                                                                                                                                                                                                                                                                                                                                                                                                                                                                                                                                                                                       | HOSPITAL SAN JUAN DE DIOS                                                  | Incienza, Instituto Costarricense de Investigación y Enseñanza en Nutrición y Salud                                                                                                                                                                                                                                                                                                                                                                           | Adriana Godínez; Claudio Soto-Garita; Estela Cordero; Francisco Duarte; Hebleen Porras; Jose Luis Vargas; Joselyn Prado & Marco Chaves-Otárola; Mariela Gutierrez; Melany CalderOn                                                                                                                                                                                                                      |
| EPI_ISL_2103373                                                                                                                                                                                                                                                                                                                                                                                                                                                                                                                                                                                                                                                                                                                                                                                                                                                                                                                                                                                                                                                                                                                                                                                                                                                                                                                                                                                                                                                                                                                       | HOSPITAL SAN JUAN DE DIOS                                                  | Incienza, Instituto Costarricense de Investigación y Enseñanza en Nutrición y Salud                                                                                                                                                                                                                                                                                                                                                                           | Adriana Godínez & Melany Calderon; Claudio Soto-Garita; Estela Cordero; Francisco Duarte; Hebleen Brenes                                                                                                                                                                                                                                                                                                |
| EPI_ISL_1469578                                                                                                                                                                                                                                                                                                                                                                                                                                                                                                                                                                                                                                                                                                                                                                                                                                                                                                                                                                                                                                                                                                                                                                                                                                                                                                                                                                                                                                                                                                                       | HOSPITAL SAO FRANCISCO DE ASSIS                                            | Epiclin                                                                                                                                                                                                                                                                                                                                                                                                                                                       | Ana Paula Mutterle; Carolina Comerlato; Eliana Márcia Da Ros Wendland; Fernando Hayashi Sant'Anna; Janira Prichula; Juliana Comerlato                                                                                                                                                                                                                                                                   |
| EPI_ISL_412971                                                                                                                                                                                                                                                                                                                                                                                                                                                                                                                                                                                                                                                                                                                                                                                                                                                                                                                                                                                                                                                                                                                                                                                                                                                                                                                                                                                                                                                                                                                        | HUS Diagnostiikkakeskus, Hailinto                                          | Department of Virology Faculty of Medicine, Medicum University of Helsinki                                                                                                                                                                                                                                                                                                                                                                                    | Hannimari Kallio-Kokko; Olli Vapalahti; Suvi Kuivanen; Teemu Smura                                                                                                                                                                                                                                                                                                                                      |
| EPI_ISL_2096776                                                                                                                                                                                                                                                                                                                                                                                                                                                                                                                                                                                                                                                                                                                                                                                                                                                                                                                                                                                                                                                                                                                                                                                                                                                                                                                                                                                                                                                                                                                       | Hadassah Medical Center Clinical Virology Laboratory, Hadassah Ein Kerem   | Hadassah Hebrew University Viral Sequencing Group, Hadassah Hebrew University Medical Center                                                                                                                                                                                                                                                                                                                                                                  | Dana G. Wolf; Esther Oiknine-Djian; Hadar Golan Berman; Mila Rivkin; Sheera Adar                                                                                                                                                                                                                                                                                                                        |
| EPI_ISL_1831284, EPI_ISL_1831287, EPI_ISL_1831292, EPI_ISL_1831294, EPI_ISL_1831295, EPI_ISL_1831297, EPI_ISL_1831310, EPI_ISL_1831312, EPI_ISL_1831331, EPI_ISL_1831333, EPI_ISL_1831369, EPI_ISL_1831372, EPI_ISL_1831377, EPI_ISL_2005350, EPI_ISL_2005415, EPI_ISL_2005455, EPI_ISL_2005490, EPI_ISL_2005494, EPI_ISL_2005497, EPI_ISL_2005527, EPI_ISL_2005569, EPI_ISL_2005587, EPI_ISL_2006541, EPI_ISL_2006543, EPI_ISL_2006547, EPI_ISL_2006550, EPI_ISL_2006553, EPI_ISL_2006556, EPI_ISL_2006559, EPI_ISL_2006572, EPI_ISL_2006577, EPI_ISL_2006582, EPI_ISL_2006586, EPI_ISL_2006590, EPI_ISL_2006592, EPI_ISL_2006594, EPI_ISL_2006600, EPI_ISL_2006604, EPI_ISL_2006606, EPI_ISL_2006607, EPI_ISL_2006612, EPI_ISL_2006613, EPI_ISL_2006614, EPI_ISL_2006616, EPI_ISL_2006624, EPI_ISL_2006625, EPI_ISL_2006625, EPI_ISL_2006640, EPI_ISL_2006642, EPI_ISL_2006648, EPI_ISL_2006659, EPI_ISL_2006661, EPI_ISL_2022557, EPI_ISL_2022558, EPI_ISL_2022561, EPI_ISL_2022597, EPI_ISL_2022575, EPI_ISL_2080368, EPI_ISL_2080396, EPI_ISL_2080404, EPI_ISL_2080419, EPI_ISL_2080424, EPI_ISL_2080433, EPI_ISL_2080440, EPI_ISL_2080441, EPI_ISL_2080446, EPI_ISL_2080451, EPI_ISL_2080459, EPI_ISL_2080462, EPI_ISL_2080465, EPI_ISL_2080470, EPI_ISL_2253257, EPI_ISL_2348111, EPI_ISL_2447285, EPI_ISL_2468036, EPI_ISL_2469258, EPI_ISL_2512057, EPI_ISL_2512197, EPI_ISL_2512233, EPI_ISL_2513891, EPI_ISL_2552888, EPI_ISL_2553953, EPI_ISL_2638995, EPI_ISL_2641360, EPI_ISL_2682216, EPI_ISL_2682537, EPI_ISL_2766042 | Wellcome Sanger Institute for the COVID-19 Genomics UK (COG-UK) Consortium | Cordelia Langford; David K. Jackson; Dominic Kwiatkowski; Ewan Harrison; Health Services Laboratories and Alex Alderton; Ian Johnston; Jeffrey Barrett; John Sillitoe on behalf of the Wellcome Sanger Institute COVID-19 Surveillance Team; Roberto Amato; Sonia Gonçalves                                                                                                                                                                                   |                                                                                                                                                                                                                                                                                                                                                                                                         |
| EPI_ISL_2322989, EPI_ISL_2376218                                                                                                                                                                                                                                                                                                                                                                                                                                                                                                                                                                                                                                                                                                                                                                                                                                                                                                                                                                                                                                                                                                                                                                                                                                                                                                                                                                                                                                                                                                      | Heilig hart Lier                                                           | Imeda Hospital                                                                                                                                                                                                                                                                                                                                                                                                                                                | Dagmar Obbels; Hanne Valgaeren; Johan Frans                                                                                                                                                                                                                                                                                                                                                             |
| EPI_ISL_2293245                                                                                                                                                                                                                                                                                                                                                                                                                                                                                                                                                                                                                                                                                                                                                                                                                                                                                                                                                                                                                                                                                                                                                                                                                                                                                                                                                                                                                                                                                                                       | Heilig hart Lier                                                           | Imelda Ziekenhuis                                                                                                                                                                                                                                                                                                                                                                                                                                             | Dagmar Obbels; Hanne Valgaeren; Johan Frans                                                                                                                                                                                                                                                                                                                                                             |
| EPI_ISL_2617253                                                                                                                                                                                                                                                                                                                                                                                                                                                                                                                                                                                                                                                                                                                                                                                                                                                                                                                                                                                                                                                                                                                                                                                                                                                                                                                                                                                                                                                                                                                       | Hellenic National Blood Transfusion Center - EKEA                          | Greek Genome Center, Biomedical Research Foundation of the Academy of Athens (BRFAA)                                                                                                                                                                                                                                                                                                                                                                          | Dimitrios Thanos; Efthimia Petinaki; Emmanouil Athanasiadis; Giannis Vatsellas; Katerina Zoi; Kostas Stamoulis; Theodoros Loupis                                                                                                                                                                                                                                                                        |
| EPI_ISL_2530115, EPI_ISL_2530117, EPI_ISL_2530119, EPI_ISL_2530132, EPI_ISL_2530134, EPI_ISL_2530143, EPI_ISL_2530148, EPI_ISL_2530160, EPI_ISL_2530161, EPI_ISL_2530163, EPI_ISL_2530169, EPI_ISL_2530174, EPI_ISL_2530179, EPI_ISL_2530185, EPI_ISL_2530191, EPI_ISL_2530193, EPI_ISL_2530195, EPI_ISL_2530196, EPI_ISL_2530198, EPI_ISL_2530199, EPI_ISL_2530201, EPI_ISL_2530202, EPI_ISL_2530204, EPI_ISL_2530206, EPI_ISL_2530207, EPI_ISL_2530209, EPI_ISL_2530210, EPI_ISL_2530212, EPI_ISL_2530214, EPI_ISL_2530217, EPI_ISL_2530219, EPI_ISL_2530221, EPI_ISL_2530222, EPI_ISL_2530224, EPI_ISL_2530226, EPI_ISL_2530227, EPI_ISL_2530229, EPI_ISL_2530230, EPI_ISL_2530232, EPI_ISL_2530233, EPI_ISL_2530235, EPI_ISL_2530236, EPI_ISL_2530239, EPI_ISL_2530241, EPI_ISL_2530243, EPI_ISL_2530245, EPI_ISL_2530246, EPI_ISL_2530248, EPI_ISL_2530265, EPI_ISL_2530269, EPI_ISL_2530304, EPI_ISL_2530308, EPI_ISL_2530319, EPI_ISL_2530373, EPI_ISL_2530374, EPI_ISL_2530378, EPI_ISL_2530379, EPI_ISL_2600958                                                                                                                                                                                                                                                                                                                                                                                                                                                                                                              | Hematopathology Laboratory, ACTREC, TMC                                    | ACTREC; Hematopathology Laboratory                                                                                                                                                                                                                                                                                                                                                                                                                            |                                                                                                                                                                                                                                                                                                                                                                                                         |
| EPI_ISL_1168193, EPI_ISL_1259296                                                                                                                                                                                                                                                                                                                                                                                                                                                                                                                                                                                                                                                                                                                                                                                                                                                                                                                                                                                                                                                                                                                                                                                                                                                                                                                                                                                                                                                                                                      | Hopital                                                                    | National Reference Center for Viruses of Respiratory Infections, Institut Pasteur, Paris                                                                                                                                                                                                                                                                                                                                                                      | Angela Brisebarre; Camille Capel; Etienne Simon-Lorière; Hermann CèCile; Marion Barbet; Maud Vanpeene; Méline Bizard; Sylvie Behillili; Sylvie van der Werf; Vincent Enouf                                                                                                                                                                                                                              |
| EPI_ISL_1381196, EPI_ISL_2029931, EPI_ISL_2188352, EPI_ISL_2188418, EPI_ISL_2374451, EPI_ISL_2462927                                                                                                                                                                                                                                                                                                                                                                                                                                                                                                                                                                                                                                                                                                                                                                                                                                                                                                                                                                                                                                                                                                                                                                                                                                                                                                                                                                                                                                  | Hospital                                                                   | National Reference Center for Viruses of Respiratory Infections, Institut Pasteur, Paris                                                                                                                                                                                                                                                                                                                                                                      | Amaury Vaysse; Angela Brisebarre; Bressollette CèLine; Camille Capel; Christophe Malabat; Corinne Maurais; Céline Ramanantsoa; Didier Matterna; Emmanuelle Permal; Etienne Simon-Lorière; Frédéric Lemoine; Laura Djamdjian; Louise Lefrançois; Marion Barbet; Maud Vanpeene; Méline Bizard; Nabil Gastli; Raphaël Guhenneuf; Sylvie Behillili; Sylvie Van der Werf; Sylvie van der Werf; Vincent Enouf |
| EPI_ISL_1523274                                                                                                                                                                                                                                                                                                                                                                                                                                                                                                                                                                                                                                                                                                                                                                                                                                                                                                                                                                                                                                                                                                                                                                                                                                                                                                                                                                                                                                                                                                                       | Hospital Center Emile Mayrisch                                             | Laboratoire national de sante, Microbiology, Microbial Genomics Platform                                                                                                                                                                                                                                                                                                                                                                                      | Anke Wienecke-Baldacchino; Catherine Ragimbeau; Cynthia Oxacelay; Fatu Djabi; Jessica Tapp; Lise Pignon; Raoul Salmon; Tamir Abdelrahman                                                                                                                                                                                                                                                                |
| EPI_ISL_1384137, EPI_ISL_1917450                                                                                                                                                                                                                                                                                                                                                                                                                                                                                                                                                                                                                                                                                                                                                                                                                                                                                                                                                                                                                                                                                                                                                                                                                                                                                                                                                                                                                                                                                                      | Hospital Center Luxembourg                                                 | Laboratoire national de sante, Microbiology, Microbial Genomics Platform                                                                                                                                                                                                                                                                                                                                                                                      | Anke Wienecke-Baldacchino; Catherine Ragimbeau; Fatu Djabi; Jean-Hugues Francois; Jessica Tapp; Lise Pignon; Michel Kohnen; Raoul Salmon; Tamir Abdelrahman                                                                                                                                                                                                                                             |
| EPI_ISL_76990                                                                                                                                                                                                                                                                                                                                                                                                                                                                                                                                                                                                                                                                                                                                                                                                                                                                                                                                                                                                                                                                                                                                                                                                                                                                                                                                                                                                                                                                                                                         | Hospital Dr. Rafael A. Calderon Guardia                                    | Incienza, Instituto Costarricense de Investigación y Enseñanza en Nutrición y Salud                                                                                                                                                                                                                                                                                                                                                                           | Adriana Godínez; Claudio Soto-Garita; Estela Cordero; Francisco Duarte; Hebleen Porras; Melany Calderón & Mariel López                                                                                                                                                                                                                                                                                  |
| EPI_ISL_1527015                                                                                                                                                                                                                                                                                                                                                                                                                                                                                                                                                                                                                                                                                                                                                                                                                                                                                                                                                                                                                                                                                                                                                                                                                                                                                                                                                                                                                                                                                                                       | Hospital Guápiles                                                          | Incienza, Instituto Costarricense de Investigación y Enseñanza en Nutrición y Salud                                                                                                                                                                                                                                                                                                                                                                           | Barboza-Arguedas E & Cerdas-Quesada C; Pérez-Correaes C                                                                                                                                                                                                                                                                                                                                                 |
| EPI_ISL_2014355                                                                                                                                                                                                                                                                                                                                                                                                                                                                                                                                                                                                                                                                                                                                                                                                                                                                                                                                                                                                                                                                                                                                                                                                                                                                                                                                                                                                                                                                                                                       | Hospital Herrera Llerandi                                                  | Asociación de Salud Integral/Clinica Familiar Luis Angel García                                                                                                                                                                                                                                                                                                                                                                                               | Ana S. Gonzalez-Reiche; Claudia Rangel; Danicela Mercado; Eduardo Arathoon; Hilda Ruiz; Luis Aguirre; Luis Rivas; Narda Medina; Oscar Bonilla; Osmar Gamboa.                                                                                                                                                                                                                                            |
| EPI_ISL_481247                                                                                                                                                                                                                                                                                                                                                                                                                                                                                                                                                                                                                                                                                                                                                                                                                                                                                                                                                                                                                                                                                                                                                                                                                                                                                                                                                                                                                                                                                                                        | Hospital IESS Babahoyo                                                     | Institute of Microbiology, Universidad San Francisco de Quito                                                                                                                                                                                                                                                                                                                                                                                                 | Belén Prado-Vivar; Bernardo Gutiérrez; Carla Torres; Francisco Cordova; Gabriel Trueba; Juan José Guadalupe; Killen Briones-Claudette; Killen Briones-Zamora; Michelle Grunauer; Monica Becerra-Wong; Ninfa Henriquez; Patricio Rojas-Silva; Paul Cárdenas; Susy Márquez; Verónica Barrañán                                                                                                             |
| EPI_ISL_413016                                                                                                                                                                                                                                                                                                                                                                                                                                                                                                                                                                                                                                                                                                                                                                                                                                                                                                                                                                                                                                                                                                                                                                                                                                                                                                                                                                                                                                                                                                                        | Hospital Israelita Albert Einstein                                         | Instituto Adolfo Lutz, Interdisciplinary Procedures Center, Strategic Laboratory                                                                                                                                                                                                                                                                                                                                                                              | Andrew Rambaut; Claudia Regina Gonçalves; Claudio Tavares Sacchi; Ester Cerdeira Sabino; Fabiana Cristina Pereira dos Santos; Flávia Cristina da Silva Sales; Ingra Morales Claro; Jaqueline Goes de Jesus; Joshua Quick; Maria do Carmo Sampaio Tavares Timenetsky; Nicholas James Loman; Nuno Rodrigues Faria                                                                                         |
| EPI_ISL_527739                                                                                                                                                                                                                                                                                                                                                                                                                                                                                                                                                                                                                                                                                                                                                                                                                                                                                                                                                                                                                                                                                                                                                                                                                                                                                                                                                                                                                                                                                                                        | Hospital Mexico [San Jose/San Jose]                                        | Incienza, Instituto Costarricense de Investigación y Enseñanza en Nutrición y Salud                                                                                                                                                                                                                                                                                                                                                                           | Adriana Godínez & Melany Calderon; Claudio Soto-Garita; Estela Cordero; Francisco Duarte; Hebleen Porras                                                                                                                                                                                                                                                                                                |
| EPI_ISL_414016                                                                                                                                                                                                                                                                                                                                                                                                                                                                                                                                                                                                                                                                                                                                                                                                                                                                                                                                                                                                                                                                                                                                                                                                                                                                                                                                                                                                                                                                                                                        | Hospital São Joaquim Beneficencia Portuguesa                               | Instituto Adolfo Lutz, Interdisciplinary Procedures Center, Strategic Laboratory                                                                                                                                                                                                                                                                                                                                                                              | Audrey Cilli; Carlos Henrique Camargo; Claudia Regina Gonçalves; Claudio Tavares Sacchi; Daniela Bernardes Borges da Silva; Ester Cerdeira Sabino; Maria do Carmo Sampaio Tavares Timenetsky; Terezinha Maria de Paiva                                                                                                                                                                                  |
| EPI_ISL_2233095                                                                                                                                                                                                                                                                                                                                                                                                                                                                                                                                                                                                                                                                                                                                                                                                                                                                                                                                                                                                                                                                                                                                                                                                                                                                                                                                                                                                                                                                                                                       | Hotel Horison                                                              | National Institute of Health Research and Development                                                                                                                                                                                                                                                                                                                                                                                                         | Arie Ardiansyah Nugraha; Hana Apsari Pawestri; Hartanti Dian Ikawati; Kartika Dewi Puspa; Krisna Pangesti; Nelly Puspandari; Subangkit; Triyani Soekarso; Vivi Setiawaty                                                                                                                                                                                                                                |
| EPI_ISL_2466656                                                                                                                                                                                                                                                                                                                                                                                                                                                                                                                                                                                                                                                                                                                                                                                                                                                                                                                                                                                                                                                                                                                                                                                                                                                                                                                                                                                                                                                                                                                       | Human Genetic Research Center, Kawsar Biotech Company                      | Human Genetic Research Center, Kawsar Biotech Company                                                                                                                                                                                                                                                                                                                                                                                                         | Abbasalipour Bashash, M.; Azadmanesh, K.; Chamran Hospital, C.; Khosravi, M.A.; National Institute for Medical Research Development, N.; Zeinali, R.; Zeinali, S.                                                                                                                                                                                                                                       |
| EPI_ISL_2466657                                                                                                                                                                                                                                                                                                                                                                                                                                                                                                                                                                                                                                                                                                                                                                                                                                                                                                                                                                                                                                                                                                                                                                                                                                                                                                                                                                                                                                                                                                                       | Human Genetic Research Center, Kawsar Biotech Company                      | Kawsar Biotech Company                                                                                                                                                                                                                                                                                                                                                                                                                                        | Abbasalipour Bashash, M.; Abbasalipour, M.; Azadmanesh, K.; Chamran Hospital, C.; Dabagh, S.; Keshvar, Y.; Khosravi, M.A.; National Institute for Medical Research Development, N.; Sabeghi, S.; Sharifi, Z.; Shirzad, T.; Zeinali, R.; Zeinali, S.                                                                                                                                                     |
| EPI_ISL_526225, EPI_ISL_1041208                                                                                                                                                                                                                                                                                                                                                                                                                                                                                                                                                                                                                                                                                                                                                                                                                                                                                                                                                                                                                                                                                                                                                                                                                                                                                                                                                                                                                                                                                                       | Hungarian Defence Forces Military Medical Centre                           | National Laboratory of Virology, Szentágotai Research Centre                                                                                                                                                                                                                                                                                                                                                                                                  | Balázs Somogyi; Bálint Eszenyi; Csaba Pereszlényi; Endre Gábor Tóth; Ferenc Jakab; Gábor Kemenesi; Ágnes Balázs-Nagy                                                                                                                                                                                                                                                                                    |
| EPI_ISL_2151871                                                                                                                                                                                                                                                                                                                                                                                                                                                                                                                                                                                                                                                                                                                                                                                                                                                                                                                                                                                                                                                                                                                                                                                                                                                                                                                                                                                                                                                                                                                       | Hôpital Avicenne                                                           | Department of Virology, Henri Mondor University Hospital, Assistance Publique Hôpitaux de Paris, Université Paris-Est Créteil, INSERM U955                                                                                                                                                                                                                                                                                                                    | Alexandre Soulier; Christophe Rodriguez; Elisabeth Trawinski; Guillaume Gricourt; Jean-Michel Pawlotsky; Melissa N'Debi; Slim Fourati; Vanessa Demontant                                                                                                                                                                                                                                                |
| EPI_ISL_2688682                                                                                                                                                                                                                                                                                                                                                                                                                                                                                                                                                                                                                                                                                                                                                                                                                                                                                                                                                                                                                                                                                                                                                                                                                                                                                                                                                                                                                                                                                                                       | Hôpital Jacques Monod                                                      | Centre Hospitalier Universitaire de Rouen Laboratoire de Virologie                                                                                                                                                                                                                                                                                                                                                                                            | Alice Moisan; Fabienne De Oliveira; Marie Leoz                                                                                                                                                                                                                                                                                                                                                          |
| EPI_ISL_2348923, EPI_ISL_2348924, EPI_ISL_2348925                                                                                                                                                                                                                                                                                                                                                                                                                                                                                                                                                                                                                                                                                                                                                                                                                                                                                                                                                                                                                                                                                                                                                                                                                                                                                                                                                                                                                                                                                     | Hôpitaux Iris Sud Etterbeek-Ixelles                                        | UCLouvain/REC/MBLG                                                                                                                                                                                                                                                                                                                                                                                                                                            | Benoit Kabamba Mukadi; Jean Ruelle; Nicolas Pinte; Ophélie Simon                                                                                                                                                                                                                                                                                                                                        |
| EPI_ISL_1477140, EPI_ISL_1477146                                                                                                                                                                                                                                                                                                                                                                                                                                                                                                                                                                                                                                                                                                                                                                                                                                                                                                                                                                                                                                                                                                                                                                                                                                                                                                                                                                                                                                                                                                      | Hôpitaux Robert Schuman                                                    | Laboratoire national de sante, Microbiology, Microbial Genomics Platform                                                                                                                                                                                                                                                                                                                                                                                      | Alain Hakim; Anke Wienecke-Baldacchino; Catherine Ragimbeau; Fatu Djabi; Jessica Tapp; Lise Pignon; Raoul Salmon; Tamir Abdelrahman                                                                                                                                                                                                                                                                     |
| EPI_ISL_2100187, EPI_ISL_2100188, EPI_ISL_2100190, EPI_ISL_2100194, EPI_ISL_2100195, EPI_ISL_2100216, EPI_ISL_2361845, EPI_ISL_2361873                                                                                                                                                                                                                                                                                                                                                                                                                                                                                                                                                                                                                                                                                                                                                                                                                                                                                                                                                                                                                                                                                                                                                                                                                                                                                                                                                                                                | see above                                                                  | ICMR-National Institute for Research In Tuberculosis                                                                                                                                                                                                                                                                                                                                                                                                          | Dr Luke Elizabeth Hanna; Dr Nandhini Palani; Dr Padmapiyadarsini C; Dr Radha Gopalaswamy; Dr S Siva Kumar; Mr Anbazagan Selvaraj; Mr Ramesh K                                                                                                                                                                                                                                                           |
| EPI_ISL_2189572, EPI_ISL_2189596, EPI_ISL_2189638, EPI_ISL_2189639, EPI_ISL_2189641, EPI_ISL_2189642, EPI_ISL_2189643, EPI_ISL_2189644, EPI_ISL_2189646, EPI_ISL_2189661, EPI_ISL_2189697, EPI_ISL_2189698, EPI_ISL_2189699, EPI_ISL_2189704, EPI_ISL_2189708, EPI_ISL_2189710, EPI_ISL_2189711, EPI_ISL_2189712, EPI_ISL_2189713, EPI_ISL_2189716, EPI_ISL_2189717, EPI_ISL_2189724, EPI_ISL_2189726, EPI_ISL_2189728, EPI_ISL_2189744, EPI_ISL_2189748, EPI_ISL_2189749, EPI_ISL_2189755, EPI_ISL_2189761, EPI_ISL_2189765, EPI_ISL_2189766, EPI_ISL_2189768, EPI_ISL_2189770, EPI_ISL_2189773, EPI_ISL_2189778, EPI_ISL_2189780, EPI_ISL_2189786, EPI_ISL_2189787, EPI_ISL_2189792, EPI_ISL_2189829, EPI_ISL_2189830, EPI_ISL_2189831, EPI_ISL_2189834, EPI_ISL_2189840, EPI_ISL_2189841, EPI_ISL_2189843, EPI_ISL_2189845, EPI_ISL_2189846, EPI_ISL_2189850, EPI_ISL_2189852, EPI_ISL_2189857, EPI_ISL_2189859, EPI_ISL_2189860, EPI_ISL_2189863, EPI_ISL_2555672, EPI_ISL_2555696, EPI_ISL_2555701, EPI_ISL_2555714, EPI_ISL_2555716, EPI_ISL_2555720, EPI_ISL_2555732                                                                                                                                                                                                                                                                                                                                                                                                                                                           | NCDI Delhi, Biotechnology Division                                         | A Walimbe; A.Awhale; A.Titkare; B.Aporva; G.Divekar; H.Kengale; Hema Gogia; Hemlata Lali; K.P.Shinde; K.lyengar; K.Korabu; Kalaiarasan Ponnusamy; M L Choudhary; M.Das; Mahesh S Dhar; Manoj K Singh; Meena Datta; Partha Rakshit; Preeti Madan; Priyanka Singh; R.Verma; Radhakrishnan V. S.; Robin Marwal; S.Jadhav; S.Bhorekar; S.Jadhav; S.Sheikande; Sandhya Kabra; Sujeet K Singh; T.Sanjevi; U.Saha; Uma Sharma; V.Malik; V.Autude; V.Vipat; Z. Sayyed |                                                                                                                                                                                                                                                                                                                                                                                                         |
| EPI_ISL_1703662, EPI_ISL_1703668, EPI_ISL_1703740, EPI_ISL_1704378, EPI_ISL_1704234, EPI_ISL_1704561, EPI_ISL_1704605, EPI_ISL_1704617, EPI_ISL_1704618, EPI_ISL_1704620, EPI_ISL_1704625, EPI_ISL_1704626, EPI_ISL_1704627, EPI_ISL_1704632, EPI_ISL_1704634, EPI_ISL_1704635, EPI_ISL_1704636, EPI_ISL_1704637, EPI_ISL_1704638, EPI_ISL_1704639, EPI_ISL_1704642, EPI_ISL_1841240, EPI_ISL_1841241, EPI_ISL_1841242, EPI_ISL_1841243, EPI_ISL_1841245, EPI_ISL_1841246, EPI_ISL_1841247, EPI_ISL_1841248, EPI_ISL_1841249, EPI_ISL_1841250, EPI_ISL_1841251, EPI_ISL_1841252, EPI_ISL_1841253, EPI_ISL_1841254, EPI_ISL_1841255, EPI_ISL_1841256, EPI_ISL_1841257, EPI_ISL_1841258, EPI_ISL_1841259, EPI_ISL_1841260, EPI_ISL_1841261, EPI_ISL_1841262, EPI_ISL_1841263, EPI_ISL_1841264, EPI_ISL_1841265, EPI_ISL_1841266, EPI_ISL_1841267, EPI_ISL_1841268, EPI_ISL_1841269, EPI_ISL_1841270, EPI_ISL_1841271, EPI_ISL_1841272, EPI_ISL_1841273, EPI_ISL_1841276, EPI_ISL_1841279, EPI_ISL_1841280, EPI_ISL_1841281, EPI_ISL_1841282, EPI_ISL_1841283,                                                                                                                                                                                                                                                                                                                                                                                                                                                                           | see above                                                                  | ICMR-National Institute of Virology                                                                                                                                                                                                                                                                                                                                                                                                                           |                                                                                                                                                                                                                                                                                                                                                                                                         |

[illegible]

|                                                                                                                                                                                                                                                                                                                                                                                                                                                                                                                                                                                                                                                                                                                                                                                             |                                                                                                                                                                                |                                                                                                                                                                                                                                                         |                                                                                                                                                                                                                                                                                                                                                                                                                                                                                                                                                                                                                                                                                                                                                                                               |
|---------------------------------------------------------------------------------------------------------------------------------------------------------------------------------------------------------------------------------------------------------------------------------------------------------------------------------------------------------------------------------------------------------------------------------------------------------------------------------------------------------------------------------------------------------------------------------------------------------------------------------------------------------------------------------------------------------------------------------------------------------------------------------------------|--------------------------------------------------------------------------------------------------------------------------------------------------------------------------------|---------------------------------------------------------------------------------------------------------------------------------------------------------------------------------------------------------------------------------------------------------|-----------------------------------------------------------------------------------------------------------------------------------------------------------------------------------------------------------------------------------------------------------------------------------------------------------------------------------------------------------------------------------------------------------------------------------------------------------------------------------------------------------------------------------------------------------------------------------------------------------------------------------------------------------------------------------------------------------------------------------------------------------------------------------------------|
| EPI_ISL_1701391                                                                                                                                                                                                                                                                                                                                                                                                                                                                                                                                                                                                                                                                                                                                                                             | INT Fondazione Pascale                                                                                                                                                         | INT Fondazione Pascale                                                                                                                                                                                                                                  | INT Fondazione Pascale                                                                                                                                                                                                                                                                                                                                                                                                                                                                                                                                                                                                                                                                                                                                                                        |
| EPI_ISL_2604874, EPI_ISL_2604876, EPI_ISL_2604878, EPI_ISL_2604879                                                                                                                                                                                                                                                                                                                                                                                                                                                                                                                                                                                                                                                                                                                          | INTERLAB                                                                                                                                                                       | Omics Sciences Laboratory                                                                                                                                                                                                                               | Darlyn Amaya; Derly Andrade Molina; Gabriel Morey León; Juan Carlos Fernández Cadena; Rubén Armas González                                                                                                                                                                                                                                                                                                                                                                                                                                                                                                                                                                                                                                                                                    |
| EPI_ISL_2577027                                                                                                                                                                                                                                                                                                                                                                                                                                                                                                                                                                                                                                                                                                                                                                             | IRCCS San Gallicano Dermatological Institute                                                                                                                                   | IRCCS Regina Elena National Cancer Institute                                                                                                                                                                                                            | Aldo Morrone; Eleonora Sperandio; Fabrizio Ensoli; Frauke Goeman; Fulvia Pimpinelli; Gennaro Ciliberto; Giovanni Blandino; Giulia Orlandi; Maurizio Fanciulli; Valentina Ricca                                                                                                                                                                                                                                                                                                                                                                                                                                                                                                                                                                                                                |
| EPI_ISL_1434565                                                                                                                                                                                                                                                                                                                                                                                                                                                                                                                                                                                                                                                                                                                                                                             | Ibaraki Prefectural Institute of Public Health                                                                                                                                 | Ibaraki Prefectural Institute of Public Health                                                                                                                                                                                                          | Keiko Goto; Kentaro Itokawa; Makoto Kuroda; Masanori Hashino; Rina Tanaka; Tsuyoshi Sekizuka                                                                                                                                                                                                                                                                                                                                                                                                                                                                                                                                                                                                                                                                                                  |
| EPI_ISL_2322996                                                                                                                                                                                                                                                                                                                                                                                                                                                                                                                                                                                                                                                                                                                                                                             | Imeda Hospital                                                                                                                                                                 | Imeda Hospital                                                                                                                                                                                                                                          | Dagmar Obbels; Hanne Valgaeren; Johan Frans                                                                                                                                                                                                                                                                                                                                                                                                                                                                                                                                                                                                                                                                                                                                                   |
| EPI_ISL_2790553                                                                                                                                                                                                                                                                                                                                                                                                                                                                                                                                                                                                                                                                                                                                                                             | Imelda Ziekenhuis                                                                                                                                                              | Imelda Ziekenhuis                                                                                                                                                                                                                                       | Dagmar Obbels; Hanne Valgaeren; Johan Frans                                                                                                                                                                                                                                                                                                                                                                                                                                                                                                                                                                                                                                                                                                                                                   |
| EPI_ISL_481166                                                                                                                                                                                                                                                                                                                                                                                                                                                                                                                                                                                                                                                                                                                                                                              | Immunogenomics lab, Institute of Life Sciences, Bhubaneswar                                                                                                                    | Immunogenomics lab, Institute of Life Sciences, Bhubaneswar                                                                                                                                                                                             | Ajay Parida; Amol Ratnakar Suryawanshi; Ankita Datey; Arup Ghosh; Atimukta Jha; Auromira Khuntia; Bharati Singh; DBT's PAN-INDIA 1000 SARS-CoV2 RNA genome sequencing consortium; Deepika Singh; Dileep Vasudevan; Ghulam Hussain Syed; Manasi Priyadarshini; Neha Singh; Orissa COVID-19 Study Group; P. Sushree Shyamli; Punit Prasad; Rajeeb Swain; Rupesh Dash; Shanti Senapati; Soma Chattopadhyay; Sunil Raghav; Swati Madhulika; Tsheten Sheropa; Tushar K. Beuria; Viplov K. Biswas                                                                                                                                                                                                                                                                                                   |
| EPI_ISL_1662447, EPI_ISL_1662451, EPI_ISL_1663552, EPI_ISL_1663553, EPI_ISL_1663554, EPI_ISL_1663555, EPI_ISL_1663557, EPI_ISL_1663558, EPI_ISL_1663561, EPI_ISL_1663562, EPI_ISL_1663563, EPI_ISL_1663564                                                                                                                                                                                                                                                                                                                                                                                                                                                                                                                                                                                  | Immunogenomics lab, Institute of Life Sciences, Bhubaneswar                                                                                                                    | Institute of Life Sciences - INSACOG                                                                                                                                                                                                                    | Ajay Parida; Amol M. Kanampalliwar; Arup Ghosh; Atimukta Jha; INSACOG Consortium; Punit Prasad; Rajeeb Swain; Rupesh Dash; Safal Walia; Shifu Aggarwal; Sunil K. Raghav                                                                                                                                                                                                                                                                                                                                                                                                                                                                                                                                                                                                                       |
| see above                                                                                                                                                                                                                                                                                                                                                                                                                                                                                                                                                                                                                                                                                                                                                                                   | Immunology, Noguchi Memorial Institute for Medical Research                                                                                                                    | Immunology, Noguchi Memorial Institute for Medical Research                                                                                                                                                                                             | Adu, B.; Adusei-Poku; Agbenyo; Agbodzi, B.; Ampofo; Appiah-Kubi, J.; Asare; Attiku; Bonney; Egyir, B.; J.K.; K.M.; K.O.; Kumordjie, S.; M.A.; Mohktar, Q.; Odoom; Opoku Frempong, H.; Oteng, F.; Owusu-Nyantakyi, C.; P.O.; S.B.; Uche; W.K.; Yeboah, C.                                                                                                                                                                                                                                                                                                                                                                                                                                                                                                                                      |
| EPI_ISL_1018089, EPI_ISL_2001078, EPI_ISL_2001090, EPI_ISL_2508378, EPI_ISL_2508380                                                                                                                                                                                                                                                                                                                                                                                                                                                                                                                                                                                                                                                                                                         | Incienza, Instituto Costarricense de Investigación y Enseñanza en Nutrición y Salud                                                                                            | Incienza, Instituto Costarricense de Investigación y Enseñanza en Nutrición y Salud                                                                                                                                                                     | Barboza-Arguedas E & Centeno-Miranda M; Cristian Pérez-Corrales; Valeria Peralta-Barquero & César Cerdas Quesada                                                                                                                                                                                                                                                                                                                                                                                                                                                                                                                                                                                                                                                                              |
| EPI_ISL_1517410, EPI_ISL_1517433                                                                                                                                                                                                                                                                                                                                                                                                                                                                                                                                                                                                                                                                                                                                                            | Indian Council of Medical Research - National Institute of Virology                                                                                                            | National Influenza Center, Indian Council of Medical Research - National Institute of Virology                                                                                                                                                          | Choudhary ML; Potdar V; Shete-Aich A; Yadav PD                                                                                                                                                                                                                                                                                                                                                                                                                                                                                                                                                                                                                                                                                                                                                |
| EPI_ISL_2364567                                                                                                                                                                                                                                                                                                                                                                                                                                                                                                                                                                                                                                                                                                                                                                             | Infectious Diseases and Tropical Medicine Research Center, Isfahan University of Medical Sciences, Isfahan, Iran                                                               | Genetics Research Center, University of Social Welfare and Rehabilitation Sciences                                                                                                                                                                      | Behrooz Ataei; Hamed Fakhim; Hossein Najmabadi.; Kimia Kahrizi; Marzieh Mohseni; Zohreh Fattahi                                                                                                                                                                                                                                                                                                                                                                                                                                                                                                                                                                                                                                                                                               |
| EPI_ISL_2466400                                                                                                                                                                                                                                                                                                                                                                                                                                                                                                                                                                                                                                                                                                                                                                             | Inst. for Med. Virology, University Hospital Frankfurt, Goethe University Frankfurt                                                                                            | Inst. for Med. Virology, University Hospital Frankfurt, Goethe University Frankfurt                                                                                                                                                                     | Goetsch, U.; Gottschalk; H.F.; Pallas, C.; R. and Ciesek, S.; Rabenau; Toptan, T.; Widera, M.; Wilhelm, A.                                                                                                                                                                                                                                                                                                                                                                                                                                                                                                                                                                                                                                                                                    |
| EPI_ISL_1013421                                                                                                                                                                                                                                                                                                                                                                                                                                                                                                                                                                                                                                                                                                                                                                             | Institut Pasteur de Guadeloupe                                                                                                                                                 | National Reference Center for Viruses of Respiratory Infections, Institut Pasteur, Paris                                                                                                                                                                | Angela Brisebarre; Camille Capel; Etienne Simon-Lorière; Marion Barbet; Maud Vanpeene; Méline Bizard; Sylvie Behillili; Sylvie van der Werf; Talarmin Antoine; Vincent Enouf                                                                                                                                                                                                                                                                                                                                                                                                                                                                                                                                                                                                                  |
| EPI_ISL_999032                                                                                                                                                                                                                                                                                                                                                                                                                                                                                                                                                                                                                                                                                                                                                                              | Institut Pasteur de Guinée                                                                                                                                                     | Institut Pasteur de Dakar                                                                                                                                                                                                                               | Dia Ndongo; Diagne Moussa Moïse; Diallo Amadou; Diop Mamadou; Faye Ousmane; Grayo Solene; Loucoubar Cheikh; Mbengue Safietou Sankhe; Ndiaye Ndack; Sali Amadou Alpha; Tordo Noel                                                                                                                                                                                                                                                                                                                                                                                                                                                                                                                                                                                                              |
| EPI_ISL_613421                                                                                                                                                                                                                                                                                                                                                                                                                                                                                                                                                                                                                                                                                                                                                                              | Institut Pasteur de la Guadeloupe                                                                                                                                              | Institut Pasteur de la Guadeloupe                                                                                                                                                                                                                       | Angela Brisebarre; Antoine Talarmin; Camille Capel; Etienne Simon-Lorière; Marion Barbet; Maud Vanpeene; Méline Bizard; Stéphanie Guyomard; Sylvie Behillili; Sylvie van der Werf; Sébastien Breurec; Vincent Enouf                                                                                                                                                                                                                                                                                                                                                                                                                                                                                                                                                                           |
| EPI_ISL_437992                                                                                                                                                                                                                                                                                                                                                                                                                                                                                                                                                                                                                                                                                                                                                                              | Institut für Virologie am Department für Hygiene, Mikrobiologie und Public Health                                                                                              | Berghthaler laboratory, CeMM Research Center for Molecular Medicine of the Austrian Academy of Sciences                                                                                                                                                 | Alexander Lercher; Alexandra Popa; Andreas Berghthaler; Benedikt Agerer; Christoph Bock; Dorothee von Laer; Elisabeth Puchhammer-Stoeckl; Guenter Weiss; Henrique Colaco; Jakob-Wendelin Genger; Jan Laine; Judith Aberle; Lukas Endler; Manfred Nairz; Mark Smyth; Martin Senekowitsch; Michael Schuster; Stephan Aberle; Thomas Penz; Wegene Borena                                                                                                                                                                                                                                                                                                                                                                                                                                         |
| EPI_ISL_1498151, EPI_ISL_1657076, EPI_ISL_1915113                                                                                                                                                                                                                                                                                                                                                                                                                                                                                                                                                                                                                                                                                                                                           | Institute for Developing Science and Health Initiatives (ideSHI)                                                                                                               | Institute for Developing Science and Health Initiatives (ideSHI)                                                                                                                                                                                        | Fidausi Qadri; Hassan Afrad; Sadia Rahman; Tahmina Shirin                                                                                                                                                                                                                                                                                                                                                                                                                                                                                                                                                                                                                                                                                                                                     |
| EPI_ISL_853861                                                                                                                                                                                                                                                                                                                                                                                                                                                                                                                                                                                                                                                                                                                                                                              | Institute for Laboratory Diagnostics and Microbiology, Klinikum Klagenfurt am Werthersee                                                                                       | Berghthaler laboratory, CeMM Research Center for Molecular Medicine of the Austrian Academy of Sciences                                                                                                                                                 | Alexander Lercher; Alexandra Popa; Andreas Berghthaler; Anna Schedi; Benedikt Agerer; Christoph Bock; Jakob-Wendelin Genger; Jan Laine; Lukas Endler; Martin Senekowitsch; Michael Schuster; Thomas Penz                                                                                                                                                                                                                                                                                                                                                                                                                                                                                                                                                                                      |
| EPI_ISL_1591285, EPI_ISL_1904548                                                                                                                                                                                                                                                                                                                                                                                                                                                                                                                                                                                                                                                                                                                                                            | Institute for Public Health of Šibenik-Knin County                                                                                                                             | Croatian Institute of Public Health                                                                                                                                                                                                                     | Irena Tabain; Ivana Ferenčak                                                                                                                                                                                                                                                                                                                                                                                                                                                                                                                                                                                                                                                                                                                                                                  |
| EPI_ISL_572333                                                                                                                                                                                                                                                                                                                                                                                                                                                                                                                                                                                                                                                                                                                                                                              | Institute for Virology, University Hospital Duesseldorf, Medical Faculty, Heinrich-Heine-University Duesseldorf                                                                | Institute for Virology, University Hospital Duesseldorf, Medical Faculty, Heinrich-Heine-University Duesseldorf                                                                                                                                         | ; Alexander Killer; Andreas Walker; Annemarie Mohring; Anselm Kunstein; Ansgar Schulz; Björn Jensen; Caroline Klinkt; Edwin Bülke; Gerald Antoch; Heiner Schaal; Jennifer Neubert; Johannes Bode; Johannes C. Fischer; Jörg Timm; Lisa Müller; Maximilian Damagnez; Nadine Lübke; Ortwin Adams; Philipp Albrecht; Philipp Ostermann; Saskia Elben; Tina Senff; Tom Lüdde; Torsten Feldt; Verena Keitel                                                                                                                                                                                                                                                                                                                                                                                        |
| EPI_ISL_2774071                                                                                                                                                                                                                                                                                                                                                                                                                                                                                                                                                                                                                                                                                                                                                                             | Institute of Epidemiology, Disease Control and Research (IEDCR)                                                                                                                | IEDCR-ideSHI-icddr,b                                                                                                                                                                                                                                    | Firdausi Qadri; Hassan Afrad; Manjur Hossain Khan; Sadia Rahman; Tahmina Shirin                                                                                                                                                                                                                                                                                                                                                                                                                                                                                                                                                                                                                                                                                                               |
| EPI_ISL_1582390, EPI_ISL_1582394, EPI_ISL_1582396, EPI_ISL_1915436, EPI_ISL_1915437, EPI_ISL_1915439, EPI_ISL_1938475, EPI_ISL_1938476, EPI_ISL_1938477                                                                                                                                                                                                                                                                                                                                                                                                                                                                                                                                                                                                                                     | Institute of Epidemiology, Disease Control and Research (IEDCR)                                                                                                                | Institute for Developing Science and Health Initiatives (ideSHI)                                                                                                                                                                                        | Firdausi Qadri; Hassan Afrad; Manjur Hossain Khan; Sadia Rahman; Tahmina Shirin                                                                                                                                                                                                                                                                                                                                                                                                                                                                                                                                                                                                                                                                                                               |
| see above                                                                                                                                                                                                                                                                                                                                                                                                                                                                                                                                                                                                                                                                                                                                                                                   | Institute of Epidemiology, Disease Control and Research (IEDCR)                                                                                                                | ideSHI-IEDCR-icddr,b                                                                                                                                                                                                                                    | Firdausi Qadri; Hassan Afrad; Manjur Hossain Khan; Sadia Rahman; Tahmina Shirin                                                                                                                                                                                                                                                                                                                                                                                                                                                                                                                                                                                                                                                                                                               |
| EPI_ISL_2105565                                                                                                                                                                                                                                                                                                                                                                                                                                                                                                                                                                                                                                                                                                                                                                             | Institute of Epidemiology, Disease Control and Research (IEDCR)                                                                                                                | ideSHI-IEDCR-icddr,b                                                                                                                                                                                                                                    | Firdausi Qadri; Hassan Afrad; Manjur Hossain Khan; Sadia Rahman; Tahmina Shirin                                                                                                                                                                                                                                                                                                                                                                                                                                                                                                                                                                                                                                                                                                               |
| EPI_ISL_2341665, EPI_ISL_2341682, EPI_ISL_2341695, EPI_ISL_2341698, EPI_ISL_2341699, EPI_ISL_2341701, EPI_ISL_2341704, EPI_ISL_2341706, EPI_ISL_2341712, EPI_ISL_2341763, EPI_ISL_2341779, EPI_ISL_2341783, EPI_ISL_2341785, EPI_ISL_2341842, EPI_ISL_2341847, EPI_ISL_2341924, EPI_ISL_2341925, EPI_ISL_2341926, EPI_ISL_2341941, EPI_ISL_2341942, EPI_ISL_2341998, EPI_ISL_2342017, EPI_ISL_2342021, EPI_ISL_2342028, EPI_ISL_2342062, EPI_ISL_2342072, EPI_ISL_2342074, EPI_ISL_2342104, EPI_ISL_2342115, EPI_ISL_2342120, EPI_ISL_2342260, EPI_ISL_2342284, EPI_ISL_2342359, EPI_ISL_2342360, EPI_ISL_2342362, EPI_ISL_2342363, EPI_ISL_2342604, EPI_ISL_2342639, EPI_ISL_2342645, EPI_ISL_2342652, EPI_ISL_2342666, EPI_ISL_2342671, EPI_ISL_2342695, EPI_ISL_2342846, EPI_ISL_2342980 | Institute of Life Sciences, Bhubaneswar                                                                                                                                        | Ajay Parida; Amol M. Kanampalliwar; Arup Ghosh; Atimukta Jha; INSACOG Consortium; Omprakash Shiriwas; Punit Prasad; Rajeeb Swain; Rupesh Dash; Safal Walia; Sana Fatma; Shifu Aggarwal; Sunil K. Raghav                                                 |                                                                                                                                                                                                                                                                                                                                                                                                                                                                                                                                                                                                                                                                                                                                                                                               |
| see above                                                                                                                                                                                                                                                                                                                                                                                                                                                                                                                                                                                                                                                                                                                                                                                   | Institute of Microbiology Universidad San Francisco de Quito                                                                                                                   | Institute of Microbiology Universidad San Francisco de Quito                                                                                                                                                                                            | Alejandra Ramones; Belen Prado-Vivar; Bernardo Gutierrez; Edison Ligha; Francisco Mora; Franklin Espinoza; Gabriel Trueba; Jorge Reyes; Juan Gaviria; Juan Jose Guadalupe; Michelle Grunauer; Patricio Rojas-Silva; Paul Cardenas; Sully Marquez; Veronica Barragan                                                                                                                                                                                                                                                                                                                                                                                                                                                                                                                           |
| EPI_ISL_477016, EPI_ISL_486849, EPI_ISL_516652, EPI_ISL_539792, EPI_ISL_697798, EPI_ISL_697799, EPI_ISL_728202, EPI_ISL_824284, EPI_ISL_1738805, EPI_ISL_1805659, EPI_ISL_2004104, EPI_ISL_2100427, EPI_ISL_2134872, EPI_ISL_2228102, EPI_ISL_2228104, EPI_ISL_2488768, EPI_ISL_2492350, EPI_ISL_2603826, EPI_ISL_2603828                                                                                                                                                                                                                                                                                                                                                                                                                                                                   | Institute of Microbiology, Universidad San Francisco de Quito                                                                                                                  | Institute of Microbiology, Universidad San Francisco de Quito                                                                                                                                                                                           | Belén Prado-Vivar; Bernardo Darquea; Bernardo Gutiérrez; Carla Torres; Carlos Mena; Christian Zambrano; David Zuñiga; Diana Zambrano; Edison Chavez; Edy Quizhpe; Fernanda Zurita; Fernanda Zurita; Fernando Serrano; Fredy Loor; Gabriel Trueba; Guzmán Bernabéu Lorenzo; Jonathan Araujo; Jorge Luis Velez; Juan Carlos Zuñiga; Juan José Guadalupe; Juan Zuñiga; Katherine Ojeda; Lofreine Vera; Ligia Briceño; Lofreine Vera; Luis Flores; Manuel Jibaja; Mayra Beltrán; Melissa Ortega; Michelle Grunauer; Milton Tobar; Monica Becerra-Wong; Nabih Dahik; Nelson Montalvan; Oscar Mena; Paola Dalgo; Patricio Reyes; Patricio Rojas-Silva; Paúl Cárdenas; Prado-Vivar; Raiza Briceño; Rommel Guevara; Sully Márquez; Tania Guayasamin; Tanya Guayasamin; Verónica Barragán; Yomara Napa |
| EPI_ISL_1443652                                                                                                                                                                                                                                                                                                                                                                                                                                                                                                                                                                                                                                                                                                                                                                             | Institute of Microbiology, Universidad San Francisco de Quito                                                                                                                  | Omics Sciences Laboratory                                                                                                                                                                                                                               | ; Andrea Cungan; Belén Prado-Vivar; Bernardo Gutiérrez; Darlyn Amaya; Dayron Brossad; Derly Andrade Molina; Emily Sulay Salto Montalvo; Fernanda Zurita; Gabriel Morey León; Gabriel Trueba; Juan Carlos Fernández Cadena; Juan José Guadalupe; Katheryn Sacheri Viteri; Michelle Grunauer; Monica Becerra-Wong; Nabih Dahik; Patricio Rojas-Silva; Paula Juliana Gavilanes Jarrín; Paúl Cárdenas; Rubén Armas González; Sully Márquez; Verónica Barragán                                                                                                                                                                                                                                                                                                                                     |
| EPI_ISL_1745707, EPI_ISL_2346356, EPI_ISL_2346376                                                                                                                                                                                                                                                                                                                                                                                                                                                                                                                                                                                                                                                                                                                                           | Institute of Molecular and Translational Medicine / Laboratory of Experimental Medicine, Faculty of Medicine and Dentistry, Palacky University and University Hospital Olomouc | Institute of Molecular and Translational Medicine / Laboratory of Experimental Medicine, Faculty of Medicine and Dentistry, Palacky University                                                                                                          | Barbora Blumová; Hana Jaworek; Marián Hajdúch; Rastislav Slavkovský; Tomáš Pošpišil; Vladimíra Koudeláková                                                                                                                                                                                                                                                                                                                                                                                                                                                                                                                                                                                                                                                                                    |
| EPI_ISL_2420421                                                                                                                                                                                                                                                                                                                                                                                                                                                                                                                                                                                                                                                                                                                                                                             | Institute of Public Health Varaždin County                                                                                                                                     | Croatian Institute of Public Health                                                                                                                                                                                                                     | Irena Tabain; Ivana Ferenčak                                                                                                                                                                                                                                                                                                                                                                                                                                                                                                                                                                                                                                                                                                                                                                  |
| EPI_ISL_2625681                                                                                                                                                                                                                                                                                                                                                                                                                                                                                                                                                                                                                                                                                                                                                                             | Institute of Public Health of Zagreb County                                                                                                                                    | Croatian Institute of Public Health                                                                                                                                                                                                                     | Irena Tabain; Ivana Ferenčak                                                                                                                                                                                                                                                                                                                                                                                                                                                                                                                                                                                                                                                                                                                                                                  |
| EPI_ISL_852660, EPI_ISL_1805024                                                                                                                                                                                                                                                                                                                                                                                                                                                                                                                                                                                                                                                                                                                                                             | Institute of Virology, Medical Center, University of Freiburg, Freiburg, Germany                                                                                               | Institute of Virology, Clinial Virus Genomics, Medical Center, University of Freiburg, Freiburg, Germany                                                                                                                                                | Hajo Grundmann; Jonas Fuchs; Lena Jaki; Lisa Kern; Marcus Panning; Sandra Reuter                                                                                                                                                                                                                                                                                                                                                                                                                                                                                                                                                                                                                                                                                                              |
| EPI_ISL_2344266, EPI_ISL_2344303, EPI_ISL_2344426                                                                                                                                                                                                                                                                                                                                                                                                                                                                                                                                                                                                                                                                                                                                           | Instituto Butantan                                                                                                                                                             | Instituto de Medicina Tropical de Sao Paulo                                                                                                                                                                                                             | Brazil-UK Centre for Arbovirus Discovery Diagnosis Genomics and Epidemiology (CADDE) Genomic Network - Instituto de Medicina Tropical                                                                                                                                                                                                                                                                                                                                                                                                                                                                                                                                                                                                                                                         |
| EPI_ISL_2348777                                                                                                                                                                                                                                                                                                                                                                                                                                                                                                                                                                                                                                                                                                                                                                             | Instituto Nacional De Investigación En Salud Pública-Crn De Influenza Y Otros Virus Respiratorios                                                                              | NIC-Instituto Nacional de Investigación en Salud Pública                                                                                                                                                                                                | Alfredo Bruno; Domenica de Mora.; Jimmy Garcés; Johanna Laines; Lizbeth Patiño; Manuel Gonzalez; Maritza Olmedo; Michelle Páez                                                                                                                                                                                                                                                                                                                                                                                                                                                                                                                                                                                                                                                                |
| EPI_ISL_491948                                                                                                                                                                                                                                                                                                                                                                                                                                                                                                                                                                                                                                                                                                                                                                              | Instituto Nacional de Investigación en Salud Pública - INSPI                                                                                                                   | INSPI - Charité                                                                                                                                                                                                                                         | Alberto Orlando; Alexandra Usiña; Alfredo Bruno Caicedo; Andres Moreira-Soto; Anna-Lena Sander; Denisses Portugal; Domenica de Mora Coloma; Jan Felix Drexler; Juan Carlos Zeballos; Manuel Gonzalez; Maritza Olmedo; Nina Krause; Silvia Salgado                                                                                                                                                                                                                                                                                                                                                                                                                                                                                                                                             |
| EPI_ISL_2492739, EPI_ISL_2492777, EPI_ISL_2492788, EPI_ISL_2492791, EPI_ISL_2492814, EPI_ISL_2492870, EPI_ISL_2492899, EPI_ISL_2493084, EPI_ISL_2493086                                                                                                                                                                                                                                                                                                                                                                                                                                                                                                                                                                                                                                     | Instituto Nacional de Investigación em Saúde                                                                                                                                   | CERI, Centre for Epidemic Response and Innoation, Stellenbosch University and KRISP, KZN Research Innovation and Sequencing Platform, UKZN.                                                                                                             | Afonso P; David K; Emmanuel SJ; Freitas RH; Giandhari J; Inglês L; Lutucuta S; Miranda J; Morais J; Mufinda M; Naidoo Y; Neto Z; Paulo A Carralero RR Paixão JP; Pereira A; Pillay S; Tegally H; Wilkinson E; de Oliveira T                                                                                                                                                                                                                                                                                                                                                                                                                                                                                                                                                                   |
| EPI_ISL_1545310, EPI_ISL_1545372, EPI_ISL_2494743, EPI_ISL_2494862, EPI_ISL_2494867, EPI_ISL_2494868, EPI_ISL_2494944, EPI_ISL_2609491, EPI_ISL_2609532                                                                                                                                                                                                                                                                                                                                                                                                                                                                                                                                                                                                                                     | Instituto Nacional de Investigación em Saúde                                                                                                                                   | KRISP, KZN Research Innovation and Sequencing Platform                                                                                                                                                                                                  | Afonso P; David K; Emmanuel SJ; Freitas RH; Giandhari J; Inglês L; Lutucuta S; Miranda J; Morais J; Mufinda M; Naidoo Y; Neto Z; Paulo A Carralero RR Paixão JP; Pereira A; Pillay S; Tegally H; Wilkinson E; de Oliveira T                                                                                                                                                                                                                                                                                                                                                                                                                                                                                                                                                                   |
| EPI_ISL_2500966                                                                                                                                                                                                                                                                                                                                                                                                                                                                                                                                                                                                                                                                                                                                                                             | Instituto Nacional de Salud                                                                                                                                                    | Instituto Nacional de Salud- Dirección de Investigación en Salud Pública                                                                                                                                                                                | Carlos Franco-Muñoz; Carmen Osorio; Diana Malo; Diego A. Álvarez-Díaz; Diego Andrés Prada; Gerardo Santamaría; Hector Alejandro Ruiz-Moreno; Jhonnatan Reales-González; Jorge Rivera; Juan Camilo Martínez; Julian Naizaque; Katherine Laiton-Donato; Lisseth Pardo; Magdalena Wiesner; Marcela Mercado-Reyes; Maria T. Herrera-Sepúlveda; Marta Lopez Blanco; Martha Lucia Ospina Martinez; Paola Rojas; Sergio Gomez; Sheryll Corchuelo; Angela Alarcon Cruz                                                                                                                                                                                                                                                                                                                                |
| EPI_ISL_456126                                                                                                                                                                                                                                                                                                                                                                                                                                                                                                                                                                                                                                                                                                                                                                              | Instituto Nacional de Salud - Unidad de Secuenciación y Análisis Genómico                                                                                                      | Instituto Nacional de Salud, Universidad Cooperativa de Colombia, Instituto Alexander von Humboldt, Imperial College-London, London School of Hygiene & Tropical Medicine                                                                               | Astrid C. Flórez; Carlos Franco-Muñoz; Christian Julian Villabona-Arenas; Diana Marcela Walteros-Acero; Diego A. Álvarez-Díaz; Erika Ospitia; Gloria Puerto; Jose A. Usme-Ciro; Juliana Barbosa; Katherine Laiton-Donato; Liz Villabona-Arenas; Luz Dary Rodriguez; Mailyn A.Gonzalez; Marcela Mercado-Reyes.; Martha Lucia Ospina Martinez; Nicolas D. Franco-Sierra; Sergio Gomez-Rangel; Sussy Echeverria; Zulma M. Cucunubá                                                                                                                                                                                                                                                                                                                                                               |
| EPI_ISL_942006                                                                                                                                                                                                                                                                                                                                                                                                                                                                                                                                                                                                                                                                                                                                                                              | Instituto Nacional de Salud, Bogotá, Colombia                                                                                                                                  | Centro de Investigaciones en Microbiología y Biotecnología-UR (CIMBIUR), Facultad de Ciencias Naturales, Universidad del Rosario, Bogotá, Colombia Instituto Nacional de Salud, Bogotá, Colombia Icahn School of Medicine at Mount Sinai, New York, USA | Adriana van de Guchte; Alberto Paniz-Mondolfi; Ana S. Gonzalez-Reiche; Carolina Flórez; Carolina Hernández; Emilia Lia Sordillo; Hala Alejel Alshammary; Harm van Bakel; Jayeeta Dutta; Juan David Ramírez; Luz Helena Patiño; Marina Muñoz; Matthew M. Hernandez; Nathalia Ballesteros; Sergio Gomez; Viviana Simon; Zenab Khan                                                                                                                                                                                                                                                                                                                                                                                                                                                              |
| EPI_ISL_526964, EPI_ISL_653745,                                                                                                                                                                                                                                                                                                                                                                                                                                                                                                                                                                                                                                                                                                                                                             | Instituto Nacional de Salud, Bogotá, Colombia                                                                                                                                  | Instituto Nacional de Salud, Bogotá, Colombia                                                                                                                                                                                                           | Astrid C. Flórez; Carlos Andrés Durán; Carlos Franco-Muñoz; Carolina Ferro; Christian Julian Villabona-Arenas; Diana Marcela Walteros-Acero; Diego A. Álvarez-Díaz; Diego Andrés Prada; Edmlison F. de Oliveira-Filho; Felix Betzler; Franklin Prieto; Jeadran Malagón-Rojas; Jonathan Reales; Jose A. Usme-Ciro; Katherine Laiton-Donato; Liz Villabona-Arenas; Magdalena Weisner; Marcela Mercado-Reyes; Martha Lucia Ospina Martinez; Mauricio Pacheco-Montealegre; Sheryl                                                                                                                                                                                                                                                                                                                 |

|                                                                                                                                                                                                                                                                                                                                                                                                                                                                                                                                                                                                                                                                                                                                                                                                                                                                                                                                                                                                                                                                                                                                                                                                                                                                                                                                                                                                                                                                                                                                                                                                                                                                                                                                                                                                                                                                                                                                                                                                                                                                                                                                                                                                                                                                                                                                                                                                                                                                                                                                                                                                                                                                                                                                                                                                                                                                                                                                                                                                                                                                                                                                                                                                                                                                                                                                                                                                                                                                                                                                                                                                                                                                                                                                                                                                                                                                                                                                                                                                                                                                                                                                                                                                                                                                                                                                                                                                                                                                                                                                                                                                                                                                                                                                                                                                                                                                                                                                                                                                                                                                                                                                                                                                                                                                                                                                                                                                                                                                                                                                                                                                                                                                                                                                                                      |                                                                                                                                                                                                                           |                                                                                                                                                                                                                                                                                                                                                                                 |                                                                                                                                                                                                                                                                                                                                                                                                                                                                                                                                                                                                                      |
|----------------------------------------------------------------------------------------------------------------------------------------------------------------------------------------------------------------------------------------------------------------------------------------------------------------------------------------------------------------------------------------------------------------------------------------------------------------------------------------------------------------------------------------------------------------------------------------------------------------------------------------------------------------------------------------------------------------------------------------------------------------------------------------------------------------------------------------------------------------------------------------------------------------------------------------------------------------------------------------------------------------------------------------------------------------------------------------------------------------------------------------------------------------------------------------------------------------------------------------------------------------------------------------------------------------------------------------------------------------------------------------------------------------------------------------------------------------------------------------------------------------------------------------------------------------------------------------------------------------------------------------------------------------------------------------------------------------------------------------------------------------------------------------------------------------------------------------------------------------------------------------------------------------------------------------------------------------------------------------------------------------------------------------------------------------------------------------------------------------------------------------------------------------------------------------------------------------------------------------------------------------------------------------------------------------------------------------------------------------------------------------------------------------------------------------------------------------------------------------------------------------------------------------------------------------------------------------------------------------------------------------------------------------------------------------------------------------------------------------------------------------------------------------------------------------------------------------------------------------------------------------------------------------------------------------------------------------------------------------------------------------------------------------------------------------------------------------------------------------------------------------------------------------------------------------------------------------------------------------------------------------------------------------------------------------------------------------------------------------------------------------------------------------------------------------------------------------------------------------------------------------------------------------------------------------------------------------------------------------------------------------------------------------------------------------------------------------------------------------------------------------------------------------------------------------------------------------------------------------------------------------------------------------------------------------------------------------------------------------------------------------------------------------------------------------------------------------------------------------------------------------------------------------------------------------------------------------------------------------------------------------------------------------------------------------------------------------------------------------------------------------------------------------------------------------------------------------------------------------------------------------------------------------------------------------------------------------------------------------------------------------------------------------------------------------------------------------------------------------------------------------------------------------------------------------------------------------------------------------------------------------------------------------------------------------------------------------------------------------------------------------------------------------------------------------------------------------------------------------------------------------------------------------------------------------------------------------------------------------------------------------------------------------------------------------------------------------------------------------------------------------------------------------------------------------------------------------------------------------------------------------------------------------------------------------------------------------------------------------------------------------------------------------------------------------------------------------------------------------------------------------------|---------------------------------------------------------------------------------------------------------------------------------------------------------------------------------------------------------------------------|---------------------------------------------------------------------------------------------------------------------------------------------------------------------------------------------------------------------------------------------------------------------------------------------------------------------------------------------------------------------------------|----------------------------------------------------------------------------------------------------------------------------------------------------------------------------------------------------------------------------------------------------------------------------------------------------------------------------------------------------------------------------------------------------------------------------------------------------------------------------------------------------------------------------------------------------------------------------------------------------------------------|
| EPI_ISL_653757,<br>EPI_ISL_653762,<br>EPI_ISL_739663                                                                                                                                                                                                                                                                                                                                                                                                                                                                                                                                                                                                                                                                                                                                                                                                                                                                                                                                                                                                                                                                                                                                                                                                                                                                                                                                                                                                                                                                                                                                                                                                                                                                                                                                                                                                                                                                                                                                                                                                                                                                                                                                                                                                                                                                                                                                                                                                                                                                                                                                                                                                                                                                                                                                                                                                                                                                                                                                                                                                                                                                                                                                                                                                                                                                                                                                                                                                                                                                                                                                                                                                                                                                                                                                                                                                                                                                                                                                                                                                                                                                                                                                                                                                                                                                                                                                                                                                                                                                                                                                                                                                                                                                                                                                                                                                                                                                                                                                                                                                                                                                                                                                                                                                                                                                                                                                                                                                                                                                                                                                                                                                                                                                                                                 |                                                                                                                                                                                                                           |                                                                                                                                                                                                                                                                                                                                                                                 | Corchuelo; Sussy Echeverria; Wendy K. Jo; Zulma M. Cucunubá                                                                                                                                                                                                                                                                                                                                                                                                                                                                                                                                                          |
| EPI_ISL_1424061                                                                                                                                                                                                                                                                                                                                                                                                                                                                                                                                                                                                                                                                                                                                                                                                                                                                                                                                                                                                                                                                                                                                                                                                                                                                                                                                                                                                                                                                                                                                                                                                                                                                                                                                                                                                                                                                                                                                                                                                                                                                                                                                                                                                                                                                                                                                                                                                                                                                                                                                                                                                                                                                                                                                                                                                                                                                                                                                                                                                                                                                                                                                                                                                                                                                                                                                                                                                                                                                                                                                                                                                                                                                                                                                                                                                                                                                                                                                                                                                                                                                                                                                                                                                                                                                                                                                                                                                                                                                                                                                                                                                                                                                                                                                                                                                                                                                                                                                                                                                                                                                                                                                                                                                                                                                                                                                                                                                                                                                                                                                                                                                                                                                                                                                                      | Instituto Nacional de Salud- Dirección de Investigación en Salud Pública                                                                                                                                                  | Instituto Nacional de Salud- Dirección de Investigación en Salud Pública                                                                                                                                                                                                                                                                                                        | Carlos Franco-Muñoz; Diego A. Álvarez-Díaz; Diego Andrés Prada; Gerardo Santamaría; Jhonnatan Reales-González; Julian Naizaque; Katherine Laiton-Donato; Magdalena Wiesner; Marcela Mercado-Reyes.; Maria T. Herrera-Sepúlveda; Martha Lucia Ospina Martínez; Mauricio Pacheco; Sheryll Corchuelo                                                                                                                                                                                                                                                                                                                    |
| EPI_ISL_956286                                                                                                                                                                                                                                                                                                                                                                                                                                                                                                                                                                                                                                                                                                                                                                                                                                                                                                                                                                                                                                                                                                                                                                                                                                                                                                                                                                                                                                                                                                                                                                                                                                                                                                                                                                                                                                                                                                                                                                                                                                                                                                                                                                                                                                                                                                                                                                                                                                                                                                                                                                                                                                                                                                                                                                                                                                                                                                                                                                                                                                                                                                                                                                                                                                                                                                                                                                                                                                                                                                                                                                                                                                                                                                                                                                                                                                                                                                                                                                                                                                                                                                                                                                                                                                                                                                                                                                                                                                                                                                                                                                                                                                                                                                                                                                                                                                                                                                                                                                                                                                                                                                                                                                                                                                                                                                                                                                                                                                                                                                                                                                                                                                                                                                                                                       | Instituto Nacional de Salud- Dirección de Redes de Laboratorios de Salud Pública                                                                                                                                          | Instituto Nacional de Salud- Dirección de Investigación en Salud Pública                                                                                                                                                                                                                                                                                                        | Carlos Franco-Muñoz; Diego A. Álvarez-Díaz; Diego Andrés Prada; Gerardo Santamaría; Hector Alejandro Ruiz-Moreno; Jhonnatan Reales-González; Julian Naizaque; Katherine Laiton-Donato; Magdalena Wiesner; Marcela Mercado-Reyes; Maria T. Herrera-Sepúlveda; Martha Lucia Ospina Martínez; Mauricio Pacheco-Montealegre; Sheryll Corchuelo & Robert Paulino-Ramirez; Alejandro Vallejo Degaudenzi; Victor Virgilio Calderon                                                                                                                                                                                          |
| EPI_ISL_2601034                                                                                                                                                                                                                                                                                                                                                                                                                                                                                                                                                                                                                                                                                                                                                                                                                                                                                                                                                                                                                                                                                                                                                                                                                                                                                                                                                                                                                                                                                                                                                                                                                                                                                                                                                                                                                                                                                                                                                                                                                                                                                                                                                                                                                                                                                                                                                                                                                                                                                                                                                                                                                                                                                                                                                                                                                                                                                                                                                                                                                                                                                                                                                                                                                                                                                                                                                                                                                                                                                                                                                                                                                                                                                                                                                                                                                                                                                                                                                                                                                                                                                                                                                                                                                                                                                                                                                                                                                                                                                                                                                                                                                                                                                                                                                                                                                                                                                                                                                                                                                                                                                                                                                                                                                                                                                                                                                                                                                                                                                                                                                                                                                                                                                                                                                      | Instituto de Medicina Tropical & Salud Global, Universidad Iberoamericana (UNIBE)                                                                                                                                         | Instituto de Medicina Tropical & Salud Global, Universidad Iberoamericana (UNIBE)                                                                                                                                                                                                                                                                                               |                                                                                                                                                                                                                                                                                                                                                                                                                                                                                                                                                                                                                      |
| EPI_ISL_2505257                                                                                                                                                                                                                                                                                                                                                                                                                                                                                                                                                                                                                                                                                                                                                                                                                                                                                                                                                                                                                                                                                                                                                                                                                                                                                                                                                                                                                                                                                                                                                                                                                                                                                                                                                                                                                                                                                                                                                                                                                                                                                                                                                                                                                                                                                                                                                                                                                                                                                                                                                                                                                                                                                                                                                                                                                                                                                                                                                                                                                                                                                                                                                                                                                                                                                                                                                                                                                                                                                                                                                                                                                                                                                                                                                                                                                                                                                                                                                                                                                                                                                                                                                                                                                                                                                                                                                                                                                                                                                                                                                                                                                                                                                                                                                                                                                                                                                                                                                                                                                                                                                                                                                                                                                                                                                                                                                                                                                                                                                                                                                                                                                                                                                                                                                      | Islab, Etelä-Savon aluelaboratorio                                                                                                                                                                                        | Expert Microbiology, National Institute for Health and Welfare                                                                                                                                                                                                                                                                                                                  | Carita Savolainen-Kopra; Erika Lindh; Haider al-Hello; Jani Halkilahti; Kirsi Liitsola; Niina Ikonen; Olli Vapalahti; Pekka Ellonen; Phuoc Truong; Päivi Laurila; Ravi Kant; Sari Hannula; Soile Blomqvist; Teemu Smura                                                                                                                                                                                                                                                                                                                                                                                              |
| EPI_ISL_2506825                                                                                                                                                                                                                                                                                                                                                                                                                                                                                                                                                                                                                                                                                                                                                                                                                                                                                                                                                                                                                                                                                                                                                                                                                                                                                                                                                                                                                                                                                                                                                                                                                                                                                                                                                                                                                                                                                                                                                                                                                                                                                                                                                                                                                                                                                                                                                                                                                                                                                                                                                                                                                                                                                                                                                                                                                                                                                                                                                                                                                                                                                                                                                                                                                                                                                                                                                                                                                                                                                                                                                                                                                                                                                                                                                                                                                                                                                                                                                                                                                                                                                                                                                                                                                                                                                                                                                                                                                                                                                                                                                                                                                                                                                                                                                                                                                                                                                                                                                                                                                                                                                                                                                                                                                                                                                                                                                                                                                                                                                                                                                                                                                                                                                                                                                      | Islab, Pohjois-Savon aluelaboratorio                                                                                                                                                                                      | Expert Microbiology, National Institute for Health and Welfare                                                                                                                                                                                                                                                                                                                  | Carita Savolainen-Kopra; Erika Lindh; Haider al-Hello; Jani Halkilahti; Kirsi Liitsola; Niina Ikonen; Olli Vapalahti; Pekka Ellonen; Phuoc Truong; Päivi Laurila; Ravi Kant; Sari Hannula; Soile Blomqvist; Teemu Smura                                                                                                                                                                                                                                                                                                                                                                                              |
| EPI_ISL_956393                                                                                                                                                                                                                                                                                                                                                                                                                                                                                                                                                                                                                                                                                                                                                                                                                                                                                                                                                                                                                                                                                                                                                                                                                                                                                                                                                                                                                                                                                                                                                                                                                                                                                                                                                                                                                                                                                                                                                                                                                                                                                                                                                                                                                                                                                                                                                                                                                                                                                                                                                                                                                                                                                                                                                                                                                                                                                                                                                                                                                                                                                                                                                                                                                                                                                                                                                                                                                                                                                                                                                                                                                                                                                                                                                                                                                                                                                                                                                                                                                                                                                                                                                                                                                                                                                                                                                                                                                                                                                                                                                                                                                                                                                                                                                                                                                                                                                                                                                                                                                                                                                                                                                                                                                                                                                                                                                                                                                                                                                                                                                                                                                                                                                                                                                       | Isolation - Virology Unit, Institut Pasteur du Cambodge; Sequencing - US National Institute of Allergy and Infectious Diseases Cambodia, US Naval Medical Research Unit -2, Cambodia National Institute for Public Health | Virology Unit, Institut Pasteur du Cambodge                                                                                                                                                                                                                                                                                                                                     | Chau Darapeak; Chin Savuth; Erik A Karlsson; Jennifer Bohl; Jessica Manning; Jose A Garcia-Rivera; Kraing Sidonn; Ly Sovann; Sophana Chea; Sreyngim Lay; Veasna Duong; Vireak Heang; Yi Sengdeourn                                                                                                                                                                                                                                                                                                                                                                                                                   |
| EPI_ISL_1240650                                                                                                                                                                                                                                                                                                                                                                                                                                                                                                                                                                                                                                                                                                                                                                                                                                                                                                                                                                                                                                                                                                                                                                                                                                                                                                                                                                                                                                                                                                                                                                                                                                                                                                                                                                                                                                                                                                                                                                                                                                                                                                                                                                                                                                                                                                                                                                                                                                                                                                                                                                                                                                                                                                                                                                                                                                                                                                                                                                                                                                                                                                                                                                                                                                                                                                                                                                                                                                                                                                                                                                                                                                                                                                                                                                                                                                                                                                                                                                                                                                                                                                                                                                                                                                                                                                                                                                                                                                                                                                                                                                                                                                                                                                                                                                                                                                                                                                                                                                                                                                                                                                                                                                                                                                                                                                                                                                                                                                                                                                                                                                                                                                                                                                                                                      | Israel Central Virology Laboratory                                                                                                                                                                                        | Israel National Consortium for SARS-CoV-2 sequencing                                                                                                                                                                                                                                                                                                                            | Assaf Rokney; Dana Bar-Ilan; David A. Zeevi; Efrat Dahan Bucris; Efrat Glick-Saar; Efrat Rorman; Ella Mendelson; Ephraim Fass; Eva Nachum; Gal Zizelski Valenci; Gideon Rechavi; Israel Nissan; Joseph Jaffe; Maya Davidovich Cohen; Michal Mandelboim; Mor Rubinstein; Neta Zuckerman; Omer Murik; Omri Nayshool; Oran Erster; Orna Mor; Tzvia Mann                                                                                                                                                                                                                                                                 |
| EPI_ISL_514284,<br>EPI_ISL_776808                                                                                                                                                                                                                                                                                                                                                                                                                                                                                                                                                                                                                                                                                                                                                                                                                                                                                                                                                                                                                                                                                                                                                                                                                                                                                                                                                                                                                                                                                                                                                                                                                                                                                                                                                                                                                                                                                                                                                                                                                                                                                                                                                                                                                                                                                                                                                                                                                                                                                                                                                                                                                                                                                                                                                                                                                                                                                                                                                                                                                                                                                                                                                                                                                                                                                                                                                                                                                                                                                                                                                                                                                                                                                                                                                                                                                                                                                                                                                                                                                                                                                                                                                                                                                                                                                                                                                                                                                                                                                                                                                                                                                                                                                                                                                                                                                                                                                                                                                                                                                                                                                                                                                                                                                                                                                                                                                                                                                                                                                                                                                                                                                                                                                                                                    | Israel Central Virology laboratory                                                                                                                                                                                        | Israel Central Virology laboratory                                                                                                                                                                                                                                                                                                                                              | Efrat Dahan Bucris; Ella Mendelson; Michal Mandelboim; Neta Zuckerman; Oran Erster; Orna Mor                                                                                                                                                                                                                                                                                                                                                                                                                                                                                                                         |
| EPI_ISL_804097, EPI_ISL_1240651, EPI_ISL_1763441, EPI_ISL_2084505, EPI_ISL_2084619, EPI_ISL_2085056, EPI_ISL_2085745, EPI_ISL_2182030, EPI_ISL_2182923, EPI_ISL_2183026, EPI_ISL_2183029, EPI_ISL_2183057, EPI_ISL_2183059, EPI_ISL_2183060, EPI_ISL_2183062, EPI_ISL_2183112, EPI_ISL_2183114, EPI_ISL_2183116, EPI_ISL_2183117, EPI_ISL_2183141, EPI_ISL_2183341, EPI_ISL_2183420, EPI_ISL_2183422, EPI_ISL_2183424, EPI_ISL_2183427, EPI_ISL_2183431, EPI_ISL_2183433, EPI_ISL_2183622, EPI_ISL_2183640, EPI_ISL_2183660, EPI_ISL_2183769, EPI_ISL_2183842, EPI_ISL_2183852, EPI_ISL_2636189                                                                                                                                                                                                                                                                                                                                                                                                                                                                                                                                                                                                                                                                                                                                                                                                                                                                                                                                                                                                                                                                                                                                                                                                                                                                                                                                                                                                                                                                                                                                                                                                                                                                                                                                                                                                                                                                                                                                                                                                                                                                                                                                                                                                                                                                                                                                                                                                                                                                                                                                                                                                                                                                                                                                                                                                                                                                                                                                                                                                                                                                                                                                                                                                                                                                                                                                                                                                                                                                                                                                                                                                                                                                                                                                                                                                                                                                                                                                                                                                                                                                                                                                                                                                                                                                                                                                                                                                                                                                                                                                                                                                                                                                                                                                                                                                                                                                                                                                                                                                                                                                                                                                                                      | Israel National Consortium for SARS-CoV-2 sequencing                                                                                                                                                                      | Assaf Rokney; Dana Bar-Ilan; David A. Zeevi; Efrat Dahan Bucris; Efrat Glick-Saar; Efrat Rorman; Ella Mendelson; Ephraim Fass; Eva Nachum; Gal Zizelski Valenci; Gideon Rechavi; Israel Nissan; Joseph Jaffe; Maya Davidovich Cohen; Michal Mandelboim; Miranda Geva; Mor Rubinstein; Neta Zuckerman; Netanel Abu; Omer Murik; Omri Nayshool; Oran Erster; Orna Mor; Tzvia Mann |                                                                                                                                                                                                                                                                                                                                                                                                                                                                                                                                                                                                                      |
| EPI_ISL_778812, EPI_ISL_778814, EPI_ISL_837481, EPI_ISL_1630068, EPI_ISL_1715012, EPI_ISL_1759633, EPI_ISL_1793154, EPI_ISL_2020594, EPI_ISL_2282004, EPI_ISL_2356961, EPI_ISL_2550948, EPI_ISL_2550992, EPI_ISL_2551142                                                                                                                                                                                                                                                                                                                                                                                                                                                                                                                                                                                                                                                                                                                                                                                                                                                                                                                                                                                                                                                                                                                                                                                                                                                                                                                                                                                                                                                                                                                                                                                                                                                                                                                                                                                                                                                                                                                                                                                                                                                                                                                                                                                                                                                                                                                                                                                                                                                                                                                                                                                                                                                                                                                                                                                                                                                                                                                                                                                                                                                                                                                                                                                                                                                                                                                                                                                                                                                                                                                                                                                                                                                                                                                                                                                                                                                                                                                                                                                                                                                                                                                                                                                                                                                                                                                                                                                                                                                                                                                                                                                                                                                                                                                                                                                                                                                                                                                                                                                                                                                                                                                                                                                                                                                                                                                                                                                                                                                                                                                                             | see above                                                                                                                                                                                                                 | TIGEM                                                                                                                                                                                                                                                                                                                                                                           | Andrea Ballabio; Anna Manfredi; Antonio Grimaldi; Antonio Grimaldi Patrizia Annunziata Francesco Panariello Biancamaria Pierri Claudia Tiberio Teresa Giuliano Valentina Bouche Chiara Colantuono Maria Concetta Cuomo Denise Di Concilio Lucio Di Filippo Anna Manfredi Marcello Salvi Antonio Limone Luigi Atripaldi Pellegrino Cerino Andrea Ballabio Davide Cacchiarelli; Antonio Limone; Biancamaria Pierri; Chiara Colantuono; Davide Cacchiarelli; Denise Di Concilio; Francesco Panariello; Lucio Di Filippo; Marcello Salvi; Maria Concetta Cuomo; Patrizia Annunziata; Pellegrino Cerino; Valentina Bouche |
| EPI_ISL_2641780                                                                                                                                                                                                                                                                                                                                                                                                                                                                                                                                                                                                                                                                                                                                                                                                                                                                                                                                                                                                                                                                                                                                                                                                                                                                                                                                                                                                                                                                                                                                                                                                                                                                                                                                                                                                                                                                                                                                                                                                                                                                                                                                                                                                                                                                                                                                                                                                                                                                                                                                                                                                                                                                                                                                                                                                                                                                                                                                                                                                                                                                                                                                                                                                                                                                                                                                                                                                                                                                                                                                                                                                                                                                                                                                                                                                                                                                                                                                                                                                                                                                                                                                                                                                                                                                                                                                                                                                                                                                                                                                                                                                                                                                                                                                                                                                                                                                                                                                                                                                                                                                                                                                                                                                                                                                                                                                                                                                                                                                                                                                                                                                                                                                                                                                                      | Istituto Zooprofilattico Sperimentale del Mezzogiorno                                                                                                                                                                     | Telethon Institute of Genetics and Medicine (TIGEM)                                                                                                                                                                                                                                                                                                                             | Antonio Grimaldi Patrizia Annunziata Francesco Panariello Biancamaria Pierri Claudia Tiberio Teresa Giuliano Valentina Bouche Chiara Colantuono Maria Concetta Cuomo Denise Di Concilio Lucio Di Filippo Anna Manfredi Marcello Salvi Antonio Limone Luigi Atripaldi Pellegrino Cerino Andrea Ballabio Davide Cacchiarelli                                                                                                                                                                                                                                                                                           |
| EPI_ISL_2341995, EPI_ISL_2342032, EPI_ISL_2342037, EPI_ISL_2342053, EPI_ISL_2342071, EPI_ISL_2342081, EPI_ISL_2342084, EPI_ISL_2342090, EPI_ISL_2342094, EPI_ISL_2342101, EPI_ISL_2342106, EPI_ISL_2342116, EPI_ISL_2342119, EPI_ISL_2342124, EPI_ISL_2342126, EPI_ISL_2342355                                                                                                                                                                                                                                                                                                                                                                                                                                                                                                                                                                                                                                                                                                                                                                                                                                                                                                                                                                                                                                                                                                                                                                                                                                                                                                                                                                                                                                                                                                                                                                                                                                                                                                                                                                                                                                                                                                                                                                                                                                                                                                                                                                                                                                                                                                                                                                                                                                                                                                                                                                                                                                                                                                                                                                                                                                                                                                                                                                                                                                                                                                                                                                                                                                                                                                                                                                                                                                                                                                                                                                                                                                                                                                                                                                                                                                                                                                                                                                                                                                                                                                                                                                                                                                                                                                                                                                                                                                                                                                                                                                                                                                                                                                                                                                                                                                                                                                                                                                                                                                                                                                                                                                                                                                                                                                                                                                                                                                                                                       | see above                                                                                                                                                                                                                 | Institute of Life Sciences - INSACOG                                                                                                                                                                                                                                                                                                                                            | Ajay Parida; Amol M. Kanampalliwar; Arup Ghosh; Atimukta Jha; INSACOG Consortium; Omprakash Shiriwasi; Punit Prasad; Rajeeb Swain; Rupesh Dash; Safal Walia; Sana Fatma; Shifu Aggarwal; Sunil K. Raghav                                                                                                                                                                                                                                                                                                                                                                                                             |
| EPI_ISL_2723817,<br>EPI_ISL_2723818,<br>EPI_ISL_2723819,<br>EPI_ISL_2723820                                                                                                                                                                                                                                                                                                                                                                                                                                                                                                                                                                                                                                                                                                                                                                                                                                                                                                                                                                                                                                                                                                                                                                                                                                                                                                                                                                                                                                                                                                                                                                                                                                                                                                                                                                                                                                                                                                                                                                                                                                                                                                                                                                                                                                                                                                                                                                                                                                                                                                                                                                                                                                                                                                                                                                                                                                                                                                                                                                                                                                                                                                                                                                                                                                                                                                                                                                                                                                                                                                                                                                                                                                                                                                                                                                                                                                                                                                                                                                                                                                                                                                                                                                                                                                                                                                                                                                                                                                                                                                                                                                                                                                                                                                                                                                                                                                                                                                                                                                                                                                                                                                                                                                                                                                                                                                                                                                                                                                                                                                                                                                                                                                                                                          | JIPIER Asia / India / Puducherry / Puducherry                                                                                                                                                                             | inStem NCBS - INSACOG                                                                                                                                                                                                                                                                                                                                                           | Uma Ramakrishnan Dasaradhi Palakodeti Aswin SaiNarain                                                                                                                                                                                                                                                                                                                                                                                                                                                                                                                                                                |
| EPI_ISL_1939929, EPI_ISL_1939930, EPI_ISL_1939931, EPI_ISL_1939932, EPI_ISL_1939934, EPI_ISL_1939936, EPI_ISL_1939939, EPI_ISL_1939940, EPI_ISL_1939947, EPI_ISL_1939950, EPI_ISL_1939951, EPI_ISL_1939952, EPI_ISL_1939955, EPI_ISL_1939956, EPI_ISL_1939957, EPI_ISL_1939958, EPI_ISL_1939959, EPI_ISL_1939961, EPI_ISL_1939962, EPI_ISL_1939963, EPI_ISL_1939964, EPI_ISL_1939966, EPI_ISL_2272789, EPI_ISL_2272790, EPI_ISL_2272791, EPI_ISL_2272794, EPI_ISL_2272795, EPI_ISL_2272796, EPI_ISL_2272801, EPI_ISL_2272802, EPI_ISL_2272803, EPI_ISL_2272812, EPI_ISL_2272813, EPI_ISL_2272814, EPI_ISL_2272815, EPI_ISL_2272816, EPI_ISL_2272817, EPI_ISL_2272818, EPI_ISL_2272819, EPI_ISL_2272820, EPI_ISL_2272821, EPI_ISL_2272822, EPI_ISL_2272823, EPI_ISL_2272824, EPI_ISL_2272825, EPI_ISL_2272826, EPI_ISL_2272827, EPI_ISL_2272828, EPI_ISL_2272829, EPI_ISL_2272830, EPI_ISL_2272831, EPI_ISL_2272832, EPI_ISL_2272833, EPI_ISL_2272834, EPI_ISL_2272835, EPI_ISL_2272836, EPI_ISL_2272837, EPI_ISL_2272838, EPI_ISL_2272839, EPI_ISL_2272840, EPI_ISL_2272841, EPI_ISL_2272842, EPI_ISL_2272843, EPI_ISL_2272844, EPI_ISL_2272845, EPI_ISL_2272846, EPI_ISL_2272847, EPI_ISL_2272848, EPI_ISL_2272849, EPI_ISL_2272850, EPI_ISL_2272851, EPI_ISL_2272852, EPI_ISL_2272853, EPI_ISL_2272854, EPI_ISL_2272855, EPI_ISL_2272856, EPI_ISL_2272857, EPI_ISL_2272858, EPI_ISL_2272859, EPI_ISL_2272860, EPI_ISL_2272861, EPI_ISL_2272862, EPI_ISL_2272863, EPI_ISL_2272864, EPI_ISL_2272865, EPI_ISL_2272866, EPI_ISL_2272867, EPI_ISL_2272868, EPI_ISL_2272869, EPI_ISL_2272870, EPI_ISL_2272871, EPI_ISL_2272872, EPI_ISL_2272873, EPI_ISL_2272874, EPI_ISL_2272875, EPI_ISL_2272876, EPI_ISL_2272877, EPI_ISL_2272878, EPI_ISL_2272879, EPI_ISL_2272880, EPI_ISL_2272881, EPI_ISL_2272882, EPI_ISL_2272883, EPI_ISL_2272884, EPI_ISL_2272885, EPI_ISL_2272886, EPI_ISL_2272887, EPI_ISL_2272888, EPI_ISL_2272889, EPI_ISL_2272890, EPI_ISL_2272891, EPI_ISL_2272892, EPI_ISL_2272893, EPI_ISL_2272894, EPI_ISL_2272895, EPI_ISL_2272896, EPI_ISL_2272897, EPI_ISL_2272898, EPI_ISL_2272899, EPI_ISL_2272900, EPI_ISL_2272901, EPI_ISL_2272902, EPI_ISL_2272903, EPI_ISL_2272904, EPI_ISL_2272905, EPI_ISL_2272906, EPI_ISL_2272907, EPI_ISL_2272908, EPI_ISL_2272909, EPI_ISL_2272910, EPI_ISL_2272911, EPI_ISL_2272912, EPI_ISL_2272913, EPI_ISL_2272914, EPI_ISL_2272915, EPI_ISL_2272916, EPI_ISL_2272917, EPI_ISL_2272918, EPI_ISL_2272919, EPI_ISL_2272920, EPI_ISL_2272921, EPI_ISL_2272922, EPI_ISL_2272923, EPI_ISL_2272924, EPI_ISL_2272925, EPI_ISL_2272926, EPI_ISL_2272927, EPI_ISL_2272928, EPI_ISL_2272929, EPI_ISL_2272930, EPI_ISL_2272931, EPI_ISL_2272932, EPI_ISL_2272933, EPI_ISL_2272934, EPI_ISL_2272935                                                                                                                                                                                                                                                                                                                                                                                                                                                                                                                                                                                                                                                                                                                                                                                                                                                                                                                                                                                                                                                                                                                                                                                                                                                                                                                                                                                                                                                                                                                                                                                                                                                                                                                                                                                                                                                                                                                                                                                                                                                                                                                                                                                                                                                                                                                                                                                                                                                                                                                                                                                                                                                                                                                                                                                                                                                                                                                                                                                                                            | see above                                                                                                                                                                                                                 | inStem NCBS - INSACOG                                                                                                                                                                                                                                                                                                                                                           | Uma Ramakrishnan Dasaradhi Palakodeti Aswin SaiNarain                                                                                                                                                                                                                                                                                                                                                                                                                                                                                                                                                                |
| EPI_ISL_2450333                                                                                                                                                                                                                                                                                                                                                                                                                                                                                                                                                                                                                                                                                                                                                                                                                                                                                                                                                                                                                                                                                                                                                                                                                                                                                                                                                                                                                                                                                                                                                                                                                                                                                                                                                                                                                                                                                                                                                                                                                                                                                                                                                                                                                                                                                                                                                                                                                                                                                                                                                                                                                                                                                                                                                                                                                                                                                                                                                                                                                                                                                                                                                                                                                                                                                                                                                                                                                                                                                                                                                                                                                                                                                                                                                                                                                                                                                                                                                                                                                                                                                                                                                                                                                                                                                                                                                                                                                                                                                                                                                                                                                                                                                                                                                                                                                                                                                                                                                                                                                                                                                                                                                                                                                                                                                                                                                                                                                                                                                                                                                                                                                                                                                                                                                      | JIJR NAGAR UPHC                                                                                                                                                                                                           | INSACOG-KA, NIMHANS                                                                                                                                                                                                                                                                                                                                                             | Ananthapadmanabha Kotambail; Anita S Desai; Anson Kunjumon George; Chetan G K; Chitra Pattabiraman; Darshan Sreenivas; Gautham Arunachal Udupi; V Ravi                                                                                                                                                                                                                                                                                                                                                                                                                                                               |
| EPI_ISL_1753676, EPI_ISL_1922480, EPI_ISL_2007204, EPI_ISL_2422370, EPI_ISL_2422371, EPI_ISL_2422399, EPI_ISL_2462998, EPI_ISL_2491217, EPI_ISL_2601980, EPI_ISL_2646318, EPI_ISL_2675263, EPI_ISL_2774142, EPI_ISL_2774143                                                                                                                                                                                                                                                                                                                                                                                                                                                                                                                                                                                                                                                                                                                                                                                                                                                                                                                                                                                                                                                                                                                                                                                                                                                                                                                                                                                                                                                                                                                                                                                                                                                                                                                                                                                                                                                                                                                                                                                                                                                                                                                                                                                                                                                                                                                                                                                                                                                                                                                                                                                                                                                                                                                                                                                                                                                                                                                                                                                                                                                                                                                                                                                                                                                                                                                                                                                                                                                                                                                                                                                                                                                                                                                                                                                                                                                                                                                                                                                                                                                                                                                                                                                                                                                                                                                                                                                                                                                                                                                                                                                                                                                                                                                                                                                                                                                                                                                                                                                                                                                                                                                                                                                                                                                                                                                                                                                                                                                                                                                                          | see above                                                                                                                                                                                                                 | Jessa                                                                                                                                                                                                                                                                                                                                                                           | Berden et al. on behalf of Jessa_cmdLab; Berden et al. on behalf of the Jessa_cmdLab; Cruys et al. on behalf of the Jessa_cmdLab; Marijke Raymaekers et al. on behalf of the Jessa_cmdLab; Severine Berden et al. on behalf of the Jessa_cmdLab                                                                                                                                                                                                                                                                                                                                                                      |
| EPI_ISL_1939969,<br>EPI_ISL_1939970                                                                                                                                                                                                                                                                                                                                                                                                                                                                                                                                                                                                                                                                                                                                                                                                                                                                                                                                                                                                                                                                                                                                                                                                                                                                                                                                                                                                                                                                                                                                                                                                                                                                                                                                                                                                                                                                                                                                                                                                                                                                                                                                                                                                                                                                                                                                                                                                                                                                                                                                                                                                                                                                                                                                                                                                                                                                                                                                                                                                                                                                                                                                                                                                                                                                                                                                                                                                                                                                                                                                                                                                                                                                                                                                                                                                                                                                                                                                                                                                                                                                                                                                                                                                                                                                                                                                                                                                                                                                                                                                                                                                                                                                                                                                                                                                                                                                                                                                                                                                                                                                                                                                                                                                                                                                                                                                                                                                                                                                                                                                                                                                                                                                                                                                  | KAMAKSHIPALYA                                                                                                                                                                                                             | inStem NCBS - INSACOG                                                                                                                                                                                                                                                                                                                                                           | Uma Ramakrishnan Dasaradhi Palakodeti Aswin SaiNarain                                                                                                                                                                                                                                                                                                                                                                                                                                                                                                                                                                |
| EPI_ISL_1818617,<br>EPI_ISL_1818618,<br>EPI_ISL_2545211                                                                                                                                                                                                                                                                                                                                                                                                                                                                                                                                                                                                                                                                                                                                                                                                                                                                                                                                                                                                                                                                                                                                                                                                                                                                                                                                                                                                                                                                                                                                                                                                                                                                                                                                                                                                                                                                                                                                                                                                                                                                                                                                                                                                                                                                                                                                                                                                                                                                                                                                                                                                                                                                                                                                                                                                                                                                                                                                                                                                                                                                                                                                                                                                                                                                                                                                                                                                                                                                                                                                                                                                                                                                                                                                                                                                                                                                                                                                                                                                                                                                                                                                                                                                                                                                                                                                                                                                                                                                                                                                                                                                                                                                                                                                                                                                                                                                                                                                                                                                                                                                                                                                                                                                                                                                                                                                                                                                                                                                                                                                                                                                                                                                                                              | KEMPEGOWDA INTERNATIONAL AIRPORT                                                                                                                                                                                          | INSACOG-KA, NIMHANS                                                                                                                                                                                                                                                                                                                                                             | Ananthapadmanabha Kotambail; Anita S Desai; Anson Kunjumon George; Chetan G K; Chitra Pattabiraman; Darshan Sreenivas; Gautham Arunachal Udupi; Pramada Prasad; V Ravi                                                                                                                                                                                                                                                                                                                                                                                                                                               |
| EPI_ISL_1610621,<br>EPI_ISL_1610632,<br>EPI_ISL_2602970                                                                                                                                                                                                                                                                                                                                                                                                                                                                                                                                                                                                                                                                                                                                                                                                                                                                                                                                                                                                                                                                                                                                                                                                                                                                                                                                                                                                                                                                                                                                                                                                                                                                                                                                                                                                                                                                                                                                                                                                                                                                                                                                                                                                                                                                                                                                                                                                                                                                                                                                                                                                                                                                                                                                                                                                                                                                                                                                                                                                                                                                                                                                                                                                                                                                                                                                                                                                                                                                                                                                                                                                                                                                                                                                                                                                                                                                                                                                                                                                                                                                                                                                                                                                                                                                                                                                                                                                                                                                                                                                                                                                                                                                                                                                                                                                                                                                                                                                                                                                                                                                                                                                                                                                                                                                                                                                                                                                                                                                                                                                                                                                                                                                                                              | KEMRI Center for Biotechnology Research and Development                                                                                                                                                                   | KEMRI-Wellcome Trust Research Programme,Kilifi                                                                                                                                                                                                                                                                                                                                  | : Githinji G.; Matoke D.; Mburu M.W.; Mohamed K.S.; Onyango C.; Thiongo K.; de Laurent Z.                                                                                                                                                                                                                                                                                                                                                                                                                                                                                                                            |
| EPI_ISL_2602898                                                                                                                                                                                                                                                                                                                                                                                                                                                                                                                                                                                                                                                                                                                                                                                                                                                                                                                                                                                                                                                                                                                                                                                                                                                                                                                                                                                                                                                                                                                                                                                                                                                                                                                                                                                                                                                                                                                                                                                                                                                                                                                                                                                                                                                                                                                                                                                                                                                                                                                                                                                                                                                                                                                                                                                                                                                                                                                                                                                                                                                                                                                                                                                                                                                                                                                                                                                                                                                                                                                                                                                                                                                                                                                                                                                                                                                                                                                                                                                                                                                                                                                                                                                                                                                                                                                                                                                                                                                                                                                                                                                                                                                                                                                                                                                                                                                                                                                                                                                                                                                                                                                                                                                                                                                                                                                                                                                                                                                                                                                                                                                                                                                                                                                                                      | KEMRI-CGHR                                                                                                                                                                                                                | KEMRI-Wellcome Trust Research Programme,Kilifi                                                                                                                                                                                                                                                                                                                                  | : Githinji G.; Matoke D.; Mburu M.W.; Mohamed K.S.; Onyango C.; de Laurent Z.                                                                                                                                                                                                                                                                                                                                                                                                                                                                                                                                        |
| EPI_ISL_1440102, EPI_ISL_1440118, EPI_ISL_1440125, EPI_ISL_1610516, EPI_ISL_2602464, EPI_ISL_2602474, EPI_ISL_2602494, EPI_ISL_2602500, EPI_ISL_2602574, EPI_ISL_2602576, EPI_ISL_2602583, EPI_ISL_2602588, EPI_ISL_2602618, EPI_ISL_2602705, EPI_ISL_2602762, EPI_ISL_2602763, EPI_ISL_2603006, EPI_ISL_2603015, EPI_ISL_2603023, EPI_ISL_2603038, EPI_ISL_2603039, EPI_ISL_2603040, EPI_ISL_2603044, EPI_ISL_2603049, EPI_ISL_2603051, EPI_ISL_2603052, EPI_ISL_2603053, EPI_ISL_2603056, EPI_ISL_2603057, EPI_ISL_2603059                                                                                                                                                                                                                                                                                                                                                                                                                                                                                                                                                                                                                                                                                                                                                                                                                                                                                                                                                                                                                                                                                                                                                                                                                                                                                                                                                                                                                                                                                                                                                                                                                                                                                                                                                                                                                                                                                                                                                                                                                                                                                                                                                                                                                                                                                                                                                                                                                                                                                                                                                                                                                                                                                                                                                                                                                                                                                                                                                                                                                                                                                                                                                                                                                                                                                                                                                                                                                                                                                                                                                                                                                                                                                                                                                                                                                                                                                                                                                                                                                                                                                                                                                                                                                                                                                                                                                                                                                                                                                                                                                                                                                                                                                                                                                                                                                                                                                                                                                                                                                                                                                                                                                                                                                                         | see above                                                                                                                                                                                                                 | KEMRI-Wellcome Trust Research Programme,Kilifi                                                                                                                                                                                                                                                                                                                                  | : Githinji G.; Matoke D.; Mburu M.W.; Mohamed K.S.; Onyango C.; Thiongo K.; de Laurent Z.; deLaurent Z.                                                                                                                                                                                                                                                                                                                                                                                                                                                                                                              |
| EPI_ISL_855537,<br>EPI_ISL_1039227                                                                                                                                                                                                                                                                                                                                                                                                                                                                                                                                                                                                                                                                                                                                                                                                                                                                                                                                                                                                                                                                                                                                                                                                                                                                                                                                                                                                                                                                                                                                                                                                                                                                                                                                                                                                                                                                                                                                                                                                                                                                                                                                                                                                                                                                                                                                                                                                                                                                                                                                                                                                                                                                                                                                                                                                                                                                                                                                                                                                                                                                                                                                                                                                                                                                                                                                                                                                                                                                                                                                                                                                                                                                                                                                                                                                                                                                                                                                                                                                                                                                                                                                                                                                                                                                                                                                                                                                                                                                                                                                                                                                                                                                                                                                                                                                                                                                                                                                                                                                                                                                                                                                                                                                                                                                                                                                                                                                                                                                                                                                                                                                                                                                                                                                   | KEMRI-Wellcome Trust Research Programme,KEMRI-CGMR-C Kilifi                                                                                                                                                               | KEMRI-Wellcome Trust Research Programme,KEMRI-CGMR-C Kilifi                                                                                                                                                                                                                                                                                                                     | Githinji et al                                                                                                                                                                                                                                                                                                                                                                                                                                                                                                                                                                                                       |
| EPI_ISL_1091296, EPI_ISL_1093306, EPI_ISL_1312211, EPI_ISL_2424439, EPI_ISL_2424440, EPI_ISL_2424441, EPI_ISL_2424442, EPI_ISL_2424443, EPI_ISL_2424444, EPI_ISL_2425097, EPI_ISL_2425122, EPI_ISL_2425254, EPI_ISL_2425255, EPI_ISL_2425256, EPI_ISL_2425257, EPI_ISL_2425258, EPI_ISL_2425316, EPI_ISL_2425317, EPI_ISL_2425320, EPI_ISL_2425321, EPI_ISL_2425322, EPI_ISL_2425323, EPI_ISL_2425324, EPI_ISL_2425325, EPI_ISL_2425326, EPI_ISL_2425327, EPI_ISL_2425328, EPI_ISL_2425329, EPI_ISL_2425330, EPI_ISL_2425331, EPI_ISL_2425332, EPI_ISL_2425333, EPI_ISL_2425334, EPI_ISL_2425335, EPI_ISL_2425336, EPI_ISL_2425337, EPI_ISL_2425338, EPI_ISL_2425339, EPI_ISL_2425340, EPI_ISL_2425341, EPI_ISL_2425342, EPI_ISL_2425343, EPI_ISL_2425344, EPI_ISL_2425345, EPI_ISL_2425346, EPI_ISL_2425347, EPI_ISL_2425348, EPI_ISL_2425349, EPI_ISL_2425350, EPI_ISL_2425351, EPI_ISL_2425352, EPI_ISL_2425353, EPI_ISL_2425354, EPI_ISL_2425355, EPI_ISL_2425356, EPI_ISL_2425357, EPI_ISL_2425358, EPI_ISL_2425359, EPI_ISL_2425360, EPI_ISL_2425361, EPI_ISL_2425362, EPI_ISL_2425363, EPI_ISL_2425364, EPI_ISL_2425365, EPI_ISL_2425366, EPI_ISL_2425367, EPI_ISL_2425368, EPI_ISL_2425369, EPI_ISL_2425370, EPI_ISL_2425371, EPI_ISL_2425372, EPI_ISL_2425373, EPI_ISL_2425374, EPI_ISL_2425375, EPI_ISL_2425376, EPI_ISL_2425377, EPI_ISL_2425378, EPI_ISL_2425379, EPI_ISL_2425380, EPI_ISL_2425381, EPI_ISL_2425382, EPI_ISL_2425383, EPI_ISL_2425384, EPI_ISL_2425385, EPI_ISL_2425386, EPI_ISL_2425387, EPI_ISL_2425388, EPI_ISL_2425389, EPI_ISL_2425390, EPI_ISL_2425391, EPI_ISL_2425392, EPI_ISL_2425393, EPI_ISL_2425394, EPI_ISL_2425395, EPI_ISL_2425396, EPI_ISL_2425397, EPI_ISL_2425398, EPI_ISL_2425399, EPI_ISL_2425400, EPI_ISL_2425401, EPI_ISL_2425402, EPI_ISL_2425403, EPI_ISL_2425404, EPI_ISL_2425405, EPI_ISL_2425406, EPI_ISL_2425407, EPI_ISL_2425408, EPI_ISL_2425409, EPI_ISL_2425410, EPI_ISL_2425411, EPI_ISL_2425412, EPI_ISL_2425413, EPI_ISL_2425414, EPI_ISL_2425415, EPI_ISL_2425416, EPI_ISL_2425417, EPI_ISL_2425418, EPI_ISL_2425419, EPI_ISL_2425420, EPI_ISL_2425421, EPI_ISL_2425422, EPI_ISL_2425423, EPI_ISL_2425424, EPI_ISL_2425425, EPI_ISL_2425426, EPI_ISL_2425427, EPI_ISL_2425428, EPI_ISL_2425429, EPI_ISL_2425430, EPI_ISL_2425431, EPI_ISL_2425432, EPI_ISL_2425433, EPI_ISL_2425434, EPI_ISL_2425435, EPI_ISL_2425436, EPI_ISL_2425437, EPI_ISL_2425438, EPI_ISL_2425439, EPI_ISL_2425440, EPI_ISL_2425441, EPI_ISL_2425442, EPI_ISL_2425443, EPI_ISL_2425444, EPI_ISL_2425445, EPI_ISL_2425446, EPI_ISL_2425447, EPI_ISL_2425448, EPI_ISL_2425449, EPI_ISL_2425450, EPI_ISL_2425451, EPI_ISL_2425452, EPI_ISL_2425453, EPI_ISL_2425454, EPI_ISL_2425455, EPI_ISL_2425456, EPI_ISL_2425457, EPI_ISL_2425458, EPI_ISL_2425459, EPI_ISL_2425460, EPI_ISL_2425461, EPI_ISL_2425462, EPI_ISL_2425463, EPI_ISL_2425464, EPI_ISL_2425465, EPI_ISL_2425466, EPI_ISL_2425467, EPI_ISL_2425468, EPI_ISL_2425469, EPI_ISL_2425470, EPI_ISL_2425471, EPI_ISL_2425472, EPI_ISL_2425473, EPI_ISL_2425474, EPI_ISL_2425475, EPI_ISL_2425476, EPI_ISL_2425477, EPI_ISL_2425478, EPI_ISL_2425479, EPI_ISL_2425480, EPI_ISL_2425481, EPI_ISL_2425482, EPI_ISL_2425483, EPI_ISL_2425484, EPI_ISL_2425485, EPI_ISL_2425486, EPI_ISL_2425487, EPI_ISL_2425488, EPI_ISL_2425489, EPI_ISL_2425490, EPI_ISL_2425491, EPI_ISL_2425492, EPI_ISL_2425493, EPI_ISL_2425494, EPI_ISL_2425495, EPI_ISL_2425496, EPI_ISL_2425497, EPI_ISL_2425498, EPI_ISL_2425499, EPI_ISL_2425500, EPI_ISL_2425501, EPI_ISL_2425502, EPI_ISL_2425503, EPI_ISL_2425504, EPI_ISL_2425505, EPI_ISL_2425506, EPI_ISL_2425507, EPI_ISL_2425508, EPI_ISL_2425509, EPI_ISL_2425510, EPI_ISL_2425511, EPI_ISL_2425512, EPI_ISL_2425513, EPI_ISL_2425514, EPI_ISL_2425515, EPI_ISL_2425516, EPI_ISL_2425517, EPI_ISL_2425518, EPI_ISL_2425519, EPI_ISL_2425520, EPI_ISL_2425521, EPI_ISL_2425522, EPI_ISL_2425523, EPI_ISL_2425524, EPI_ISL_2425525, EPI_ISL_2425526, EPI_ISL_2425527, EPI_ISL_2425528, EPI_ISL_2425529, EPI_ISL_2425530, EPI_ISL_2425531, EPI_ISL_2425532, EPI_ISL_2425533, EPI_ISL_2425534, EPI_ISL_2425535, EPI_ISL_2425536, EPI_ISL_2425537, EPI_ISL_2425538, EPI_ISL_2425539, EPI_ISL_2425540, EPI_ISL_2425541, EPI_ISL_2425542, EPI_ISL_2425543, EPI_ISL_2425544, EPI_ISL_2425545, EPI_ISL_2425546, EPI_ISL_2425547, EPI_ISL_2425548, EPI_ISL_2425549, EPI_ISL_2425550, EPI_ISL_2425551, EPI_ISL_2425552, EPI_ISL_2425553, EPI_ISL_2425554, EPI_ISL_2425555, EPI_ISL_2425556, EPI_ISL_2425557, EPI_ISL_2425558, EPI_ISL_2425559, EPI_ISL_2425560, EPI_ISL_2425561, EPI_ISL_2425562, EPI_ISL_2425563, EPI_ISL_2425564, EPI_ISL_2425565, EPI_ISL_2425566, EPI_ISL_2425567, EPI_ISL_2425568, EPI_ISL_2425569, EPI_ISL_2425570, EPI_ISL_2425571, EPI_ISL_2425572, EPI_ISL_2425573, EPI_ISL_2425574, EPI_ISL_2425575, EPI_ISL_2425576, EPI_ISL_2425577, EPI_ISL_2425578, EPI_ISL_2425579, EPI_ISL_2425580, EPI_ISL_2425581, EPI_ISL_2425582, EPI_ISL_2425583, EPI_ISL_2425584, EPI_ISL_2425585, EPI_ISL_2425586, EPI_ISL_2425587, EPI_ISL_2425588, EPI_ISL_2425589, EPI_ISL_2425590, EPI_ISL_2425591, EPI_ISL_2425592, EPI_ISL_2425593, EPI_ISL_2425594, EPI_ISL_2425595, EPI_ISL_2425596, EPI_ISL_2425597, EPI_ISL_2425598, EPI_ISL_2425599, EPI_ISL_2425600, EPI_ISL_2425601, EPI_ISL_2425602, EPI_ISL_2425603, EPI_ISL_2425604, EPI_ISL_2425605, EPI_ISL_2425606, EPI_ISL_2425607, EPI_ISL_2425608, EPI_ISL_2425609, EPI_ISL_2425610, EPI_ISL_2425611, EPI_ISL_2425612, EPI_ISL_2425613, EPI_ISL_2425614, EPI_ISL_2425615, EPI_ISL_2425616, EPI_ISL_2425617, EPI_ISL_2425618, EPI_ISL_2425619, EPI_ISL_2425620, EPI_ISL_2425621, EPI_ISL_2425622, EPI_ISL_2425623, EPI_ISL_2425624, EPI_ISL_2425625, EPI_ISL_2425626, EPI_ISL_2425627 | see above                                                                                                                                                                                                                 | KU Leuven, Rega Institute, Clinical and Epidemiological Virology                                                                                                                                                                                                                                                                                                                | Bert Vanmechelen; Joan Marti-Carreras; Piet Maes; Tony Wawina-Bokalanga                                                                                                                                                                                                                                                                                                                                                                                                                                                                                                                                              |
| EPI_ISL_2544687                                                                                                                                                                                                                                                                                                                                                                                                                                                                                                                                                                                                                                                                                                                                                                                                                                                                                                                                                                                                                                                                                                                                                                                                                                                                                                                                                                                                                                                                                                                                                                                                                                                                                                                                                                                                                                                                                                                                                                                                                                                                                                                                                                                                                                                                                                                                                                                                                                                                                                                                                                                                                                                                                                                                                                                                                                                                                                                                                                                                                                                                                                                                                                                                                                                                                                                                                                                                                                                                                                                                                                                                                                                                                                                                                                                                                                                                                                                                                                                                                                                                                                                                                                                                                                                                                                                                                                                                                                                                                                                                                                                                                                                                                                                                                                                                                                                                                                                                                                                                                                                                                                                                                                                                                                                                                                                                                                                                                                                                                                                                                                                                                                                                                                                                                      | Kanagawa Prefectural Institute of Public Health                                                                                                                                                                           | Kanagawa Prefectural Institute of Public Health                                                                                                                                                                                                                                                                                                                                 | Itsumi Toyokura; Junichi Sakuragi; Kentaro Itokawa; Makiko Kondo; Makoto Kuroda; Masanori Hashino; Rieko Suzuki; Rina Tanaka; Sumi Watanabe; Takako Sano; Takayuki Hishiki; Tomohiko Takasaki; Tsuyoshi Sekizuka                                                                                                                                                                                                                                                                                                                                                                                                     |
| EPI_ISL_2233091, EPI_ISL_2233092, EPI_ISL_2233093, EPI_ISL_2233096, EPI_ISL_2233097, EPI_ISL_2233098, EPI_ISL_2233101, EPI_ISL_2233103, EPI_ISL_2233105                                                                                                                                                                                                                                                                                                                                                                                                                                                                                                                                                                                                                                                                                                                                                                                                                                                                                                                                                                                                                                                                                                                                                                                                                                                                                                                                                                                                                                                                                                                                                                                                                                                                                                                                                                                                                                                                                                                                                                                                                                                                                                                                                                                                                                                                                                                                                                                                                                                                                                                                                                                                                                                                                                                                                                                                                                                                                                                                                                                                                                                                                                                                                                                                                                                                                                                                                                                                                                                                                                                                                                                                                                                                                                                                                                                                                                                                                                                                                                                                                                                                                                                                                                                                                                                                                                                                                                                                                                                                                                                                                                                                                                                                                                                                                                                                                                                                                                                                                                                                                                                                                                                                                                                                                                                                                                                                                                                                                                                                                                                                                                                                              | see above                                                                                                                                                                                                                 | National Institute of Health Research and Development                                                                                                                                                                                                                                                                                                                           | Arie Ardiansyah Nugraha; Hanna Apasari Pawestri; Hartanti Dian Ikawati; Kartika Dewi Puspa; Krisna Pangesti; Nelly Puspandari; Subangiti; Triyani Soekaros; Vivi Setiawaty                                                                                                                                                                                                                                                                                                                                                                                                                                           |
| EPI_ISL_2365534                                                                                                                                                                                                                                                                                                                                                                                                                                                                                                                                                                                                                                                                                                                                                                                                                                                                                                                                                                                                                                                                                                                                                                                                                                                                                                                                                                                                                                                                                                                                                                                                                                                                                                                                                                                                                                                                                                                                                                                                                                                                                                                                                                                                                                                                                                                                                                                                                                                                                                                                                                                                                                                                                                                                                                                                                                                                                                                                                                                                                                                                                                                                                                                                                                                                                                                                                                                                                                                                                                                                                                                                                                                                                                                                                                                                                                                                                                                                                                                                                                                                                                                                                                                                                                                                                                                                                                                                                                                                                                                                                                                                                                                                                                                                                                                                                                                                                                                                                                                                                                                                                                                                                                                                                                                                                                                                                                                                                                                                                                                                                                                                                                                                                                                                                      | Kariminejad-Najmabadi Pathology & Genetics Center, Tehran, Iran                                                                                                                                                           | Genetics Research Center, University of Social Welfare and Rehabilitation Sciences                                                                                                                                                                                                                                                                                              | Hosseini Najmabadi.; Kimia Kahrizi; Mahdieh Koshki; Maryam Azad; Marzieh Mohseni; Siavash Ghaderi; Zohreh Fattahi                                                                                                                                                                                                                                                                                                                                                                                                                                                                                                    |
| EPI_ISL_833500                                                                                                                                                                                                                                                                                                                                                                                                                                                                                                                                                                                                                                                                                                                                                                                                                                                                                                                                                                                                                                                                                                                                                                                                                                                                                                                                                                                                                                                                                                                                                                                                                                                                                                                                                                                                                                                                                                                                                                                                                                                                                                                                                                                                                                                                                                                                                                                                                                                                                                                                                                                                                                                                                                                                                                                                                                                                                                                                                                                                                                                                                                                                                                                                                                                                                                                                                                                                                                                                                                                                                                                                                                                                                                                                                                                                                                                                                                                                                                                                                                                                                                                                                                                                                                                                                                                                                                                                                                                                                                                                                                                                                                                                                                                                                                                                                                                                                                                                                                                                                                                                                                                                                                                                                                                                                                                                                                                                                                                                                                                                                                                                                                                                                                                                                       | Klinik Apotek Dein, Jakarta, Indonesia                                                                                                                                                                                    | Biosafety Level-3 Laboratory, Indonesian Institute of Sciences (LIPI)                                                                                                                                                                                                                                                                                                           | Ade Andriani; Ahmad Fathoni; Andri Wardiana; Anggia Prasetyoputri; Anik Budhi Dharmayanthi; Isa Nuryana; Ratih Asmana Ningrum; Syam Budi Iryanto                                                                                                                                                                                                                                                                                                                                                                                                                                                                     |
| EPI_ISL_2232706                                                                                                                                                                                                                                                                                                                                                                                                                                                                                                                                                                                                                                                                                                                                                                                                                                                                                                                                                                                                                                                                                                                                                                                                                                                                                                                                                                                                                                                                                                                                                                                                                                                                                                                                                                                                                                                                                                                                                                                                                                                                                                                                                                                                                                                                                                                                                                                                                                                                                                                                                                                                                                                                                                                                                                                                                                                                                                                                                                                                                                                                                                                                                                                                                                                                                                                                                                                                                                                                                                                                                                                                                                                                                                                                                                                                                                                                                                                                                                                                                                                                                                                                                                                                                                                                                                                                                                                                                                                                                                                                                                                                                                                                                                                                                                                                                                                                                                                                                                                                                                                                                                                                                                                                                                                                                                                                                                                                                                                                                                                                                                                                                                                                                                                                                      | Klinikum Wels-Grieskirchen                                                                                                                                                                                                | Berghthaler laboratory, CeMM Research Center for Molecular Medicine of the Austrian Academy of Sciences                                                                                                                                                                                                                                                                         | Andreas Berghthaler; Anna Schedl; Bekir Erguner; Benedikt Agerer; Christoph Bock; Fabian Amman; Jan Laine; Lukas Endler; Maelle Le Moing; Martin Senekowitsch; Michael Schuster; Petr Triska; Thomas Penz                                                                                                                                                                                                                                                                                                                                                                                                            |
| EPI_ISL_2397179,<br>EPI_ISL_2397185,<br>EPI_ISL_2397200,<br>EPI_ISL_2612043                                                                                                                                                                                                                                                                                                                                                                                                                                                                                                                                                                                                                                                                                                                                                                                                                                                                                                                                                                                                                                                                                                                                                                                                                                                                                                                                                                                                                                                                                                                                                                                                                                                                                                                                                                                                                                                                                                                                                                                                                                                                                                                                                                                                                                                                                                                                                                                                                                                                                                                                                                                                                                                                                                                                                                                                                                                                                                                                                                                                                                                                                                                                                                                                                                                                                                                                                                                                                                                                                                                                                                                                                                                                                                                                                                                                                                                                                                                                                                                                                                                                                                                                                                                                                                                                                                                                                                                                                                                                                                                                                                                                                                                                                                                                                                                                                                                                                                                                                                                                                                                                                                                                                                                                                                                                                                                                                                                                                                                                                                                                                                                                                                                                                          | Klinisch Laboratorium ZNA                                                                                                                                                                                                 | Klinisch Laboratorium ZNA                                                                                                                                                                                                                                                                                                                                                       | Verstrepen et al.                                                                                                                                                                                                                                                                                                                                                                                                                                                                                                                                                                                                    |
| EPI_ISL_1398369                                                                                                                                                                                                                                                                                                                                                                                                                                                                                                                                                                                                                                                                                                                                                                                                                                                                                                                                                                                                                                                                                                                                                                                                                                                                                                                                                                                                                                                                                                                                                                                                                                                                                                                                                                                                                                                                                                                                                                                                                                                                                                                                                                                                                                                                                                                                                                                                                                                                                                                                                                                                                                                                                                                                                                                                                                                                                                                                                                                                                                                                                                                                                                                                                                                                                                                                                                                                                                                                                                                                                                                                                                                                                                                                                                                                                                                                                                                                                                                                                                                                                                                                                                                                                                                                                                                                                                                                                                                                                                                                                                                                                                                                                                                                                                                                                                                                                                                                                                                                                                                                                                                                                                                                                                                                                                                                                                                                                                                                                                                                                                                                                                                                                                                                                      | Kuningan Public Health                                                                                                                                                                                                    | West Java Health Laboratory: School of Life Sciences and Technology, Institut Teknologi Bandung                                                                                                                                                                                                                                                                                 | Azzania Fibriani; Cut Nur Cinthia Alamanda; Ema Rahmawati; Isak Solihin; Kamila Tania; Karimatu Khoirunnisa; Miftahul Faridi; Rifky Waluyajati Rachman; Rini Robiani; Ryan Bayusantika Ristandi                                                                                                                                                                                                                                                                                                                                                                                                                      |
| EPI_ISL_747239                                                                                                                                                                                                                                                                                                                                                                                                                                                                                                                                                                                                                                                                                                                                                                                                                                                                                                                                                                                                                                                                                                                                                                                                                                                                                                                                                                                                                                                                                                                                                                                                                                                                                                                                                                                                                                                                                                                                                                                                                                                                                                                                                                                                                                                                                                                                                                                                                                                                                                                                                                                                                                                                                                                                                                                                                                                                                                                                                                                                                                                                                                                                                                                                                                                                                                                                                                                                                                                                                                                                                                                                                                                                                                                                                                                                                                                                                                                                                                                                                                                                                                                                                                                                                                                                                                                                                                                                                                                                                                                                                                                                                                                                                                                                                                                                                                                                                                                                                                                                                                                                                                                                                                                                                                                                                                                                                                                                                                                                                                                                                                                                                                                                                                                                                       | Kuningan Public Health Office                                                                                                                                                                                             | West Java Health Laboratory: School of Life Sciences and Technology, Institut Teknologi Bandung                                                                                                                                                                                                                                                                                 | Azzania Fibriani; Cut Nur Cinthia Alamanda; Ema Rahmawati; Isak Solihin; Karimatu Khoirunnisa; Miftahul Faridi; Rifky Waluyajati Rachman; Rini Robiani; Ryan Bayusantika Ristandi                                                                                                                                                                                                                                                                                                                                                                                                                                    |
| EPI_ISL_2502740                                                                                                                                                                                                                                                                                                                                                                                                                                                                                                                                                                                                                                                                                                                                                                                                                                                                                                                                                                                                                                                                                                                                                                                                                                                                                                                                                                                                                                                                                                                                                                                                                                                                                                                                                                                                                                                                                                                                                                                                                                                                                                                                                                                                                                                                                                                                                                                                                                                                                                                                                                                                                                                                                                                                                                                                                                                                                                                                                                                                                                                                                                                                                                                                                                                                                                                                                                                                                                                                                                                                                                                                                                                                                                                                                                                                                                                                                                                                                                                                                                                                                                                                                                                                                                                                                                                                                                                                                                                                                                                                                                                                                                                                                                                                                                                                                                                                                                                                                                                                                                                                                                                                                                                                                                                                                                                                                                                                                                                                                                                                                                                                                                                                                                                                                      | LABORATORIO CLINICO LABIN                                                                                                                                                                                                 | Incienza, Instituto Costarricense de Investigación y Enseñanza en NutriciOn y Salud                                                                                                                                                                                                                                                                                             | Adriana Godínez; Claudio Soto-Garita; Estela Cordero; Francisco Duarte; Hebleen Porras; Jose Luis Vargas; Joselyn Prado & Pei Chan; Mariela Gutierrez; Melany CalderOn                                                                                                                                                                                                                                                                                                                                                                                                                                               |
| EPI_ISL_1379427                                                                                                                                                                                                                                                                                                                                                                                                                                                                                                                                                                                                                                                                                                                                                                                                                                                                                                                                                                                                                                                                                                                                                                                                                                                                                                                                                                                                                                                                                                                                                                                                                                                                                                                                                                                                                                                                                                                                                                                                                                                                                                                                                                                                                                                                                                                                                                                                                                                                                                                                                                                                                                                                                                                                                                                                                                                                                                                                                                                                                                                                                                                                                                                                                                                                                                                                                                                                                                                                                                                                                                                                                                                                                                                                                                                                                                                                                                                                                                                                                                                                                                                                                                                                                                                                                                                                                                                                                                                                                                                                                                                                                                                                                                                                                                                                                                                                                                                                                                                                                                                                                                                                                                                                                                                                                                                                                                                                                                                                                                                                                                                                                                                                                                                                                      | LABORATORIO CLINICO LABIN                                                                                                                                                                                                 | Incienza, Instituto Costarricense de Investigación y Enseñanza en Nutrición y Salud                                                                                                                                                                                                                                                                                             | Adriana Godínez; Claudio Soto-Garita; Estela Cordero; Francisco Duarte; Hebleen Porras; Melany Calderón & Pei Ling Chan Ma                                                                                                                                                                                                                                                                                                                                                                                                                                                                                           |
| EPI_ISL_1821062                                                                                                                                                                                                                                                                                                                                                                                                                                                                                                                                                                                                                                                                                                                                                                                                                                                                                                                                                                                                                                                                                                                                                                                                                                                                                                                                                                                                                                                                                                                                                                                                                                                                                                                                                                                                                                                                                                                                                                                                                                                                                                                                                                                                                                                                                                                                                                                                                                                                                                                                                                                                                                                                                                                                                                                                                                                                                                                                                                                                                                                                                                                                                                                                                                                                                                                                                                                                                                                                                                                                                                                                                                                                                                                                                                                                                                                                                                                                                                                                                                                                                                                                                                                                                                                                                                                                                                                                                                                                                                                                                                                                                                                                                                                                                                                                                                                                                                                                                                                                                                                                                                                                                                                                                                                                                                                                                                                                                                                                                                                                                                                                                                                                                                                                                      | LABORATORIO CLINICO SYNLAB                                                                                                                                                                                                | Instituto Nacional de Salud- Dirección de Investigación en Salud Pública                                                                                                                                                                                                                                                                                                        | Carlos Franco-Muñoz; Carmen Osorio; Diana Malo; Diego A. Álvarez-Díaz; Diego Andrés Prada; Gerardo Santamaría; Hector Alejandro Ruiz-Moreno; Jhonnatan Reales-González; Jorge Rivera; Juan Camilo Martinez; Julian Naizaque; Katherine Laiton-Donato; Lisseth Pardo; Magdalena Wiesner; Marcela Mercado-Reyes; Maria T. Herrera-Sepúlveda; Martha Lucia Ospina Martinez; Paola Rojas; Sergio Gomez; Sheryll Corchuelo; Ángela Alarcón Cruz                                                                                                                                                                           |
| EPI_ISL_1220048                                                                                                                                                                                                                                                                                                                                                                                                                                                                                                                                                                                                                                                                                                                                                                                                                                                                                                                                                                                                                                                                                                                                                                                                                                                                                                                                                                                                                                                                                                                                                                                                                                                                                                                                                                                                                                                                                                                                                                                                                                                                                                                                                                                                                                                                                                                                                                                                                                                                                                                                                                                                                                                                                                                                                                                                                                                                                                                                                                                                                                                                                                                                                                                                                                                                                                                                                                                                                                                                                                                                                                                                                                                                                                                                                                                                                                                                                                                                                                                                                                                                                                                                                                                                                                                                                                                                                                                                                                                                                                                                                                                                                                                                                                                                                                                                                                                                                                                                                                                                                                                                                                                                                                                                                                                                                                                                                                                                                                                                                                                                                                                                                                                                                                                                                      | LABORATORIO CLÍNICO FUNDACIÓN HOSPITAL SAN PEDRO                                                                                                                                                                          | Instituto Nacional de Salud- Dirección de Investigación en Salud Pública                                                                                                                                                                                                                                                                                                        | Carlos Franco-Muñoz; Diego A. Álvarez-Díaz; Diego Andrés Prada; Gerardo Santamaría; Hector Alejandro Ruiz-Moreno; Jhonnatan Reales-González; Julian Naizaque; Katherine Laiton-Donato; Magdalena Wiesner; Marcela Mercado-Reyes.; Maria T. Herrera-Sepúlveda; Martha Lucia Ospina Martinez; Sheryll Corchuelo                                                                                                                                                                                                                                                                                                        |
| EPI_ISL_1213335                                                                                                                                                                                                                                                                                                                                                                                                                                                                                                                                                                                                                                                                                                                                                                                                                                                                                                                                                                                                                                                                                                                                                                                                                                                                                                                                                                                                                                                                                                                                                                                                                                                                                                                                                                                                                                                                                                                                                                                                                                                                                                                                                                                                                                                                                                                                                                                                                                                                                                                                                                                                                                                                                                                                                                                                                                                                                                                                                                                                                                                                                                                                                                                                                                                                                                                                                                                                                                                                                                                                                                                                                                                                                                                                                                                                                                                                                                                                                                                                                                                                                                                                                                                                                                                                                                                                                                                                                                                                                                                                                                                                                                                                                                                                                                                                                                                                                                                                                                                                                                                                                                                                                                                                                                                                                                                                                                                                                                                                                                                                                                                                                                                                                                                                                      | LAFEM/UESC                                                                                                                                                                                                                | Bioinformatics Laboratory / LNCC                                                                                                                                                                                                                                                                                                                                                | Alessandra P Lamarca; Alexandra L Gerber; Ana Paula Melo Albuquerque; Ana Paula de C Guimarães; Ana Tereza R Vasconcelos; Angela Maria Guimarães Santos; Bianca Mendes Maciel; Danielle Angst Secco; Eduardo Sérgio Soares Sousa; Eloiza Helena Campana; Francisco Paulo Freire Neto; George Rego Mariano; Kátia Castanho Scoretcci; Lucymara Fassarella Agnez Lima; Luiz G P de Almeida; Luís Cristóvão Porto; Otavio J. Brustolini; Paulo Ricardo Nascimento; Ronaldo                                                                                                                                              |

|                                                                                                                                                                                                                                                                                                                                                                                                                                                                                                             |                                                                                                            |                                                                                                                                                                                                     |                                                                                                                                                                                                                                                                                                                                                                                                                                                                                    |  |
|-------------------------------------------------------------------------------------------------------------------------------------------------------------------------------------------------------------------------------------------------------------------------------------------------------------------------------------------------------------------------------------------------------------------------------------------------------------------------------------------------------------|------------------------------------------------------------------------------------------------------------|-----------------------------------------------------------------------------------------------------------------------------------------------------------------------------------------------------|------------------------------------------------------------------------------------------------------------------------------------------------------------------------------------------------------------------------------------------------------------------------------------------------------------------------------------------------------------------------------------------------------------------------------------------------------------------------------------|--|
| EPI_ISL_1904967,<br>EPI_ISL_1904969,<br>EPI_ISL_1904971,<br>EPI_ISL_1904972,<br>EPI_ISL_1904973,<br>EPI_ISL_1904974<br><br>EPI_ISL_2342608<br>EPI_ISL_1091786                                                                                                                                                                                                                                                                                                                                               | LAM ORIADE ABBAYE ST MARTIN D'HERES<br><br><br><br><br>LBRKM Government Medical College, Jagdalpur<br>LDSP | CNR Virus des Infections Respiratoires - France SUD<br><br><br><br><br>Institute of Life Sciences - INSACOG<br>Universidad Nacional de Colombia - Laboratorio Genómico One Health                   | da Silva Francisco Jr; Sandra Rocha Gadelha; Selma Maria Bezerra Jeronimo; Vinicius Pietta Perez<br>Antonin Bal; Bruno Lina; Gregory Destras; Gwendolynne Burfin; Hadrien Regue; Laurence Josset; Martine Vallett; Quentin Semanas                                                                                                                                                                                                                                                 |  |
|                                                                                                                                                                                                                                                                                                                                                                                                                                                                                                             |                                                                                                            |                                                                                                                                                                                                     | Ajay Parida; Amol M. Kanampalliwar; Arup Ghosh; Atimukta Jha; INSACOG Consortium; Omprakash Shiriwas; Punit Prasad; Rajeeb Swain; Rupesh Dash; Safal Walla; Sana Fatma; Shifu Aggarwal; Sunil K. Raghav<br>Andres F. Cardona-Rios; Carlos Franco-Muñoz; Daniel O. Maldonado-Perez; Diego A. Álvarez-Díaz; Idabely Betancur Ortiz; Jorge E. Osorio; Juan P. Hernandez-Ortiz; Karl A Cluoderis; Laura Silvana Perez; Marcela Mercado-Reyes; Maria Angélica Maya; Sandra Ines Cano    |  |
|                                                                                                                                                                                                                                                                                                                                                                                                                                                                                                             |                                                                                                            |                                                                                                                                                                                                     | Carlos Franco-Muñoz; Carmen Osorio; Diana Malo; Diego A. Álvarez-Díaz; Diego Andrés Prada; Gerardo Santamaría; Hector Alejandro Ruiz-Moreno; Jhonnatan Reales-González; Jorge Rivera; Juan Camilo Martínez; Julian Naizaque; Katherine Laiton-Donato; Lisseth Pardo; Magdalena Wiesner; Marcela Mercado-Reyes; Maria T. Herrera-Sepúlveda; Marta Lopez Blanco; Martha Lucia Ospina Martinez; Paola Rojas; Sergio Gomez; Sheryll Corchuelo; Ángela Alarcon Cruz                     |  |
|                                                                                                                                                                                                                                                                                                                                                                                                                                                                                                             |                                                                                                            |                                                                                                                                                                                                     | Carlos Franco-Muñoz; Carmen Osorio; Diana Malo; Diego A. Álvarez-Díaz; Diego Andrés Prada; Gerardo Santamaría; Hector Alejandro Ruiz-Moreno; Jhonnatan Reales-González; Jorge Rivera; Juan Camilo Martínez; Julian Naizaque; Katherine Laiton-Donato; Lisseth Pardo; Magdalena Wiesner; Marcela Mercado-Reyes; Maria T. Herrera-Sepúlveda; Marta Lopez Blanco; Martha Lucia Ospina Martinez; Paola Rojas; Sergio Gomez; Sheryll Corchuelo; Ángela Alarcon Cruz                     |  |
|                                                                                                                                                                                                                                                                                                                                                                                                                                                                                                             |                                                                                                            |                                                                                                                                                                                                     | Carlos Franco-Muñoz; Carmen Osorio; Diana Malo; Diego A. Álvarez-Díaz; Diego Andrés Prada; Gerardo Santamaría; Hector Alejandro Ruiz-Moreno; Jhonnatan Reales-González; Jorge Rivera; Juan Camilo Martínez; Julian Naizaque; Katherine Laiton-Donato; Lisseth Pardo; Magdalena Wiesner; Marcela Mercado-Reyes; Maria T. Herrera-Sepúlveda; Marta Lopez Blanco; Martha Lucia Ospina Martinez; Paola Rojas; Sergio Gomez; Sheryll Corchuelo; Ángela Alarcon Cruz                     |  |
| EPI_ISL_2016831, EPI_ISL_2545652, EPI_ISL_2545663, EPI_ISL_2628050, EPI_ISL_2628051, EPI_ISL_2628053, EPI_ISL_2628056, EPI_ISL_2628058, EPI_ISL_2628059, EPI_ISL_2628060, EPI_ISL_2714890, EPI_ISL_2714893, EPI_ISL_2714896, EPI_ISL_2714897, EPI_ISL_2714898, EPI_ISL_2714899, EPI_ISL_2714900, EPI_ISL_2714901                                                                                                                                                                                            | see above                                                                                                  | LHUB-ULB                                                                                                                                                                                            | Basil Britto Xavier; Christine Lammens; Herman Goossens; Ines Verbesselt; Jasmine Coppens; Kathleen Holemans; Marie Le Mercier; Veerle Mattheuessen                                                                                                                                                                                                                                                                                                                                |  |
| EPI_ISL_1219272,<br>EPI_ISL_2141780                                                                                                                                                                                                                                                                                                                                                                                                                                                                         | see above                                                                                                  | LIC                                                                                                                                                                                                 | Latvian Biomedical Research and Study Centre<br>Davids Fridmanis; Diana Dusacka; Elina Dimina; Guntars Zarins; Ivars Silamikelis; Janis Klovinis; Janis Pjalkovskis; Juris Perevoscikovs; Kaspars Megnis; Laila Silamikele; Lauma Freimane; Laura Ansonė; Liga Birzniece; Monta Ustinova; Nikita Zrelavs; Reinis Zeltmatis; Uga Dumpis; Una Krumina; Vita Rovite                                                                                                                   |  |
| EPI_ISL_1969244,<br>EPI_ISL_1969245                                                                                                                                                                                                                                                                                                                                                                                                                                                                         | Lab RSUP DR Mohammad Hoesin Palembang                                                                      | National Institute of Health Research and Development                                                                                                                                               | Arie Ardiansyah Nugraha; Hana Aparsi Pawestri; Kartika Dewi Puspa; Krisna Pangesti; Nelly Puspandari; Subangkit; Triyani Soekarso; Vivi Setiawaty                                                                                                                                                                                                                                                                                                                                  |  |
| EPI_ISL_1827216, EPI_ISL_2192265, EPI_ISL_2192404, EPI_ISL_2192405, EPI_ISL_2192420, EPI_ISL_2192463, EPI_ISL_2362819, EPI_ISL_2362860, EPI_ISL_2362935, EPI_ISL_2362951, EPI_ISL_2362955, EPI_ISL_2604978, EPI_ISL_2605014, EPI_ISL_2605046, EPI_ISL_2605052, EPI_ISL_2605092, EPI_ISL_2605104, EPI_ISL_2605118, EPI_ISL_2605240, EPI_ISL_2605297, EPI_ISL_2605356, EPI_ISL_2605437, EPI_ISL_2605502, EPI_ISL_2605509, EPI_ISL_2605553, EPI_ISL_2605579, EPI_ISL_2605596, EPI_ISL_2605622, EPI_ISL_2605647 | see above                                                                                                  | Lab voor klinische biologie                                                                                                                                                                         | Bruno Verhasselt; Hannelore Hamerlinck; Marija Janevska                                                                                                                                                                                                                                                                                                                                                                                                                            |  |
| EPI_ISL_2121121                                                                                                                                                                                                                                                                                                                                                                                                                                                                                             | LabKom - Labor Augsburg MVZ GmbH                                                                           | Robert Koch Institute                                                                                                                                                                               |                                                                                                                                                                                                                                                                                                                                                                                                                                                                                    |  |
| EPI_ISL_2121307                                                                                                                                                                                                                                                                                                                                                                                                                                                                                             | LabKom - Labor an der Salzbrücke MVZ GmbH                                                                  | Robert Koch Institute                                                                                                                                                                               |                                                                                                                                                                                                                                                                                                                                                                                                                                                                                    |  |
| EPI_ISL_2313482                                                                                                                                                                                                                                                                                                                                                                                                                                                                                             | LabKom - Labor an der Salzbrücke MVZ GmbH                                                                  | Robert Koch Institute                                                                                                                                                                               |                                                                                                                                                                                                                                                                                                                                                                                                                                                                                    |  |
| EPI_ISL_2233094                                                                                                                                                                                                                                                                                                                                                                                                                                                                                             | Labkedas Prov Kal Tim                                                                                      | National Institute of Health Research and Development                                                                                                                                               | Arie Ardiansyah Nugraha; Hana Aparsi Pawestri; Hartanti Dian Ikawati; Kartika Dewi Puspa; Krisna Pangesti; Nelly Puspandari; Subangkit; Triyani Soekarso; Vivi Setiawaty                                                                                                                                                                                                                                                                                                           |  |
| EPI_ISL_1263004, EPI_ISL_1517463, EPI_ISL_1788929, EPI_ISL_1915155, EPI_ISL_1915156, EPI_ISL_2029687, EPI_ISL_2029713, EPI_ISL_2029727, EPI_ISL_2029740, EPI_ISL_2029751, EPI_ISL_2029877, EPI_ISL_2029916, EPI_ISL_2532185, EPI_ISL_2612577, EPI_ISL_2612650                                                                                                                                                                                                                                               | see above                                                                                                  | Labo Analyses Med                                                                                                                                                                                   | Angela Brisebarre; Anne Holstein; Camille Cape; Christophe Malabat; Corinne Maufrais; Elodie Etienne; Emmanuelle Permal; Etienne Simon-Lorière; Fabienne Artur; Frédéric Lemoine; GréGoire Potiron; Hue; Jean Boyer; Judith Zerah; Louise Lefrançois; Marion Barbet; Maud Vanpeene; Méline Bizard; Pierre Lechat; Pierre Netzer; Said-Delattre Ophélie; Sophie Chalmrin; Sylvie Behilli; Sylvie Van der Werf; Victoire Baillet; Vincent Enouf                                      |  |
| EPI_ISL_2422226                                                                                                                                                                                                                                                                                                                                                                                                                                                                                             | Labo Klinische Biologie, UZA                                                                               | Labo Klinische Biologie, UZA                                                                                                                                                                        | Basil Britto Xavier; Christine Lammens; Herman Goossens; Jasmine Coppens; Marie Le Mercier; Veerle Mattheuessen                                                                                                                                                                                                                                                                                                                                                                    |  |
| EPI_ISL_2348574, EPI_ISL_2348575, EPI_ISL_2348576, EPI_ISL_2348577, EPI_ISL_2348578, EPI_ISL_2348579, EPI_ISL_2348580, EPI_ISL_2348581, EPI_ISL_2348582, EPI_ISL_2348583, EPI_ISL_2348584, EPI_ISL_2348585, EPI_ISL_2348587, EPI_ISL_2348588, EPI_ISL_2348589, EPI_ISL_2348590, EPI_ISL_2348591, EPI_ISL_2348592, EPI_ISL_2382824                                                                                                                                                                           | see above                                                                                                  | Labo Luc Olivier                                                                                                                                                                                    | Bouchra Boujemla; Cécile Meex; Keith Durkin; Maria Artesi; Marie-Pierre Hayette; Nathalie Renotte; Pierrette Melin; Raphaël Boreux; Sébastien Bontems; Vincent Bours                                                                                                                                                                                                                                                                                                               |  |
| EPI_ISL_1843504, EPI_ISL_2109111, EPI_ISL_2121556, EPI_ISL_2121887, EPI_ISL_2121903, EPI_ISL_2125917, EPI_ISL_2260092, EPI_ISL_2260146, EPI_ISL_2260299, EPI_ISL_2260301, EPI_ISL_2260332                                                                                                                                                                                                                                                                                                                   | see above                                                                                                  | Labor 28 MVZ GmbH                                                                                                                                                                                   | Robert Koch Institute                                                                                                                                                                                                                                                                                                                                                                                                                                                              |  |
| EPI_ISL_2386808, EPI_ISL_2386838, EPI_ISL_2386840, EPI_ISL_2389915, EPI_ISL_2389924, EPI_ISL_2389927, EPI_ISL_2389938, EPI_ISL_2389939, EPI_ISL_2389949                                                                                                                                                                                                                                                                                                                                                     | see above                                                                                                  | Labor Becker & Kollegen (Standort München)                                                                                                                                                          | Robert Koch Institute                                                                                                                                                                                                                                                                                                                                                                                                                                                              |  |
| EPI_ISL_1921855                                                                                                                                                                                                                                                                                                                                                                                                                                                                                             | Labor Berlin Charite Vivantes GmbH / Institut für Virologie                                                | Charité Universitätsmedizin Berlin, Institut für Virologie/Labor Berlin                                                                                                                             | Barbara Mühlemann; Christian Drosten; Christine Stephan; Peter Menzel; Rolf Schwarzer; Terry Jones; Victor M Corman                                                                                                                                                                                                                                                                                                                                                                |  |
| EPI_ISL_1840801, EPI_ISL_1840814, EPI_ISL_1840828, EPI_ISL_1886104, EPI_ISL_2107830, EPI_ISL_2107835, EPI_ISL_2107839, EPI_ISL_2694826                                                                                                                                                                                                                                                                                                                                                                      | see above                                                                                                  | Labor Berlin Charité Vivantes GmbH / Institut für Virologie                                                                                                                                         | Charité Universitätsmedizin Berlin, Institut für Virologie/Labor Berlin                                                                                                                                                                                                                                                                                                                                                                                                            |  |
| EPI_ISL_1904299                                                                                                                                                                                                                                                                                                                                                                                                                                                                                             | Labor Doz Dr Stefan Mustafa                                                                                | AGES IMED Vienna                                                                                                                                                                                    | Barbara Mühlemann; Christian Drosten; Christine Stephan; Peter Menzel; Rolf Schwarzer; Terry Jones; Victor M Corman                                                                                                                                                                                                                                                                                                                                                                |  |
| EPI_ISL_2384664                                                                                                                                                                                                                                                                                                                                                                                                                                                                                             | Labor Dr. Fenner und Kollegen                                                                              | Heinrich Pette Institute, Leibniz Institute for Experimental Virology                                                                                                                               | Alexander Indra; Elisabeth Walter; Johanna Schmitt; Jasma Meschini; Stefan Mustafa; Theodora Ziu                                                                                                                                                                                                                                                                                                                                                                                   |  |
| EPI_ISL_1566762,<br>EPI_ISL_1851395,<br>EPI_ISL_1851414,<br>EPI_ISL_2632175                                                                                                                                                                                                                                                                                                                                                                                                                                 | Labor Dr. Heidrich & Kollegen MVZ GmbH Hamburg                                                             | Robert Koch Institute                                                                                                                                                                               | Adam Grundhoff; Alexis Robitaille; Johannes Knobloch; Martin Aepfelbacher; Nicole Fischer; Thomas Günther                                                                                                                                                                                                                                                                                                                                                                          |  |
| EPI_ISL_2125466<br>EPI_ISL_2125129                                                                                                                                                                                                                                                                                                                                                                                                                                                                          | Labor Dr. Schumacher MVZ<br>Labor Dr. Spranger                                                             | Robert Koch Institute<br>Robert Koch Institute                                                                                                                                                      |                                                                                                                                                                                                                                                                                                                                                                                                                                                                                    |  |
| EPI_ISL_2111026                                                                                                                                                                                                                                                                                                                                                                                                                                                                                             | Labor Dr. Wisplinghoff - Kaln                                                                              | Robert Koch Institute                                                                                                                                                                               |                                                                                                                                                                                                                                                                                                                                                                                                                                                                                    |  |
| EPI_ISL_1848757                                                                                                                                                                                                                                                                                                                                                                                                                                                                                             | Labor MÄnchengladbach MVZ Dr. Stein + Kollegen GbR                                                         | Robert Koch Institute                                                                                                                                                                               |                                                                                                                                                                                                                                                                                                                                                                                                                                                                                    |  |
| EPI_ISL_2111454                                                                                                                                                                                                                                                                                                                                                                                                                                                                                             | Labor ZOTZ/KLIMAS; MVZ Dusseldorf-Centrum                                                                  | Robert Koch Institute                                                                                                                                                                               |                                                                                                                                                                                                                                                                                                                                                                                                                                                                                    |  |
| EPI_ISL_2111142                                                                                                                                                                                                                                                                                                                                                                                                                                                                                             | Laborarztpraxis Dres. med. Walther Weindel & Kollegen                                                      | Robert Koch Institute                                                                                                                                                                               |                                                                                                                                                                                                                                                                                                                                                                                                                                                                                    |  |
| EPI_ISL_428961,<br>EPI_ISL_434504                                                                                                                                                                                                                                                                                                                                                                                                                                                                           | Laboratoire National de Sante, Microbiology, Virology                                                      | Laboratoire National de Sante, Microbiology, Epidemiology and Microbial Genomics                                                                                                                    | Anke Wienecke-Baldacchino; Ardeshal Latsuzbaia; Catherine Ragimbeau; Guillaume Fournier; Jessica Tapp; Joel Mossong; Tamir Abdelrahman; Trung Nguyen Nguyen                                                                                                                                                                                                                                                                                                                        |  |
| EPI_ISL_2157368,<br>EPI_ISL_2492506                                                                                                                                                                                                                                                                                                                                                                                                                                                                         | Laboratoire National de Santé Publique - LNSP (HAITI - LNSP)                                               | Laboratory of Respiratory Viruses and Measles, Oswaldo Cruz Institute, FIOCRUZ                                                                                                                      | Alice Sampaio Rocha; Ana Carolina Mendonca; Anna Carolina Paixao; Elisa Cavalcante Pereira; Fernando Motta; Ito Journal; Jaques Boncy; Luciana Appolinario; Marilda Siqueira on behalf of the Fiocruz COVID-19 Genomic Surveillance Network; Paola Resende; Patrick Dely; Renata Serrano Lopes; Taina Venas                                                                                                                                                                        |  |
| EPI_ISL_2137841,<br>EPI_ISL_2137843                                                                                                                                                                                                                                                                                                                                                                                                                                                                         | Laboratoire Professeur Daniel GAHOUMA (LPDG)                                                               | Centre de Recherches Médicales de Lambaréné (CERMEL)                                                                                                                                                | Bertrand Lell and Ayola Akim Adegnika; Davy Leger Mouangala; Georgelin Nguma Ondo; Guy Stéphane Padzys; Gédéon Prince Manouana; Jean Bernard Lekana-Douki; Joël-Fleury Djoba Siawaya; Ludovic Mewono; Moustapha Nzamba Maloum; Noé Patrick Mbondoukwe; Rodrigue Bikangu; Rodrigue Mimsa Nguma; Sam O'neilla Oye Binguo; Samira Zoa Assoumou; Sandrine Zeh Mfor; Srinivas reddy Pallerla; Steffen Borrmann; Thirumalaisamy P. Velavan                                               |  |
| EPI_ISL_1760554,<br>EPI_ISL_1760555                                                                                                                                                                                                                                                                                                                                                                                                                                                                         | Laboratoire Professeur Daniel GAHOUMA (LPDG)                                                               | Centre de recherches médicales de Lambaréné (CERMEL)                                                                                                                                                | Ayola A. Adegnika; Ayong Moure; Bertrand Lell; Bénédicte Ndeboko; Emilio Skarwan; Georgelin Nguma Ondo; Gédéon P. Manouana; Haruka Abe; Jiro Yasuda; Joel Fleury Djoba Siawaya; Rodrigue Bikangu; Rotimi Myrabelle Avome Houecheuou; Samira Zoa-Assoumou; Turi Ushijima                                                                                                                                                                                                            |  |
| EPI_ISL_660451, EPI_ISL_660466, EPI_ISL_660472, EPI_ISL_660473, EPI_ISL_660479, EPI_ISL_660492, EPI_ISL_660512, EPI_ISL_660514, EPI_ISL_660523, EPI_ISL_2142720, EPI_ISL_2142730                                                                                                                                                                                                                                                                                                                            | see above                                                                                                  | Centre Muraz                                                                                                                                                                                        | Abdoul-Salam Ouedraogo; Amariane Koné; Arnel Poda; Arsène Zongo; Essia Belarbi; Fabian Leendertz; Grit Schubert; Halidou Tinto; Lassana Sangaré; Soumeya Ouangraoua; Thérèse Kagoné; Yacouba Sawadogo; Zekiba Tarnagda                                                                                                                                                                                                                                                             |  |
| EPI_ISL_890130,<br>EPI_ISL_1366066,<br>EPI_ISL_2499845                                                                                                                                                                                                                                                                                                                                                                                                                                                      | Laboratoire de Microbiologie CHU Sourou Sanou                                                              | Laboratoire de santé publique du Québec                                                                                                                                                             | Guillaume Bourque; Ioannis Ragoussis; Jesse Shapiro; Mark Lathrop and Michel Roger on behalf of the CoVSeQ research group; Mark Lathrop and Michel Roger on behalf of the CoVSeQ research group (http://covseq.ca/researchgroup); Sandrine Moreira                                                                                                                                                                                                                                 |  |
| EPI_ISL_476825,<br>EPI_ISL_476831,<br>EPI_ISL_476833                                                                                                                                                                                                                                                                                                                                                                                                                                                        | Laboratoire des Fièvres Hémorragiques Virales du Benin                                                     | Charité-Universitätsmedizin Berlin                                                                                                                                                                  | Ange; Drexler; Jan Felix; Moreira-Soto Andres; Sander Anna-Lena; Yadouleton                                                                                                                                                                                                                                                                                                                                                                                                        |  |
| EPI_ISL_1383372,<br>EPI_ISL_1383601,<br>EPI_ISL_1383692,<br>EPI_ISL_1918325,<br>EPI_ISL_2401053                                                                                                                                                                                                                                                                                                                                                                                                             | Laboratoire national de sante, Microbiology, Virology                                                      | Laboratoire national de sante, Microbiology, Microbial Genomics Platform                                                                                                                            | Anke Wienecke-Baldacchino; Catherine Ragimbeau; Fatu Djabi; Jessica Tapp; Lise Pignon; Raoul Salmon; Tamir Abdelrahman; Trung Nguyen Nguyen                                                                                                                                                                                                                                                                                                                                        |  |
| EPI_ISL_740051,<br>EPI_ISL_740103                                                                                                                                                                                                                                                                                                                                                                                                                                                                           | Laboratoire national de santé, Microbiology, Virology                                                      | Laboratoire national de santé, Microbiology, Microbial Genomics Platform                                                                                                                            | Anke Wienecke-Baldacchino; Catherine Ragimbeau; Fatu Djabi; Jessica Tapp; Tamir Abdelrahman                                                                                                                                                                                                                                                                                                                                                                                        |  |
| EPI_ISL_1917963,<br>EPI_ISL_1917983,<br>EPI_ISL_1917984                                                                                                                                                                                                                                                                                                                                                                                                                                                     | Laboratoires Reunis                                                                                        | Laboratoire national de sante, Microbiology, Microbial Genomics Platform                                                                                                                            | Anke Wienecke-Baldacchino; Bernard Weber; Catherine Ragimbeau; Fatu Djabi; Jessica Tapp; Lise Pignon; Raoul Salmon; Tamir Abdelrahman                                                                                                                                                                                                                                                                                                                                              |  |
| EPI_ISL_1384454,<br>EPI_ISL_1522940,<br>EPI_ISL_2400706                                                                                                                                                                                                                                                                                                                                                                                                                                                     | Laboratoires d'analyses medicales - Ketterhill                                                             | Laboratoire national de sante, Microbiology, Microbial Genomics Platform                                                                                                                            | Anke Wienecke-Baldacchino; Caroline Scheiber; Catherine Ragimbeau; Fatu Djabi; Jessica Tapp; Lise Pignon; Raoul Salmon; Serge Vedy; Tamir Abdelrahman                                                                                                                                                                                                                                                                                                                              |  |
| EPI_ISL_1395935                                                                                                                                                                                                                                                                                                                                                                                                                                                                                             | Laboratorio Central De Redes y Programas                                                                   | Grupo de Genómica y Bioinformática del Instituto de Investigación de la Cadena Láctea CONICET-INTA on behalf of 'Proyecto Argentino Interinstitucional de genómica de SARS-CoV-2' (PAIS Consortium) | AF; Amadio; Antonieta Cayré; Eberhardt; Gerardo Andino; Irazoqui; Laura Lescano; MF; Natalia Ruiz Diaz                                                                                                                                                                                                                                                                                                                                                                             |  |
| EPI_ISL_2534969                                                                                                                                                                                                                                                                                                                                                                                                                                                                                             | Laboratorio Central Noel Nutels                                                                            | Bioinformatics Laboratory / LNCC                                                                                                                                                                    | Alessandra P Lamarca; Alexandra L Gerber; Amílcar Tanuri; Ana Paula de C Guimarães; Ana Tereza R Vasconcelos; Andrea Cony Cavalcanti; Caio Luiz Pereira Ribeiro; Cassia Alves; Cintia Policarpo; Claudia Maria Braga de Mello; Cristiane Gomes da Silva; Diana Mariani; Douglas Terra Machado; Flavio Dias da Silva; Gleidson da Silva de Oliveira; Leandro Magalhães de Souza; Liliane Cavalcante; Luiz G P de Almeida; Marcio Henrique de Oliveira Garcia; Mario Sergio Ribeiro; |  |

|                                                                                                                                                                                                            |                                                                                                                                                        |                                                                                                                                                                                                                                                                |                                                                                                                                                                                                                                                                                                                                                                                                                                                                                                           |
|------------------------------------------------------------------------------------------------------------------------------------------------------------------------------------------------------------|--------------------------------------------------------------------------------------------------------------------------------------------------------|----------------------------------------------------------------------------------------------------------------------------------------------------------------------------------------------------------------------------------------------------------------|-----------------------------------------------------------------------------------------------------------------------------------------------------------------------------------------------------------------------------------------------------------------------------------------------------------------------------------------------------------------------------------------------------------------------------------------------------------------------------------------------------------|
| EPI_ISL_1395959                                                                                                                                                                                            | Laboratorio Central de Salud Pública de la Provincia de Jujuy                                                                                          | Instituto de Patología Vegetal (CIAP-INTA) on behalf of 'Proyecto Argentino Interinstitucional de genómica de SARS-CoV-2' (PAIS Consortium)                                                                                                                    | Ronaldo da Silva F Jr; Silvia Carvalho<br>A. Miguel Alejandro Charre; Amadio; Ariel David Fridman; Claudia Mamani; Debat, HJ.; FD; Fabiana Vaca.; Fernández; Irazoqui, M.; Marquez, N.                                                                                                                                                                                                                                                                                                                    |
| EPI_ISL_792515, EPI_ISL_1395866, EPI_ISL_1395898, EPI_ISL_2363542                                                                                                                                          | Laboratorio Central de la Ciudad de Santa Fe                                                                                                           | Grupo de Genómica y Bioinformática del Instituto de Investigación de la Cadena Láctea CONICET-INTA on behalf of 'Proyecto Argentino Interinstitucional de genómica de SARS-CoV-2' (PAIS Consortium)                                                            | AF; Amadio; C; Eberhardt; G; Irazoqui; JM; MF; Mugna; Ojeda; Pastor; Rompató; V                                                                                                                                                                                                                                                                                                                                                                                                                           |
| EPI_ISL_1395978, EPI_ISL_2271705                                                                                                                                                                           | Laboratorio Central, Ministerio de Salud Cordoba                                                                                                       | Instituto de Patología Vegetal (CIAP-INTA) on behalf of 'Proyecto Argentino Interinstitucional de genómica de SARS-CoV-2' (PAIS Consortium)                                                                                                                    | Barbas, G.; Castro, G.; Debat, HJ.; FD; Fernandez; Fernández; M; M.B.; Marquez, N.; Pisano; Re, V.                                                                                                                                                                                                                                                                                                                                                                                                        |
| EPI_ISL_2007567                                                                                                                                                                                            | Laboratorio Central, Ministerio de Salud Córdoba                                                                                                       | Instituto de Patología Vegetal (CIAP-INTA) on behalf of 'Proyecto Argentino Interinstitucional de genómica de SARS-CoV-2' (PAIS Consortium)                                                                                                                    | A; Amadio; Barbas, G.; Castro, G.; Debat, HJ.; FD; Fernández; Irazoqui; M; M.B.; Marquez, N.; Pisano; Re, V.                                                                                                                                                                                                                                                                                                                                                                                              |
| EPI_ISL_2139519                                                                                                                                                                                            | Laboratorio Exame                                                                                                                                      | Universidade Federal de Ciencias da Saude de Porto Alegre                                                                                                                                                                                                      | Gabriel Dickin Caldana et al.; Vinícius Bonetti Franceschi                                                                                                                                                                                                                                                                                                                                                                                                                                                |
| EPI_ISL_2536361                                                                                                                                                                                            | Laboratorio HUB -Azienda Ospedaliero Universitaria - AOU - Cagliari                                                                                    | Laboratorio SPOKE Biologia Molecolare -Azienda Ospedaliero Universitaria - AOU - Cagliari                                                                                                                                                                      | Alessandra Scano; Ferdinando Coghe; Germano Orrù; Miriam Loddò; Riccardo Cappai; Sara Fais; Valentina Medda                                                                                                                                                                                                                                                                                                                                                                                               |
| EPI_ISL_2462063                                                                                                                                                                                            | Laboratorio de Biología Molecular, Hospital San Pedro Claver                                                                                           | Microbiología Molecular, Instituto SELADIS, Universidad Mayor de San Andrés                                                                                                                                                                                    | Aneth Vasquez Michel; Carmen Delgado Barrera; Oscar M. Rollano-Peñaloza; Sandra Miranda Sardon                                                                                                                                                                                                                                                                                                                                                                                                            |
| EPI_ISL_1278277, EPI_ISL_1278278, EPI_ISL_2600378                                                                                                                                                          | Laboratorio de Biología Molecular, Hospital San Pedro Claver                                                                                           | Molecular Genetics Laboratory, Instituto de Investigaciones Químicas, Universidad Mayor de San Andrés                                                                                                                                                          | Aneth Vasquez Michel; Carmen Delgado Barrera; Oscar M. Rollano-Peñaloza; Sandra Miranda Sardon                                                                                                                                                                                                                                                                                                                                                                                                            |
| EPI_ISL_1278281, EPI_ISL_1278284                                                                                                                                                                           | Laboratorio de Biología Molecular, SEDES-Potosi                                                                                                        | Molecular Genetics Laboratory, Instituto de Investigaciones Químicas, Universidad Mayor de San Andrés                                                                                                                                                          | Aneth Vasquez Michel; Oscar M. Rollano-Peñaloza                                                                                                                                                                                                                                                                                                                                                                                                                                                           |
| EPI_ISL_626564                                                                                                                                                                                             | Laboratorio de Biología Molecular, Facultad de Medicina, Universidad de Atacama, Copiapo, Chile/ FONDAF CRG, Universidad Andrés Bello, Santiago, Chile | Center for Mathematical Modeling and Center for Genome Regulation. Santiago, Chile                                                                                                                                                                             | Allende ML; Bastias M; Castro E; Echeverría C; González M; M; Maass A; Manríquez R; Meneses C.; Montecino; Orellana A; Sanhueza D; Travisany D                                                                                                                                                                                                                                                                                                                                                            |
| EPI_ISL_591534                                                                                                                                                                                             | Laboratorio de Infectología y virología molecular                                                                                                      | Center for Mathematical Modeling and Center for Genome Regulation. Santiago, Chile                                                                                                                                                                             | Allende ML; Ferres M.; Gaete A; González M; Maass A; Palma R; Travisany D; Urra C; Valiente F; Varas M                                                                                                                                                                                                                                                                                                                                                                                                    |
| EPI_ISL_792441                                                                                                                                                                                             | Laboratorio de Inmunología del Hospital Perrando e Instituto de Medicina Regional de la UNNE                                                           | Instituto de Biotecnología, IABIMO (CONICET), Instituto de Virología, IVIT(CONICET), Instituto de Patobiología, IPVET(CONICET), CICVYA, INTA on behalf of 'Proyecto Argentino Interinstitucional de genómica de SARS-CoV-2' (PAIS Consortium)                  | A; AF; AJ; AV; Asumendi; Ayala; Bengoa Luoni; Cacciabué; Cayré; D; Deluca; Distéfano; Farber; Fass; Foussal; G; GA; Gusiáno; Gómez; H; König; L; LC; Lescano; Lozano Calderón; Lucero; M; MD; MG; MPD; MV; Marin; Muñoz Hidalgo; NA; NB; PA; Paniego; Pedroarias; Peralta; Puebla; Rivarola; S; VC; Vera; Viegas, M.; Zavallo                                                                                                                                                                             |
| EPI_ISL_953422                                                                                                                                                                                             | Laboratorio de Investigaciones de Baney                                                                                                                | "Swiss Tropical and Public Health Institute"                                                                                                                                                                                                                   | "Carlos Cortes; Bonifacio Manguire Nlavo; Claudia Daubenberger; Diosdado Odjama Nseng Ada; Elizabeth Nyakarungu; Guillermo García; Maximilian Mpina; Mitoha Ondo O Ayekaba; Philip Wonder Phiri"; Salome Hosch; Tobias Schindler                                                                                                                                                                                                                                                                          |
| EPI_ISL_1673329, EPI_ISL_1673330, EPI_ISL_1700675, EPI_ISL_1700678, EPI_ISL_1700685, EPI_ISL_1700686, EPI_ISL_1700687, EPI_ISL_2002669, EPI_ISL_2002670, EPI_ISL_2002686, EPI_ISL_2002687, EPI_ISL_2002688 | Laboratorio de Investigaciones de Baney                                                                                                                | Swiss Tropical and Public Health Institute                                                                                                                                                                                                                     | Bonifacio Manguire Nlavo; Carlos Cortes; Claudia Daubenberger; Diosdado Odjama Nseng Ada; Elizabeth Nyakarungu; Guillermo García; Maximilian Mpina; Mitoha Ondo O Ayekaba; Philip Wonder Phiri; Philipp Wagner; Salome Hosch; Tobias Schindler; Yahya Maidane                                                                                                                                                                                                                                             |
| EPI_ISL_648316, EPI_ISL_648339, EPI_ISL_648361                                                                                                                                                             | Laboratorio de Investigaciones de Baney                                                                                                                | University Hospital Basel, Clinical Bacteriology                                                                                                                                                                                                               | Adrian Egli; Alfredo Mari; Bonifacio Manguire Nlavo; Carlos Cortes; Claudia Daubenberger; Diosdado Odjama Nseng Ada; Elizabeth Nyakarungu; Guillermo García; Helena Seth-Smith; Madlen Stange; Maximilian Mpina; Mitoha Ondo O Ayekaba; Philip Wonder Phiri; Salome Hosch; Tim Roloff; Tobias Schindler                                                                                                                                                                                                   |
| EPI_ISL_2462066                                                                                                                                                                                            | Laboratorio de Referencia Departamental en Inmunología, Sedes-Pando                                                                                    | Molecular Genetics Laboratory, Instituto de Investigaciones Químicas, Universidad Mayor de San Andrés                                                                                                                                                          | Aneth Vasquez Michel; Carmen Delgado Barrera; Oscar M. Rollano-Peñaloza; Sandra Miranda Sardon                                                                                                                                                                                                                                                                                                                                                                                                            |
| EPI_ISL_1137619                                                                                                                                                                                            | Laboratorio de Salud Publica de Cauca                                                                                                                  | Instituto Nacional de Salud- Dirección de Investigación en Salud Pública                                                                                                                                                                                       | Carlos Franco-Muñoz; Diego A. Álvarez-Díaz; Diego Andrés Prada; Gerardo Santamaría; Hector Alejandro Ruiz-Moreno; Jhonnatán Reales-González; Julian Naizaque; Katherine Laiton-Donato; Magdalena Wiesner; Marcela Mercado-Reyes.; Maria T. Herrera-Sepúlveda; Martha Lucia Ospina Martínez; Sheryll Corchuelo                                                                                                                                                                                             |
| EPI_ISL_1494950                                                                                                                                                                                            | Laboratorio de Salud Publica de Santander                                                                                                              | Instituto Nacional de Salud- Dirección de Investigación en Salud Pública                                                                                                                                                                                       | Carlos Franco-Muñoz; Carmen Osorio; Diana Malo; Diego A. Álvarez-Díaz; Diego Andrés Prada; Gerardo Santamaría; Hector Alejandro Ruiz-Moreno; Jhonnatán Reales-González; Juan Camilo Martínez; Julian Naizaque; Katherine Laiton-Donato; Lisseth Pardo; Magdalena Wiesner; Marcela Mercado-Reyes; Maria T. Herrera-Sepúlveda; Marta Lopez Blanco; Martha Lucia Ospina Martínez; Paola Rojas; Sergio Gomez; Sheryll Corchuelo; Ángela Alarcon Cruz                                                          |
| EPI_ISL_1396071                                                                                                                                                                                            | Laboratorio de Salud Pública                                                                                                                           | Instituto de Patología Vegetal (CIAP-INTA) on behalf of 'Proyecto Argentino Interinstitucional de genómica de SARS-CoV-2' (PAIS Consortium)                                                                                                                    | A. Mariana B. Salmerón; Amadio; Ana Maria Zamora; Dardo E. Costas; Debat, HJ.; FD; Fernández; Graciela Alabarse.; Gustavo Ruiz de Huidobro; Irazoqui, M.; Marquez, N.                                                                                                                                                                                                                                                                                                                                     |
| EPI_ISL_1017701                                                                                                                                                                                            | Laboratorio de Salud Pública de Boyacá                                                                                                                 | Instituto Nacional de Salud- Dirección de Investigación en Salud Pública                                                                                                                                                                                       | Carlos Franco-Muñoz; Diego A. Álvarez-Díaz; Diego Andrés Prada; Gerardo Santamaría; Hector Alejandro Ruiz-Moreno; Jhonnatán Reales-González; Julian Naizaque; Katherine Laiton-Donato; Magdalena Wiesner; Marcela Mercado-Reyes; Maria T. Herrera-Sepúlveda; Martha Lucia Ospina Martínez; Sheryll Corchuelo                                                                                                                                                                                              |
| EPI_ISL_792358, EPI_ISL_792364                                                                                                                                                                             | Laboratorio de Virologia - HIEAyC San Juan de Dios                                                                                                     | Área de Secuenciación del Laboratorio de Virología del Hospital de Niños Dr. Ricardo Gutierrez on behalf of 'Proyecto Argentino Interinstitucional de genómica de SARS-CoV-2' (PAIS Consortium)                                                                | A; Colmeiro; Ercole; Ferioli; Gatelli; Goya; LE; Lusso; M; MI; MS; Nabaes Jodar; Natale; R; S; Valinotto; Viegas, M.                                                                                                                                                                                                                                                                                                                                                                                      |
| EPI_ISL_717860                                                                                                                                                                                             | Laboratorio de Virologia Molecular / UFRJ                                                                                                              | Bioinformatics Laboratory / LNCC                                                                                                                                                                                                                               | Alexandra L Gerber; Amílcar Tanuri; Ana Paula de C Guimarães; Ana Tereza R de Vasconcelos; Andréa Cony Cavalcanti; Carolina M Voloch; Claudia dos Santos Rodrigues; Cynthia C Cardoso; Diana Mariani; Luiz G P de Almeida; Otavio Bustrolini; Ronaldo da Silva F Jr; Terezinha M P P Castiñeira                                                                                                                                                                                                           |
| EPI_ISL_1396251                                                                                                                                                                                            | Laboratorio de Virología del Hospital de Niños Dr. Ricardo Gutierrez                                                                                   | Biocódices SA. on behalf of 'Proyecto Argentino Interinstitucional de genómica de SARS-CoV-2' (PAIS Consortium)                                                                                                                                                | A; Acevedo; Alexay; Alvarez Lopez; Barreda Frank; Berros; C; Dopazo, H.; E; G; Grandis; J.; JM; Jacques; Labarta; M; ME; Medina; Mistchenko; N; O; S; Streitenberger; Thomas; Villegas; Zubrzycki J                                                                                                                                                                                                                                                                                                       |
| EPI_ISL_1395787, EPI_ISL_1396220, EPI_ISL_2007478                                                                                                                                                          | Laboratorio de Virología del Hospital de Niños Dr. Ricardo Gutierrez                                                                                   | Área de Secuenciación del Laboratorio de Virología del Hospital de Niños Dr. Ricardo Gutierrez on behalf of 'Proyecto Argentino Interinstitucional de genómica de SARS-CoV-2' (PAIS Consortium)                                                                | A; Acevedo; Acuña; Alexay; Alvarez Lopez; Barreda Frank; C; D; E; G; Goya; Grandis; Jacques; LE; Labarta; Lusso; M; ME; MI; Medina; Mistchenko; N; Nabaes Jodar; Natale; O; S; Streitenberger; Thomas; Valinotto; Viegas, M.; Villegas                                                                                                                                                                                                                                                                    |
| EPI_ISL_1396112                                                                                                                                                                                            | Laboratorio de Virus Respiratorios y Neurovirosis. Hospital Señor del Milagro                                                                          | Instituto de Patología Vegetal (CIAP-INTA) on behalf of 'Proyecto Argentino Interinstitucional de genómica de SARS-CoV-2' (PAIS Consortium)                                                                                                                    | A. Dra. Raskovsky Viviana; Amadio; Debat, HJ.; Dr. Lavaque Esteban; Dra. Veronica Lesser. Tecnica: Pamela Cajal; FD; Fernanda Agüero.; Fernández; Irazoqui, M.; Marquez, N.                                                                                                                                                                                                                                                                                                                               |
| EPI_ISL_1395789, EPI_ISL_1395798, EPI_ISL_1395799                                                                                                                                                          | Laboratorio del Hospital Interzonal General de Agudos "Evita"                                                                                          | Área de Secuenciación del Laboratorio de Virología del Hospital de Niños Dr. Ricardo Gutierrez on behalf of 'Proyecto Argentino Interinstitucional de genómica de SARS-CoV-2' (PAIS Consortium)                                                                | Acuña; Alejandra Musto; Alexay; D; Erica Luczak; Goya; Isabel Desimone; LE; Lorena Serrano; Lusso; M; MI; Nabaes Jodar; Natale; Omar Grossi; Rubén Pelagamos; S; Valinotto; Viegas, M.                                                                                                                                                                                                                                                                                                                    |
| EPI_ISL_1396334                                                                                                                                                                                            | Laboratorio del Hospital Regional Ushuaia Gdor. Ernesto Campos                                                                                         | Nodo de Secuenciación Tierra del Fuego - Hospital Regional Ushuaia - Centro Austral De Investigaciones Científicas - Universidad Nacional De Tierra Del Fuego on behalf of 'Proyecto Argentino Interinstitucional de genómica de SARS-CoV-2' (PAIS Consortium) | Alejandro Ezequiel Rojas; Carina Andrea De Roccis; Carolina Beatriz Yulan; Cristina Fernanda Nardi; Fernando Gallego; Gabriel Alejandro Castro; Ivan Dario Gramundi; Manuel Fabian Boutoureira; Santiago Guillermo Ceballos; Silvana Beatriz Cáceres                                                                                                                                                                                                                                                      |
| EPI_ISL_2467938                                                                                                                                                                                            | Laboratory for HIV and opportunistic infections diagnosis The Republican Research and Practical Center for Epidemiology and Microbiology (RRPCEM)      | Laboratory for HIV and opportunistic infections diagnosis The Republican Research and Practical Center for Epidemiology and Microbiology (RRPCEM)                                                                                                              | Alina Drozd; Artur Akhremchuk; Elena Gasich; Hanna Gudel; Katsiaryna Belyakova; Kirill Bulda; Leonid Valentovich; Nastassia Kabankova                                                                                                                                                                                                                                                                                                                                                                     |
| EPI_ISL_1138899, EPI_ISL_1209407, EPI_ISL_1508895, EPI_ISL_2080973                                                                                                                                         | Laboratory for HIV and opportunistic infections diagnosis The Republican Research and Practical Center for Epidemiology and Microbiology (RRPCEM)      | Laboratory for HIV and opportunistic infections diagnosis The Republican Research and Practical Center for Epidemiology and Microbiology (RRPCEM)                                                                                                              | Alena Mikhalenka; Alexander Kilchevsky; Alina Drozd; Anatoly Krasko; Anna Gudel; Artur Akhremchuk; Elena Gasich; Katsiaryna Belyakova; Kirill Bulda; Leonid Valentovich; Nastassia Kabankova; Vladimir Gorbunov; Yauhen Sysaliatsin                                                                                                                                                                                                                                                                       |
| EPI_ISL_435047, EPI_ISL_2546901                                                                                                                                                                            | Laboratory of Applied Genetics<br>Laboratory of Communicable Diseases                                                                                  | RSE "National Center for Biotechnology"<br>1. Laboratory of Communicable Diseases (Estonia); 2. Eurofins Genomics Europe Sequencing GmbH                                                                                                                       | Alexandr Shevtsov; Asylulan Amirgazin; Ilyas Akhmetolayev; Ruslan Kalendar; Viktoriya Lutsay; Yerlan Ramanculov<br>Liidia Dotsenko et al.                                                                                                                                                                                                                                                                                                                                                                 |
| EPI_ISL_1716736, EPI_ISL_2301723                                                                                                                                                                           | Laboratory of Immunohematology, Division of Hematology                                                                                                 | Greek Genome Center, Biomedical Research Foundation of the Academy of Athens (BRFAA)                                                                                                                                                                           | Athanasia Mouzaki; Dimitrios Thanos; Emmanouil Athanasiadis; Giannis Vatsellas; Ioannis Vatsellas; Katerina Zoi; Theodoros Loupis                                                                                                                                                                                                                                                                                                                                                                         |
| EPI_ISL_434478                                                                                                                                                                                             | Laboratory of Microbiology, Medical School, National and Kapodistrian University of Athens                                                             | Laboratory of Biology, Department of Medicine, Democritus University of Thrace                                                                                                                                                                                 | Bampali, M.; Dovrolis, N.; Froukala, E.; Gatzidou, E.; Kassela K.; N. and Karakasiliotis, I.; Spanakis; Stavropoulou, A.; Tsakris, A.; Veletza, S.                                                                                                                                                                                                                                                                                                                                                        |
| EPI_ISL_2301773, EPI_ISL_2312609                                                                                                                                                                           | Laboratory of Molecular Biology, Mamatsio General Hospital of Kozani                                                                                   | Greek Genome Center, Biomedical Research Foundation of the Academy of Athens (BRFAA)                                                                                                                                                                           | Dimitrios Thanos; Emmanouil Athanasiadis; Giannis Vatsellas; Katerina Zoi; Konstantina Gartzonika; Theodoros Loupis                                                                                                                                                                                                                                                                                                                                                                                       |
| EPI_ISL_2235248                                                                                                                                                                                            | Laboratory of Molecular Biology, Mamatsio General Hospital of Kozani                                                                                   | Institute of Applied Biosciences, Centre for Research and Technology Hellas                                                                                                                                                                                    | Anastasia Chatzidimitriou et al.                                                                                                                                                                                                                                                                                                                                                                                                                                                                          |
| EPI_ISL_801676                                                                                                                                                                                             | Laboratory of Molecular Virology, Pontificia Universidad Católica de Chile                                                                             | MSHS Pathogen Surveillance Program                                                                                                                                                                                                                             | Adolfo Garcia-Sastre; Adriana van De Guchte; Ajay Obla; Ana Maria Contreras; Ana S. Gonzalez-Reiche; Bremy Albuquerque; Carlos Palma; Constanza Maldonado; Edward C. Holmes; Eileen Serrano; Erick Salinas; Hala Alshammmary; Harm van Bakel; Jayeeta Dutta; Jorge Levican; Juan Soto; Leonardo I. Almonacid; M. Belen Leyton; Marcela Ferres; Matthew M. Hernandez; Melissa Smith; Rafael A. Medina.; Robert Sebra; Shwetha Hara Sridhar; Tamara García-Salum; Viviana Simon; Ying-Chih Wang; Zenab Khan |

|                                                                                                                                                                                                                                                                                                                                                                                                                                                                                                                                                                                                                                                                                                                                                                                                                                                                                                                                                                                                                                                                                                                                                                                                                                                                                                                                                                                                                                                                                                                                                                                                                                                                                                                                                                                                                                                                                                                          |                                                                                |                                                                                                                                   |                                                                                                                                                                                                                                                                                                                                                                                                                                                                              |                                                                                                                                                                            |
|--------------------------------------------------------------------------------------------------------------------------------------------------------------------------------------------------------------------------------------------------------------------------------------------------------------------------------------------------------------------------------------------------------------------------------------------------------------------------------------------------------------------------------------------------------------------------------------------------------------------------------------------------------------------------------------------------------------------------------------------------------------------------------------------------------------------------------------------------------------------------------------------------------------------------------------------------------------------------------------------------------------------------------------------------------------------------------------------------------------------------------------------------------------------------------------------------------------------------------------------------------------------------------------------------------------------------------------------------------------------------------------------------------------------------------------------------------------------------------------------------------------------------------------------------------------------------------------------------------------------------------------------------------------------------------------------------------------------------------------------------------------------------------------------------------------------------------------------------------------------------------------------------------------------------|--------------------------------------------------------------------------------|-----------------------------------------------------------------------------------------------------------------------------------|------------------------------------------------------------------------------------------------------------------------------------------------------------------------------------------------------------------------------------------------------------------------------------------------------------------------------------------------------------------------------------------------------------------------------------------------------------------------------|----------------------------------------------------------------------------------------------------------------------------------------------------------------------------|
| EPI_ISL_1341150, EPI_ISL_1341381, EPI_ISL_1341504, EPI_ISL_1341641, EPI_ISL_1365638, EPI_ISL_1365743, EPI_ISL_1489929                                                                                                                                                                                                                                                                                                                                                                                                                                                                                                                                                                                                                                                                                                                                                                                                                                                                                                                                                                                                                                                                                                                                                                                                                                                                                                                                                                                                                                                                                                                                                                                                                                                                                                                                                                                                    | see above                                                                      | Laboratory of Virology, National center of expertise                                                                              | RSE "National Center of Expertise" and RSE "National center for Biotechnology"                                                                                                                                                                                                                                                                                                                                                                                               | Abdalyev Askar; Amirgazin Asyulan; Balykbaev Kanat; Kamalova Dinara; Ramankulov Erlan; Sharipova Saule; Shevtsov Alexandr; Tungushbayev Talgat                             |
| EPI_ISL_454575                                                                                                                                                                                                                                                                                                                                                                                                                                                                                                                                                                                                                                                                                                                                                                                                                                                                                                                                                                                                                                                                                                                                                                                                                                                                                                                                                                                                                                                                                                                                                                                                                                                                                                                                                                                                                                                                                                           | Laboratory of virology, National Center of Expertise                           | Laboratory of molecular-genetic research, National Center for Expertise, Kazakhstan National Center for Biotechnology, Kazakhstan |                                                                                                                                                                                                                                                                                                                                                                                                                                                                              | ; Abdalyev Askar; Akhmetollayev Ilyas; Amirgazin Asyulan; Aushakhmetova Zabira; Kalender Ruslan; Lutsay Viktoriya; Rakhmetova Akbota; Ramankulov Yerlan; Shevtsov Alexandr |
| EPI_ISL_454585                                                                                                                                                                                                                                                                                                                                                                                                                                                                                                                                                                                                                                                                                                                                                                                                                                                                                                                                                                                                                                                                                                                                                                                                                                                                                                                                                                                                                                                                                                                                                                                                                                                                                                                                                                                                                                                                                                           | Laboratory of virology, National Center of Expertise                           | Laboratory of molecular-genetic research, National Center for Expertise, Kazakhstan National Center for Biotechnology, Kazakhstan |                                                                                                                                                                                                                                                                                                                                                                                                                                                                              | ; Abdalyev Askar; Akhmetollayev Ilyas; Amirgazin Asyulan; Aushakhmetova Zabira; Kalender Ruslan; Lutsay Viktoriya; Rakhmetova Akbota; Ramankulov Yerlan; Shevtsov Alexandr |
| EPI_ISL_454590                                                                                                                                                                                                                                                                                                                                                                                                                                                                                                                                                                                                                                                                                                                                                                                                                                                                                                                                                                                                                                                                                                                                                                                                                                                                                                                                                                                                                                                                                                                                                                                                                                                                                                                                                                                                                                                                                                           | Laboratory of virology, National Center of Expertise                           | Laboratory of molecular-genetic research, National Center of Expertise, Kazakhstan National Center for Biotechnology, Kazakhstan  |                                                                                                                                                                                                                                                                                                                                                                                                                                                                              | ; Abdalyev Askar; Akhmetollayev Ilyas; Amirgazin Asyulan; Aushakhmetova Zabira; Kalender Ruslan; Lutsay Viktoriya; Rakhmetova Akbota; Ramankulov Yerlan; Shevtsov Alexandr |
| EPI_ISL_1334580, EPI_ISL_1364621, EPI_ISL_1364864, EPI_ISL_1448018, EPI_ISL_1448020                                                                                                                                                                                                                                                                                                                                                                                                                                                                                                                                                                                                                                                                                                                                                                                                                                                                                                                                                                                                                                                                                                                                                                                                                                                                                                                                                                                                                                                                                                                                                                                                                                                                                                                                                                                                                                      | Laboratory of virology, National center of expertise                           | RSE "National Center for Biotechnology" and RSE "National Center of Expertise"                                                    |                                                                                                                                                                                                                                                                                                                                                                                                                                                                              | Abdalyev Askar; Amirgazin Asyulan; Balykbaev Kanat; Kamalova Dinara; Ramankulov Yerlan; Sharipova Saule; Shevtsov Alexandr; Tungushbayev Talgat                            |
| EPI_ISL_2308475                                                                                                                                                                                                                                                                                                                                                                                                                                                                                                                                                                                                                                                                                                                                                                                                                                                                                                                                                                                                                                                                                                                                                                                                                                                                                                                                                                                                                                                                                                                                                                                                                                                                                                                                                                                                                                                                                                          | Laboratório Central de Saúde Pública de Sergipe                                | Coordenação Geral de Laboratórios de Saúde Pública (CGLAB/DAEVS/SVS/MS)                                                           |                                                                                                                                                                                                                                                                                                                                                                                                                                                                              | Vagner Fonseca; et al.                                                                                                                                                     |
| EPI_ISL_792589, EPI_ISL_792613                                                                                                                                                                                                                                                                                                                                                                                                                                                                                                                                                                                                                                                                                                                                                                                                                                                                                                                                                                                                                                                                                                                                                                                                                                                                                                                                                                                                                                                                                                                                                                                                                                                                                                                                                                                                                                                                                           | Laboratório Central de Saúde Pública do Estado da Paraíba (LACEN-PB)           | Laboratory of Respiratory Viruses and Measles, Oswaldo Cruz Institute, FIOCRUZ                                                    | Ana Carolina Mendonça; Anna Carolina Paixão; Dalane Louda Florentino Teixeira; Fernando Motta; João Felipe Bezerra; Luciana Appolinario; Marilda Siqueira on behalf of the FioCruz COVID-19 Genomic Surveillance Network; Paola Resende; Romero Henrique Teixeira de Vasconcelos; Thiago Franco de Oliveira Carneiro                                                                                                                                                         |                                                                                                                                                                            |
| EPI_ISL_729813                                                                                                                                                                                                                                                                                                                                                                                                                                                                                                                                                                                                                                                                                                                                                                                                                                                                                                                                                                                                                                                                                                                                                                                                                                                                                                                                                                                                                                                                                                                                                                                                                                                                                                                                                                                                                                                                                                           | Laboratório Central de Saúde Pública do Estado do Rio Grande do Sul (LACEN-RS) | Laboratory of Respiratory Viruses and Measles, Oswaldo Cruz Institute, FIOCRUZ                                                    | Ana Carolina Mendonça; Anna Carolina Paixão; Fernando Motta; Luciana Appolinario; Marilda Siqueira on behalf of the FioCruz COVID-19 Genomic Surveillance Network; Marilda Tereza Mar da Rosa; Paola Resende; Tatiana Schaffer Gregianini                                                                                                                                                                                                                                    |                                                                                                                                                                            |
| EPI_ISL_2248765                                                                                                                                                                                                                                                                                                                                                                                                                                                                                                                                                                                                                                                                                                                                                                                                                                                                                                                                                                                                                                                                                                                                                                                                                                                                                                                                                                                                                                                                                                                                                                                                                                                                                                                                                                                                                                                                                                          | Laboratório Central de Saúde Pública do Pará                                   | Coordenação Geral de Laboratórios de Saúde Pública (CGLAB/DAEVS/SVS/MS)                                                           |                                                                                                                                                                                                                                                                                                                                                                                                                                                                              | Vagner Fonseca; et al.                                                                                                                                                     |
| EPI_ISL_2158599                                                                                                                                                                                                                                                                                                                                                                                                                                                                                                                                                                                                                                                                                                                                                                                                                                                                                                                                                                                                                                                                                                                                                                                                                                                                                                                                                                                                                                                                                                                                                                                                                                                                                                                                                                                                                                                                                                          | Laboratório de Biologia Molecular Jean Piaget                                  | MRCAT at LSHTM, Genomics lab                                                                                                      | Abdoulie Kanthe; Abdul Karim Sesay; Adul Candé; Aicha Balde; Aladjie Balde; Bakary Sanyang; Bubacar Delgado Pinto Embalo; Dabiri Damilari; Edmira Maria da Costa; Erica Luis Maria Magalhães; Faatu Cassama; Mariama Kujabi; Milanca Agostinho Cá; Paulina Joaozinho da Costa Jarra Manneh; Rei José Pereira; Rui Indu; Sainabou Laye Ndure; Simão Tchuda Bioté                                                                                                              |                                                                                                                                                                            |
| EPI_ISL_79166                                                                                                                                                                                                                                                                                                                                                                                                                                                                                                                                                                                                                                                                                                                                                                                                                                                                                                                                                                                                                                                                                                                                                                                                                                                                                                                                                                                                                                                                                                                                                                                                                                                                                                                                                                                                                                                                                                            | Laboratório de Microbiologia Molecular - Universidade FEEVALE                  | Bioinformatics Laboratory / LNCC                                                                                                  | Alana Witt Hansen; Alessandra Pavan Lamarca da Silva; Alexandra L Gerber; Ana Luiza Ziulkoski; Ana Karolina Eisen Antunes; Ana Paula de C Guimarães; Ana Tereza R de Vasconcelos; Bruna Hermann; Fagner Henrique Heldt; Felipe Benites; Fernando Rosado Spilki; Juliana Schons; Juliane Deise Fleck; Karoline Schallenberg; Larissa Mallmann; Luiz G P de Almeida; Matheus Nunes Weber; Meriane Demoliner; Paula Rodrigues de Almeida; Ronaldo da Silva F Jr; Vycctoria Goes |                                                                                                                                                                            |
| EPI_ISL_2375797, EPI_ISL_2431436                                                                                                                                                                                                                                                                                                                                                                                                                                                                                                                                                                                                                                                                                                                                                                                                                                                                                                                                                                                                                                                                                                                                                                                                                                                                                                                                                                                                                                                                                                                                                                                                                                                                                                                                                                                                                                                                                         | Laboratório de Microbiologia Molecular - Universidade FEEVALE                  | Molecular Microbiology Laboratory                                                                                                 | Alana Witt Hansen; Fernando Rosado Spilki; Flávio Silveira; Fágner Henrique Heldt; Juliana Schons Gualarte; Juliane Deise Fleck; Mariana Soares da Silva; Matheus Nunes Weber; Meriane Demoliner; Micheli Filippi; Paula Rodrigues de Almeida                                                                                                                                                                                                                                |                                                                                                                                                                            |
| EPI_ISL_1216917, EPI_ISL_2120258, EPI_ISL_2760396                                                                                                                                                                                                                                                                                                                                                                                                                                                                                                                                                                                                                                                                                                                                                                                                                                                                                                                                                                                                                                                                                                                                                                                                                                                                                                                                                                                                                                                                                                                                                                                                                                                                                                                                                                                                                                                                        | Labormedizin Darmstadt                                                         | Robert Koch Institute                                                                                                             |                                                                                                                                                                                                                                                                                                                                                                                                                                                                              |                                                                                                                                                                            |
| EPI_ISL_1973556                                                                                                                                                                                                                                                                                                                                                                                                                                                                                                                                                                                                                                                                                                                                                                                                                                                                                                                                                                                                                                                                                                                                                                                                                                                                                                                                                                                                                                                                                                                                                                                                                                                                                                                                                                                                                                                                                                          | Labormedizinisches Zentrum Dr Risch                                            | Clinical Bacteriology                                                                                                             | Adrian Egli; Alfredo Mar; Hans Hirsch; Helena MB Seth-Smith; Julia Bielicki; Karoline Leuzinger; Lorenz Risch; Madlen Stange; Manuel Battegay; Martin Risch; Nadia Wohlwend; Tim Roloff                                                                                                                                                                                                                                                                                      |                                                                                                                                                                            |
| EPI_ISL_1233663                                                                                                                                                                                                                                                                                                                                                                                                                                                                                                                                                                                                                                                                                                                                                                                                                                                                                                                                                                                                                                                                                                                                                                                                                                                                                                                                                                                                                                                                                                                                                                                                                                                                                                                                                                                                                                                                                                          | Labormedizinisches Zentrum Dr Risch                                            | University Hospital Basel, Clinical Bacteriology                                                                                  | Adrian Egli; Alfredo Mar; Hans Hirsch; Helena MB Seth-Smith; Julia Bielicki; Karoline Leuzinger; Lorenz Risch; Madlen Stange; Manuel Battegay; Martin Risch; Nadia Wohlwend; Tim Roloff                                                                                                                                                                                                                                                                                      |                                                                                                                                                                            |
| EPI_ISL_2614379                                                                                                                                                                                                                                                                                                                                                                                                                                                                                                                                                                                                                                                                                                                                                                                                                                                                                                                                                                                                                                                                                                                                                                                                                                                                                                                                                                                                                                                                                                                                                                                                                                                                                                                                                                                                                                                                                                          | Laboratório Central de Saúde Pública do Estado do Rio de Janeiro (LACEN/RJ)    | Laboratory of Respiratory Viruses and Measles, Oswaldo Cruz Institute, FIOCRUZ                                                    | Alice Sampaio Rocha; Ana Carolina Mendonça; Andrea Cony Cavalcanti; Anna Carolina Paixão; Elisa Cavalcante Pereira; Fernando Motta; Luciana Appolinario; Marilda Siqueira on behalf of the FioCruz COVID-19 Genomic Surveillance Network; Paola Resende; Renata Serrano Lopes; Taina Venas                                                                                                                                                                                   |                                                                                                                                                                            |
| EPI_ISL_1941367, EPI_ISL_1941374, EPI_ISL_1941376, EPI_ISL_2614390                                                                                                                                                                                                                                                                                                                                                                                                                                                                                                                                                                                                                                                                                                                                                                                                                                                                                                                                                                                                                                                                                                                                                                                                                                                                                                                                                                                                                                                                                                                                                                                                                                                                                                                                                                                                                                                       | Landesamt für Verbraucherschutz Sachsen Anhalt, Magdeburg                      | Institute of Medical Microbiology and Hospital Hygiene                                                                            |                                                                                                                                                                                                                                                                                                                                                                                                                                                                              | Alojsha Tersteegen; Prof. Dr. Achim Kaasch                                                                                                                                 |
| EPI_ISL_2760184, EPI_ISL_2761652                                                                                                                                                                                                                                                                                                                                                                                                                                                                                                                                                                                                                                                                                                                                                                                                                                                                                                                                                                                                                                                                                                                                                                                                                                                                                                                                                                                                                                                                                                                                                                                                                                                                                                                                                                                                                                                                                         | Landesgesundheitsamt Baden-Württemberg                                         | Robert Koch Institute                                                                                                             |                                                                                                                                                                                                                                                                                                                                                                                                                                                                              |                                                                                                                                                                            |
| EPI_ISL_812277                                                                                                                                                                                                                                                                                                                                                                                                                                                                                                                                                                                                                                                                                                                                                                                                                                                                                                                                                                                                                                                                                                                                                                                                                                                                                                                                                                                                                                                                                                                                                                                                                                                                                                                                                                                                                                                                                                           | Landstuhl Regional Medical Center                                              | United States Air Force School of Aerospace Medicine                                                                              | Amanda Javorina; Anthony Fries; Clarisse Starr; Cole Anderson; Elizabeth Macias; Fritz Castillo; Jennifer Meyer; Sarah Purves; William Gruner                                                                                                                                                                                                                                                                                                                                |                                                                                                                                                                            |
| EPI_ISL_2443545                                                                                                                                                                                                                                                                                                                                                                                                                                                                                                                                                                                                                                                                                                                                                                                                                                                                                                                                                                                                                                                                                                                                                                                                                                                                                                                                                                                                                                                                                                                                                                                                                                                                                                                                                                                                                                                                                                          | Laboratório Central de Saúde Pública do Estado do Paraná (LACEN/PR)            | Laboratory of Respiratory Viruses and Measles, Oswaldo Cruz Institute, FIOCRUZ                                                    | Alice Sampaio Rocha; Ana Carolina Mendonça; Anna Carolina Paixão; Elisa Cavalcante Pereira; Fernando Motta; Irina Riediger; Luciana Appolinario; Marilda Siqueira on behalf of the FioCruz COVID-19 Genomic Surveillance Network; Paola Resende; Renata Serrano Lopes; Taina Venas                                                                                                                                                                                           |                                                                                                                                                                            |
| EPI_ISL_2521701                                                                                                                                                                                                                                                                                                                                                                                                                                                                                                                                                                                                                                                                                                                                                                                                                                                                                                                                                                                                                                                                                                                                                                                                                                                                                                                                                                                                                                                                                                                                                                                                                                                                                                                                                                                                                                                                                                          | Libramont                                                                      | Plateforme de testing Namuroise                                                                                                   | Degossier Jonathan; Demars Aurore; Denis Olivier; Lesly Nyinkeu Kemamen; Maschietto Céline; Mullier François; Nobis Chloé; Otto Gaetan                                                                                                                                                                                                                                                                                                                                       |                                                                                                                                                                            |
| EPI_ISL_1188862, EPI_ISL_1536300, EPI_ISL_1584529, EPI_ISL_1631042, EPI_ISL_1652724, EPI_ISL_1652738, EPI_ISL_1652761, EPI_ISL_1652763, EPI_ISL_1652850, EPI_ISL_1652890, EPI_ISL_1653187, EPI_ISL_1698227, EPI_ISL_1698319, EPI_ISL_1698325, EPI_ISL_1698416, EPI_ISL_1698440, EPI_ISL_1698543, EPI_ISL_1699101, EPI_ISL_1700038, EPI_ISL_1700236, EPI_ISL_1718381, EPI_ISL_1718501, EPI_ISL_1718588, EPI_ISL_1718589, EPI_ISL_1718597, EPI_ISL_1718598, EPI_ISL_1718630, EPI_ISL_1718683, EPI_ISL_1718721, EPI_ISL_1718772, EPI_ISL_1718777, EPI_ISL_1718882, EPI_ISL_1719616, EPI_ISL_1740606, EPI_ISL_1740616, EPI_ISL_1740707, EPI_ISL_1740750, EPI_ISL_1740763, EPI_ISL_1740778, EPI_ISL_1740819, EPI_ISL_1741186, EPI_ISL_1758301, EPI_ISL_1758376, EPI_ISL_1758890, EPI_ISL_1759190, EPI_ISL_1759274, EPI_ISL_1790461, EPI_ISL_1790538, EPI_ISL_1790547, EPI_ISL_1790596, EPI_ISL_1790745, EPI_ISL_1790771, EPI_ISL_1790809, EPI_ISL_1790900, EPI_ISL_1805965, EPI_ISL_1806511, EPI_ISL_1806521, EPI_ISL_1806550, EPI_ISL_1806561, EPI_ISL_1806659, EPI_ISL_1806670, EPI_ISL_1806695, EPI_ISL_1806837, EPI_ISL_1806846, EPI_ISL_1806852, EPI_ISL_1829212, EPI_ISL_1829220, EPI_ISL_1829233, EPI_ISL_1829237, EPI_ISL_1829254, EPI_ISL_1829258, EPI_ISL_1829279, EPI_ISL_1829281, EPI_ISL_1829282, EPI_ISL_1829360, EPI_ISL_1829362, EPI_ISL_1829413, EPI_ISL_1829430, EPI_ISL_1829440, EPI_ISL_1829458, EPI_ISL_1829818, EPI_ISL_1829838, EPI_ISL_1829839, EPI_ISL_1829843, EPI_ISL_1829854, EPI_ISL_1829860, EPI_ISL_1829878, EPI_ISL_1829914, EPI_ISL_1829930, EPI_ISL_1829964, EPI_ISL_1829966, EPI_ISL_1829979, EPI_ISL_1829983, EPI_ISL_1830064, EPI_ISL_1830065, EPI_ISL_1830077, EPI_ISL_1830080, EPI_ISL_1830356, EPI_ISL_1830348, EPI_ISL_1830349, EPI_ISL_1830354, EPI_ISL_1830358, EPI_ISL_1830359, EPI_ISL_1830371, EPI_ISL_1830372, EPI_ISL_1830373, EPI_ISL_1830374, EPI_ISL_1830375, EPI_ISL_1830 |                                                                                |                                                                                                                                   |                                                                                                                                                                                                                                                                                                                                                                                                                                                                              |                                                                                                                                                                            |

[illegible]



|                                                                                                                                                                                                                                                                                                                                                                                                                                                                                                                                                                                                                                                                                                                                                           |                                                                                                                                                                                  |                                                                                                                                                                                         |                                                                                                                                                                                                                                                                                                                                                                                                                                                                                                                                                                                                     |                                                                                                                                                                                                                                                                                                                                                                                                          |
|-----------------------------------------------------------------------------------------------------------------------------------------------------------------------------------------------------------------------------------------------------------------------------------------------------------------------------------------------------------------------------------------------------------------------------------------------------------------------------------------------------------------------------------------------------------------------------------------------------------------------------------------------------------------------------------------------------------------------------------------------------------|----------------------------------------------------------------------------------------------------------------------------------------------------------------------------------|-----------------------------------------------------------------------------------------------------------------------------------------------------------------------------------------|-----------------------------------------------------------------------------------------------------------------------------------------------------------------------------------------------------------------------------------------------------------------------------------------------------------------------------------------------------------------------------------------------------------------------------------------------------------------------------------------------------------------------------------------------------------------------------------------------------|----------------------------------------------------------------------------------------------------------------------------------------------------------------------------------------------------------------------------------------------------------------------------------------------------------------------------------------------------------------------------------------------------------|
| EPI_IS1_1347416, EPI_IS1_2380495                                                                                                                                                                                                                                                                                                                                                                                                                                                                                                                                                                                                                                                                                                                          | Medical Laboratories Duesseldorf                                                                                                                                                 | Center of Medical Microbiology, Virology, and Hospital Hygiene, University of Duesseldorf                                                                                               | Alexander Dilthey; Andreas Walker; Angelika Helmer; Christian Lange; Daniel Strelow; Jessica Nicolai; Jörg Timm; Klaus Pfeffer; Lisanna Hülse; Malte Kohns Vasconcelos; Maximilian Damagnez; Nadine Lübke; Tobias Wienemann; Torsten Houwaart                                                                                                                                                                                                                                                                                                                                                       |                                                                                                                                                                                                                                                                                                                                                                                                          |
| EPI_ISL_1302579                                                                                                                                                                                                                                                                                                                                                                                                                                                                                                                                                                                                                                                                                                                                           | Medicina practica laboratorija                                                                                                                                                   | Lithuanian University of Health Sciences Hospital, Department of Genetics and Molecular Medicine                                                                                        | Astra Vitkauskienė; Darius Cereskevicius; Inga Nasvytienė; Mantas Sarauskas; Marius Sukys; Rasa Ugenskiene; Renaldas Jurkevicius; Zilvė Zemeckienė                                                                                                                                                                                                                                                                                                                                                                                                                                                  |                                                                                                                                                                                                                                                                                                                                                                                                          |
| EPI_ISL_2471770, EPI_ISL_2762825                                                                                                                                                                                                                                                                                                                                                                                                                                                                                                                                                                                                                                                                                                                          | Medizinisch-Diagnostisches Labor Kempten allgäulab                                                                                                                               | Robert Koch Institute                                                                                                                                                                   |                                                                                                                                                                                                                                                                                                                                                                                                                                                                                                                                                                                                     |                                                                                                                                                                                                                                                                                                                                                                                                          |
| EPI_ISL_2116115                                                                                                                                                                                                                                                                                                                                                                                                                                                                                                                                                                                                                                                                                                                                           | Medizinische Laboratorien Dusseldorf                                                                                                                                             | Robert Koch Institute                                                                                                                                                                   |                                                                                                                                                                                                                                                                                                                                                                                                                                                                                                                                                                                                     |                                                                                                                                                                                                                                                                                                                                                                                                          |
| EPI_ISL_2348499                                                                                                                                                                                                                                                                                                                                                                                                                                                                                                                                                                                                                                                                                                                                           | Megalab, Molecular and Cytogenetics Diagnostics                                                                                                                                  | Department for Virology, Molecular Biology and Genome Research, R. G. Lugar Center for Public Health Research, National Center for Disease Control and Public Health (NCDC) of Georgia. | Adam Kotorashvili; Amiran Gamkrelidze.; Ana Pakpiari; Ann Machablishvili; Anna Kasradze; Davit Tsaguria; Ekaterine Khmaladze; Ekaterine Zangaladze; Ekaterine Zhghenti; Giorgi Gogoladze; Giorgi Tomashvili; Gvantsa Brachvili; Gvantsa Chanturia; Irma Burjanadze; Ketevan Sidamonidze; Khutuna Zakhashvili; Lela Sabadze; Lela Urushadze; Magda Dgebadze; Magda Alkhashashvili; Mari Gavashelidze; Mariam Zakalashvili; Marine Murtskhvaladze; Meri Pantsulaia; Nato Kotaria; Nino Berishvili; Nino Chikhovani; Paata Imnadze; Roena Sukhashvili; Tamar Jashiasvili; Tata Imnadze; Tea Tvedoradze |                                                                                                                                                                                                                                                                                                                                                                                                          |
| EPI_ISL_562729, EPI_ISL_564958, EPI_ISL_1249986, EPI_ISL_1249990, EPI_ISL_1249999, EPI_ISL_1250002, EPI_ISL_1250005, EPI_ISL_1913109, EPI_ISL_1913110, EPI_ISL_1913174, EPI_ISL_2379270, EPI_ISL_2379278, EPI_ISL_2379289, EPI_ISL_2379290, EPI_ISL_2379291, EPI_ISL_2405346, EPI_ISL_2405349, EPI_ISL_2405350, EPI_ISL_2405353, EPI_ISL_2482436, EPI_ISL_2482442, EPI_ISL_2482447, EPI_ISL_2482451, EPI_ISL_2482454, EPI_ISL_2482459, EPI_ISL_2482460                                                                                                                                                                                                                                                                                                    | see above                                                                                                                                                                        | Microbiological Diagnostic Unit - Public Health Laboratory (MDU-PHL)                                                                                                                    | MDU-PHL                                                                                                                                                                                                                                                                                                                                                                                                                                                                                                                                                                                             |                                                                                                                                                                                                                                                                                                                                                                                                          |
| EPI_ISL_2621569, EPI_ISL_2621572                                                                                                                                                                                                                                                                                                                                                                                                                                                                                                                                                                                                                                                                                                                          | Microbiological Diagnostic Unit - Public Health Laboratory (MDU-PHL)                                                                                                             | Microbiological Diagnostic Unit - Public Health Laboratory (MDU-PHL)                                                                                                                    | M.L.; N.L.; Salt; Sait, M.; Schultz M. B.; Seemann T.; Seemann, T.; Sherry; Sherry, N.                                                                                                                                                                                                                                                                                                                                                                                                                                                                                                              |                                                                                                                                                                                                                                                                                                                                                                                                          |
| EPI_ISL_2250223, EPI_ISL_2250224, EPI_ISL_2250225, EPI_ISL_2250232                                                                                                                                                                                                                                                                                                                                                                                                                                                                                                                                                                                                                                                                                        | Microbiological Diagnostic Unit - Public Health Laboratory (MDU-PHL)                                                                                                             | Microbiological Diagnostic Unit Public Health Laboratory (MDU-PHL)                                                                                                                      | M.L.; N.L.; Salt; Seemann T.; Sherry                                                                                                                                                                                                                                                                                                                                                                                                                                                                                                                                                                |                                                                                                                                                                                                                                                                                                                                                                                                          |
| EPI_ISL_427077                                                                                                                                                                                                                                                                                                                                                                                                                                                                                                                                                                                                                                                                                                                                            | Microbiological Diagnostic Unit Public Health Laboratory                                                                                                                         | Microbiological Diagnostic Unit Public Health Laboratory                                                                                                                                | Sait, M.; Schultz M.; Seemann T.; Sherry, N.                                                                                                                                                                                                                                                                                                                                                                                                                                                                                                                                                        |                                                                                                                                                                                                                                                                                                                                                                                                          |
| EPI_ISL_2131838, EPI_ISL_2132223                                                                                                                                                                                                                                                                                                                                                                                                                                                                                                                                                                                                                                                                                                                          | Microbiology Department, Lu'an Center for Disease Control and Prevention                                                                                                         | Microbiology Department, Lu'an Center for Disease Control and Prevention                                                                                                                | Chang Hongwei; Chen Beilei; Chen Zhichao; Fan Yuzhen.; Gao Dawei; Li Zhaoyang; Yang Wei; Zhang Feng; Zhang Limei; Zhang Qin; Zhu Rui                                                                                                                                                                                                                                                                                                                                                                                                                                                                |                                                                                                                                                                                                                                                                                                                                                                                                          |
| EPI_ISL_2362674, EPI_ISL_2362675, EPI_ISL_2362678, EPI_ISL_2362680, EPI_ISL_2362683, EPI_ISL_2362684, EPI_ISL_2362686                                                                                                                                                                                                                                                                                                                                                                                                                                                                                                                                                                                                                                     | see above                                                                                                                                                                        | Microbiology and Virology Unit, Florence Careggi University Hospital                                                                                                                    | Alberto Antonelli; Emanuele Gori; Fabio Morecchiato; Gian Maria Rossolini; Ilaria Baccani; Marco Coppi; Nicla Giovacchini; Noemi Aiezza; Vincenzo Di Pilato                                                                                                                                                                                                                                                                                                                                                                                                                                         |                                                                                                                                                                                                                                                                                                                                                                                                          |
| EPI_ISL_1181801                                                                                                                                                                                                                                                                                                                                                                                                                                                                                                                                                                                                                                                                                                                                           | Microbiology and Virology Unit,Azienda Ospedale Padova,Padova,Italy                                                                                                              | Department of Molecular Medicine,Computational Medicine Group,University of Padova,Padova,Italy                                                                                         | Andrea Crisanti; Claudia Del Vecchio; Elisa Franchin; Enrico Lavezzo; Federico Bianca; Francesco Onelia; Laura Manuto; Marco Grazioli; Stefano Toppo                                                                                                                                                                                                                                                                                                                                                                                                                                                |                                                                                                                                                                                                                                                                                                                                                                                                          |
| EPI_ISL_2348487                                                                                                                                                                                                                                                                                                                                                                                                                                                                                                                                                                                                                                                                                                                                           | Middle East Institute of Health University Hospital                                                                                                                              | Microbial Pathogenomics Lab - LAU                                                                                                                                                       | Edmond Abboud; Georgi Merhi; Jad Koweyes; Sima Tokajian                                                                                                                                                                                                                                                                                                                                                                                                                                                                                                                                             |                                                                                                                                                                                                                                                                                                                                                                                                          |
| EPI_ISL_2603843                                                                                                                                                                                                                                                                                                                                                                                                                                                                                                                                                                                                                                                                                                                                           | Ministry of Health, Jaber Al-Ahmad Hospital                                                                                                                                      | Virology Unit, Department of Microbiology, Faculty of Medicine, Kuwait University                                                                                                       | Anfal Al-Adwani; Ebaa Al-Awadhi; Hussain Safar; Nada Madi                                                                                                                                                                                                                                                                                                                                                                                                                                                                                                                                           |                                                                                                                                                                                                                                                                                                                                                                                                          |
| EPI_ISL_1634442                                                                                                                                                                                                                                                                                                                                                                                                                                                                                                                                                                                                                                                                                                                                           | Mitra Kasih Hospital                                                                                                                                                             | West Java Health Laboratory; School of Life Sciences and Technology, Institut Teknologi Bandung                                                                                         | Aulia Saraswati Wicaksono; Azzania Fibriani; Cut Nur Cinthia Alamanda; Ema Rahmawati; Karimatu Khoirunnisa; Miftahul Faridi; Rifky Waluyajati Rachman; Rini Robiani; Ryan Bayusantika Ristandi                                                                                                                                                                                                                                                                                                                                                                                                      |                                                                                                                                                                                                                                                                                                                                                                                                          |
| EPI_ISL_2101098                                                                                                                                                                                                                                                                                                                                                                                                                                                                                                                                                                                                                                                                                                                                           | Molecular Biology Laboratory, Faculty Medicine and Health Sciences, Warmadewa University                                                                                         | Eijkman Institute for Molecular Biology, National Agency for Research and Innovation; Molecular Biology Laboratory, Faculty Medicine and Health Sciences, Warmadewa University          | Amin Soebandrio; Edison Johar; Eryl Sintya; Frilasita A Yudhaputri; Hidayat Trimarsanto; Iskandar Adnan; Khin Saw Myint; Lidwina Priliani; Lydia V. Panggalo; Muhammad Rezki Rasyak; Safarina G Malik; Sri Masyeni; Sukma Oktavianthi; Willy Agustine                                                                                                                                                                                                                                                                                                                                               |                                                                                                                                                                                                                                                                                                                                                                                                          |
| EPI_ISL_1993548                                                                                                                                                                                                                                                                                                                                                                                                                                                                                                                                                                                                                                                                                                                                           | Molecular Diagnostic Laboratory (Hormozghan University of Medical Sciences)                                                                                                      | National Influenza Center                                                                                                                                                               | A Nejadi; F Ajaminejad and T Mokhtari Azad; J Yavarian; K Sadeghi; N Ghavvami; NZ Shafiei Jandaghi; V Salimi                                                                                                                                                                                                                                                                                                                                                                                                                                                                                        |                                                                                                                                                                                                                                                                                                                                                                                                          |
| EPI_ISL_2350812                                                                                                                                                                                                                                                                                                                                                                                                                                                                                                                                                                                                                                                                                                                                           | Molecular Lab, Evercare hospital Dhaka                                                                                                                                           | International Institute for Zoonosis Control, Hokkaido university                                                                                                                       | Junya Yamagishi; Mizanur Rahman                                                                                                                                                                                                                                                                                                                                                                                                                                                                                                                                                                     |                                                                                                                                                                                                                                                                                                                                                                                                          |
| EPI_ISL_895786                                                                                                                                                                                                                                                                                                                                                                                                                                                                                                                                                                                                                                                                                                                                            | Molecular biology division, Institute of Clinical Biochemistry and Diagnostics, Charles University, Faculty of Medicine in Hradec Králové and University Hospital Hradec Králové | Molecular biology division, Institute of Clinical Biochemistry and Diagnostics, Charles University, Faculty of Medicine in Hradec Králové and University Hospital Hradec Králové        | Helena Kovářková; Ivana Baranová; Jitka Novotná; Kateřina Hrochová; Kateřina Pehlíková; Petr Brož; Tereza Baťková; Vladimír Palíčka. Cooperation project with BioVendor-R&D and bioinformatics company BIOXSYS s r.o.                                                                                                                                                                                                                                                                                                                                                                               |                                                                                                                                                                                                                                                                                                                                                                                                          |
| EPI_ISL_1367682, EPI_ISL_1367691, EPI_ISL_1367694, EPI_ISL_1663657, EPI_ISL_1663659, EPI_ISL_1663666, EPI_ISL_1663668, EPI_ISL_1663671, EPI_ISL_1663674, EPI_ISL_1663677, EPI_ISL_1663679                                                                                                                                                                                                                                                                                                                                                                                                                                                                                                                                                                 | see above                                                                                                                                                                        | Molecular diagnostic unit for viral haemorrhagic fevers and emerging viruses, Bouaké CHU Laboratory                                                                                     | Adjaratou Traoré; Bamba Fatoumata Touré; Chantal Akoua-Koffi; Coulibaly Mbegnan; Diané Bamourou; Essia Belarbi; Etilé Anoh; Fabian Leendertz; Grit Schubert; Kra Ouffoué; Monemo Pacome; Oby Wayoro; Safiatou Karidioula; Soundélé Maïté                                                                                                                                                                                                                                                                                                                                                            |                                                                                                                                                                                                                                                                                                                                                                                                          |
| EPI_ISL_614347, EPI_ISL_614394, EPI_ISL_681842, EPI_ISL_1662592                                                                                                                                                                                                                                                                                                                                                                                                                                                                                                                                                                                                                                                                                           | Molecular diagnostic unit for viral haemorrhagic fevers and emerging viruses, Bouaké CHU Laboratory                                                                              | Project group Epidemiology of Highly Pathogenic Microorganisms, Robert Koch-Institute                                                                                                   | Adjaratou Traoré; Bamba Fatoumata Touré; Chantal Akoua-Koffi; Coulibaly Mbegnan; Diané Bamourou; Essia Belarbi; Etilé Anoh; Fabian Leendertz; Grit Schubert; Kra Ouffoué; Monemo Pacome; Safiatou Karidioula; Soundélé Maïté                                                                                                                                                                                                                                                                                                                                                                        |                                                                                                                                                                                                                                                                                                                                                                                                          |
| EPI_ISL_1865437                                                                                                                                                                                                                                                                                                                                                                                                                                                                                                                                                                                                                                                                                                                                           | Molekylær Medicinsk Afdeling, Aarhus University Hospital, Aarhus, Denmark                                                                                                        | Aalborg University                                                                                                                                                                      | Danish Covid-19 Genome Consortium                                                                                                                                                                                                                                                                                                                                                                                                                                                                                                                                                                   |                                                                                                                                                                                                                                                                                                                                                                                                          |
| EPI_ISL_2426098, EPI_ISL_2429125                                                                                                                                                                                                                                                                                                                                                                                                                                                                                                                                                                                                                                                                                                                          | Mubarak Al-Kabeer Hospital                                                                                                                                                       | Virology Unit, Department of Microbiology, Faculty of Medicine, Kuwait University                                                                                                       | Anfal Al-Adwani; Hussain Safar; Nada Madi                                                                                                                                                                                                                                                                                                                                                                                                                                                                                                                                                           |                                                                                                                                                                                                                                                                                                                                                                                                          |
| EPI_ISL_2429129                                                                                                                                                                                                                                                                                                                                                                                                                                                                                                                                                                                                                                                                                                                                           | Mubarak Al-Kabeer Hospital                                                                                                                                                       | Virology Unit, Department of Microbiology, Faculty of Medicine, Kuwait University                                                                                                       | Anfal Al-Adwani; Hussain Safar; Nada Madi                                                                                                                                                                                                                                                                                                                                                                                                                                                                                                                                                           |                                                                                                                                                                                                                                                                                                                                                                                                          |
| EPI_ISL_2017761, EPI_ISL_2017762, EPI_ISL_2391477, EPI_ISL_2391478, EPI_ISL_2391481, EPI_ISL_2391482, EPI_ISL_2391483, EPI_ISL_2391484, EPI_ISL_2391486, EPI_ISL_2391487, EPI_ISL_2405118, EPI_ISL_2405119, EPI_ISL_2405120, EPI_ISL_2405121, EPI_ISL_2405122, EPI_ISL_2405123, EPI_ISL_2509934, EPI_ISL_2509935, EPI_ISL_2509936, EPI_ISL_2509937, EPI_ISL_2509939, EPI_ISL_2509940, EPI_ISL_2509942, EPI_ISL_2509943, EPI_ISL_2509944, EPI_ISL_2509945, EPI_ISL_2509946, EPI_ISL_2509949, EPI_ISL_2509950, EPI_ISL_2509951, EPI_ISL_2509952, EPI_ISL_2509953, EPI_ISL_2509954, EPI_ISL_2509955, EPI_ISL_2509956, EPI_ISL_2543891, EPI_ISL_2543892, EPI_ISL_2543893, EPI_ISL_2543894, EPI_ISL_2543895, EPI_ISL_2543896, EPI_ISL_2543897, EPI_ISL_2543898 | see above                                                                                                                                                                        | N.H.L Municipal Medical College, Ahmedabad<br>Gujarat Biotechnology Research Centre                                                                                                     | Chaitanya Joshi; Dinesh Kumar; Janvi Raval; Jayshri Pethani; Madhvi Joshi; Nitesh Shah; Nitin Savaliya; Ramesh Pandit; Sonal Sharma; Twinkle Soni; Umang Mishra; Zarna Patel; Zuber Saiyed                                                                                                                                                                                                                                                                                                                                                                                                          |                                                                                                                                                                                                                                                                                                                                                                                                          |
| EPI_ISL_1588070, EPI_ISL_1588074, EPI_ISL_1588081, EPI_ISL_1588264, EPI_ISL_1588269, EPI_ISL_2550561, EPI_ISL_2550569, EPI_ISL_2550589, EPI_ISL_2550605                                                                                                                                                                                                                                                                                                                                                                                                                                                                                                                                                                                                   | see above                                                                                                                                                                        | NB-Hôpital Georges L. Dumont                                                                                                                                                            | National Microbiology Laboratory (NML)                                                                                                                                                                                                                                                                                                                                                                                                                                                                                                                                                              | Anna Majer; Anneliese Landgraff; CanCOGeN's metadata curation team; Darian Hole; Elsie Grudeski; Gary Van Domselaar; Grace Seo; Guillaume Desnoyers; Jennifer Tanner; Kirsten Biggar; Madison Chapel; Morag Graham; Natalie Knox; Nathalie Bastien; Philip Mabon; Public Health Agency of Canada CanCOGeN team; Rhiannon Huzarewich; Richard Garceau; Russell Mandes; Shari Tyson; Timothy Booth; Yan Li |
| EPI_ISL_1663366, EPI_ISL_1663367, EPI_ISL_1663375, EPI_ISL_1663376, EPI_ISL_2341673, EPI_ISL_2341791, EPI_ISL_2342630, EPI_ISL_2342642, EPI_ISL_2342644, EPI_ISL_2342656, EPI_ISL_2342722, EPI_ISL_2342919, EPI_ISL_2342930, EPI_ISL_2342931, EPI_ISL_2342932, EPI_ISL_2342937, EPI_ISL_2342938, EPI_ISL_2342946, EPI_ISL_2342947, EPI_ISL_2342953, EPI_ISL_2342956, EPI_ISL_2342964                                                                                                                                                                                                                                                                                                                                                                      | see above                                                                                                                                                                        | NCCS, Pune<br>Institute of Life Sciences - INSACOG                                                                                                                                      | Ajay Parida; Amol M. Kanampalliwar; Arup Ghosh; Atimukta Jha; INSACOG Consortium; Omprakash Shiriwas; Punit Prasad; Rajeeb Swain; Rupesh Dash; Safal Wallia; Sana Fatma; Shifu Aggarwal; Sunil K. Raghav Chowdhury, M.; H.U.; Haider; Hasan; Hosen; K.N.; Khaleque, A.; Khan; Khan, M.; M.B.; M.F.A.; M.H.; M.I.; Rabbi; Rahman, M.; Razu; Sufian, A.                                                                                                                                                                                                                                               |                                                                                                                                                                                                                                                                                                                                                                                                          |
| EPI_ISL_854982                                                                                                                                                                                                                                                                                                                                                                                                                                                                                                                                                                                                                                                                                                                                            | NGS Lab, DNA SOLUTION LTD.                                                                                                                                                       | NGS Lab, DNA SOLUTION LTD.                                                                                                                                                              |                                                                                                                                                                                                                                                                                                                                                                                                                                                                                                                                                                                                     |                                                                                                                                                                                                                                                                                                                                                                                                          |
| EPI_ISL_420037                                                                                                                                                                                                                                                                                                                                                                                                                                                                                                                                                                                                                                                                                                                                            | NIC Viral Respiratory Unit - Institut Pasteur of Algeria                                                                                                                         | National Reference Center for Viruses of Respiratory Infections, Institut Pasteur, Paris                                                                                                | Angela Brisebarre; Etienne Simon-Lorriere; Fawzi Derrar; Flora Donati; Marion Barbet; Maud Vanpeene; Mélanie Albert; Méline Bizard; Sylvie Behillili; Sylvie van der Werf; Vincent Enouf                                                                                                                                                                                                                                                                                                                                                                                                            |                                                                                                                                                                                                                                                                                                                                                                                                          |
| EPI_ISL_2379357, EPI_ISL_2450328, EPI_ISL_2450329, EPI_ISL_2450334, EPI_ISL_2450339, EPI_ISL_2728444, EPI_ISL_2728455, EPI_ISL_2728456, EPI_ISL_2728480, EPI_ISL_2728484, EPI_ISL_2728485, EPI_ISL_2728486, EPI_ISL_2728495, EPI_ISL_2728496, EPI_ISL_2728500, EPI_ISL_2728504, EPI_ISL_2728505, EPI_ISL_2728507, EPI_ISL_2728509, EPI_ISL_2728510, EPI_ISL_2728511, EPI_ISL_2728512, EPI_ISL_2728513, EPI_ISL_2728514, EPI_ISL_2728515, EPI_ISL_2728516, EPI_ISL_2728517, EPI_ISL_2728518, EPI_ISL_2728519, EPI_ISL_2728520, EPI_ISL_2728521, EPI_ISL_2728522                                                                                                                                                                                            | see above                                                                                                                                                                        | NIMHANS<br>INSACOG-KA, NIMHANS                                                                                                                                                          | Ananthapadmanabha Kotambail; Anita S Desai; Anson Kunjumon George; Chetan G K; Chitra Pattabiraman; Darshan Sreenivas; Ellango Ramasamy; Gautham Arunachal Udipi; Mahesh Kumar.C.S; Pramada Prasad; Sony Sharma; V Ravi                                                                                                                                                                                                                                                                                                                                                                             |                                                                                                                                                                                                                                                                                                                                                                                                          |
| EPI_ISL_1939986, EPI_ISL_1939987, EPI_ISL_1939999, EPI_ISL_1940055, EPI_ISL_1940057, EPI_ISL_1940095, EPI_ISL_1940096, EPI_ISL_1940097, EPI_ISL_1940099, EPI_ISL_1940107, EPI_ISL_1940108, EPI_ISL_1940133, EPI_ISL_1940134                                                                                                                                                                                                                                                                                                                                                                                                                                                                                                                               | see above                                                                                                                                                                        | NIMHANS<br>inStem NCBS - INSACOG                                                                                                                                                        | Uma Ramakrishnan Dasaradhi Palakodeti Aswin SaiNarain                                                                                                                                                                                                                                                                                                                                                                                                                                                                                                                                               |                                                                                                                                                                                                                                                                                                                                                                                                          |
| EPI_ISL_1278177, EPI_ISL_1278185, EPI_ISL_1587827, EPI_ISL_1587878, EPI_ISL_1587899, EPI_ISL_1587903, EPI_ISL_2161784, EPI_ISL_2161797, EPI_ISL_2484596, EPI_ISL_2484610, EPI_ISL_2484613, EPI_ISL_2484620, EPI_ISL_2484640, EPI_ISL_2484644                                                                                                                                                                                                                                                                                                                                                                                                                                                                                                              | see above                                                                                                                                                                        | NL-Dr. Leonard A. Miller Centre for Health Services<br>National Microbiology Laboratory (NML)                                                                                           | Adel Malek; Anna Majer; Anneliese Landgraff; CanCOGeN's metadata curation team; Darian Hole; Elsie Grudeski; Gary Van Domselaar; George Zahariadis; Grace Seo; Jennifer Tanner; Kerri Smith; Kirsten Biggar; Laura Gilbert; Madison Chapel; Morag Graham; Natalie Knox; Nathalie Bastien; Philip Mabon; Public Health Agency of Canada CanCOGeN team; Rhiannon Huzarewich; Robert Needle; Russell Mandes; Shari Tyson; Timothy Booth; Yan Li; Yang Yu                                                                                                                                               |                                                                                                                                                                                                                                                                                                                                                                                                          |
| EPI_ISL_1579578                                                                                                                                                                                                                                                                                                                                                                                                                                                                                                                                                                                                                                                                                                                                           | NMVRVI                                                                                                                                                                           | National Public Health Surveillance Laboratory                                                                                                                                          | Ana Steponkieniė; Danas Baksa; Jelena Razmuk; Lukas Vasionis; Lukas Zemaitys; Migle Gabrielaite; Svajune Muralyte                                                                                                                                                                                                                                                                                                                                                                                                                                                                                   |                                                                                                                                                                                                                                                                                                                                                                                                          |
| EPI_ISL_1666863, EPI_ISL_1666941, EPI_ISL_2162072, EPI_ISL_2162120                                                                                                                                                                                                                                                                                                                                                                                                                                                                                                                                                                                                                                                                                        | NS-QEII Health Sciences Centre                                                                                                                                                   | National Microbiology Laboratory (NML)                                                                                                                                                  | Anna Majer; Anneliese Landgraff; CanCOGeN's metadata curation team; Dan Gaston; Darian Hole; Elsie Grudeski; Gary Van Domselaar; Grace Seo; Janice Pettipas; Jason LeBlanc; Jennifer Tanner; Kirsten Biggar; Madison Chapel; Morag Graham; Natalie Knox; Nathalie Bastien; Philip Mabon; Public Health Agency of Canada CanCOGeN team; Rhiannon Huzarewich; Russell Mandes; Shari Tyson; Timothy Booth; Todd Hatchette; Yan Li                                                                                                                                                                      |                                                                                                                                                                                                                                                                                                                                                                                                          |
| EPI_ISL_2445121                                                                                                                                                                                                                                                                                                                                                                                                                                                                                                                                                                                                                                                                                                                                           | NUCLEO DE ESPECIALIDADES EM SAUDE                                                                                                                                                | Instituto Butantan                                                                                                                                                                      | Antonio Jorge Martins; Claudia Renata dos Santos Barros; David Schlesinger; Debora Botequio Moretti; Dimas Tadeu Covas; Elaine Cristina Marquenze; Elaine Vieira Santos; Evandra Strazza Rodrigues; Heidge Fukumasu; Jayme Augusto de Souza-Neto; José Salvatore Leister Patané; Luiz Alcantara; Luiz Lehmann Coutinho; Maria Carolina Elias; Mauricio Lacerda Nogueira; Rafael dos Santos Bezerra; Raul Machado Neto; Rejane Maria Tommasini Grotto; Ricardo Haddad; Sandra Coccuzzo Sampaio Vessoni; Simone Kashima; Svetoslav Nanev Slavov; Vincent Louis Viala                                  |                                                                                                                                                                                                                                                                                                                                                                                                          |
| EPI_ISL_1654649                                                                                                                                                                                                                                                                                                                                                                                                                                                                                                                                                                                                                                                                                                                                           | NMVRVI                                                                                                                                                                           | National Public Health Surveillance Laboratory                                                                                                                                          | Ana Steponkieniė; Danas Baksa; Jelena Razmuk; Lukas Vasionis; Lukas Zemaitys; Migle Gabrielaite; Svajune Muralyte                                                                                                                                                                                                                                                                                                                                                                                                                                                                                   |                                                                                                                                                                                                                                                                                                                                                                                                          |
| EPI_ISL_1579921                                                                                                                                                                                                                                                                                                                                                                                                                                                                                                                                                                                                                                                                                                                                           | NVSP                                                                                                                                                                             | National Public Health Surveillance Laboratory                                                                                                                                          | Ana Steponkieniė; Danas Baksa; Jelena Razmuk; Lukas Vasionis; Lukas Zemaitys; Migle Gabrielaite; Svajune Muralyte                                                                                                                                                                                                                                                                                                                                                                                                                                                                                   |                                                                                                                                                                                                                                                                                                                                                                                                          |
| EPI_ISL_1718282, EPI_ISL_1718287, EPI_ISL_1718291, EPI_ISL_1718299, EPI_ISL_1718303, EPI_ISL_1718304                                                                                                                                                                                                                                                                                                                                                                                                                                                                                                                                                                                                                                                      | National Center of Disease Control and Prevention of the Republic of Armenia                                                                                                     | Institute of Molecular Biology NAS RA, Republic of Armenia, Department of Bioengineering, BioinformaticsInstitute and Molecular Biology IBMPH RAU, Republic of Armenia                  | Andranik Chavushyan; Arsen Arakelyan; Diana Avetyan; Gayane Melik-Pashayan; Gisane Khachatyan; Hovsep Ghazaryan; Maria Nikoghossyan; Nelli Muradyan; Roksana Zakharyan; Shushan Sargsryan; Siras Hakobyan; Tamara Sirunyan; Zaven Karalyan                                                                                                                                                                                                                                                                                                                                                          |                                                                                                                                                                                                                                                                                                                                                                                                          |

[illegible]

|                                                                                                                                                                                                                                                                                                                                                                                                                                                                                                                                                                                                                                                                                                                                                                                                                                                                                                                                                                                                                                                                                                                                                                                                                                                                                                                                                                                                                                                 |                                                                                                                                                  |                                                                                                                                                                                                                     |                                                                                                                                                                                                                                                                                                                                                                                                                                                                                                            |
|-------------------------------------------------------------------------------------------------------------------------------------------------------------------------------------------------------------------------------------------------------------------------------------------------------------------------------------------------------------------------------------------------------------------------------------------------------------------------------------------------------------------------------------------------------------------------------------------------------------------------------------------------------------------------------------------------------------------------------------------------------------------------------------------------------------------------------------------------------------------------------------------------------------------------------------------------------------------------------------------------------------------------------------------------------------------------------------------------------------------------------------------------------------------------------------------------------------------------------------------------------------------------------------------------------------------------------------------------------------------------------------------------------------------------------------------------|--------------------------------------------------------------------------------------------------------------------------------------------------|---------------------------------------------------------------------------------------------------------------------------------------------------------------------------------------------------------------------|------------------------------------------------------------------------------------------------------------------------------------------------------------------------------------------------------------------------------------------------------------------------------------------------------------------------------------------------------------------------------------------------------------------------------------------------------------------------------------------------------------|
| EPI_ISL_1910219, EPI_ISL_1910228                                                                                                                                                                                                                                                                                                                                                                                                                                                                                                                                                                                                                                                                                                                                                                                                                                                                                                                                                                                                                                                                                                                                                                                                                                                                                                                                                                                                                | National Institute for Food and Veterinary Risk Assessment (NMVRVI)                                                                              | National Public Health Surveillance Laboratory                                                                                                                                                                      | Mildred Adjese-Poku; Sharon Hsu; Thushan I de Silva; William K. Ampofo<br>Ana Steponkiene; Danas Baksa; Jelena Razmuk; Lukas Vasionis; Lukas Zemaits; Migle Gabrielaite; Svajune Muralyte                                                                                                                                                                                                                                                                                                                  |
| EPI_ISL_469255<br>EPI_ISL_408481                                                                                                                                                                                                                                                                                                                                                                                                                                                                                                                                                                                                                                                                                                                                                                                                                                                                                                                                                                                                                                                                                                                                                                                                                                                                                                                                                                                                                | National Institute for Viral Disease Control and Prevention, China CDC<br>National Institute for Viral Disease Control and Prevention, China CDC | Institute of Viral Disease Control and Prevention, China CDC<br>National Institute for Viral Disease Control & Prevention, CCDC                                                                                     | Chun Huang; Dayan Wang; George F. Gao; Guizhen Wu; Jun Han; Shiwen Wang; Weifeng Shi; Wenbo Xu; William J. Liu; Xiang Zhao , Lijuan Chen; Yanhai Wang; Yao Meng , Zhixiao Chen , Yuchao Wu; Yong Zhang<br>Baoying Huang; Fei Ye; George F. Gao; Guizhen Wu; Hengqin Wang; Li Zhao; Peihua Niu; Roujian Lu; Sheng Ye; Wenbo Xu; Wenjie Tan; Wenling Wang; Xiang Zhao                                                                                                                                        |
| EPI_ISL_850946, EPI_ISL_850950                                                                                                                                                                                                                                                                                                                                                                                                                                                                                                                                                                                                                                                                                                                                                                                                                                                                                                                                                                                                                                                                                                                                                                                                                                                                                                                                                                                                                  | National Institute for Viral Disease Control and Prevention, China CDC                                                                           | National Institute for Viral Disease Control and Prevention, China CDC                                                                                                                                              | Cao Chen; Dayan Wang; Ji Wang; Jun Han; Kai Nie; Shiwen Wang; Weimin Zhou; Wenbo Xu; Wenjie Tan; Xiang Zhao; Yang Song; Yanhai Wang; Yao Meng; Yanan Feng; Yong Zhang; Yuchao Wu; Zhixiao Chen                                                                                                                                                                                                                                                                                                             |
| EPI_ISL_1824609, EPI_ISL_1915521, EPI_ISL_1915538                                                                                                                                                                                                                                                                                                                                                                                                                                                                                                                                                                                                                                                                                                                                                                                                                                                                                                                                                                                                                                                                                                                                                                                                                                                                                                                                                                                               | National Institute of Health Research and Development                                                                                            | National Institute of Health Research and Development                                                                                                                                                               | Agustinsinghi; Arie Ardiansyah Nugraha; Fauzul Muna; Hana Apasari Pawestri; Hartanti Dian Ikwati; Herna; Holy Arif Wibowo; Irene Lorinda Indalao; Kartika Dewi Puspa; Kindi Adam; Krisna Nur Andriana Pangesti; Natalie Laurencia Kipuwi; Nelly Puspandari; Ni Ketut Susilarini; Nike Susanti; Nurika Hariastuti; Reni Herman; Rinin Ramadhany; Subangkit; Tati Febriyanti; Triyanti Soekarso; Ulyi Alfi Nikmah; Vivi Setiawaty.; Yuni Rukminiati                                                          |
| EPI_ISL_1509924, EPI_ISL_1531555, EPI_ISL_1531561, EPI_ISL_2433937, EPI_ISL_2467942                                                                                                                                                                                                                                                                                                                                                                                                                                                                                                                                                                                                                                                                                                                                                                                                                                                                                                                                                                                                                                                                                                                                                                                                                                                                                                                                                             | National Institute of Laboratory Medicine and Referral Center                                                                                    | Genomic Research Lab, BCSIR                                                                                                                                                                                         | A. K. M. Shamsuzzaman; Abu Sayeed Mohammad Mahmud; Arifa Akram; Asish Kumar Ghosh; Barna Goswami; Eshrar Osman; Iffat Jahan; Mahmuda Yeasmin; Md. Ahasan Habib; Md. Kamrul Islam; Md. Maruf Ahmed Molla; Md. Murshed Hasan Sarkar; Md. Saddam Hossain; Md. Salim Khan; Mohammad Mohi Uddin; Mohammad Samir Uzzaman; Shahina Akter; Tanjina Akhter Banu; Tasnim Nafisa                                                                                                                                      |
| EPI_ISL_1588472, EPI_ISL_2420841                                                                                                                                                                                                                                                                                                                                                                                                                                                                                                                                                                                                                                                                                                                                                                                                                                                                                                                                                                                                                                                                                                                                                                                                                                                                                                                                                                                                                | National Institute of Public Health                                                                                                              | National Institute of Public Health                                                                                                                                                                                 | Alexander Nagy; Dusan Trnka; Helena Jirincova; Jaromira Vecerova; Timotej Suri                                                                                                                                                                                                                                                                                                                                                                                                                             |
| EPI_ISL_2357744, EPI_ISL_2562068, EPI_ISL_2562069, EPI_ISL_2562070, EPI_ISL_2562071, EPI_ISL_2562072, EPI_ISL_2562073, EPI_ISL_2620893, EPI_ISL_2620894, EPI_ISL_2620895, EPI_ISL_2620896, EPI_ISL_2620897, EPI_ISL_2674220                                                                                                                                                                                                                                                                                                                                                                                                                                                                                                                                                                                                                                                                                                                                                                                                                                                                                                                                                                                                                                                                                                                                                                                                                     | see above                                                                                                                                        | National Institute of Public Health                                                                                                                                                                                 | A. Cernikov; D; H; J; Jirincova; L; M; Nagy; Stara; Suri; T; Trnka; Vecerova                                                                                                                                                                                                                                                                                                                                                                                                                               |
| EPI_ISL_2301430, EPI_ISL_2304141, EPI_ISL_2304142, EPI_ISL_2304143, EPI_ISL_2483841, EPI_ISL_2483846, EPI_ISL_2545435, EPI_ISL_2545447, EPI_ISL_2545452, EPI_ISL_2545453, EPI_ISL_2545454, EPI_ISL_2545461, EPI_ISL_2545470, EPI_ISL_2545473, EPI_ISL_2548370, EPI_ISL_2548539, EPI_ISL_2549196, EPI_ISL_2687944, EPI_ISL_2687960, EPI_ISL_2687968, EPI_ISL_2687977, EPI_ISL_2756206, EPI_ISL_2756208, EPI_ISL_2756210, EPI_ISL_2756211, EPI_ISL_2756216, EPI_ISL_2756217, EPI_ISL_2756218, EPI_ISL_2784722                                                                                                                                                                                                                                                                                                                                                                                                                                                                                                                                                                                                                                                                                                                                                                                                                                                                                                                                     | see above                                                                                                                                        | National Platform bis UMONS/Jolimont                                                                                                                                                                                | Eric Tarantino; Florian Juszcak; François Dufrasne; Gautier Detry; Guillaume Bayon-Vicente; Ruddy Wattiez                                                                                                                                                                                                                                                                                                                                                                                                  |
| EPI_ISL_1095617, EPI_ISL_1195207, EPI_ISL_1447312, EPI_ISL_1447313, EPI_ISL_1447314                                                                                                                                                                                                                                                                                                                                                                                                                                                                                                                                                                                                                                                                                                                                                                                                                                                                                                                                                                                                                                                                                                                                                                                                                                                                                                                                                             | National Public Health Center, COVID Laboratory                                                                                                  | National Public Health Center, National Biosafety Laboratory                                                                                                                                                        | Bernadett Pályi; Dániel Déri; Judit Henczkó; Norbert Solymosi; Nóra Magyar; Zoltán Kis                                                                                                                                                                                                                                                                                                                                                                                                                     |
| EPI_ISL_845561, EPI_ISL_845565                                                                                                                                                                                                                                                                                                                                                                                                                                                                                                                                                                                                                                                                                                                                                                                                                                                                                                                                                                                                                                                                                                                                                                                                                                                                                                                                                                                                                  | National Public Health Laboratory, Cameroon                                                                                                      | African Centre of Excellence for Genomics of Infectious Diseases (ACEGID), Redeemer's University                                                                                                                    | Oluniyi P.E. et al                                                                                                                                                                                                                                                                                                                                                                                                                                                                                         |
| EPI_ISL_1122419, EPI_ISL_1122420, EPI_ISL_1122421                                                                                                                                                                                                                                                                                                                                                                                                                                                                                                                                                                                                                                                                                                                                                                                                                                                                                                                                                                                                                                                                                                                                                                                                                                                                                                                                                                                               | National Public Health Laboratory, National Centre for Infectious Diseases                                                                       | National Virology Reference Laboratory                                                                                                                                                                              | Lin Cui; Raymond Tzer Pin Lin; Surita Taib; Tze Minn Mak; Zainun Zaini; Zhenyang Zhou                                                                                                                                                                                                                                                                                                                                                                                                                      |
| EPI_ISL_1921165, EPI_ISL_1921288, EPI_ISL_1921739, EPI_ISL_1921764, EPI_ISL_1921765, EPI_ISL_1921768                                                                                                                                                                                                                                                                                                                                                                                                                                                                                                                                                                                                                                                                                                                                                                                                                                                                                                                                                                                                                                                                                                                                                                                                                                                                                                                                            | National Public Health Organization                                                                                                              | Institute of Applied Biosciences, Centre for Research and Technology Hellas                                                                                                                                         | Anastasia Chatzidimitriou et al.                                                                                                                                                                                                                                                                                                                                                                                                                                                                           |
| EPI_ISL_1273391, EPI_ISL_1273392, EPI_ISL_1273394                                                                                                                                                                                                                                                                                                                                                                                                                                                                                                                                                                                                                                                                                                                                                                                                                                                                                                                                                                                                                                                                                                                                                                                                                                                                                                                                                                                               | National Reference Laboratory - Ministry of Health Maseru Lesotho                                                                                | National Institute for Communicable Diseases of the National Health Laboratory Service                                                                                                                              | Amoako DG; Banda R; Bhiman JN; Gorova V; Ismail A; Mahlangu B; Mathabo M; Mohale T; Mooko M; Ntuli N; Scheepers C                                                                                                                                                                                                                                                                                                                                                                                          |
| EPI_ISL_625683, EPI_ISL_833578                                                                                                                                                                                                                                                                                                                                                                                                                                                                                                                                                                                                                                                                                                                                                                                                                                                                                                                                                                                                                                                                                                                                                                                                                                                                                                                                                                                                                  | National Reference Laboratory for COVID-19, Pasteur Institute of Iran                                                                            | National Reference Laboratory for COVID-19, Pasteur Institute of Iran                                                                                                                                               | Ahmad Ghasemi; Farideh Niknam; Heasam Nemati; Hessam Nemati; Kayhan Azadmanesh; Mahsa Tavakkoli; Mahsa Tavakoli; Maryam Rostamtabar; Marzieh Sadjadi; Marzieh Sajjadi; Mohammad Sadegh Shams Nosrati; Mohammad Hassan Pouriayevali; Mohammad Mehdi Mortazavipour; Mostafa Salehi-Vaziri; Parastoo Yekta; Sahar Khakifrouz; Sana Eybpoosh; Sanam Azad-Manjiri; Sepideh Gerdooei; Setareh Kashanian; Tahereh Mohammadi; Tahmineh Jalali; Zabihollah Shoja; Zahra Ahmadi; Zahra Fereydouni; Zeynab VeisiZadeh |
| EPI_ISL_435675<br>EPI_ISL_605063, EPI_ISL_605069                                                                                                                                                                                                                                                                                                                                                                                                                                                                                                                                                                                                                                                                                                                                                                                                                                                                                                                                                                                                                                                                                                                                                                                                                                                                                                                                                                                                | National Virology Reference Laboratory<br>National Virus Reference Laboratory                                                                    | National Public Health Laboratory, National Centre for Infectious Diseases<br>Irish Coronavirus Sequencing Consortium - Helixworks                                                                                  | Chavatte Jean-Marc; Cui Lin; Lin Raymond Tzer Pin; Mak Tze Minn; Octavia Sophie; Taib Surita; Zaini Zainun<br>Conor Crosbie; Nimesh Pinnamaneni; Sachin Chhalapati                                                                                                                                                                                                                                                                                                                                         |
| EPI_ISL_578322, EPI_ISL_1191342, EPI_ISL_1398743, EPI_ISL_1398857, EPI_ISL_1500021, EPI_ISL_1577403, EPI_ISL_1620440, EPI_ISL_1651763, EPI_ISL_1731106, EPI_ISL_1731198, EPI_ISL_1731252, EPI_ISL_1731330, EPI_ISL_1785273, EPI_ISL_1785341, EPI_ISL_1890977, EPI_ISL_1890990, EPI_ISL_1904652, EPI_ISL_1904670, EPI_ISL_1904703, EPI_ISL_1904829, EPI_ISL_1904838, EPI_ISL_1911144, EPI_ISL_1960669, EPI_ISL_1960691, EPI_ISL_1960795, EPI_ISL_1960834, EPI_ISL_1960854, EPI_ISL_1972662, EPI_ISL_1972667, EPI_ISL_1972679, EPI_ISL_1972682, EPI_ISL_1972731, EPI_ISL_1972735, EPI_ISL_1972737, EPI_ISL_1972739, EPI_ISL_1972740, EPI_ISL_1972833, EPI_ISL_2029129, EPI_ISL_2029134, EPI_ISL_2029136, EPI_ISL_2029137, EPI_ISL_2029173, EPI_ISL_2029174, EPI_ISL_2029353, EPI_ISL_2029354, EPI_ISL_2087953, EPI_ISL_2088054, EPI_ISL_2088086, EPI_ISL_2131943, EPI_ISL_2131950, EPI_ISL_2132109, EPI_ISL_2132111, EPI_ISL_2132155, EPI_ISL_2139904, EPI_ISL_2139922, EPI_ISL_2240843, EPI_ISL_2240930, EPI_ISL_2284223, EPI_ISL_2284263, EPI_ISL_2284264, EPI_ISL_2284339, EPI_ISL_2284347, EPI_ISL_2284369, EPI_ISL_2284371, EPI_ISL_2284378, EPI_ISL_2284388, EPI_ISL_2363015, EPI_ISL_2363324, EPI_ISL_2363328, EPI_ISL_2363379, EPI_ISL_2363380, EPI_ISL_2455018, EPI_ISL_2533392, EPI_ISL_2533454, EPI_ISL_2601108, EPI_ISL_2601113, EPI_ISL_2601114, EPI_ISL_2601116, EPI_ISL_2601119, EPI_ISL_2601122, EPI_ISL_2601124, EPI_ISL_2710640 | see above                                                                                                                                        | National Virus Reference Laboratory                                                                                                                                                                                 | Calum Walsh; Charlene Bennet; Charlene Bennett; Cillian F De Gascun; Fiona Crispie; Gabriel Gonzalez; Guerrero Macori; Jonathan Dean; Matthew McCabe; Michael Carr; Paul Cotter; Seamus Fanning; Suzie Coughlan; Zoe Yandle                                                                                                                                                                                                                                                                                |
| EPI_ISL_2533833, EPI_ISL_2533834, EPI_ISL_2533835, EPI_ISL_2533836, EPI_ISL_2533839, EPI_ISL_2533845, EPI_ISL_2533846, EPI_ISL_2533849, EPI_ISL_2533850, EPI_ISL_2533864, EPI_ISL_2533869, EPI_ISL_2533870, EPI_ISL_2533871, EPI_ISL_2533872, EPI_ISL_2533874, EPI_ISL_2533876, EPI_ISL_2533879                                                                                                                                                                                                                                                                                                                                                                                                                                                                                                                                                                                                                                                                                                                                                                                                                                                                                                                                                                                                                                                                                                                                                 | see above                                                                                                                                        | Naval Medical Research Unit No. 3                                                                                                                                                                                   | Andrea E. Luquette; Andrew J. Bennett; Bishwo N. Adhikari; Catherine E. Arnold; Chaselynn M. Watters; Emily K. Stefanov; Francisco Malagon; Kyle A. Long; Logan J. Voegtly; Luis A. Estrella; Michael V. Deschenes; Regina Z. Cer; Stephen M. Eggan; and Kimberly A. Bishop-Lilly                                                                                                                                                                                                                          |
| EPI_ISL_1010709, EPI_ISL_1010714, EPI_ISL_1061034, EPI_ISL_1061036, EPI_ISL_1061037, EPI_ISL_1121977, EPI_ISL_1121978, EPI_ISL_1121982, EPI_ISL_1121984, EPI_ISL_1121985, EPI_ISL_1121988, EPI_ISL_1184094, EPI_ISL_1315066, EPI_ISL_1315070, EPI_ISL_1697280, EPI_ISL_1756027, EPI_ISL_1756028, EPI_ISL_1756030, EPI_ISL_1756032, EPI_ISL_2107443, EPI_ISL_2107459, EPI_ISL_2107499, EPI_ISL_2107500, EPI_ISL_2107504, EPI_ISL_2249257, EPI_ISL_2249258, EPI_ISL_2455226, EPI_ISL_2455227, EPI_ISL_2455228, EPI_ISL_2455229, EPI_ISL_2455230, EPI_ISL_2696274                                                                                                                                                                                                                                                                                                                                                                                                                                                                                                                                                                                                                                                                                                                                                                                                                                                                                  | see above                                                                                                                                        | New South Wales Health Pathology Royal Prince Alfred Hospital<br>Niedersächsisches Landesgesundheitsamt (NLGA)                                                                                                      | Microbiology RPAH<br>Robert Koch Institute<br>Au, J.; Bull, R.; Deveson, I.; Foster, C.; Rawlinson, W.; Ruiz Silva, M.; Van Hal, S.                                                                                                                                                                                                                                                                                                                                                                        |
| EPI_ISL_685307                                                                                                                                                                                                                                                                                                                                                                                                                                                                                                                                                                                                                                                                                                                                                                                                                                                                                                                                                                                                                                                                                                                                                                                                                                                                                                                                                                                                                                  | Niigata Prefectural Institute of Public Health and Environmental Sciences                                                                        | Pathogen Genomics Center, National Institute of Infectious Diseases                                                                                                                                                 | Kentaro Itokawa; Makoto Kuroda; Masanori Hashino; Rina Tanaka; Tsuyoshi Sekizuka                                                                                                                                                                                                                                                                                                                                                                                                                           |
| EPI_ISL_2361921, EPI_ISL_2376384, EPI_ISL_2376385                                                                                                                                                                                                                                                                                                                                                                                                                                                                                                                                                                                                                                                                                                                                                                                                                                                                                                                                                                                                                                                                                                                                                                                                                                                                                                                                                                                               | Noguchi Memorial Institute for Medical Research, University of Ghana, Legon, Ghana                                                               | Institute of Tropical Medicine, Universitätsklinikum Tübingen, Germany                                                                                                                                              | Abraham Kwabena Anang; Bright Adu; Dorothy Yeboah-Manu; Hilda Opoku Frempong; John Kofi Odoom; Joseph Humphrey Kofi Bonney; Joyce Appiah-Kubi; Keren Okyereba Attiku; Le Thi Kieu Linh; Quaneeta Mohktar; Sivaramakrishna Rachakonda; Srinivas-reddy Pallerla; Thirumalaisamy P Velavan                                                                                                                                                                                                                    |
| EPI_ISL_2363940<br>EPI_ISL_2601630                                                                                                                                                                                                                                                                                                                                                                                                                                                                                                                                                                                                                                                                                                                                                                                                                                                                                                                                                                                                                                                                                                                                                                                                                                                                                                                                                                                                              | NordLab Oulu<br>North Estonia Medical Centre                                                                                                     | Expert Microbiology, National Institute for Health and Welfare<br>1. Laboratory of Communicable Diseases (Estonia); 2. Eurofins Genomics Europe Sequencing GmbH                                                     | Carita Savolainen-Kopra; Erika Lindh; Haider al-Hello; Jani Halkilahti; Kirsi Liitsola; Niina Ikonen; Pekka Elonen; Päivi Laurila; Sari Hannula; Soile Blomqvist; Teemu Smura<br>Lidia Dotsenko et al.                                                                                                                                                                                                                                                                                                     |
| EPI_ISL_1637187, EPI_ISL_1730407, EPI_ISL_1978425, EPI_ISL_1978672, EPI_ISL_1978729, EPI_ISL_1978893, EPI_ISL_2126212, EPI_ISL_2126321, EPI_ISL_2126374, EPI_ISL_2126425, EPI_ISL_2239933, EPI_ISL_2239944, EPI_ISL_2240213, EPI_ISL_2240218, EPI_ISL_2356069, EPI_ISL_2434582, EPI_ISL_2434724, EPI_ISL_2518416, EPI_ISL_2518429, EPI_ISL_2518757, EPI_ISL_2518783, EPI_ISL_2518866, EPI_ISL_2518894, EPI_ISL_2518910, EPI_ISL_2623160, EPI_ISL_2705945, EPI_ISL_2706032, EPI_ISL_2706110, EPI_ISL_2706245, EPI_ISL_2706313, EPI_ISL_2706332                                                                                                                                                                                                                                                                                                                                                                                                                                                                                                                                                                                                                                                                                                                                                                                                                                                                                                   | see above                                                                                                                                        | Northumbria University / South Tees Hospitals NHS Foundation Trust / North Cumbria Integrated Care NHS Foundation Trust / North Tees and Hartlepool NHS Foundation Trust / Newcastle Hospitals NHS Foundation Trust | COVID-19 Genomics UK (COG-UK) Consortium<br>Andrew Nelson; Brendan Payne; Clive Graham; Darren L Smith; Debra Paddgett; Edward Barton; Emma Swindells; Garren Scott; Gary Black; Gary Eltringham; Giles S Holt; Greg R Young; Jane Greenaway; Jennifer Collins; John Allan; Joshua Loh; Lynn Dover; Matthew Bashton; Mohammad A Tariq; Paul Baker; Sarah Essex; Steve Liggett; Wen C Yew; Yusri Taha                                                                                                       |
| EPI_ISL_1685365                                                                                                                                                                                                                                                                                                                                                                                                                                                                                                                                                                                                                                                                                                                                                                                                                                                                                                                                                                                                                                                                                                                                                                                                                                                                                                                                                                                                                                 | Noth Estonia Medical Centre                                                                                                                      | 1. Laboratory of Communicable Diseases (Estonia); 2. Eurofins Genomics Europe Sequencing GmbH                                                                                                                       | Lidia Dotsenko et al.                                                                                                                                                                                                                                                                                                                                                                                                                                                                                      |
| EPI_ISL_534326                                                                                                                                                                                                                                                                                                                                                                                                                                                                                                                                                                                                                                                                                                                                                                                                                                                                                                                                                                                                                                                                                                                                                                                                                                                                                                                                                                                                                                  | Notre Dame Intermedica Saude AS                                                                                                                  | Instituto Adolfo Lutz, Interdisciplinary Procedures Center, Strategic Laboratory                                                                                                                                    | Claudia Regina Gonçalves; Claudio Tavares Sacchi; Erica Valessa Ramos Gomes                                                                                                                                                                                                                                                                                                                                                                                                                                |
| EPI_ISL_2372342, EPI_ISL_2372361, EPI_ISL_2372381                                                                                                                                                                                                                                                                                                                                                                                                                                                                                                                                                                                                                                                                                                                                                                                                                                                                                                                                                                                                                                                                                                                                                                                                                                                                                                                                                                                               | Nyangabwe Hospital HIV Reference Laboratory                                                                                                      | Botswana Harvard HIV Reference Laboratory                                                                                                                                                                           | Boitumelo Zuze; Botshelo Radibe; Dorcas Maruapula; Joseph Makhema; Keoratlhe Ntshambiwa; Kgomotsi Moruisi; Legodile Koepile; Madisa Mine; Mosepele Mosepele; Ontlametse T. Bareng; Pamela Smith-Lawrence; Roger Shapiro; Shahin Lockman; Shikuhile Moyo; Simani Gasetsile; Thongbotho Mphoyakgosi; Wonderful T. Choga                                                                                                                                                                                      |
| EPI_ISL_1904870, EPI_ISL_2017488, EPI_ISL_2017490, EPI_ISL_2178978, EPI_ISL_2402535, EPI_ISL_2402541, EPI_ISL_2544905, EPI_ISL_2544907, EPI_ISL_2773986, EPI_ISL_2773988, EPI_ISL_2773989, EPI_ISL_2773990, EPI_ISL_2773991, EPI_ISL_2773993, EPI_ISL_2773994, EPI_ISL_2773995, EPI_ISL_2773996, EPI_ISL_2773997, EPI_ISL_2773998, EPI_ISL_2773999, EPI_ISL_2774001, EPI_ISL_2774002                                                                                                                                                                                                                                                                                                                                                                                                                                                                                                                                                                                                                                                                                                                                                                                                                                                                                                                                                                                                                                                            | see above                                                                                                                                        | OLVZ Aalst                                                                                                                                                                                                          | Anne Vankeerberghen; Astrid Holderbeke                                                                                                                                                                                                                                                                                                                                                                                                                                                                     |
| EPI_ISL_2342007, EPI_ISL_2342009, EPI_ISL_2342023, EPI_ISL_2342034, EPI_ISL_2342044, EPI_ISL_2342050, EPI_ISL_2342111, EPI_ISL_2342263, EPI_ISL_2342264, EPI_ISL_2342280, EPI_ISL_2342358                                                                                                                                                                                                                                                                                                                                                                                                                                                                                                                                                                                                                                                                                                                                                                                                                                                                                                                                                                                                                                                                                                                                                                                                                                                       | see above                                                                                                                                        | Old District Headquarter Hospital, Jharsuguda                                                                                                                                                                       | Institute of Life Sciences - INSACOG<br>Ajay Parida; Anol M. Kanampaliwar; Arup Ghosh; Atimukta Jha; INSACOG Consortium; Omprakash Shiriwas; Punit Prasad; Rajeeb Swain; Rupesh Dash; Safal Walia; Sana Fatma; Shifu Aggarwal; Sunil K. Raghav                                                                                                                                                                                                                                                             |
| EPI_ISL_1443671, EPI_ISL_1443679, EPI_ISL_2604869, EPI_ISL_2604870, EPI_ISL_2604871, EPI_ISL_2604872, EPI_ISL_2604882                                                                                                                                                                                                                                                                                                                                                                                                                                                                                                                                                                                                                                                                                                                                                                                                                                                                                                                                                                                                                                                                                                                                                                                                                                                                                                                           | see above                                                                                                                                        | Omics Sciences Laboratory                                                                                                                                                                                           | Omics Sciences Laboratory<br>Darlyn Amaya; Derly Andrade Molina; Emily Sulay Saltos Montalvo; Gabriel Morey León; Juan Carlos Fernández Cadena; Kathryn Sacheri Viteri; Paula Juliana Gavilanes Jarrín; Rubén Armas González                                                                                                                                                                                                                                                                               |
| EPI_ISL_1740447, EPI_ISL_1740451                                                                                                                                                                                                                                                                                                                                                                                                                                                                                                                                                                                                                                                                                                                                                                                                                                                                                                                                                                                                                                                                                                                                                                                                                                                                                                                                                                                                                | Ontario's COVID-19 Genomics Rapid Response Coalition                                                                                             | McMaster University                                                                                                                                                                                                 | Ahmed Draia; Allison McGeer; Andrew G. McArthur; Angel Li; Emily Panousis; Hooman Derakhshani; Jalees Nasir; Kuganya Nirmalarajah; Michael Surette; Patryk Aftanas; Samira Mubareka                                                                                                                                                                                                                                                                                                                        |
| EPI_ISL_1040030                                                                                                                                                                                                                                                                                                                                                                                                                                                                                                                                                                                                                                                                                                                                                                                                                                                                                                                                                                                                                                                                                                                                                                                                                                                                                                                                                                                                                                 | Original detection - Virology Unit, Institut Pasteur du Cambodge; Sequencing - US National Institute of Allergy and Infectious Diseases          | Virology Unit, Institut Pasteur du Cambodge                                                                                                                                                                         | Chau Darapeak; Chin Savuth; Erik A Karlsson; Jennifer Bohl; Jessica Manning; Kraing Sidon; Ly Sovann; Sophana Chea; Sreyngim Lay; Veasna Duong; Yi Sengdoeurn                                                                                                                                                                                                                                                                                                                                              |

|                                                                                                                                                                                                                                                                                                                                                                                                                                                                                                                                                                                                                                                                                                                                                                                                                                                                                                                                                                                                                                                                                                                                                                                                                                                                                                                                                                                                                                                                                                                                                                                                                                                                                                                                                                                                                                                                                                                                                                                                                                                                                                                                                                                                                                                                                                                                                                                                                                                                                                                                                                                                                                                                                                                                                                                                                                                                                                                                                                                                                                                                                                                                                                                                                                                                                                                                                                                                                                                                                                                                                                                                                                                                                                                                                                                                                                                                                                                                                                                                                                                                                                                                                                                                                                                                                                                                                                                                                                                                                                                                                                                                                                                                                                                                                                                                                                                                                                                                                                                                                                                                                                                                                                                                                                                                                                                                                                                                                                                                                                                                                                                                                                                                                                                                                                                                                                                                                                                                                                                                                                                                                                                                                                                                                                                                                                                                                                                                                                                                                                                                                                                                                                                                                                                                                                               |                                                                               |                                                                                                                          |                                                                                                                                                                                                                                                                                                                                                                                                                                                                                                                                                                                                                                                                                                                                                                                                                                                                                                                                                                                                                                                                                             |
|-------------------------------------------------------------------------------------------------------------------------------------------------------------------------------------------------------------------------------------------------------------------------------------------------------------------------------------------------------------------------------------------------------------------------------------------------------------------------------------------------------------------------------------------------------------------------------------------------------------------------------------------------------------------------------------------------------------------------------------------------------------------------------------------------------------------------------------------------------------------------------------------------------------------------------------------------------------------------------------------------------------------------------------------------------------------------------------------------------------------------------------------------------------------------------------------------------------------------------------------------------------------------------------------------------------------------------------------------------------------------------------------------------------------------------------------------------------------------------------------------------------------------------------------------------------------------------------------------------------------------------------------------------------------------------------------------------------------------------------------------------------------------------------------------------------------------------------------------------------------------------------------------------------------------------------------------------------------------------------------------------------------------------------------------------------------------------------------------------------------------------------------------------------------------------------------------------------------------------------------------------------------------------------------------------------------------------------------------------------------------------------------------------------------------------------------------------------------------------------------------------------------------------------------------------------------------------------------------------------------------------------------------------------------------------------------------------------------------------------------------------------------------------------------------------------------------------------------------------------------------------------------------------------------------------------------------------------------------------------------------------------------------------------------------------------------------------------------------------------------------------------------------------------------------------------------------------------------------------------------------------------------------------------------------------------------------------------------------------------------------------------------------------------------------------------------------------------------------------------------------------------------------------------------------------------------------------------------------------------------------------------------------------------------------------------------------------------------------------------------------------------------------------------------------------------------------------------------------------------------------------------------------------------------------------------------------------------------------------------------------------------------------------------------------------------------------------------------------------------------------------------------------------------------------------------------------------------------------------------------------------------------------------------------------------------------------------------------------------------------------------------------------------------------------------------------------------------------------------------------------------------------------------------------------------------------------------------------------------------------------------------------------------------------------------------------------------------------------------------------------------------------------------------------------------------------------------------------------------------------------------------------------------------------------------------------------------------------------------------------------------------------------------------------------------------------------------------------------------------------------------------------------------------------------------------------------------------------------------------------------------------------------------------------------------------------------------------------------------------------------------------------------------------------------------------------------------------------------------------------------------------------------------------------------------------------------------------------------------------------------------------------------------------------------------------------------------------------------------------------------------------------------------------------------------------------------------------------------------------------------------------------------------------------------------------------------------------------------------------------------------------------------------------------------------------------------------------------------------------------------------------------------------------------------------------------------------------------------------------------------------------------------------------------------------------------------------------------------------------------------------------------------------------------------------------------------------------------------------------------------------------------------------------------------------------------------------------------------------------------------------------------------------------------------------------------------------------------------------------------------------------------------------|-------------------------------------------------------------------------------|--------------------------------------------------------------------------------------------------------------------------|---------------------------------------------------------------------------------------------------------------------------------------------------------------------------------------------------------------------------------------------------------------------------------------------------------------------------------------------------------------------------------------------------------------------------------------------------------------------------------------------------------------------------------------------------------------------------------------------------------------------------------------------------------------------------------------------------------------------------------------------------------------------------------------------------------------------------------------------------------------------------------------------------------------------------------------------------------------------------------------------------------------------------------------------------------------------------------------------|
| Cambodia                                                                                                                                                                                                                                                                                                                                                                                                                                                                                                                                                                                                                                                                                                                                                                                                                                                                                                                                                                                                                                                                                                                                                                                                                                                                                                                                                                                                                                                                                                                                                                                                                                                                                                                                                                                                                                                                                                                                                                                                                                                                                                                                                                                                                                                                                                                                                                                                                                                                                                                                                                                                                                                                                                                                                                                                                                                                                                                                                                                                                                                                                                                                                                                                                                                                                                                                                                                                                                                                                                                                                                                                                                                                                                                                                                                                                                                                                                                                                                                                                                                                                                                                                                                                                                                                                                                                                                                                                                                                                                                                                                                                                                                                                                                                                                                                                                                                                                                                                                                                                                                                                                                                                                                                                                                                                                                                                                                                                                                                                                                                                                                                                                                                                                                                                                                                                                                                                                                                                                                                                                                                                                                                                                                                                                                                                                                                                                                                                                                                                                                                                                                                                                                                                                                                                                      |                                                                               |                                                                                                                          |                                                                                                                                                                                                                                                                                                                                                                                                                                                                                                                                                                                                                                                                                                                                                                                                                                                                                                                                                                                                                                                                                             |
| EPI_ISL_1730648, EPI_ISL_1730650, EPI_ISL_1730652, EPI_ISL_1730654, EPI_ISL_1730662, EPI_ISL_1730804, EPI_ISL_1979483, EPI_ISL_1979485, EPI_ISL_2707461                                                                                                                                                                                                                                                                                                                                                                                                                                                                                                                                                                                                                                                                                                                                                                                                                                                                                                                                                                                                                                                                                                                                                                                                                                                                                                                                                                                                                                                                                                                                                                                                                                                                                                                                                                                                                                                                                                                                                                                                                                                                                                                                                                                                                                                                                                                                                                                                                                                                                                                                                                                                                                                                                                                                                                                                                                                                                                                                                                                                                                                                                                                                                                                                                                                                                                                                                                                                                                                                                                                                                                                                                                                                                                                                                                                                                                                                                                                                                                                                                                                                                                                                                                                                                                                                                                                                                                                                                                                                                                                                                                                                                                                                                                                                                                                                                                                                                                                                                                                                                                                                                                                                                                                                                                                                                                                                                                                                                                                                                                                                                                                                                                                                                                                                                                                                                                                                                                                                                                                                                                                                                                                                                                                                                                                                                                                                                                                                                                                                                                                                                                                                                       |                                                                               |                                                                                                                          |                                                                                                                                                                                                                                                                                                                                                                                                                                                                                                                                                                                                                                                                                                                                                                                                                                                                                                                                                                                                                                                                                             |
| see above                                                                                                                                                                                                                                                                                                                                                                                                                                                                                                                                                                                                                                                                                                                                                                                                                                                                                                                                                                                                                                                                                                                                                                                                                                                                                                                                                                                                                                                                                                                                                                                                                                                                                                                                                                                                                                                                                                                                                                                                                                                                                                                                                                                                                                                                                                                                                                                                                                                                                                                                                                                                                                                                                                                                                                                                                                                                                                                                                                                                                                                                                                                                                                                                                                                                                                                                                                                                                                                                                                                                                                                                                                                                                                                                                                                                                                                                                                                                                                                                                                                                                                                                                                                                                                                                                                                                                                                                                                                                                                                                                                                                                                                                                                                                                                                                                                                                                                                                                                                                                                                                                                                                                                                                                                                                                                                                                                                                                                                                                                                                                                                                                                                                                                                                                                                                                                                                                                                                                                                                                                                                                                                                                                                                                                                                                                                                                                                                                                                                                                                                                                                                                                                                                                                                                                     | Originating lab: Wales Specialist Virology Centre<br>Pathogen Genomics Unit   | Public Health Wales Microbiology<br>Cardiff Wales Specialist Virology Centre                                             | Alec Birchley; Alexander Adams; Amy Gaskin; Angela Marchbank; Bree Gatica-Wilcox; Catherine Moore; Jason Coombes; Joanne Watkins; Joel Southgate; Johnathan Evans; Laura Gifford; Lauren Gilbert; Lee Graham; Malorie Perry; Matthew Bull; Nicole Pacchiariani; Sally Corden; Sara Kumzenie-Summerhayes; Sara Rey; Sarah Taylor; Simon Cottrell; Sophie Jones; Tom Connor                                                                                                                                                                                                                                                                                                                                                                                                                                                                                                                                                                                                                                                                                                                   |
| EPI_ISL_2376420                                                                                                                                                                                                                                                                                                                                                                                                                                                                                                                                                                                                                                                                                                                                                                                                                                                                                                                                                                                                                                                                                                                                                                                                                                                                                                                                                                                                                                                                                                                                                                                                                                                                                                                                                                                                                                                                                                                                                                                                                                                                                                                                                                                                                                                                                                                                                                                                                                                                                                                                                                                                                                                                                                                                                                                                                                                                                                                                                                                                                                                                                                                                                                                                                                                                                                                                                                                                                                                                                                                                                                                                                                                                                                                                                                                                                                                                                                                                                                                                                                                                                                                                                                                                                                                                                                                                                                                                                                                                                                                                                                                                                                                                                                                                                                                                                                                                                                                                                                                                                                                                                                                                                                                                                                                                                                                                                                                                                                                                                                                                                                                                                                                                                                                                                                                                                                                                                                                                                                                                                                                                                                                                                                                                                                                                                                                                                                                                                                                                                                                                                                                                                                                                                                                                                               | Ospedale Magalini                                                             | Istituto Zooprofilattico Sperimentale delle Venezie                                                                      | Adelaide Milani; Alessia Schivo; Alice Fusaro; Ambra Pastorì; Annalisa Salviato; Antonia Ricci; Calogero Terregino; Edoardo Giussani; Elisa Palumbo; Erika Giorgia Quaranta; Isabella Monne; Luca Tassoni                                                                                                                                                                                                                                                                                                                                                                                                                                                                                                                                                                                                                                                                                                                                                                                                                                                                                   |
| EPI_ISL_1919755, EPI_ISL_1919757                                                                                                                                                                                                                                                                                                                                                                                                                                                                                                                                                                                                                                                                                                                                                                                                                                                                                                                                                                                                                                                                                                                                                                                                                                                                                                                                                                                                                                                                                                                                                                                                                                                                                                                                                                                                                                                                                                                                                                                                                                                                                                                                                                                                                                                                                                                                                                                                                                                                                                                                                                                                                                                                                                                                                                                                                                                                                                                                                                                                                                                                                                                                                                                                                                                                                                                                                                                                                                                                                                                                                                                                                                                                                                                                                                                                                                                                                                                                                                                                                                                                                                                                                                                                                                                                                                                                                                                                                                                                                                                                                                                                                                                                                                                                                                                                                                                                                                                                                                                                                                                                                                                                                                                                                                                                                                                                                                                                                                                                                                                                                                                                                                                                                                                                                                                                                                                                                                                                                                                                                                                                                                                                                                                                                                                                                                                                                                                                                                                                                                                                                                                                                                                                                                                                              | Ospedale Santa Caterina Novella                                               | Istituto Zooprofilattico Sperimentale della Puglia e della Basilicata                                                    |                                                                                                                                                                                                                                                                                                                                                                                                                                                                                                                                                                                                                                                                                                                                                                                                                                                                                                                                                                                                                                                                                             |
| EPI_ISL_1443893                                                                                                                                                                                                                                                                                                                                                                                                                                                                                                                                                                                                                                                                                                                                                                                                                                                                                                                                                                                                                                                                                                                                                                                                                                                                                                                                                                                                                                                                                                                                                                                                                                                                                                                                                                                                                                                                                                                                                                                                                                                                                                                                                                                                                                                                                                                                                                                                                                                                                                                                                                                                                                                                                                                                                                                                                                                                                                                                                                                                                                                                                                                                                                                                                                                                                                                                                                                                                                                                                                                                                                                                                                                                                                                                                                                                                                                                                                                                                                                                                                                                                                                                                                                                                                                                                                                                                                                                                                                                                                                                                                                                                                                                                                                                                                                                                                                                                                                                                                                                                                                                                                                                                                                                                                                                                                                                                                                                                                                                                                                                                                                                                                                                                                                                                                                                                                                                                                                                                                                                                                                                                                                                                                                                                                                                                                                                                                                                                                                                                                                                                                                                                                                                                                                                                               | Outre mer                                                                     | National Reference Center for Viruses of Respiratory Infections, Institut Pasteur, Paris                                 | Bianco A.; Bruno A.; Capozzi L.; Del Sambre L.; Difato L.; Parisi A.; Simone D.                                                                                                                                                                                                                                                                                                                                                                                                                                                                                                                                                                                                                                                                                                                                                                                                                                                                                                                                                                                                             |
| EPI_ISL_2660887, EPI_ISL_2660891                                                                                                                                                                                                                                                                                                                                                                                                                                                                                                                                                                                                                                                                                                                                                                                                                                                                                                                                                                                                                                                                                                                                                                                                                                                                                                                                                                                                                                                                                                                                                                                                                                                                                                                                                                                                                                                                                                                                                                                                                                                                                                                                                                                                                                                                                                                                                                                                                                                                                                                                                                                                                                                                                                                                                                                                                                                                                                                                                                                                                                                                                                                                                                                                                                                                                                                                                                                                                                                                                                                                                                                                                                                                                                                                                                                                                                                                                                                                                                                                                                                                                                                                                                                                                                                                                                                                                                                                                                                                                                                                                                                                                                                                                                                                                                                                                                                                                                                                                                                                                                                                                                                                                                                                                                                                                                                                                                                                                                                                                                                                                                                                                                                                                                                                                                                                                                                                                                                                                                                                                                                                                                                                                                                                                                                                                                                                                                                                                                                                                                                                                                                                                                                                                                                                              | PASTEUR MOLECULAR LABORATORY - INSACOG MEGHALAYA                              | CSIR-Centre for Cellular and Molecular Biology-INSACOG                                                                   | Amreshwar Vodapalli; Ara Sreenivas; Archana Bharadwaj Siva; B Himasri; Divya Tej Sowpati; E Marak; E Shadap; Karthik Bharadwaj Tallapaka; Lamuk Zaveri; Onkar Kulkarni; Pethel Mukherjee; Priya Narkurthy; R. Lyngdoh; Rakesh K Mishra; Shreekant Verma; Sofia Banu; Sumeधा Avadhaniula; Tulasi Nagabandi; Valli Nagalakshmi Undamatia; Vidhyadhari Mayekulu                                                                                                                                                                                                                                                                                                                                                                                                                                                                                                                                                                                                                                                                                                                                |
| EPI_ISL_1170952, EPI_ISL_1241839, EPI_ISL_1300528, EPI_ISL_1300534, EPI_ISL_1465881, EPI_ISL_1465882, EPI_ISL_1465883, EPI_ISL_1516885, EPI_ISL_1563660, EPI_ISL_1563670, EPI_ISL_1563675, EPI_ISL_1910856, EPI_ISL_1910859, EPI_ISL_2001058, EPI_ISL_2001060, EPI_ISL_2137035, EPI_ISL_2385968, EPI_ISL_2385970, EPI_ISL_2385971, EPI_ISL_2385973, EPI_ISL_2507084, EPI_ISL_2507085, EPI_ISL_2507087, EPI_ISL_2507088, EPI_ISL_2507090, EPI_ISL_2507091, EPI_ISL_2507096, EPI_ISL_2603822                                                                                                                                                                                                                                                                                                                                                                                                                                                                                                                                                                                                                                                                                                                                                                                                                                                                                                                                                                                                                                                                                                                                                                                                                                                                                                                                                                                                                                                                                                                                                                                                                                                                                                                                                                                                                                                                                                                                                                                                                                                                                                                                                                                                                                                                                                                                                                                                                                                                                                                                                                                                                                                                                                                                                                                                                                                                                                                                                                                                                                                                                                                                                                                                                                                                                                                                                                                                                                                                                                                                                                                                                                                                                                                                                                                                                                                                                                                                                                                                                                                                                                                                                                                                                                                                                                                                                                                                                                                                                                                                                                                                                                                                                                                                                                                                                                                                                                                                                                                                                                                                                                                                                                                                                                                                                                                                                                                                                                                                                                                                                                                                                                                                                                                                                                                                                                                                                                                                                                                                                                                                                                                                                                                                                                                                                    |                                                                               |                                                                                                                          |                                                                                                                                                                                                                                                                                                                                                                                                                                                                                                                                                                                                                                                                                                                                                                                                                                                                                                                                                                                                                                                                                             |
| see above                                                                                                                                                                                                                                                                                                                                                                                                                                                                                                                                                                                                                                                                                                                                                                                                                                                                                                                                                                                                                                                                                                                                                                                                                                                                                                                                                                                                                                                                                                                                                                                                                                                                                                                                                                                                                                                                                                                                                                                                                                                                                                                                                                                                                                                                                                                                                                                                                                                                                                                                                                                                                                                                                                                                                                                                                                                                                                                                                                                                                                                                                                                                                                                                                                                                                                                                                                                                                                                                                                                                                                                                                                                                                                                                                                                                                                                                                                                                                                                                                                                                                                                                                                                                                                                                                                                                                                                                                                                                                                                                                                                                                                                                                                                                                                                                                                                                                                                                                                                                                                                                                                                                                                                                                                                                                                                                                                                                                                                                                                                                                                                                                                                                                                                                                                                                                                                                                                                                                                                                                                                                                                                                                                                                                                                                                                                                                                                                                                                                                                                                                                                                                                                                                                                                                                     | PHV-FSS                                                                       | PHV-FSS                                                                                                                  | Son Nguyen                                                                                                                                                                                                                                                                                                                                                                                                                                                                                                                                                                                                                                                                                                                                                                                                                                                                                                                                                                                                                                                                                  |
| EPI_ISL_1824607                                                                                                                                                                                                                                                                                                                                                                                                                                                                                                                                                                                                                                                                                                                                                                                                                                                                                                                                                                                                                                                                                                                                                                                                                                                                                                                                                                                                                                                                                                                                                                                                                                                                                                                                                                                                                                                                                                                                                                                                                                                                                                                                                                                                                                                                                                                                                                                                                                                                                                                                                                                                                                                                                                                                                                                                                                                                                                                                                                                                                                                                                                                                                                                                                                                                                                                                                                                                                                                                                                                                                                                                                                                                                                                                                                                                                                                                                                                                                                                                                                                                                                                                                                                                                                                                                                                                                                                                                                                                                                                                                                                                                                                                                                                                                                                                                                                                                                                                                                                                                                                                                                                                                                                                                                                                                                                                                                                                                                                                                                                                                                                                                                                                                                                                                                                                                                                                                                                                                                                                                                                                                                                                                                                                                                                                                                                                                                                                                                                                                                                                                                                                                                                                                                                                                               | PKC Jagakarsa                                                                 | National Institute of Health Research and Development                                                                    | Arie Ardiansyah Nugraha; Hana Apsari Pawestri; Hartanti Dian Ikawati; Kartika Dewi Puspa; Krisna Pangesti; Nelly Puspandari; Subangkit; Vivi Setiawaty                                                                                                                                                                                                                                                                                                                                                                                                                                                                                                                                                                                                                                                                                                                                                                                                                                                                                                                                      |
| EPI_ISL_2342002, EPI_ISL_2342020, EPI_ISL_2342058, EPI_ISL_2342083, EPI_ISL_2342307, EPI_ISL_2342633, EPI_ISL_2342716                                                                                                                                                                                                                                                                                                                                                                                                                                                                                                                                                                                                                                                                                                                                                                                                                                                                                                                                                                                                                                                                                                                                                                                                                                                                                                                                                                                                                                                                                                                                                                                                                                                                                                                                                                                                                                                                                                                                                                                                                                                                                                                                                                                                                                                                                                                                                                                                                                                                                                                                                                                                                                                                                                                                                                                                                                                                                                                                                                                                                                                                                                                                                                                                                                                                                                                                                                                                                                                                                                                                                                                                                                                                                                                                                                                                                                                                                                                                                                                                                                                                                                                                                                                                                                                                                                                                                                                                                                                                                                                                                                                                                                                                                                                                                                                                                                                                                                                                                                                                                                                                                                                                                                                                                                                                                                                                                                                                                                                                                                                                                                                                                                                                                                                                                                                                                                                                                                                                                                                                                                                                                                                                                                                                                                                                                                                                                                                                                                                                                                                                                                                                                                                         |                                                                               |                                                                                                                          |                                                                                                                                                                                                                                                                                                                                                                                                                                                                                                                                                                                                                                                                                                                                                                                                                                                                                                                                                                                                                                                                                             |
| see above                                                                                                                                                                                                                                                                                                                                                                                                                                                                                                                                                                                                                                                                                                                                                                                                                                                                                                                                                                                                                                                                                                                                                                                                                                                                                                                                                                                                                                                                                                                                                                                                                                                                                                                                                                                                                                                                                                                                                                                                                                                                                                                                                                                                                                                                                                                                                                                                                                                                                                                                                                                                                                                                                                                                                                                                                                                                                                                                                                                                                                                                                                                                                                                                                                                                                                                                                                                                                                                                                                                                                                                                                                                                                                                                                                                                                                                                                                                                                                                                                                                                                                                                                                                                                                                                                                                                                                                                                                                                                                                                                                                                                                                                                                                                                                                                                                                                                                                                                                                                                                                                                                                                                                                                                                                                                                                                                                                                                                                                                                                                                                                                                                                                                                                                                                                                                                                                                                                                                                                                                                                                                                                                                                                                                                                                                                                                                                                                                                                                                                                                                                                                                                                                                                                                                                     | PRM Medical College & Hospital, Baripada                                      | Institute of Life Sciences - INSACOG                                                                                     | Ajay Parida; Amol M. Kanampalliwar; Arup Ghosh; Atimukta Jha; INSACOG Consortium; Omprakash Shiriwasi; Punit Prasad; Rajeeb Swain; Rupesh Dash; Safal Wallia; Sana Fatma; Shifu Aggarwal; Sunil K. Raghav                                                                                                                                                                                                                                                                                                                                                                                                                                                                                                                                                                                                                                                                                                                                                                                                                                                                                   |
| EPI_ISL_2345614                                                                                                                                                                                                                                                                                                                                                                                                                                                                                                                                                                                                                                                                                                                                                                                                                                                                                                                                                                                                                                                                                                                                                                                                                                                                                                                                                                                                                                                                                                                                                                                                                                                                                                                                                                                                                                                                                                                                                                                                                                                                                                                                                                                                                                                                                                                                                                                                                                                                                                                                                                                                                                                                                                                                                                                                                                                                                                                                                                                                                                                                                                                                                                                                                                                                                                                                                                                                                                                                                                                                                                                                                                                                                                                                                                                                                                                                                                                                                                                                                                                                                                                                                                                                                                                                                                                                                                                                                                                                                                                                                                                                                                                                                                                                                                                                                                                                                                                                                                                                                                                                                                                                                                                                                                                                                                                                                                                                                                                                                                                                                                                                                                                                                                                                                                                                                                                                                                                                                                                                                                                                                                                                                                                                                                                                                                                                                                                                                                                                                                                                                                                                                                                                                                                                                               | PRONTO SOCORRO MUNICIPAL DE PARAIBUNA                                         | Instituto Butantan / ESALQ-Piracicaba                                                                                    | Antonio Jorge Martins; Claudia Renata dos Santos Barros; David Schlesinger; Debora Botequiao Moretti; Dimas Tadeu Covas; Elaine Cristina Marqueze; Elaine Vieira Santos; Evandra Strazza Rodrigues; Heidge Fukumasu; Jayme Augusto de Souza-Neto; José Salvatore Leister Patané; Luiz Alcantara; Luiz Lehmann Coutinho; Maria Carolina Elias; Maurício Lacerda Nogueira; Rafael dos Santos Bezerra; Nadi Machado Neto; Rejane Maria Tommasini Grotto; Ricardo Haddad; Sandra Coccuzzo Sampaio Vessoni; Simone Kashima; Svetoslav Nenev Slavov; Vincent Louis Viala                                                                                                                                                                                                                                                                                                                                                                                                                                                                                                                          |
| EPI_ISL_1824604                                                                                                                                                                                                                                                                                                                                                                                                                                                                                                                                                                                                                                                                                                                                                                                                                                                                                                                                                                                                                                                                                                                                                                                                                                                                                                                                                                                                                                                                                                                                                                                                                                                                                                                                                                                                                                                                                                                                                                                                                                                                                                                                                                                                                                                                                                                                                                                                                                                                                                                                                                                                                                                                                                                                                                                                                                                                                                                                                                                                                                                                                                                                                                                                                                                                                                                                                                                                                                                                                                                                                                                                                                                                                                                                                                                                                                                                                                                                                                                                                                                                                                                                                                                                                                                                                                                                                                                                                                                                                                                                                                                                                                                                                                                                                                                                                                                                                                                                                                                                                                                                                                                                                                                                                                                                                                                                                                                                                                                                                                                                                                                                                                                                                                                                                                                                                                                                                                                                                                                                                                                                                                                                                                                                                                                                                                                                                                                                                                                                                                                                                                                                                                                                                                                                                               | PRVKP FK UI                                                                   | National Institute of Health Research and Development                                                                    | Arie Ardiansyah Nugraha; Hana Apsari Pawestri; Hartanti Dian Ikawati; Kartika Dewi Puspa; Krisna Pangesti; Nelly Puspandari; Subangkit; Vivi Setiawaty                                                                                                                                                                                                                                                                                                                                                                                                                                                                                                                                                                                                                                                                                                                                                                                                                                                                                                                                      |
| EPI_ISL_1312707                                                                                                                                                                                                                                                                                                                                                                                                                                                                                                                                                                                                                                                                                                                                                                                                                                                                                                                                                                                                                                                                                                                                                                                                                                                                                                                                                                                                                                                                                                                                                                                                                                                                                                                                                                                                                                                                                                                                                                                                                                                                                                                                                                                                                                                                                                                                                                                                                                                                                                                                                                                                                                                                                                                                                                                                                                                                                                                                                                                                                                                                                                                                                                                                                                                                                                                                                                                                                                                                                                                                                                                                                                                                                                                                                                                                                                                                                                                                                                                                                                                                                                                                                                                                                                                                                                                                                                                                                                                                                                                                                                                                                                                                                                                                                                                                                                                                                                                                                                                                                                                                                                                                                                                                                                                                                                                                                                                                                                                                                                                                                                                                                                                                                                                                                                                                                                                                                                                                                                                                                                                                                                                                                                                                                                                                                                                                                                                                                                                                                                                                                                                                                                                                                                                                                               | PSKUS                                                                         | Latvian Biomedical Research and Study Centre                                                                             | Davidis Fridmanis; Elina Dimina; Guntars Zarins; Ivars Silamikelis; Janis Klovins; Janis Meisters; Janis Pjalkovskis; Juris Peverovskis; Kaspars Megnis; Laila Silamikelis; Lauma Freimane; Laura Ansons; Liga Birzniece; Monta Ustinova; Nikita Zrelavs; Uga Dumpis; Una Krumina; Vija Rovite; Zane Dobeles                                                                                                                                                                                                                                                                                                                                                                                                                                                                                                                                                                                                                                                                                                                                                                                |
| EPI_ISL_2504097, EPI_ISL_2504098, EPI_ISL_2504105, EPI_ISL_2504109, EPI_ISL_2504111                                                                                                                                                                                                                                                                                                                                                                                                                                                                                                                                                                                                                                                                                                                                                                                                                                                                                                                                                                                                                                                                                                                                                                                                                                                                                                                                                                                                                                                                                                                                                                                                                                                                                                                                                                                                                                                                                                                                                                                                                                                                                                                                                                                                                                                                                                                                                                                                                                                                                                                                                                                                                                                                                                                                                                                                                                                                                                                                                                                                                                                                                                                                                                                                                                                                                                                                                                                                                                                                                                                                                                                                                                                                                                                                                                                                                                                                                                                                                                                                                                                                                                                                                                                                                                                                                                                                                                                                                                                                                                                                                                                                                                                                                                                                                                                                                                                                                                                                                                                                                                                                                                                                                                                                                                                                                                                                                                                                                                                                                                                                                                                                                                                                                                                                                                                                                                                                                                                                                                                                                                                                                                                                                                                                                                                                                                                                                                                                                                                                                                                                                                                                                                                                                           | Palapye Primary Hospital Laboratory                                           | Botswana Harvard HIV Reference Laboratory                                                                                | Boitumelo Zuze; Botshelo Radibe; Dorcas Maruapula; Joseph Makheima; Keoratlhe Ntshambiwa; Legodile Kooepile; Letsibogo Gaoralewe; Madisa Mine; Modisa Motswaledi; Mosepele Mosepele; Ontlametse T. Bareng; Roger Shapiro; Shahin Lockman; Sikhulile Moyo; Simani Gasetsiwe; Thela Tefelo; Thongbotho Mphoyakgosi; Wonderful T. Choga                                                                                                                                                                                                                                                                                                                                                                                                                                                                                                                                                                                                                                                                                                                                                        |
| EPI_ISL_2484799, EPI_ISL_463749                                                                                                                                                                                                                                                                                                                                                                                                                                                                                                                                                                                                                                                                                                                                                                                                                                                                                                                                                                                                                                                                                                                                                                                                                                                                                                                                                                                                                                                                                                                                                                                                                                                                                                                                                                                                                                                                                                                                                                                                                                                                                                                                                                                                                                                                                                                                                                                                                                                                                                                                                                                                                                                                                                                                                                                                                                                                                                                                                                                                                                                                                                                                                                                                                                                                                                                                                                                                                                                                                                                                                                                                                                                                                                                                                                                                                                                                                                                                                                                                                                                                                                                                                                                                                                                                                                                                                                                                                                                                                                                                                                                                                                                                                                                                                                                                                                                                                                                                                                                                                                                                                                                                                                                                                                                                                                                                                                                                                                                                                                                                                                                                                                                                                                                                                                                                                                                                                                                                                                                                                                                                                                                                                                                                                                                                                                                                                                                                                                                                                                                                                                                                                                                                                                                                               | Pamela Youde Nethersole Eastern Hospital<br>Pasteur Institute of Iran         | Hong Kong Department of Health<br>Rapid Response Team                                                                    | Alan K.L. Tsang; Dominic N.C. Tsang; Edman T.K. Lam; Gannon C.K. Mak; Ken H.L. Ng; Peter C.W. Yip; Peter K.C. Cheng; Rickjason C.W. Chan<br>Afsaneh Zokaei; Ahmad Ghasemi; Ahmad Mahmoudi; Akram Abouie Mehriizi; Ali Maleki; Ali Torabi; Amir Hesam Nemati; Arash Arashkia; Azam Amirian; Azita Eshratkhah mohammadnejad; Elmira Vadaye kheiri; Farideh niknam oskouei; Fatemeh Fotoohi-Chahokhi; Hadiseh Shokouhi Targhi; Hajarassadat Ghaderi; Hesam Karimi; Kayhan Azadmanesh; Karam Baesi; Mahboobeh Rafighi; Mahmood Barati; Mahsa Ghaelejoogh; Mahsa Tavakolirad; Mehdi Fazlipoor; Mehdi Rohani; Mehri Habibi; Mina Agharezaei; Mohamad Mahdi Mortazavipour; Mohammad Hassan Pouriazavipour; Mohammad Reza Asadi Karam; Mohammad Sadeqh Shams Nosrati; Mostafa Salehi-Vaziri; Neda Afzali; Parastoo Yekta Sanati; Saber Esmaeili; Sahar Khakifirooz; Sanam Azad-Mazjiri; Seyed Dawood Mousavi Nasab; Seyehde Atefe Hosseini; Seyehde Sahar Bathaeian; Seyehde Zahra Moraveji; Tahereh Mohammadi; Tahmineh Jalali; Zabihollah Shoja; Zahra Ahmadi; Zahra Fereydouni; Zahra Nejatipour |
| EPI_ISL_420456, EPI_ISL_470851                                                                                                                                                                                                                                                                                                                                                                                                                                                                                                                                                                                                                                                                                                                                                                                                                                                                                                                                                                                                                                                                                                                                                                                                                                                                                                                                                                                                                                                                                                                                                                                                                                                                                                                                                                                                                                                                                                                                                                                                                                                                                                                                                                                                                                                                                                                                                                                                                                                                                                                                                                                                                                                                                                                                                                                                                                                                                                                                                                                                                                                                                                                                                                                                                                                                                                                                                                                                                                                                                                                                                                                                                                                                                                                                                                                                                                                                                                                                                                                                                                                                                                                                                                                                                                                                                                                                                                                                                                                                                                                                                                                                                                                                                                                                                                                                                                                                                                                                                                                                                                                                                                                                                                                                                                                                                                                                                                                                                                                                                                                                                                                                                                                                                                                                                                                                                                                                                                                                                                                                                                                                                                                                                                                                                                                                                                                                                                                                                                                                                                                                                                                                                                                                                                                                                | PathWest Laboratory Medicine WA                                               | PathWest Laboratory Medicine WA                                                                                          | Avram Levy; Chisha Sikazwe; David Smith and David Speers; Jurissa Lang                                                                                                                                                                                                                                                                                                                                                                                                                                                                                                                                                                                                                                                                                                                                                                                                                                                                                                                                                                                                                      |
| EPI_ISL_1911192                                                                                                                                                                                                                                                                                                                                                                                                                                                                                                                                                                                                                                                                                                                                                                                                                                                                                                                                                                                                                                                                                                                                                                                                                                                                                                                                                                                                                                                                                                                                                                                                                                                                                                                                                                                                                                                                                                                                                                                                                                                                                                                                                                                                                                                                                                                                                                                                                                                                                                                                                                                                                                                                                                                                                                                                                                                                                                                                                                                                                                                                                                                                                                                                                                                                                                                                                                                                                                                                                                                                                                                                                                                                                                                                                                                                                                                                                                                                                                                                                                                                                                                                                                                                                                                                                                                                                                                                                                                                                                                                                                                                                                                                                                                                                                                                                                                                                                                                                                                                                                                                                                                                                                                                                                                                                                                                                                                                                                                                                                                                                                                                                                                                                                                                                                                                                                                                                                                                                                                                                                                                                                                                                                                                                                                                                                                                                                                                                                                                                                                                                                                                                                                                                                                                                               | PathWest Laboratory Medicine WA                                               | PathWest Laboratory Medicine WA Microbial Surveillance Unit                                                              | PathWest Laboratory Medicine WA Microbial Surveillance Unit                                                                                                                                                                                                                                                                                                                                                                                                                                                                                                                                                                                                                                                                                                                                                                                                                                                                                                                                                                                                                                 |
| EPI_ISL_512719, EPI_ISL_512720, EPI_ISL_512753, EPI_ISL_596703, EPI_ISL_596718, EPI_ISL_596764, EPI_ISL_596841, EPI_ISL_596843, EPI_ISL_596867, EPI_ISL_605853, EPI_ISL_672628, EPI_ISL_708790, EPI_ISL_708796, EPI_ISL_794673, EPI_ISL_794710, EPI_ISL_794726, EPI_ISL_810804, EPI_ISL_933795, EPI_ISL_933798, EPI_ISL_1069392, EPI_ISL_1069393, EPI_ISL_1184507, EPI_ISL_1198801, EPI_ISL_1198803, EPI_ISL_1295930, EPI_ISL_1295931, EPI_ISL_1295936, EPI_ISL_1384812, EPI_ISL_1416323, EPI_ISL_1416325, EPI_ISL_1448429, EPI_ISL_1508993, EPI_ISL_1508994, EPI_ISL_1508996, EPI_ISL_1508997, EPI_ISL_1620802, EPI_ISL_1633675, EPI_ISL_1633676, EPI_ISL_1633678, EPI_ISL_1633679, EPI_ISL_1633680, EPI_ISL_1633683, EPI_ISL_1669119, EPI_ISL_1669121, EPI_ISL_1669126, EPI_ISL_1750963, EPI_ISL_1750964, EPI_ISL_1816917, EPI_ISL_1816918, EPI_ISL_1816919, EPI_ISL_1816920, EPI_ISL_1816921, EPI_ISL_1816922, EPI_ISL_1816923, EPI_ISL_1816924, EPI_ISL_1817558, EPI_ISL_1817559, EPI_ISL_1817560, EPI_ISL_1828698, EPI_ISL_1914668, EPI_ISL_19172908, EPI_ISL_19172909, EPI_ISL_1972911, EPI_ISL_1972912, EPI_ISL_2098723, EPI_ISL_2226229, EPI_ISL_2304306, EPI_ISL_2598297                                                                                                                                                                                                                                                                                                                                                                                                                                                                                                                                                                                                                                                                                                                                                                                                                                                                                                                                                                                                                                                                                                                                                                                                                                                                                                                                                                                                                                                                                                                                                                                                                                                                                                                                                                                                                                                                                                                                                                                                                                                                                                                                                                                                                                                                                                                                                                                                                                                                                                                                                                                                                                                                                                                                                                                                                                                                                                                                                                                                                                                                                                                                                                                                                                                                                                                                                                                                                                                                                                                                                                                                                                                                                                                                                                                                                                                                                                                                                                                                                                                                                                                                                                                                                                                                                                                                                                                                                                                                                                                                                                                                                                                                                                                                                                                                                                                                                                                                                                                                                                                                                                                                                                                                                                                                                                                                                                                                                                                                                                                                                                                             | PathWest Laboratory Medicine WA                                               | PathWest Laboratory Medicine WA Microbial Surveillance Unit                                                              | PathWest Laboratory Medicine WA Microbial Surveillance Unit                                                                                                                                                                                                                                                                                                                                                                                                                                                                                                                                                                                                                                                                                                                                                                                                                                                                                                                                                                                                                                 |
| EPI_ISL_685278, EPI_ISL_687029, EPI_ISL_688097, EPI_ISL_736906, EPI_ISL_894521, EPI_ISL_901183, EPI_ISL_901369, EPI_ISL_902354, EPI_ISL_1430722, EPI_ISL_1432595, EPI_ISL_1927720, EPI_ISL_1932100, EPI_ISL_1932196, EPI_ISL_1932952, EPI_ISL_1933633, EPI_ISL_1934296, EPI_ISL_2327916, EPI_ISL_2328100, EPI_ISL_2329810, EPI_ISL_2330495, EPI_ISL_2335415, EPI_ISL_2337324, EPI_ISL_2768236                                                                                                                                                                                                                                                                                                                                                                                                                                                                                                                                                                                                                                                                                                                                                                                                                                                                                                                                                                                                                                                                                                                                                                                                                                                                                                                                                                                                                                                                                                                                                                                                                                                                                                                                                                                                                                                                                                                                                                                                                                                                                                                                                                                                                                                                                                                                                                                                                                                                                                                                                                                                                                                                                                                                                                                                                                                                                                                                                                                                                                                                                                                                                                                                                                                                                                                                                                                                                                                                                                                                                                                                                                                                                                                                                                                                                                                                                                                                                                                                                                                                                                                                                                                                                                                                                                                                                                                                                                                                                                                                                                                                                                                                                                                                                                                                                                                                                                                                                                                                                                                                                                                                                                                                                                                                                                                                                                                                                                                                                                                                                                                                                                                                                                                                                                                                                                                                                                                                                                                                                                                                                                                                                                                                                                                                                                                                                                                 | PathWest Laboratory Medicine WA                                               | PathWest Laboratory Medicine WA Microbial Surveillance Unit                                                              |                                                                                                                                                                                                                                                                                                                                                                                                                                                                                                                                                                                                                                                                                                                                                                                                                                                                                                                                                                                                                                                                                             |
| see above                                                                                                                                                                                                                                                                                                                                                                                                                                                                                                                                                                                                                                                                                                                                                                                                                                                                                                                                                                                                                                                                                                                                                                                                                                                                                                                                                                                                                                                                                                                                                                                                                                                                                                                                                                                                                                                                                                                                                                                                                                                                                                                                                                                                                                                                                                                                                                                                                                                                                                                                                                                                                                                                                                                                                                                                                                                                                                                                                                                                                                                                                                                                                                                                                                                                                                                                                                                                                                                                                                                                                                                                                                                                                                                                                                                                                                                                                                                                                                                                                                                                                                                                                                                                                                                                                                                                                                                                                                                                                                                                                                                                                                                                                                                                                                                                                                                                                                                                                                                                                                                                                                                                                                                                                                                                                                                                                                                                                                                                                                                                                                                                                                                                                                                                                                                                                                                                                                                                                                                                                                                                                                                                                                                                                                                                                                                                                                                                                                                                                                                                                                                                                                                                                                                                                                     | Pathogen Genomics Center, National Institute of Infectious Diseases           | Pathogen Genomics Center, National Institute of Infectious Diseases                                                      | Hazuka Y Furihata; Kentaro Itokawa; Makoto Kuroda; Masanori Hashino; Masumichi Saito; Naomi Nojiri; Nozomu Hanaoka; Rina Tanaka; Sana Uchikoba; Tsuguto Fujimoto; Tsuyoshi Sekizuka                                                                                                                                                                                                                                                                                                                                                                                                                                                                                                                                                                                                                                                                                                                                                                                                                                                                                                         |
| EPI_ISL_410717, EPI_ISL_414414                                                                                                                                                                                                                                                                                                                                                                                                                                                                                                                                                                                                                                                                                                                                                                                                                                                                                                                                                                                                                                                                                                                                                                                                                                                                                                                                                                                                                                                                                                                                                                                                                                                                                                                                                                                                                                                                                                                                                                                                                                                                                                                                                                                                                                                                                                                                                                                                                                                                                                                                                                                                                                                                                                                                                                                                                                                                                                                                                                                                                                                                                                                                                                                                                                                                                                                                                                                                                                                                                                                                                                                                                                                                                                                                                                                                                                                                                                                                                                                                                                                                                                                                                                                                                                                                                                                                                                                                                                                                                                                                                                                                                                                                                                                                                                                                                                                                                                                                                                                                                                                                                                                                                                                                                                                                                                                                                                                                                                                                                                                                                                                                                                                                                                                                                                                                                                                                                                                                                                                                                                                                                                                                                                                                                                                                                                                                                                                                                                                                                                                                                                                                                                                                                                                                                | Pathology Queensland                                                          | Public Health Virology Laboratory                                                                                        | Alyssa Pyke; Amanda De Jong; Andrew Van Den Hurk; Ben Huang; Bixing Huang; Carmel Taylor; David Warrilow; Doris Genge; Elisabeth Gamez; Glen Hewitson; Ian Maxwell Mackay; Inga Sultana; Jamie McMahon; Jean Barcelon; Judy Northill; Mitchell Finger; Natalie Simpson; Neelima Nair; Peter Burtonclay; Peter Moore; Sarah Wheatley; Sean Moody; Sonja Hall-Mendelin; Timothy Gardam; and Frederick Moore; and Frederick Moore                                                                                                                                                                                                                                                                                                                                                                                                                                                                                                                                                                                                                                                              |
| EPI_ISL_545050                                                                                                                                                                                                                                                                                                                                                                                                                                                                                                                                                                                                                                                                                                                                                                                                                                                                                                                                                                                                                                                                                                                                                                                                                                                                                                                                                                                                                                                                                                                                                                                                                                                                                                                                                                                                                                                                                                                                                                                                                                                                                                                                                                                                                                                                                                                                                                                                                                                                                                                                                                                                                                                                                                                                                                                                                                                                                                                                                                                                                                                                                                                                                                                                                                                                                                                                                                                                                                                                                                                                                                                                                                                                                                                                                                                                                                                                                                                                                                                                                                                                                                                                                                                                                                                                                                                                                                                                                                                                                                                                                                                                                                                                                                                                                                                                                                                                                                                                                                                                                                                                                                                                                                                                                                                                                                                                                                                                                                                                                                                                                                                                                                                                                                                                                                                                                                                                                                                                                                                                                                                                                                                                                                                                                                                                                                                                                                                                                                                                                                                                                                                                                                                                                                                                                                | Pathology West - NSW Health Pathology                                         | NSW Health Pathology - Institute of Clinical Pathology and Medical Research; Westmead Hospital; University of Sydney     | CIDM-PH et al.                                                                                                                                                                                                                                                                                                                                                                                                                                                                                                                                                                                                                                                                                                                                                                                                                                                                                                                                                                                                                                                                              |
| EPI_ISL_2013035                                                                                                                                                                                                                                                                                                                                                                                                                                                                                                                                                                                                                                                                                                                                                                                                                                                                                                                                                                                                                                                                                                                                                                                                                                                                                                                                                                                                                                                                                                                                                                                                                                                                                                                                                                                                                                                                                                                                                                                                                                                                                                                                                                                                                                                                                                                                                                                                                                                                                                                                                                                                                                                                                                                                                                                                                                                                                                                                                                                                                                                                                                                                                                                                                                                                                                                                                                                                                                                                                                                                                                                                                                                                                                                                                                                                                                                                                                                                                                                                                                                                                                                                                                                                                                                                                                                                                                                                                                                                                                                                                                                                                                                                                                                                                                                                                                                                                                                                                                                                                                                                                                                                                                                                                                                                                                                                                                                                                                                                                                                                                                                                                                                                                                                                                                                                                                                                                                                                                                                                                                                                                                                                                                                                                                                                                                                                                                                                                                                                                                                                                                                                                                                                                                                                                               | Plateforme Covid IDF, site Broussais                                          | HEGP - Laboratoire de Virologie                                                                                          | David Veyer; Hélène Péré; Julien Puech; Maxime Wack; Nabil Gastli; Nicolas Robillard; Sandrine Imbeaud                                                                                                                                                                                                                                                                                                                                                                                                                                                                                                                                                                                                                                                                                                                                                                                                                                                                                                                                                                                      |
| EPI_ISL_2346305, EPI_ISL_2346306, EPI_ISL_2346307, EPI_ISL_2397205, EPI_ISL_2397207, EPI_ISL_2521698, EPI_ISL_2521962, EPI_ISL_2521963, EPI_ISL_2521968, EPI_ISL_2521971, EPI_ISL_2521979, EPI_ISL_2532758, EPI_ISL_2600929, EPI_ISL_2600932, EPI_ISL_2600933, EPI_ISL_2600936, EPI_ISL_2600949, EPI_ISL_2600950, EPI_ISL_2673685, EPI_ISL_2673687, EPI_ISL_2673689                                                                                                                                                                                                                                                                                                                                                                                                                                                                                                                                                                                                                                                                                                                                                                                                                                                                                                                                                                                                                                                                                                                                                                                                                                                                                                                                                                                                                                                                                                                                                                                                                                                                                                                                                                                                                                                                                                                                                                                                                                                                                                                                                                                                                                                                                                                                                                                                                                                                                                                                                                                                                                                                                                                                                                                                                                                                                                                                                                                                                                                                                                                                                                                                                                                                                                                                                                                                                                                                                                                                                                                                                                                                                                                                                                                                                                                                                                                                                                                                                                                                                                                                                                                                                                                                                                                                                                                                                                                                                                                                                                                                                                                                                                                                                                                                                                                                                                                                                                                                                                                                                                                                                                                                                                                                                                                                                                                                                                                                                                                                                                                                                                                                                                                                                                                                                                                                                                                                                                                                                                                                                                                                                                                                                                                                                                                                                                                                           | Plateforme de testing Namuroise                                               | Plateforme de testing Namuroise                                                                                          | Degossérie Jonathan; Demars Aurore; Denis Olivier; Lesly NYINKEU K.; Lesly NYINKEU KEMAMEN; Lesly Nyinkeu Kemamen; Maschietto Céline; Mullier François; Nicolas GILLIARD; Nicolas Gilliard; Nobis Chloé; Otto Gaetan                                                                                                                                                                                                                                                                                                                                                                                                                                                                                                                                                                                                                                                                                                                                                                                                                                                                        |
| EPI_ISL_1443706, EPI_ISL_1745199, EPI_ISL_2016711, EPI_ISL_2016712, EPI_ISL_2016714, EPI_ISL_2016715, EPI_ISL_2047646, EPI_ISL_2047647, EPI_ISL_2047648, EPI_ISL_2047649, EPI_ISL_2047650, EPI_ISL_2047651, EPI_ISL_2047652, EPI_ISL_2047653, EPI_ISL_2047654, EPI_ISL_2047655, EPI_ISL_2047656, EPI_ISL_2047657, EPI_ISL_2047658, EPI_ISL_2047659, EPI_ISL_2047662, EPI_ISL_2131296, EPI_ISL_2131297, EPI_ISL_2131298, EPI_ISL_2131303, EPI_ISL_2131305, EPI_ISL_2131345, EPI_ISL_2134689, EPI_ISL_2246063, EPI_ISL_2246064, EPI_ISL_2246065, EPI_ISL_2246066, EPI_ISL_2246103, EPI_ISL_2246115, EPI_ISL_2246121, EPI_ISL_2272670, EPI_ISL_2272671, EPI_ISL_2272672, EPI_ISL_2272673, EPI_ISL_2272674, EPI_ISL_2272675, EPI_ISL_2272676, EPI_ISL_2272677, EPI_ISL_2272678, EPI_ISL_2272679, EPI_ISL_2272680, EPI_ISL_2272681, EPI_ISL_2272682, EPI_ISL_2272683, EPI_ISL_2272684, EPI_ISL_2272685, EPI_ISL_2272686, EPI_ISL_2272687, EPI_ISL_2272688, EPI_ISL_2272689, EPI_ISL_2272690, EPI_ISL_2272691, EPI_ISL_2272692, EPI_ISL_2272693, EPI_ISL_2272694, EPI_ISL_2272695, EPI_ISL_2272696, EPI_ISL_2272697, EPI_ISL_2272698, EPI_ISL_2272699, EPI_ISL_2272700, EPI_ISL_2272701, EPI_ISL_2272702, EPI_ISL_2272703, EPI_ISL_2272704, EPI_ISL_2272705, EPI_ISL_2272706, EPI_ISL_2272707, EPI_ISL_2272708, EPI_ISL_2272709, EPI_ISL_2272710, EPI_ISL_2272711, EPI_ISL_2272712, EPI_ISL_2272713, EPI_ISL_2272714, EPI_ISL_2272715, EPI_ISL_2272716, EPI_ISL_2272717, EPI_ISL_2272718, EPI_ISL_2272719, EPI_ISL_2272720, EPI_ISL_2272721, EPI_ISL_2272722, EPI_ISL_2292727, EPI_ISL_2292728, EPI_ISL_2331830, EPI_ISL_2362614, EPI_ISL_2362616, EPI_ISL_2362624, EPI_ISL_2362625, EPI_ISL_2422173, EPI_ISL_2422181, EPI_ISL_2443384, EPI_ISL_2545595, EPI_ISL_2545603, EPI_ISL_2545604, EPI_ISL_2545607, EPI_ISL_2545608, EPI_ISL_2545612, EPI_ISL_2545634, EPI_ISL_2545635, EPI_ISL_2545642, EPI_ISL_2545645, EPI_ISL_2545647, EPI_ISL_2545648, EPI_ISL_2545649, EPI_ISL_2545650, EPI_ISL_2545651, EPI_ISL_2545652, EPI_ISL_2545653, EPI_ISL_2545654, EPI_ISL_2545655, EPI_ISL_2545656, EPI_ISL_2545657, EPI_ISL_2545658, EPI_ISL_2545659, EPI_ISL_2545660, EPI_ISL_2545661, EPI_ISL_2545662, EPI_ISL_2545663, EPI_ISL_2545664, EPI_ISL_2545665, EPI_ISL_2545666, EPI_ISL_2545667, EPI_ISL_2545668, EPI_ISL_2545669, EPI_ISL_2545670, EPI_ISL_2545671, EPI_ISL_2545672, EPI_ISL_2545673, EPI_ISL_2545674, EPI_ISL_2545675, EPI_ISL_2545676, EPI_ISL_2545677, EPI_ISL_2545678, EPI_ISL_2545679, EPI_ISL_2545680, EPI_ISL_2545681, EPI_ISL_2545682, EPI_ISL_2545683, EPI_ISL_2545684, EPI_ISL_2545685, EPI_ISL_2545686, EPI_ISL_2545687, EPI_ISL_2545688, EPI_ISL_2545689, EPI_ISL_2545690, EPI_ISL_2545691, EPI_ISL_2545692, EPI_ISL_2545693, EPI_ISL_2545694, EPI_ISL_2545695, EPI_ISL_2545696, EPI_ISL_2545697, EPI_ISL_2545698, EPI_ISL_2545699, EPI_ISL_2545700, EPI_ISL_2545701, EPI_ISL_2545702, EPI_ISL_2545703, EPI_ISL_2545704, EPI_ISL_2545705, EPI_ISL_2545706, EPI_ISL_2545707, EPI_ISL_2545708, EPI_ISL_2545709, EPI_ISL_2545710, EPI_ISL_2545711, EPI_ISL_2545712, EPI_ISL_2545713, EPI_ISL_2545714, EPI_ISL_2545715, EPI_ISL_2545716, EPI_ISL_2545717, EPI_ISL_2545718, EPI_ISL_2545719, EPI_ISL_2545720, EPI_ISL_2545721, EPI_ISL_2545722, EPI_ISL_2545723, EPI_ISL_2545724, EPI_ISL_2545725, EPI_ISL_2545726, EPI_ISL_2545727, EPI_ISL_2545728, EPI_ISL_2545729, EPI_ISL_2545730, EPI_ISL_2545731, EPI_ISL_2545732, EPI_ISL_2545733, EPI_ISL_2545734, EPI_ISL_2545735, EPI_ISL_2545736, EPI_ISL_2545737, EPI_ISL_2545738, EPI_ISL_2545739, EPI_ISL_2545740, EPI_ISL_2545741, EPI_ISL_2545742, EPI_ISL_2545743, EPI_ISL_2545744, EPI_ISL_2545745, EPI_ISL_2545746, EPI_ISL_2545747, EPI_ISL_2545748, EPI_ISL_2545749, EPI_ISL_2545750, EPI_ISL_2545751, EPI_ISL_2545752, EPI_ISL_2545753, EPI_ISL_2545754, EPI_ISL_2545755, EPI_ISL_2545756, EPI_ISL_2545757, EPI_ISL_2545758, EPI_ISL_2545759, EPI_ISL_2545760, EPI_ISL_2545761, EPI_ISL_2545762, EPI_ISL_2545763, EPI_ISL_2545764, EPI_ISL_2545765, EPI_ISL_2545766, EPI_ISL_2545767, EPI_ISL_2545768, EPI_ISL_2545769, EPI_ISL_2545770, EPI_ISL_2545771, EPI_ISL_2545772, EPI_ISL_2545773, EPI_ISL_2545774, EPI_ISL_2545775, EPI_ISL_2545776, EPI_ISL_2545777, EPI_ISL_2545778, EPI_ISL_2545779, EPI_ISL_2545780, EPI_ISL_2545781, EPI_ISL_2545782, EPI_ISL_2545783, EPI_ISL_2545784, EPI_ISL_2545785, EPI_ISL_2545786, EPI_ISL_2545787, EPI_ISL_2545788, EPI_ISL_2545789, EPI_ISL_2545790, EPI_ISL_2545791, EPI_ISL_2545792, EPI_ISL_2545793, EPI_ISL_2545794, EPI_ISL_2545795, EPI_ISL_2545796, EPI_ISL_2545797, EPI_ISL_2545798, EPI_ISL_2545799, EPI_ISL_2545800, EPI_ISL_2545801, EPI_ISL_2545802, EPI_ISL_2545803, EPI_ISL_2545804, EPI_ISL_2545805, EPI_ISL_2545806, EPI_ISL_2545807, EPI_ISL_2545808, EPI_ISL_2545809, EPI_ISL_2545810, EPI_ISL_2545811, EPI_ISL_2545812, EPI_ISL_2545813, EPI_ISL_2545814, EPI_ISL_2545815, EPI_ISL_2545816, EPI_ISL_2545817, EPI_ISL_2545818, EPI_ISL_2545819, EPI_ISL_2545820, EPI_ISL_2545821, EPI_ISL_2545822, EPI_ISL_2545823, EPI_ISL_2545824, EPI_ISL_2545825, EPI_ISL_2545826, EPI_ISL_2545827, EPI_ISL_2545828, EPI_ISL_2545829, EPI_ISL_2545830, EPI_ISL_2545831, EPI_ISL_2545832, EPI_ISL_2545833, EPI_ISL_2545834, EPI_ISL_2545835, EPI_ISL_2545836, EPI_ISL_2545837, EPI_ISL_2545838, EPI_ISL_2545839, EPI_ISL_2545840, EPI_ISL_2545841, EPI_ISL_2545842, EPI_ISL_2545843, EPI_ISL_2545844, EPI_ISL_2545845, EPI_ISL_2545846, EPI_ISL_2545847, EPI_ISL_2545848, EPI_ISL_2545849, EPI_ISL_2545850, EPI_ISL_2545851, EPI_ISL_2545852, EPI_ISL_2545853, EPI_ISL_2545854, EPI_ISL_2545855, EPI_ISL_2545856, EPI_ISL_2545857, EPI_ISL_2545858, EPI_ISL_2545859, EPI_ISL_2545860, EPI_ISL_2545861, EPI_ISL_2545862, EPI_ISL_2545863, EPI_ISL_2545864, EPI_ISL_2545865, EPI_ISL_2545866, EPI_ISL_2545867, EPI_ISL_2545868, EPI_ISL_2545869, EPI_ISL_2545870, EPI_ISL_2545871, EPI_ISL_2545872, EPI_ISL_2545873, EPI_ISL_2545874, EPI_ISL_2545875, EPI_ISL_2545876, EPI_ISL_2545877, EPI_ISL_2545878, EPI_ISL_2545879, EPI_ISL_2545880, EPI_ISL_2545881, EPI_ISL_2545882, EPI_ISL_2545883, EPI_ISL_2545884, EPI_ISL_2545885, EPI_ISL_2545886, EPI_ISL_2545887, EPI_ISL_2545888, EPI_ISL_2545889, EPI_ISL_2545890, EPI_ISL_2545891, EPI_ISL_2545892, EPI_ISL_2545893, EPI_ISL_2545894, EPI_ISL_2545895, EPI_ISL_2545896, EPI_ISL_2545897, EPI_ISL_2545898, EPI_ISL_2545899, EPI_ISL_2545900, EPI_ISL_2545901, EPI_ISL_2545902, EPI_ISL_2545903, EPI_ISL_2545904, EPI_ISL_2545905, EPI_ISL_2545906, EPI_ISL_2545907, EPI_ISL_2545908, EPI_ISL_2545909, EPI_ISL_2545910, EPI_ISL_2545911, EPI_ISL_2545912, EPI_ISL_2545913, EPI_ISL_2545914, EPI_ISL_2545915, EPI_ISL_2545916, EPI_ISL_2545917, EPI_ISL_2545918, EPI_ISL_2545919, EPI_ISL_2545920, EPI_ISL_2545921 | Platform BIS UZA/UAntwerpen                                                   | Labo Klinische Biologie, UZA                                                                                             | Basil Britto Xavier; Christine Lammens; Herman Goossens; Ines Verbesselt; Jasmine Coppens; Kathleen Holemans; Marie Le Mercier; Veerle Matheusssen                                                                                                                                                                                                                                                                                                                                                                                                                                                                                                                                                                                                                                                                                                                                                                                                                                                                                                                                          |
| EPI_ISL_2178964                                                                                                                                                                                                                                                                                                                                                                                                                                                                                                                                                                                                                                                                                                                                                                                                                                                                                                                                                                                                                                                                                                                                                                                                                                                                                                                                                                                                                                                                                                                                                                                                                                                                                                                                                                                                                                                                                                                                                                                                                                                                                                                                                                                                                                                                                                                                                                                                                                                                                                                                                                                                                                                                                                                                                                                                                                                                                                                                                                                                                                                                                                                                                                                                                                                                                                                                                                                                                                                                                                                                                                                                                                                                                                                                                                                                                                                                                                                                                                                                                                                                                                                                                                                                                                                                                                                                                                                                                                                                                                                                                                                                                                                                                                                                                                                                                                                                                                                                                                                                                                                                                                                                                                                                                                                                                                                                                                                                                                                                                                                                                                                                                                                                                                                                                                                                                                                                                                                                                                                                                                                                                                                                                                                                                                                                                                                                                                                                                                                                                                                                                                                                                                                                                                                                                               | Praava Health                                                                 | Child Health Research Foundation                                                                                         | CHRF Bangladesh Genomics Team; Shafiqul Azam; Zaheed Husain                                                                                                                                                                                                                                                                                                                                                                                                                                                                                                                                                                                                                                                                                                                                                                                                                                                                                                                                                                                                                                 |
| EPI_ISL_1819254, EPI_ISL_2757688                                                                                                                                                                                                                                                                                                                                                                                                                                                                                                                                                                                                                                                                                                                                                                                                                                                                                                                                                                                                                                                                                                                                                                                                                                                                                                                                                                                                                                                                                                                                                                                                                                                                                                                                                                                                                                                                                                                                                                                                                                                                                                                                                                                                                                                                                                                                                                                                                                                                                                                                                                                                                                                                                                                                                                                                                                                                                                                                                                                                                                                                                                                                                                                                                                                                                                                                                                                                                                                                                                                                                                                                                                                                                                                                                                                                                                                                                                                                                                                                                                                                                                                                                                                                                                                                                                                                                                                                                                                                                                                                                                                                                                                                                                                                                                                                                                                                                                                                                                                                                                                                                                                                                                                                                                                                                                                                                                                                                                                                                                                                                                                                                                                                                                                                                                                                                                                                                                                                                                                                                                                                                                                                                                                                                                                                                                                                                                                                                                                                                                                                                                                                                                                                                                                                              | Presidio di Brindisi Di Summa - Perrino                                       | Istituto Zooprofilattico Sperimentale della Puglia e della Basilicata                                                    | Bianco A.; Capozzi L.; Del Sambre L.; Difato L.; Giannico A.; Parisi A.; Ridolfi D.; Santoro A.; Simone D.                                                                                                                                                                                                                                                                                                                                                                                                                                                                                                                                                                                                                                                                                                                                                                                                                                                                                                                                                                                  |
| EPI_ISL_2341679, EPI_ISL_2341692, EPI_ISL_2341693, EPI_ISL_2341708, EPI_ISL_2341709, EPI_ISL_2341721, EPI_ISL_2341722, EPI_ISL_2341724, EPI_ISL_2341790, EPI_ISL_2341862, EPI_ISL_2341863, EPI_ISL_2341864, EPI_ISL_2341866, EPI_ISL_2341869, EPI_ISL_2341872, EPI_ISL_2341873, EPI_ISL_2341875, EPI_ISL_2341877, EPI_ISL_2341880, EPI_ISL_2341881, EPI_ISL_2341883, EPI_ISL_2341885, EPI_ISL_2341887, EPI_ISL_2341889, EPI_ISL_2341890, EPI_ISL_2341891, EPI_ISL_2341892, EPI_ISL_2341896, EPI_ISL_2341897, EPI_ISL_2341898, EPI_ISL_2341899, EPI_ISL_2341900, EPI_ISL_2341901, EPI_ISL_2341902, EPI_ISL_2341904, EPI_ISL_2341905, EPI_ISL_2341906, EPI_ISL_2341907, EPI_ISL_2341909, EPI_ISL_2341910, EPI_ISL_2341911, EPI_ISL_2341912, EPI_ISL_2341913, EPI_ISL_2341914, EPI_ISL_2341920, EPI_ISL_2341921                                                                                                                                                                                                                                                                                                                                                                                                                                                                                                                                                                                                                                                                                                                                                                                                                                                                                                                                                                                                                                                                                                                                                                                                                                                                                                                                                                                                                                                                                                                                                                                                                                                                                                                                                                                                                                                                                                                                                                                                                                                                                                                                                                                                                                                                                                                                                                                                                                                                                                                                                                                                                                                                                                                                                                                                                                                                                                                                                                                                                                                                                                                                                                                                                                                                                                                                                                                                                                                                                                                                                                                                                                                                                                                                                                                                                                                                                                                                                                                                                                                                                                                                                                                                                                                                                                                                                                                                                                                                                                                                                                                                                                                                                                                                                                                                                                                                                                                                                                                                                                                                                                                                                                                                                                                                                                                                                                                                                                                                                                                                                                                                                                                                                                                                                                                                                                                                                                                                                                  | Pt. Jawahar Lal Nehru Memorial Medical College, Raipur                        | Institute of Life Sciences - INSACOG                                                                                     | Ajay Parida; Amol M. Kanampalliwar; Arup Ghosh; Atimukta Jha; INSACOG Consortium; Omprakash Shiriwasi; Punit Prasad; Rajeeb Swain; Rupesh Dash; Safal Wallia; Sana Fatma; Shifu Aggarwal; Sunil K. Raghav                                                                                                                                                                                                                                                                                                                                                                                                                                                                                                                                                                                                                                                                                                                                                                                                                                                                                   |
| EPI_ISL_1311998                                                                                                                                                                                                                                                                                                                                                                                                                                                                                                                                                                                                                                                                                                                                                                                                                                                                                                                                                                                                                                                                                                                                                                                                                                                                                                                                                                                                                                                                                                                                                                                                                                                                                                                                                                                                                                                                                                                                                                                                                                                                                                                                                                                                                                                                                                                                                                                                                                                                                                                                                                                                                                                                                                                                                                                                                                                                                                                                                                                                                                                                                                                                                                                                                                                                                                                                                                                                                                                                                                                                                                                                                                                                                                                                                                                                                                                                                                                                                                                                                                                                                                                                                                                                                                                                                                                                                                                                                                                                                                                                                                                                                                                                                                                                                                                                                                                                                                                                                                                                                                                                                                                                                                                                                                                                                                                                                                                                                                                                                                                                                                                                                                                                                                                                                                                                                                                                                                                                                                                                                                                                                                                                                                                                                                                                                                                                                                                                                                                                                                                                                                                                                                                                                                                                                               | Public Health Institute of Zagreb County                                      | Croatian Institute of Public Health                                                                                      | Irena Tabain; Ivana Ferenčak                                                                                                                                                                                                                                                                                                                                                                                                                                                                                                                                                                                                                                                                                                                                                                                                                                                                                                                                                                                                                                                                |
| EPI_ISL_849681, EPI_ISL_849682, EPI_ISL_849685, EPI_ISL_849694                                                                                                                                                                                                                                                                                                                                                                                                                                                                                                                                                                                                                                                                                                                                                                                                                                                                                                                                                                                                                                                                                                                                                                                                                                                                                                                                                                                                                                                                                                                                                                                                                                                                                                                                                                                                                                                                                                                                                                                                                                                                                                                                                                                                                                                                                                                                                                                                                                                                                                                                                                                                                                                                                                                                                                                                                                                                                                                                                                                                                                                                                                                                                                                                                                                                                                                                                                                                                                                                                                                                                                                                                                                                                                                                                                                                                                                                                                                                                                                                                                                                                                                                                                                                                                                                                                                                                                                                                                                                                                                                                                                                                                                                                                                                                                                                                                                                                                                                                                                                                                                                                                                                                                                                                                                                                                                                                                                                                                                                                                                                                                                                                                                                                                                                                                                                                                                                                                                                                                                                                                                                                                                                                                                                                                                                                                                                                                                                                                                                                                                                                                                                                                                                                                                | Public Health Virology Laboratory, Forensic and Scientific Services (PHV-FSS) | Public Health Virology Laboratory, Forensic and Scientific Services (PHV-FSS)                                            | Son Nguyen et al                                                                                                                                                                                                                                                                                                                                                                                                                                                                                                                                                                                                                                                                                                                                                                                                                                                                                                                                                                                                                                                                            |
| EPI_ISL_985234, EPI_ISL_1061309, EPI_ISL_1061310, EPI_ISL_1098644, EPI_ISL_1098645, EPI_ISL_1121040, EPI_ISL_1137503, EPI_ISL_1137505, EPI_ISL_1804614                                                                                                                                                                                                                                                                                                                                                                                                                                                                                                                                                                                                                                                                                                                                                                                                                                                                                                                                                                                                                                                                                                                                                                                                                                                                                                                                                                                                                                                                                                                                                                                                                                                                                                                                                                                                                                                                                                                                                                                                                                                                                                                                                                                                                                                                                                                                                                                                                                                                                                                                                                                                                                                                                                                                                                                                                                                                                                                                                                                                                                                                                                                                                                                                                                                                                                                                                                                                                                                                                                                                                                                                                                                                                                                                                                                                                                                                                                                                                                                                                                                                                                                                                                                                                                                                                                                                                                                                                                                                                                                                                                                                                                                                                                                                                                                                                                                                                                                                                                                                                                                                                                                                                                                                                                                                                                                                                                                                                                                                                                                                                                                                                                                                                                                                                                                                                                                                                                                                                                                                                                                                                                                                                                                                                                                                                                                                                                                                                                                                                                                                                                                                                        |                                                                               |                                                                                                                          |                                                                                                                                                                                                                                                                                                                                                                                                                                                                                                                                                                                                                                                                                                                                                                                                                                                                                                                                                                                                                                                                                             |
| see above                                                                                                                                                                                                                                                                                                                                                                                                                                                                                                                                                                                                                                                                                                                                                                                                                                                                                                                                                                                                                                                                                                                                                                                                                                                                                                                                                                                                                                                                                                                                                                                                                                                                                                                                                                                                                                                                                                                                                                                                                                                                                                                                                                                                                                                                                                                                                                                                                                                                                                                                                                                                                                                                                                                                                                                                                                                                                                                                                                                                                                                                                                                                                                                                                                                                                                                                                                                                                                                                                                                                                                                                                                                                                                                                                                                                                                                                                                                                                                                                                                                                                                                                                                                                                                                                                                                                                                                                                                                                                                                                                                                                                                                                                                                                                                                                                                                                                                                                                                                                                                                                                                                                                                                                                                                                                                                                                                                                                                                                                                                                                                                                                                                                                                                                                                                                                                                                                                                                                                                                                                                                                                                                                                                                                                                                                                                                                                                                                                                                                                                                                                                                                                                                                                                                                                     | Public Health Virology-Forensic and Scientific Services                       | Public Health Virology-Forensic and Scientific Services                                                                  | Alyssa T. Pyke et al.; Son Nguyen; Son Nguyen et al                                                                                                                                                                                                                                                                                                                                                                                                                                                                                                                                                                                                                                                                                                                                                                                                                                                                                                                                                                                                                                         |
| EPI_ISL_962180, EPI_ISL_1273080, EPI_ISL_1306128, EPI_ISL_1306131, EPI_ISL_1306132, EPI_ISL_1306134, EPI_ISL_1404917, EPI_ISL_1465888, EPI_ISL_1483028, EPI_ISL_1483029, EPI_ISL_1483031, EPI_ISL_1516882, EPI_ISL_1516883, EPI_ISL_1516884, EPI_ISL_1633659, EPI_ISL_1754856, EPI_ISL_1754859, EPI_ISL_1754866, EPI_ISL_1754867                                                                                                                                                                                                                                                                                                                                                                                                                                                                                                                                                                                                                                                                                                                                                                                                                                                                                                                                                                                                                                                                                                                                                                                                                                                                                                                                                                                                                                                                                                                                                                                                                                                                                                                                                                                                                                                                                                                                                                                                                                                                                                                                                                                                                                                                                                                                                                                                                                                                                                                                                                                                                                                                                                                                                                                                                                                                                                                                                                                                                                                                                                                                                                                                                                                                                                                                                                                                                                                                                                                                                                                                                                                                                                                                                                                                                                                                                                                                                                                                                                                                                                                                                                                                                                                                                                                                                                                                                                                                                                                                                                                                                                                                                                                                                                                                                                                                                                                                                                                                                                                                                                                                                                                                                                                                                                                                                                                                                                                                                                                                                                                                                                                                                                                                                                                                                                                                                                                                                                                                                                                                                                                                                                                                                                                                                                                                                                                                                                              | Public Health Virology-Forensic and Scientific Services (PHV-FSS)             | Public Health Virology-Forensic and Scientific Services (PHV-FSS)                                                        | Son Nguyen; Son Nguyen et al                                                                                                                                                                                                                                                                                                                                                                                                                                                                                                                                                                                                                                                                                                                                                                                                                                                                                                                                                                                                                                                                |
| see above                                                                                                                                                                                                                                                                                                                                                                                                                                                                                                                                                                                                                                                                                                                                                                                                                                                                                                                                                                                                                                                                                                                                                                                                                                                                                                                                                                                                                                                                                                                                                                                                                                                                                                                                                                                                                                                                                                                                                                                                                                                                                                                                                                                                                                                                                                                                                                                                                                                                                                                                                                                                                                                                                                                                                                                                                                                                                                                                                                                                                                                                                                                                                                                                                                                                                                                                                                                                                                                                                                                                                                                                                                                                                                                                                                                                                                                                                                                                                                                                                                                                                                                                                                                                                                                                                                                                                                                                                                                                                                                                                                                                                                                                                                                                                                                                                                                                                                                                                                                                                                                                                                                                                                                                                                                                                                                                                                                                                                                                                                                                                                                                                                                                                                                                                                                                                                                                                                                                                                                                                                                                                                                                                                                                                                                                                                                                                                                                                                                                                                                                                                                                                                                                                                                                                                     | Public Health Virology-Forensic and Scientific Services (PHV-FSS)             | Public Health Virology-Forensic and Scientific Services (PHV-FSS)                                                        |                                                                                                                                                                                                                                                                                                                                                                                                                                                                                                                                                                                                                                                                                                                                                                                                                                                                                                                                                                                                                                                                                             |
| EPI_ISL_513133                                                                                                                                                                                                                                                                                                                                                                                                                                                                                                                                                                                                                                                                                                                                                                                                                                                                                                                                                                                                                                                                                                                                                                                                                                                                                                                                                                                                                                                                                                                                                                                                                                                                                                                                                                                                                                                                                                                                                                                                                                                                                                                                                                                                                                                                                                                                                                                                                                                                                                                                                                                                                                                                                                                                                                                                                                                                                                                                                                                                                                                                                                                                                                                                                                                                                                                                                                                                                                                                                                                                                                                                                                                                                                                                                                                                                                                                                                                                                                                                                                                                                                                                                                                                                                                                                                                                                                                                                                                                                                                                                                                                                                                                                                                                                                                                                                                                                                                                                                                                                                                                                                                                                                                                                                                                                                                                                                                                                                                                                                                                                                                                                                                                                                                                                                                                                                                                                                                                                                                                                                                                                                                                                                                                                                                                                                                                                                                                                                                                                                                                                                                                                                                                                                                                                                | Public Health, United States Air Force School of Aerospace Medicine           | Public Health, United States Air Force School of Aerospace Medicine                                                      | A.C.; A.K.; A.W.; B.C.; C.R.; Chappleau; Connors; E.A.; Fries; J.R.; Javorina; Lambert; Macias; Meyer; Purves; R.R. and Starr; S.M.                                                                                                                                                                                                                                                                                                                                                                                                                                                                                                                                                                                                                                                                                                                                                                                                                                                                                                                                                         |
| EPI_ISL_574610                                                                                                                                                                                                                                                                                                                                                                                                                                                                                                                                                                                                                                                                                                                                                                                                                                                                                                                                                                                                                                                                                                                                                                                                                                                                                                                                                                                                                                                                                                                                                                                                                                                                                                                                                                                                                                                                                                                                                                                                                                                                                                                                                                                                                                                                                                                                                                                                                                                                                                                                                                                                                                                                                                                                                                                                                                                                                                                                                                                                                                                                                                                                                                                                                                                                                                                                                                                                                                                                                                                                                                                                                                                                                                                                                                                                                                                                                                                                                                                                                                                                                                                                                                                                                                                                                                                                                                                                                                                                                                                                                                                                                                                                                                                                                                                                                                                                                                                                                                                                                                                                                                                                                                                                                                                                                                                                                                                                                                                                                                                                                                                                                                                                                                                                                                                                                                                                                                                                                                                                                                                                                                                                                                                                                                                                                                                                                                                                                                                                                                                                                                                                                                                                                                                                                                | Puskesmas Tambora                                                             | Eijkman Institute for Molecular Biology, Ministry of Research and Technology/National Agency for Research and Innovation | Amin Seobandrio; David H Muljono; Edison Johar; Frianisa A Yudhaputri; Herawati Sudoyo; Hidayat Trimarsanto; Iskandar A Adnan; Khrn Saw Maity; Saffarina G Malik; Willy Agustine                                                                                                                                                                                                                                                                                                                                                                                                                                                                                                                                                                                                                                                                                                                                                                                                                                                                                                            |
| EPI_ISL_1055469, EPI_ISL_1055689, EPI_ISL_1055691, EPI_ISL_1055692                                                                                                                                                                                                                                                                                                                                                                                                                                                                                                                                                                                                                                                                                                                                                                                                                                                                                                                                                                                                                                                                                                                                                                                                                                                                                                                                                                                                                                                                                                                                                                                                                                                                                                                                                                                                                                                                                                                                                                                                                                                                                                                                                                                                                                                                                                                                                                                                                                                                                                                                                                                                                                                                                                                                                                                                                                                                                                                                                                                                                                                                                                                                                                                                                                                                                                                                                                                                                                                                                                                                                                                                                                                                                                                                                                                                                                                                                                                                                                                                                                                                                                                                                                                                                                                                                                                                                                                                                                                                                                                                                                                                                                                                                                                                                                                                                                                                                                                                                                                                                                                                                                                                                                                                                                                                                                                                                                                                                                                                                                                                                                                                                                                                                                                                                                                                                                                                                                                                                                                                                                                                                                                                                                                                                                                                                                                                                                                                                                                                                                                                                                                                                                                                                                            | QEII Health Sciences Centre                                                   | National Microbiology Laboratory (NML)                                                                                   | Anna Majer; Anneliese Landgraff; CanCOGeN's metadata curation team; Dan Gaston; Darian Hole; Elsie Grudski; Gary Van Domselaar; Grace Seo; Janice Pettipas; Jason LeBlanc; Jennifer Tanner; Kirsten Biggar; Madison Chapel; Morag Graham; Natalie Knox; Nathalie Bastien; Philip Mabon; Public Health Agency of Canada CanCOGeN team; Rhianonn Huzarewicz; Russell Mandes; Shari Tyson; Timothy Booth; Todd Hatchette; Yan Li                                                                                                                                                                                                                                                                                                                                                                                                                                                                                                                                                                                                                                                               |
| EPI_ISL_1832826, EPI_ISL_2519075, EPI_ISL_2519268, EPI_ISL_2519546, EPI_ISL_2519813, EPI_ISL_2519976, EPI_ISL_2520006, EPI_ISL_2520053, EPI_ISL_2520132, EPI_ISL_2520136, EPI_ISL_2623665, EPI_ISL_2623697, EPI_ISL_2623698, EPI_ISL_2624029, EPI_ISL_2624085, EPI_ISL_2624196, EPI_ISL_2624375, EPI_ISL_2706713, EPI_ISL_2706718, EPI_ISL_2706880, E                                                                                                                                                                                                                                                                                                                                                                                                                                                                                                                                                                                                                                                                                                                                                                                                                                                                                                                                                                                                                                                                                                                                                                                                                                                                                                                                                                                                                                                                                                                                                                                                                                                                                                                                                                                                                                                                                                                                                                                                                                                                                                                                                                                                                                                                                                                                                                                                                                                                                                                                                                                                                                                                                                                                                                                                                                                                                                                                                                                                                                                                                                                                                                                                                                                                                                                                                                                                                                                                                                                                                                                                                                                                                                                                                                                                                                                                                                                                                                                                                                                                                                                                                                                                                                                                                                                                                                                                                                                                                                                                                                                                                                                                                                                                                                                                                                                                                                                                                                                                                                                                                                                                                                                                                                                                                                                                                                                                                                                                                                                                                                                                                                                                                                                                                                                                                                                                                                                                                                                                                                                                                                                                                                                                                                                                                                                                                                                                                         |                                                                               |                                                                                                                          |                                                                                                                                                                                                                                                                                                                                                                                                                                                                                                                                                                                                                                                                                                                                                                                                                                                                                                                                                                                                                                                                                             |

|                                                                                                                                                                                                                                                                                                                                                                                                                                                                                                                                                                                                                                                                                                                                                                                                                                                                                                                                                                                                                                                                                                                                                                                                                                                                                                                                                                                                                                                                                                                                                                                                                                                                                                                                  |                                                                                                                         |                                                                                                                                                                                                                                                                                                                                                                                                                                                                                     |                                                                                                                                                                                                                                                                                                                                                                                                                                                                                                                                                                   |                  |
|----------------------------------------------------------------------------------------------------------------------------------------------------------------------------------------------------------------------------------------------------------------------------------------------------------------------------------------------------------------------------------------------------------------------------------------------------------------------------------------------------------------------------------------------------------------------------------------------------------------------------------------------------------------------------------------------------------------------------------------------------------------------------------------------------------------------------------------------------------------------------------------------------------------------------------------------------------------------------------------------------------------------------------------------------------------------------------------------------------------------------------------------------------------------------------------------------------------------------------------------------------------------------------------------------------------------------------------------------------------------------------------------------------------------------------------------------------------------------------------------------------------------------------------------------------------------------------------------------------------------------------------------------------------------------------------------------------------------------------|-------------------------------------------------------------------------------------------------------------------------|-------------------------------------------------------------------------------------------------------------------------------------------------------------------------------------------------------------------------------------------------------------------------------------------------------------------------------------------------------------------------------------------------------------------------------------------------------------------------------------|-------------------------------------------------------------------------------------------------------------------------------------------------------------------------------------------------------------------------------------------------------------------------------------------------------------------------------------------------------------------------------------------------------------------------------------------------------------------------------------------------------------------------------------------------------------------|------------------|
| EPI_ISL_2624424, EPI_ISL_2624524                                                                                                                                                                                                                                                                                                                                                                                                                                                                                                                                                                                                                                                                                                                                                                                                                                                                                                                                                                                                                                                                                                                                                                                                                                                                                                                                                                                                                                                                                                                                                                                                                                                                                                 |                                                                                                                         |                                                                                                                                                                                                                                                                                                                                                                                                                                                                                     |                                                                                                                                                                                                                                                                                                                                                                                                                                                                                                                                                                   | Son Nguyen et al |
| EPI_ISL_530236, EPI_ISL_530245, EPI_ISL_530254, EPI_ISL_530277                                                                                                                                                                                                                                                                                                                                                                                                                                                                                                                                                                                                                                                                                                                                                                                                                                                                                                                                                                                                                                                                                                                                                                                                                                                                                                                                                                                                                                                                                                                                                                                                                                                                   | Queensland Health Forensic and Scientific Services, Public Health Virology                                              | Public Health Virology Laboratory, Forensic and Scientific Services, Queensland Health                                                                                                                                                                                                                                                                                                                                                                                              |                                                                                                                                                                                                                                                                                                                                                                                                                                                                                                                                                                   |                  |
| EPI_ISL_415642, EPI_ISL_415644                                                                                                                                                                                                                                                                                                                                                                                                                                                                                                                                                                                                                                                                                                                                                                                                                                                                                                                                                                                                                                                                                                                                                                                                                                                                                                                                                                                                                                                                                                                                                                                                                                                                                                   | R. G. Luger Center for Public Health Research, National Center for Disease Control and Public Health (NCDC) of Georgia. | R. G. Luger Center for Public Health Research, National Center for Disease Control and Public Health (NCDC) of Georgia.                                                                                                                                                                                                                                                                                                                                                             | Adam Kotorashvili; Amiran Gamkrelidze.; Ana Pakpiauri; Ann Machabishvili; Anna Kasradze; Davit Tsaguria; Ekaterine Khmaladze; Ekaterine Zangaladze; Ekaterine Zhghenti; Giorgi Tomashvili; Gvantsa Brachveli; Gvantsa Chanturia; Irma Burjanadze; Ketevan Sidamonidze; Khatuna Zakhashvili; Lela Sabadze; Lela Urushadze; Magda Dgebuadze; Maia Alkhashashvili; Mari Gavashelidze; Mariam Zakalashvili; Marine Murtskhvaladze; Meri Pantsulaia; Nato Kotaria; Nino Berishvili; Paata Imnadze; Roena Sukhiashvili; Tamar Jashishvili; Tata Imnadze; Tea Tevdoradze |                  |
| EPI_ISL_2379315, EPI_ISL_2379316, EPI_ISL_2379318, EPI_ISL_2379320, EPI_ISL_2379321, EPI_ISL_2450340, EPI_ISL_2450341, EPI_ISL_2450342                                                                                                                                                                                                                                                                                                                                                                                                                                                                                                                                                                                                                                                                                                                                                                                                                                                                                                                                                                                                                                                                                                                                                                                                                                                                                                                                                                                                                                                                                                                                                                                           |                                                                                                                         |                                                                                                                                                                                                                                                                                                                                                                                                                                                                                     |                                                                                                                                                                                                                                                                                                                                                                                                                                                                                                                                                                   |                  |
| see above                                                                                                                                                                                                                                                                                                                                                                                                                                                                                                                                                                                                                                                                                                                                                                                                                                                                                                                                                                                                                                                                                                                                                                                                                                                                                                                                                                                                                                                                                                                                                                                                                                                                                                                        | RAILWAY                                                                                                                 | INSACOG-KA, NIMHANS                                                                                                                                                                                                                                                                                                                                                                                                                                                                 | Ananthapadmanabha Kotambail; Anita S Desai; Anson Kunjumon George; Chetan G K; Chitra Pattabiraman; Darshan Sreenivas; Gautham Arunachal Udupi; Pramada Prasad; V Ravi                                                                                                                                                                                                                                                                                                                                                                                            |                  |
| EPI_ISL_1940102, EPI_ISL_1940106                                                                                                                                                                                                                                                                                                                                                                                                                                                                                                                                                                                                                                                                                                                                                                                                                                                                                                                                                                                                                                                                                                                                                                                                                                                                                                                                                                                                                                                                                                                                                                                                                                                                                                 | RAILWAY                                                                                                                 | inStem NCBS - INSACOG                                                                                                                                                                                                                                                                                                                                                                                                                                                               | Uma Ramakrishnan Dasaradhi Palakodeti Aswin SaiNarain                                                                                                                                                                                                                                                                                                                                                                                                                                                                                                             |                  |
| EPI_ISL_2379347                                                                                                                                                                                                                                                                                                                                                                                                                                                                                                                                                                                                                                                                                                                                                                                                                                                                                                                                                                                                                                                                                                                                                                                                                                                                                                                                                                                                                                                                                                                                                                                                                                                                                                                  | RAILWAY H                                                                                                               | INSACOG-KA, NIMHANS                                                                                                                                                                                                                                                                                                                                                                                                                                                                 | Ananthapadmanabha Kotambail; Anita S Desai; Anson Kunjumon George; Chetan G K; Chitra Pattabiraman; Darshan Sreenivas; Gautham Arunachal Udupi; Pramada Prasad; V Ravi                                                                                                                                                                                                                                                                                                                                                                                            |                  |
| EPI_ISL_1940061                                                                                                                                                                                                                                                                                                                                                                                                                                                                                                                                                                                                                                                                                                                                                                                                                                                                                                                                                                                                                                                                                                                                                                                                                                                                                                                                                                                                                                                                                                                                                                                                                                                                                                                  | RAILWAY H                                                                                                               | inStem NCBS - INSACOG                                                                                                                                                                                                                                                                                                                                                                                                                                                               | Uma Ramakrishnan Dasaradhi Palakodeti Aswin SaiNarain                                                                                                                                                                                                                                                                                                                                                                                                                                                                                                             |                  |
| EPI_ISL_2450338, EPI_ISL_2728459, EPI_ISL_2728478, EPI_ISL_2728481, EPI_ISL_2728482, EPI_ISL_2728487, EPI_ISL_2728488, EPI_ISL_2728489, EPI_ISL_2728492, EPI_ISL_2728493, EPI_ISL_2728494, EPI_ISL_2728498, EPI_ISL_2728499, EPI_ISL_2728525, EPI_ISL_2728526, EPI_ISL_2728527, EPI_ISL_2728528                                                                                                                                                                                                                                                                                                                                                                                                                                                                                                                                                                                                                                                                                                                                                                                                                                                                                                                                                                                                                                                                                                                                                                                                                                                                                                                                                                                                                                  | RAILWAY HOSPITAL                                                                                                        | INSACOG-KA, NIMHANS                                                                                                                                                                                                                                                                                                                                                                                                                                                                 | Ananthapadmanabha Kotambail; Anita S Desai; Anson Kunjumon George; Chetan G K; Chitra Pattabiraman; Darshan Sreenivas; Ellango Ramasamy; Gautham Arunachal Udupi; Mahesh Kumar.C.S; Sony Sharma; V Ravi                                                                                                                                                                                                                                                                                                                                                           |                  |
| EPI_ISL_1663529, EPI_ISL_1663534                                                                                                                                                                                                                                                                                                                                                                                                                                                                                                                                                                                                                                                                                                                                                                                                                                                                                                                                                                                                                                                                                                                                                                                                                                                                                                                                                                                                                                                                                                                                                                                                                                                                                                 | REGIONAL VRDL, ICMR-RMRC BBSR                                                                                           | Institute of Life Sciences - INSACOG                                                                                                                                                                                                                                                                                                                                                                                                                                                | Ajay Parida; Amol M. Kanampalliwar; Arup Ghosh; Atimukta Jha; INSACOG Consortium; Punit Prasad; Rajeeb Swain; Rupesh Dash; Safal Walia; Shifu Aggarwal; Sunil K. Raghav                                                                                                                                                                                                                                                                                                                                                                                           |                  |
| EPI_ISL_2450330, EPI_ISL_2450331                                                                                                                                                                                                                                                                                                                                                                                                                                                                                                                                                                                                                                                                                                                                                                                                                                                                                                                                                                                                                                                                                                                                                                                                                                                                                                                                                                                                                                                                                                                                                                                                                                                                                                 | RH HOSAHALLI                                                                                                            | INSACOG-KA, NIMHANS                                                                                                                                                                                                                                                                                                                                                                                                                                                                 | Ananthapadmanabha Kotambail; Anita S Desai; Anson Kunjumon George; Chetan G K; Chitra Pattabiraman; Darshan Sreenivas; Gautham Arunachal Udupi; V Ravi                                                                                                                                                                                                                                                                                                                                                                                                            |                  |
| EPI_ISL_2531908, EPI_ISL_2531922                                                                                                                                                                                                                                                                                                                                                                                                                                                                                                                                                                                                                                                                                                                                                                                                                                                                                                                                                                                                                                                                                                                                                                                                                                                                                                                                                                                                                                                                                                                                                                                                                                                                                                 | RIIP                                                                                                                    | National Reference Center for Viruses of Respiratory Infections, Institut Pasteur, Paris                                                                                                                                                                                                                                                                                                                                                                                            | Angela Brisebarre; Camille Capel; Christophe Malabat; Corinne Maufrais; Etienne Simon-Lorière; Frédéric Lemoine; Louise Lefrançois; Marion Barbet; Maud Vanpeene; Méline Bizard; Stéphanie Guyomard-Rabenirina; Sylvie Behillil; Sylvie Van der Werf; Vincent Enouf                                                                                                                                                                                                                                                                                               |                  |
| EPI_ISL_2614728                                                                                                                                                                                                                                                                                                                                                                                                                                                                                                                                                                                                                                                                                                                                                                                                                                                                                                                                                                                                                                                                                                                                                                                                                                                                                                                                                                                                                                                                                                                                                                                                                                                                                                                  | RS Grha Kedoya                                                                                                          | Eijkman Institute for Molecular Biology, National Research and Innovation Agency                                                                                                                                                                                                                                                                                                                                                                                                    | Amin Soebandrio; Edison Johar; Frilasita A Yudhaputri; Hidayat Trimarsanto; Iskandar Adnan; Khin Saw Myint; Lidwina Priliani; Lydia V. Panggalo; Muhammad Rezki Rasyak; Safarina G Malik; Sukma Oktavianthi; Willy Agustine                                                                                                                                                                                                                                                                                                                                       |                  |
| EPI_ISL_574616                                                                                                                                                                                                                                                                                                                                                                                                                                                                                                                                                                                                                                                                                                                                                                                                                                                                                                                                                                                                                                                                                                                                                                                                                                                                                                                                                                                                                                                                                                                                                                                                                                                                                                                   | RS Kramat 128                                                                                                           | Eijkman Institute for Molecular Biology, Ministry of Research and Technology/National Agency for Research and Innovation                                                                                                                                                                                                                                                                                                                                                            | Amin Soebandrio; David H Muljono; Edison Johar; Frilasita A Yudhaputri; Herawati Sudoyo; Hidayat Trimarsanto; Iskandar A Adnan; Khin Saw Myint; Safarina G Malik; Willy Agustine                                                                                                                                                                                                                                                                                                                                                                                  |                  |
| EPI_ISL_833504                                                                                                                                                                                                                                                                                                                                                                                                                                                                                                                                                                                                                                                                                                                                                                                                                                                                                                                                                                                                                                                                                                                                                                                                                                                                                                                                                                                                                                                                                                                                                                                                                                                                                                                   | RS MMC, Jakarta, Indonesia                                                                                              | Biosafety Level-3 Laboratory, Indonesian Institute of Sciences (LIPI)                                                                                                                                                                                                                                                                                                                                                                                                               | Ade Andriani; Ahmad Fathoni; Ahmad Randy; Andri Wardiana; Anggia Prasetyoputri; Anik Budhi Dharmayanthi; Isa Nuryana; Listiana Oktavia; Ratih Asmana Ningrum; Syam Budi Iryanto                                                                                                                                                                                                                                                                                                                                                                                   |                  |
| EPI_ISL_2617493                                                                                                                                                                                                                                                                                                                                                                                                                                                                                                                                                                                                                                                                                                                                                                                                                                                                                                                                                                                                                                                                                                                                                                                                                                                                                                                                                                                                                                                                                                                                                                                                                                                                                                                  | RS Mitra Keluarga Kalideres                                                                                             | National Institute of Health Research and Development                                                                                                                                                                                                                                                                                                                                                                                                                               | Arie Ardiansyah Nugraha; Hana Apsari Pawestri; Hartanti Dian Ikawati; Kartika Dewi Puspa; Krisna Pangesti; Nelly Puspandari; Subangkit; Triyani Soekarso; Vivi Setiawaty                                                                                                                                                                                                                                                                                                                                                                                          |                  |
| EPI_ISL_1622425                                                                                                                                                                                                                                                                                                                                                                                                                                                                                                                                                                                                                                                                                                                                                                                                                                                                                                                                                                                                                                                                                                                                                                                                                                                                                                                                                                                                                                                                                                                                                                                                                                                                                                                  | RS Mitra Keluarga Kelapa Gading                                                                                         | Eijkman Institute for Molecular Biology, Ministry of Research and Technology/National Agency for Research and Innovation                                                                                                                                                                                                                                                                                                                                                            | Amin Soebandrio; Edison Johar; Frilasita A Yudhaputri; Hidayat Trimarsanto; Iskandar Adnan; Khin Saw Myint; Lydia V. Panggalo; Muhammad Rezki Rasyak; Safarina G Malik; Sukma Oktavianthi; Willy Agustine                                                                                                                                                                                                                                                                                                                                                         |                  |
| EPI_ISL_2631484                                                                                                                                                                                                                                                                                                                                                                                                                                                                                                                                                                                                                                                                                                                                                                                                                                                                                                                                                                                                                                                                                                                                                                                                                                                                                                                                                                                                                                                                                                                                                                                                                                                                                                                  | RS Primaya                                                                                                              | Indonesian Institute of Sciences (LIPI)/National Agency of Research and Innovation (BRIN) and National Institute of Health Research and Development (NIHRD)                                                                                                                                                                                                                                                                                                                         | Alfi T. Fathurahman; Andri Wardiana; Anggia Prasetyoputri; Anik B. Dharmayanthi; Asep M. Ridwanulloh; Erwin F. Hasrianda; Hariyatun; Ruby Setiawan; Subangkit; Sugiyono Saputra; Syam B. Iryanto; Vivi Setiawaty; Yayuk Sri Rahayu                                                                                                                                                                                                                                                                                                                                |                  |
| EPI_ISL_2262263                                                                                                                                                                                                                                                                                                                                                                                                                                                                                                                                                                                                                                                                                                                                                                                                                                                                                                                                                                                                                                                                                                                                                                                                                                                                                                                                                                                                                                                                                                                                                                                                                                                                                                                  | RS Umum Kartika Pulomas                                                                                                 | National Institute of Health Research and Development                                                                                                                                                                                                                                                                                                                                                                                                                               | Arie Ardiansyah Nugraha; Hana Apsari Pawestri; Hartanti Dian Ikawati; Kartika Dewi Puspa; Krisna Pangesti; Nelly Puspandari; Subangkit; Triyani Soekarso; Vivi Setiawaty                                                                                                                                                                                                                                                                                                                                                                                          |                  |
| EPI_ISL_2162130                                                                                                                                                                                                                                                                                                                                                                                                                                                                                                                                                                                                                                                                                                                                                                                                                                                                                                                                                                                                                                                                                                                                                                                                                                                                                                                                                                                                                                                                                                                                                                                                                                                                                                                  | RSE ON REM "National Center for Biotechnology"                                                                          | Reference laboratory for the control of viral infections                                                                                                                                                                                                                                                                                                                                                                                                                            | Aidar Ussebayev; Aknur Mutaliyeva; Andrey Komissarov; Artem Fadeev; Azamat Kenessov; Bekzhan Maikotov; Gaukhar Nussupbayeva; Madina Tleubergenova; Maria Pisareva; Nazym Tleumbetova                                                                                                                                                                                                                                                                                                                                                                              |                  |
| EPI_ISL_2614677                                                                                                                                                                                                                                                                                                                                                                                                                                                                                                                                                                                                                                                                                                                                                                                                                                                                                                                                                                                                                                                                                                                                                                                                                                                                                                                                                                                                                                                                                                                                                                                                                                                                                                                  | RSJ Dr. Soeharto Heerdjan                                                                                               | Eijkman Institute for Molecular Biology, National Research and Innovation Agency                                                                                                                                                                                                                                                                                                                                                                                                    | Amin Soebandrio; Edison Johar; Frilasita A Yudhaputri; Hidayat Trimarsanto; Iskandar Adnan; Khin Saw Myint; Lidwina Priliani; Lydia V. Panggalo; Muhammad Rezki Rasyak; Safarina G Malik; Sukma Oktavianthi; Willy Agustine                                                                                                                                                                                                                                                                                                                                       |                  |
| EPI_ISL_2262283, EPI_ISL_2262285                                                                                                                                                                                                                                                                                                                                                                                                                                                                                                                                                                                                                                                                                                                                                                                                                                                                                                                                                                                                                                                                                                                                                                                                                                                                                                                                                                                                                                                                                                                                                                                                                                                                                                 | RSPI Prof. Dr. Sulianti Saroso                                                                                          | National Institute of Health Research and Development                                                                                                                                                                                                                                                                                                                                                                                                                               | Arie Ardiansyah Nugraha; Hana Apsari Pawestri; Hartanti Dian Ikawati; Kartika Dewi Puspa; Krisna Pangesti; Nelly Puspandari; Subangkit; Triyani Soekarso; Vivi Setiawaty                                                                                                                                                                                                                                                                                                                                                                                          |                  |
| EPI_ISL_833392                                                                                                                                                                                                                                                                                                                                                                                                                                                                                                                                                                                                                                                                                                                                                                                                                                                                                                                                                                                                                                                                                                                                                                                                                                                                                                                                                                                                                                                                                                                                                                                                                                                                                                                   | RSU Sayang Bunda, Makasar,Indonesia                                                                                     | Biosafety Level-3 Laboratory, Indonesian Institute of Sciences (LIPI)                                                                                                                                                                                                                                                                                                                                                                                                               | Ade Andriani; Ahmad Fathoni; Andri Wardiana; Anggia Prasetyoputri; Anik Budhi Dharmayanthi; Dini Nurdiani; Isa Nuryana; Ratih Asmana Ningrum; Syam Budi Iryanto; Wahyuni                                                                                                                                                                                                                                                                                                                                                                                          |                  |
| EPI_ISL_2233089                                                                                                                                                                                                                                                                                                                                                                                                                                                                                                                                                                                                                                                                                                                                                                                                                                                                                                                                                                                                                                                                                                                                                                                                                                                                                                                                                                                                                                                                                                                                                                                                                                                                                                                  | RSUD Abdul Moeis                                                                                                        | National Institute of Health Research and Development                                                                                                                                                                                                                                                                                                                                                                                                                               | Arie Ardiansyah Nugraha; Hana Apsari Pawestri; Hartanti Dian Ikawati; Kartika Dewi Puspa; Krisna Pangesti; Nelly Puspandari; Subangkit; Triyani Soekarso; Vivi Setiawaty                                                                                                                                                                                                                                                                                                                                                                                          |                  |
| EPI_ISL_2233106                                                                                                                                                                                                                                                                                                                                                                                                                                                                                                                                                                                                                                                                                                                                                                                                                                                                                                                                                                                                                                                                                                                                                                                                                                                                                                                                                                                                                                                                                                                                                                                                                                                                                                                  | RSUD Arifin Ahmad Riau                                                                                                  | National Institute of Health Research and Development                                                                                                                                                                                                                                                                                                                                                                                                                               | Arie Ardiansyah Nugraha; Fajri Marinda; Hana Apsari Pawestri; Hartanti Dian Ikawati; Kartika Dewi Puspa; Krisna Pangesti; Nelly Puspandari; Subangkit; Triyani Soekarso; Vivi Setiawaty                                                                                                                                                                                                                                                                                                                                                                           |                  |
| EPI_ISL_2106979                                                                                                                                                                                                                                                                                                                                                                                                                                                                                                                                                                                                                                                                                                                                                                                                                                                                                                                                                                                                                                                                                                                                                                                                                                                                                                                                                                                                                                                                                                                                                                                                                                                                                                                  | RSUD Bali Mandara                                                                                                       | National Institute of Health Research and Development                                                                                                                                                                                                                                                                                                                                                                                                                               | Arie Ardiansyah Nugraha; Hana Apsari Pawestri; Hartanti Dian Ikawati; I Wayan Agus Gede Manik Saputra; Kartika Dewi Puspa; Krisna Pangesti; Nelly Puspandari; Subangkit; Triyani Soekarso; Vivi Setiawaty                                                                                                                                                                                                                                                                                                                                                         |                  |
| EPI_ISL_2262294                                                                                                                                                                                                                                                                                                                                                                                                                                                                                                                                                                                                                                                                                                                                                                                                                                                                                                                                                                                                                                                                                                                                                                                                                                                                                                                                                                                                                                                                                                                                                                                                                                                                                                                  | RSUD Brebes                                                                                                             | National Institute of Health Research and Development                                                                                                                                                                                                                                                                                                                                                                                                                               | Arie Ardiansyah Nugraha; Hana Apsari Pawestri; Hartanti Dian Ikawati; Kartika Dewi Puspa; Krisna Pangesti; Nelly Puspandari; Subangkit; Triyani Soekarso; Vivi Setiawaty                                                                                                                                                                                                                                                                                                                                                                                          |                  |
| EPI_ISL_2226647                                                                                                                                                                                                                                                                                                                                                                                                                                                                                                                                                                                                                                                                                                                                                                                                                                                                                                                                                                                                                                                                                                                                                                                                                                                                                                                                                                                                                                                                                                                                                                                                                                                                                                                  | RSUD Dr. Soetomo                                                                                                        | Institute of Tropical Disease, Universitas Airlangga                                                                                                                                                                                                                                                                                                                                                                                                                                | Acub Zaenal; Aldise M Nastri; Gatot Soegiarto; Jezzy R Dewantari; Joni Wahyuhadi; Kazufumi Shimizu; Krisnoadi Rahardjo; Laksmi Wulandari; Maria I Lusida; Neneng D Kurniati; Resti Yudhawati; Rima R Prasetya; Soetjipto; Yasuko Mori                                                                                                                                                                                                                                                                                                                             |                  |
| EPI_ISL_2617536                                                                                                                                                                                                                                                                                                                                                                                                                                                                                                                                                                                                                                                                                                                                                                                                                                                                                                                                                                                                                                                                                                                                                                                                                                                                                                                                                                                                                                                                                                                                                                                                                                                                                                                  | RSUD Kebayoran Baru                                                                                                     | National Institute of Health Research and Development                                                                                                                                                                                                                                                                                                                                                                                                                               | Arie Ardiansyah Nugraha; Hana Apsari Pawestri; Hartanti Dian Ikawati; Kartika Dewi Puspa; Krisna Pangesti; Nelly Puspandari; Subangkit; Triyani Soekarso; Vivi Setiawaty                                                                                                                                                                                                                                                                                                                                                                                          |                  |
| EPI_ISL_2101276                                                                                                                                                                                                                                                                                                                                                                                                                                                                                                                                                                                                                                                                                                                                                                                                                                                                                                                                                                                                                                                                                                                                                                                                                                                                                                                                                                                                                                                                                                                                                                                                                                                                                                                  | RSUD Mangusada                                                                                                          | Eijkman Institute for Molecular Biology, National Agency for Research and Innovation; Molecular Biology Laboratory, Faculty Medicine and Health Sciences, Warmadewa University                                                                                                                                                                                                                                                                                                      | Amin Soebandrio; Edison Johar; Eryl Sintya; Frilasita A Yudhaputri; Hidayat Trimarsanto; Ida Ayu Wayan Mahayani; Iskandar Adnan; Khin Saw Myint; Lidwina Priliani; Lydia V. Panggalo; Muhammad Rezki Rasyak; Safarina G Malik; Sri Masenyi; Sukma Oktavianthi; Willy Agustine                                                                                                                                                                                                                                                                                     |                  |
| EPI_ISL_2502764                                                                                                                                                                                                                                                                                                                                                                                                                                                                                                                                                                                                                                                                                                                                                                                                                                                                                                                                                                                                                                                                                                                                                                                                                                                                                                                                                                                                                                                                                                                                                                                                                                                                                                                  | RSUD dr. LOEKMONO HADI                                                                                                  | Genetics Working Group (Pokja Genetik) Faculty of Medicine, Public Health and Nursing Universitas Gadjah Mada (FK-KMK UGM); Disease Investigation Center Wates Ministry of Agriculture Indonesia; Department of Microbiology FK-KMK UGM; Laboratorium Diagnostik Yayasan Tahija World Mosquito Program (WMP) Yogyakarta Center for Tropical Medicine FK-KMK UGM; Integrated Research Center FK-KMK UGM; Department of Computer Science and Electronics FMIPA UGM; RSUP dr. Sardjito | Afiahayati; Dwi AA Nugrahaningsih; Dwi Indaryati; Edwin W. Daniwijaya; Eggi Arguni; Endah Supriyati; Gunadi; Hana F Hanifin; Hendra Wibawa; Indarto Sulistiyono; Irene Tania; Kristy Iskandar; Ludhang P. Rizki; Marcellus; Mohamad S. Hakim; Nungki Anggorowati; Pramesti G Dewi; Siswanto; Titik Nuryastuti; Tri Wibawa                                                                                                                                                                                                                                         |                  |
| EPI_ISL_2661382, EPI_ISL_2661383, EPI_ISL_2661412, EPI_ISL_2661414, EPI_ISL_2661418, EPI_ISL_2661420                                                                                                                                                                                                                                                                                                                                                                                                                                                                                                                                                                                                                                                                                                                                                                                                                                                                                                                                                                                                                                                                                                                                                                                                                                                                                                                                                                                                                                                                                                                                                                                                                             | RUHS College of Medical Sciences                                                                                        | CSIR-Centre for Cellular and Molecular Biology - INSACOG                                                                                                                                                                                                                                                                                                                                                                                                                            | Amreshwar Vodapalli; Ara Sreenivas; Archana Bharadwaj Siva; B Himasri; Divya Tej Sowpati; Dr. Gaurav Dalela; Dr. Jitendra Panda; Dr. Nilofer Khayyam; Dr. Raja Babu Panwar; Dr. Rajeev Gupta; Dr. Ramesh Sharma; Dr. Sonali Sharma; Dr. Sudhanshu Kacker; Dr. Vaseem Naheed Baig; Jandhyala Sai Krishna; Karthik Bharadwaj Tallapakka; Lamuk Zaveri; Onkar Kulkarni; Payel Mukherjee; Priya Nurkuthy; Rakesh K Mishra; Shreekanth Verma; Sofia Banu; Sumedha Advadhanula; Tulasi Nagabandi; Valli Nagalakshmi Undamatia; Vidhyadhari Methuku                      |                  |
| EPI_ISL_637112, EPI_ISL_637113                                                                                                                                                                                                                                                                                                                                                                                                                                                                                                                                                                                                                                                                                                                                                                                                                                                                                                                                                                                                                                                                                                                                                                                                                                                                                                                                                                                                                                                                                                                                                                                                                                                                                                   | Rafik Hariri University Hospital                                                                                        | Microbial Pathogenomics Lab                                                                                                                                                                                                                                                                                                                                                                                                                                                         | Georgi Merhi; Rita Feghali; Sima Tokajian; Tamara Salloum                                                                                                                                                                                                                                                                                                                                                                                                                                                                                                         |                  |
| EPI_ISL_450509                                                                                                                                                                                                                                                                                                                                                                                                                                                                                                                                                                                                                                                                                                                                                                                                                                                                                                                                                                                                                                                                                                                                                                                                                                                                                                                                                                                                                                                                                                                                                                                                                                                                                                                   | Rafik Hariri University Hospital                                                                                        | Rafik Hariri University Hospital                                                                                                                                                                                                                                                                                                                                                                                                                                                    | Rita Feghali                                                                                                                                                                                                                                                                                                                                                                                                                                                                                                                                                      |                  |
| EPI_ISL_2342004, EPI_ISL_2342013, EPI_ISL_2342054, EPI_ISL_2342064, EPI_ISL_2342066, EPI_ISL_2342067, EPI_ISL_2342298, EPI_ISL_2342611, EPI_ISL_2342664, EPI_ISL_2342682, EPI_ISL_2342706                                                                                                                                                                                                                                                                                                                                                                                                                                                                                                                                                                                                                                                                                                                                                                                                                                                                                                                                                                                                                                                                                                                                                                                                                                                                                                                                                                                                                                                                                                                                        |                                                                                                                         |                                                                                                                                                                                                                                                                                                                                                                                                                                                                                     |                                                                                                                                                                                                                                                                                                                                                                                                                                                                                                                                                                   |                  |
| see above                                                                                                                                                                                                                                                                                                                                                                                                                                                                                                                                                                                                                                                                                                                                                                                                                                                                                                                                                                                                                                                                                                                                                                                                                                                                                                                                                                                                                                                                                                                                                                                                                                                                                                                        | Rajendra Institute of Medical Sciences, Ranchi                                                                          | Institute of Life Sciences - INSACOG                                                                                                                                                                                                                                                                                                                                                                                                                                                | Ajay Parida; Amol M. Kanampalliwar; Arup Ghosh; Atimukta Jha; INSACOG Consortium; Omprakash Shiriwas; Punit Prasad; Rajeeb Swain; Rupesh Dash; Safal Walia; Sana Fatma; Shifu Aggarwal; Sunil K. Raghav                                                                                                                                                                                                                                                                                                                                                           |                  |
| EPI_ISL_1544317, EPI_ISL_1544487, EPI_ISL_1564356, EPI_ISL_1631164, EPI_ISL_1631170, EPI_ISL_1631314, EPI_ISL_1631836, EPI_ISL_1652717, EPI_ISL_1652897, EPI_ISL_1697989, EPI_ISL_1700313, EPI_ISL_1700494, EPI_ISL_1718700, EPI_ISL_1740551, EPI_ISL_1740611, EPI_ISL_1740633, EPI_ISL_1740691, EPI_ISL_1740754, EPI_ISL_1740766, EPI_ISL_1741325, EPI_ISL_1758982, EPI_ISL_1790217, EPI_ISL_1790323, EPI_ISL_1790372, EPI_ISL_1790378, EPI_ISL_1790415, EPI_ISL_1829814, EPI_ISL_1829841, EPI_ISL_1829894, EPI_ISL_1829951, EPI_ISL_1829958, EPI_ISL_1830001, EPI_ISL_1830033, EPI_ISL_1830108, EPI_ISL_1830209, EPI_ISL_1830245, EPI_ISL_1857631, EPI_ISL_1857673, EPI_ISL_1857699, EPI_ISL_1857728, EPI_ISL_1857758, EPI_ISL_1857770, EPI_ISL_1857779, EPI_ISL_1921463, EPI_ISL_1921523, EPI_ISL_1921538, EPI_ISL_1921568, EPI_ISL_1921596, EPI_ISL_1921631, EPI_ISL_1921691, EPI_ISL_1921713, EPI_ISL_1921731, EPI_ISL_1986670, EPI_ISL_1986688, EPI_ISL_1986695, EPI_ISL_1986956, EPI_ISL_1986979, EPI_ISL_1987022, EPI_ISL_1987044, EPI_ISL_1987170, EPI_ISL_1987178, EPI_ISL_1987183, EPI_ISL_1987210, EPI_ISL_1987256, EPI_ISL_1987329, EPI_ISL_1987335, EPI_ISL_1987336, EPI_ISL_2004448, EPI_ISL_2005162, EPI_ISL_2005192, EPI_ISL_2005617, EPI_ISL_2005649, EPI_ISL_2005664, EPI_ISL_2005671, EPI_ISL_2005705, EPI_ISL_2005715, EPI_ISL_2005716, EPI_ISL_2005784, EPI_ISL_2005792, EPI_ISL_2005804, EPI_ISL_2005808, EPI_ISL_2005837, EPI_ISL_2005838, EPI_ISL_2005839, EPI_ISL_2005845, EPI_ISL_2005858, EPI_ISL_2005866, EPI_ISL_2005868, EPI_ISL_2005886, EPI_ISL_2005898, EPI_ISL_2005905, EPI_ISL_2005906, EPI_ISL_2005947, EPI_ISL_2005993, EPI_ISL_2006007, EPI_ISL_2006010, EPI_ISL_2006012, EPI_ISL_2006062 | Wellcome Sanger Institute for the COVID-19 Genomics UK (COG-UK) Consortium                                              | Cordelia Langford; David K. Jackson; Dominic Kwiatkowski; Ewan Harrison; Ian Johnston; Jeffrey Barrett; John Sillitoe on behalf of the Wellcome Sanger Institute COVID-19 Surveillance Team; Randox Laboratories and Alex Alderton; Roberto Amato; Sonia Goncalves                                                                                                                                                                                                                  |                                                                                                                                                                                                                                                                                                                                                                                                                                                                                                                                                                   |                  |
| EPI_ISL_2157350, EPI_ISL_2157551, EPI_ISL_2157552                                                                                                                                                                                                                                                                                                                                                                                                                                                                                                                                                                                                                                                                                                                                                                                                                                                                                                                                                                                                                                                                                                                                                                                                                                                                                                                                                                                                                                                                                                                                                                                                                                                                                | Red - Regional de Vigilancia Genómica del COVID-19                                                                      | Laboratory of Respiratory Viruses and Measles, Oswaldo Cruz Institute, FIOCRUZ                                                                                                                                                                                                                                                                                                                                                                                                      | Alice Sampaio Rocha; Ana Carolina Mendonca; Anna Carolina Paixao; Claudia Diaz; Ellisa Cavalcante Pereira; Fernando Motta; Luciana Apolinario; Marilda Siqueira on behalf of the FioCruz COVID-19 Genomic Surveillance Network; Mitzi Castro; Paola Resende; Renata Serrano Lopes; Sandra Paola Paz; Taina Venas                                                                                                                                                                                                                                                  |                  |
| EPI_ISL_21415409                                                                                                                                                                                                                                                                                                                                                                                                                                                                                                                                                                                                                                                                                                                                                                                                                                                                                                                                                                                                                                                                                                                                                                                                                                                                                                                                                                                                                                                                                                                                                                                                                                                                                                                 | Reference Laboratory of the Ministry of Health                                                                          | Laboratory of Respiratory Viruses and Measles, Oswaldo Cruz Institute, FIOCRUZ                                                                                                                                                                                                                                                                                                                                                                                                      | Alice Sampaio Rocha; Ana Carolina Mendonca; Anna Carolina Paixao; Fernando Motta; Indira Martins; Jessica Edwards; Luciana Apolinario; Marilda Siqueira on behalf of the FioCruz COVID-19 Genomic Surveillance Network; Paola Resende; Renata Serrano Lopes                                                                                                                                                                                                                                                                                                       |                  |
| EPI_ISL_2710003, EPI_ISL_2710004, EPI_ISL_2710008, EPI_ISL_2710009                                                                                                                                                                                                                                                                                                                                                                                                                                                                                                                                                                                                                                                                                                                                                                                                                                                                                                                                                                                                                                                                                                                                                                                                                                                                                                                                                                                                                                                                                                                                                                                                                                                               | Regional VRDL,Dibrugarh                                                                                                 | Regional VRDL,Dibrugarh                                                                                                                                                                                                                                                                                                                                                                                                                                                             | A Jakharia; B Borkakoty; C Bhattacharya; D Biswas; K Narain; Mandakini Das Sarma; R Hazarika                                                                                                                                                                                                                                                                                                                                                                                                                                                                      |                  |
| EPI_ISL_2741538, EPI_ISL_2741628, EPI_ISL_2741632, EPI_ISL_2741638, EPI_ISL_2741640, EPI_ISL_2741643, EPI_ISL_2741757, EPI_ISL_2742160, EPI_ISL_2742191, EPI_ISL_2742194, EPI_ISL_2742204, EPI_ISL_2742225, EPI_ISL_2742228, EPI_ISL_2742229, EPI_ISL_2742231, EPI_ISL_2742235, EPI_ISL_2742236, EPI_ISL_2742253, EPI_ISL_2742254, EPI_ISL_2742262, EPI_ISL_2742263, EPI_ISL_2742267, EPI_ISL_2742521, EPI_ISL_2743257, EPI_ISL_2743440, EPI_ISL_2743680, EPI_ISL_2743905, EPI_ISL_2745306, EPI_ISL_2745630, EPI_ISL_2746375, EPI_ISL_2746491, EPI_ISL_2746623, EPI_ISL_2746695, EPI_ISL_2746847, EPI_ISL_2747197, EPI_ISL_2747466, EPI_ISL_2748367, EPI_ISL_2748451, EPI_ISL_2748462, EPI_ISL_2748648, EPI_ISL_2748702, EPI_ISL_2749454, EPI_ISL_2749456, EPI_ISL_2749610, EPI_ISL_2749622, EPI_ISL_2749647, EPI_ISL_2749686, EPI_ISL_2749694                                                                                                                                                                                                                                                                                                                                                                                                                                                                                                                                                                                                                                                                                                                                                                                                                                                                                   | COVID-19 Genomics UK (COG-UK) Consortium                                                                                | PHE Covid Sequencing Team                                                                                                                                                                                                                                                                                                                                                                                                                                                           |                                                                                                                                                                                                                                                                                                                                                                                                                                                                                                                                                                   |                  |
| see above                                                                                                                                                                                                                                                                                                                                                                                                                                                                                                                                                                                                                                                                                                                                                                                                                                                                                                                                                                                                                                                                                                                                                                                                                                                                                                                                                                                                                                                                                                                                                                                                                                                                                                                        | Respiratory Virus Unit, Microbiology Services Colindale, Public Health England                                          |                                                                                                                                                                                                                                                                                                                                                                                                                                                                                     |                                                                                                                                                                                                                                                                                                                                                                                                                                                                                                                                                                   |                  |
| EPI_ISL_407071                                                                                                                                                                                                                                                                                                                                                                                                                                                                                                                                                                                                                                                                                                                                                                                                                                                                                                                                                                                                                                                                                                                                                                                                                                                                                                                                                                                                                                                                                                                                                                                                                                                                                                                   | Respiratory Virus Unit, Microbiology Services Colindale, Public Health England                                          | Respiratory Virus Unit, Microbiology Services Colindale, Public Health England                                                                                                                                                                                                                                                                                                                                                                                                      | Angie Lackenby; Joanna Ellis; Jonathan Hubb; Kirstin Edwards; Leena Bhaw; Maria Zambon; Monica Galiano; Omolola Akinbami; Richard Myers; Shahjahan Miah; Tiina Talts                                                                                                                                                                                                                                                                                                                                                                                              |                  |

|                                                                                                                                                                                                                                                                                                                                                                                                                                                                                                                                                                                                                                                                                                                                                                                                                                                                                                                                                                                                                                                                                                                                                                                                                                                                                                                                                                                                                                                                                                                                                                                                                                                                                                                                                                                                                                                                                                                                                                                                                                                                                                                                                                                                                                                                                                                                                                                                                                                                                                                                                                                                                                                                                                                                                                                                                                                                                                                                                                                                                                                                                                                                                                                                                                                                                                                                                                                                                                                                                                                                                                                                                                                                                                                                                                                                                                                                                                                                                                                                                                                                                                                                                                                                                                                                                                                                                                                                                                                                                                                                                                                                                                                                                                                                                                                                                                                                                                                                                                                                                                                                                                                                                                                                                                                                                                                                                                                                                                                                                                                                                                                                                                                                                                                                                                                                                                                                                                                                                                                                                                                                                                                                                                                                                                                                                                                                                                                                                                                                                                                                                                                                                                                                                                                                                                                                                                                                                                                                                                                                                                                                                                                                                                                                                                                                                                                                                                                                                                                                                                                                                                                                                                                                                                                                                                                                                                                                                                                                                                                                                                                                                                                                                                                                                                                                                                                                                                                                                                                                                                                                                                                                                                                                                                                                                                                                                                                                                                                                                                                                                                                                                                                                                                                                                                                                                                                                                                                                                                                                                                                                                                                                                                                                                                                                                                                                                                                                                                                                                                                                                                                                                                                                                                                                                                                                                                                                                                                                                                                                                                                                                                                                                                                                                                                                                                                                                                                                                                                                                                                                                                                                                                                                                                                                                                                                                                                                                                                                                                                                                                                                                                              |                                                                                                                    |                                                                                                                    |                                                                                                                                                                                                                                                                                                                                                                                                                                                                                                                                                                    |                                                                                                                                                                                                                                                                                                                                                                                                                            |
|------------------------------------------------------------------------------------------------------------------------------------------------------------------------------------------------------------------------------------------------------------------------------------------------------------------------------------------------------------------------------------------------------------------------------------------------------------------------------------------------------------------------------------------------------------------------------------------------------------------------------------------------------------------------------------------------------------------------------------------------------------------------------------------------------------------------------------------------------------------------------------------------------------------------------------------------------------------------------------------------------------------------------------------------------------------------------------------------------------------------------------------------------------------------------------------------------------------------------------------------------------------------------------------------------------------------------------------------------------------------------------------------------------------------------------------------------------------------------------------------------------------------------------------------------------------------------------------------------------------------------------------------------------------------------------------------------------------------------------------------------------------------------------------------------------------------------------------------------------------------------------------------------------------------------------------------------------------------------------------------------------------------------------------------------------------------------------------------------------------------------------------------------------------------------------------------------------------------------------------------------------------------------------------------------------------------------------------------------------------------------------------------------------------------------------------------------------------------------------------------------------------------------------------------------------------------------------------------------------------------------------------------------------------------------------------------------------------------------------------------------------------------------------------------------------------------------------------------------------------------------------------------------------------------------------------------------------------------------------------------------------------------------------------------------------------------------------------------------------------------------------------------------------------------------------------------------------------------------------------------------------------------------------------------------------------------------------------------------------------------------------------------------------------------------------------------------------------------------------------------------------------------------------------------------------------------------------------------------------------------------------------------------------------------------------------------------------------------------------------------------------------------------------------------------------------------------------------------------------------------------------------------------------------------------------------------------------------------------------------------------------------------------------------------------------------------------------------------------------------------------------------------------------------------------------------------------------------------------------------------------------------------------------------------------------------------------------------------------------------------------------------------------------------------------------------------------------------------------------------------------------------------------------------------------------------------------------------------------------------------------------------------------------------------------------------------------------------------------------------------------------------------------------------------------------------------------------------------------------------------------------------------------------------------------------------------------------------------------------------------------------------------------------------------------------------------------------------------------------------------------------------------------------------------------------------------------------------------------------------------------------------------------------------------------------------------------------------------------------------------------------------------------------------------------------------------------------------------------------------------------------------------------------------------------------------------------------------------------------------------------------------------------------------------------------------------------------------------------------------------------------------------------------------------------------------------------------------------------------------------------------------------------------------------------------------------------------------------------------------------------------------------------------------------------------------------------------------------------------------------------------------------------------------------------------------------------------------------------------------------------------------------------------------------------------------------------------------------------------------------------------------------------------------------------------------------------------------------------------------------------------------------------------------------------------------------------------------------------------------------------------------------------------------------------------------------------------------------------------------------------------------------------------------------------------------------------------------------------------------------------------------------------------------------------------------------------------------------------------------------------------------------------------------------------------------------------------------------------------------------------------------------------------------------------------------------------------------------------------------------------------------------------------------------------------------------------------------------------------------------------------------------------------------------------------------------------------------------------------------------------------------------------------------------------------------------------------------------------------------------------------------------------------------------------------------------------------------------------------------------------------------------------------------------------------------------------------------------------------------------------------------------------------------------------------------------------------------------------------------------------------------------------------------------------------------------------------------------------------------------------------------------------------------------------------------------------------------------------------------------------------------------------------------------------------------------------------------------------------------------------------------------------------------------------------------------------------------------------------------------------------------------------------------------------------------------------------------------------------------------------------------------------------------------------------------------------------------------------------------------------------------------------------------------------------------------------------------------------------------------------------------------------------------------------------------------------------------------------------------------------------------------------------------------------------------------------------------------------------------------------------------------------------------------------------------------------------------------------------------------------------------------------------------------------------------------------------------------------------------------------------------------------------------------------------------------------------------------------------------------------------------------------------------------------------------------------------------------------------------------------------------------------------------------------------------------------------------------------------------------------------------------------------------------------------------------------------------------------------------------------------------------------------------------------------------------------------------------------------------------------------------------------------------------------------------------------------------------------------------------------------------------------------------------------------------------------------------------------------------------------------------------------------------------------------------------------------------------------------------------------------------------------------------------------------------------------------------------------------------------------------------------------------------------------------------------------------------------------------------------------------------------------------------------------------------------------------------------------------------------------------------------------------------------------------------------------------------------------------------------------------------------------------------------------------------------------------------------------------------------------------------------------------------------------------------------------------------------------------------------------------------------------------------------------------------------------------------------------------------------------------------------------------------------------------------------------------------------------------------------------------------------------------------------------------------------------------------------------------------------------------------------------------------------------------------------------|--------------------------------------------------------------------------------------------------------------------|--------------------------------------------------------------------------------------------------------------------|--------------------------------------------------------------------------------------------------------------------------------------------------------------------------------------------------------------------------------------------------------------------------------------------------------------------------------------------------------------------------------------------------------------------------------------------------------------------------------------------------------------------------------------------------------------------|----------------------------------------------------------------------------------------------------------------------------------------------------------------------------------------------------------------------------------------------------------------------------------------------------------------------------------------------------------------------------------------------------------------------------|
| EPI_ISL_1590137                                                                                                                                                                                                                                                                                                                                                                                                                                                                                                                                                                                                                                                                                                                                                                                                                                                                                                                                                                                                                                                                                                                                                                                                                                                                                                                                                                                                                                                                                                                                                                                                                                                                                                                                                                                                                                                                                                                                                                                                                                                                                                                                                                                                                                                                                                                                                                                                                                                                                                                                                                                                                                                                                                                                                                                                                                                                                                                                                                                                                                                                                                                                                                                                                                                                                                                                                                                                                                                                                                                                                                                                                                                                                                                                                                                                                                                                                                                                                                                                                                                                                                                                                                                                                                                                                                                                                                                                                                                                                                                                                                                                                                                                                                                                                                                                                                                                                                                                                                                                                                                                                                                                                                                                                                                                                                                                                                                                                                                                                                                                                                                                                                                                                                                                                                                                                                                                                                                                                                                                                                                                                                                                                                                                                                                                                                                                                                                                                                                                                                                                                                                                                                                                                                                                                                                                                                                                                                                                                                                                                                                                                                                                                                                                                                                                                                                                                                                                                                                                                                                                                                                                                                                                                                                                                                                                                                                                                                                                                                                                                                                                                                                                                                                                                                                                                                                                                                                                                                                                                                                                                                                                                                                                                                                                                                                                                                                                                                                                                                                                                                                                                                                                                                                                                                                                                                                                                                                                                                                                                                                                                                                                                                                                                                                                                                                                                                                                                                                                                                                                                                                                                                                                                                                                                                                                                                                                                                                                                                                                                                                                                                                                                                                                                                                                                                                                                                                                                                                                                                                                                                                                                                                                                                                                                                                                                                                                                                                                                                                                                                                                                              | Riga East University Hospital-National Microbiology Reference Laboratory; Eurofins Genomics Europe Sequencing GmbH | Riga East University Hospital-National Microbiology Reference Laboratory; Eurofins Genomics Europe Sequencing GmbH | Arzu Aigulieva; Džiāna Dusacka; Dārta Pūpola; Ilva Pole; Reinis Vangravs; Reinis Zeltmatis; Sergejs Nikisins; Ģirts Šķenders                                                                                                                                                                                                                                                                                                                                                                                                                                       |                                                                                                                                                                                                                                                                                                                                                                                                                            |
| EPI_ISL_521861, EPI_ISL_521861, EPI_ISL_779409, EPI_ISL_779410, EPI_ISL_779413, EPI_ISL_2321157, EPI_ISL_2321158, EPI_ISL_2321160, EPI_ISL_2321162, EPI_ISL_2321164, EPI_ISL_2321165, EPI_ISL_2321166, EPI_ISL_2321168, EPI_ISL_2321169, EPI_ISL_2379269                                                                                                                                                                                                                                                                                                                                                                                                                                                                                                                                                                                                                                                                                                                                                                                                                                                                                                                                                                                                                                                                                                                                                                                                                                                                                                                                                                                                                                                                                                                                                                                                                                                                                                                                                                                                                                                                                                                                                                                                                                                                                                                                                                                                                                                                                                                                                                                                                                                                                                                                                                                                                                                                                                                                                                                                                                                                                                                                                                                                                                                                                                                                                                                                                                                                                                                                                                                                                                                                                                                                                                                                                                                                                                                                                                                                                                                                                                                                                                                                                                                                                                                                                                                                                                                                                                                                                                                                                                                                                                                                                                                                                                                                                                                                                                                                                                                                                                                                                                                                                                                                                                                                                                                                                                                                                                                                                                                                                                                                                                                                                                                                                                                                                                                                                                                                                                                                                                                                                                                                                                                                                                                                                                                                                                                                                                                                                                                                                                                                                                                                                                                                                                                                                                                                                                                                                                                                                                                                                                                                                                                                                                                                                                                                                                                                                                                                                                                                                                                                                                                                                                                                                                                                                                                                                                                                                                                                                                                                                                                                                                                                                                                                                                                                                                                                                                                                                                                                                                                                                                                                                                                                                                                                                                                                                                                                                                                                                                                                                                                                                                                                                                                                                                                                                                                                                                                                                                                                                                                                                                                                                                                                                                                                                                                                                                                                                                                                                                                                                                                                                                                                                                                                                                                                                                                                                                                                                                                                                                                                                                                                                                                                                                                                                                                                                                                                                                                                                                                                                                                                                                                                                                                                                                                                                                                                                                                     | see above                                                                                                          | Royal Darwin Hospital Pathology                                                                                    | MDU-PHL                                                                                                                                                                                                                                                                                                                                                                                                                                                                                                                                                            |                                                                                                                                                                                                                                                                                                                                                                                                                            |
| EPI_ISL_2250189, EPI_ISL_2250190, EPI_ISL_2250191, EPI_ISL_2250193, EPI_ISL_2250196, EPI_ISL_2250197, EPI_ISL_2250198, EPI_ISL_2250199, EPI_ISL_2250200, EPI_ISL_2250202, EPI_ISL_2250204, EPI_ISL_2250206, EPI_ISL_2250207, EPI_ISL_2250208, EPI_ISL_2250209, EPI_ISL_2250210, EPI_ISL_2250211, EPI_ISL_2250216, EPI_ISL_2250217, EPI_ISL_2250218, EPI_ISL_2250219, EPI_ISL_2250220                                                                                                                                                                                                                                                                                                                                                                                                                                                                                                                                                                                                                                                                                                                                                                                                                                                                                                                                                                                                                                                                                                                                                                                                                                                                                                                                                                                                                                                                                                                                                                                                                                                                                                                                                                                                                                                                                                                                                                                                                                                                                                                                                                                                                                                                                                                                                                                                                                                                                                                                                                                                                                                                                                                                                                                                                                                                                                                                                                                                                                                                                                                                                                                                                                                                                                                                                                                                                                                                                                                                                                                                                                                                                                                                                                                                                                                                                                                                                                                                                                                                                                                                                                                                                                                                                                                                                                                                                                                                                                                                                                                                                                                                                                                                                                                                                                                                                                                                                                                                                                                                                                                                                                                                                                                                                                                                                                                                                                                                                                                                                                                                                                                                                                                                                                                                                                                                                                                                                                                                                                                                                                                                                                                                                                                                                                                                                                                                                                                                                                                                                                                                                                                                                                                                                                                                                                                                                                                                                                                                                                                                                                                                                                                                                                                                                                                                                                                                                                                                                                                                                                                                                                                                                                                                                                                                                                                                                                                                                                                                                                                                                                                                                                                                                                                                                                                                                                                                                                                                                                                                                                                                                                                                                                                                                                                                                                                                                                                                                                                                                                                                                                                                                                                                                                                                                                                                                                                                                                                                                                                                                                                                                                                                                                                                                                                                                                                                                                                                                                                                                                                                                                                                                                                                                                                                                                                                                                                                                                                                                                                                                                                                                                                                                                                                                                                                                                                                                                                                                                                                                                                                                                                                                                                         | see above                                                                                                          | Royal Darwin Hospital Pathology                                                                                    | Microbiological Diagnostic Unit Public Health Laboratory (MDU-PHL)                                                                                                                                                                                                                                                                                                                                                                                                                                                                                                 |                                                                                                                                                                                                                                                                                                                                                                                                                            |
| EPI_ISL_5277607                                                                                                                                                                                                                                                                                                                                                                                                                                                                                                                                                                                                                                                                                                                                                                                                                                                                                                                                                                                                                                                                                                                                                                                                                                                                                                                                                                                                                                                                                                                                                                                                                                                                                                                                                                                                                                                                                                                                                                                                                                                                                                                                                                                                                                                                                                                                                                                                                                                                                                                                                                                                                                                                                                                                                                                                                                                                                                                                                                                                                                                                                                                                                                                                                                                                                                                                                                                                                                                                                                                                                                                                                                                                                                                                                                                                                                                                                                                                                                                                                                                                                                                                                                                                                                                                                                                                                                                                                                                                                                                                                                                                                                                                                                                                                                                                                                                                                                                                                                                                                                                                                                                                                                                                                                                                                                                                                                                                                                                                                                                                                                                                                                                                                                                                                                                                                                                                                                                                                                                                                                                                                                                                                                                                                                                                                                                                                                                                                                                                                                                                                                                                                                                                                                                                                                                                                                                                                                                                                                                                                                                                                                                                                                                                                                                                                                                                                                                                                                                                                                                                                                                                                                                                                                                                                                                                                                                                                                                                                                                                                                                                                                                                                                                                                                                                                                                                                                                                                                                                                                                                                                                                                                                                                                                                                                                                                                                                                                                                                                                                                                                                                                                                                                                                                                                                                                                                                                                                                                                                                                                                                                                                                                                                                                                                                                                                                                                                                                                                                                                                                                                                                                                                                                                                                                                                                                                                                                                                                                                                                                                                                                                                                                                                                                                                                                                                                                                                                                                                                                                                                                                                                                                                                                                                                                                                                                                                                                                                                                                                                                                                                              | Royal Hobart Hospital                                                                                              | Royal Hobart Hospital                                                                                              | Caly L.; Druce J.; M.L.; Meumann, E.; N.L.; Sait; Seemann T.; Sherry                                                                                                                                                                                                                                                                                                                                                                                                                                                                                               |                                                                                                                                                                                                                                                                                                                                                                                                                            |
| EPI_ISL_522621, EPI_ISL_522686, EPI_ISL_522688, EPI_ISL_522711                                                                                                                                                                                                                                                                                                                                                                                                                                                                                                                                                                                                                                                                                                                                                                                                                                                                                                                                                                                                                                                                                                                                                                                                                                                                                                                                                                                                                                                                                                                                                                                                                                                                                                                                                                                                                                                                                                                                                                                                                                                                                                                                                                                                                                                                                                                                                                                                                                                                                                                                                                                                                                                                                                                                                                                                                                                                                                                                                                                                                                                                                                                                                                                                                                                                                                                                                                                                                                                                                                                                                                                                                                                                                                                                                                                                                                                                                                                                                                                                                                                                                                                                                                                                                                                                                                                                                                                                                                                                                                                                                                                                                                                                                                                                                                                                                                                                                                                                                                                                                                                                                                                                                                                                                                                                                                                                                                                                                                                                                                                                                                                                                                                                                                                                                                                                                                                                                                                                                                                                                                                                                                                                                                                                                                                                                                                                                                                                                                                                                                                                                                                                                                                                                                                                                                                                                                                                                                                                                                                                                                                                                                                                                                                                                                                                                                                                                                                                                                                                                                                                                                                                                                                                                                                                                                                                                                                                                                                                                                                                                                                                                                                                                                                                                                                                                                                                                                                                                                                                                                                                                                                                                                                                                                                                                                                                                                                                                                                                                                                                                                                                                                                                                                                                                                                                                                                                                                                                                                                                                                                                                                                                                                                                                                                                                                                                                                                                                                                                                                                                                                                                                                                                                                                                                                                                                                                                                                                                                                                                                                                                                                                                                                                                                                                                                                                                                                                                                                                                                                                                                                                                                                                                                                                                                                                                                                                                                                                                                                                                                                               | Royal Hobart Hospital Microbiology Department                                                                      | MDU-PHL                                                                                                            | Cooley L.; van Haeften R.                                                                                                                                                                                                                                                                                                                                                                                                                                                                                                                                          |                                                                                                                                                                                                                                                                                                                                                                                                                            |
| EPI_ISL_1969246, EPI_ISL_1969247, EPI_ISL_1969248                                                                                                                                                                                                                                                                                                                                                                                                                                                                                                                                                                                                                                                                                                                                                                                                                                                                                                                                                                                                                                                                                                                                                                                                                                                                                                                                                                                                                                                                                                                                                                                                                                                                                                                                                                                                                                                                                                                                                                                                                                                                                                                                                                                                                                                                                                                                                                                                                                                                                                                                                                                                                                                                                                                                                                                                                                                                                                                                                                                                                                                                                                                                                                                                                                                                                                                                                                                                                                                                                                                                                                                                                                                                                                                                                                                                                                                                                                                                                                                                                                                                                                                                                                                                                                                                                                                                                                                                                                                                                                                                                                                                                                                                                                                                                                                                                                                                                                                                                                                                                                                                                                                                                                                                                                                                                                                                                                                                                                                                                                                                                                                                                                                                                                                                                                                                                                                                                                                                                                                                                                                                                                                                                                                                                                                                                                                                                                                                                                                                                                                                                                                                                                                                                                                                                                                                                                                                                                                                                                                                                                                                                                                                                                                                                                                                                                                                                                                                                                                                                                                                                                                                                                                                                                                                                                                                                                                                                                                                                                                                                                                                                                                                                                                                                                                                                                                                                                                                                                                                                                                                                                                                                                                                                                                                                                                                                                                                                                                                                                                                                                                                                                                                                                                                                                                                                                                                                                                                                                                                                                                                                                                                                                                                                                                                                                                                                                                                                                                                                                                                                                                                                                                                                                                                                                                                                                                                                                                                                                                                                                                                                                                                                                                                                                                                                                                                                                                                                                                                                                                                                                                                                                                                                                                                                                                                                                                                                                                                                                                                                                                            | Rumah Sakit Umum Daerah Palangkaraya                                                                               | National Institute of Health Research and Development                                                              | Arie Ardiansyah Nugraha; Hana Apsari Pawestri; Hartanti Dian Ikawati; Kartika Dewi Puspa; Krisna Pangesti; Nelly Puspandari; Subangkit; Triyani Soekarso; Vivi Setiawaty                                                                                                                                                                                                                                                                                                                                                                                           |                                                                                                                                                                                                                                                                                                                                                                                                                            |
| EPI_ISL_2341681, EPI_ISL_2341685, EPI_ISL_2341697, EPI_ISL_2341714, EPI_ISL_2341717, EPI_ISL_2341728, EPI_ISL_2341774, EPI_ISL_2341795, EPI_ISL_2341852, EPI_ISL_2341853, EPI_ISL_2341855, EPI_ISL_2341856, EPI_ISL_2341859, EPI_ISL_2341938                                                                                                                                                                                                                                                                                                                                                                                                                                                                                                                                                                                                                                                                                                                                                                                                                                                                                                                                                                                                                                                                                                                                                                                                                                                                                                                                                                                                                                                                                                                                                                                                                                                                                                                                                                                                                                                                                                                                                                                                                                                                                                                                                                                                                                                                                                                                                                                                                                                                                                                                                                                                                                                                                                                                                                                                                                                                                                                                                                                                                                                                                                                                                                                                                                                                                                                                                                                                                                                                                                                                                                                                                                                                                                                                                                                                                                                                                                                                                                                                                                                                                                                                                                                                                                                                                                                                                                                                                                                                                                                                                                                                                                                                                                                                                                                                                                                                                                                                                                                                                                                                                                                                                                                                                                                                                                                                                                                                                                                                                                                                                                                                                                                                                                                                                                                                                                                                                                                                                                                                                                                                                                                                                                                                                                                                                                                                                                                                                                                                                                                                                                                                                                                                                                                                                                                                                                                                                                                                                                                                                                                                                                                                                                                                                                                                                                                                                                                                                                                                                                                                                                                                                                                                                                                                                                                                                                                                                                                                                                                                                                                                                                                                                                                                                                                                                                                                                                                                                                                                                                                                                                                                                                                                                                                                                                                                                                                                                                                                                                                                                                                                                                                                                                                                                                                                                                                                                                                                                                                                                                                                                                                                                                                                                                                                                                                                                                                                                                                                                                                                                                                                                                                                                                                                                                                                                                                                                                                                                                                                                                                                                                                                                                                                                                                                                                                                                                                                                                                                                                                                                                                                                                                                                                                                                                                                                                                                 | see above                                                                                                          | S.C.B. Medical College and Hospital, Cuttack                                                                       | Institute of Life Sciences - INSACOG                                                                                                                                                                                                                                                                                                                                                                                                                                                                                                                               |                                                                                                                                                                                                                                                                                                                                                                                                                            |
| EPI_ISL_467989, EPI_ISL_468032, EPI_ISL_468037, EPI_ISL_508605, EPI_ISL_510544, EPI_ISL_513913, EPI_ISL_603125, EPI_ISL_622764, EPI_ISL_654799, EPI_ISL_732960, EPI_ISL_812357, EPI_ISL_812358, EPI_ISL_1029956, EPI_ISL_1701832, EPI_ISL_1704673, EPI_ISL_1704675, EPI_ISL_1704676, EPI_ISL_1704677, EPI_ISL_1704678, EPI_ISL_1704786, EPI_ISL_1704787, EPI_ISL_1704788, EPI_ISL_1704789, EPI_ISL_1704790, EPI_ISL_1704791, EPI_ISL_1704792, EPI_ISL_1704793, EPI_ISL_1704794, EPI_ISL_1704798, EPI_ISL_1704799, EPI_ISL_1704802, EPI_ISL_1704803, EPI_ISL_1704808, EPI_ISL_1706835, EPI_ISL_1706837, EPI_ISL_2462337, EPI_ISL_2462338, EPI_ISL_2462342, EPI_ISL_2462343, EPI_ISL_2462344, EPI_ISL_2462345, EPI_ISL_2462346, EPI_ISL_2462348, EPI_ISL_2462349, EPI_ISL_2462352, EPI_ISL_2462353, EPI_ISL_2462356, EPI_ISL_2462357, EPI_ISL_2462358, EPI_ISL_2462359, EPI_ISL_2462361, EPI_ISL_2462362, EPI_ISL_2462363, EPI_ISL_2462364, EPI_ISL_2462365, EPI_ISL_2462366, EPI_ISL_2462367, EPI_ISL_2462368                                                                                                                                                                                                                                                                                                                                                                                                                                                                                                                                                                                                                                                                                                                                                                                                                                                                                                                                                                                                                                                                                                                                                                                                                                                                                                                                                                                                                                                                                                                                                                                                                                                                                                                                                                                                                                                                                                                                                                                                                                                                                                                                                                                                                                                                                                                                                                                                                                                                                                                                                                                                                                                                                                                                                                                                                                                                                                                                                                                                                                                                                                                                                                                                                                                                                                                                                                                                                                                                                                                                                                                                                                                                                                                                                                                                                                                                                                                                                                                                                                                                                                                                                                                                                                                                                                                                                                                                                                                                                                                                                                                                                                                                                                                                                                                                                                                                                                                                                                                                                                                                                                                                                                                                                                                                                                                                                                                                                                                                                                                                                                                                                                                                                                                                                                                                                                                                                                                                                                                                                                                                                                                                                                                                                                                                                                                                                                                                                                                                                                                                                                                                                                                                                                                                                                                                                                                                                                                                                                                                                                                                                                                                                                                                                                                                                                                                                                                                                                                                                                                                                                                                                                                                                                                                                                                                                                                                                                                                                                                                                                                                                                                                                                                                                                                                                                                                                                                                                                                                                                                                                                                                                                                                                                                                                                                                                                                                                                                                                                                                                                                                                                                                                                                                                                                                                                                                                                                                                                                                                                                                                                                                                                                                                                                                                                                                                                                                                                                                                                                                                                                                                                                                                                                                                                                                                                                                                                                                                                                                                                                                                                 | see above                                                                                                          | SA Pathology                                                                                                       | SA Pathology                                                                                                                                                                                                                                                                                                                                                                                                                                                                                                                                                       | Caitlin Selway; Chuan Kok Lim; Geoff Higgins; Ivan Bastian; Julien Soubrier; Karin Kassahn; Lex Leong; Mark Turra; Song Gao                                                                                                                                                                                                                                                                                                |
| EPI_ISL_455603                                                                                                                                                                                                                                                                                                                                                                                                                                                                                                                                                                                                                                                                                                                                                                                                                                                                                                                                                                                                                                                                                                                                                                                                                                                                                                                                                                                                                                                                                                                                                                                                                                                                                                                                                                                                                                                                                                                                                                                                                                                                                                                                                                                                                                                                                                                                                                                                                                                                                                                                                                                                                                                                                                                                                                                                                                                                                                                                                                                                                                                                                                                                                                                                                                                                                                                                                                                                                                                                                                                                                                                                                                                                                                                                                                                                                                                                                                                                                                                                                                                                                                                                                                                                                                                                                                                                                                                                                                                                                                                                                                                                                                                                                                                                                                                                                                                                                                                                                                                                                                                                                                                                                                                                                                                                                                                                                                                                                                                                                                                                                                                                                                                                                                                                                                                                                                                                                                                                                                                                                                                                                                                                                                                                                                                                                                                                                                                                                                                                                                                                                                                                                                                                                                                                                                                                                                                                                                                                                                                                                                                                                                                                                                                                                                                                                                                                                                                                                                                                                                                                                                                                                                                                                                                                                                                                                                                                                                                                                                                                                                                                                                                                                                                                                                                                                                                                                                                                                                                                                                                                                                                                                                                                                                                                                                                                                                                                                                                                                                                                                                                                                                                                                                                                                                                                                                                                                                                                                                                                                                                                                                                                                                                                                                                                                                                                                                                                                                                                                                                                                                                                                                                                                                                                                                                                                                                                                                                                                                                                                                                                                                                                                                                                                                                                                                                                                                                                                                                                                                                                                                                                                                                                                                                                                                                                                                                                                                                                                                                                                                                                                               | SA Pathology                                                                                                       | VPRL                                                                                                               | Beard, MR.; C.K.; Coldbeck-Shackley, R.; Kirby, E.; L.E.X.; Leong; Lim; Llamas, B.; Merrett, J.; Shue, B.; Van Der Hoek, K.                                                                                                                                                                                                                                                                                                                                                                                                                                        |                                                                                                                                                                                                                                                                                                                                                                                                                            |
| EPI_ISL_2450337                                                                                                                                                                                                                                                                                                                                                                                                                                                                                                                                                                                                                                                                                                                                                                                                                                                                                                                                                                                                                                                                                                                                                                                                                                                                                                                                                                                                                                                                                                                                                                                                                                                                                                                                                                                                                                                                                                                                                                                                                                                                                                                                                                                                                                                                                                                                                                                                                                                                                                                                                                                                                                                                                                                                                                                                                                                                                                                                                                                                                                                                                                                                                                                                                                                                                                                                                                                                                                                                                                                                                                                                                                                                                                                                                                                                                                                                                                                                                                                                                                                                                                                                                                                                                                                                                                                                                                                                                                                                                                                                                                                                                                                                                                                                                                                                                                                                                                                                                                                                                                                                                                                                                                                                                                                                                                                                                                                                                                                                                                                                                                                                                                                                                                                                                                                                                                                                                                                                                                                                                                                                                                                                                                                                                                                                                                                                                                                                                                                                                                                                                                                                                                                                                                                                                                                                                                                                                                                                                                                                                                                                                                                                                                                                                                                                                                                                                                                                                                                                                                                                                                                                                                                                                                                                                                                                                                                                                                                                                                                                                                                                                                                                                                                                                                                                                                                                                                                                                                                                                                                                                                                                                                                                                                                                                                                                                                                                                                                                                                                                                                                                                                                                                                                                                                                                                                                                                                                                                                                                                                                                                                                                                                                                                                                                                                                                                                                                                                                                                                                                                                                                                                                                                                                                                                                                                                                                                                                                                                                                                                                                                                                                                                                                                                                                                                                                                                                                                                                                                                                                                                                                                                                                                                                                                                                                                                                                                                                                                                                                                                                                                              | SANJAY GANDHI INSTITUTE OF TRAUMA AND ORTHOPAEDICS                                                                 | INSACOG-KA, NIMHANS                                                                                                | Ananthapadmanabha Kotambail; Anita S Desai; Anson Kunjumon George; Chetan G K; Chitra Pattabiraman; Darshan Sreenivas; Gautham Arunachal Udupi; V Ravi                                                                                                                                                                                                                                                                                                                                                                                                             |                                                                                                                                                                                                                                                                                                                                                                                                                            |
| EPI_ISL_1927305, EPI_ISL_1927400, EPI_ISL_1927401, EPI_ISL_1927403, EPI_ISL_1927404, EPI_ISL_1927405, EPI_ISL_1927407, EPI_ISL_1927408, EPI_ISL_1927410, EPI_ISL_1927411, EPI_ISL_1927413, EPI_ISL_1927414, EPI_ISL_1927416, EPI_ISL_1927417, EPI_ISL_1927419, EPI_ISL_1927420, EPI_ISL_1927422, EPI_ISL_1927423, EPI_ISL_1927424, EPI_ISL_1927426, EPI_ISL_2131667, EPI_ISL_2131671, EPI_ISL_2131676, EPI_ISL_2131691, EPI_ISL_2131692, EPI_ISL_2131693, EPI_ISL_2131694, EPI_ISL_2131695, EPI_ISL_2131696, EPI_ISL_2131697, EPI_ISL_2131698, EPI_ISL_2131699, EPI_ISL_2131701, EPI_ISL_2131702, EPI_ISL_2131703, EPI_ISL_2131704, EPI_ISL_2131705, EPI_ISL_2131706, EPI_ISL_2131707, EPI_ISL_2131708, EPI_ISL_2131709, EPI_ISL_2131710, EPI_ISL_2131712, EPI_ISL_2131717, EPI_ISL_2131718, EPI_ISL_2131719, EPI_ISL_2131720, EPI_ISL_2131721, EPI_ISL_2131722, EPI_ISL_2131723, EPI_ISL_2131724, EPI_ISL_2131725, EPI_ISL_2131726, EPI_ISL_2131727, EPI_ISL_2131728, EPI_ISL_2131729, EPI_ISL_2131730, EPI_ISL_2131731, EPI_ISL_2131732, EPI_ISL_2131733, EPI_ISL_2131734, EPI_ISL_2131735, EPI_ISL_2131736, EPI_ISL_2131737, EPI_ISL_2131738, EPI_ISL_2131739, EPI_ISL_2131740, EPI_ISL_2131741, EPI_ISL_2131742, EPI_ISL_2131743, EPI_ISL_2131744, EPI_ISL_2131745, EPI_ISL_2131746, EPI_ISL_2131747, EPI_ISL_2131748, EPI_ISL_2131749, EPI_ISL_2131750, EPI_ISL_2131751, EPI_ISL_2131752, EPI_ISL_2131753, EPI_ISL_2131754, EPI_ISL_2131755, EPI_ISL_2131756, EPI_ISL_2131757, EPI_ISL_2131758, EPI_ISL_2131759, EPI_ISL_2131760, EPI_ISL_2131761, EPI_ISL_2131762, EPI_ISL_2131763, EPI_ISL_2131764, EPI_ISL_2131765, EPI_ISL_2131766, EPI_ISL_2131767, EPI_ISL_2131768, EPI_ISL_2131769, EPI_ISL_2131770, EPI_ISL_2131771, EPI_ISL_2131772, EPI_ISL_2131773, EPI_ISL_2131774, EPI_ISL_2131775, EPI_ISL_2131776, EPI_ISL_2131777, EPI_ISL_2131778, EPI_ISL_2131779, EPI_ISL_2131780, EPI_ISL_2131781, EPI_ISL_2131782, EPI_ISL_2131783, EPI_ISL_2131784, EPI_ISL_2131785, EPI_ISL_2131786, EPI_ISL_2131787, EPI_ISL_2131788, EPI_ISL_2131789, EPI_ISL_2131790, EPI_ISL_2131791, EPI_ISL_2131792, EPI_ISL_2131793, EPI_ISL_2131794, EPI_ISL_2131795, EPI_ISL_2131796, EPI_ISL_2131797, EPI_ISL_2131798, EPI_ISL_2131799, EPI_ISL_2131800, EPI_ISL_2131801, EPI_ISL_2131802, EPI_ISL_2131803, EPI_ISL_2131804, EPI_ISL_2131805, EPI_ISL_2131806, EPI_ISL_2131807, EPI_ISL_2131808, EPI_ISL_2131809, EPI_ISL_2131810, EPI_ISL_2131811, EPI_ISL_2131812, EPI_ISL_2131813, EPI_ISL_2131814, EPI_ISL_2131815, EPI_ISL_2131816, EPI_ISL_2131817, EPI_ISL_2131818, EPI_ISL_2131819, EPI_ISL_2131820, EPI_ISL_2131821, EPI_ISL_2131822, EPI_ISL_2131823, EPI_ISL_2131824, EPI_ISL_2131825, EPI_ISL_2131826, EPI_ISL_2131827, EPI_ISL_2131828, EPI_ISL_2131829, EPI_ISL_2131830, EPI_ISL_2131831, EPI_ISL_2131832, EPI_ISL_2131833, EPI_ISL_2131834, EPI_ISL_2131835, EPI_ISL_2131836, EPI_ISL_2131837, EPI_ISL_2131838, EPI_ISL_2131839, EPI_ISL_2131840, EPI_ISL_2131841, EPI_ISL_2131842, EPI_ISL_2131843, EPI_ISL_2131844, EPI_ISL_2131845, EPI_ISL_2131846, EPI_ISL_2131847, EPI_ISL_2131848, EPI_ISL_2131849, EPI_ISL_2131850, EPI_ISL_2131851, EPI_ISL_2131852, EPI_ISL_2131853, EPI_ISL_2131854, EPI_ISL_2131855, EPI_ISL_2131856, EPI_ISL_2131857, EPI_ISL_2131858, EPI_ISL_2131859, EPI_ISL_2131860, EPI_ISL_2131861, EPI_ISL_2131862, EPI_ISL_2131863, EPI_ISL_2131864, EPI_ISL_2131865, EPI_ISL_2131866, EPI_ISL_2131867, EPI_ISL_2131868, EPI_ISL_2131869, EPI_ISL_2131870, EPI_ISL_2131871, EPI_ISL_2131872, EPI_ISL_2131873, EPI_ISL_2131874, EPI_ISL_2131875, EPI_ISL_2131876, EPI_ISL_2131877, EPI_ISL_2131878, EPI_ISL_2131879, EPI_ISL_2131880, EPI_ISL_2131881, EPI_ISL_2131882, EPI_ISL_2131883, EPI_ISL_2131884, EPI_ISL_2131885, EPI_ISL_2131886, EPI_ISL_2131887, EPI_ISL_2131888, EPI_ISL_2131889, EPI_ISL_2131890, EPI_ISL_2131891, EPI_ISL_2131892, EPI_ISL_2131893, EPI_ISL_2131894, EPI_ISL_2131895, EPI_ISL_2131896, EPI_ISL_2131897, EPI_ISL_2131898, EPI_ISL_2131899, EPI_ISL_2131900, EPI_ISL_2131901, EPI_ISL_2131902, EPI_ISL_2131903, EPI_ISL_2131904, EPI_ISL_2131905, EPI_ISL_2131906, EPI_ISL_2131907, EPI_ISL_2131908, EPI_ISL_2131909, EPI_ISL_2131910, EPI_ISL_2131911, EPI_ISL_2131912, EPI_ISL_2131913, EPI_ISL_2131914, EPI_ISL_2131915, EPI_ISL_2131916, EPI_ISL_2131917, EPI_ISL_2131918, EPI_ISL_2131919, EPI_ISL_2131920, EPI_ISL_2131921, EPI_ISL_2131922, EPI_ISL_2131923, EPI_ISL_2131924, EPI_ISL_2131925, EPI_ISL_2131926, EPI_ISL_2131927, EPI_ISL_2131928, EPI_ISL_2131929, EPI_ISL_2131930, EPI_ISL_2131931, EPI_ISL_2131932, EPI_ISL_2131933, EPI_ISL_2131934, EPI_ISL_2131935, EPI_ISL_2131936, EPI_ISL_2131937, EPI_ISL_2131938, EPI_ISL_2131939, EPI_ISL_2131940, EPI_ISL_2131941, EPI_ISL_2131942, EPI_ISL_2131943, EPI_ISL_2131944, EPI_ISL_2131945, EPI_ISL_2131946, EPI_ISL_2131947, EPI_ISL_2131948, EPI_ISL_2131949, EPI_ISL_2131950, EPI_ISL_2131951, EPI_ISL_2131952, EPI_ISL_2131953, EPI_ISL_2131954, EPI_ISL_2131955, EPI_ISL_2131956, EPI_ISL_2131957, EPI_ISL_2131958, EPI_ISL_2131959, EPI_ISL_2131960, EPI_ISL_2131961, EPI_ISL_2131962, EPI_ISL_2131963, EPI_ISL_2131964, EPI_ISL_2131965, EPI_ISL_2131966, EPI_ISL_2131967, EPI_ISL_2131968, EPI_ISL_2131969, EPI_ISL_2131970, EPI_ISL_2131971, EPI_ISL_2131972, EPI_ISL_2131973, EPI_ISL_2131974, EPI_ISL_2131975, EPI_ISL_2131976, EPI_ISL_2131977, EPI_ISL_2131978, EPI_ISL_2131979, EPI_ISL_2131980, EPI_ISL_2131981, EPI_ISL_2131982, EPI_ISL_2131983, EPI_ISL_2131984, EPI_ISL_2131985, EPI_ISL_2131986, EPI_ISL_2131987, EPI_ISL_2131988, EPI_ISL_2131989, EPI_ISL_2131990, EPI_ISL_2131991, EPI_ISL_2131992, EPI_ISL_2131993, EPI_ISL_2131994, EPI_ISL_2131995, EPI_ISL_2131996, EPI_ISL_2131997, EPI_ISL_2131998, EPI_ISL_2131999, EPI_ISL_2132000, EPI_ISL_2132001, EPI_ISL_2132002, EPI_ISL_2132003, EPI_ISL_2132004, EPI_ISL_2132005, EPI_ISL_2132006, EPI_ISL_2132007, EPI_ISL_2132008, EPI_ISL_2132009, EPI_ISL_2132010, EPI_ISL_2132011, EPI_ISL_2132012, EPI_ISL_2132013, EPI_ISL_2132014, EPI_ISL_2132015, EPI_ISL_2132016, EPI_ISL_2132017, EPI_ISL_2132018, EPI_ISL_2132019, EPI_ISL_2132020, EPI_ISL_2132021, EPI_ISL_2132022, EPI_ISL_2132023, EPI_ISL_2132024, EPI_ISL_2132025, EPI_ISL_2132026, EPI_ISL_2132027, EPI_ISL_2132028, EPI_ISL_2132029, EPI_ISL_2132030, EPI_ISL_2132031, EPI_ISL_2132032, EPI_ISL_2132033, EPI_ISL_2132034, EPI_ISL_2132035, EPI_ISL_2132036, EPI_ISL_2132037, EPI_ISL_2132038, EPI_ISL_2132039, EPI_ISL_2132040, EPI_ISL_2132041, EPI_ISL_2132042, EPI_ISL_2132043, EPI_ISL_2132044, EPI_ISL_2132045, EPI_ISL_2132046, EPI_ISL_2132047, EPI_ISL_2132048, EPI_ISL_2132049, EPI_ISL_2132050, EPI_ISL_2132051, EPI_ISL_2132052, EPI_ISL_2132053, EPI_ISL_2132054, EPI_ISL_2132055, EPI_ISL_2132056, EPI_ISL_2132057, EPI_ISL_2132058, EPI_ISL_2132059, EPI_ISL_2132060, EPI_ISL_2132061, EPI_ISL_2132062, EPI_ISL_2132063, EPI_ISL_2132064, EPI_ISL_2132065, EPI_ISL_2132066, EPI_ISL_2132067, EPI_ISL_2132068, EPI_ISL_2132069, EPI_ISL_2132070, EPI_ISL_2132071, EPI_ISL_2132072, EPI_ISL_2132073, EPI_ISL_2132074, EPI_ISL_2132075, EPI_ISL_2132076, EPI_ISL_2132077, EPI_ISL_2132078, EPI_ISL_2132079, EPI_ISL_2132080, EPI_ISL_2132081, EPI_ISL_2132082, EPI_ISL_2132083, EPI_ISL_2132084, EPI_ISL_2132085, EPI_ISL_2132086, EPI_ISL_2132087, EPI_ISL_2132088, EPI_ISL_2132089, EPI_ISL_2132090, EPI_ISL_2132091, EPI_ISL_2132092, EPI_ISL_2132093, EPI_ISL_2132094, EPI_ISL_2132095, EPI_ISL_2132096, EPI_ISL_2132097, EPI_ISL_2132098, EPI_ISL_2132099, EPI_ISL_2132100, EPI_ISL_2132101, EPI_ISL_2132102, EPI_ISL_2132103, EPI_ISL_2132104, EPI_ISL_2132105, EPI_ISL_2132106, EPI_ISL_2132107, EPI_ISL_2132108, EPI_ISL_2132109, EPI_ISL_2132110, EPI_ISL_2132111, EPI_ISL_2132112, EPI_ISL_2132113, EPI_ISL_2132114, EPI_ISL_2132115, EPI_ISL_2132116, EPI_ISL_2132117, EPI_ISL_2132118, EPI_ISL_2132119, EPI_ISL_2132120, EPI_ISL_2132121, EPI_ISL_2132122, EPI_ISL_2132123, EPI_ISL_2132124, EPI_ISL_2132125, EPI_ISL_2132126, EPI_ISL_2132127, EPI_ISL_2132128, EPI_ISL_2132129, EPI_ISL_2132130, EPI_ISL_2132131, EPI_ISL_2132132, EPI_ISL_2132133, EPI_ISL_2132134, EPI_ISL_2132135, EPI_ISL_2132136, EPI_ISL_2132137, EPI_ISL_2132138, EPI_ISL_2132139, EPI_ISL_2132140, EPI_ISL_2132141, EPI_ISL_2132142, EPI_ISL_2132143, EPI_ISL_2132144, EPI_ISL_2132145, EPI_ISL_2132146, EPI_ISL_2132147, EPI_ISL_2132148, EPI_ISL_2132149, EPI_ISL_2132150, EPI_ISL_2132151, EPI_ISL_2132152, EPI_ISL_2132153, EPI_ISL_2132154, EPI_ISL_2132155, EPI_ISL_2132156, EPI_ISL_2132157, EPI_ISL_2132158, EPI_ISL_2132159, EPI_ISL_2132160, EPI_ISL_2132161, EPI_ISL_2132162, EPI_ISL_2132163, EPI_ISL_2132164, EPI_ISL_2132165, EPI_ISL_2132166, EPI_ISL_2132167, EPI_ISL_2132168, EPI_ISL_2132169, EPI_ISL_2132170, EPI_ISL_2132171, EPI_ISL_2132172, EPI_ISL_2132173, EPI_ISL_2132174, EPI_ISL_2132175, EPI_ISL_2132176, EPI_ISL_2132177, EPI_ISL_2132178, EPI_ISL_2132179, EPI_ISL_2132180, EPI_ISL_2132181, EPI_ISL_2132182, EPI_ISL_2132183, EPI_ISL_2132184, EPI_ISL_2132185, EPI_ISL_2132186, EPI_ISL_2132187, EPI_ISL_2132188, EPI_ISL_2132189, EPI_ISL_2132190, EPI_ISL_2132191, EPI_ISL_2132192, EPI_ISL_2132193, EPI_ISL_2132194, EPI_ISL_2132195, EPI_ISL_2132196, EPI_ISL_2132197, EPI_ISL_2132198, EPI_ISL_2132199, EPI_ISL_2132200, EPI_ISL_2132201, EPI_ISL_2132202, EPI_ISL_2132203, EPI_ISL_2132204, EPI_ISL_2132205, EPI_ISL_2132206, EPI_ISL_2132207, EPI_ISL_2132208, EPI_ISL_2132209, EPI_ISL_2132210, EPI_ISL_2132211, EPI_ISL_2132212, EPI_ISL_2132213, EPI_ISL_2132214, EPI_ISL_2132215, EPI_ISL_2132216, EPI_ISL_2132217, EPI_ISL_2132218, EPI_ISL_2132219, EPI_ISL_2132220, EPI_ISL_2132221, EPI_ISL_2132222, EPI_ISL_2132223, EPI_ISL_2132224, EPI_ISL_2132225, EPI_ISL_2132226, EPI_ISL_2132227, EPI_ISL_2132228, EPI_ISL_2132229, EPI_ISL_2132230, EPI_ISL_2132231, EPI_ISL_2132232, EPI_ISL_2132233, EPI_ISL_2132234, EPI_ISL_2132235, EPI_ISL_2132236, EPI_ISL_2132237, EPI_ISL_2132238, EPI_ISL_2132239, EPI_ISL_2132240, EPI_ISL_2132241, EPI_ISL_2132242, EPI_ISL_2132243, EPI_ISL_2132244, EPI_ISL_2132245, EPI_ISL_2132246, EPI_ISL_2132247, EPI_ISL_2132248, EPI_ISL_2132249, EPI_ISL_2132250, EPI_ISL_2132251, EPI_ISL_2132252, EPI_ISL_2132253, EPI_ISL_2132254, EPI_ISL_2132255, EPI_ISL_2132256, EPI_ISL_2132257, EPI_ISL_2132258, EPI_ISL_2132259, EPI_ISL_2132260, EPI_ISL_2132261, EPI_ISL_2132262, EPI_ISL_2132263, EPI_ISL_2132264, EPI_ISL_2132265, EPI_ISL_2132266, EPI_ISL_2132267, EPI_ISL_2132268, EPI_ISL_2132269, EPI_ISL_2132270, EPI_ISL_2132271, EPI_ISL_2132272, EPI_ISL_2132273, EPI_ISL_2132274, EPI_ISL_2132275, EPI_ISL_2132276, EPI_ISL_2132277, EPI_ISL_2132278, EPI_ISL_2132279, EPI_ISL_2132280, EPI_ISL_2132281, EPI_ISL_2132282, EPI_ISL_2132283, EPI_ISL_2132284, EPI_ISL_2132285, EPI_ISL_2132286, EPI_ISL_2132287, EPI_ISL_2132288, EPI_ISL_2132289, EPI_ISL_2132290, EPI_ISL_2132291, EPI_ISL_2132292, EPI_ISL_2132293, EPI_ISL_2132294, EPI_ISL_2132295, EPI_ISL_2132296, EPI_ISL_2132297, EPI_ISL_2132298, EPI_ISL_2132299, EPI_ISL_2132300, EPI_ISL_2132301, EPI_ISL_2132302, EPI_ISL_2132303, EPI_ISL_2132304, EPI_ISL_2132305, EPI_ISL_2132306, EPI_ISL_2132307, EPI_ISL_2132308, EPI_ISL_2132309, EPI_ISL_2132310, EPI_ISL_2132311, EPI_ISL_2132312, EPI_ISL_2132313, EPI_ISL_2132314, EPI_ISL_2132315, EPI_ISL_2132316, EPI_ISL_2132317, EPI_ISL_2132318, EPI_ISL_2132319, EPI_ISL_2132320, EPI_ISL_2132321, EPI_ISL_2132322, EPI_ISL_2132323, EPI_ISL_2132324, EPI_ISL_2132325, EPI_ISL_2132326, EPI_ISL_2132327 | see above                                                                                                          | SARS-CoV-2 testing team, National Institute of Infectious Diseases                                                 | Pathogen Genomics Center, National Institute of Infectious Diseases                                                                                                                                                                                                                                                                                                                                                                                                                                                                                                | Hazuka Y Furihata; Hiromizu Takahashi; Kentaro Itokawa; Makoto Kuroda; Masanori Hashino; Masumichi Saito; Naomi Nojiri; Nozomu Hanaoka; Rina Tanaka; Sana Uchikoba; Tsuguto Fujimoto; Tsuyoshi Sekizuka                                                                                                                                                                                                                    |
| EPI_ISL_1647029                                                                                                                                                                                                                                                                                                                                                                                                                                                                                                                                                                                                                                                                                                                                                                                                                                                                                                                                                                                                                                                                                                                                                                                                                                                                                                                                                                                                                                                                                                                                                                                                                                                                                                                                                                                                                                                                                                                                                                                                                                                                                                                                                                                                                                                                                                                                                                                                                                                                                                                                                                                                                                                                                                                                                                                                                                                                                                                                                                                                                                                                                                                                                                                                                                                                                                                                                                                                                                                                                                                                                                                                                                                                                                                                                                                                                                                                                                                                                                                                                                                                                                                                                                                                                                                                                                                                                                                                                                                                                                                                                                                                                                                                                                                                                                                                                                                                                                                                                                                                                                                                                                                                                                                                                                                                                                                                                                                                                                                                                                                                                                                                                                                                                                                                                                                                                                                                                                                                                                                                                                                                                                                                                                                                                                                                                                                                                                                                                                                                                                                                                                                                                                                                                                                                                                                                                                                                                                                                                                                                                                                                                                                                                                                                                                                                                                                                                                                                                                                                                                                                                                                                                                                                                                                                                                                                                                                                                                                                                                                                                                                                                                                                                                                                                                                                                                                                                                                                                                                                                                                                                                                                                                                                                                                                                                                                                                                                                                                                                                                                                                                                                                                                                                                                                                                                                                                                                                                                                                                                                                                                                                                                                                                                                                                                                                                                                                                                                                                                                                                                                                                                                                                                                                                                                                                                                                                                                                                                                                                                                                                                                                                                                                                                                                                                                                                                                                                                                                                                                                                                                                                                                                                                                                                                                                                                                                                                                                                                                                                                                                                                                              | SC (UCO) Igiene e Sanità Pubblica (funzione integrata con SC Microbiologia e Virologia)                            | ARGO Laboratorio Genomica ed Epigenomica                                                                           | D'Agaro P; Dal Monego S; Degasperì M; Licastro D; Lombardo F                                                                                                                                                                                                                                                                                                                                                                                                                                                                                                       |                                                                                                                                                                                                                                                                                                                                                                                                                            |
| EPI_ISL_2209145                                                                                                                                                                                                                                                                                                                                                                                                                                                                                                                                                                                                                                                                                                                                                                                                                                                                                                                                                                                                                                                                                                                                                                                                                                                                                                                                                                                                                                                                                                                                                                                                                                                                                                                                                                                                                                                                                                                                                                                                                                                                                                                                                                                                                                                                                                                                                                                                                                                                                                                                                                                                                                                                                                                                                                                                                                                                                                                                                                                                                                                                                                                                                                                                                                                                                                                                                                                                                                                                                                                                                                                                                                                                                                                                                                                                                                                                                                                                                                                                                                                                                                                                                                                                                                                                                                                                                                                                                                                                                                                                                                                                                                                                                                                                                                                                                                                                                                                                                                                                                                                                                                                                                                                                                                                                                                                                                                                                                                                                                                                                                                                                                                                                                                                                                                                                                                                                                                                                                                                                                                                                                                                                                                                                                                                                                                                                                                                                                                                                                                                                                                                                                                                                                                                                                                                                                                                                                                                                                                                                                                                                                                                                                                                                                                                                                                                                                                                                                                                                                                                                                                                                                                                                                                                                                                                                                                                                                                                                                                                                                                                                                                                                                                                                                                                                                                                                                                                                                                                                                                                                                                                                                                                                                                                                                                                                                                                                                                                                                                                                                                                                                                                                                                                                                                                                                                                                                                                                                                                                                                                                                                                                                                                                                                                                                                                                                                                                                                                                                                                                                                                                                                                                                                                                                                                                                                                                                                                                                                                                                                                                                                                                                                                                                                                                                                                                                                                                                                                                                                                                                                                                                                                                                                                                                                                                                                                                                                                                                                                                                                                                                              | SECRETARIA MUNICIPAL DE SAUDE DE CORDEIROPOLIS                                                                     | Instituto Butantan / FZEA-USP-Pirassununga                                                                         | Antonio Jorge Martins; Claudia Renata dos Santos Barros; David Schlesinger; Debora Botequio Moretti; Dimas Tadeu Covas; Elaine Cristina Marqueeze; Elaine Vieira Santos; Evandra Strazza Rodrigues; Heidge Fukumasu; Jayme Augusto de Souza-Neto; José Salvatore Leister Patané; Luiz Alcântara; Luiz Lehmann Coutinho; Maria Carolina Elias; Maurício Lacerda Nogueira; Rafael dos Santos Bezerra; Raul Machado Neto; Rejane Maria Tommasini Grotto; Ricardo Haddad; Sandra Coccuzzo Sampaio Vessoni; Simone Kashima; Svetoslav Nanev Slavov; Vincent Louis Viala |                                                                                                                                                                                                                                                                                                                                                                                                                            |
| EPI_ISL_2015901, EPI_ISL_2015915                                                                                                                                                                                                                                                                                                                                                                                                                                                                                                                                                                                                                                                                                                                                                                                                                                                                                                                                                                                                                                                                                                                                                                                                                                                                                                                                                                                                                                                                                                                                                                                                                                                                                                                                                                                                                                                                                                                                                                                                                                                                                                                                                                                                                                                                                                                                                                                                                                                                                                                                                                                                                                                                                                                                                                                                                                                                                                                                                                                                                                                                                                                                                                                                                                                                                                                                                                                                                                                                                                                                                                                                                                                                                                                                                                                                                                                                                                                                                                                                                                                                                                                                                                                                                                                                                                                                                                                                                                                                                                                                                                                                                                                                                                                                                                                                                                                                                                                                                                                                                                                                                                                                                                                                                                                                                                                                                                                                                                                                                                                                                                                                                                                                                                                                                                                                                                                                                                                                                                                                                                                                                                                                                                                                                                                                                                                                                                                                                                                                                                                                                                                                                                                                                                                                                                                                                                                                                                                                                                                                                                                                                                                                                                                                                                                                                                                                                                                                                                                                                                                                                                                                                                                                                                                                                                                                                                                                                                                                                                                                                                                                                                                                                                                                                                                                                                                                                                                                                                                                                                                                                                                                                                                                                                                                                                                                                                                                                                                                                                                                                                                                                                                                                                                                                                                                                                                                                                                                                                                                                                                                                                                                                                                                                                                                                                                                                                                                                                                                                                                                                                                                                                                                                                                                                                                                                                                                                                                                                                                                                                                                                                                                                                                                                                                                                                                                                                                                                                                                                                                                                                                                                                                                                                                                                                                                                                                                                                                                                                                                                                                                             | SELARI MIRIALIS CLUSES                                                                                             | CNR Virus des Infections Respiratoires - France SUD                                                                | Antonin Bal; Bruno Lina; Gregory Destras; Gwendolyne Burfin; Hadrien Regue; Laurence Josset; Martine Valette; Quentin Semanas                                                                                                                                                                                                                                                                                                                                                                                                                                      |                                                                                                                                                                                                                                                                                                                                                                                                                            |
| EPI_ISL_2308605                                                                                                                                                                                                                                                                                                                                                                                                                                                                                                                                                                                                                                                                                                                                                                                                                                                                                                                                                                                                                                                                                                                                                                                                                                                                                                                                                                                                                                                                                                                                                                                                                                                                                                                                                                                                                                                                                                                                                                                                                                                                                                                                                                                                                                                                                                                                                                                                                                                                                                                                                                                                                                                                                                                                                                                                                                                                                                                                                                                                                                                                                                                                                                                                                                                                                                                                                                                                                                                                                                                                                                                                                                                                                                                                                                                                                                                                                                                                                                                                                                                                                                                                                                                                                                                                                                                                                                                                                                                                                                                                                                                                                                                                                                                                                                                                                                                                                                                                                                                                                                                                                                                                                                                                                                                                                                                                                                                                                                                                                                                                                                                                                                                                                                                                                                                                                                                                                                                                                                                                                                                                                                                                                                                                                                                                                                                                                                                                                                                                                                                                                                                                                                                                                                                                                                                                                                                                                                                                                                                                                                                                                                                                                                                                                                                                                                                                                                                                                                                                                                                                                                                                                                                                                                                                                                                                                                                                                                                                                                                                                                                                                                                                                                                                                                                                                                                                                                                                                                                                                                                                                                                                                                                                                                                                                                                                                                                                                                                                                                                                                                                                                                                                                                                                                                                                                                                                                                                                                                                                                                                                                                                                                                                                                                                                                                                                                                                                                                                                                                                                                                                                                                                                                                                                                                                                                                                                                                                                                                                                                                                                                                                                                                                                                                                                                                                                                                                                                                                                                                                                                                                                                                                                                                                                                                                                                                                                                                                                                                                                                                                                                              | SIESP DIPARTIMENTO DI PREVENZIONE CHIETI                                                                           | Istituto Zooprofilattico Sperimentale dell'Abruzzo e Molise "G. Caporale"                                          | Ancora M; Calistri P; Cammà C; Caporale M; Curini V; Delli Compagni E; Di Domenico M; Di Lollo Valeria; Di Pasquale A; Lorusso A; Mangone I; Marcacci M; Puglia I; Rinaldi A; Savini G; Scialabba S                                                                                                                                                                                                                                                                                                                                                                |                                                                                                                                                                                                                                                                                                                                                                                                                            |
| EPI_ISL_2536217, EPI_ISL_2536220                                                                                                                                                                                                                                                                                                                                                                                                                                                                                                                                                                                                                                                                                                                                                                                                                                                                                                                                                                                                                                                                                                                                                                                                                                                                                                                                                                                                                                                                                                                                                                                                                                                                                                                                                                                                                                                                                                                                                                                                                                                                                                                                                                                                                                                                                                                                                                                                                                                                                                                                                                                                                                                                                                                                                                                                                                                                                                                                                                                                                                                                                                                                                                                                                                                                                                                                                                                                                                                                                                                                                                                                                                                                                                                                                                                                                                                                                                                                                                                                                                                                                                                                                                                                                                                                                                                                                                                                                                                                                                                                                                                                                                                                                                                                                                                                                                                                                                                                                                                                                                                                                                                                                                                                                                                                                                                                                                                                                                                                                                                                                                                                                                                                                                                                                                                                                                                                                                                                                                                                                                                                                                                                                                                                                                                                                                                                                                                                                                                                                                                                                                                                                                                                                                                                                                                                                                                                                                                                                                                                                                                                                                                                                                                                                                                                                                                                                                                                                                                                                                                                                                                                                                                                                                                                                                                                                                                                                                                                                                                                                                                                                                                                                                                                                                                                                                                                                                                                                                                                                                                                                                                                                                                                                                                                                                                                                                                                                                                                                                                                                                                                                                                                                                                                                                                                                                                                                                                                                                                                                                                                                                                                                                                                                                                                                                                                                                                                                                                                                                                                                                                                                                                                                                                                                                                                                                                                                                                                                                                                                                                                                                                                                                                                                                                                                                                                                                                                                                                                                                                                                                                                                                                                                                                                                                                                                                                                                                                                                                                                                                                                             | SISP Lecce                                                                                                         | University of Bari Biomedical Sciences and Human Oncology                                                          | Accogli M.; Chironna M.; Loconsole D.; Maria Chironna; Sallustio A.                                                                                                                                                                                                                                                                                                                                                                                                                                                                                                |                                                                                                                                                                                                                                                                                                                                                                                                                            |
| EPI_ISL_2562991, EPI_ISL_2563614, EPI_ISL_2565476, EPI_ISL_2586557, EPI_ISL_2586939, EPI_ISL_2587054, EPI_ISL_2587530                                                                                                                                                                                                                                                                                                                                                                                                                                                                                                                                                                                                                                                                                                                                                                                                                                                                                                                                                                                                                                                                                                                                                                                                                                                                                                                                                                                                                                                                                                                                                                                                                                                                                                                                                                                                                                                                                                                                                                                                                                                                                                                                                                                                                                                                                                                                                                                                                                                                                                                                                                                                                                                                                                                                                                                                                                                                                                                                                                                                                                                                                                                                                                                                                                                                                                                                                                                                                                                                                                                                                                                                                                                                                                                                                                                                                                                                                                                                                                                                                                                                                                                                                                                                                                                                                                                                                                                                                                                                                                                                                                                                                                                                                                                                                                                                                                                                                                                                                                                                                                                                                                                                                                                                                                                                                                                                                                                                                                                                                                                                                                                                                                                                                                                                                                                                                                                                                                                                                                                                                                                                                                                                                                                                                                                                                                                                                                                                                                                                                                                                                                                                                                                                                                                                                                                                                                                                                                                                                                                                                                                                                                                                                                                                                                                                                                                                                                                                                                                                                                                                                                                                                                                                                                                                                                                                                                                                                                                                                                                                                                                                                                                                                                                                                                                                                                                                                                                                                                                                                                                                                                                                                                                                                                                                                                                                                                                                                                                                                                                                                                                                                                                                                                                                                                                                                                                                                                                                                                                                                                                                                                                                                                                                                                                                                                                                                                                                                                                                                                                                                                                                                                                                                                                                                                                                                                                                                                                                                                                                                                                                                                                                                                                                                                                                                                                                                                                                                                                                                                                                                                                                                                                                                                                                                                                                                                                                                                                                                                                        | see above                                                                                                          | SK-Roy Romanow Provincial Laboratory                                                                               | National Microbiology Laboratory (NML)                                                                                                                                                                                                                                                                                                                                                                                                                                                                                                                             | Amanda Lang; Anna Majer; Anneliese Landgraff; CanCOGE's metadata curation team; Darian Hole; Elsie Grudski; Gary Van Domselaar; Grace Seo; Jennifer Tanner; Jessica Minion; Kirsten Biggar; Madison Chapel; Morag Graham; Natalie Knox; Nathalie Bastien; Philip Mabon; Public Health Agency of Canada CanCOGE team; Rachel DePaulo; Rhiamon Huzarewich; Russell Mandes; Ryan McDonald; Shari Tyson; Timothy Booth; Yan Li |
| EPI_ISL_2341727                                                                                                                                                                                                                                                                                                                                                                                                                                                                                                                                                                                                                                                                                                                                                                                                                                                                                                                                                                                                                                                                                                                                                                                                                                                                                                                                                                                                                                                                                                                                                                                                                                                                                                                                                                                                                                                                                                                                                                                                                                                                                                                                                                                                                                                                                                                                                                                                                                                                                                                                                                                                                                                                                                                                                                                                                                                                                                                                                                                                                                                                                                                                                                                                                                                                                                                                                                                                                                                                                                                                                                                                                                                                                                                                                                                                                                                                                                                                                                                                                                                                                                                                                                                                                                                                                                                                                                                                                                                                                                                                                                                                                                                                                                                                                                                                                                                                                                                                                                                                                                                                                                                                                                                                                                                                                                                                                                                                                                                                                                                                                                                                                                                                                                                                                                                                                                                                                                                                                                                                                                                                                                                                                                                                                                                                                                                                                                                                                                                                                                                                                                                                                                                                                                                                                                                                                                                                                                                                                                                                                                                                                                                                                                                                                                                                                                                                                                                                                                                                                                                                                                                                                                                                                                                                                                                                                                                                                                                                                                                                                                                                                                                                                                                                                                                                                                                                                                                                                                                                                                                                                                                                                                                                                                                                                                                                                                                                                                                                                                                                                                                                                                                                                                                                                                                                                                                                                                                                                                                                                                                                                                                                                                                                                                                                                                                                                                                                                                                                                                                                                                                                                                                                                                                                                                                                                                                                                                                                                                                                                                                                                                                                                                                                                                                                                                                                                                                                                                                                                                                                                                                                                                                                                                                                                                                                                                                                                                                                                                                                                                                                                              | SLN Medical College and Hospital, Koraput                                                                          | Institute of Life Sciences - INSACOG                                                                               | Ajay Parida; Amol M. Kanampalliwar; Arup Ghosh; Atimukta Jha; INSACOG Consortium; Omprakash Shiriwas; Punit Prasad; Rajeeb Swain; Rupesh Dash; Safal Walla; Sana Fatma; Shifu Aggarwal; Sunil K. Raghav                                                                                                                                                                                                                                                                                                                                                            |                                                                                                                                                                                                                                                                                                                                                                                                                            |
| EPI_ISL_2728471                                                                                                                                                                                                                                                                                                                                                                                                                                                                                                                                                                                                                                                                                                                                                                                                                                                                                                                                                                                                                                                                                                                                                                                                                                                                                                                                                                                                                                                                                                                                                                                                                                                                                                                                                                                                                                                                                                                                                                                                                                                                                                                                                                                                                                                                                                                                                                                                                                                                                                                                                                                                                                                                                                                                                                                                                                                                                                                                                                                                                                                                                                                                                                                                                                                                                                                                                                                                                                                                                                                                                                                                                                                                                                                                                                                                                                                                                                                                                                                                                                                                                                                                                                                                                                                                                                                                                                                                                                                                                                                                                                                                                                                                                                                                                                                                                                                                                                                                                                                                                                                                                                                                                                                                                                                                                                                                                                                                                                                                                                                                                                                                                                                                                                                                                                                                                                                                                                                                                                                                                                                                                                                                                                                                                                                                                                                                                                                                                                                                                                                                                                                                                                                                                                                                                                                                                                                                                                                                                                                                                                                                                                                                                                                                                                                                                                                                                                                                                                                                                                                                                                                                                                                                                                                                                                                                                                                                                                                                                                                                                                                                                                                                                                                                                                                                                                                                                                                                                                                                                                                                                                                                                                                                                                                                                                                                                                                                                                                                                                                                                                                                                                                                                                                                                                                                                                                                                                                                                                                                                                                                                                                                                                                                                                                                                                                                                                                                                                                                                                                                                                                                                                                                                                                                                                                                                                                                                                                                                                                                                                                                                                                                                                                                                                                                                                                                                                                                                                                                                                                                                                                                                                                                                                                                                                                                                                                                                                                                                                                                                                                                                              | SRI JAYADEVA INSTITUTE OF CARDIOLOGY                                                                               | INSACOG-KA, NIMHANS                                                                                                | Ananthapadmanabha Kotambail; Anita S Desai; Anson Kunjumon George; Chetan G K; Chitra Pattabiraman; Darshan Sreenivas; Ellango Ramasamy; Gautham Arunachal Udupi; Mahesh Kumar.C.S; Sony Sharma; V Ravi                                                                                                                                                                                                                                                                                                                                                            |                                                                                                                                                                                                                                                                                                                                                                                                                            |
| EPI_ISL_1939973                                                                                                                                                                                                                                                                                                                                                                                                                                                                                                                                                                                                                                                                                                                                                                                                                                                                                                                                                                                                                                                                                                                                                                                                                                                                                                                                                                                                                                                                                                                                                                                                                                                                                                                                                                                                                                                                                                                                                                                                                                                                                                                                                                                                                                                                                                                                                                                                                                                                                                                                                                                                                                                                                                                                                                                                                                                                                                                                                                                                                                                                                                                                                                                                                                                                                                                                                                                                                                                                                                                                                                                                                                                                                                                                                                                                                                                                                                                                                                                                                                                                                                                                                                                                                                                                                                                                                                                                                                                                                                                                                                                                                                                                                                                                                                                                                                                                                                                                                                                                                                                                                                                                                                                                                                                                                                                                                                                                                                                                                                                                                                                                                                                                                                                                                                                                                                                                                                                                                                                                                                                                                                                                                                                                                                                                                                                                                                                                                                                                                                                                                                                                                                                                                                                                                                                                                                                                                                                                                                                                                                                                                                                                                                                                                                                                                                                                                                                                                                                                                                                                                                                                                                                                                                                                                                                                                                                                                                                                                                                                                                                                                                                                                                                                                                                                                                                                                                                                                                                                                                                                                                                                                                                                                                                                                                                                                                                                                                                                                                                                                                                                                                                                                                                                                                                                                                                                                                                                                                                                                                                                                                                                                                                                                                                                                                                                                                                                                                                                                                                                                                                                                                                                                                                                                                                                                                                                                                                                                                                                                                                                                                                                                                                                                                                                                                                                                                                                                                                                                                                                                                                                                                                                                                                                                                                                                                                                                                                                                                                                                                                                                              | SUBRAMANYA NAGAR                                                                                                   | inStem NCBS - INSACOG                                                                                              | Uma Ramakrishnan Dasaradhi Palakodeti Aswin SaiNarain                                                                                                                                                                                                                                                                                                                                                                                                                                                                                                              |                                                                                                                                                                                                                                                                                                                                                                                                                            |
| EPI_ISL_1939974                                                                                                                                                                                                                                                                                                                                                                                                                                                                                                                                                                                                                                                                                                                                                                                                                                                                                                                                                                                                                                                                                                                                                                                                                                                                                                                                                                                                                                                                                                                                                                                                                                                                                                                                                                                                                                                                                                                                                                                                                                                                                                                                                                                                                                                                                                                                                                                                                                                                                                                                                                                                                                                                                                                                                                                                                                                                                                                                                                                                                                                                                                                                                                                                                                                                                                                                                                                                                                                                                                                                                                                                                                                                                                                                                                                                                                                                                                                                                                                                                                                                                                                                                                                                                                                                                                                                                                                                                                                                                                                                                                                                                                                                                                                                                                                                                                                                                                                                                                                                                                                                                                                                                                                                                                                                                                                                                                                                                                                                                                                                                                                                                                                                                                                                                                                                                                                                                                                                                                                                                                                                                                                                                                                                                                                                                                                                                                                                                                                                                                                                                                                                                                                                                                                                                                                                                                                                                                                                                                                                                                                                                                                                                                                                                                                                                                                                                                                                                                                                                                                                                                                                                                                                                                                                                                                                                                                                                                                                                                                                                                                                                                                                                                                                                                                                                                                                                                                                                                                                                                                                                                                                                                                                                                                                                                                                                                                                                                                                                                                                                                                                                                                                                                                                                                                                                                                                                                                                                                                                                                                                                                                                                                                                                                                                                                                                                                                                                                                                                                                                                                                                                                                                                                                                                                                                                                                                                                                                                                                                                                                                                                                                                                                                                                                                                                                                                                                                                                                                                                                                                                                                                                                                                                                                                                                                                                                                                                                                                                                                                                                                                              | SUBRAMANYA NAGAR                                                                                                   | inStem NCBS - INSACOG                                                                                              | Uma Ramakrishnan Dasaradhi Palakodeti Aswin SaiNarain                                                                                                                                                                                                                                                                                                                                                                                                                                                                                                              |                                                                                                                                                                                                                                                                                                                                                                                                                            |
| EPI_ISL_1171610, EPI_ISL_1493029, EPI_ISL_1671957, EPI_ISL_1919655, EPI_ISL_2003304, EPI_ISL_2348573, EPI_ISL_2382812, EPI_ISL_2402378, EPI_ISL_2402390, EPI_ISL_2402399, EPI_ISL_2402399, EPI_ISL_2402443, EPI_ISL_2426583, EPI_ISL_2426585, EPI                                                                                                                                                                                                                                                                                                                                                                                                                                                                                                                                                                                                                                                                                                                                                                                                                                                                                                                                                                                                                                                                                                                                                                                                                                                                                                                                                                                                                                                                                                                                                                                                                                                                                                                                                                                                                                                                                                                                                                                                                                                                                                                                                                                                                                                                                                                                                                                                                                                                                                                                                                                                                                                                                                                                                                                                                                                                                                                                                                                                                                                                                                                                                                                                                                                                                                                                                                                                                                                                                                                                                                                                                                                                                                                                                                                                                                                                                                                                                                                                                                                                                                                                                                                                                                                                                                                                                                                                                                                                                                                                                                                                                                                                                                                                                                                                                                                                                                                                                                                                                                                                                                                                                                                                                                                                                                                                                                                                                                                                                                                                                                                                                                                                                                                                                                                                                                                                                                                                                                                                                                                                                                                                                                                                                                                                                                                                                                                                                                                                                                                                                                                                                                                                                                                                                                                                                                                                                                                                                                                                                                                                                                                                                                                                                                                                                                                                                                                                                                                                                                                                                                                                                                                                                                                                                                                                                                                                                                                                                                                                                                                                                                                                                                                                                                                                                                                                                                                                                                                                                                                                                                                                                                                                                                                                                                                                                                                                                                                                                                                                                                                                                                                                                                                                                                                                                                                                                                                                                                                                                                                                                                                                                                                                                                                                                                                                                                                                                                                                                                                                                                                                                                                                                                                                                                                                                                                                                                                                                                                                                                                                                                                                                                                                                                                                                                                                                                                                                                                                                                                                                                                                                                                                                                                                                                                                                                                            |                                                                                                                    |                                                                                                                    |                                                                                                                                                                                                                                                                                                                                                                                                                                                                                                                                                                    |                                                                                                                                                                                                                                                                                                                                                                                                                            |

|                                                                                                                                                                                                                                                                                                                                                                                                                                                                                                                                                                                                                                                                                                                                                                             |                                                                                                     |                                                                                                                      |                                                                                                                                                                                                                                                                                                                                                                                                                                                                                                                                                                                                                                                                                                                                                                                                                                   |
|-----------------------------------------------------------------------------------------------------------------------------------------------------------------------------------------------------------------------------------------------------------------------------------------------------------------------------------------------------------------------------------------------------------------------------------------------------------------------------------------------------------------------------------------------------------------------------------------------------------------------------------------------------------------------------------------------------------------------------------------------------------------------------|-----------------------------------------------------------------------------------------------------|----------------------------------------------------------------------------------------------------------------------|-----------------------------------------------------------------------------------------------------------------------------------------------------------------------------------------------------------------------------------------------------------------------------------------------------------------------------------------------------------------------------------------------------------------------------------------------------------------------------------------------------------------------------------------------------------------------------------------------------------------------------------------------------------------------------------------------------------------------------------------------------------------------------------------------------------------------------------|
| see above                                                                                                                                                                                                                                                                                                                                                                                                                                                                                                                                                                                                                                                                                                                                                                   | Sheikh Bhikhari Medical College, Hazaribag                                                          | Institute of Life Sciences - INSACOG                                                                                 | Ajay Parida; Amol M. Kanampalliwar; Arup Ghosh; Atimukta Jha; INSACOG Consortium; Omprakash Shiriwars; Punit Prasad; Rajeeb Swain; Rupesh Dash; Safal Walia; Sana Fatma; Shifu Aggarwal; Sunil K. Raghav                                                                                                                                                                                                                                                                                                                                                                                                                                                                                                                                                                                                                          |
| EPI_ISL_2405171, EPI_ISL_2405177, EPI_ISL_2500849                                                                                                                                                                                                                                                                                                                                                                                                                                                                                                                                                                                                                                                                                                                           | Shenzhen Center for Disease Control and Prevention                                                  | National Institute for Viral Disease Control and Prevention, China CDC                                               | Can Zhu; ChunLi Wu; DaNa Huang; Hang Zhang; Jiancheng Chen; Le Zuo; Long Chen; Peihua Niu; RenLi Zhang; Renli Zhang; ShaoYu Deng; Shaoyu Deng; WeiHua Wu; Weihua Wu; Xiang Zhao; XiaoLiang Xiao; XinYi Wei; Xinyi Wei; YaQing He; Yaqing He; Yenan Feng; Ying Sun; Yue Li                                                                                                                                                                                                                                                                                                                                                                                                                                                                                                                                                         |
| EPI_ISL_2106239                                                                                                                                                                                                                                                                                                                                                                                                                                                                                                                                                                                                                                                                                                                                                             | Siem Reap Provincial Laboratory                                                                     | Virology Unit, Institut Pasteur du Cambodge                                                                          | Cecile Troupin; Chau Darapheak; Chin Savuth; Erik A Karlsson; Jurre Y Siegers; Kraing Sidonn; Lamléav Leak; Leakhena Pum; Ly Sovann; Veasna Duong; Yi Sengdoeurm                                                                                                                                                                                                                                                                                                                                                                                                                                                                                                                                                                                                                                                                  |
| EPI_ISL_1844241                                                                                                                                                                                                                                                                                                                                                                                                                                                                                                                                                                                                                                                                                                                                                             | Sonic - MVZ Medizinisches Labor Bremen GmbH                                                         | Robert Koch Institute                                                                                                |                                                                                                                                                                                                                                                                                                                                                                                                                                                                                                                                                                                                                                                                                                                                                                                                                                   |
| EPI_ISL_490027, EPI_ISL_490040, EPI_ISL_544970, EPI_ISL_593689, EPI_ISL_1098650, EPI_ISL_1098651, EPI_ISL_1098652, EPI_ISL_1383240, EPI_ISL_1383242, EPI_ISL_1383243, EPI_ISL_1904449, EPI_ISL_1904454, EPI_ISL_1904457, EPI_ISL_1904459, EPI_ISL_1904460, EPI_ISL_1904461, EPI_ISL_1904462, EPI_ISL_1904463, EPI_ISL_1904464, EPI_ISL_1904465, EPI_ISL_1904466, EPI_ISL_1904468, EPI_ISL_1904469, EPI_ISL_1904470, EPI_ISL_2405115, EPI_ISL_2462422, EPI_ISL_2462430, EPI_ISL_2462432                                                                                                                                                                                                                                                                                      |                                                                                                     |                                                                                                                      |                                                                                                                                                                                                                                                                                                                                                                                                                                                                                                                                                                                                                                                                                                                                                                                                                                   |
| see above                                                                                                                                                                                                                                                                                                                                                                                                                                                                                                                                                                                                                                                                                                                                                                   | South Eastern Area Laboratory Services (SEALS)                                                      | NSW Health Pathology - Institute of Clinical Pathology and Medical Research; Westmead Hospital; University of Sydney | CIDM-PH et al.                                                                                                                                                                                                                                                                                                                                                                                                                                                                                                                                                                                                                                                                                                                                                                                                                    |
| EPI_ISL_526200                                                                                                                                                                                                                                                                                                                                                                                                                                                                                                                                                                                                                                                                                                                                                              | St Vincent's Pathology (SydPath)                                                                    | NSW Health Pathology - Institute of Clinical Pathology and Medical Research; Westmead Hospital; University of Sydney | CIDM-PH et al.                                                                                                                                                                                                                                                                                                                                                                                                                                                                                                                                                                                                                                                                                                                                                                                                                    |
| EPI_ISL_1731752, EPI_ISL_1731753, EPI_ISL_1731754, EPI_ISL_1731755, EPI_ISL_1914584, EPI_ISL_1914588, EPI_ISL_1914591, EPI_ISL_1914592, EPI_ISL_1914593, EPI_ISL_1914594, EPI_ISL_1914595, EPI_ISL_1914596, EPI_ISL_1914597, EPI_ISL_1914598, EPI_ISL_1969753, EPI_ISL_2098710, EPI_ISL_2098714, EPI_ISL_2098715, EPI_ISL_2098716, EPI_ISL_2098717, EPI_ISL_2098718, EPI_ISL_2098719, EPI_ISL_2098720, EPI_ISL_2098721, EPI_ISL_2098722, EPI_ISL_2307102, EPI_ISL_2307104, EPI_ISL_2307105, EPI_ISL_2307107, EPI_ISL_2307108, EPI_ISL_2307109, EPI_ISL_2307110, EPI_ISL_2307116, EPI_ISL_2307120, EPI_ISL_2307123, EPI_ISL_2307131, EPI_ISL_2307132, EPI_ISL_2307133, EPI_ISL_2620738, EPI_ISL_2620739, EPI_ISL_2620740, EPI_ISL_2620741, EPI_ISL_2620742                   |                                                                                                     |                                                                                                                      |                                                                                                                                                                                                                                                                                                                                                                                                                                                                                                                                                                                                                                                                                                                                                                                                                                   |
| see above                                                                                                                                                                                                                                                                                                                                                                                                                                                                                                                                                                                                                                                                                                                                                                   | State Virus Research and Diagnostic Laboratory (VRDL), AIIMS Raipur                                 | State Virus Research and Diagnostic Laboratory (VRDL), AIIMS Raipur                                                  | Anudita Bhargava; Jijyan Chandrawanshi; Kuldeep Sharma; MD Rafiqullah Khan; Priyanka Singh; Pushpendra Singh; Sanjay Singh Negi; Somya Sharma                                                                                                                                                                                                                                                                                                                                                                                                                                                                                                                                                                                                                                                                                     |
| EPI_ISL_455072                                                                                                                                                                                                                                                                                                                                                                                                                                                                                                                                                                                                                                                                                                                                                              | Sullivan Nicolaides Pathology                                                                       | NSW Health Pathology - Institute of Clinical Pathology and Medical Research; Westmead Hospital; University of Sydney | CIDM-PH et al.                                                                                                                                                                                                                                                                                                                                                                                                                                                                                                                                                                                                                                                                                                                                                                                                                    |
| EPI_ISL_1969243                                                                                                                                                                                                                                                                                                                                                                                                                                                                                                                                                                                                                                                                                                                                                             | Swissbel Hotel Airport                                                                              | National Institute of Health Research and Development                                                                | Arie Ardiansyah Nugraha; Hana Aparsi Pawestri; Hartanti Dian Ikawati; Kartika Dewi Puspa; Krisna Pangesti; Nelly Puspandari; Subangkit; Triyani Soekarso; Vivi Setiawaty                                                                                                                                                                                                                                                                                                                                                                                                                                                                                                                                                                                                                                                          |
| EPI_ISL_526157, EPI_ISL_526160                                                                                                                                                                                                                                                                                                                                                                                                                                                                                                                                                                                                                                                                                                                                              | Sydney South West Pathology Service (SSWPS) - Liverpool Hospital - NSW Health Pathology             | NSW Health Pathology - Institute of Clinical Pathology and Medical Research; Westmead Hospital; University of Sydney | CIDM-PH et al.                                                                                                                                                                                                                                                                                                                                                                                                                                                                                                                                                                                                                                                                                                                                                                                                                    |
| EPI_ISL_845799, EPI_ISL_2405111, EPI_ISL_2405112, EPI_ISL_2462421, EPI_ISL_2462429                                                                                                                                                                                                                                                                                                                                                                                                                                                                                                                                                                                                                                                                                          | Sydney South West Pathology Service (SSWPS) - Royal Prince Alfred Hospital - NSW Health Pathology   | NSW Health Pathology - Institute of Clinical Pathology and Medical Research; Westmead Hospital; University of Sydney | CIDM-PH et al.                                                                                                                                                                                                                                                                                                                                                                                                                                                                                                                                                                                                                                                                                                                                                                                                                    |
| EPI_ISL_1259057, EPI_ISL_1259137, EPI_ISL_1319260, EPI_ISL_1319303, EPI_ISL_1319390, EPI_ISL_2097104, EPI_ISL_2107178, EPI_ISL_2546921, EPI_ISL_2546955, EPI_ISL_2547065                                                                                                                                                                                                                                                                                                                                                                                                                                                                                                                                                                                                    |                                                                                                     |                                                                                                                      |                                                                                                                                                                                                                                                                                                                                                                                                                                                                                                                                                                                                                                                                                                                                                                                                                                   |
| see above                                                                                                                                                                                                                                                                                                                                                                                                                                                                                                                                                                                                                                                                                                                                                                   | Synlab Eesti OÜ                                                                                     | 1. Laboratory of Communicable Diseases (Estonia); 2. Eurofins Genomics Europe Sequencing GmbH                        | Lidia Dotsenko et al.                                                                                                                                                                                                                                                                                                                                                                                                                                                                                                                                                                                                                                                                                                                                                                                                             |
| EPI_ISL_1851555                                                                                                                                                                                                                                                                                                                                                                                                                                                                                                                                                                                                                                                                                                                                                             | Synlab MVZ Augsburg                                                                                 | Robert Koch Institute                                                                                                |                                                                                                                                                                                                                                                                                                                                                                                                                                                                                                                                                                                                                                                                                                                                                                                                                                   |
| EPI_ISL_2450349, EPI_ISL_2450350, EPI_ISL_2450352                                                                                                                                                                                                                                                                                                                                                                                                                                                                                                                                                                                                                                                                                                                           | THE KOLAR MOBILE TEAM                                                                               | INSACOG-KA, NIMHANS                                                                                                  | Ananthapadmanabha Kotambail; Anita S Desai; Anson Kunjumon George; Chetan G K; Chitra Pattabiraman; Darshan Sreenivas; Gautham Arunachal Udupi; V Ravi                                                                                                                                                                                                                                                                                                                                                                                                                                                                                                                                                                                                                                                                            |
| EPI_ISL_1827708                                                                                                                                                                                                                                                                                                                                                                                                                                                                                                                                                                                                                                                                                                                                                             | TLC                                                                                                 | National Institute for Communicable Diseases of the National Health Laboratory Service                               | Amoako DG; Bhiman JN; Ismail A; Mahlangu B; Maphalala GP; Mohale T; Ntuli N; Scheepers C                                                                                                                                                                                                                                                                                                                                                                                                                                                                                                                                                                                                                                                                                                                                          |
| EPI_ISL_2363998, EPI_ISL_2364003, EPI_ISL_2364006                                                                                                                                                                                                                                                                                                                                                                                                                                                                                                                                                                                                                                                                                                                           | TYKS, Kliininen mikrobiologia                                                                       | Expert Microbiology, National Institute for Health and Welfare                                                       | Carita Savolainen-Kopra; Erika Lindh; Haider al-Hello; Jani Halkilahti; Kirsi Liitsola; Niina Ikonen; Pekka Ellonen; Päivi Laurila; Sari Hannula; Soile Blomqvist; Teemu Smura                                                                                                                                                                                                                                                                                                                                                                                                                                                                                                                                                                                                                                                    |
| EPI_ISL_2162143                                                                                                                                                                                                                                                                                                                                                                                                                                                                                                                                                                                                                                                                                                                                                             | Taldykorgan Anti-Plague Station                                                                     | Reference laboratory for the control of viral infections                                                             | Aidar Ussebayev; Aknur Mutaliyeva; Andrey Komissarov; Artem Fadeev; Azamat Kenessov; Bekzhan Maikotov; Gaukhar Nussupbayeva; Madina Tleubergenova; Maria Pisareva; Nazym Tleumbetova                                                                                                                                                                                                                                                                                                                                                                                                                                                                                                                                                                                                                                              |
| EPI_ISL_2341993, EPI_ISL_2341997, EPI_ISL_2342000, EPI_ISL_2342012, EPI_ISL_2342015, EPI_ISL_2342027, EPI_ISL_2342029, EPI_ISL_2342033, EPI_ISL_2342036, EPI_ISL_2342040, EPI_ISL_2342061, EPI_ISL_2342068, EPI_ISL_2342077, EPI_ISL_2342078, EPI_ISL_2342089, EPI_ISL_2342093, EPI_ISL_2342107, EPI_ISL_2342117, EPI_ISL_2342118, EPI_ISL_2342123, EPI_ISL_2342127, EPI_ISL_2342242, EPI_ISL_2342249, EPI_ISL_2342273, EPI_ISL_2342278, EPI_ISL_2342329, EPI_ISL_2342331, EPI_ISL_2342332, EPI_ISL_2342333, EPI_ISL_2342334, EPI_ISL_2342335, EPI_ISL_2342336, EPI_ISL_2342337, EPI_ISL_2342338, EPI_ISL_2342340, EPI_ISL_2342343, EPI_ISL_2342344, EPI_ISL_2342345, EPI_ISL_2342346, EPI_ISL_2342347, EPI_ISL_2342348, EPI_ISL_2342349, EPI_ISL_2342350, EPI_ISL_2342351, |                                                                                                     |                                                                                                                      |                                                                                                                                                                                                                                                                                                                                                                                                                                                                                                                                                                                                                                                                                                                                                                                                                                   |
| EPI_ISL_2342352, EPI_ISL_2342353                                                                                                                                                                                                                                                                                                                                                                                                                                                                                                                                                                                                                                                                                                                                            |                                                                                                     |                                                                                                                      |                                                                                                                                                                                                                                                                                                                                                                                                                                                                                                                                                                                                                                                                                                                                                                                                                                   |
| see above                                                                                                                                                                                                                                                                                                                                                                                                                                                                                                                                                                                                                                                                                                                                                                   | Tata Main Hospital, Jharkhand                                                                       | Institute of Life Sciences - INSACOG                                                                                 | Ajay Parida; Amol M. Kanampalliwar; Arup Ghosh; Atimukta Jha; INSACOG Consortium; Omprakash Shiriwars; Punit Prasad; Rajeeb Swain; Rupesh Dash; Safal Walia; Sana Fatma; Shifu Aggarwal; Sunil K. Raghav                                                                                                                                                                                                                                                                                                                                                                                                                                                                                                                                                                                                                          |
| EPI_ISL_2501033                                                                                                                                                                                                                                                                                                                                                                                                                                                                                                                                                                                                                                                                                                                                                             | Tboung Khnum Rapid Response Team                                                                    | Virology Unit, Institut Pasteur du Cambodge                                                                          | Cecile Troupin; Chau Darapheak; Chin Savuth; Erik A Karlsson; Jurre Y Siegers; Kraing Sidonn; Leakhena Pum; Ly Sovann; Veasna Duong; Yi Sengdoeurm                                                                                                                                                                                                                                                                                                                                                                                                                                                                                                                                                                                                                                                                                |
| EPI_ISL_1591335                                                                                                                                                                                                                                                                                                                                                                                                                                                                                                                                                                                                                                                                                                                                                             | Teaching Institute for Public Health                                                                | Croatian Institute of Public Health                                                                                  | Irena Tabain; Ivana Ferenčak                                                                                                                                                                                                                                                                                                                                                                                                                                                                                                                                                                                                                                                                                                                                                                                                      |
| EPI_ISL_1443584                                                                                                                                                                                                                                                                                                                                                                                                                                                                                                                                                                                                                                                                                                                                                             | Teaching Institute for Public Health of Split-Dalmatia County                                       | Croatian Institute of Public Health                                                                                  | Irena Tabain; Ivana Ferenčak                                                                                                                                                                                                                                                                                                                                                                                                                                                                                                                                                                                                                                                                                                                                                                                                      |
| EPI_ISL_2626555                                                                                                                                                                                                                                                                                                                                                                                                                                                                                                                                                                                                                                                                                                                                                             | Teaching Institute of Public Heath of Split- Dalmatia County                                        | Croatian Institute of Public Health                                                                                  | Irena Tabain; Ivana Ferenčak                                                                                                                                                                                                                                                                                                                                                                                                                                                                                                                                                                                                                                                                                                                                                                                                      |
| EPI_ISL_2484762, EPI_ISL_2484765, EPI_ISL_2611664                                                                                                                                                                                                                                                                                                                                                                                                                                                                                                                                                                                                                                                                                                                           | Temporary Specimen Collection Centre at the AsiaWorld-Expo                                          | Hong Kong Department of Health                                                                                       | Alan K.L. Tsang; Dominic N.C. Tsang; Edman T.K. Lam; Gannon C.K. Mak; Ken H.L. Ng; Peter C.W. Yip; Peter K.C. Cheng; Rickjason C.W. Chan                                                                                                                                                                                                                                                                                                                                                                                                                                                                                                                                                                                                                                                                                          |
| EPI_ISL_2230692, EPI_ISL_2230693, EPI_ISL_2230694, EPI_ISL_2402558, EPI_ISL_2478980, EPI_ISL_2500850                                                                                                                                                                                                                                                                                                                                                                                                                                                                                                                                                                                                                                                                        | The Caribbean Public Health Agency                                                                  | Carrington Lab, Department of PreClinical Sciences, Faculty of Medical Sciences, The University of the West Indies   | Adesh Ramsuhbag; Aisha Andrewin; Anushka Ramjag; Arianne Brown-Jordan; Avery Hinds; Ayoola Oyinloye; Chinna Chinnadurai; Christine V. F. Carrington; Christopher Oura; Gabriel Escobar; Jaya Jayaraman; Jerome Foster; Karla Georges; Marsha Ivey; Naresh Nandram; Narine Singh; Nikita S. D. Sahadeo; Nuno Faria; Oliver Pybus; Rahul Naidu; Rajini Haraksingh; Risha Singh; Sarah Hill; Stanley Giddings; SueMin Nathaniel; Vernie Ramkissoon                                                                                                                                                                                                                                                                                                                                                                                   |
| EPI_ISL_2621679, EPI_ISL_2621680                                                                                                                                                                                                                                                                                                                                                                                                                                                                                                                                                                                                                                                                                                                                            | The Caribbean Public Health Agency                                                                  | Carrington Lab, Department of Preclinical Sciences, Faculty of Medical Sciences, The University of the West Indies   | Anushka Ramjag; Arianne Brown-Jordan; Avery Hinds; Christine V. F. Carrington; Christopher Oura; Gabriel Escobar; Karla Georges; Kenneth George; Nikita S. D. Sahadeo; Nuno Faria; Oliver Pybus; Risha Singh; Sarah Hill; SueMin Nathaniel; Vernie Ramkissoon                                                                                                                                                                                                                                                                                                                                                                                                                                                                                                                                                                     |
| EPI_ISL_1837991, EPI_ISL_1838012, EPI_ISL_1838023, EPI_ISL_1838042, EPI_ISL_1838045, EPI_ISL_1838063, EPI_ISL_1838073, EPI_ISL_1838080, EPI_ISL_1838083, EPI_ISL_1838086, EPI_ISL_1838109, EPI_ISL_1838114, EPI_ISL_1838123, EPI_ISL_1838125, EPI_ISL_1838134, EPI_ISL_1838151, EPI_ISL_1838194, EPI_ISL_1838217, EPI_ISL_1838225, EPI_ISL_1838229, EPI_ISL_1838260, EPI_ISL_1838262, EPI_ISL_1838265, EPI_ISL_1838282, EPI_ISL_1838285, EPI_ISL_1838292, EPI_ISL_1838312, EPI_ISL_1838315, EPI_ISL_1838322, EPI_ISL_1838327, EPI_ISL_1838337, EPI_ISL_1972350                                                                                                                                                                                                              |                                                                                                     |                                                                                                                      |                                                                                                                                                                                                                                                                                                                                                                                                                                                                                                                                                                                                                                                                                                                                                                                                                                   |
| see above                                                                                                                                                                                                                                                                                                                                                                                                                                                                                                                                                                                                                                                                                                                                                                   | The National Centre for Cell Science                                                                | CSIR-Centre for Cellular and Molecular Biology-INSACOG                                                               | Ajay Pillai; Amreshwar Vodapalli; Ara Sreenivas; Archana Bharadwaj Siva; B Himasri; Blessy B John; Dhiraj Paul; Divya Tej Sowpatti; INSACOG Consortium team; Karthik Bharadwaj Tallapaka; Lamuk Zaveri; Manoj Kumar Bhat; Mitali Inamdar; Mohak P Gajare; Onkar Kulkarni; Payel Mukherjee; Rakesh K Mishra; Sharath Chandra Thota; Shivang P. Bhanushali; Shreekant Verma; Sofia Banu; Sonal Manik Chavan; Tulasi Nagabandi; Valli Nagalakshmi Undamatia; Viswagithe S L; Yogesh Shouche                                                                                                                                                                                                                                                                                                                                          |
| EPI_ISL_584075, EPI_ISL_792695                                                                                                                                                                                                                                                                                                                                                                                                                                                                                                                                                                                                                                                                                                                                              | The National Institute of Public Health                                                             | State Veterinary Institute Prague                                                                                    | A; D; H; J; Jirincova; L; Nagy; Novakova; Trnka; Vecerova                                                                                                                                                                                                                                                                                                                                                                                                                                                                                                                                                                                                                                                                                                                                                                         |
| EPI_ISL_827293, EPI_ISL_827880, EPI_ISL_830102, EPI_ISL_1586693                                                                                                                                                                                                                                                                                                                                                                                                                                                                                                                                                                                                                                                                                                             | The National University Hospital of Iceland                                                         | deCODE genetics                                                                                                      | Agnar Helgason; Alma Moller; Arna B Agustsdottir; Arnaldur Gylfason; Asgeir Sigurdsson; Aslaug Jonasdottir; Berglind Eiriksdottir; Bjarni Thorbjornsson; Brynjar O Jensson; Daniel F Gudbjartsson; Droplaug N Magnusdottir; Elisabet E Gardarsdottir; Emil A Thorarensen; Gardar Sveinbjornsson; Gisi Masson; Gudmundur Georgsson; Gudmundur L Norddahl; Gudrun Sigmundsdottir; Hakon Jonsson; Hannes Eggertsson; Hilma Holm; Ingileif Jonsdottir; Jona Saemundsdottir; Kamilla S Josefsdottir; Kari Stefansson; Karl G Kristinnsson; Kjartan R Gudmundsson; Kristin E Sveinsdottir; Louise le Roux; Maney Sveinsdottir; Olafia S Gretarsdottir; Olafur T Magnusson; Pall Melsted; Patrick Sulem; Run Fridriksdottir; Solvi Rognvaldsson; Thora R Gunnarsdottir; Thorodd Kristjansson; Thorolfur Gudnason; Unnur Thorsteinsdottir |
| EPI_ISL_754232                                                                                                                                                                                                                                                                                                                                                                                                                                                                                                                                                                                                                                                                                                                                                              | The Republican Research and Practical Center for Epidemiology and Microbiology (RRPCEM)             | WHO National Influenza Centre Russian Federation                                                                     | Anatoly Krasko; Andrey Komissarov; Anna Ivanova; Artem Fadeev; Daria Danilenko; Dmitry Bazhenov; Dmitry Lioznov; Elena Gasich; Elena Nabieva; Georgii Bazkyin; Kirill Bulda; Ksenia Safina; Kseniya Komissarova                                                                                                                                                                                                                                                                                                                                                                                                                                                                                                                                                                                                                   |
| EPI_ISL_2033745, EPI_ISL_2350787, EPI_ISL_2350789, EPI_ISL_2350790                                                                                                                                                                                                                                                                                                                                                                                                                                                                                                                                                                                                                                                                                                          | Translational Health Science and Technology Institute -ESIC medical college and hospital, Faridabad | THSTI Bioassay laboratory                                                                                            | Akshay Kanakan; Anil Pandey; Guruprasad R Medigeshi; Heena Shaman; Janani Srinivasa Vasudevan; Janmejay Singh; Jigme Wangchuk; Kamal Pargai; Naseem Ahmed Khan; Neha Jha; Priyanka Mehta; Rajesh Pandey; Ranjeet Maurya                                                                                                                                                                                                                                                                                                                                                                                                                                                                                                                                                                                                           |
| EPI_ISL_2497530, EPI_ISL_2625900                                                                                                                                                                                                                                                                                                                                                                                                                                                                                                                                                                                                                                                                                                                                            | UAB "Rezus.lt"                                                                                      | Institute of Biotechnology, Life Sciences Center, Vilnius University                                                 | Albertas Timinskas; Alma Gedvilaite; Danguole Ziogiene; Emilija Vasiliunaite; Emilija Vasiliunaite__ Milda Norkiene__ Danguole Ziogiene__ Albertas Timinskas__ Alma Gedvilaite; Milda Norkiene                                                                                                                                                                                                                                                                                                                                                                                                                                                                                                                                                                                                                                    |
| EPI_ISL_2625896, EPI_ISL_2625909, EPI_ISL_2625921                                                                                                                                                                                                                                                                                                                                                                                                                                                                                                                                                                                                                                                                                                                           | UAB Medicina practica laboratorija                                                                  | Institute of Biotechnology, Life Sciences Center, Vilnius University                                                 | Emilija Vasiliunaite__ Milda Norkiene__ Danguole Ziogiene__ Albertas Timinskas__ Alma Gedvilaite                                                                                                                                                                                                                                                                                                                                                                                                                                                                                                                                                                                                                                                                                                                                  |
| EPI_ISL_648124                                                                                                                                                                                                                                                                                                                                                                                                                                                                                                                                                                                                                                                                                                                                                              | UHAS COVID-19 Lab                                                                                   | UHAS COVID-19 Lab                                                                                                    | John O. Gyapong and the UHAS COVID-19 Lab Team; Jones Gyamfi; Kwabena O. Duedu; Reuben Ayivor-Djanie                                                                                                                                                                                                                                                                                                                                                                                                                                                                                                                                                                                                                                                                                                                              |
| EPI_ISL_2376292, EPI_ISL_2376294                                                                                                                                                                                                                                                                                                                                                                                                                                                                                                                                                                                                                                                                                                                                            | ULSS 2 Marca Trevigiana                                                                             | Istituto Zooprofilattico Sperimentale delle Venezie                                                                  | Adelaide Milani; Alessia Schivo; Alice Fusaro; Ambra Pastori; Annalisa Salviato; Antonia Ricci; Calogero Terregino; Edoardo Giussani; Elisa Palumbo; Erika Giorgia Quaranta; Isabella Monne; Luca Tassoni                                                                                                                                                                                                                                                                                                                                                                                                                                                                                                                                                                                                                         |
| EPI_ISL_2376289, EPI_ISL_2376290, EPI_ISL_2376291, EPI_ISL_2376379, EPI_ISL_2376380, EPI_ISL_2392108                                                                                                                                                                                                                                                                                                                                                                                                                                                                                                                                                                                                                                                                        | ULSS 3 Venezia                                                                                      | Istituto Zooprofilattico Sperimentale delle Venezie                                                                  | Adelaide Milani; Alessia Schivo; Alice Fusaro; Ambra Pastori; Annalisa Salviato; Antonia Ricci; Calogero Terregino; Edoardo Giussani; Elisa Palumbo; Erika Giorgia Quaranta; Isabella Monne; Luca Tassoni                                                                                                                                                                                                                                                                                                                                                                                                                                                                                                                                                                                                                         |
| EPI_ISL_2376285, EPI_ISL_2376288                                                                                                                                                                                                                                                                                                                                                                                                                                                                                                                                                                                                                                                                                                                                            | ULSS 4 Veneto Orientale                                                                             | Istituto Zooprofilattico Sperimentale delle Venezie                                                                  | Adelaide Milani; Alessia Schivo; Alice Fusaro; Ambra Pastori; Annalisa Salviato; Antonia Ricci; Calogero Terregino; Edoardo Giussani; Elisa Palumbo; Erika Giorgia Quaranta; Isabella Monne; Luca Tassoni                                                                                                                                                                                                                                                                                                                                                                                                                                                                                                                                                                                                                         |
| EPI_ISL_2376296, EPI_ISL_2376297,                                                                                                                                                                                                                                                                                                                                                                                                                                                                                                                                                                                                                                                                                                                                           | ULSS 8 Berica                                                                                       | Istituto Zooprofilattico Sperimentale delle Venezie                                                                  | Adelaide Milani; Alessia Schivo; Alice Fusaro; Ambra Pastori; Annalisa Salviato; Antonia Ricci; Calogero Terregino; Edoardo Giussani; Elisa Palumbo; Erika Giorgia Quaranta; Isabella Monne; Luca Tassoni                                                                                                                                                                                                                                                                                                                                                                                                                                                                                                                                                                                                                         |

|                                                                                                                                                                                                                                                                                                                                                                                                                                                                                                                                                                                                                                                                                       |                                                                                                                                                               |                                                                                                                                                                                        |                                                                                                                                                                                                                                                                                                                                                                                                                                                                                                                                                                                                                                                                                                                                                                                                                                                                                                                                                                                                                                                                                                                                                                                                                                                                                                                                                                                                                                                                                                                                                                                                                     |                                                                                                                                                                                                                                                                                                                                |
|---------------------------------------------------------------------------------------------------------------------------------------------------------------------------------------------------------------------------------------------------------------------------------------------------------------------------------------------------------------------------------------------------------------------------------------------------------------------------------------------------------------------------------------------------------------------------------------------------------------------------------------------------------------------------------------|---------------------------------------------------------------------------------------------------------------------------------------------------------------|----------------------------------------------------------------------------------------------------------------------------------------------------------------------------------------|---------------------------------------------------------------------------------------------------------------------------------------------------------------------------------------------------------------------------------------------------------------------------------------------------------------------------------------------------------------------------------------------------------------------------------------------------------------------------------------------------------------------------------------------------------------------------------------------------------------------------------------------------------------------------------------------------------------------------------------------------------------------------------------------------------------------------------------------------------------------------------------------------------------------------------------------------------------------------------------------------------------------------------------------------------------------------------------------------------------------------------------------------------------------------------------------------------------------------------------------------------------------------------------------------------------------------------------------------------------------------------------------------------------------------------------------------------------------------------------------------------------------------------------------------------------------------------------------------------------------|--------------------------------------------------------------------------------------------------------------------------------------------------------------------------------------------------------------------------------------------------------------------------------------------------------------------------------|
| EPI_ISL_2448428,<br>EPI_ISL_2448429,<br>EPI_ISL_2448430,<br>EPI_ISL_2448618                                                                                                                                                                                                                                                                                                                                                                                                                                                                                                                                                                                                           |                                                                                                                                                               |                                                                                                                                                                                        |                                                                                                                                                                                                                                                                                                                                                                                                                                                                                                                                                                                                                                                                                                                                                                                                                                                                                                                                                                                                                                                                                                                                                                                                                                                                                                                                                                                                                                                                                                                                                                                                                     |                                                                                                                                                                                                                                                                                                                                |
| EPI_ISL_1623614                                                                                                                                                                                                                                                                                                                                                                                                                                                                                                                                                                                                                                                                       | UNIBIO ROMANS GAMBETTA                                                                                                                                        | CNR Virus des Infections Respiratoires - France SUD                                                                                                                                    | Antonin Bal; Bruno Lina; Gregory Destras; Gwendolyne Burfin; Hadrien Regue; Laurence Josset; Martine Valette; Quentin Semanas                                                                                                                                                                                                                                                                                                                                                                                                                                                                                                                                                                                                                                                                                                                                                                                                                                                                                                                                                                                                                                                                                                                                                                                                                                                                                                                                                                                                                                                                                       |                                                                                                                                                                                                                                                                                                                                |
| EPI_ISL_2445463                                                                                                                                                                                                                                                                                                                                                                                                                                                                                                                                                                                                                                                                       | UNIDADE BASICA SAUDE NATAL ABADIO LACERDA                                                                                                                     | Instituto Butantan                                                                                                                                                                     | Antonio Jorge Martins; Claudia Renata dos Santos Barros; David Schlesinger; Debora Botequiu Moretti; Dimas Tadeu Covas; Elaine Cristina Marqueze; Elaine Vieira Santos; Evandra Strazza Rodrigues; Heidge Fukumasu; Jayme Augusto de Souza-Neto; José Salvatore Leister Patané; Luiz Alcantara; Luiz Lehmann Coutinho; Maria Carolina Elias; Maurício Lacerda Nogueira; Rafael dos Santos Bezerra; Raul Machado Neto; Rejane Maria Tommasini Grotto; Ricardo Haddad; Sandra Coccuzzo Sampaio Vesson; Simone Kashima; Svetoslav Naney Slavov; Vincent Louis Viala                                                                                                                                                                                                                                                                                                                                                                                                                                                                                                                                                                                                                                                                                                                                                                                                                                                                                                                                                                                                                                                    |                                                                                                                                                                                                                                                                                                                                |
| EPI_ISL_1820935                                                                                                                                                                                                                                                                                                                                                                                                                                                                                                                                                                                                                                                                       | UNIVERSIDAD DE CARTAGENA                                                                                                                                      | Instituto Nacional de Salud- Dirección de Investigación en Salud Pública                                                                                                               | Carlos Franco-Muñoz; Carmen Osorio; Christian Romero; Diana Malo; Diego A. Álvarez-Díaz; Diego Andrés Prada; Gerardo Santamaría; Hector Alejandro Ruiz-Moreno; Jhonattan Reales-González; Jorge Rivera; Juan Camilo Martínez; Julian Naizaque; Katherine Laiton-Donato; Lisseth Pardo; Magdalena Wiesner; Marcela Mercado-Reyes; Maria T. Herrera-Sepúlveda; Marta Lopez Blanco; Martha Lucia Ospina Martinez; Paola Rojas; Patricia del Portillo; Sergio Gomez; Sheryll Corchuelo; Ángela Alarcon Cruz                                                                                                                                                                                                                                                                                                                                                                                                                                                                                                                                                                                                                                                                                                                                                                                                                                                                                                                                                                                                                                                                                                             |                                                                                                                                                                                                                                                                                                                                |
| EPI_ISL_1820926                                                                                                                                                                                                                                                                                                                                                                                                                                                                                                                                                                                                                                                                       | UNIVERSIDAD DE Magdalena                                                                                                                                      | Instituto Nacional de Salud- Dirección de Investigación en Salud Pública                                                                                                               | Carlos Franco-Muñoz; Carmen Osorio; Christian Romero; Diana Malo; Diego A. Álvarez-Díaz; Diego Andrés Prada; Gerardo Santamaría; Hector Alejandro Ruiz-Moreno; Jhonattan Reales-González; Jorge Rivera; Juan Camilo Martínez; Julian Naizaque; Katherine Laiton-Donato; Lisseth Pardo; Magdalena Wiesner; Marcela Mercado-Reyes; Maria T. Herrera-Sepúlveda; Marta Lopez Blanco; Martha Lucia Ospina Martinez; Paola Rojas; Patricia del Portillo; Sergio Gomez; Sheryll Corchuelo; Ángela Alarcon Cruz                                                                                                                                                                                                                                                                                                                                                                                                                                                                                                                                                                                                                                                                                                                                                                                                                                                                                                                                                                                                                                                                                                             |                                                                                                                                                                                                                                                                                                                                |
| EPI_ISL_1715130                                                                                                                                                                                                                                                                                                                                                                                                                                                                                                                                                                                                                                                                       | UOC laboratorio di analisi Istituto Giannina Gaslini                                                                                                          | TIGEM                                                                                                                                                                                  | Antonio Grimaldi Patrizia Annunziata Francesco Panariello Teresa Giuliano Valentina Bouche Chiara Colantuono Lucio Di Filippo Anna Manfredi Marcello Salvi Andrea Ballabio Davide Cacchiarelli                                                                                                                                                                                                                                                                                                                                                                                                                                                                                                                                                                                                                                                                                                                                                                                                                                                                                                                                                                                                                                                                                                                                                                                                                                                                                                                                                                                                                      |                                                                                                                                                                                                                                                                                                                                |
| EPI_ISL_2450332                                                                                                                                                                                                                                                                                                                                                                                                                                                                                                                                                                                                                                                                       | UPHC GANGONDANAHALLI                                                                                                                                          | INSACOG-KA, NIMHANS                                                                                                                                                                    | Ananthapadmanabha Kotambail; Anita S Desai; Anson Kunjumon George; Chetan G K; Chitra Pattabiraman; Darshan Sreenivas; Gautham Arunachal Udipi; V Ravi                                                                                                                                                                                                                                                                                                                                                                                                                                                                                                                                                                                                                                                                                                                                                                                                                                                                                                                                                                                                                                                                                                                                                                                                                                                                                                                                                                                                                                                              |                                                                                                                                                                                                                                                                                                                                |
| EPI_ISL_1966102                                                                                                                                                                                                                                                                                                                                                                                                                                                                                                                                                                                                                                                                       | USF TRES PONTES                                                                                                                                               | Instituto Butantan / Mendelics                                                                                                                                                         | Antonio Jorge Martins; Bianca Cecchetto Carlos. Mendelics; Bibiana Santos; Claudia Renata dos Santos Barros; Cintia Bittar; David Schlesinger; Hemocentro Ribeirão Preto; Simone Kashima; Debora Botequiu Moretti; Elaine Cristina Marqueze; Elaine Vieira dos Santos; Elisângela Chicaroni Mattos; Erika Freitas; Evandra Strazza Rodrigues; Flavia Allan da Silva da Costa; Flavia Abujarje; Fábio Sossai Posseson; Guilherme Campos; Guilherme Targino Valente; Heidge Fukumasu. USP; Botucatu: Rejane Maria Tommasini Grotto; Helena Lage Ferreira; Instituto Butantan: Dimas Tadeu Covas; Jardelina de Souza Tadao Bernardino; Dimas Tadeu Netto; Jessica Cristina Chagas Lesbon; Jorge A. Petrolí Marchesi; José Salvatore Leister Patané; João Paulo Kitajima; João Pessoa Araújo Jr.; Leila Sabrina Ullmann; Loyze Paola Oliveira de Lima; Luiz Aurelio de Campos Crispin. Centro de Genômica Funcional da ESALQ; Luiz Lehmann Coutinho; Luiz Carlos Junior de Alcantara; Livia Sacchetto; Maísa C. Pereira Parra; Maria Carolina Elias; Marta Giovanetti; Marília Moraes; Maurício Lacerda Nogueira. Prefeitura de Sao Paulo: Melissa Palmieri.; Patricia Akemi Assato; Paula Rahal; Paulo Inacio da Costa; Rafael dos Santos Bezerra; Raquel de Lello Rocha Campos Cassano. NGS Soluções Genômicas: Pilar Drummond Sampaio Corrêa Mariani. FZEA-USP Pirassununga: Mirele Daiana Poleti; Raul Machado Neto; Ricardo Augusto Brassalotti; Ricardo Haddad; Rodrigo Tocantins Calado. FAMERP-SJRP: Cecília Artico Banho; Sandra Coccuzzo Sampaio; Svetoslav Naney Slavov; Vagner Fonseca; Vincent Louis Viala |                                                                                                                                                                                                                                                                                                                                |
| EPI_ISL_1324141,<br>EPI_ISL_1324148                                                                                                                                                                                                                                                                                                                                                                                                                                                                                                                                                                                                                                                   | UW Virology Lab                                                                                                                                               | UW Virology Lab                                                                                                                                                                        | Alexander Greninger; Hong Xie; Keith R Jerome; Lasata Shrestha; Margaret Mills; Meel-Li Huang; Michelle Lin; Noah Baker; Pavitra Roychoudhury; Saraswathi Sathees; Sean Ellis; Shah Mohamed Bakhshah                                                                                                                                                                                                                                                                                                                                                                                                                                                                                                                                                                                                                                                                                                                                                                                                                                                                                                                                                                                                                                                                                                                                                                                                                                                                                                                                                                                                                |                                                                                                                                                                                                                                                                                                                                |
| EPI_ISL_734696,<br>EPI_ISL_734730,<br>EPI_ISL_734769                                                                                                                                                                                                                                                                                                                                                                                                                                                                                                                                                                                                                                  | UZ Leuven, National Reference Laboratory for Coronaviruses, Laboratory Medicine, Leuven, Belgium                                                              | KU Leuven, Rega Institute, Clinical and Epidemiological Virology                                                                                                                       | Bert Vanmechelen; Joan Marti-Carreras; Piet Maes; Tony Wawina-Bokalanga                                                                                                                                                                                                                                                                                                                                                                                                                                                                                                                                                                                                                                                                                                                                                                                                                                                                                                                                                                                                                                                                                                                                                                                                                                                                                                                                                                                                                                                                                                                                             |                                                                                                                                                                                                                                                                                                                                |
| EPI_ISL_1846441                                                                                                                                                                                                                                                                                                                                                                                                                                                                                                                                                                                                                                                                       | Uniklinikum Carl Gustav Carus an der TU Dresden; Institut für Virologie                                                                                       | Robert Koch Institute                                                                                                                                                                  |                                                                                                                                                                                                                                                                                                                                                                                                                                                                                                                                                                                                                                                                                                                                                                                                                                                                                                                                                                                                                                                                                                                                                                                                                                                                                                                                                                                                                                                                                                                                                                                                                     |                                                                                                                                                                                                                                                                                                                                |
| EPI_ISL_1299861,<br>EPI_ISL_1299871,<br>EPI_ISL_1299884                                                                                                                                                                                                                                                                                                                                                                                                                                                                                                                                                                                                                               | Unit of lab surveillance of viral emerging diseases, National Lab of Influenza                                                                                | Respiratory Virus Unit, National Infection Service, Public Health England                                                                                                              | Iris Hasibra; PHE Covid Sequencing Team; Prof Albana Fico; Prof Silvia Bino                                                                                                                                                                                                                                                                                                                                                                                                                                                                                                                                                                                                                                                                                                                                                                                                                                                                                                                                                                                                                                                                                                                                                                                                                                                                                                                                                                                                                                                                                                                                         |                                                                                                                                                                                                                                                                                                                                |
| EPI_ISL_1490709                                                                                                                                                                                                                                                                                                                                                                                                                                                                                                                                                                                                                                                                       | Unity Health Toronto                                                                                                                                          | Ontario Institute for Cancer Research                                                                                                                                                  | Bernard Lam; Felicia Vincelli; Ilinca Lungu; Jared T. Simpson; Jeremy Johns; Karel Boissinot; Larissa M. Matukas; Le Luu; Mark Downing; Paul Krzyzanowski; Philip Zuzarte; Ramzi Fattouh; Richard de Borja; Samira Mubareka; TIBDN; Trina Otterman; Yan Chen                                                                                                                                                                                                                                                                                                                                                                                                                                                                                                                                                                                                                                                                                                                                                                                                                                                                                                                                                                                                                                                                                                                                                                                                                                                                                                                                                        |                                                                                                                                                                                                                                                                                                                                |
| EPI_ISL_523812                                                                                                                                                                                                                                                                                                                                                                                                                                                                                                                                                                                                                                                                        | Universidad Iberoamericana, Instituto de Medicina Tropical & Salud Global                                                                                     | International Centre for Genetic Engineering and Biotechnology (ICGEB) and ARGO Open Lab Platform                                                                                      | Alejandro Vallejo Degaudenzi; Danilo Licastro; Eileen Riego; Leandro Tapia; Robert Paulino-Ramirez; Simeone Dal Monego; Sreejith Rajasekharan and Alessandro Marcello.; Victor Virgilio Calderon                                                                                                                                                                                                                                                                                                                                                                                                                                                                                                                                                                                                                                                                                                                                                                                                                                                                                                                                                                                                                                                                                                                                                                                                                                                                                                                                                                                                                    |                                                                                                                                                                                                                                                                                                                                |
| EPI_ISL_1577026,<br>EPI_ISL_1628474,<br>EPI_ISL_697796                                                                                                                                                                                                                                                                                                                                                                                                                                                                                                                                                                                                                                | Universidad Industrial de Santander (Laboratorio Central de Investigaciones - Clínica Chicamocha).<br>Universidad Regional Amazonica IKIAM                    | Universidad Industrial de Santander.<br>Institute of Microbiology, Universidad San Francisco de Quito                                                                                  | Carlos Barrios-Hernández; Carolina S. Torres-Jiménez; Cristian E. Cadena-Caballero; Diego Rueda-Plata; Erika Lizarazo-Gutiérrez; Francisco Martinez-Perez; Lina M. Vera-Cala.; Lizeth J. Forero-Buitrago<br>Andrea Carrera; Belén Prado-Vivar; Bernardo Gutiérrez; Carolina Praño-Bolaños; Fabian Aguilar; Gabriel Trueba; Juan José Guadalupe; Katherine Apunte; Marcela Ortiz; Michelle Grunauer; Monica Becerra-Wong; Nina Espinoza de los Monteros; Patricio Rojas-Silva; Paul Cárdenas; Sonia Sisilema; Sully Márquez; Verónica Barragán; Yeimy Rojas                                                                                                                                                                                                                                                                                                                                                                                                                                                                                                                                                                                                                                                                                                                                                                                                                                                                                                                                                                                                                                                          |                                                                                                                                                                                                                                                                                                                                |
| EPI_ISL_2339864,<br>EPI_ISL_2339865,<br>EPI_ISL_2603125                                                                                                                                                                                                                                                                                                                                                                                                                                                                                                                                                                                                                               | Universidad de Cordoba, Montería, Colombia                                                                                                                    | Centro de Investigaciones en Microbiología y Biotecnología-UR (CIMBIUR), Facultad de Ciencias Naturales, Universidad del Rosario, Bogotá, Colombia                                     | Ader Alemán; Alejandra Garcia; Alfonso Calderón; Andrés Díaz; Bertha Gastelbondo; Camilo Guzmán; Caty Martínez; Evelin Garay; Germán Arrieta; Hector Contreras; Hector Serrano; Jorge Miranda; José Berrocal; Juan David Ramírez; Ketty Galeano; Luz H. Patiño; Maria Auxiliadora Badillo; Marina Muñoz; Nathalia Ballesteros; Ricardo Rivero; Salim Mattar; Sergio Castañeda; Veronica Contreras; Yesica Botero; Yesica Lopez                                                                                                                                                                                                                                                                                                                                                                                                                                                                                                                                                                                                                                                                                                                                                                                                                                                                                                                                                                                                                                                                                                                                                                                      |                                                                                                                                                                                                                                                                                                                                |
| EPI_ISL_1582993                                                                                                                                                                                                                                                                                                                                                                                                                                                                                                                                                                                                                                                                       | Universidad del Atlántico Laboratorio de Investigación en Biología Molecular                                                                                  | Instituto Nacional de Salud- Dirección de Investigación en Salud Pública                                                                                                               | Carlos Franco-Muñoz; Carmen Osorio; Diana Malo; Diego A. Álvarez-Díaz; Diego Andrés Prada; Gerardo Santamaría; Hector Alejandro Ruiz-Moreno; Jhonattan Reales-González; Jorge Rivera; Juan Camilo Martínez; Julian Naizaque; Katherine Laiton-Donato; Lisseth Pardo; Magdalena Wiesner; Marcela Mercado-Reyes; Maria T. Herrera-Sepúlveda; Marta Lopez Blanco; Martha Lucia Ospina Martinez; Paola Rojas; Sergio Gomez; Sheryll Corchuelo; Ángela Alarcon Cruz                                                                                                                                                                                                                                                                                                                                                                                                                                                                                                                                                                                                                                                                                                                                                                                                                                                                                                                                                                                                                                                                                                                                                      |                                                                                                                                                                                                                                                                                                                                |
| EPI_ISL_1730346,<br>EPI_ISL_1832582, EPI_ISL_1832584, EPI_ISL_1832590, EPI_ISL_1832591, EPI_ISL_1832599, EPI_ISL_1832608, EPI_ISL_1832614, EPI_ISL_1832643, EPI_ISL_1832646, EPI_ISL_1975127, EPI_ISL_1975163, EPI_ISL_1975165, EPI_ISL_2517537, EPI_ISL_2517624, EPI_ISL_2517639, EPI_ISL_2517671, EPI_ISL_2517749, EPI_ISL_2622580, EPI_ISL_2622904, EPI_ISL_2705776, EPI_ISL_2705813,                                                                                                                                                                                                                                                                                              | see above                                                                                                                                                     | University College London, Great Ormond Street Hospital for Children NHS Foundation Trust, Imperial College Healthcare NHS Trust                                                       | COVID-19 Genomics UK (COG-UK) Consortium                                                                                                                                                                                                                                                                                                                                                                                                                                                                                                                                                                                                                                                                                                                                                                                                                                                                                                                                                                                                                                                                                                                                                                                                                                                                                                                                                                                                                                                                                                                                                                            | Alison Holmes; Charlotte Williams; Helena Tutill; Jacqueline Findlay; James Price; Judith Breuer; Julianne Brown; Kathryn Harris; Leysa Forrest; Mark Kristiansen; Paola Niola; Paola Resende Silva; Patricia Dyal; Paul Randell; Rachel Williams; Samuel Weeks; Sergi Castellano; Sundano Roy; Tony Brooks; Yasmin Panchbhaya |
| EPI_ISL_1436022<br>EPI_ISL_170548                                                                                                                                                                                                                                                                                                                                                                                                                                                                                                                                                                                                                                                     | University Hospital Centre Split<br>University Hospital Dubrava                                                                                               | Croatian Institute of Public Health<br>Ruder Bošković Institute; Forensic Science Centre Ivan Vučetić; University of Zagreb Faculty of Science                                         | Irena Tabain; Ivana Ferenčak<br>Ana Livun; Antonela Blažeković; Boris Maček; Danilo Licastro; Dunja Glavaš; Fran Borovečki; Foad Cosović; Gordana Maravić Vlahovček; Ivan Šamija; Ivana Čelap; Jasna Kašman; Josipa Skelin; Katarina Marija Tupek; Kristian Vlahoviček; Kristina Gotovac Jereji; Lidija Cvetko-Krajinović; Lucija Bašić; Lucija Markulin; Maja Kuzman; Marina Korolija; Mario Stefanović; Mirjana Domazet-Lošo; Paula Stanci; Petra Vrabec; Robert Belužić; Rosa Karlić; Sanja Tadinac; Senčica Pejša; Tomislav Domazet-Lošo; Valentina Dumiljan-Combaj; Vjekoslav Tomačić; Vladimir Krajinović; Željka Mačak Šafranko                                                                                                                                                                                                                                                                                                                                                                                                                                                                                                                                                                                                                                                                                                                                                                                                                                                                                                                                                                              |                                                                                                                                                                                                                                                                                                                                |
| EPI_ISL_1832337,<br>EPI_ISL_1832340,<br>EPI_ISL_2125921<br>EPI_ISL_1072985                                                                                                                                                                                                                                                                                                                                                                                                                                                                                                                                                                                                            | University Hospitals Of Leicester NHS Trust and DeepSeq Nottingham                                                                                            | COVID-19 Genomics UK (COG-UK) Consortium                                                                                                                                               | Christopher Holmes; Christopher Moore; Fei Sang; Joeseeph Chappell; Johnny Debebe; Jonathan Ball; Julian Tang; Karlie Fallon; Matthew Carlisle; Matthew Loose; Nadine Holmes; Patrick McClure; Paul Bird; Thomas Helmer; Victoria Wright                                                                                                                                                                                                                                                                                                                                                                                                                                                                                                                                                                                                                                                                                                                                                                                                                                                                                                                                                                                                                                                                                                                                                                                                                                                                                                                                                                            |                                                                                                                                                                                                                                                                                                                                |
| EPI_ISL_1922125<br>EPI_ISL_2365935,<br>EPI_ISL_2365936,<br>EPI_ISL_2365945                                                                                                                                                                                                                                                                                                                                                                                                                                                                                                                                                                                                            | University of Balamand<br>University of Bari Biomedical Sciences and Human Oncology<br>University of Bari Biomedical Sciences and Human Oncology- Policlinico | Microbial Genomics Lab, Lebanese American University, Byblos<br>University of Bari Biomedical Sciences and Human Oncology<br>University of Bari Biomedical Sciences and Human Oncology | Mira El Chaar; Sima Tokajian; Youssef Bassim<br>Accogli M.; Chironna M.; Loconsole D.; Sallustio A.<br>Accogli M.; Chironna M.; Loconsole D.; Sallustio A.                                                                                                                                                                                                                                                                                                                                                                                                                                                                                                                                                                                                                                                                                                                                                                                                                                                                                                                                                                                                                                                                                                                                                                                                                                                                                                                                                                                                                                                          |                                                                                                                                                                                                                                                                                                                                |
| EPI_ISL_1832153,<br>EPI_ISL_1832157,<br>EPI_ISL_1974723                                                                                                                                                                                                                                                                                                                                                                                                                                                                                                                                                                                                                               | University of Birmingham                                                                                                                                      | COVID-19 Genomics UK (COG-UK) Consortium                                                                                                                                               | Alex Richter; Andrew Bosworth; Andrew Bosworth. Queen Elizabeth Hospital; Anna Casey; Andrew D Beggs PHE Heartlands Lab; Husam Osman; Charlotte Poxon; Institute of Microbiology; Joanne Stockton; Josh Quick; Kasun Wanigasooriya; Mike Kidd; Nicholas Loman. University of Birmingham Testing Laboratory; Celina M Whalley; Oliver Pickles; Radoslaw Poplawski; Samuel Nicholls; University of Birmingham; Claire McMurray; Will Rowe                                                                                                                                                                                                                                                                                                                                                                                                                                                                                                                                                                                                                                                                                                                                                                                                                                                                                                                                                                                                                                                                                                                                                                             |                                                                                                                                                                                                                                                                                                                                |
| EPI_ISL_1970752, EPI_ISL_2003297, EPI_ISL_2003438, EPI_ISL_2139737, EPI_ISL_2245238, EPI_ISL_2289002, EPI_ISL_2382845, EPI_ISL_2382848, EPI_ISL_2382863, EPI_ISL_2382870, EPI_ISL_2483940, EPI_ISL_2500000, EPI_ISL_2500006, EPI_ISL_2500007, EPI_ISL_2500011, EPI_ISL_2500013, EPI_ISL_2612839, EPI_ISL_2728649, EPI_ISL_2728650, EPI_ISL_2728652, EPI_ISL_2728653, EPI_ISL_2728654, EPI_ISL_2728657, EPI_ISL_2728658, EPI_ISL_2728659, EPI_ISL_2728660, EPI_ISL_2728661, EPI_ISL_2728662, EPI_ISL_2728663, EPI_ISL_2728664, EPI_ISL_2728665, EPI_ISL_2728667, EPI_ISL_2728668, EPI_ISL_2728670, EPI_ISL_2728674, EPI_ISL_2728675, EPI_ISL_2728676, EPI_ISL_2728679, EPI_ISL_2728680 | see above                                                                                                                                                     | University of Liège COVID-19 testing center                                                                                                                                            | GIGA Medical Genomics                                                                                                                                                                                                                                                                                                                                                                                                                                                                                                                                                                                                                                                                                                                                                                                                                                                                                                                                                                                                                                                                                                                                                                                                                                                                                                                                                                                                                                                                                                                                                                                               | Bouchra Boujemla; Claire Gourzonés; Cécile Meex; Fabrice Bureau; Keith Durkin; Laurent Gillet; Maria Artes; Marie-Pierre Hayette; Nadine Cambisano; Nathalie Renotte; Olivier Ek; Pierrette Melin; Raphaël Boreux; Sébastien Bontems; Vincent Bours; Wouter Coppiepers                                                         |
| EPI_ISL_955144,<br>EPI_ISL_955151,<br>EPI_ISL_1016508,<br>EPI_ISL_1016969                                                                                                                                                                                                                                                                                                                                                                                                                                                                                                                                                                                                             | University of Sarajevo, Veterinary Faculty, Laboratory for Molecular Diagnostic and Research Laboratory                                                       | University of Sarajevo, Veterinary Faculty, Laboratory for Molecular Diagnostic and Research Laboratory                                                                                | Alic-Seho A.; Alic-Seho A.; Alic-Seho A.; Goletic S.; Goletic T.; Goletic S.; Goletić T.; Goletić Š.; Hodžić A.; Hodžić A.; Hodžić A.; Jazic A.; Jažić A.; Jažić A.; Nivicic M.; Nivicic M.; Sabic E.; Softic A.; Softić A.; Terzić I.; Terzić I.; Jažić A.; Sabic E.; Sabić E.                                                                                                                                                                                                                                                                                                                                                                                                                                                                                                                                                                                                                                                                                                                                                                                                                                                                                                                                                                                                                                                                                                                                                                                                                                                                                                                                     |                                                                                                                                                                                                                                                                                                                                |
| EPI_ISL_2315667,<br>EPI_ISL_2390189<br>EPI_ISL_1355643                                                                                                                                                                                                                                                                                                                                                                                                                                                                                                                                                                                                                                | Universitätsklinikum Bonn - Institut für Virologie                                                                                                            | Robert Koch Institute                                                                                                                                                                  |                                                                                                                                                                                                                                                                                                                                                                                                                                                                                                                                                                                                                                                                                                                                                                                                                                                                                                                                                                                                                                                                                                                                                                                                                                                                                                                                                                                                                                                                                                                                                                                                                     |                                                                                                                                                                                                                                                                                                                                |
| EPI_ISL_2020930<br>EPI_ISL_2020931, EPI_ISL_2020932, EPI_ISL_2020933, EPI_ISL_2020934, EPI_ISL_2020935, EPI_ISL_2020936, EPI_ISL_2020937, EPI_ISL_2020938, EPI_ISL_2020939, EPI_ISL_2020940, EPI_ISL_2020941, EPI_ISL_2020942, EPI_ISL_2020943, EPI_ISL_2020944, EPI_ISL_2020945, EPI_ISL_2020946, EPI_ISL_2020947, EPI_ISL_2020948, EPI_ISL_2020949, EPI_ISL_2020950, EPI_ISL_2020951, EPI_ISL_2020952, EPI_ISL_2020953, EPI_ISL_2020954, EPI_ISL_2020955, EPI_ISL_2020956, EPI_ISL_2020957, EPI_ISL_2020958, EPI_ISL_2020959, EPI_ISL_2020960                                                                                                                                       | see above                                                                                                                                                     | Urban Public Health Centre (UPHC), SECTOR-2, Gandhinagar                                                                                                                               | Gujarat Biotechnology Research Centre                                                                                                                                                                                                                                                                                                                                                                                                                                                                                                                                                                                                                                                                                                                                                                                                                                                                                                                                                                                                                                                                                                                                                                                                                                                                                                                                                                                                                                                                                                                                                                               | Amit Kanani; Amrutral Patel; Bhargav Waghela; Bhumika Prajapati; Chaitanya Joshi; Dinesh Kumar; Janvi Raval; Kalpesh Goswami; Madhvi Joshi; Nilen Patel; Nitesh Shah; Nitin Savaliya; Ramesh Pandit; Sonal Sharma; Tejendra Purohit; Twinkle Soni; Umang Mishra; Zarna Patel; Zuber Saiyed                                     |
| EPI_ISL_2017748<br>EPI_ISL_2001187, EPI_ISL_2001188, EPI_ISL_2001189, EPI_ISL_2001190, EPI_ISL_2001191, EPI_ISL_2001192, EPI_ISL_2001193, EPI_ISL_2001194, EPI_ISL_2001195, EPI_ISL_2001196, EPI_ISL_2001201, EPI_ISL_2001203, EPI_ISL_2001211, EPI_ISL_2001212, EPI_ISL_2017728, EPI_ISL_2017731, EPI_ISL_2017734, EPI_ISL_2017735, EPI_ISL_2017737, EPI_ISL_2017738, EPI_ISL_2017740, EPI_ISL_2017744, EPI_ISL_2017763, EPI_ISL_2017764                                                                                                                                                                                                                                             | VRDL, Government Medical College (GMC) and Hospital, Valsad                                                                                                   | Gujarat Biotechnology Research Centre                                                                                                                                                  | Chaitanya Joshi; Dinesh Kumar; Janvi Raval; Madhvi Joshi; Nitesh Shah; Nitin Savaliya; Ramesh Pandit; Sonal Sharma; Twinkle Soni; Umang Mishra; Vicky Gandhi; Zarna Patel; Zuber Saiyed                                                                                                                                                                                                                                                                                                                                                                                                                                                                                                                                                                                                                                                                                                                                                                                                                                                                                                                                                                                                                                                                                                                                                                                                                                                                                                                                                                                                                             |                                                                                                                                                                                                                                                                                                                                |
| see above                                                                                                                                                                                                                                                                                                                                                                                                                                                                                                                                                                                                                                                                             | VRDL, Government Medical College (GMC), Surat                                                                                                                 | Gujarat Biotechnology Research Centre                                                                                                                                                  | Chaitanya Joshi; Dinesh Kumar; Janvi Raval; Madhvi Joshi; Neeta Khandelwal; Nitesh Shah; Nitin Savaliya; Ramesh Pandit; Sonal Sharma; Twinkle Soni; Umang Mishra; Zarna Patel; Zuber Saiyed                                                                                                                                                                                                                                                                                                                                                                                                                                                                                                                                                                                                                                                                                                                                                                                                                                                                                                                                                                                                                                                                                                                                                                                                                                                                                                                                                                                                                         |                                                                                                                                                                                                                                                                                                                                |
| EPI_ISL_1662284,<br>EPI_ISL_1663498,<br>EPI_ISL_1663501,<br>EPI_ISL_1663502,<br>EPI_ISL_2341666                                                                                                                                                                                                                                                                                                                                                                                                                                                                                                                                                                                       | Veer Surendra Sai Institute of Medical Sciences and Research, Buria, Sambalpur                                                                                | Institute of Life Sciences - INSACOG                                                                                                                                                   | Ajay Parida; Amol M. Kanampalliwar; Arup Ghosh; Atimukta Jha; INSACOG Consortium; Omprakash Shiriwas; Punit Prasad; Rajeeb Swain; Rupesh Dash; Safal Wallia; Sana Fatma; Shifu Aggarwal; Sunil K. Raghav                                                                                                                                                                                                                                                                                                                                                                                                                                                                                                                                                                                                                                                                                                                                                                                                                                                                                                                                                                                                                                                                                                                                                                                                                                                                                                                                                                                                            |                                                                                                                                                                                                                                                                                                                                |
| EPI_ISL_426639,<br>EPI_ISL_436113,<br>EPI_ISL_456438,<br>EPI_ISL_456510,                                                                                                                                                                                                                                                                                                                                                                                                                                                                                                                                                                                                              | Victorian Infectious Diseases Reference Laboratory (VIDRL)                                                                                                    | Microbiological Diagnostic Unit Public Health Laboratory and Victorian Infectious Diseases Reference Laboratory, Doherty Institute                                                     | Caly L.; Druce J.; Sait, M.; Schultz M.; Seemann T.; Sherry, N.                                                                                                                                                                                                                                                                                                                                                                                                                                                                                                                                                                                                                                                                                                                                                                                                                                                                                                                                                                                                                                                                                                                                                                                                                                                                                                                                                                                                                                                                                                                                                     |                                                                                                                                                                                                                                                                                                                                |



|                                                                                                                                                                                                                                                                                                                                                                                |                                                                                                           |                                                                                                                                                                                  |                                                                                                                                                                                                                                                                                                                                                                                                                                                                                                                                                                                                                                                                                                                                                                                                                                 |                                                                                                                                                                                                                                                                                                                                                                                                                                                                                                                                                                                                                   |
|--------------------------------------------------------------------------------------------------------------------------------------------------------------------------------------------------------------------------------------------------------------------------------------------------------------------------------------------------------------------------------|-----------------------------------------------------------------------------------------------------------|----------------------------------------------------------------------------------------------------------------------------------------------------------------------------------|---------------------------------------------------------------------------------------------------------------------------------------------------------------------------------------------------------------------------------------------------------------------------------------------------------------------------------------------------------------------------------------------------------------------------------------------------------------------------------------------------------------------------------------------------------------------------------------------------------------------------------------------------------------------------------------------------------------------------------------------------------------------------------------------------------------------------------|-------------------------------------------------------------------------------------------------------------------------------------------------------------------------------------------------------------------------------------------------------------------------------------------------------------------------------------------------------------------------------------------------------------------------------------------------------------------------------------------------------------------------------------------------------------------------------------------------------------------|
| EPI_ISL_456524                                                                                                                                                                                                                                                                                                                                                                 |                                                                                                           |                                                                                                                                                                                  |                                                                                                                                                                                                                                                                                                                                                                                                                                                                                                                                                                                                                                                                                                                                                                                                                                 |                                                                                                                                                                                                                                                                                                                                                                                                                                                                                                                                                                                                                   |
| EPI_ISL_430695                                                                                                                                                                                                                                                                                                                                                                 | Victorian Infectious Diseases Reference Laboratory (VIDRL)                                                | Microbiological Diagnostic Unit Public Health Laboratory and Victorian Infectious Diseases Reference Laboratory, The Peter Doherty Institute for Infection and Immunity          | Caly L.; Druce J.; Sait, M.; Schultz M.; Seemann T.; Sherry, N.                                                                                                                                                                                                                                                                                                                                                                                                                                                                                                                                                                                                                                                                                                                                                                 |                                                                                                                                                                                                                                                                                                                                                                                                                                                                                                                                                                                                                   |
| EPI_ISL_521478, EPI_ISL_522079, EPI_ISL_522121, EPI_ISL_591894, EPI_ISL_854752, EPI_ISL_933779, EPI_ISL_1249993, EPI_ISL_1249996, EPI_ISL_1913199, EPI_ISL_1913200, EPI_ISL_1913201, EPI_ISL_1913202, EPI_ISL_1913203, EPI_ISL_1913204, EPI_ISL_1913205, EPI_ISL_1913206, EPI_ISL_1913207, EPI_ISL_1913208, EPI_ISL_1913209, EPI_ISL_1913212                                   | see above                                                                                                 | Victorian Infectious Diseases Reference Laboratory (VIDRL)                                                                                                                       | VIDRL and MDU-PHL                                                                                                                                                                                                                                                                                                                                                                                                                                                                                                                                                                                                                                                                                                                                                                                                               | Caly L.; Druce J.; M. B.; M.L.; N.L.; Sait; Sait, M.; Schultz; Schultz M.; Seemann T.; Sherry; Sherry, N.                                                                                                                                                                                                                                                                                                                                                                                                                                                                                                         |
| EPI_ISL_416411, EPI_ISL_416415                                                                                                                                                                                                                                                                                                                                                 | Victorian Infectious Diseases Reference Laboratory (VIDRL)                                                | Victorian Infectious Diseases Reference Laboratory and Microbiological Diagnostic Unit Public Health Laboratory, Doherty Institute                                               |                                                                                                                                                                                                                                                                                                                                                                                                                                                                                                                                                                                                                                                                                                                                                                                                                                 | Caly L.; Druce J.; Schultz M.; Seemann T.; Taiaroa, G.                                                                                                                                                                                                                                                                                                                                                                                                                                                                                                                                                            |
| EPI_ISL_1495574                                                                                                                                                                                                                                                                                                                                                                | Vienna COVID-19 Detection Initiative (VCDI)                                                               | Berghthaler laboratory, CeMM Research Center for Molecular Medicine of the Austrian Academy of Sciences                                                                          | Andreas Berghthaler; Anna Schedl; Bekir Erguner; Benedikt Agerer; Christoph Bock; Fabian Amman; Jan Laine; Lukas Endler; Maelle Le Moing; Martin Senekowitsch; Michael Schuster; Petr Triska; Thomas Penz                                                                                                                                                                                                                                                                                                                                                                                                                                                                                                                                                                                                                       |                                                                                                                                                                                                                                                                                                                                                                                                                                                                                                                                                                                                                   |
| EPI_ISL_2625915                                                                                                                                                                                                                                                                                                                                                                | Viesoji istaiga Klaipėdos universitetinė ligoninė                                                         | Institute of Biotechnology, Life Sciences Center, Vilnius University                                                                                                             | Emilija Vasiliunaite__ Milda Norkiene__ Danguole Ziogiene__ Albertas Timinskas__ Alma Gedvilaite                                                                                                                                                                                                                                                                                                                                                                                                                                                                                                                                                                                                                                                                                                                                |                                                                                                                                                                                                                                                                                                                                                                                                                                                                                                                                                                                                                   |
| EPI_ISL_2427870                                                                                                                                                                                                                                                                                                                                                                | Viesoji istaiga Vilniaus universiteto ligoninė Santaros klinikos                                          | National Public Health Surveillance Laboratory                                                                                                                                   | Ana Steponkienė; Danas Baksa; Jelena Razmuk; Lukas Vasionis; Lukas Zemaits; Migle Gabrielaite; Svajune Muralyte                                                                                                                                                                                                                                                                                                                                                                                                                                                                                                                                                                                                                                                                                                                 |                                                                                                                                                                                                                                                                                                                                                                                                                                                                                                                                                                                                                   |
| EPI_ISL_2342605                                                                                                                                                                                                                                                                                                                                                                | Vikash Multispeciality Hospital, Bargarh                                                                  | Institute of Life Sciences - INSACOG                                                                                                                                             | Ajay Parida; Amol M. Kanampalliwar; Arup Ghosh; Atimukta Jha; INSACOG Consortium; Omprakash Shiriwas; Punit Prasad; Rajeeb Swain; Rupesh Dash; Safal Walla; Sana Fatma; Shifu Aggarwal; Sunil K. Raghav                                                                                                                                                                                                                                                                                                                                                                                                                                                                                                                                                                                                                         |                                                                                                                                                                                                                                                                                                                                                                                                                                                                                                                                                                                                                   |
| EPI_ISL_904945                                                                                                                                                                                                                                                                                                                                                                 | Vilnius University Hospital Santaros Klinikos, Vilnius University                                         | Institute of Biotechnology, Life Sciences Center, Vilnius University                                                                                                             | Albertas Timinskas; Alma Gedvilaite; Aurelija Zvirbliene; Daniel Naumovas; Emilija Vasiliunaite; Laimonas Griskevicius; Milda Norkiene                                                                                                                                                                                                                                                                                                                                                                                                                                                                                                                                                                                                                                                                                          |                                                                                                                                                                                                                                                                                                                                                                                                                                                                                                                                                                                                                   |
| EPI_ISL_933905                                                                                                                                                                                                                                                                                                                                                                 | Vilnius university hospital Santaros Klinikos, Center of Laboratory Medicine                              | Vilnius university hospital Santaros Klinikos, Center of Laboratory Medicine                                                                                                     | Daniel Naumovas; Dovile Ezerskyte; Gytis Dudas; Ingrida Olendraitė; Justinas Siliaks; Rimvydas Norvilas                                                                                                                                                                                                                                                                                                                                                                                                                                                                                                                                                                                                                                                                                                                         |                                                                                                                                                                                                                                                                                                                                                                                                                                                                                                                                                                                                                   |
| EPI_ISL_496499, EPI_ISL_591084, EPI_ISL_591085, EPI_ISL_591086, EPI_ISL_965122, EPI_ISL_965123, EPI_ISL_965124, EPI_ISL_1623756, EPI_ISL_1623757, EPI_ISL_1623758, EPI_ISL_1785567, EPI_ISL_1972306, EPI_ISL_1972309, EPI_ISL_1972314, EPI_ISL_1972326, EPI_ISL_2135837, EPI_ISL_2135838, EPI_ISL_2135839, EPI_ISL_2135840, EPI_ISL_2135841, EPI_ISL_2135842, EPI_ISL_2135843, | see above                                                                                                 | Viral Respiratory Lab, National Institute for Biomedical Research (INRB)                                                                                                         | Pathogen Sequencing Lab, National Institute for Biomedical Research (INRB)                                                                                                                                                                                                                                                                                                                                                                                                                                                                                                                                                                                                                                                                                                                                                      | Allison Black; Amuri Aziza; Andrew Rambaut; Catherine Pratt; Eddy Kinganda-Lusamaki; Edith Nkwembe; Emmanuel Lokilo Lofiko; Francisca Muyembe Mwate; Ian Goodfellow; James Hadfield; Jean Claude Makangara; Jean-Claude Makangara Cigolo; Jean-Jacques Muyembe Tamfum; Josh Quick; Kristian Andersen; Matthias Pauthner; Michael Wiley; Nick Loman; Placide Mbala-Kingebeni; Steve Ahuka-Mundeki; Trevor Bedford                                                                                                                                                                                                  |
| EPI_ISL_435404                                                                                                                                                                                                                                                                                                                                                                 | Virological Research Group, Szentágotthai Research Centre                                                 | Bioinformatics Research Group, Szentágotthai Research Centre                                                                                                                     | Attila Gyenesei; Endre Gábor Tóth; Ferenc Jakab; Gábor Kemenesi; Péter Urbán; Róbert Herczeg                                                                                                                                                                                                                                                                                                                                                                                                                                                                                                                                                                                                                                                                                                                                    |                                                                                                                                                                                                                                                                                                                                                                                                                                                                                                                                                                                                                   |
| EPI_ISL_2115511                                                                                                                                                                                                                                                                                                                                                                | Virologisches Institut des Universitätsklinikums Erlangen                                                 | Robert Koch Institute                                                                                                                                                            |                                                                                                                                                                                                                                                                                                                                                                                                                                                                                                                                                                                                                                                                                                                                                                                                                                 |                                                                                                                                                                                                                                                                                                                                                                                                                                                                                                                                                                                                                   |
| EPI_ISL_1731019, EPI_ISL_1980438, EPI_ISL_2128473, EPI_ISL_2128478, EPI_ISL_2128479, EPI_ISL_2625453, EPI_ISL_2708673, EPI_ISL_2708720, EPI_ISL_2708835                                                                                                                                                                                                                        | see above                                                                                                 | Virology Department, Sheffield Teaching Hospitals NHS Foundation Trust/Department of Infection, Immunity and Cardiovascular Disease, The Medical School, University of Sheffield | COVID-19 Genomics UK (COG-UK) Consortium                                                                                                                                                                                                                                                                                                                                                                                                                                                                                                                                                                                                                                                                                                                                                                                        | Adri Anygal; Alex Keeley; Benjamin Lindsey; Cariad Evans; Danielle Groves; Dave Partridge; Katie Johnson; Laura Carrilero; Luke Green; Matthew Parker; Matthew Wyles; Mehmet Yavuz; Mohammad Raza; Nikki Smith; Paul Parsons; Rachel Tucker; Rebecca Brown; Thushan de Silva                                                                                                                                                                                                                                                                                                                                      |
| EPI_ISL_1793786, EPI_ISL_223377                                                                                                                                                                                                                                                                                                                                                | Virology Laboratory, International Centre for Diarrhoeal Disease Research, Bangladesh (ICDDR,B)           | Virology Laboratory, International Centre for Diarrhoeal Disease Research, Bangladesh (ICDDR,B)                                                                                  | Md. Mahfuzur Rahman; Mohammad Enayet Hossain; Mohammed Ziaur Rahman; Mojinu Miah; Mustafizur Rahman; Rashedul Hasan                                                                                                                                                                                                                                                                                                                                                                                                                                                                                                                                                                                                                                                                                                             |                                                                                                                                                                                                                                                                                                                                                                                                                                                                                                                                                                                                                   |
| EPI_ISL_1855026, EPI_ISL_2081229                                                                                                                                                                                                                                                                                                                                               | Virology Laboratory, Scientific Department, Army Medical Center                                           | Virology Laboratory, Scientific Department, Army Medical Center                                                                                                                  | Anella Monte; Anna Anselmo; Antonella Fortunato; Filippo Molinari; Florigio Lista; Francesco Giordani; Giancarlo Petralito; Giandomenico Cerreto; Giulia Campoli; Lucia Nicosia; Marzia Cavalli; Riccardo De Sanctis; Rossella Brandi; Silvia Fillo; Stella Lia; Vanessa Vera Fain                                                                                                                                                                                                                                                                                                                                                                                                                                                                                                                                              |                                                                                                                                                                                                                                                                                                                                                                                                                                                                                                                                                                                                                   |
| EPI_ISL_1660232, EPI_ISL_1660255, EPI_ISL_1660262, EPI_ISL_1660278, EPI_ISL_1660288, EPI_ISL_1660289, EPI_ISL_1660290, EPI_ISL_1660291, EPI_ISL_1660330, EPI_ISL_1660331                                                                                                                                                                                                       | see above                                                                                                 | Virology Unit, Institut Pasteur de Madagascar                                                                                                                                    | Virology Unit, Institut Pasteur de Madagascar                                                                                                                                                                                                                                                                                                                                                                                                                                                                                                                                                                                                                                                                                                                                                                                   | Angela Brisebarre; Camille Capel; Cara E. Brook; Christian Ranaivoson; Christophe Malabat; Corinne Maufrais; Cristina M. Tato; Emmanuelle Permal; Etienne Simon-Lorière; Frédéric Lemoine; Helisoa Razafimanjato; Jean-Michel Heraud; Joseph L. DeRisi; Louise Lefrançois; Marion Barbet; Maud Vanpeene; Michelle Tan; Méline Bizard; Norosoa Razanajatovo; Philippe Dussart; Soa Fy Andriamandimby; Sylvie Behilli; Sylvie van der Werf; Tsiry Randriambolamanantsoa; Vida Ahyong; Vincent Enouf; Vololoniaina Raharinosy                                                                                        |
| EPI_ISL_1098607, EPI_ISL_1532802, EPI_ISL_1532815, EPI_ISL_1534529, EPI_ISL_1534537, EPI_ISL_1534542, EPI_ISL_1711981, EPI_ISL_1711982, EPI_ISL_1818959, EPI_ISL_1818960, EPI_ISL_1969671, EPI_ISL_2106243, EPI_ISL_2106247, EPI_ISL_2231585, EPI_ISL_2501043, EPI_ISL_2501046, EPI_ISL_2501061, EPI_ISL_2608433                                                               | see above                                                                                                 | Virology Unit, Institut Pasteur du Cambodge                                                                                                                                      | Virology Unit, Institut Pasteur du Cambodge                                                                                                                                                                                                                                                                                                                                                                                                                                                                                                                                                                                                                                                                                                                                                                                     | Cecile Troupin; Chau Darapehak; Chin Savuth; Erik A Karlsson; Jurre Y Siegers; Kraing Sidonn; Leakhena Pum; Ly Sovann; Sokhoun Yann; Teyputita Ou; Veasna Duong; Yi Sengdoeurn                                                                                                                                                                                                                                                                                                                                                                                                                                    |
| EPI_ISL_2447937                                                                                                                                                                                                                                                                                                                                                                | Virology, Universitätsklinikum des Saarlandes                                                             | Epigenetics, Saarland University                                                                                                                                                 | Jörn Walter; Kathrin Kattler; Nastasja Seiwert; Sascha Tierling; Sigrun Smola; Stefan Lohse; Thorsten Pfuhl                                                                                                                                                                                                                                                                                                                                                                                                                                                                                                                                                                                                                                                                                                                     |                                                                                                                                                                                                                                                                                                                                                                                                                                                                                                                                                                                                                   |
| EPI_ISL_2364019, EPI_ISL_2508228                                                                                                                                                                                                                                                                                                                                               | Vita Laboratoriøt Oy                                                                                      | Expert Microbiology, National Institute for Health and Welfare                                                                                                                   | Carita Savolainen-Kopra; Erika Lindh; Haider al-Hello; Jani Halkilahti; Kirsi Liitsola; Niina Ikonen; Olli Vapalahti; Pekka Ellonen; Phuoc Truong; Päivi Laurila; Ravi Kant; Sari Hannula; Soile Blomqvist; Teemu Smura                                                                                                                                                                                                                                                                                                                                                                                                                                                                                                                                                                                                         |                                                                                                                                                                                                                                                                                                                                                                                                                                                                                                                                                                                                                   |
| EPI_ISL_1402358                                                                                                                                                                                                                                                                                                                                                                | Vyskov hospital                                                                                           | CMBG FN Brno                                                                                                                                                                     | Bezdicek M.; Hanslianova M.; Lengerova M.; Svaton J.                                                                                                                                                                                                                                                                                                                                                                                                                                                                                                                                                                                                                                                                                                                                                                            |                                                                                                                                                                                                                                                                                                                                                                                                                                                                                                                                                                                                                   |
| EPI_ISL_2365407, EPI_ISL_2365408, EPI_ISL_2365409, EPI_ISL_2365411, EPI_ISL_2365413                                                                                                                                                                                                                                                                                            | WWF Bayanga field laboratory                                                                              | Robert Koch Institute                                                                                                                                                            | F. H. Leendertz; F. S. Niatou-Singa; M. Ulrich; S. Calvignac-Spencer; T. B. Tombolomako; T. Fuh-Neba; U. Vickos                                                                                                                                                                                                                                                                                                                                                                                                                                                                                                                                                                                                                                                                                                                 |                                                                                                                                                                                                                                                                                                                                                                                                                                                                                                                                                                                                                   |
| EPI_ISL_2365414, EPI_ISL_2365415, EPI_ISL_2365416, EPI_ISL_2365417                                                                                                                                                                                                                                                                                                             | WWF Bayanga field laboratory                                                                              | WWF Bayanga field laboratory                                                                                                                                                     | F. H. Leendertz; F. S. Niatou-Singa; M. Ulrich; S. Calvignac-Spencer; T. B. Tombolomako; T. Fuh-Neba; U. Vickos                                                                                                                                                                                                                                                                                                                                                                                                                                                                                                                                                                                                                                                                                                                 |                                                                                                                                                                                                                                                                                                                                                                                                                                                                                                                                                                                                                   |
| EPI_ISL_2422506, EPI_ISL_2422508, EPI_ISL_2422529, EPI_ISL_2422542, EPI_ISL_2422547, EPI_ISL_2422552, EPI_ISL_2422557, EPI_ISL_2422569                                                                                                                                                                                                                                         | see above                                                                                                 | West African Centre for Cell Biology of Infectious Pathogen, University of Ghana, Legon                                                                                          | WACCBIP, University of Ghana, Volta Road, Legon, Accra                                                                                                                                                                                                                                                                                                                                                                                                                                                                                                                                                                                                                                                                                                                                                                          | Collins M. Morang'a; Dominic S. Y. Amuzu; Dominic S.Y. Amuzu; Edward Danso Fenteng; Emmanuel Kudjo; Evelyn B. Quansah; Evelyn Y Bonney; Frederick Tei-Maya; Ivy A Asante; Joe K. Mutungi; John K. Odoom; Joseph HK Bonney; Joyce M. Ngoi; Lawrence Ofori-Boadu; Lucas N. Amenga-Etego and Gordon A Awandare; Lucas N. Amenga-Etego and Gordon A. Awandare; Mildred Adusei-Poku; Nicaise T. Ndam; Patrick Tetteh Ababio; Peter K Quashie; Peter K. Quashie; Philip M Soglo; Philip M. Soglo; Samirah Saidi; Theophilus Odoom; Vincent Appiah; Violet McCormack; Violette M'cormack; William K. Ampofo; Yaw Bediako |
| EPI_ISL_1255111, EPI_ISL_1255164, EPI_ISL_1255165, EPI_ISL_1255236                                                                                                                                                                                                                                                                                                             | West African Centre for Cell Biology of Infectious Pathogens (WACCBIP), University of Ghana, Accra, Ghana | West African Centre for Cell Biology of Infectious Pathogens (WACCBIP), University of Ghana, Volta Road, Legon-Accra, Ghana                                                      | ; Abdoulaye B Diallo; Abdul-Karim Abass; Aisha Mohammed; Benjamin Demah Nuertey; Collins M. Morang'a; Dam Kenneth Mibut; Dominic S.Y. Amuzu; Emmanuella Amoako4; Evelyn B. Quansah; Frederick Kumi-Ansah; Frederick Tei-Maya; Gordon A Awandare; Joyce M. Ngoi; Kesego Tapela; Lucas N. Amenga-Etego; Nelson Kibinge; Oliver D Boakye5; Peter K Quashie; Philip M. Soglo; Samirah Saidi; Samuel Kaba Akoriyea; Theophilus Odoom; Vanessa Magnussen; Vincent Appiah; Yaw Bediako                                                                                                                                                                                                                                                                                                                                                 |                                                                                                                                                                                                                                                                                                                                                                                                                                                                                                                                                                                                                   |
| EPI_ISL_2601960, EPI_ISL_2601961, EPI_ISL_2646302, EPI_ISL_2675257, EPI_ISL_2675259, EPI_ISL_2681451, EPI_ISL_2681452, EPI_ISL_2727876, EPI_ISL_2774133, EPI_ISL_2774515                                                                                                                                                                                                       | see above                                                                                                 | ZOL                                                                                                                                                                              | Jessa                                                                                                                                                                                                                                                                                                                                                                                                                                                                                                                                                                                                                                                                                                                                                                                                                           | Berden et al. on behalf of Jessa_cmdLab; Berden et al. on behalf of the Jessa_cmdLab; Marijke Raymaekers et al. on behalf of the Jessa_cmdLab; Severine Berden et al. on behalf of the Jessa_cmdLab                                                                                                                                                                                                                                                                                                                                                                                                               |
| EPI_ISL_2693479                                                                                                                                                                                                                                                                                                                                                                | Zavod za javno zdravstvo Medimurske Županije                                                              | Hrvatski zavod za javno zdravstvo                                                                                                                                                | Irena Tabain; Ivana Ferenčak                                                                                                                                                                                                                                                                                                                                                                                                                                                                                                                                                                                                                                                                                                                                                                                                    |                                                                                                                                                                                                                                                                                                                                                                                                                                                                                                                                                                                                                   |
| EPI_ISL_1850498                                                                                                                                                                                                                                                                                                                                                                | amedes MVZ Hannover                                                                                       | Robert Koch Institute                                                                                                                                                            |                                                                                                                                                                                                                                                                                                                                                                                                                                                                                                                                                                                                                                                                                                                                                                                                                                 |                                                                                                                                                                                                                                                                                                                                                                                                                                                                                                                                                                                                                   |
| EPI_ISL_2115877                                                                                                                                                                                                                                                                                                                                                                | amedes MVZ Zentrum für Pathologie und Zytodiagnostik GmbH (KÄrlin)                                        | Robert Koch Institute                                                                                                                                                            |                                                                                                                                                                                                                                                                                                                                                                                                                                                                                                                                                                                                                                                                                                                                                                                                                                 |                                                                                                                                                                                                                                                                                                                                                                                                                                                                                                                                                                                                                   |
| EPI_ISL_2561981, EPI_ISL_2561982, EPI_ISL_2561983, EPI_ISL_2561993, EPI_ISL_2561998, EPI_ISL_2561999, EPI_ISL_2562010, EPI_ISL_2562012                                                                                                                                                                                                                                         | see above                                                                                                 | cerballiance-IDF                                                                                                                                                                 | Cerba lab                                                                                                                                                                                                                                                                                                                                                                                                                                                                                                                                                                                                                                                                                                                                                                                                                       | Aude Lessenne; Bénédicte Roquebert; Emmanuel Lecorche; Kader Merah; Laura Verdume; Patrice Herisson; Sabine Trombert-Paolantoni; Stéphanie Haim-Boukobza; Thierry Collin                                                                                                                                                                                                                                                                                                                                                                                                                                          |
| EPI_ISL_826957, EPI_ISL_827346, EPI_ISL_829334                                                                                                                                                                                                                                                                                                                                 | deCODE genetics                                                                                           | deCODE genetics                                                                                                                                                                  | Agnar Helgason; Alma Moller; Arna B Agustsdottir; Arnaldur Gylfason; Asgeir Sigurdsson; Aslaug Jonasdottir; Berglind Eiríksdóttir; Bjarni Thorbjörnsson; Brynjar O Jensson; Daniel F Gudbjartsson; Droplaug N Magnúsdóttir; Elísabet E Gardarsdóttir; Emil A Thorarensen; Gardar Sveinbjörnsson; Gisli Masson; Gudmundur Georgsson; Gudmundur L Norddahl; Gudrun Sigmundsdóttir; Hakon Jonsson; Hannes Eggertsson; Hilma Holm; Ingileif Jónsdóttir; Jóna Sæmundsdóttir; Kamilla S Jøsefsdóttir; Kari Stefánsson; Karl G Kristinsson; Kjartan R Gudmundsson; Kristín E Sveinsdóttir; Louise le Roux; Maney Sveinsdóttir; Olafía S Gretarsdóttir; Olafur T Magnússon; Páll Melsted; Patrick Sulem; Run Fridriksdóttir; Solvi Rognvaldsson; Thora R Gunnarsdóttir; Thorður Kristjánsson; Thorluff Gudnason; Unnur Thorsteinsdóttir |                                                                                                                                                                                                                                                                                                                                                                                                                                                                                                                                                                                                                   |
| EPI_ISL_2617442                                                                                                                                                                                                                                                                                                                                                                | laboratorio Microbiologia PO Cardarelli                                                                   | laboratorio Microbiologia PO Cardarelli                                                                                                                                          | Felice V.; Niro G. Scutella' M.                                                                                                                                                                                                                                                                                                                                                                                                                                                                                                                                                                                                                                                                                                                                                                                                 |                                                                                                                                                                                                                                                                                                                                                                                                                                                                                                                                                                                                                   |
| EPI_ISL_434569                                                                                                                                                                                                                                                                                                                                                                 | unknown                                                                                                   | Microbiology, The University of Hong Kong                                                                                                                                        | K.-Y.; K.K.W. and Yuen; To                                                                                                                                                                                                                                                                                                                                                                                                                                                                                                                                                                                                                                                                                                                                                                                                      |                                                                                                                                                                                                                                                                                                                                                                                                                                                                                                                                                                                                                   |
| EPI_ISL_1938308                                                                                                                                                                                                                                                                                                                                                                | unknown                                                                                                   | PHV-FSS                                                                                                                                                                          | Son Nguyen                                                                                                                                                                                                                                                                                                                                                                                                                                                                                                                                                                                                                                                                                                                                                                                                                      |                                                                                                                                                                                                                                                                                                                                                                                                                                                                                                                                                                                                                   |

We gratefully acknowledge the following Authors from the Originating laboratories responsible for obtaining the specimens, as well as the Submitting laboratories where the genome data were generated and shared via GISAID, on which this research is based.

All Submitters of data may be contacted directly via [www.gisaid.org](http://www.gisaid.org)

Authors are sorted alphabetically.

| Accession ID                                                                                                                                                                                                                                                                                                                                                                                                                                                                                                                                                                                                                                                                                                                                                                                                                                                                                                                                                                                                                                                                                                                                                                                                                                                                                                                                                                                                                                                                                                                                                                                                                                                                                                                                                                                                                                                                                                                                                                                                                                                                                                                                                                                                                                                                                                                                                                                                                                                                                                                                                                                                                                                                                                                                                                                                                                                                                                                                                                                                                                                                                                                                                                                                                                                                                                                                                                                                                                                                                                                                                                                                                                                                                                                                                                                                                                             | Originating Laboratory                                                                                                                                                                                                                                                                          | Submitting Laboratory                                                                                                                                                                                                                                                                                                                                                                                                               | Authors                                                                                                                                                                                                                                                                                                                                                                                                                                                                                                                                                                                                                                                                                                                                                            |
|----------------------------------------------------------------------------------------------------------------------------------------------------------------------------------------------------------------------------------------------------------------------------------------------------------------------------------------------------------------------------------------------------------------------------------------------------------------------------------------------------------------------------------------------------------------------------------------------------------------------------------------------------------------------------------------------------------------------------------------------------------------------------------------------------------------------------------------------------------------------------------------------------------------------------------------------------------------------------------------------------------------------------------------------------------------------------------------------------------------------------------------------------------------------------------------------------------------------------------------------------------------------------------------------------------------------------------------------------------------------------------------------------------------------------------------------------------------------------------------------------------------------------------------------------------------------------------------------------------------------------------------------------------------------------------------------------------------------------------------------------------------------------------------------------------------------------------------------------------------------------------------------------------------------------------------------------------------------------------------------------------------------------------------------------------------------------------------------------------------------------------------------------------------------------------------------------------------------------------------------------------------------------------------------------------------------------------------------------------------------------------------------------------------------------------------------------------------------------------------------------------------------------------------------------------------------------------------------------------------------------------------------------------------------------------------------------------------------------------------------------------------------------------------------------------------------------------------------------------------------------------------------------------------------------------------------------------------------------------------------------------------------------------------------------------------------------------------------------------------------------------------------------------------------------------------------------------------------------------------------------------------------------------------------------------------------------------------------------------------------------------------------------------------------------------------------------------------------------------------------------------------------------------------------------------------------------------------------------------------------------------------------------------------------------------------------------------------------------------------------------------------------------------------------------------------------------------------------------------|-------------------------------------------------------------------------------------------------------------------------------------------------------------------------------------------------------------------------------------------------------------------------------------------------|-------------------------------------------------------------------------------------------------------------------------------------------------------------------------------------------------------------------------------------------------------------------------------------------------------------------------------------------------------------------------------------------------------------------------------------|--------------------------------------------------------------------------------------------------------------------------------------------------------------------------------------------------------------------------------------------------------------------------------------------------------------------------------------------------------------------------------------------------------------------------------------------------------------------------------------------------------------------------------------------------------------------------------------------------------------------------------------------------------------------------------------------------------------------------------------------------------------------|
| EPI_ISL_2229118                                                                                                                                                                                                                                                                                                                                                                                                                                                                                                                                                                                                                                                                                                                                                                                                                                                                                                                                                                                                                                                                                                                                                                                                                                                                                                                                                                                                                                                                                                                                                                                                                                                                                                                                                                                                                                                                                                                                                                                                                                                                                                                                                                                                                                                                                                                                                                                                                                                                                                                                                                                                                                                                                                                                                                                                                                                                                                                                                                                                                                                                                                                                                                                                                                                                                                                                                                                                                                                                                                                                                                                                                                                                                                                                                                                                                                          | "AR Dept. of Health-PHL, Molecular Diagnostics"                                                                                                                                                                                                                                                 | Centers for Disease Control and Prevention Division of Viral Diseases, Pathogen Discovery                                                                                                                                                                                                                                                                                                                                           | Alison Laufer Halpin; Ben L. Rambo-Martin; Clinton R. Paden; Dakota Howard; Darlene Wagner; Dave Wentworth; Dhwani Batra; Jasmine Padilla; Justin Lee; Katie Dillon; Krista Queen; Kristen Knipe; Kristine Lacey; Mark Burroughs; Matthew Schmerer; Mili Sheth; Peter Cook; Sam Shepard; Sarah Nobles; Shoshona Le; Suxiang Tong; Vivien Dugan; Yvette Unoarumhi                                                                                                                                                                                                                                                                                                                                                                                                   |
| EPI_ISL_1711803                                                                                                                                                                                                                                                                                                                                                                                                                                                                                                                                                                                                                                                                                                                                                                                                                                                                                                                                                                                                                                                                                                                                                                                                                                                                                                                                                                                                                                                                                                                                                                                                                                                                                                                                                                                                                                                                                                                                                                                                                                                                                                                                                                                                                                                                                                                                                                                                                                                                                                                                                                                                                                                                                                                                                                                                                                                                                                                                                                                                                                                                                                                                                                                                                                                                                                                                                                                                                                                                                                                                                                                                                                                                                                                                                                                                                                          | "OK Public Health Laboratory, Oklahoma State DOH"                                                                                                                                                                                                                                               | Centers for Disease Control and Prevention Division of Viral Diseases, Pathogen Discovery                                                                                                                                                                                                                                                                                                                                           | Alison Laufer Halpin; Ben L. Rambo-Martin; Clinton R. Paden; Dakota Howard; Darlene Wagner; Dave Wentworth; Dhwani Batra; Jasmine Padilla; Justin Lee; Katie Dillon; Krista Queen; Kristen Knipe; Kristine Lacey; Mark Burroughs; Matthew Schmerer; Mili Sheth; Peter Cook; Sam Shepard; Sarah Nobles; Shoshona Le; Suxiang Tong; Vivien Dugan; Yvette Unoarumhi                                                                                                                                                                                                                                                                                                                                                                                                   |
| EPI_ISL_763065, EPI_ISL_763067                                                                                                                                                                                                                                                                                                                                                                                                                                                                                                                                                                                                                                                                                                                                                                                                                                                                                                                                                                                                                                                                                                                                                                                                                                                                                                                                                                                                                                                                                                                                                                                                                                                                                                                                                                                                                                                                                                                                                                                                                                                                                                                                                                                                                                                                                                                                                                                                                                                                                                                                                                                                                                                                                                                                                                                                                                                                                                                                                                                                                                                                                                                                                                                                                                                                                                                                                                                                                                                                                                                                                                                                                                                                                                                                                                                                                           | 1-Laboratory of Microbiology, National Reference Lab, Charles Nicolle Hospital; 2-University of Tunis ElManar, Faculty of Medicine of Tunis, LR99E509, Tunis, Tunisia                                                                                                                           | 1-Clinical and Experimental Pharmacology Lab, LR16SP02, National Centre of Pharmacovigilance, University of Tunis El Manar, Tunis, Tunisia. 2-Neurodegenerative diseases and psychiatric troubles, LR18SP03, Razi Hospital, University of Tunis El Manar, Tunis, Tunisia. 3- Ministry of Health, National Observatory of New and Emerging Diseases, 1006, Tunis, Tunisia                                                            | Alia Ben Kahla; Asma Ferjani; Awatef El Moussi; Awatef El Moussi; Gales Emma; Habiba Ben Romdhane; Hanen El Jebbari; Ihlem Boutiba-Ben Boubaker; Ines Mdini; Jalila Ben Khelil; Maher Kharrat; Mouna Ben Sassi; Mouna Safer; Nissaf Ben Alaya; Riadh Dagfous; Riadh Gouider.; Salma Abid; Sameh Trabelsi; Sana Ferjani; Souissi Amira                                                                                                                                                                                                                                                                                                                                                                                                                              |
| EPI_ISL_2532745                                                                                                                                                                                                                                                                                                                                                                                                                                                                                                                                                                                                                                                                                                                                                                                                                                                                                                                                                                                                                                                                                                                                                                                                                                                                                                                                                                                                                                                                                                                                                                                                                                                                                                                                                                                                                                                                                                                                                                                                                                                                                                                                                                                                                                                                                                                                                                                                                                                                                                                                                                                                                                                                                                                                                                                                                                                                                                                                                                                                                                                                                                                                                                                                                                                                                                                                                                                                                                                                                                                                                                                                                                                                                                                                                                                                                                          | 1. Główny Inspektorat Sanitarny, 2. Diagnostyka. Laboratoria Medyczne.                                                                                                                                                                                                                          | 1. ViroGenetics - BSL3 Laboratory of Virology, Malopolska Centre of Biotechnology, Jagiellonian University; 2. genXone SA, Research & Development Laboratory                                                                                                                                                                                                                                                                        | Aleksandra Gidlewicz; Anna Brylak; Gromowski, T.; Grzegorz Nowicki; Jakub Grabowski; Karol Szeszko; Kowalski, M.; Labaj; Maciej Sykulski; Mazur-Panasiuk, N.; Michal Kaszuba; Natalia Drweska-Matelska; P.P.; Pyrc, K.; Sylwia Januszcza; Szulc, P.; Łukasz Krych                                                                                                                                                                                                                                                                                                                                                                                                                                                                                                  |
| EPI_ISL_2144062                                                                                                                                                                                                                                                                                                                                                                                                                                                                                                                                                                                                                                                                                                                                                                                                                                                                                                                                                                                                                                                                                                                                                                                                                                                                                                                                                                                                                                                                                                                                                                                                                                                                                                                                                                                                                                                                                                                                                                                                                                                                                                                                                                                                                                                                                                                                                                                                                                                                                                                                                                                                                                                                                                                                                                                                                                                                                                                                                                                                                                                                                                                                                                                                                                                                                                                                                                                                                                                                                                                                                                                                                                                                                                                                                                                                                                          | 1. Główny Inspektorat Sanitarny, 2. Diagnostyka. Laboratoria Medyczne.                                                                                                                                                                                                                          | 1. ViroGenetics - BSL3 Laboratory of Virology, Malopolska Centre of Biotechnology, Jagiellonian University; 2. genXone SA, Research & Development Laboratory                                                                                                                                                                                                                                                                        | Aleksandra Gidlewicz; Anna Brylak; Gromowski, T.; Grzegorz Nowicki; Jakub Grabowski; Karol Szeszko; Kowalski, M.; Labaj; Maciej Sykulski; Mazur-Panasiuk, N.; Michal Kaszuba; Natalia Drweska-Matelska; P.P.; Pyrc, K.; Sylwia Januszcza; Szulc, P.; Łukasz Krych                                                                                                                                                                                                                                                                                                                                                                                                                                                                                                  |
| EPI_ISL_455448                                                                                                                                                                                                                                                                                                                                                                                                                                                                                                                                                                                                                                                                                                                                                                                                                                                                                                                                                                                                                                                                                                                                                                                                                                                                                                                                                                                                                                                                                                                                                                                                                                                                                                                                                                                                                                                                                                                                                                                                                                                                                                                                                                                                                                                                                                                                                                                                                                                                                                                                                                                                                                                                                                                                                                                                                                                                                                                                                                                                                                                                                                                                                                                                                                                                                                                                                                                                                                                                                                                                                                                                                                                                                                                                                                                                                                           | 1. ViroGenetics - BSL3 Laboratory of Virology, Malopolska Centre of Biotechnology, Jagiellonian University; 2. II Department of Internal Medicine, Faculty of Medicine, Jagiellonian University Medical College; 3. Narodowy Instytut Zdrowia Publicznego - Państwowy Zakład Higieny (NIZP-PZH) | 1. ViroGenetics - BSL3 Laboratory of Virology, Malopolska Centre of Biotechnology, Jagiellonian University; 2. II Department of Internal Medicine, Faculty of Medicine, Jagiellonian University Medical College; 3. Narodowy Instytut Zdrowia Publicznego - Państwowy Zakład Higieny (NIZP-PZH).                                                                                                                                    | Agnieszka Kolakowska-Kulesza; Aleksandra A. Zasada; Aleksandra Milewska; Ewelina Hallman-Szeleńska; Katarzyna Owczarek; Katarzyna Pancer; Katarzyna Zacharczuk; Krzysztof Pyrc; Magdalena Rzczkowska; Marek Sanak; Natalia Wolaniuk; Paweł P Łabaj; Tomasz Wolkowicz; Wojciech Branicki                                                                                                                                                                                                                                                                                                                                                                                                                                                                            |
| EPI_ISL_2383982, EPI_ISL_2383984                                                                                                                                                                                                                                                                                                                                                                                                                                                                                                                                                                                                                                                                                                                                                                                                                                                                                                                                                                                                                                                                                                                                                                                                                                                                                                                                                                                                                                                                                                                                                                                                                                                                                                                                                                                                                                                                                                                                                                                                                                                                                                                                                                                                                                                                                                                                                                                                                                                                                                                                                                                                                                                                                                                                                                                                                                                                                                                                                                                                                                                                                                                                                                                                                                                                                                                                                                                                                                                                                                                                                                                                                                                                                                                                                                                                                         | AL Dept. of Public Health Bureau of Clinical Laboratories                                                                                                                                                                                                                                       | Centers for Disease Control and Prevention Division of Viral Diseases, Pathogen Discovery                                                                                                                                                                                                                                                                                                                                           | Alison Laufer Halpin; Ben L. Rambo-Martin; Clinton R. Paden; Dakota Howard; Darlene Wagner; Dave Wentworth; Dhwani Batra; Jasmine Padilla; Justin Lee; Katie Dillon; Krista Queen; Kristen Knipe; Kristine Lacey; Mark Burroughs; Matthew Schmerer; Mili Sheth; Peter Cook; Sam Shepard; Sarah Nobles; Shoshona Le; Suxiang Tong; Vivien Dugan; Yvette Unoarumhi                                                                                                                                                                                                                                                                                                                                                                                                   |
| EPI_ISL_2097235, EPI_ISL_2098125                                                                                                                                                                                                                                                                                                                                                                                                                                                                                                                                                                                                                                                                                                                                                                                                                                                                                                                                                                                                                                                                                                                                                                                                                                                                                                                                                                                                                                                                                                                                                                                                                                                                                                                                                                                                                                                                                                                                                                                                                                                                                                                                                                                                                                                                                                                                                                                                                                                                                                                                                                                                                                                                                                                                                                                                                                                                                                                                                                                                                                                                                                                                                                                                                                                                                                                                                                                                                                                                                                                                                                                                                                                                                                                                                                                                                         | ALBANY MEDICAL CENTER                                                                                                                                                                                                                                                                           | Wadsworth Center, New York State Department of Health                                                                                                                                                                                                                                                                                                                                                                               | Alexis Russell; Catharine Prussing; Daryl M. Lamson; Erasmus Schneider; Erica Lasek-Nesselquist; John Kelly; Jonathan Pitlnick; Kirsten St. George; Matthew Shudt; Melissa A Leisner; Navjot Singh                                                                                                                                                                                                                                                                                                                                                                                                                                                                                                                                                                 |
| EPI_ISL_2323453                                                                                                                                                                                                                                                                                                                                                                                                                                                                                                                                                                                                                                                                                                                                                                                                                                                                                                                                                                                                                                                                                                                                                                                                                                                                                                                                                                                                                                                                                                                                                                                                                                                                                                                                                                                                                                                                                                                                                                                                                                                                                                                                                                                                                                                                                                                                                                                                                                                                                                                                                                                                                                                                                                                                                                                                                                                                                                                                                                                                                                                                                                                                                                                                                                                                                                                                                                                                                                                                                                                                                                                                                                                                                                                                                                                                                                          | AR Dept. of Health-PHL, Molecular Diagnostics                                                                                                                                                                                                                                                   | Genomics and Discovery, Respiratory Viruses Branch, Division of Viral Diseases, Centers for Disease Control and Prevention                                                                                                                                                                                                                                                                                                          | Adam Retchless; Anna Kelleher; Anna Uehara; Brian Lynch; Clinton R. Paden; Dhwani Batra; Haibin Wang; Han Jia Justin Ng; Jasmine Padilla; Jing Zhang; Justin Lee; Krista Queen; Mark Burroughs; Mili Sheth; Morgan Davis; Peter Cook; Rachel Marine; Sarah Nobles; Suxiang Tong; Tara Coalter; Yan Li; Ying Tao                                                                                                                                                                                                                                                                                                                                                                                                                                                    |
| EPI_ISL_517616, EPI_ISL_517634, EPI_ISL_518804                                                                                                                                                                                                                                                                                                                                                                                                                                                                                                                                                                                                                                                                                                                                                                                                                                                                                                                                                                                                                                                                                                                                                                                                                                                                                                                                                                                                                                                                                                                                                                                                                                                                                                                                                                                                                                                                                                                                                                                                                                                                                                                                                                                                                                                                                                                                                                                                                                                                                                                                                                                                                                                                                                                                                                                                                                                                                                                                                                                                                                                                                                                                                                                                                                                                                                                                                                                                                                                                                                                                                                                                                                                                                                                                                                                                           | Academic Hospital Paramaribo                                                                                                                                                                                                                                                                    | Erasmus Medical Center                                                                                                                                                                                                                                                                                                                                                                                                              | Bas Oude Munnink; Dion Gajadin; Ed Ijzerman; Emmanuelle Munger; Gary Gummels; Ingrid Krishnadhath; Lycke Woittiez; Marion Koopmans; Mireille Van de Veer; Princes Wongsowidjojo; Radjesh Ori; Rohma Banwari; Stephen Vreden                                                                                                                                                                                                                                                                                                                                                                                                                                                                                                                                        |
| EPI_ISL_1445311, EPI_ISL_1445368, EPI_ISL_1550496, EPI_ISL_1560538, EPI_ISL_1562503, EPI_ISL_1563434, EPI_ISL_1650622, EPI_ISL_1650830, EPI_ISL_1667445, EPI_ISL_1685617, EPI_ISL_1685730, EPI_ISL_1686631, EPI_ISL_1687575, EPI_ISL_1688138, EPI_ISL_1688167, EPI_ISL_1689063, EPI_ISL_1690245, EPI_ISL_1690269, EPI_ISL_1701963, EPI_ISL_1701966, EPI_ISL_1735828, EPI_ISL_1736936, EPI_ISL_1737880, EPI_ISL_1834704, EPI_ISL_1835363, EPI_ISL_1835379, EPI_ISL_1836007, EPI_ISL_1836096, EPI_ISL_1836151, EPI_ISL_1923114, EPI_ISL_1925583, EPI_ISL_1995876, EPI_ISL_1997014, EPI_ISL_1997354, EPI_ISL_1997404, EPI_ISL_1997765, EPI_ISL_1997967, EPI_ISL_1998231, EPI_ISL_1998831, EPI_ISL_1999092, EPI_ISL_1999775, EPI_ISL_2000028, EPI_ISL_2000090, EPI_ISL_2000128, EPI_ISL_2000209, EPI_ISL_2000226, EPI_ISL_2000262, EPI_ISL_2000388, EPI_ISL_2038980, EPI_ISL_2038982, EPI_ISL_2038983, EPI_ISL_2039008, EPI_ISL_2039072, EPI_ISL_2039154, EPI_ISL_2039226, EPI_ISL_2039366, EPI_ISL_2039389, EPI_ISL_2039637, EPI_ISL_2039776, EPI_ISL_2039864, EPI_ISL_2039878, EPI_ISL_2040187, EPI_ISL_2040317, EPI_ISL_2040338, EPI_ISL_2040357, EPI_ISL_2040384, EPI_ISL_2040461, EPI_ISL_2040467, EPI_ISL_2040473, EPI_ISL_2040517, EPI_ISL_2040778, EPI_ISL_2040892, EPI_ISL_2040936, EPI_ISL_2040938, EPI_ISL_2040976, EPI_ISL_2041437, EPI_ISL_2041513, EPI_ISL_2041621, EPI_ISL_2041655, EPI_ISL_2041656, EPI_ISL_2041779, EPI_ISL_2041833, EPI_ISL_2041929, EPI_ISL_2041972, EPI_ISL_2042053, EPI_ISL_2042272, EPI_ISL_2042497, EPI_ISL_2042585, EPI_ISL_2042588, EPI_ISL_2042655, EPI_ISL_2042756, EPI_ISL_2042772, EPI_ISL_2042773, EPI_ISL_2042805, EPI_ISL_2042920, EPI_ISL_2042937, EPI_ISL_2042958, EPI_ISL_2043088, EPI_ISL_2043219, EPI_ISL_2043292, EPI_ISL_2043303, EPI_ISL_2043405, EPI_ISL_2043426, EPI_ISL_2043454, EPI_ISL_2043494, EPI_ISL_2089545, EPI_ISL_2089601, EPI_ISL_2089684, EPI_ISL_2089750, EPI_ISL_2089944, EPI_ISL_2090006, EPI_ISL_2090085, EPI_ISL_2090114, EPI_ISL_2090115, EPI_ISL_2090122, EPI_ISL_2090169, EPI_ISL_2090200, EPI_ISL_2090227, EPI_ISL_2090228, EPI_ISL_2090280, EPI_ISL_2090420, EPI_ISL_2090429, EPI_ISL_2145844, EPI_ISL_2145852, EPI_ISL_2145882, EPI_ISL_2146645, EPI_ISL_2148058, EPI_ISL_2148548, EPI_ISL_2148604, EPI_ISL_2148677, EPI_ISL_2149224, EPI_ISL_2149227, EPI_ISL_2149329, EPI_ISL_2149359, EPI_ISL_2149395, EPI_ISL_2149523, EPI_ISL_2149546, EPI_ISL_2149579, EPI_ISL_2149646, EPI_ISL_2149654, EPI_ISL_2149672, EPI_ISL_2149713, EPI_ISL_2149796, EPI_ISL_2149802, EPI_ISL_2149931, EPI_ISL_2150060, EPI_ISL_2150095, EPI_ISL_2150121, EPI_ISL_2150210, EPI_ISL_2150223, EPI_ISL_2150283, EPI_ISL_2150287, EPI_ISL_2150581, EPI_ISL_2150582, EPI_ISL_2150587, EPI_ISL_2150880, EPI_ISL_2159217, EPI_ISL_2159258, EPI_ISL_2159264, EPI_ISL_2181050, EPI_ISL_2181113, EPI_ISL_2181219, EPI_ISL_2181400, EPI_ISL_2186179, EPI_ISL_2187606, EPI_ISL_2201543, EPI_ISL_2201546, EPI_ISL_2201789, EPI_ISL_2202123, EPI_ISL_2203031, EPI_ISL_2203200, EPI_ISL_2203265, EPI_ISL_2203267, EPI_ISL_2204920, EPI_ISL_2241909, EPI_ISL_2242729, EPI_ISL_2243080, EPI_ISL_2243482, EPI_ISL_2243877, EPI_ISL_2244518, EPI_ISL_2244718, EPI_ISL_2268011, EPI_ISL_2280359, EPI_ISL_2280619, EPI_ISL_2280794, EPI_ISL_2283878, EPI_ISL_2370030, EPI_ISL_2370334, EPI_ISL_2372300, EPI_ISL_2421624, EPI_ISL_2421819, EPI_ISL_2421902, EPI_ISL_2421958, EPI_ISL_2489432, EPI_ISL_2527972, EPI_ISL_2527992, EPI_ISL_2528014, EPI_ISL_2528343, EPI_ISL_2528378, EPI_ISL_2528394, EPI_ISL_2528548, EPI_ISL_2528635, EPI_ISL_2528646, EPI_ISL_2528727, EPI_ISL_2528758, EPI_ISL_2528843, EPI_ISL_2528851, EPI_ISL_2528879, EPI_ISL_2528893, EPI_ISL_2600023, EPI_ISL_2600197, EPI_ISL_2686963, EPI_ISL_2687101, EPI_ISL_2687104, EPI_ISL_2687456, EPI_ISL_2784894, EPI_ISL_2784987, EPI_ISL_2785171 | Centers for Disease Control and Prevention Division of Viral Diseases, Pathogen Discovery                                                                                                                                                                                                       | Adrian Paskey; Alec Vest; Benjamin Rambo-Martin; Christopher Gulvick; Clinton R. Paden; Cyndi Clark; Dakota Howard; Darlene Wagner; Dhwani Batra; Dillon Nall; Duncan MacCannell; Ethan Sanders; Holly Houdeshell; Jason Caravas; Kara Moser; Matthew Hardison; Matthew Schmerer; Ola Kvalvaag; Patrick Campbell; Peter W. Cook; Rob Case; Scott Sammons; Shatavia Morrison; Shaun Westlund; Vikramsinha Ghorpade; Yvette Unoarumhi |                                                                                                                                                                                                                                                                                                                                                                                                                                                                                                                                                                                                                                                                                                                                                                    |
| see above                                                                                                                                                                                                                                                                                                                                                                                                                                                                                                                                                                                                                                                                                                                                                                                                                                                                                                                                                                                                                                                                                                                                                                                                                                                                                                                                                                                                                                                                                                                                                                                                                                                                                                                                                                                                                                                                                                                                                                                                                                                                                                                                                                                                                                                                                                                                                                                                                                                                                                                                                                                                                                                                                                                                                                                                                                                                                                                                                                                                                                                                                                                                                                                                                                                                                                                                                                                                                                                                                                                                                                                                                                                                                                                                                                                                                                                | Aegis Sciences Corporation                                                                                                                                                                                                                                                                      |                                                                                                                                                                                                                                                                                                                                                                                                                                     |                                                                                                                                                                                                                                                                                                                                                                                                                                                                                                                                                                                                                                                                                                                                                                    |
| EPI_ISL_2617036, EPI_ISL_2617050, EPI_ISL_2617084, EPI_ISL_2617085                                                                                                                                                                                                                                                                                                                                                                                                                                                                                                                                                                                                                                                                                                                                                                                                                                                                                                                                                                                                                                                                                                                                                                                                                                                                                                                                                                                                                                                                                                                                                                                                                                                                                                                                                                                                                                                                                                                                                                                                                                                                                                                                                                                                                                                                                                                                                                                                                                                                                                                                                                                                                                                                                                                                                                                                                                                                                                                                                                                                                                                                                                                                                                                                                                                                                                                                                                                                                                                                                                                                                                                                                                                                                                                                                                                       | Africa_CDC - Malawi P4 S2                                                                                                                                                                                                                                                                       | CERI, Centre for Epidemic Response and Innovation, Stellenbosch University and KRISP, KZN Research Innovation and Sequencing Platform, UKZN.                                                                                                                                                                                                                                                                                        | Auld A; Chilima B; Chiwaula M; Emmanuel SJ; Giandhari J; Kaba M; Kampira E; Kasambara W; Kim L; Lessells R; Maida A; Mvula B; Mwangomba W; Naidoo Y; Panja L; Pillay S; Tegally H; Wadonda N; Wilkinson E; de Oliveira T                                                                                                                                                                                                                                                                                                                                                                                                                                                                                                                                           |
| EPI_ISL_2617052, EPI_ISL_2617053, EPI_ISL_2617089, EPI_ISL_2617090                                                                                                                                                                                                                                                                                                                                                                                                                                                                                                                                                                                                                                                                                                                                                                                                                                                                                                                                                                                                                                                                                                                                                                                                                                                                                                                                                                                                                                                                                                                                                                                                                                                                                                                                                                                                                                                                                                                                                                                                                                                                                                                                                                                                                                                                                                                                                                                                                                                                                                                                                                                                                                                                                                                                                                                                                                                                                                                                                                                                                                                                                                                                                                                                                                                                                                                                                                                                                                                                                                                                                                                                                                                                                                                                                                                       | Africa_CDC - Malawi P6 S2                                                                                                                                                                                                                                                                       | CERI, Centre for Epidemic Response and Innovation, Stellenbosch University and KRISP, KZN Research Innovation and Sequencing Platform, UKZN.                                                                                                                                                                                                                                                                                        | Auld A; Chilima B; Chiwaula M; Emmanuel SJ; Giandhari J; Kaba M; Kampira E; Kasambara W; Kim L; Lessells R; Maida A; Mvula B; Mwangomba W; Naidoo Y; Panja L; Pillay S; Tegally H; Wadonda N; Wilkinson E; de Oliveira T                                                                                                                                                                                                                                                                                                                                                                                                                                                                                                                                           |
| EPI_ISL_1317489, EPI_ISL_1819941, EPI_ISL_2225843, EPI_ISL_2333510, EPI_ISL_2566163                                                                                                                                                                                                                                                                                                                                                                                                                                                                                                                                                                                                                                                                                                                                                                                                                                                                                                                                                                                                                                                                                                                                                                                                                                                                                                                                                                                                                                                                                                                                                                                                                                                                                                                                                                                                                                                                                                                                                                                                                                                                                                                                                                                                                                                                                                                                                                                                                                                                                                                                                                                                                                                                                                                                                                                                                                                                                                                                                                                                                                                                                                                                                                                                                                                                                                                                                                                                                                                                                                                                                                                                                                                                                                                                                                      | Akershus University Hospital, Department for Microbiology and Infectious Disease Control                                                                                                                                                                                                        | Norwegian Institute of Public Health, Department of Virology                                                                                                                                                                                                                                                                                                                                                                        | *Kathrine Stene-Johansen; Atiya R Ali; Debech Nadia; Engebretsen Serina Beate; Garcia Llorente Ignacio; Hilde Elshaug; Hilde Volian; Jon Bråte; Kamilla Heddeland Instefjord; Karoline Bagstad; Kathrine Stene-Johansen; Line Victoria Moen; Marie Paulsen Madsen; Olav Hungnes; Pedersen Benedikte Nevjen; Rasmus Riis Kopperud                                                                                                                                                                                                                                                                                                                                                                                                                                   |
| EPI_ISL_1575111, EPI_ISL_1653901, EPI_ISL_1701714, EPI_ISL_2008985                                                                                                                                                                                                                                                                                                                                                                                                                                                                                                                                                                                                                                                                                                                                                                                                                                                                                                                                                                                                                                                                                                                                                                                                                                                                                                                                                                                                                                                                                                                                                                                                                                                                                                                                                                                                                                                                                                                                                                                                                                                                                                                                                                                                                                                                                                                                                                                                                                                                                                                                                                                                                                                                                                                                                                                                                                                                                                                                                                                                                                                                                                                                                                                                                                                                                                                                                                                                                                                                                                                                                                                                                                                                                                                                                                                       | Alaska State Virology Laboratory                                                                                                                                                                                                                                                                | Alaska State Virology Laboratory                                                                                                                                                                                                                                                                                                                                                                                                    | Elva House; Jack Chen; Jacob Zidek; Lisa Smith; Ph.D.; Stephanie DeRonde                                                                                                                                                                                                                                                                                                                                                                                                                                                                                                                                                                                                                                                                                           |
| EPI_ISL_1385807, EPI_ISL_1385811                                                                                                                                                                                                                                                                                                                                                                                                                                                                                                                                                                                                                                                                                                                                                                                                                                                                                                                                                                                                                                                                                                                                                                                                                                                                                                                                                                                                                                                                                                                                                                                                                                                                                                                                                                                                                                                                                                                                                                                                                                                                                                                                                                                                                                                                                                                                                                                                                                                                                                                                                                                                                                                                                                                                                                                                                                                                                                                                                                                                                                                                                                                                                                                                                                                                                                                                                                                                                                                                                                                                                                                                                                                                                                                                                                                                                         | Alfa Diagnostica LLC                                                                                                                                                                                                                                                                            | ONCOGENE LLC                                                                                                                                                                                                                                                                                                                                                                                                                        | ONCOGENE LLC                                                                                                                                                                                                                                                                                                                                                                                                                                                                                                                                                                                                                                                                                                                                                       |
| EPI_ISL_1385804, EPI_ISL_1468729                                                                                                                                                                                                                                                                                                                                                                                                                                                                                                                                                                                                                                                                                                                                                                                                                                                                                                                                                                                                                                                                                                                                                                                                                                                                                                                                                                                                                                                                                                                                                                                                                                                                                                                                                                                                                                                                                                                                                                                                                                                                                                                                                                                                                                                                                                                                                                                                                                                                                                                                                                                                                                                                                                                                                                                                                                                                                                                                                                                                                                                                                                                                                                                                                                                                                                                                                                                                                                                                                                                                                                                                                                                                                                                                                                                                                         | Alfa Diagnostica, Republic of Moldova<br>Altius Institute                                                                                                                                                                                                                                       | ONCOGENE LLC<br>Seattle Flu Study                                                                                                                                                                                                                                                                                                                                                                                                   | ONCOGENE LLC                                                                                                                                                                                                                                                                                                                                                                                                                                                                                                                                                                                                                                                                                                                                                       |
| EPI_ISL_2484895, EPI_ISL_2484897, EPI_ISL_2484898, EPI_ISL_2484899                                                                                                                                                                                                                                                                                                                                                                                                                                                                                                                                                                                                                                                                                                                                                                                                                                                                                                                                                                                                                                                                                                                                                                                                                                                                                                                                                                                                                                                                                                                                                                                                                                                                                                                                                                                                                                                                                                                                                                                                                                                                                                                                                                                                                                                                                                                                                                                                                                                                                                                                                                                                                                                                                                                                                                                                                                                                                                                                                                                                                                                                                                                                                                                                                                                                                                                                                                                                                                                                                                                                                                                                                                                                                                                                                                                       | Amdavad Municipal Corporation, Ahmedabad                                                                                                                                                                                                                                                        | Gujarat Biotechnology Research Centre                                                                                                                                                                                                                                                                                                                                                                                               | Alex Nguyen; Amanda Adler; Andrew Meuser; Barry R. Lutz; Benjamin Pelle; Caitlin R. Wolf; Chris D. Frazier; Clem Green; Daniel Bates; Deborah A. Nickerson; Elisabeth Brandstetter; Erica Ryke; Hannah Petersen; Helen Y. Chu; Jacob Rodriguez; Janet A. Englund; Jay Shendure; Jessica Halow; John Stamatoynannopoulos; Joshua Richards; Jover Lee; Julia Wald; Kairsten Fay; Kirsten Lacombe; Kneshay Harper; Lea M. Starita; Mark J. Rieder; Matt Hartman; Matthew Richardson; Matthew Thompson; Melissa Truong; Michael Boeckh; Michael Famulare; Misja Ilcinis; Muhammad Halimun; Olivia Waltner; Peter D. Han; Rebecca Bruders; Ryan Alexander; Sadie Patraw; Sofia Olsson; Stephanie DeBau; Thomas R. Sibley; Tobias Ragoczy; Trevor Bedford; Truong Nguyen |
| EPI_ISL_1994608, EPI_ISL_2178786                                                                                                                                                                                                                                                                                                                                                                                                                                                                                                                                                                                                                                                                                                                                                                                                                                                                                                                                                                                                                                                                                                                                                                                                                                                                                                                                                                                                                                                                                                                                                                                                                                                                                                                                                                                                                                                                                                                                                                                                                                                                                                                                                                                                                                                                                                                                                                                                                                                                                                                                                                                                                                                                                                                                                                                                                                                                                                                                                                                                                                                                                                                                                                                                                                                                                                                                                                                                                                                                                                                                                                                                                                                                                                                                                                                                                         | Ampath - Kingsway<br>Ampath Laboratories                                                                                                                                                                                                                                                        | KRISP, KZN Research Innovation and Sequencing Platform<br>National Institute for Communicable Diseases of the National Health Laboratory Service                                                                                                                                                                                                                                                                                    | Emmanuel SJ; Giandhari J; Khan S; Lessells R; Mdialose K; Naidoo Y; Pillay S; Ramphal U; Tegally H; Wilkinson E; York D; de Oliveira T<br>Amoako DG; Bhiman JN; Glass A; Gottberg A; Mahlangu B; Marshall T; Mohale T; Ntuli N; Scheepers C; Viana R                                                                                                                                                                                                                                                                                                                                                                                                                                                                                                               |
| EPI_ISL_1910791, EPI_ISL_2156780, EPI_ISL_2157307                                                                                                                                                                                                                                                                                                                                                                                                                                                                                                                                                                                                                                                                                                                                                                                                                                                                                                                                                                                                                                                                                                                                                                                                                                                                                                                                                                                                                                                                                                                                                                                                                                                                                                                                                                                                                                                                                                                                                                                                                                                                                                                                                                                                                                                                                                                                                                                                                                                                                                                                                                                                                                                                                                                                                                                                                                                                                                                                                                                                                                                                                                                                                                                                                                                                                                                                                                                                                                                                                                                                                                                                                                                                                                                                                                                                        | Arizona State University<br>Arkansas Children's Hospital                                                                                                                                                                                                                                        | Arizona State University<br>Center for Global Health, University of New Mexico Health Sciences Center                                                                                                                                                                                                                                                                                                                               | Efrem S. Lim; Joshua LaBaer; Joy M. Blain; LaRinda A. Holland; Matthew F. Smith; Nicholas J. Mellor; Peter T. Skidmore; Rabia Maqsood; Valerie Harris; Vel Murugan<br>Bobby Boyanton; Catherine Kirkpatrick; Darrell Dinwiddie; Daryl Domman; Joshua L. Kennedy; Kurt Schwalm; Valerie Morley                                                                                                                                                                                                                                                                                                                                                                                                                                                                      |
| EPI_ISL_2484683, EPI_ISL_2484748, EPI_ISL_2484751                                                                                                                                                                                                                                                                                                                                                                                                                                                                                                                                                                                                                                                                                                                                                                                                                                                                                                                                                                                                                                                                                                                                                                                                                                                                                                                                                                                                                                                                                                                                                                                                                                                                                                                                                                                                                                                                                                                                                                                                                                                                                                                                                                                                                                                                                                                                                                                                                                                                                                                                                                                                                                                                                                                                                                                                                                                                                                                                                                                                                                                                                                                                                                                                                                                                                                                                                                                                                                                                                                                                                                                                                                                                                                                                                                                                        | Arkansas Department of Health                                                                                                                                                                                                                                                                   | Center for Global Health, University of New Mexico Health Sciences Center                                                                                                                                                                                                                                                                                                                                                           | Atul Kothari; Darrell Dinwiddie; Daryl Domman; Joshua L. Kennedy; Kurt Schwalm; Valerie Morley                                                                                                                                                                                                                                                                                                                                                                                                                                                                                                                                                                                                                                                                     |
| EPI_ISL_413490, EPI_ISL_2001099                                                                                                                                                                                                                                                                                                                                                                                                                                                                                                                                                                                                                                                                                                                                                                                                                                                                                                                                                                                                                                                                                                                                                                                                                                                                                                                                                                                                                                                                                                                                                                                                                                                                                                                                                                                                                                                                                                                                                                                                                                                                                                                                                                                                                                                                                                                                                                                                                                                                                                                                                                                                                                                                                                                                                                                                                                                                                                                                                                                                                                                                                                                                                                                                                                                                                                                                                                                                                                                                                                                                                                                                                                                                                                                                                                                                                          | Auckland Hospital<br>BIOSCIENCE, King Faisal Hospital Research Center                                                                                                                                                                                                                           | Institute of Environmental Science and Research (ESR)<br>BIOSCIENCE, King Faisal Hospital Research Center                                                                                                                                                                                                                                                                                                                           | Erasmus Smit; Gary McAuliffe; Joep de Ligt; Lauren Jelly; Matt Storey; Matthew Blakiston; Sally Roberts; Xiaoyun Ren<br>Al-Qahtani A, A.; Alahideh B, M.; Alhamlan F, S.; Almaghrabi R, S.; Alsanea M, S.; Althawadi S, I.; K. and Balavenkatesh Mani, M.; Mutabagani M, S.; UdayaRaja G                                                                                                                                                                                                                                                                                                                                                                                                                                                                           |
| EPI_ISL_859570, EPI_ISL_859604, EPI_ISL_859621, EPI_ISL_859637, EPI_ISL_859724, EPI_ISL_859774, EPI_ISL_860070                                                                                                                                                                                                                                                                                                                                                                                                                                                                                                                                                                                                                                                                                                                                                                                                                                                                                                                                                                                                                                                                                                                                                                                                                                                                                                                                                                                                                                                                                                                                                                                                                                                                                                                                                                                                                                                                                                                                                                                                                                                                                                                                                                                                                                                                                                                                                                                                                                                                                                                                                                                                                                                                                                                                                                                                                                                                                                                                                                                                                                                                                                                                                                                                                                                                                                                                                                                                                                                                                                                                                                                                                                                                                                                                           | BTC, Khalifa University                                                                                                                                                                                                                                                                         | BTC, Khalifa University                                                                                                                                                                                                                                                                                                                                                                                                             | Al Safar et al                                                                                                                                                                                                                                                                                                                                                                                                                                                                                                                                                                                                                                                                                                                                                     |
| see above                                                                                                                                                                                                                                                                                                                                                                                                                                                                                                                                                                                                                                                                                                                                                                                                                                                                                                                                                                                                                                                                                                                                                                                                                                                                                                                                                                                                                                                                                                                                                                                                                                                                                                                                                                                                                                                                                                                                                                                                                                                                                                                                                                                                                                                                                                                                                                                                                                                                                                                                                                                                                                                                                                                                                                                                                                                                                                                                                                                                                                                                                                                                                                                                                                                                                                                                                                                                                                                                                                                                                                                                                                                                                                                                                                                                                                                | Batangas City Health Office                                                                                                                                                                                                                                                                     | Research Institute for Tropical Medicine                                                                                                                                                                                                                                                                                                                                                                                            | Catalino Demetria; Daria Manalo; Edelwisa Mercado; Francisco Gerardo Polotan; Hannah Leah Morito; Inez Andrea Medado; John Leonard Chan; Kirstyn Bruncker; Ma Angelica Tujan; Othoniel Jan Onza                                                                                                                                                                                                                                                                                                                                                                                                                                                                                                                                                                    |
| EPI_ISL_833333                                                                                                                                                                                                                                                                                                                                                                                                                                                                                                                                                                                                                                                                                                                                                                                                                                                                                                                                                                                                                                                                                                                                                                                                                                                                                                                                                                                                                                                                                                                                                                                                                                                                                                                                                                                                                                                                                                                                                                                                                                                                                                                                                                                                                                                                                                                                                                                                                                                                                                                                                                                                                                                                                                                                                                                                                                                                                                                                                                                                                                                                                                                                                                                                                                                                                                                                                                                                                                                                                                                                                                                                                                                                                                                                                                                                                                           |                                                                                                                                                                                                                                                                                                 |                                                                                                                                                                                                                                                                                                                                                                                                                                     |                                                                                                                                                                                                                                                                                                                                                                                                                                                                                                                                                                                                                                                                                                                                                                    |

|                                                                                                                                                                                                                                                                                                                                                                                       |                                                                                                         |                                                                                                                                        |                                                                                                                                                                                                                                                                                                                                                                                                                                                                                                                                                                                                                                                                                                                                                                                                                                                                                                                                                                                                                                                                                                                                                                                                                                                                                                                                                                                                                                                                                                                                                                                                         |
|---------------------------------------------------------------------------------------------------------------------------------------------------------------------------------------------------------------------------------------------------------------------------------------------------------------------------------------------------------------------------------------|---------------------------------------------------------------------------------------------------------|----------------------------------------------------------------------------------------------------------------------------------------|---------------------------------------------------------------------------------------------------------------------------------------------------------------------------------------------------------------------------------------------------------------------------------------------------------------------------------------------------------------------------------------------------------------------------------------------------------------------------------------------------------------------------------------------------------------------------------------------------------------------------------------------------------------------------------------------------------------------------------------------------------------------------------------------------------------------------------------------------------------------------------------------------------------------------------------------------------------------------------------------------------------------------------------------------------------------------------------------------------------------------------------------------------------------------------------------------------------------------------------------------------------------------------------------------------------------------------------------------------------------------------------------------------------------------------------------------------------------------------------------------------------------------------------------------------------------------------------------------------|
| EPI_ISL_2529850, EPI_ISL_2529852, EPI_ISL_2529854, EPI_ISL_2529856, EPI_ISL_2529858, EPI_ISL_2529861                                                                                                                                                                                                                                                                                  | Baylor College of Medicine/ GCID                                                                        | Baylor College of Medicine/ GCID                                                                                                       | Charu Agrawal; Donna Muzny; Harsha Doddapaneni; Joseph Pertosino; Paige Farinholt; Pedro A. Piedra; Qinchang Meng; Qing Meng; Richard A. Gibbs; Timothy Farinholt; Vipin Menon; Xiang Qin                                                                                                                                                                                                                                                                                                                                                                                                                                                                                                                                                                                                                                                                                                                                                                                                                                                                                                                                                                                                                                                                                                                                                                                                                                                                                                                                                                                                               |
| EPI_ISL_2083033                                                                                                                                                                                                                                                                                                                                                                       | Baylor Scott & White-Grapevine                                                                          | Baylor Scott & White-Temple                                                                                                            | Ari Rao; Kimberly Walker; Linden Morales; Marcus Volz; Shelby Hendrickson                                                                                                                                                                                                                                                                                                                                                                                                                                                                                                                                                                                                                                                                                                                                                                                                                                                                                                                                                                                                                                                                                                                                                                                                                                                                                                                                                                                                                                                                                                                               |
| EPI_ISL_529216                                                                                                                                                                                                                                                                                                                                                                        | Beijing Institute of Microbiology and Epidemiology                                                      | Beijing Institute of Microbiology and Epidemiology                                                                                     | Cui, Y.; Fan; Guo, Y.; Hang; Hou, J.; Li, B.; Mi, Z.; Mu, J.; Qin, E.; Song; Teng; Wu, Y.; Xu, Z.; Yajun.; Yang, R.; Yong, Y.; Yue; Zhang, X.                                                                                                                                                                                                                                                                                                                                                                                                                                                                                                                                                                                                                                                                                                                                                                                                                                                                                                                                                                                                                                                                                                                                                                                                                                                                                                                                                                                                                                                           |
| EPI_ISL_1423207, EPI_ISL_2615868, EPI_ISL_2758377                                                                                                                                                                                                                                                                                                                                     | Berkeley Medical Center                                                                                 | WVU and Marshall University Combined Genomics Core Facilities                                                                          | "James Denvir; James Denvir; Peter Perrotta; Peter Stollow; Ryan Percifield; Ryan Percifield"; Wesley Kimble                                                                                                                                                                                                                                                                                                                                                                                                                                                                                                                                                                                                                                                                                                                                                                                                                                                                                                                                                                                                                                                                                                                                                                                                                                                                                                                                                                                                                                                                                            |
| EPI_ISL_2107513                                                                                                                                                                                                                                                                                                                                                                       | Biochemistry and Molecular Biology Department-Faculty of Medicine, Al-Quds University                   | Biochemistry and Molecular Biology Department-Faculty of Medicine, Al-Quds University                                                  | Al-Jawabreh, A.; Ereqat, S.; Naserddin, A.                                                                                                                                                                                                                                                                                                                                                                                                                                                                                                                                                                                                                                                                                                                                                                                                                                                                                                                                                                                                                                                                                                                                                                                                                                                                                                                                                                                                                                                                                                                                                              |
| EPI_ISL_2608391, EPI_ISL_2608395                                                                                                                                                                                                                                                                                                                                                      | Borneo Medical Centre                                                                                   | Institute of Health and Community Medicine                                                                                             | Chan Chia Jui; Chua Hock Hin; David Perera; Ooi Mong How; Tonni Sia Loong Loong; Wong Jyn Shan; Wong Kiing Aik                                                                                                                                                                                                                                                                                                                                                                                                                                                                                                                                                                                                                                                                                                                                                                                                                                                                                                                                                                                                                                                                                                                                                                                                                                                                                                                                                                                                                                                                                          |
| EPI_ISL_900708                                                                                                                                                                                                                                                                                                                                                                        | Bozeman Health Deaconess Hospital                                                                       | Wiedenhft lab, Montana State University                                                                                                | Anna Nemudraia; Artem Nemudryi; Calvin Cicha; Deann T. Snyder; Diane Bimczok; Helen Lee; Jodi F. Hedges; Joseph Nichols; Karl K. Vanderwood; Mark A. Jutlia and Blake Wiedenhft; Tanner Wiegand                                                                                                                                                                                                                                                                                                                                                                                                                                                                                                                                                                                                                                                                                                                                                                                                                                                                                                                                                                                                                                                                                                                                                                                                                                                                                                                                                                                                         |
| EPI_ISL_1253816, EPI_ISL_1743907, EPI_ISL_1744188, EPI_ISL_1744257, EPI_ISL_1786987, EPI_ISL_1825316, EPI_ISL_1825321, EPI_ISL_1825322, EPI_ISL_1825553, EPI_ISL_1825586, EPI_ISL_1918919, EPI_ISL_1968000, EPI_ISL_1968007, EPI_ISL_1968369, EPI_ISL_1968371, EPI_ISL_1968372, EPI_ISL_1968435, EPI_ISL_1971653, EPI_ISL_1971724, EPI_ISL_1971811, EPI_ISL_1971855, EPI_ISL_1971900, |                                                                                                         |                                                                                                                                        |                                                                                                                                                                                                                                                                                                                                                                                                                                                                                                                                                                                                                                                                                                                                                                                                                                                                                                                                                                                                                                                                                                                                                                                                                                                                                                                                                                                                                                                                                                                                                                                                         |
| see above                                                                                                                                                                                                                                                                                                                                                                             | Broad Institute Clinical Research Sequencing Platform                                                   | Infectious Disease Program, Broad Institute of Harvard and MIT                                                                         | Adams, G.; B.L.; B.W.; Bauer, M.; Birren; Blumenstiel, B.; Brown, C.; Carter, A.; Chaluvaldi, S.; D.J.; DeFelice, M.; DeRuff, K.; Dodge, S.; Gabriel, S.; Gallagher, G.; Gladden-Young, A.; Granger, B.; J.E.; K.J.; Lagerborg, K.; Larkin, K.; Lee, M.; Lemieux; Lennon, N.; Loreth, C.; MacInnis; Madoff, L.; McGovern, S.; Meldrum, J.; Normandin, E.; P.C.; Park; Pearlman, L.; Reilly, S.; Rudy, M.; Sabeti; Siddle; Smole, S.; Tomkins-Tinch, C.; Vicente, G.; and MacInnis; and Sabeti                                                                                                                                                                                                                                                                                                                                                                                                                                                                                                                                                                                                                                                                                                                                                                                                                                                                                                                                                                                                                                                                                                           |
| EPI_ISL_2558058, EPI_ISL_2558061                                                                                                                                                                                                                                                                                                                                                      | Bureau Of Quarantine (BOQ)                                                                              | Philippine Genome Center                                                                                                               | Alethea R. de Guzman; Anna Ong-Lim; Arianne A. Zamora; Asia Louisa U. Chong; Benedict A. Maralit; Candice Francheska B. Tambaao; Carlo M. Lapid; Celia Carlos; Devon Ray Pacial; Edsel Maurice Salvaña; El King D. Morado; Elcid Aaron R. Pangilinan; Eva Maria Cutiongco-de la Paz; Francis A. Tablizo; Irish Coleen A. Asin; Jaime C. Montoya; Jan Michael C. Yap; Jo-Hannah S. Llamas; John Q. Wong; Joshua Gregor A. Dizon; Juan Antonio R. Magalang; Karol Sophia Agape R. Padilla; Kenneth M. Kim; Kris P. Punayan; Marc Edsel C. Ayes; Maria Rosario Singh-Vergeire and Cynthia P. Saloma; Maria Sofia L. Yanzgon; Marissa Alejandria; Razel Nikka M. Hao; Renato Jacinto Q. Mantaring; Rianna Patricia S. Cruz; Sheila Mae M. Araiza                                                                                                                                                                                                                                                                                                                                                                                                                                                                                                                                                                                                                                                                                                                                                                                                                                                            |
| EPI_ISL_1298474                                                                                                                                                                                                                                                                                                                                                                       | Burshtyn CCH                                                                                            | The Institute of Molecular Biology and Genetics of NASU                                                                                | M.Tukalo et al.                                                                                                                                                                                                                                                                                                                                                                                                                                                                                                                                                                                                                                                                                                                                                                                                                                                                                                                                                                                                                                                                                                                                                                                                                                                                                                                                                                                                                                                                                                                                                                                         |
| EPI_ISL_2188097                                                                                                                                                                                                                                                                                                                                                                       | Butuan Medical Center                                                                                   | Philippine Genome Center                                                                                                               | Alethea R. de Guzman; Anna Ong-Lim; Arianne A. Zamora; Asia Louisa U. Chong; Benedict A. Maralit; Candice Francheska B. Tambaao; Carlo M. Lapid; Celia Carlos; Devon Ray Pacial; Edsel Maurice Salvaña; El King D. Morado; Elcid Aaron R. Pangilinan; Eva Maria Cutiongco-de la Paz; Francis A. Tablizo; Irish Coleen A. Asin; Jaime C. Montoya; Jan Michael C. Yap; Jo-Hannah S. Llamas; John Q. Wong; Joshua Gregor A. Dizon; Juan Antonio R. Magalang; Karol Sophia Agape R. Padilla; Kenneth M. Kim; Kris P. Punayan; Marc Edsel C. Ayes; Marc Jeronne R. Castro; Maria Rosario Singh-Vergeire and Cynthia P. Saloma; Maria Sofia L. Yanzgon; Marissa Alejandria; Razel Nikka M. Hao; Rianna Patricia S. Cruz; Sheila Mae M. Araiza                                                                                                                                                                                                                                                                                                                                                                                                                                                                                                                                                                                                                                                                                                                                                                                                                                                                 |
| EPI_ISL_1371898, EPI_ISL_1371900, EPI_ISL_1371905                                                                                                                                                                                                                                                                                                                                     | C H DE LA POLYNESIE FRANCAISE                                                                           | CNR Virus des Infections Respiratoires - France SUD                                                                                    | Antonin Bal; Bruno Lina; Gregory Destras; Gwendolynne Burfin; Hadrien Regue; Laurence Josset; Martine Valette; Quentin Semanas                                                                                                                                                                                                                                                                                                                                                                                                                                                                                                                                                                                                                                                                                                                                                                                                                                                                                                                                                                                                                                                                                                                                                                                                                                                                                                                                                                                                                                                                          |
| EPI_ISL_1135056                                                                                                                                                                                                                                                                                                                                                                       | C.H. PRINCESSE GRACE                                                                                    | CNR Virus des Infections Respiratoires - France SUD                                                                                    | Antonin Bal; Bruno Lina; Gregory Destras; Gwendolynne Burfin; Hadrien Regue; Laurence Josset; Martine Valette; Quentin Semanas                                                                                                                                                                                                                                                                                                                                                                                                                                                                                                                                                                                                                                                                                                                                                                                                                                                                                                                                                                                                                                                                                                                                                                                                                                                                                                                                                                                                                                                                          |
| EPI_ISL_2341631, EPI_ISL_2500090, EPI_ISL_2500168, EPI_ISL_2500194                                                                                                                                                                                                                                                                                                                    | CA DPH Viral and Rickettsial Disease Laboratory                                                         | Chan-Zuckerberg Biohub                                                                                                                 | CZB Cliahub Consortium                                                                                                                                                                                                                                                                                                                                                                                                                                                                                                                                                                                                                                                                                                                                                                                                                                                                                                                                                                                                                                                                                                                                                                                                                                                                                                                                                                                                                                                                                                                                                                                  |
| EPI_ISL_1629150                                                                                                                                                                                                                                                                                                                                                                       | CERBALLIANCE                                                                                            | UMR PIMIT                                                                                                                              | Dr Camille Lebarberaugh; Dr David A Wilkinson; Dr Patrick Mavingui; Magali Turpin                                                                                                                                                                                                                                                                                                                                                                                                                                                                                                                                                                                                                                                                                                                                                                                                                                                                                                                                                                                                                                                                                                                                                                                                                                                                                                                                                                                                                                                                                                                       |
| EPI_ISL_2562031, EPI_ISL_2562045                                                                                                                                                                                                                                                                                                                                                      | CH Princesse Grace                                                                                      | Cerba lab                                                                                                                              | Aude Lessenne; Bénédicte Roquebert; Emmanuel Lecorche; Kader Merah; Laura Verdum; Patrice Herisson; Sabine Trombert-Paolantoni; Stéphanie Haim-Boukobza; Thierry Collin                                                                                                                                                                                                                                                                                                                                                                                                                                                                                                                                                                                                                                                                                                                                                                                                                                                                                                                                                                                                                                                                                                                                                                                                                                                                                                                                                                                                                                 |
| EPI_ISL_2694671                                                                                                                                                                                                                                                                                                                                                                       | CHRIS HANI BARAGWANATH                                                                                  | National Institute for Communicable Diseases of the National Health Laboratory Service                                                 | Amoako DG; Bhiman JN; Everatt J; Ismail A; Mahlangu B; Mnguni A; Mohale T; Ntuli N; Scheepers C                                                                                                                                                                                                                                                                                                                                                                                                                                                                                                                                                                                                                                                                                                                                                                                                                                                                                                                                                                                                                                                                                                                                                                                                                                                                                                                                                                                                                                                                                                         |
| EPI_ISL_2454656, EPI_ISL_2454659                                                                                                                                                                                                                                                                                                                                                      | CHRIS HANI BARAGWANATH LABORATORY                                                                       | National Institute for Communicable Diseases of the National Health Laboratory Service                                                 | Amoako DG; Bhiman JN; Everatt J; Ismail A; Mahlangu B; Mohale T; Ntuli N; Scheepers C                                                                                                                                                                                                                                                                                                                                                                                                                                                                                                                                                                                                                                                                                                                                                                                                                                                                                                                                                                                                                                                                                                                                                                                                                                                                                                                                                                                                                                                                                                                   |
| EPI_ISL_1369440                                                                                                                                                                                                                                                                                                                                                                       | CHUV                                                                                                    | Laboratory of genomics and metagenomics, Institute of Microbiology, University Hospital Centre and University of Lausanne, Switzerland | Claire Bertelli; Damien Jacot; Gilbert Greub; Sébastien Aeby; Trestan Pillonel                                                                                                                                                                                                                                                                                                                                                                                                                                                                                                                                                                                                                                                                                                                                                                                                                                                                                                                                                                                                                                                                                                                                                                                                                                                                                                                                                                                                                                                                                                                          |
| EPI_ISL_2533930, EPI_ISL_2533931, EPI_ISL_2533932                                                                                                                                                                                                                                                                                                                                     | CIAD-Hermosillo                                                                                         | Immunology Laboratory                                                                                                                  | ; Alejandra García-Gasca; Alejandra Hernández-Terán; Alejandro Sánchez-Flores; Alfredo Herrera-Estrella; Alicia Ocaña-Mondragón; Andreu Comas-García; Angel Gustavo Salas-Lais; Antonio Loza Román; Bernardo Martínez-Miguel; Blanca Taboada; Brenda Irasema Maldonado-Meza; Bruno Gómez-Gil; Carla Ivón Herrera-Najera; Carlos F. Arias; Celia Boukadida; Clara Esperanza Santacruz-Tinoco; Concepción Grajales-Muñiz; Consorcio Mexicano de Vigilancia Genómica (CoViGen-Mex). Authors (in alphabetical order); Julio Elias Alvarado-Yaah; Cristóbal Cháidez-Qúiróz; Célida Duque Molina; Célida Martínez- Rodríguez; Daniel Fregoso-Rueda; Daniel Lira Morales; Eduardo Becerril-Vargas; Fernando Fontove-Herrera; Fidencio Mejía-Nepomuceno; Francisco Pulido; Gloria Elena Espinosa-Ayala; Gloria María Molina-Salinas; Gloria Vazquez; Hector Esteban Paz-Juárez; Hector Montoya-Fuentes; Helen Haydee Fernanda Ramirez-Plascencia; Irvin González-López; Jean Pierre González; Jesús Hernández; Joel Armando Vázquez-Pérez.; Jorge Salas-Hernández; José Antonio Enciso-Moreno; José Arturo Martínez-Orozco; José Esteban Muñoz-Medina; José de Jesús Nuñez-Contreras; Juan Bautista Chale-Dzul; Julissa Enciso-Ibarra; Luis Alberto Ochoa-Carrera; Margarita Matías-Florentino; Mario Mújica-Sánchez; Marissa Perez-Garcia; María Guadalupe de Jesús Mireles-Rivera; Nelly Sélem-Mojica; Pavel Isa; Ricardo Ciria Merce; Ricardo Grande; Rosa María Gutiérrez Rios; Santiago Ávila-Rios; Selene Zárate; Susana Lopez; Verónica Mata-Haro; Victor Eduardo García-Arias; Victor Hugo Borja-Aburto |
| EPI_ISL_487465                                                                                                                                                                                                                                                                                                                                                                        | CICM-Mali                                                                                               | Bundeswehr Institut of Microbiology                                                                                                    | Antwerpen; Bestehorn-Willmann; Dürr; Heitzer; Kouriba; Maiga; Quadraogo; Rehn; Sangaré; Sogodogo; Traoré; Walter; Wölfel; Zimmermann                                                                                                                                                                                                                                                                                                                                                                                                                                                                                                                                                                                                                                                                                                                                                                                                                                                                                                                                                                                                                                                                                                                                                                                                                                                                                                                                                                                                                                                                    |
| EPI_ISL_2017662, EPI_ISL_2017663                                                                                                                                                                                                                                                                                                                                                      | CLULAB                                                                                                  | Microbiology Department                                                                                                                | Aida Gonzalez-Diaz; Carmen Ardanuy; Jordi Camara; Jordi Niubó; Laura Calatayud; M Angeles Domínguez; Miguel Fernandez-Huerta; Sara Marti                                                                                                                                                                                                                                                                                                                                                                                                                                                                                                                                                                                                                                                                                                                                                                                                                                                                                                                                                                                                                                                                                                                                                                                                                                                                                                                                                                                                                                                                |
| EPI_ISL_2105884                                                                                                                                                                                                                                                                                                                                                                       | CSL, Maryland Department of Health                                                                      | CSL, Maryland Department of Health                                                                                                     | Keller, E.; Loomis, J.; Low, K.                                                                                                                                                                                                                                                                                                                                                                                                                                                                                                                                                                                                                                                                                                                                                                                                                                                                                                                                                                                                                                                                                                                                                                                                                                                                                                                                                                                                                                                                                                                                                                         |
| EPI_ISL_1710532                                                                                                                                                                                                                                                                                                                                                                       | CURATIVE                                                                                                | New Mexico Department of Health Scientific Laboratory                                                                                  | Anastacia Griego-Fisher; D'eldra Malone; Ellie Johnson; Jennifer Benoit; Linda Salazar; Ratheesh Rajan                                                                                                                                                                                                                                                                                                                                                                                                                                                                                                                                                                                                                                                                                                                                                                                                                                                                                                                                                                                                                                                                                                                                                                                                                                                                                                                                                                                                                                                                                                  |
| EPI_ISL_2234907                                                                                                                                                                                                                                                                                                                                                                       | CYRLAB                                                                                                  | IICS-UNA                                                                                                                               | Adriana Valenzuela; Alejandra Rojas; Chyntia Diaz; Eva Nara; Fatima Cardozo; Florencia del Puerto; Joel Ortiz; Jonas Fernandez; Laura Franco; Laura Mendoza; Leticia Rojas; Magaly Martinez; Maria Eugenia Galeano.                                                                                                                                                                                                                                                                                                                                                                                                                                                                                                                                                                                                                                                                                                                                                                                                                                                                                                                                                                                                                                                                                                                                                                                                                                                                                                                                                                                     |
| EPI_ISL_2105276, EPI_ISL_2155703                                                                                                                                                                                                                                                                                                                                                      | Cagayan Valley Medical Center Molecular Laboratory                                                      | Philippine Genome Center                                                                                                               | Alethea R. de Guzman; Anna Ong-Lim; Arianne A. Zamora; Asia Louisa U. Chong; Benedict A. Maralit; Candice Francheska B. Tambaao; Carlo M. Lapid; Celia Carlos; Devon Ray Pacial; Edsel Maurice Salvaña; El King D. Morado; Eva Maria Cutiongco-de la Paz; Francis A. Tablizo; Irish Coleen A. Asin; Jaime C. Montoya; Jan Michael C. Yap; Jo-Hannah S. Llamas; John Q. Wong; Joshua Gregor A. Dizon; Juan Antonio R. Magalang; Karol Sophia Agape R. Padilla; Kenneth M. Kim; Kris P. Punayan; Marc Edsel C. Ayes; Marc Jerrone R. Castro; Maria Rosario Singh-Vergeire and Cynthia P. Saloma; Maria Sofia L. Yanzgon; Marissa Alejandria; Razel Nikka M. Hao; Rianna Patricia S. Cruz; Sheila Mae M. Araiza                                                                                                                                                                                                                                                                                                                                                                                                                                                                                                                                                                                                                                                                                                                                                                                                                                                                                            |
| EPI_ISL_2537412, EPI_ISL_2537461                                                                                                                                                                                                                                                                                                                                                      | California Department of Public Health                                                                  | California Department of Public Health                                                                                                 | CDPH IDLB COVIDNet et al                                                                                                                                                                                                                                                                                                                                                                                                                                                                                                                                                                                                                                                                                                                                                                                                                                                                                                                                                                                                                                                                                                                                                                                                                                                                                                                                                                                                                                                                                                                                                                                |
| EPI_ISL_2778814, EPI_ISL_2778817, EPI_ISL_2778831, EPI_ISL_2778833, EPI_ISL_2778873, EPI_ISL_2778886, EPI_ISL_2778903, EPI_ISL_2778937, EPI_ISL_2778944, EPI_ISL_2778951                                                                                                                                                                                                              |                                                                                                         |                                                                                                                                        |                                                                                                                                                                                                                                                                                                                                                                                                                                                                                                                                                                                                                                                                                                                                                                                                                                                                                                                                                                                                                                                                                                                                                                                                                                                                                                                                                                                                                                                                                                                                                                                                         |
| see above                                                                                                                                                                                                                                                                                                                                                                             | California Department of Public Health Valencia Branch Laboratory (CDPH VBL)                            | California Department of Public Health                                                                                                 | CDPH-COVIDNet; UCLA Technology Center for Genomics & Bioinformatics                                                                                                                                                                                                                                                                                                                                                                                                                                                                                                                                                                                                                                                                                                                                                                                                                                                                                                                                                                                                                                                                                                                                                                                                                                                                                                                                                                                                                                                                                                                                     |
| EPI_ISL_2774008                                                                                                                                                                                                                                                                                                                                                                       | Cantacuzino National Military-Medical Institute, Viral Respiratory Infections Laboratory                | Cantacuzino Institute Virology                                                                                                         | Luiza Ustea; Mihaela Lazar; Mihaela Oprea; Nicoleta Paraschiv; Sorin Dinu                                                                                                                                                                                                                                                                                                                                                                                                                                                                                                                                                                                                                                                                                                                                                                                                                                                                                                                                                                                                                                                                                                                                                                                                                                                                                                                                                                                                                                                                                                                               |
| EPI_ISL_579066, EPI_ISL_579071, EPI_ISL_579072, EPI_ISL_579480, EPI_ISL_579496, EPI_ISL_622780, EPI_ISL_622795, EPI_ISL_622799, EPI_ISL_622800, EPI_ISL_622808, EPI_ISL_622824, EPI_ISL_622827, EPI_ISL_755638, EPI_ISL_843195, EPI_ISL_843198, EPI_ISL_1082255, EPI_ISL_1904855, EPI_ISL_1967890, EPI_ISL_2406488                                                                    |                                                                                                         |                                                                                                                                        |                                                                                                                                                                                                                                                                                                                                                                                                                                                                                                                                                                                                                                                                                                                                                                                                                                                                                                                                                                                                                                                                                                                                                                                                                                                                                                                                                                                                                                                                                                                                                                                                         |
| see above                                                                                                                                                                                                                                                                                                                                                                             | Canterbury Health Laboratories                                                                          | Institute of Environmental Science and Research (ESR)                                                                                  | Anja Werno; Antje van der Linden; Arlo Upton; Chris Mansell; David Hammer; Dragana Drinkovic; Erasmus Smit; Gary McAuliffe; Hana Sofia Andersson; Hermes Perez; James Ussher; Jill Sherwood; Jing Wang; Joep de Ligt; Josh Freeman; Julia Howard; Juliet Elvy; Lauren Jelly; Mary DeAlmeida; Matt Blakiston; Matt Storey; Matthew Addlie; Michelle Balm; Muhammad Faisal; Nikki Freed; Olin Slander; Olivia Stroeven; Paula scholes; Rachel Boyle; Sally Roberts; SallyAnn Harbison; Sarah Jefferies; Shamini Muttaiyah; Susan Lin; Susan Morpeth; Susan Taylor; Timothy Blackmore; Vani Sathyendran; Veronica Playle; Virginia Hope; Xiaoyun Ren                                                                                                                                                                                                                                                                                                                                                                                                                                                                                                                                                                                                                                                                                                                                                                                                                                                                                                                                                       |
| EPI_ISL_977539                                                                                                                                                                                                                                                                                                                                                                        | Caribbean Public Health Agency                                                                          | Carrington Lab, Department of PreClinical Sciences                                                                                     | Adesh Ramsubhag; Arianne Brown-Jordan; Avery Hinds; Chinna Chinnadurai; Christine V. F. Carrington; Christopher Oura; Dr. Sharon Belmar-George; Gabriel Escobar; Jaya Jayaraman; Jerome Foster; Karla Georges; Marsha Ivey; Naresh Nandram; Nikita S. D. Sahadeo; Nuno Faria; Oliver Pybus; Rahul Naidu; Rajini Haraksingh; Risha Singh; Sarah Hill; Stanley Giddings; SueMin Nathaniel; Vernie Ramkissoon                                                                                                                                                                                                                                                                                                                                                                                                                                                                                                                                                                                                                                                                                                                                                                                                                                                                                                                                                                                                                                                                                                                                                                                              |
| EPI_ISL_872196, EPI_ISL_1588899, EPI_ISL_1589003, EPI_ISL_1589115, EPI_ISL_1591250, EPI_ISL_1591265, EPI_ISL_1591351                                                                                                                                                                                                                                                                  |                                                                                                         |                                                                                                                                        |                                                                                                                                                                                                                                                                                                                                                                                                                                                                                                                                                                                                                                                                                                                                                                                                                                                                                                                                                                                                                                                                                                                                                                                                                                                                                                                                                                                                                                                                                                                                                                                                         |
| see above                                                                                                                                                                                                                                                                                                                                                                             | Caribbean Public Health Agency                                                                          | Carrington Lab, Department of PreClinical Sciences, Faculty of Medical Sciences, The University of the West Indies                     | Adesh Ramsubhag; Arianne Brown-Jordan; Avery Hinds; Chinna Chinnadurai; Christine V. F. Carrington; Christopher Oura; Gabriel Escobar; Jaya Jayaraman; Jerome Foster; Karla Georges; Marsha Ivey; Naresh Nandram; Nikita S. D. Sahadeo; Nuno Faria; Oliver Pybus; Rahul Naidu; Rajini Haraksingh; Risha Singh; Roshan Parasram; Sarah Hill; Stanley Giddings; SueMin Nathaniel; Vernie Ramkissoon                                                                                                                                                                                                                                                                                                                                                                                                                                                                                                                                                                                                                                                                                                                                                                                                                                                                                                                                                                                                                                                                                                                                                                                                       |
| EPI_ISL_526741                                                                                                                                                                                                                                                                                                                                                                        | Center for Laboratory Control of Infectious Diseases, Korea Centers for Diseases Control and Prevention | Center for Laboratory Control of Infectious Diseases, Korea Centers for Diseases Control and Prevention                                | Ae Kyung Park; Eunkyung Shin; Heui Man Kim; Jeong-Min Kim; Jin Sun No; Junyoung Kim; Myung Gun Han; Yoon-Seok Chung                                                                                                                                                                                                                                                                                                                                                                                                                                                                                                                                                                                                                                                                                                                                                                                                                                                                                                                                                                                                                                                                                                                                                                                                                                                                                                                                                                                                                                                                                     |
| EPI_ISL_1704136, EPI_ISL_2484844                                                                                                                                                                                                                                                                                                                                                      | Center for Laboratory Medicine                                                                          | Center for Laboratory Medicine                                                                                                         | Yannick Gerth                                                                                                                                                                                                                                                                                                                                                                                                                                                                                                                                                                                                                                                                                                                                                                                                                                                                                                                                                                                                                                                                                                                                                                                                                                                                                                                                                                                                                                                                                                                                                                                           |
| EPI_ISL_2385379                                                                                                                                                                                                                                                                                                                                                                       | Center of Hygiene and Epidemiology in Belgorod Region                                                   | WHO National Influenza Centre Russian Federation                                                                                       | Alexey Masharsky; Andrey Komissarov; Artem Fadeev; Daria Danilenko; Dmitry Lioznov; Elena Nabieva; Georgii Bazykin; Kirill Varchenko; Ksenia Safina; Kseniya Komissarova; Maria Baturova; Maria Pisareva; Maria Timofeeva; Mikhail Bakaev; Nikita Yolshin; Oula Masour; Tamila Musaeva; Veronika Eder                                                                                                                                                                                                                                                                                                                                                                                                                                                                                                                                                                                                                                                                                                                                                                                                                                                                                                                                                                                                                                                                                                                                                                                                                                                                                                   |
| EPI_ISL_1760221                                                                                                                                                                                                                                                                                                                                                                       | Centers for Disease Control and Prevention, Dengue Branch                                               | Centers for Disease Control and Prevention, Dengue Branch                                                                              | Betzabel Flores; Gabriela Paz-Bailey; Gilberto A. Santiago; Glenda Gonzalez; Jorge L. Munoz-Jordan; Keyla Charriez                                                                                                                                                                                                                                                                                                                                                                                                                                                                                                                                                                                                                                                                                                                                                                                                                                                                                                                                                                                                                                                                                                                                                                                                                                                                                                                                                                                                                                                                                      |
| EPI_ISL_2455327, EPI_ISL_2455330                                                                                                                                                                                                                                                                                                                                                      | Centers for Disease Control, R.O.C. (Taiwan)                                                            | Centers for Disease Control, R.O.C. (Taiwan)                                                                                           | Ji-Rong Yang; Jung-Jung Mu; Ming-Tsan-Lin; Yu-Chi-Lin                                                                                                                                                                                                                                                                                                                                                                                                                                                                                                                                                                                                                                                                                                                                                                                                                                                                                                                                                                                                                                                                                                                                                                                                                                                                                                                                                                                                                                                                                                                                                   |
| EPI_ISL_815390                                                                                                                                                                                                                                                                                                                                                                        | Centogene                                                                                               | Centogene                                                                                                                              | Krishna Kumar Kandaswamy; Peter Bauer; Vivi Hue-Trang Lieu                                                                                                                                                                                                                                                                                                                                                                                                                                                                                                                                                                                                                                                                                                                                                                                                                                                                                                                                                                                                                                                                                                                                                                                                                                                                                                                                                                                                                                                                                                                                              |
| EPI_ISL_2285196                                                                                                                                                                                                                                                                                                                                                                       | Central Health Laboratory                                                                               | National Institute for Communicable Diseases of the National Health Laboratory Service                                                 | Allam M; Amoako DG; Baboo SB; Bhiman JN; Ismail A; Mahlangu B; Manraj SS; Mohale T; Ntuli N; Ramuth M; Sonoo J                                                                                                                                                                                                                                                                                                                                                                                                                                                                                                                                                                                                                                                                                                                                                                                                                                                                                                                                                                                                                                                                                                                                                                                                                                                                                                                                                                                                                                                                                          |
| EPI_ISL_2502389, EPI_ISL_2502391, EPI_ISL_2502393, EPI_ISL_2502398, EPI_ISL_2502414, EPI_ISL_2502415, EPI_ISL_2502419, EPI_ISL_2502430, EPI_ISL_2502437, EPI_ISL_2502453, EPI_ISL_2502464, EPI_ISL_2502467, EPI_ISL_2502468, EPI_ISL_2502473, EPI_ISL_2502487, EPI_ISL_2502489, EPI_ISL_2502491, EPI_ISL_2502495, EPI_ISL_2502496, EPI_ISL_2502497, EPI_ISL_2502514, EPI_ISL_2502521, |                                                                                                         |                                                                                                                                        |                                                                                                                                                                                                                                                                                                                                                                                                                                                                                                                                                                                                                                                                                                                                                                                                                                                                                                                                                                                                                                                                                                                                                                                                                                                                                                                                                                                                                                                                                                                                                                                                         |
| EPI_ISL_2502549, EPI_ISL_2502551, EPI_ISL_2502555, EPI_ISL_2502560, EPI_ISL_2502561, EPI_ISL_2502563                                                                                                                                                                                                                                                                                  |                                                                                                         |                                                                                                                                        |                                                                                                                                                                                                                                                                                                                                                                                                                                                                                                                                                                                                                                                                                                                                                                                                                                                                                                                                                                                                                                                                                                                                                                                                                                                                                                                                                                                                                                                                                                                                                                                                         |

|                                                                                                                                                                                                                                                                                                                                                                                                                        |                                                                                                                                                                                                                     |                                                                                                                                                                                                        |                                                                                                                                                                                                                                                                                                                                                                                                                                                                                                                                                                                                                                                                                                                                                                                                                                                                                                                                                                                                                                                                                                                                                                                                                                                                                                                                                                                                                                                                                                                                                                                                       |
|------------------------------------------------------------------------------------------------------------------------------------------------------------------------------------------------------------------------------------------------------------------------------------------------------------------------------------------------------------------------------------------------------------------------|---------------------------------------------------------------------------------------------------------------------------------------------------------------------------------------------------------------------|--------------------------------------------------------------------------------------------------------------------------------------------------------------------------------------------------------|-------------------------------------------------------------------------------------------------------------------------------------------------------------------------------------------------------------------------------------------------------------------------------------------------------------------------------------------------------------------------------------------------------------------------------------------------------------------------------------------------------------------------------------------------------------------------------------------------------------------------------------------------------------------------------------------------------------------------------------------------------------------------------------------------------------------------------------------------------------------------------------------------------------------------------------------------------------------------------------------------------------------------------------------------------------------------------------------------------------------------------------------------------------------------------------------------------------------------------------------------------------------------------------------------------------------------------------------------------------------------------------------------------------------------------------------------------------------------------------------------------------------------------------------------------------------------------------------------------|
| see above                                                                                                                                                                                                                                                                                                                                                                                                              | Central Laboratory, Bureau of Public Health (BOG) and Academic Hospital Paramaribo                                                                                                                                  | Erasmus Medical Center                                                                                                                                                                                 | Bas B Oude Munnink; Cherise Beek; Consuella Partowidjojo; Gidon Gajand; Ed PF Iljerman; Emmanuelle Munguer; Gary Gummels; Ingrid SK Krishnadath; Lydie Wottieitz; Marion PG Koopmans; Mireille Van de Veer; Phyllis Pinas; Princes Wongsowidjojo; Radjesh Or; Ranisha Doerbalie; Rohma Banwari; Soeraad Harkissen; Stephen Vreden; Tilotmadebie Ramli; Verne Nanhoos                                                                                                                                                                                                                                                                                                                                                                                                                                                                                                                                                                                                                                                                                                                                                                                                                                                                                                                                                                                                                                                                                                                                                                                                                                  |
| EPI_ISL_693477, EPI_ISL_693478, EPI_ISL_693479, EPI_ISL_693480, EPI_ISL_693481, EPI_ISL_693482, EPI_ISL_693483, EPI_ISL_1307644, EPI_ISL_1307676, EPI_ISL_1307678, EPI_ISL_1322321, EPI_ISL_1322330                                                                                                                                                                                                                    | Central Public Health Laboratory                                                                                                                                                                                    | National Public Health Laboratory, National Centre for Infectious Diseases                                                                                                                             | Esorom Daoni; Lin Cui; Raymond Tzer Pin Lin; Sophie Octavia; Theresa Palou; Tze Minn Mak; Zhenyang Zhou                                                                                                                                                                                                                                                                                                                                                                                                                                                                                                                                                                                                                                                                                                                                                                                                                                                                                                                                                                                                                                                                                                                                                                                                                                                                                                                                                                                                                                                                                               |
| EPI_ISL_1827727                                                                                                                                                                                                                                                                                                                                                                                                        | Centralny Szpital Kliniczny MSWiA w Warszawie                                                                                                                                                                       | 1. Virogenetics Laboratory of Virology, Malopolska Centre of Biotechnology, Jagiellonian University. 2. Intercollegiate Faculty of Biotechnology University of Gdansk and Medical University of Gdansk | Adam Sybilski; Anna Meler; Krystyna Bienkowska-Szewczyk; Krzysztof Pyrc; Lukasz Rabalski; Maciej Kosinski; Michal Hampel; Natalia Mazur-Panasik; Slawomir Butkiewicz                                                                                                                                                                                                                                                                                                                                                                                                                                                                                                                                                                                                                                                                                                                                                                                                                                                                                                                                                                                                                                                                                                                                                                                                                                                                                                                                                                                                                                  |
| EPI_ISL_525476                                                                                                                                                                                                                                                                                                                                                                                                         | Centre for Dengue Research                                                                                                                                                                                          | Centre for Dengue Research                                                                                                                                                                             | Chandima Jeewandara; Deshni Jayathilaka; Dinuka Ariyaratne; Dinuka Guruge; Diyanath Ranasinghe; Gathsaurie Neelika Malavige; Laksiri Gomes; Ruwan Wijayamuni                                                                                                                                                                                                                                                                                                                                                                                                                                                                                                                                                                                                                                                                                                                                                                                                                                                                                                                                                                                                                                                                                                                                                                                                                                                                                                                                                                                                                                          |
| EPI_ISL_525474                                                                                                                                                                                                                                                                                                                                                                                                         | Centre for Dengue Research                                                                                                                                                                                          | Centre for Dengue Research, USJ, SL                                                                                                                                                                    | Chandima Jeewandara; Deshni Jayathilaka; Dinuka Ariyaratne; Dinuka Guruge; Diyanath Ranasinghe; Gathsaurie Neelika Malavige; Laksiri Gomes; Ruwan Wijayamuni                                                                                                                                                                                                                                                                                                                                                                                                                                                                                                                                                                                                                                                                                                                                                                                                                                                                                                                                                                                                                                                                                                                                                                                                                                                                                                                                                                                                                                          |
| EPI_ISL_1233058, EPI_ISL_1233066, EPI_ISL_1233070, EPI_ISL_1233081, EPI_ISL_1233104, EPI_ISL_1233110, EPI_ISL_1233129, EPI_ISL_1239365, EPI_ISL_1533838, EPI_ISL_1533849, EPI_ISL_1970360, EPI_ISL_1970377, EPI_ISL_1970379, EPI_ISL_1970380, EPI_ISL_1970396, EPI_ISL_1970418, EPI_ISL_2481409, EPI_ISL_2481411, EPI_ISL_2481428, EPI_ISL_2481438, EPI_ISL_2600339, EPI_ISL_2600342, EPI_ISL_2600343, EPI_ISL_2600345 | Centre for Dengue Research and AICBU, Department of Immunology and Molecular Medicine                                                                                                                               | Centre for Dengue Research and AICBU, Department of Immunology and Molecular Medicine                                                                                                                  | Chandima Jeewandara; Deshan Madhusanka; Deshni Jayathilaka; Dinuka Ariyaratne; Diyanath Ranasinghe; Gathsaurie Neelika Malavige; Laksiri Gomes; Tibutius Thanesh Pramanayagam                                                                                                                                                                                                                                                                                                                                                                                                                                                                                                                                                                                                                                                                                                                                                                                                                                                                                                                                                                                                                                                                                                                                                                                                                                                                                                                                                                                                                         |
| EPI_ISL_2399460                                                                                                                                                                                                                                                                                                                                                                                                        | Centre for Human Virology and Genomics, Microbiology Department, Nigerian Institute of Medical Research                                                                                                             | Central Research Laboratory, Nigerian Institute of Medical Research                                                                                                                                    | Ayorinde Babatunde James; Azuka Patrick Okwuraibe; Babatunde Lawal Salako; Bamidele Iwalokun; Kingsley Onwuama; Grace Oni; Joseph Ojonugwa Shaibu; Josiah Ayoola Isong; Joy Ayoola; Muinah Adenike Fowora; Ngozi Mirabel Otunye; Nyam Itse Yusuf; Olufemi Samuel Amoo; Phasha-Muchemanye Mmatshopho; Rahaman A. Ahmed; Rosemary Ajuma Adau; Sharon Abimbola; Sola Alibay; Yui Emokape; Yusuf Jimoh                                                                                                                                                                                                                                                                                                                                                                                                                                                                                                                                                                                                                                                                                                                                                                                                                                                                                                                                                                                                                                                                                                                                                                                                    |
| EPI_ISL_413550                                                                                                                                                                                                                                                                                                                                                                                                         | Centre for Human and Zoonotic Virology (CHAZVY), College of Medicine University of Lagos/Lagos University Teaching Hospital (LUTH), part of the Laboratory Network of the Nigeria Centre for Disease Control (NCDC) | African Centre of Excellence for Genomics of Infectious Diseases (ACEGID), Redeemer's University, Ede, Osun State, Nigeria                                                                             | Ajogbasile F.V.; Folarin O.A.; Ihekweazu C. Happi C.T.; Kayode A.; Oguzie J.; Oluniyi P.E.                                                                                                                                                                                                                                                                                                                                                                                                                                                                                                                                                                                                                                                                                                                                                                                                                                                                                                                                                                                                                                                                                                                                                                                                                                                                                                                                                                                                                                                                                                            |
| EPI_ISL_2231325                                                                                                                                                                                                                                                                                                                                                                                                        | Centro de Diagnostico COVID-19 UABC Tijuana                                                                                                                                                                         | Andersen lab at Scripps Research                                                                                                                                                                       | German Ibarra; Jonathan Vincent Baena; Jorge Luis Jimenez Niebla; Manuel Sanchez Alavez; Oscar Efrén Zazueta Fierro; SEARCH Alliance San Diego with Idanya Rubi Serafin Higuera                                                                                                                                                                                                                                                                                                                                                                                                                                                                                                                                                                                                                                                                                                                                                                                                                                                                                                                                                                                                                                                                                                                                                                                                                                                                                                                                                                                                                       |
| EPI_ISL_2031711, EPI_ISL_2031718, EPI_ISL_2031746, EPI_ISL_2031748                                                                                                                                                                                                                                                                                                                                                     | Centro de Innovación en Vigilancia Epidemiológica (CIVE), Institut Pasteur Montevideo, Uruguay                                                                                                                      | Centro de Innovación en Vigilancia Epidemiológica (CIVE), Institut Pasteur Montevideo, Uruguay                                                                                                         | Alicia Costáble; Alvaro Fajardo; Andrés Lizaso; Belén González; Bernardina Rivera; Cecilia Alonso; Cecilia Salazar; Gonzalo Moratorio; Gregorio Iraola; Henry Alborno; Ignacio Ferrés; Inés Bellini; Juan Zanetti; Julio Medina; Lucia Bilbao; Luciana Grifffero; Lucia Spangenberg; Ma Noel Bentancor; Ma Pia Techera; Mailen Arleo; Martina Alonso; María José Benítez; Matías Maidana; Mauricio Méndez; Melissa Duquia; Mercedes Paz; Natalia Rego; Natalia Reyes; Odhille Chappos; Paula Perbollianachis; Pilar Moreno; Rodney Colina; Rodrigo Arce; Tamara Fernández; Tania Possi                                                                                                                                                                                                                                                                                                                                                                                                                                                                                                                                                                                                                                                                                                                                                                                                                                                                                                                                                                                                                |
| EPI_ISL_1662123, EPI_ISL_1662125, EPI_ISL_1662127                                                                                                                                                                                                                                                                                                                                                                      | Centro de Investigación Biomedica de Occidente (CIBO)                                                                                                                                                               | Unidad de Genomica Avanzada                                                                                                                                                                            | Alejandro Sanchez-Flores; Alfredo Herrera-Estrella; Alicia Ocaña-Mondragón; Angel Gustavo Salas-Lais; Bernardo Martínez-Miguel; Blanca Taboada; Brenda Irasema Maldonado-Meza; Carla Ivon Herrera-Najera; Carlos F. Arias; Celia Boukadida; Celida Duque Molina; Clara Esperanza Santacruz-Tinoco; Concepción Grajales-Muniz; Consorcio Mexicano de Vigilancia Genómica (CoViGen-Mex). Authors (in alphabetical order): Julio Elias Alvarado-Yaah; Fernando Fontove-Herrera; Francisco Pulido; Gloria Elena Espinoza-Ayala; Gloria María Molina-Salinas; Gloria Vazquez; Hector Esteban Paz-Juárez; Hector Montoya-Fuentes; Helen Haydee Fernanda Ramirez-Plascencia; Jose Antonio Enciso-Moreno; Jose Esteban Muñoz-Medina; Jose de Jesus Nunez-Contreras; Juan Bautista Chale-Dzul; Luis Alberto Ochoa-Carrera; Margarita Matias-Florentino; María Guadalupe Santiago-Mauricio; María Guadalupe de Jesus Mireles-Rivera; Nelly Sélem-Mojica; Pavel Isa; Ricardo Grande; Santiago Avila-Rios; Victor Eduardo Garcia-Arias; Victor Hugo Borja-Aburto                                                                                                                                                                                                                                                                                                                                                                                                                                                                                                                                                  |
| EPI_ISL_1351549, EPI_ISL_1351552, EPI_ISL_1351617                                                                                                                                                                                                                                                                                                                                                                      | Centro de Investigación Biomédica de Occidente (CIBO)                                                                                                                                                               | Unidad de Genomica Avanzada                                                                                                                                                                            | Alejandro Sanchez-Flores; Alfredo Herrera-Estrella; Alicia Ocaña-Mondragón; Angel Gustavo Salas-Lais; Bernardo Martínez-Miguel; Blanca Taboada; Brenda Irasema Maldonado-Meza; Carla Ivon Herrera-Najera; Carlos F. Arias; Celia Boukadida; Clara Esperanza Santacruz-Tinoco; Concepción Grajales-Muniz; Consorcio Mexicano de Vigilancia Genómica (CoViGen-Mex). Authors (in alphabetical order): Julio Elias Alvarado-Yaah; Fernando Fontove-Herrera; Francisco Pulido; Gloria Elena Espinoza-Ayala; Gloria María Molina-Salinas; Gloria Vazquez; Hector Esteban Paz-Juárez; Hector Montoya-Fuentes; Helen Haydee Fernanda Ramirez-Plascencia; Jorge Ivan Salinal-Navarez; Jose Antonio Enciso-Moreno; Jose Esteban Muñoz-Medina; Jose de Jesus Nunez-Contreras; Juan Bautista Chale-Dzul; Luis Alberto Ochoa-Carrera; Margarita Matias-Florentino; María Guadalupe Santiago-Mauricio; María Guadalupe de Jesus Mireles-Rivera; Nelly Sélem-Mojica; Pavel Isa; Ricardo Grande; Santiago Avila-Rios; Victor Hugo Borja-Aburto                                                                                                                                                                                                                                                                                                                                                                                                                                                                                                                                                                        |
| EPI_ISL_1351416, EPI_ISL_1351437, EPI_ISL_1351439                                                                                                                                                                                                                                                                                                                                                                      | Centro de Investigación Biomédica de Occidente (CIBO)                                                                                                                                                               | Unidad de Genomica Avanzada                                                                                                                                                                            | Alejandro Sanchez-Flores; Alfredo Herrera-Estrella; Alicia Ocaña-Mondragón; Angel Gustavo Salas-Lais; Bernardo Martínez-Miguel; Blanca Taboada; Brenda Irasema Maldonado-Meza; Carla Ivon Herrera-Najera; Carlos F. Arias; Celia Boukadida; Clara Esperanza Santacruz-Tinoco; Concepción Grajales-Muniz; Consorcio Mexicano de Vigilancia Genómica (CoViGen-Mex). Authors (in alphabetical order): Julio Elias Alvarado-Yaah; Fernando Fontove-Herrera; Francisco Pulido; Gloria Elena Espinoza-Ayala; Gloria María Molina-Salinas; Gloria Vazquez; Hector Esteban Paz-Juárez; Hector Montoya-Fuentes; Helen Haydee Fernanda Ramirez-Plascencia; Jose Antonio Enciso-Moreno; Jose Esteban Muñoz-Medina; Jose de Jesus Nunez-Contreras; Juan Bautista Chale-Dzul; Luis Alberto Ochoa-Carrera; Margarita Matias-Florentino; María Guadalupe Santiago-Mauricio; María Guadalupe de Jesus Mireles-Rivera; Nelly Sélem-Mojica; Pavel Isa; Ricardo Grande; Santiago Avila-Rios; Victor Hugo Borja-Aburto                                                                                                                                                                                                                                                                                                                                                                                                                                                                                                                                                                                                    |
| EPI_ISL_2490395, EPI_ISL_2490398, EPI_ISL_2490495                                                                                                                                                                                                                                                                                                                                                                      | Centro de Investigación Biomédica de Occidente (CIBO)                                                                                                                                                               | Centro de Investigación en Enfermedades Infecciosas (CIENI), Instituto Nacional de Enfermedades Respiratorias (INER)                                                                                   | ; Alejandra Garcia-Gasca; Alejandra Hernández-Terán; Alejandro Sanchez-Flores; Alfredo Herrera-Estrella; Alicia Ocaña-Mondragón; Andreu Comas-García; Angel Gustavo Salas-Lais; Antonio Loza Román; Bernardo Martínez-Miguel; Blanca Taboada; Brenda Irasema Maldonado-Meza; Bruno Gomez-Gil; Carla Ivón Herrera-Najera; Carlos F. Arias; Celia Boukadida; Clara Esperanza Santacruz-Tinoco; Concepción Grajales-Muñiz; Consorcio Mexicano de Vigilancia Genómica (CoViGen-Mex). Authors (in alphabetical order): Julio Elias Alvarado-Yaah; Cristóbal Cháidez-Quiroz; Célida Duque Molina; Célida Martínez- Rodríguez; Daniel Fregoso-Rueda; Daniel Lira Morales; Eduardo Becerril-Vargas; Fernando Fontove-Herrera; Fidencio Mejía-Nepomuceno; Francisco Pulido; Gloria Elena Espinoza-Ayala; Gloria María Molina-Salinas; Gloria Vazquez; Hector Esteban Paz-Juárez; Hector Montoya-Fuentes; Helen Haydee Fernanda Ramirez-Plascencia; Irvin González-López; Jean Pierre González; Joel Armando Vázquez-Pérez.; Jorge Salas-Hernández; José Antonio Enciso-Moreno; José Arturo Martínez-Orozco; José Esteban Muñoz-Medina; José de Jesús Nuñez-Contreras; Juan Bautista Chale-Dzul; Julissa Enciso-Ibarra; Luis Alberto Ochoa-Carrera; Margarita Matias-Florentino; Mario Mújica-Sánchez; Marissa Perez-Garcia; María Guadalupe Santiago-Mauricio; María Guadalupe de Jesús Mireles-Rivera; Nelly Sélem-Mojica; Pavel Isa; Ricardo Ciria Merce; Ricardo Grande; Rosa María Gutierrez Rios; Santiago Avila-Rios; Selene Zárate; Susana Lopez; Victor Eduardo Garcia-Arias; Victor Hugo Borja-Aburto |
| EPI_ISL_1585494                                                                                                                                                                                                                                                                                                                                                                                                        | Centro de Investigación Biomédica de Occidente (CIBO)                                                                                                                                                               | Instituto Nacional de Enfermedades Respiratorias (INER): Centro de Investigación en Enfermedades Infecciosas (CIENI)                                                                                   | Alejandro Sanchez-Flores; Alfredo Herrera-Estrella; Alicia Ocaña-Mondragón; Angel Gustavo Salas-Lais; Bernardo Martínez-Miguel; Blanca Taboada; Brenda Irasema Maldonado-Meza; Carla Ivón Herrera-Najera; Carlos F. Arias; Celia Boukadida; Clara Esperanza Santacruz-Tinoco; Concepción Grajales-Muñiz; Consorcio Mexicano de Vigilancia Genómica (CoViGen-Mex). Authors (in alphabetical order): Julio Elias Alvarado-Yaah; Fernando Fontove-Herrera; Francisco Pulido; Gloria Elena Espinoza-Ayala; Gloria María Molina-Salinas; Gloria Vazquez; Hector Esteban Paz-Juárez; Hector Montoya-Fuentes; Helen Haydee Fernanda Ramirez-Plascencia; Jose Antonio Enciso-Moreno; Jose Esteban Muñoz-Medina; Jose de Jesus Nunez-Contreras; Juan Bautista Chale-Dzul; Luis Alberto Ochoa-Carrera; Margarita Matias-Florentino; María Guadalupe Santiago-Mauricio; María Guadalupe de Jesus Mireles-Rivera; Nelly Sélem-Mojica; Pavel Isa; Ricardo Grande; Santiago Avila-Rios; Victor Eduardo Garcia-Arias; Victor Hugo Borja-Aburto                                                                                                                                                                                                                                                                                                                                                                                                                                                                                                                                                                       |
| EPI_ISL_2402142, EPI_ISL_2402153                                                                                                                                                                                                                                                                                                                                                                                       | Centro de Investigación Biomédica de Occidente (CIBO)                                                                                                                                                               | Unidad de Genomica Avanzada                                                                                                                                                                            | Alejandro Sanchez-Flores; Alfredo Herrera-Estrella; Alicia Ocaña-Mondragón; Angel Gustavo Salas-Lais; Bernardo Martínez-Miguel; Blanca Taboada; Brenda Irasema Maldonado-Meza; Carla Ivon Herrera-Najera; Carlos F. Arias; Celia Boukadida; Clara Esperanza Santacruz-Tinoco; Concepción Grajales-Muniz; Consorcio Mexicano de Vigilancia Genómica (CoViGen-Mex). Authors (in alphabetical order): Julio Elias Alvarado-Yaah; Fernando Fontove-Herrera; Francisco Pulido; Gloria Elena Espinoza-Ayala; Gloria María Molina-Salinas; Gloria Vazquez; Hector Esteban Paz-Juárez; Hector Montoya-Fuentes; Helen Haydee Fernanda Ramirez-Plascencia; Jorge Ivan Salinal-Navarez; Jose Antonio Enciso-Moreno; Jose Esteban Muñoz-Medina; Jose de Jesus Nunez-Contreras; Juan Bautista Chale-Dzul; Luis Alberto Ochoa-Carrera; Margarita Matias-Florentino; María Guadalupe Santiago-Mauricio; María Guadalupe de Jesus Mireles-Rivera; Nelly Sélem-Mojica; Pavel Isa; Ricardo Grande; Santiago Avila-Rios; Victor Hugo Borja-Aburto                                                                                                                                                                                                                                                                                                                                                                                                                                                                                                                                                                        |
| EPI_ISL_2091174, EPI_ISL_2091179, EPI_ISL_2091183, EPI_ISL_2091193, EPI_ISL_2091208, EPI_ISL_2490339, EPI_ISL_2490442                                                                                                                                                                                                                                                                                                  |                                                                                                                                                                                                                     |                                                                                                                                                                                                        |                                                                                                                                                                                                                                                                                                                                                                                                                                                                                                                                                                                                                                                                                                                                                                                                                                                                                                                                                                                                                                                                                                                                                                                                                                                                                                                                                                                                                                                                                                                                                                                                       |
| see above                                                                                                                                                                                                                                                                                                                                                                                                              | Centro de Investigación Biomédica del Noreste (CIBIN)                                                                                                                                                               | Centro de Investigación en Enfermedades Infecciosas (CIENI), Instituto Nacional de Enfermedades Respiratorias (INER)                                                                                   | ; Alejandra Garcia-Gasca; Alejandra Hernández-Terán; Alejandro Sanchez-Flores; Alfredo Herrera-Estrella; Alicia Ocaña-Mondragón; Andreu Comas-García; Angel Gustavo Salas-Lais; Antonio Loza Román; Bernardo Martínez-Miguel; Blanca Taboada; Brenda Irasema Maldonado-Meza; Bruno Gomez-Gil; Carla Ivón Herrera-Najera; Carlos F. Arias; Celia Boukadida; Clara Esperanza Santacruz-Tinoco; Concepción Grajales-Muñiz; Consorcio Mexicano de Vigilancia Genómica (CoViGen-Mex). Authors (in alphabetical order): Julio Elias Alvarado-Yaah; Cristóbal Cháidez-Quiroz; Célida Duque Molina; Célida Martínez- Rodríguez; Daniel Fregoso-Rueda; Daniel Lira Morales; Eduardo Becerril-Vargas; Fernando Fontove-Herrera; Fidencio Mejía-Nepomuceno; Francisco Pulido; Gloria Elena Espinoza-Ayala; Gloria María Molina-Salinas; Gloria Vazquez; Hector Esteban Paz-Juárez; Hector Montoya-Fuentes; Helen Haydee Fernanda Ramirez-Plascencia; Irvin González-López; Jean Pierre González; Joel Armando Vázquez-Pérez.; Jorge Salas-Hernández; José Antonio Enciso-Moreno; José Arturo Martínez-Orozco; José Esteban Muñoz-Medina; José de Jesús Nuñez-Contreras; Juan Bautista Chale-Dzul; Julissa Enciso-Ibarra; Luis Alberto Ochoa-Carrera; Margarita Matias-Florentino; Mario Mújica-Sánchez; Marissa Perez-Garcia; María Guadalupe Santiago-Mauricio; María Guadalupe de Jesús Mireles-Rivera; Nelly Sélem-Mojica; Pavel Isa; Ricardo Ciria Merce; Ricardo Grande; Rosa María Gutierrez Rios; Santiago Avila-Rios; Selene Zárate; Susana Lopez; Victor Eduardo Garcia-Arias; Victor Hugo Borja-Aburto |
| EPI_ISL_1279502, EPI_ISL_1279529, EPI_ISL_1585390                                                                                                                                                                                                                                                                                                                                                                      | Centro de Investigación Biomédica del Noreste (CIBIN)                                                                                                                                                               | Instituto Nacional de Enfermedades Respiratorias (INER): Centro de Investigación en Enfermedades Infecciosas (CIENI)                                                                                   | Alejandro Sanchez-Flores; Alfredo Herrera-Estrella; Alicia Ocaña-Mondragón; Angel Gustavo Salas-Lais; Bernardo Martínez-Miguel; Blanca Taboada; Brenda Irasema Maldonado-Meza; Carla Ivón Herrera-Najera; Carlos F. Arias; Celia Boukadida; Clara Esperanza Santacruz-Tinoco; Concepción Grajales-Muñiz; Consorcio Mexicano de Vigilancia Genómica (CoViGen-Mex). Authors (in alphabetical order): Julio Elias Alvarado-Yaah; Fernando Fontove-Herrera; Francisco Pulido; Gloria Elena Espinoza-Ayala; Gloria María Molina-Salinas; Gloria Vazquez; Hector Esteban Paz-Juárez; Hector Montoya-Fuentes; Helen Haydee Fernanda Ramirez-Plascencia; Jorge Ivan Salinal-Navarez; Jose Antonio Enciso-Moreno; Jose Esteban Muñoz-Medina; Jose de Jesus Nunez-Contreras; Juan Bautista Chale-Dzul; Luis Alberto Ochoa-Carrera; Margarita Matias-Florentino; María Guadalupe Santiago-Mauricio; María Guadalupe de Jesus Mireles-Rivera; Nelly Sélem-Mojica; Pavel Isa; Ricardo Grande; Santiago Avila-Rios; Victor Eduardo Garcia-Arias; Victor Hugo Borja-Aburto                                                                                                                                                                                                                                                                                                                                                                                                                                                                                                                                           |
| EPI_ISL_2391588                                                                                                                                                                                                                                                                                                                                                                                                        | Centro de Investigación Biomédica del Noreste (CIBIN)                                                                                                                                                               | Instituto de Biotecnología de la UNAM                                                                                                                                                                  | ; Alejandra Garcia-Gasca; Alejandra Hernández-Terán; Alejandro Sanchez-Flores; Alfredo Herrera-Estrella; Alicia Ocaña-Mondragón; Andreu Comas-García; Angel Gustavo Salas-Lais; Antonio Loza Román; Bernardo Martínez-Miguel; Blanca Taboada; Brenda Irasema Maldonado-Meza; Bruno Gomez-Gil; Carla Ivón Herrera-Najera; Carlos F. Arias; Celia Boukadida; Clara Esperanza Santacruz-Tinoco; Concepción Grajales-Muñiz; Consorcio Mexicano de Vigilancia Genómica (CoViGen-Mex). Authors (in alphabetical order): Julio Elias Alvarado-Yaah; Cristóbal Cháidez-Quiroz; Célida Duque Molina; Célida Martínez- Rodríguez; Daniel Fregoso-Rueda; Daniel Lira Morales; Eduardo Becerril-Vargas; Fernando Fontove-Herrera; Fidencio Mejía-Nepomuceno; Francisco Pulido; Gloria Elena Espinoza-Ayala; Gloria María Molina-Salinas; Gloria Vazquez; Hector Esteban Paz-Juárez; Hector Montoya-Fuentes; Helen Haydee Fernanda Ramirez-Plascencia; Irvin González-López; Jean Pierre González; Joel Armando Vázquez-Pérez.; Jorge Salas-Hernández; José Antonio Enciso-Moreno; José Arturo Martínez-Orozco; José Esteban Muñoz-Medina; José de Jesús Nuñez-Contreras; Juan Bautista Chale-Dzul; Julissa Enciso-Ibarra; Luis Alberto Ochoa-Carrera; Margarita Matias-Florentino; Mario Mújica-Sánchez; María Guadalupe Santiago-Mauricio; María Guadalupe de Jesús Mireles-Rivera; Nelly Sélem-Mojica; Pavel Isa; Ricardo Ciria Merce; Ricardo Grande; Rosa María Gutierrez Rios; Santiago Avila-Rios; Selene Zárate; Susana Lopez; Victor Eduardo Garcia-Arias; Victor Hugo Borja-Aburto                       |
| EPI_ISL_2401935, EPI_ISL_2401949                                                                                                                                                                                                                                                                                                                                                                                       | Centro de Investigación Biomédica del Noreste (CIBIN)                                                                                                                                                               | Unidad de Genomica Avanzada                                                                                                                                                                            | Alejandro Sanchez-Flores; Alfredo Herrera-Estrella; Alicia Ocaña-Mondragón; Angel Gustavo Salas-Lais; Bernardo Martínez-Miguel; Blanca Taboada; Brenda Irasema Maldonado-Meza; Carla Ivon Herrera-Najera; Carlos F. Arias; Celia Boukadida; Clara Esperanza Santacruz-Tinoco; Concepción Grajales-Muniz; Consorcio Mexicano de Vigilancia Genómica (CoViGen-Mex). Authors (in alphabetical order): Julio Elias Alvarado-Yaah; Fernando Fontove-Herrera; Francisco Pulido; Gloria Elena Espinoza-Ayala; Gloria María Molina-Salinas; Gloria Vazquez; Hector Esteban Paz-Juárez; Hector Montoya-Fuentes; Helen Haydee Fernanda Ramirez-Plascencia; Jorge Ivan Salinal-Navarez; Jose Antonio Enciso-Moreno; Jose Esteban Muñoz-Medina; Jose de Jesus Nunez-Contreras; Juan Bautista Chale-Dzul; Luis Alberto Ochoa-Carrera; Margarita Matias-Florentino; María Guadalupe Santiago-Mauricio; María Guadalupe de Jesus Mireles-Rivera; Nelly Sélem-Mojica; Pavel Isa; Ricardo Grande; Santiago Avila-Rios; Victor Hugo Borja-Aburto                                                                                                                                                                                                                                                                                                                                                                                                                                                                                                                                                                        |
| EPI_ISL_2442091, EPI_ISL_2442092, EPI_ISL_2442093, EPI_ISL_2442094, EPI_ISL_2442097                                                                                                                                                                                                                                                                                                                                    | Centro de Investigaçã em Saúde de Manhiça (CISM) & ISGlobal, Institut de Salut Global de Barcelona                                                                                                                  | Instituto de Biomedicina de València - CSIC                                                                                                                                                            | Alfredo Mayor; Arsenia Massinga; Inacio Mandomando; Irving Cancino; Ifaki Comas; Manoli Torres Puente; Santiago Jiménez-Serrano                                                                                                                                                                                                                                                                                                                                                                                                                                                                                                                                                                                                                                                                                                                                                                                                                                                                                                                                                                                                                                                                                                                                                                                                                                                                                                                                                                                                                                                                       |
| EPI_ISL_2620975                                                                                                                                                                                                                                                                                                                                                                                                        | Centrum Medycyny Klinicznej dr n.med. Karol Majewski - DiMedical                                                                                                                                                    | 1. Academic Center for Pathomorphological and Genetic-Molecular Diagnostics ltd, Białystok, Poland 2. National Institute of Public Health - National Institute of Hygiene, Warsaw, Poland              | Anetta Sulewska; Jacek Nikiłski; Janusz Dzięcioł; Joanna Kiśluk; Katarzyna Zacharczuk; Konrad Raczkowski; Magdalena Nowakowska; Małgorzata Sadkowska-Todys; Piotr Karabowicz; Piotr Majewski; Przemysław Bielek. Joanna Reszcę; Radosław Charkiewicz; Tomasz Wolkowicz                                                                                                                                                                                                                                                                                                                                                                                                                                                                                                                                                                                                                                                                                                                                                                                                                                                                                                                                                                                                                                                                                                                                                                                                                                                                                                                                |
| EPI_ISL_2523859                                                                                                                                                                                                                                                                                                                                                                                                        | City Hospital No 40                                                                                                                                                                                                 | WHO National Influenza Centre Russian Federation                                                                                                                                                       | Andrey Komissarov; Artem Fadeev; Daria Danilenko; Dmitry Lizonov; Elena Nabieva; Georgii Bazykin; Kirill Varchenko; Ksenia Safina; Kseniya Komissarova; Maria Pisareva; Maria Timofeeva; Mikhail Bakaev; Nikita Yolshin; Olga Shneider; Oula Mansour; Sergey Scherbak; Tamila Musaeva; Veronika Eder                                                                                                                                                                                                                                                                                                                                                                                                                                                                                                                                                                                                                                                                                                                                                                                                                                                                                                                                                                                                                                                                                                                                                                                                                                                                                                  |
| EPI_ISL_2617583                                                                                                                                                                                                                                                                                                                                                                                                        | City of Milwaukee Health Department Laboratory                                                                                                                                                                      | City of Milwaukee Health Department Laboratory                                                                                                                                                         | Amy Bauer; Jennifer Lentz; Manjeet Khubbar; Samantha Scott; Sanjib Bhattacharyya                                                                                                                                                                                                                                                                                                                                                                                                                                                                                                                                                                                                                                                                                                                                                                                                                                                                                                                                                                                                                                                                                                                                                                                                                                                                                                                                                                                                                                                                                                                      |
| EPI_ISL_2100243, EPI_ISL_2100244, EPI_ISL_2100245, EPI_ISL_2100246, EPI_ISL_2100247                                                                                                                                                                                                                                                                                                                                    | Clinical Hospital of Infectious and Tropical Diseases "Dr. Victor Babes"                                                                                                                                            | Cantacuzino Institute Virology                                                                                                                                                                         | Carmen Cherciu; Mihaela Lazar; Mihaela Oprea; Sorin Dinu                                                                                                                                                                                                                                                                                                                                                                                                                                                                                                                                                                                                                                                                                                                                                                                                                                                                                                                                                                                                                                                                                                                                                                                                                                                                                                                                                                                                                                                                                                                                              |

|                                                                                                                                                                                                                                                                                                                                                                                                                                                                                                                                                                                                                                                                                                                                                                         |                                                                                                                                                                                                                                                                                                                                                                                                                                                                                                                                                                                  |                                                                                                                                                                                                                                                                                                                                                                                                                                                                                                                                                              |                                                                                                                                                                                                                                                                                                                                                                                                                                                                                                                                                                                                                                                                                                                                                                                                                                                                                                                                                                                                                                                                                                                                                                                                                                                                                                                                                                                                                                                                                                                                                                                                                                                                          |
|-------------------------------------------------------------------------------------------------------------------------------------------------------------------------------------------------------------------------------------------------------------------------------------------------------------------------------------------------------------------------------------------------------------------------------------------------------------------------------------------------------------------------------------------------------------------------------------------------------------------------------------------------------------------------------------------------------------------------------------------------------------------------|----------------------------------------------------------------------------------------------------------------------------------------------------------------------------------------------------------------------------------------------------------------------------------------------------------------------------------------------------------------------------------------------------------------------------------------------------------------------------------------------------------------------------------------------------------------------------------|--------------------------------------------------------------------------------------------------------------------------------------------------------------------------------------------------------------------------------------------------------------------------------------------------------------------------------------------------------------------------------------------------------------------------------------------------------------------------------------------------------------------------------------------------------------|--------------------------------------------------------------------------------------------------------------------------------------------------------------------------------------------------------------------------------------------------------------------------------------------------------------------------------------------------------------------------------------------------------------------------------------------------------------------------------------------------------------------------------------------------------------------------------------------------------------------------------------------------------------------------------------------------------------------------------------------------------------------------------------------------------------------------------------------------------------------------------------------------------------------------------------------------------------------------------------------------------------------------------------------------------------------------------------------------------------------------------------------------------------------------------------------------------------------------------------------------------------------------------------------------------------------------------------------------------------------------------------------------------------------------------------------------------------------------------------------------------------------------------------------------------------------------------------------------------------------------------------------------------------------------|
| EPI_ISL_1965786,<br>EPI_ISL_2500703<br><br>EPI_ISL_1239194,<br>EPI_ISL_1968884,<br>EPI_ISL_2103718<br><br>EPI_ISL_877661<br>EPI_ISL_2608411<br>EPI_ISL_1748310, EPI_ISL_1833679, EPI_ISL_1993840, EPI_ISL_1993870, EPI_ISL_1993871, EPI_ISL_1993872, EPI_ISL_1993906, EPI_ISL_2484232<br>see above<br>EPI_ISL_2035560<br>EPI_ISL_2272780,<br>EPI_ISL_2272781,<br>EPI_ISL_2272783,<br>EPI_ISL_2272784,<br>EPI_ISL_2272785,<br>EPI_ISL_2272786<br>EPI_ISL_1534274<br>EPI_ISL_1539351, EPI_ISL_1539563, EPI_ISL_2195263, EPI_ISL_2309138, EPI_ISL_2309139, EPI_ISL_2309413, EPI_ISL_2309414, EPI_ISL_2310076, EPI_ISL_2310077, EPI_ISL_2310423, EPI_ISL_2310645, EPI_ISL_2311033<br>see above<br>EPI_ISL_1516188<br>EPI_ISL_2383896<br>EPI_ISL_1169510,<br>EPI_ISL_1169542 | Clinical Microbiology Laboratory, NewYork Presbyterian Hospital/Columbia University Irving Medical Center<br><br>Clinical Microbiology, Infection Prevention and Control<br><br>Clinical Molecular Microbiology Laboratory, UNC Hospital<br>Clinical Research Centre, Sarawak General Hospital<br>Clinical Virology<br>Clinical Virology<br>Clinical Hospital of Infectious and Tropical Diseases<br>"Dr. Victor Babes"<br><br>CoVid WC Garden Route<br>Colorado Department of Public Health and Environment<br>Commonwealth Healthcare Center<br>Commonwealth Healthcare Center | Uhlemann Laboratory, Columbia University Irving Medical Center<br><br>Section for Molecular Diagnostics<br><br>Dirk Dittmer<br>Institute of Health and Community Medicine<br>Clinical Bacteriology<br>Clinical Virology<br>Cantacuzino Institute Virology<br><br>NHLS/UCT<br>Colorado Department of Public Health and Environment<br>Centers for Disease Control and Prevention Division of Viral Diseases, Pathogen Discovery<br>Genomics and Discovery, Respiratory Viruses Branch, Division of Viral Diseases, Centers for Disease Control and Prevention | Angelica Juarez; Blossom Damania.; Brent A. Eason; Cameroon Grant; Carolina Caro-Vegas; Cecilia Thompson; Dirk Dittmer; Evelyn Hoffman; Jason Wong; Justin T. Landis; Linda Pluta; Melissa B. Miller; Patricio Cano; Razia Moorad<br>Chan Chia Jui; Chua Hock Hin; David Perera; Ooi Mong How; Tonni Sia Loong Loong; Wong Jyn Shan; Wong Kiing Aik<br><br>Adrian Egli; Alfredo Mari; Fanny Wegner; Hans Hirsch; Helena MB Seth-Smith; Julia Bielicki; Karoline Leuzinger; Madlen Stange; Manuel Battegay; Tim Roloff<br>Anissa Chouikha; Henda Triki; Kais Ghedira; Mariem Gdoura; Sondos Haddad; Wasfi Fares<br>Carmen Cherciu; Mihaela Lazar; Mihaela Oprea; Sorin Dinu; Usein Codruta<br><br>Arash Iranzadeh; Bruna Galvao; Carolyn Williamson; Deelan Doolabh; Diana Hardie; Innocent Mudau; Kruger Marais; Lynn Tyers; Marvin Hsiao; Stephen Korsman<br><br>Alexandria Rosshelm; Diana Ir; Emily A. Travanty; Laura Bankers; Molly C. Hetherington-Rauth; Sarah Elizabeth Totten; Shannon Ely; Shannon R. Matzinger<br>Alison Laufer Halpin; Ben L. Rambo-Martin; Clinton R. Paden; Dakota Howard; Darlene Wagner; Dave Wentworth; Dhvani Batra; Jasmine Padilla; Justin Lee; Katie Dillon; Krista Queen; Kristen Knipe; Kristine Lacek; Mark Burroughs; Matthew Scherer; Mili Sheth; Peter Cook; Sam Shepard; Sarah Nobles; Shoshona Le; Suxiang Tong; Vivien Dugan; Yvette Unoarumhi<br>Anna Montmayeur; Anna Uehara; Ben L. Rambo-Martin; Clinton R. Paden; Dhvani Batra; Haibin Wang; Jasmine Padilla; Jing Zhang; Justin Lee; Krista Queen; Lori Rowe; Mark Burroughs; Mili Sheth; Peter W. Cook; Rachel Marine; Sarah Nobles; Suxiang Tong; Yan Li; Ying Tao |
| EPI_ISL_729743,<br>EPI_ISL_729753<br><br>EPI_ISL_1017594<br>EPI_ISL_2496919, EPI_ISL_2496920, EPI_ISL_2496924, EPI_ISL_2496932, EPI_ISL_2496933, EPI_ISL_2496935, EPI_ISL_2496936, EPI_ISL_2496938, EPI_ISL_2496939, EPI_ISL_2496942, EPI_ISL_2497675, EPI_ISL_2497677, EPI_ISL_2497678, EPI_ISL_2497679, EPI_ISL_2497681<br>see above<br>EPI_ISL_1817707<br>EPI_ISL_2507131, EPI_ISL_2507150, EPI_ISL_2507152, EPI_ISL_2507163, EPI_ISL_2507197, EPI_ISL_2507199, EPI_ISL_2507231, EPI_ISL_2507356, EPI_ISL_2755034, EPI_ISL_2755117, EPI_ISL_2755119, EPI_ISL_2755122, EPI_ISL_2755176, EPI_ISL_2755181, EPI_ISL_2755207, EPI_ISL_2755788<br>see above<br>EPI_ISL_1446973                                                                                             | Connecticut Department of Health<br>Connecticut Veterans' Affairs Hospital<br>Contra Costa County Public Health Lab<br>Convillie CDC wc CVC<br>Curative Labs<br>DC Public Health Lab/ Dept. of Forensic Sciences                                                                                                                                                                                                                                                                                                                                                                 | Grubaugh Lab - Yale School of Public Health<br>Grubaugh Lab - Yale School of Public Health<br>Chan-Zuckerberg Biohub<br>NHLS/UCT<br>Curative Labs<br>Centers for Disease Control and Prevention Division of Viral Diseases, Pathogen Discovery<br>DC Public Health Lab/ Dept. of Forensic Sciences                                                                                                                                                                                                                                                           | Adam Moore; Akiko Iwasaki; Albert Ko; Alice Lu; Allison Nelson; Anderson Brito; Anne Wyllie; Annie Watkins; Arnao Casanovas; Catherine Muenker; Chaney Kalinich; Chantal Vogels; Charlese Dela Cruz; Isabel Ott; Joseph Fauver; Maria Tokuyama; Mary Petrone; Nathan Grubaugh; Patrick Wong; Peiwen Lu; Richard Martinello; Saad Omer; Shelli Farhadian; Tara Alpert<br>Chantal Vogels; Danielle Plank; Isabel Ott; Joseph Fauver; Mary Petrone; Nathan Grubaugh; Shaali Gupta; Tara Alpert<br><br>CZB Cliahub Consortium<br>Arash Iranzadeh; Bruna Galvao; Carolyn Williamson; Deelan Doolabh; Diana Hardie; Innocent Mudau; Kruger Marais; Lynn Tyers; Marvin Hsiao; Stephen Korsman<br>Elias L. Salfati; Eugenia Khorosheva; George Way; J.Cesar Ignacio-Espinoza; Janet Chen; Mikhail Hanewich-Hollatz; Nabjot Sandhu; Sophia Quasem; Vladimir Slepnev; Zhiyi Xie<br>Peter Cook; Sam Shepard; Sarah Nobles; Shoshona Le; Suxiang Tong; Vivien Dugan; Yvette Unoarumhi<br>Brittany Hamilton; Connie Maza; David Payne; Elizabeth Zelaya; Janis Doss; Jocelyn Hauser; Monica Mann; Sarah Scott; Scott Nguyen                                                                                                                                                                                                                                                                                                                                                                                                                                                                                                                                                           |
| EPI_ISL_1753005,<br>EPI_ISL_1819266,<br>EPI_ISL_2176248<br>EPI_ISL_2342558<br>EPI_ISL_1337507<br>EPI_ISL_1181690,<br>EPI_ISL_1181692<br>EPI_ISL_2592630, EPI_ISL_2593764, EPI_ISL_2595725, EPI_ISL_2595726, EPI_ISL_2595860, EPI_ISL_2596341, EPI_ISL_2596803, EPI_ISL_2597228, EPI_ISL_2597229, EPI_ISL_2597312<br>see above<br>EPI_ISL_593976<br>EPI_ISL_693708,<br>EPI_ISL_693711,<br>EPI_ISL_693750,<br>EPI_ISL_766979<br>EPI_ISL_2432518,<br>EPI_ISL_2432922,<br>EPI_ISL_2432953<br>EPI_ISL_1340751, EPI_ISL_1340752, EPI_ISL_1340753, EPI_ISL_1340754, EPI_ISL_1340756, EPI_ISL_1340759, EPI_ISL_1340761, EPI_ISL_1340764<br>see above                                                                                                                            | DNA Laboratories Sdn Bhd<br>DOHMH Corona<br>DPHL<br>DSMRC<br>Delaware Public Health Lab<br>Delaware Public Health Laboratory<br><br>Demy Health                                                                                                                                                                                                                                                                                                                                                                                                                                  | Malaysia Genome Institute<br>New York City Public Health Laboratory<br>Delaware Public Health Lab<br>DSMRC<br>Delaware Public Health Lab<br>Delaware Public Health Laboratory<br><br>National Reference Laboratory, Nigeria Centre for Disease Control<br>Laboratory of Respiratory Viruses and Measles, Oswaldo Cruz Institute, FIOCRUZ                                                                                                                                                                                                                     | Azrin Ahmad; Enizza Kasim; Irni Suhayu Sopian; Mohd Faizal Abu Bakar; Mohd Noor Mat Isa; Nor Afza Johari.; Nurhezreen Md Iqbal; Shamsidar Sopie; Siti Noraini Othman; Wong Yong Wee; Yusuf Muhammad Noor<br>Jade Wang; et al.<br>Gregory Hovan<br><br>Khine Zaw Oo; Ko Ko Lwin; Ko Ko Win; Kyee Myint; Nay Myo Aung; Pai Khant Kyaw; Phyo Kyaw Aung; Thet Wai Oo; Zaw Win Htun<br>Gregory Hovan<br>Gregory Hovan<br><br>Anthony Ahumibe; Catherine Okoi; Chimaobi Chukwu; Dr Chikwe Ihekweazu; Dr Ndodo Nnaemeka; Dr Omoare Adesuyi; Grace Esebanmen; Naidoo Dhamari; Nwando Mba; Olusola Anuoluwapo Akanbi                                                                                                                                                                                                                                                                                                                                                                                                                                                                                                                                                                                                                                                                                                                                                                                                                                                                                                                                                                                                                                                              |
| EPI_ISL_516923,<br>EPI_ISL_516924<br>EPI_ISL_632934<br><br>EPI_ISL_1280117,<br>EPI_ISL_1280147<br>EPI_ISL_417444<br>EPI_ISL_413020<br>EPI_ISL_447619,<br>EPI_ISL_534336,<br>EPI_ISL_740547,<br>EPI_ISL_1667471<br>EPI_ISL_648741,<br>EPI_ISL_648772                                                                                                                                                                                                                                                                                                                                                                                                                                                                                                                     | Department for Molecular Diagnostics, Centre for Medical Microbiology, Institute of Public Health of Montenegro<br>Department of Acute Infectious Diseases Control and Prevention,Yunnan Provincial Center for Disease Control and Prevention<br>Department of Genetics, Medirex<br>Department of Healthcare Biotechnology, National University of Sciences and Technology (NUST)<br>Department of Internal Medicine, Triemli Hospital<br>Department of Laboratory Medicine, National Taiwan University Hospital                                                                 | Charité Universitätsmedizin Berlin, Institut für Virologie<br>Department of Acute Infectious Diseases Control and Prevention,Yunnan Provincial Center for Disease Control and Prevention<br>Laboratory of Genomics and Bioinformatics, Comenius University Science Park<br>Department of Healthcare Biotechnology, National University of Sciences and Technology (NUST)<br>Institute of Medical Virology, University of Zurich<br>Microbial Genomics Core Lab, National Taiwan University Centers of Genomic and Precision Medicine                         | Barbara Muehleemann; Christian Drosten; Julia Schneider; Jörn Beheim-Schwarzbach; Marija Govedarica and Danijela Vujošević; Talitha Veith; Terry Jones; Victor M Corman<br><br>Jienan Zhou; Meiling Zhang; Senquan Jia; Xiaonan Zhao; Xiaoping Fu<br><br>Anna Gičová; Diana Rusňáková; Gabriel Minářík; Jaroslav Budiš; Miroslav Böhmer; Renáta Lukačková; Tatiana Sedláčková; Tomáš Szemes; Werner Krampfl<br>Corman; Ghani, E.; H.A.; Janjua; Javed, A.; Niazi; S.K.; Saqib, M.; V.M. and Zohaib, A.<br>Alexandra Trkola; Andrea Zbinden; Fiona Steiner; Gerhard Eich; Jon Huder; Jürg Böni; Maryam Zaheri; Michael Huber; Patrick Redli; Riccarda Capaul; Stefan Schmutz; Verena Kufner<br>Chiao-Ling Li; Pei-Jer Chen; Shan-Chwen Chang; Shiou-Hwei Yeh; Sui-Yuan Chang; Ya-Yun Lai; You-Yu Lin                                                                                                                                                                                                                                                                                                                                                                                                                                                                                                                                                                                                                                                                                                                                                                                                                                                                      |
| EPI_ISL_1919364,<br>EPI_ISL_2491497<br>EPI_ISL_977585<br>EPI_ISL_501208,<br>EPI_ISL_501227<br>EPI_ISL_512844<br>EPI_ISL_1495375,<br>EPI_ISL_1495382,<br>EPI_ISL_1495914<br>EPI_ISL_2099879,<br>EPI_ISL_2190101,<br>EPI_ISL_2190107,<br>EPI_ISL_2566446<br>EPI_ISL_2566461,<br>EPI_ISL_2566462,<br>EPI_ISL_2566463,<br>EPI_ISL_2566464                                                                                                                                                                                                                                                                                                                                                                                                                                   | Department of Medical Microbiology - section Molde, Molde Hospital<br>Department of Medical Microbiology, Hospital Pengajar Universiti Putra Malaysia<br>Department of Medical Microbiology, University Malaysia Medical Centre<br>Department of Medical Research<br>Department of Microbiology, University Innsbruck<br>Department of Public Health Bucharest<br>Department of Public Health Buzau                                                                                                                                                                              | Norwegian Institute of Public Health, Department of Virology<br>Malaysia Genome Institute<br>Department of Medical Microbiology, Faculty of Medicine, University of Malaya<br>DMR, Myanmar<br>Berghthaler laboratory, CeMM Research Center for Molecular Medicine of the Austrian Academy of Sciences<br>National Institute of Infectious Diseases-Prof. Dr. Matei Bals Molecular Diagnostics Laboratory<br>National Institute of Infectious Diseases-Prof. Dr. Matei Bals Molecular Diagnostics Laboratory                                                  | Atiya R Ali; Debech Nadia; Engebretsen Serina Beate; Garcia Llorente Ignacio; Hilde Elshaug; Hilde Volla; Jon Bråte; Kamilla Heddeland Instefjord; Karoline Bragstad; Kathrine Stene-Johansen; Line Victoria Moen; Marie Paulsen Madsen; Olav Hungenes; Pedersen Benedikte Nevjen; Rasmus Riis Kopperud<br>Avisha Richards; Azrin Ahmad; Enizza Kasim; Hui-Yee Chee; Irni Suhayu Sopian; Mohd Faizal Abu Bakar; Muhamad MI; Narcisse Joseph; Nor Afza Johari; Nor Zahrin Hasran; Nurhezreen Md Iqbal; Shamsidar Sopie; Siti Noraini Othman; Syafinaz Amin-Nordin; Yusuf Muhammad Noor<br>I-Ching SAM; Jennifer Chong; University Malaya Medical Centre COVID Team; Yoke Fun CHAN; Yoong Min CHONG<br>Aung Kyaw Kyaw; Aung Zaw Latt; Hlaing Myat Thu; Hnin Ohnmar Soe; Htin Lin; Kay Thi Aye; Lai Lai San; Myat Htut Nyunt; Nan Aye Thida Oo; Ni Ni Zau; Phyu Win Ei; Su Mon Win; Theingi Win Myat; Wah Wah Aung; Yi Yi Kyaw; Zaw Than Htun<br>Andreas Berghthaler; Anna Schedl; Bekir Erguner; Benedikt Agerer; Christoph Bock; Fabian Amman; Jan Laine; Lukas Endler; Maelle Le Moing; Martin Senekowitsch; Michael Schuster; Petr Triska; Thomas Penz<br><br>Andreea Tudor; Corina Casangiu; Dan Otelea; Leontina Banica; Marius Surleac; Ovidiu Vlaicu; Petre Milu; Robert Hohan; Simona Paraschiv<br><br>Corina Casangiu; Dan Otelea; Leontina Banica; Marius Surleac; Petre Milu; Robert Hohan; Simona Paraschiv                                                                                                                                                                                                                                                    |

|                                                                                                                                                                                                                                                                                                                                                                                                                                                                                                                                                                                                                                                                                                                                                                                                                                                                                                                                                                                                                                                                              |                                                                                                                                                                                          |                                                                                                                                                                                           |                                                                                                                                                                                                                                                                                                                                                                                                                                                                                                                                                                                                                                                                                                                                                                                                                                                                                                                                                                                |
|------------------------------------------------------------------------------------------------------------------------------------------------------------------------------------------------------------------------------------------------------------------------------------------------------------------------------------------------------------------------------------------------------------------------------------------------------------------------------------------------------------------------------------------------------------------------------------------------------------------------------------------------------------------------------------------------------------------------------------------------------------------------------------------------------------------------------------------------------------------------------------------------------------------------------------------------------------------------------------------------------------------------------------------------------------------------------|------------------------------------------------------------------------------------------------------------------------------------------------------------------------------------------|-------------------------------------------------------------------------------------------------------------------------------------------------------------------------------------------|--------------------------------------------------------------------------------------------------------------------------------------------------------------------------------------------------------------------------------------------------------------------------------------------------------------------------------------------------------------------------------------------------------------------------------------------------------------------------------------------------------------------------------------------------------------------------------------------------------------------------------------------------------------------------------------------------------------------------------------------------------------------------------------------------------------------------------------------------------------------------------------------------------------------------------------------------------------------------------|
| EPI_ISL_2324642                                                                                                                                                                                                                                                                                                                                                                                                                                                                                                                                                                                                                                                                                                                                                                                                                                                                                                                                                                                                                                                              | Department of Public Health Microbiology Ljubljana, National Laboratory for Health, Environment and Food                                                                                 | Department of Public Health Microbiology Ljubljana, National Laboratory for Health, Environment and Food                                                                                  | José Gonçalves; Katarina Prosenec; Marija Trkov; Martin Bosilj; Metka Paragi; Tom Koritnik; Verica Mioč                                                                                                                                                                                                                                                                                                                                                                                                                                                                                                                                                                                                                                                                                                                                                                                                                                                                        |
| EPI_ISL_582513                                                                                                                                                                                                                                                                                                                                                                                                                                                                                                                                                                                                                                                                                                                                                                                                                                                                                                                                                                                                                                                               | Department of Respiratory and other Viral Infections of L.V.Gromashevsky Institute of Epidemiology & Infectious Diseases NAMS of Ukraine                                                 | Department of Respiratory and other Viral Infections of L.V.Gromashevsky Institute of Epidemiology & Infectious Diseases NAMS of Ukraine, JSC "Farmak"                                    | Alla Mironenko; Andriy Goy; Ihor Kravchuk; Larysa Radchenko; Ludmyla Bolotova; Nataliai Teteriuk                                                                                                                                                                                                                                                                                                                                                                                                                                                                                                                                                                                                                                                                                                                                                                                                                                                                               |
| EPI_ISL_732955                                                                                                                                                                                                                                                                                                                                                                                                                                                                                                                                                                                                                                                                                                                                                                                                                                                                                                                                                                                                                                                               | Department of Tropical Parasitology                                                                                                                                                      | Laboratory of Recombinant Vaccines                                                                                                                                                        | Boguslaw Szewczyk; Kirsi Aaltonen; Lukaszb Rabalski; Maciej Grzybek; Maciej Kosinski; Ravi Kant; Tarja Sironen; Teemu Smura                                                                                                                                                                                                                                                                                                                                                                                                                                                                                                                                                                                                                                                                                                                                                                                                                                                    |
| EPI_ISL_1385791, EPI_ISL_1385808, EPI_ISL_1397958, EPI_ISL_1406393, EPI_ISL_1406394, EPI_ISL_1732274, EPI_ISL_2313099, EPI_ISL_2314185, EPI_ISL_2348666                                                                                                                                                                                                                                                                                                                                                                                                                                                                                                                                                                                                                                                                                                                                                                                                                                                                                                                      | see above                                                                                                                                                                                | Department of Virology                                                                                                                                                                    | Aamer Ikram; Abdul Ahad; Adnan Haider; Ammar Amjad; Austin Leach; Joel Montgomery; John Klena; Ketan Patel; Massab Umair; Melissa Mobley; Muhammad Ammar; Muhammad Salman; Nazish Badar; Qasim Ali; Sana Tamim; Shannon Whitmer; Syed Adnan Haider; Zaira Rehman                                                                                                                                                                                                                                                                                                                                                                                                                                                                                                                                                                                                                                                                                                               |
| EPI_ISL_1819493                                                                                                                                                                                                                                                                                                                                                                                                                                                                                                                                                                                                                                                                                                                                                                                                                                                                                                                                                                                                                                                              | Dept. of Medical Microbiology, Stavanger University Hospital, Helse Stavanger HF                                                                                                         | Norwegian Institute of Public Health, Department of Virology                                                                                                                              | Atiya R Ali; Debech Nadia; Engebretsen Serina Beate; Garcia Llorente Ignacio; Hilde Elshaug; Hilde Vollan; Jon Bråte; Kamilla Heddeland Instefjord; Karoline Bragstad; Kathrine Stene-Johansen; Marie Paulsen Madsen; Olav Hungnes; Pedersen Benedikte Nevjen; Rasmus Riis Kopperud                                                                                                                                                                                                                                                                                                                                                                                                                                                                                                                                                                                                                                                                                            |
| EPI_ISL_1118155, EPI_ISL_1322310, EPI_ISL_1994923, EPI_ISL_1994941, EPI_ISL_2566936, EPI_ISL_2566953                                                                                                                                                                                                                                                                                                                                                                                                                                                                                                                                                                                                                                                                                                                                                                                                                                                                                                                                                                         | see above                                                                                                                                                                                | Dept. of Microbiology and Infection Control, Akershus University Hospital HF                                                                                                              | Alexander Hesselberg Løvestad; Hege Vangstein Aamot                                                                                                                                                                                                                                                                                                                                                                                                                                                                                                                                                                                                                                                                                                                                                                                                                                                                                                                            |
| EPI_ISL_2171041, EPI_ISL_2171281                                                                                                                                                                                                                                                                                                                                                                                                                                                                                                                                                                                                                                                                                                                                                                                                                                                                                                                                                                                                                                             | Dhulikhel Hospital, Kathmandu University Hospital                                                                                                                                        | Molecular and Genomics Research Lab, Dhulikhel Hospital, Kathmandu University Hospital                                                                                                    | Dipesh Tamrakar; Manu Vanaerschot; Meghnath Dhimai; Navin Adhikari; Nishan Katuwal; Pradip Gyanwali; Rajeev Shrestha; Saroj Bhattarai; Surendra Kumar Madhup                                                                                                                                                                                                                                                                                                                                                                                                                                                                                                                                                                                                                                                                                                                                                                                                                   |
| EPI_ISL_2246972                                                                                                                                                                                                                                                                                                                                                                                                                                                                                                                                                                                                                                                                                                                                                                                                                                                                                                                                                                                                                                                              | Diagnostyka Sp. Z o.o.                                                                                                                                                                   | 1. Academic Center for Pathomorphological and Genetic-Molecular Diagnostics Ltd, Białystok, Poland 2. National Institute of Public Health - National Institute of Hygiene, Warsaw, Poland | Anetta Sulewska; Jacek Nikiłski; Janusz Dzięcioł; Joanna Kiśluk; Katarzyna Zacharczuk; Konrad Raczkowski; Magdalena Nowakowska; Małgorzata Sadkowska-Todys; Piotr Karabowicz; Piotr Majewski; Przemysław Bieчек Joanna Reszcę; Radosław Charkiewicz; Tomasz Wolkowicz                                                                                                                                                                                                                                                                                                                                                                                                                                                                                                                                                                                                                                                                                                          |
| EPI_ISL_2319093                                                                                                                                                                                                                                                                                                                                                                                                                                                                                                                                                                                                                                                                                                                                                                                                                                                                                                                                                                                                                                                              | Diagnostyka. Laboratoria Medyczne.                                                                                                                                                       | 1. ViroGenetics - BSL3 Laboratory of Virology, Malopolska Centre of Biotechnology, Jagiellonian University; 2. genXone SA, Research & Development Laboratory                              | Brylak A; Drweska-Matelska N; Gidlewicz A; Grabowski J; Gromowski, T.; Januszczak S; Kaszuba M; Kowalski, M.; Krych L; Labaj; Mazur-Panaslук, N.; Nowicki G; P.P.; Pyrc, K.; Sykulski M; Szeszko K; Szulc, P.; Wydmanski W.                                                                                                                                                                                                                                                                                                                                                                                                                                                                                                                                                                                                                                                                                                                                                    |
| EPI_ISL_747302, EPI_ISL_747312, EPI_ISL_747319, EPI_ISL_747349, EPI_ISL_747399, EPI_ISL_850183, EPI_ISL_850188, EPI_ISL_959500, EPI_ISL_1138940, EPI_ISL_1138975, EPI_ISL_1252440, EPI_ISL_1319005, EPI_ISL_1489580, EPI_ISL_1489958, EPI_ISL_1490143, EPI_ISL_1936604, EPI_ISL_2332276, EPI_ISL_2332456, EPI_ISL_2332565, EPI_ISL_2361252, EPI_ISL_2464316, EPI_ISL_2464341,                                                                                                                                                                                                                                                                                                                                                                                                                                                                                                                                                                                                                                                                                                | see above                                                                                                                                                                                | Division of Emerging Infectious Diseases, Bureau of Infectious Diseases Diagnosis Control, Korea Disease Control and Prevention Agency                                                    | Ae Kyung Park; Chae Young Lee; Chaeyoung Lee; Eun-Jin Kim; Heul Man Kim; Il-Hwan Kim; Jeong-Ah Kim; Jeong-Ah Kimg; Jeong-Min Kim; Jin Sun No; Namjoo Lee; Sang Hee Woo                                                                                                                                                                                                                                                                                                                                                                                                                                                                                                                                                                                                                                                                                                                                                                                                         |
| EPI_ISL_2104744                                                                                                                                                                                                                                                                                                                                                                                                                                                                                                                                                                                                                                                                                                                                                                                                                                                                                                                                                                                                                                                              | Division of Epidemiology                                                                                                                                                                 | COVID-19 Network Investigations (CONI) Alliance                                                                                                                                           | Angkana Huang; Anthony R. Jones; Arporn Wangwiwatsin; Arthicha Wongkumma; Bhakbhoom Panthan; Chonticha Klungtong; Duangkamon Loesbanluetchai; Ekawat Pasomsub; Elizabeth Batty; Insee Semsorn; Janjira Thaipadungpanit; Kawinna Kerdsalung; Khajohn Joonlasak; Kingkan Rakmanee; Krittikorn Kumpornsin; Namfon Kotanan; Pantila Taweewiyakarn; Prangsiri Nalaeam; Stefan Fernandes; Thanat Chookajorn; Theerarat Kochakarn; Treewat Watthanachockchai; Wasun Chantratita; Wudtichai Manasatienkij                                                                                                                                                                                                                                                                                                                                                                                                                                                                              |
| EPI_ISL_412871, EPI_ISL_481378, EPI_ISL_498045, EPI_ISL_510590, EPI_ISL_515037                                                                                                                                                                                                                                                                                                                                                                                                                                                                                                                                                                                                                                                                                                                                                                                                                                                                                                                                                                                               | Division of Viral Diseases, Center for Laboratory Control of Infectious Diseases, Korea Centers for Diseases Control and Prevention                                                      | Division of Viral Diseases, Center for Laboratory Control of Infectious Diseases, Korea Centers for Diseases Control and Prevention                                                       | Daesang Lee; Dong Hyun Song; Heul Man Kim; Hye-Jun Jo; Jeong-Min Kim; Jun-Sub Kim; Mi-Seon Kim; Myung Guk Han; Namjoo Lee; Sang Hee Woo; Sehee Park; Seong Tae Jeong; Yoon-Seok Chung                                                                                                                                                                                                                                                                                                                                                                                                                                                                                                                                                                                                                                                                                                                                                                                          |
| EPI_ISL_523211, EPI_ISL_578032, EPI_ISL_632485, EPI_ISL_722275, EPI_ISL_2145143, EPI_ISL_2145682, EPI_ISL_2145703, EPI_ISL_2145782, EPI_ISL_2449950, EPI_ISL_2449965, EPI_ISL_2449966, EPI_ISL_2449987, EPI_ISL_2449988, EPI_ISL_2449989, EPI_ISL_2483493                                                                                                                                                                                                                                                                                                                                                                                                                                                                                                                                                                                                                                                                                                                                                                                                                    | see above                                                                                                                                                                                | Dutch COVID-19 response team                                                                                                                                                              | Erasmus Medical Center                                                                                                                                                                                                                                                                                                                                                                                                                                                                                                                                                                                                                                                                                                                                                                                                                                                                                                                                                         |
| EPI_ISL_1158773, EPI_ISL_1443459                                                                                                                                                                                                                                                                                                                                                                                                                                                                                                                                                                                                                                                                                                                                                                                                                                                                                                                                                                                                                                             | Dutch COVID-19 response team                                                                                                                                                             | Medical Microbiology, Maastricht University Medical Centre                                                                                                                                | Brian van der Veer*; Carmen Reumkens; Christian Hoebe; Erik Beuken; Jozef Dingemans*; Lieke van Alphen; Paul Savelkoul                                                                                                                                                                                                                                                                                                                                                                                                                                                                                                                                                                                                                                                                                                                                                                                                                                                         |
| EPI_ISL_943476, EPI_ISL_1013678, EPI_ISL_1035238, EPI_ISL_1089880, EPI_ISL_1165369, EPI_ISL_1232400, EPI_ISL_1287892, EPI_ISL_1289068, EPI_ISL_1370844, EPI_ISL_1456826, EPI_ISL_1520479, EPI_ISL_1520505, EPI_ISL_1521321, EPI_ISL_1522126, EPI_ISL_1522182, EPI_ISL_1522200, EPI_ISL_1522201, EPI_ISL_1522203, EPI_ISL_1522208, EPI_ISL_1522215, EPI_ISL_1522218, EPI_ISL_1595932, EPI_ISL_1596275, EPI_ISL_1596475, EPI_ISL_1596975, EPI_ISL_17051429, EPI_ISL_17051535, EPI_ISL_1705811, EPI_ISL_1792906, EPI_ISL_1792964, EPI_ISL_1792965, EPI_ISL_1962966, EPI_ISL_2094189, EPI_ISL_2094352, EPI_ISL_2094353, EPI_ISL_2094386, EPI_ISL_2094388, EPI_ISL_2094389, EPI_ISL_2094390, EPI_ISL_2094391, EPI_ISL_2094392, EPI_ISL_2094393, EPI_ISL_2215916, EPI_ISL_2216012, EPI_ISL_2220505, EPI_ISL_2220507, EPI_ISL_2220513, EPI_ISL_2220518, EPI_ISL_2303627, EPI_ISL_2303975, EPI_ISL_2303978, EPI_ISL_2405837, EPI_ISL_2474331, EPI_ISL_2476316, EPI_ISL_2610513, EPI_ISL_2610913, EPI_ISL_2610918, EPI_ISL_2673172, EPI_ISL_2673388, EPI_ISL_2788294, EPI_ISL_2788315 | see above                                                                                                                                                                                | Dutch COVID-19 response team                                                                                                                                                              | National Institute for Public Health and the Environment (RIVM)                                                                                                                                                                                                                                                                                                                                                                                                                                                                                                                                                                                                                                                                                                                                                                                                                                                                                                                |
| EPI_ISL_1915786, EPI_ISL_1915787                                                                                                                                                                                                                                                                                                                                                                                                                                                                                                                                                                                                                                                                                                                                                                                                                                                                                                                                                                                                                                             | EHA Clinics                                                                                                                                                                              | National Reference Laboratory, Nigeria Centre for Disease Control                                                                                                                         | Anthony Ahumibe; Catherine Oki; Chimaobi Chukwu; Dr Chikwe Ihekweazu; Dr Ndodo Nnaemeka; Dr Omoare Adesuyi; Grace Esebanmen; Naidoo Dhamari; Nwando Mba; Olusola Anuloluwapo Akanbi                                                                                                                                                                                                                                                                                                                                                                                                                                                                                                                                                                                                                                                                                                                                                                                            |
| EPI_ISL_1913220, EPI_ISL_1913224                                                                                                                                                                                                                                                                                                                                                                                                                                                                                                                                                                                                                                                                                                                                                                                                                                                                                                                                                                                                                                             | EL CAMINO HOSPITAL                                                                                                                                                                       | Santa Clara County public Health Laboratory                                                                                                                                               | Santa Clara County Public Health Department                                                                                                                                                                                                                                                                                                                                                                                                                                                                                                                                                                                                                                                                                                                                                                                                                                                                                                                                    |
| EPI_ISL_1812276, EPI_ISL_1815579                                                                                                                                                                                                                                                                                                                                                                                                                                                                                                                                                                                                                                                                                                                                                                                                                                                                                                                                                                                                                                             | EXCITE Lab                                                                                                                                                                               | Andersen lab at Scripps Research                                                                                                                                                          | Alexandre Bolze; Alice Summerfield; Celena Andrade; Charlotte Rivera-Garcia; David Becker; Efrén Sandoval; Elizabeth Cirulli; Francisco Tanudjaja; Geraint Levan; James Lu + SEARCH; Jason Nguyen; Jimmy Ramirez; Kelly Schiabor Barrett; Magnus Isaksson; Marc Laurent; Nicole L Washington; Ryan Cho; Sherry Wang; Simon White; Tyler Cassens; William Lee                                                                                                                                                                                                                                                                                                                                                                                                                                                                                                                                                                                                                   |
| EPI_ISL_2659068, EPI_ISL_2659069, EPI_ISL_2659070                                                                                                                                                                                                                                                                                                                                                                                                                                                                                                                                                                                                                                                                                                                                                                                                                                                                                                                                                                                                                            | El Camino Hospital                                                                                                                                                                       | Santa Clara County Public Health Laboratory                                                                                                                                               | Santa Clara County Public Health Department                                                                                                                                                                                                                                                                                                                                                                                                                                                                                                                                                                                                                                                                                                                                                                                                                                                                                                                                    |
| EPI_ISL_1824117, EPI_ISL_1824118                                                                                                                                                                                                                                                                                                                                                                                                                                                                                                                                                                                                                                                                                                                                                                                                                                                                                                                                                                                                                                             | El Camino Hospital                                                                                                                                                                       | Santa Clara County public Health Laboratory                                                                                                                                               | Santa Clara County Public Health Department                                                                                                                                                                                                                                                                                                                                                                                                                                                                                                                                                                                                                                                                                                                                                                                                                                                                                                                                    |
| EPI_ISL_2321503                                                                                                                                                                                                                                                                                                                                                                                                                                                                                                                                                                                                                                                                                                                                                                                                                                                                                                                                                                                                                                                              | Emory University                                                                                                                                                                         | Centers for Disease Control and Prevention Division of Viral Diseases, Pathogen Discovery                                                                                                 | Alison Laufer Halpin; Ben L. Rambo-Martin; Clinton R. Paden; Dakota Howard; Darlene Wagner; Dave Wentworth; Dhvani Batra; Jasmine Padilla; Justin Lee; Katie Dillon; Krista Queen; Kristen Kripe; Kristine Lacke; Mark Burroughs; Matthew Scherer; Mili Sheth; Peter Cook; Sam Shepard; Sarah Nobles; Shoshona Lee; Suxiang Tong; Vivien Dugan; Yvette Unarumhi                                                                                                                                                                                                                                                                                                                                                                                                                                                                                                                                                                                                                |
| EPI_ISL_2135484                                                                                                                                                                                                                                                                                                                                                                                                                                                                                                                                                                                                                                                                                                                                                                                                                                                                                                                                                                                                                                                              | Epimol - Molecular Epidemiology Group (UV-FISABIO)                                                                                                                                       | SeqCOVID-SPAIN consortium/BV(CSIC)                                                                                                                                                        | Maria Alma Bracho and SeqCOVID-SPAIN consortium                                                                                                                                                                                                                                                                                                                                                                                                                                                                                                                                                                                                                                                                                                                                                                                                                                                                                                                                |
| EPI_ISL_883245, EPI_ISL_883825, EPI_ISL_1097646, EPI_ISL_1404993                                                                                                                                                                                                                                                                                                                                                                                                                                                                                                                                                                                                                                                                                                                                                                                                                                                                                                                                                                                                             | Eurofins Diatherix                                                                                                                                                                       | Hudsonalpha Genome Sequencing Center                                                                                                                                                      | Ada Stewart; Jane Grimwood; Jenell Webber; Jennifer Cart; John Lovell; Joshua Stough; Leslie Malone; Lori H. Handley; Melissa Williams; Stefan Brzezinski; Teresa Jones; and Jeremy Schmutz                                                                                                                                                                                                                                                                                                                                                                                                                                                                                                                                                                                                                                                                                                                                                                                    |
| EPI_ISL_419560                                                                                                                                                                                                                                                                                                                                                                                                                                                                                                                                                                                                                                                                                                                                                                                                                                                                                                                                                                                                                                                               | FL Bureau of Public Health Laboratories-Tampa                                                                                                                                            | Pathogen Discovery, Respiratory Viruses Branch, Division of Viral Diseases, Centers for Disease Control and Prevention                                                                    | Anna Uehara; Clinton R. Paden; Haibin Wang; Jasmine Padilla; Jing Zhang; Justin Lee; Krista Queen; Suxiang Tong; Yan Li; Ying Tao                                                                                                                                                                                                                                                                                                                                                                                                                                                                                                                                                                                                                                                                                                                                                                                                                                              |
| EPI_ISL_1545668                                                                                                                                                                                                                                                                                                                                                                                                                                                                                                                                                                                                                                                                                                                                                                                                                                                                                                                                                                                                                                                              | Faculty of Medicine Vajira Hospital                                                                                                                                                      | COVID-19 Network Investigations (CONI) Alliance                                                                                                                                           | Ampan Vimonvattana; Anan Manomaipliboon; Angkana Huang; Anthony R. Jones; Arporn Wangwiwatsin; Bhakbhoom Panthan; Chayanit Phutthanu; Chonticha Klungtong; Duangkamon Loesbanluetchai; Ekawat Pasomsub; Elizabeth Batty; Insee Semsorn; Jakravoot Maneerit; Janjira Thaipadungpanit; Khajohn Joonlasak; Kingkan Rakmanee; Krittikorn Kumpornsin; Namfon Kotanan; Stefan Fernandez; Sunisa Dongphooay; Thanat Chookajorn; Theerarat Kochakarn; Tonsan Hansirisathit; Treewat Watthanachockchai; Uraporn Phumisantiphong; Wasun Chantratita; Wipawee Thongsopa; Wudtichai Manasatienkij                                                                                                                                                                                                                                                                                                                                                                                          |
| EPI_ISL_1273102                                                                                                                                                                                                                                                                                                                                                                                                                                                                                                                                                                                                                                                                                                                                                                                                                                                                                                                                                                                                                                                              | Faculty of Medicine, Al-Quds University                                                                                                                                                  | Faculty of Medicine, Al-Quds University                                                                                                                                                   | Al-Jawabreh, A.; Dumaidi, K.; Ereqat, S.; Nasereddin, A.                                                                                                                                                                                                                                                                                                                                                                                                                                                                                                                                                                                                                                                                                                                                                                                                                                                                                                                       |
| EPI_ISL_203264, EPI_ISL_2038893                                                                                                                                                                                                                                                                                                                                                                                                                                                                                                                                                                                                                                                                                                                                                                                                                                                                                                                                                                                                                                              | Federal Budget Health Care Institution "Center of Hygiene and Epidemiology in Tver region"                                                                                               | Group of Genomics and Postgenomic Technologies of Central Research Institute of Epidemiology                                                                                              | Akimkin VG; Kaptelova VV; Kondrasheva LY; Korneenko EV; Melushenkova TG; Nadtoka MI; Saenko SS; Samoilov AE; Smirnova YS; Speranskaya AS; Tivanova EV                                                                                                                                                                                                                                                                                                                                                                                                                                                                                                                                                                                                                                                                                                                                                                                                                          |
| EPI_ISL_1859607                                                                                                                                                                                                                                                                                                                                                                                                                                                                                                                                                                                                                                                                                                                                                                                                                                                                                                                                                                                                                                                              | Federal State Budgetary Educational Institution of Higher Education B«Privolzhsky Research Medical University»B of the Ministry of Health of the Russian Federation, Academic Consortium | FEDERAL RESEARCH AND CLINICAL CENTER OF PHYSICAL-CHEMICAL MEDICINE OF FEDERAL MEDICAL BIOLOGICAL AGENCY, Academic Consortium                                                              | Alexander Manolov; Alexander Pavlenko; Alexander Rumyantsev; Alexander Samoilov; Alexander Troitsky; Alexander Tulichev; Alexander Vasiliev; Alexey Volnukhin; Alla Petrova; Andrey Koritsky; Anna Blagonravova; Anna Varizhuk; Daria Boldyreva; Daria Khariampieva; Daria Matyushkina; Dmitry Fedorov; Dmitry Pushkar; Ekaterina Moskaleva; Elena Galova; Elena Ilina; Elizaveta Orlova; Galina Trifonova; Gaukhar Yusubalieva; Ilshat Gafurov; Irina Shirokova; Konstantin Ivanov; Konstantin Kolontarev; Ksenia Klimina; Larisa Balykova; Lyubov Rychkova; Nadezhda Kolyshkina; Natalia Pozhenko; Oleg Ogarkov; Pavel Bashkirov; Polina Khromova; Polina Tikhonova; Ramiz Bakhteyev; Raushaniya Gafullina; Sergey Rumyantsev; Svetlana Solovieva; Vadim Govorun; Valentin Manuvera; Varvara Musarova; Vasily Lazarev; Vladimir Baklaushev; Vladimir Rumyantsev; Vladimir Vesevolov; Vladislav Babenko; Vyacheslav Kurapatkin; Vyacheslav Sirkov; Yulia Galeeva; Yuri Udalov |
| EPI_ISL_2558053, EPI_ISL_2558057                                                                                                                                                                                                                                                                                                                                                                                                                                                                                                                                                                                                                                                                                                                                                                                                                                                                                                                                                                                                                                             | First Aide Diagnostic Center                                                                                                                                                             | Philippine Genome Center                                                                                                                                                                  | Alethea R. de Guzman; Anna Ong-Lim; Arianne A. Zamora; Asia Louisa U. Chong; Benedict A. Maralit; Candice Francheska B. Tambaaoan; Carlo M. Lapid; Elcia Carlos; Devon Ray Pacial; Edsel Maurice Salvaña; El King D. Morado; Elcid Aaron R. Pangilinan; Eva Maria Cutiongo-de la Paz; Francis A. Tablizo; Irish Coleen A. Asin; Jaime C. Montoya; Jan Michael C. Yap; Jo-Hannah S. Llamas; John Q. Wong; Joshua Gregor A. Dizon; Juan Antonio R. Magalang; Karol Sophia Agape R. Padilla; Kenneth M. Kim; Kris P. Punayan; Marc Edsel C. Ayes; Maria Rosario Singh-Vergeire and Cynthia P. Saloma; Maria Sofia L. Yangzon; Marissa Alejandra; Razel Nikka M. Hao; Renato Jacinto Q. Mantaring; Rianna Patricia S. Cruz; Sheila Mae M. Araiza                                                                                                                                                                                                                                   |
| EPI_ISL_508720, EPI_ISL_1674735, EPI_ISL_2008869, EPI_ISL_2230013, EPI_ISL_2246887, EPI_ISL_2246888, EPI_ISL_2246889                                                                                                                                                                                                                                                                                                                                                                                                                                                                                                                                                                                                                                                                                                                                                                                                                                                                                                                                                         | see above                                                                                                                                                                                | Florida Bureau of Public Health Laboratories                                                                                                                                              | Florida Bureau of Public Health Laboratories                                                                                                                                                                                                                                                                                                                                                                                                                                                                                                                                                                                                                                                                                                                                                                                                                                                                                                                                   |
| EPI_ISL_476139                                                                                                                                                                                                                                                                                                                                                                                                                                                                                                                                                                                                                                                                                                                                                                                                                                                                                                                                                                                                                                                               | Folkhalsomyndigheten                                                                                                                                                                     | The Public Health Agency of Sweden                                                                                                                                                        | Anna Blanton; Sarah Schmedes                                                                                                                                                                                                                                                                                                                                                                                                                                                                                                                                                                                                                                                                                                                                                                                                                                                                                                                                                   |
| EPI_ISL_1557163, EPI_ISL_1614854, EPI_ISL_1666166, EPI_ISL_1666372, EPI_ISL_1666373, EPI_ISL_1666377, EPI_ISL_1666379, EPI_ISL_1666384, EPI_ISL_1666437, EPI_ISL_1666438, EPI_ISL_1666447, EPI_ISL_1666495, EPI_ISL_1667140, EPI_ISL_1667173, EPI_ISL_1667317, EPI_ISL_1667332, EPI_ISL_1667390, EPI_ISL_1839105, EPI_ISL_1839106, EPI_ISL_1839341, EPI_ISL_1839348, EPI_ISL_1839441, EPI_ISL_1839578, EPI_ISL_1839605, EPI_ISL_1839969, EPI_ISL_1840029, EPI_ISL_1840145, EPI_ISL_1992039, EPI_ISL_1992110, EPI_ISL_1992125, EPI_ISL_1992133, EPI_ISL_1992137, EPI_ISL_1992142, EPI_ISL_1992240, EPI_ISL_1992245, EPI_ISL_1992246, EPI_ISL_1992270, EPI_ISL_1992272, EPI_ISL_1992277, EPI_ISL_1992305, EPI_ISL_1992306, EPI_ISL_1993113, EPI_ISL_1993142, EPI_ISL_1993160, EPI_ISL_1993261, EPI_ISL_1993163, EPI_ISL_1993295, EPI_ISL_1993297, EPI_ISL_2038558, EPI_ISL_2038729, EPI_ISL_2038753, EPI_ISL_2043610, EPI_ISL_2043635,                                                                                                                                         | see above                                                                                                                                                                                | Folkhalsomyndigheten                                                                                                                                                                      | Anna Risberg; Anna-Malin Linde; Karin Tegmark-Wisell; Maria Lind Karlberg; Mattias Haukland; Olov Svartstrom; Oskar Karlsson Lindsjo; Petra Edquist; Reza Advani; Sandra Broddesson; Shamam Muradrasoli                                                                                                                                                                                                                                                                                                                                                                                                                                                                                                                                                                                                                                                                                                                                                                        |
| EPI_ISL_2043905, EPI_ISL_2043918, EPI_ISL_2134475, EPI_ISL_2134533, EPI_ISL_2134535, EPI_ISL_2480006, EPI_ISL_2480014, EPI_ISL_2525759, EPI_ISL_2525769, EPI_ISL_2598756, EPI_ISL_2598771, EPI_ISL_2686716                                                                                                                                                                                                                                                                                                                                                                                                                                                                                                                                                                                                                                                                                                                                                                                                                                                                   | see above                                                                                                                                                                                | Fulgent Genetics                                                                                                                                                                          | Centers for Disease Control and Prevention Division of Viral Diseases, Pathogen Discovery                                                                                                                                                                                                                                                                                                                                                                                                                                                                                                                                                                                                                                                                                                                                                                                                                                                                                      |
| EPI_ISL_1232130, EPI_ISL_19377710                                                                                                                                                                                                                                                                                                                                                                                                                                                                                                                                                                                                                                                                                                                                                                                                                                                                                                                                                                                                                                            | Fulgent Genetics                                                                                                                                                                         | Fulgent Genetics                                                                                                                                                                          | Becky Tsai; Benafsh Sapra; Doreen Ng; Harry Gao; James Xie; John Gao; Joseph Fierro; Mickey Li; Yan Meng                                                                                                                                                                                                                                                                                                                                                                                                                                                                                                                                                                                                                                                                                                                                                                                                                                                                       |
| EPI_ISL_1110540,                                                                                                                                                                                                                                                                                                                                                                                                                                                                                                                                                                                                                                                                                                                                                                                                                                                                                                                                                                                                                                                             | Furst Medical Laboratory                                                                                                                                                                 | Norwegian Institute of Public Health, Department of Virology                                                                                                                              | *Kathrine Stene-Johansen; Atiya R Ali; Debech Nadia; Engebretsen Serina Beate; Garcia Llorente Ignacio; Hilde Elshaug; Hilde Vollan; Jon Bråte; Kamilla Heddeland Instefjord; Karoline Bragstad; Kathrine Stene-Johansen; Line Victoria Moen; Marie Paulsen                                                                                                                                                                                                                                                                                                                                                                                                                                                                                                                                                                                                                                                                                                                    |

|                                                                                                                                                                                                                                                                                                                                                                                                                                                                                                                                                                                                                                                                                                                                                                                                                                                                                                                                                                                                                                                                                                                                                                                                                                                                                                                                                                                                                                 |                                                                                                                   |                                                                                                                                                                                                                                                                                                                                                                                                                                                                                                                                                                                                                                                                                                                                                                             |                                                                                                                                                                                                                                                                                                                                                                                                                                                                                                                                                                                                                                                                                                               |                                                                                           |
|---------------------------------------------------------------------------------------------------------------------------------------------------------------------------------------------------------------------------------------------------------------------------------------------------------------------------------------------------------------------------------------------------------------------------------------------------------------------------------------------------------------------------------------------------------------------------------------------------------------------------------------------------------------------------------------------------------------------------------------------------------------------------------------------------------------------------------------------------------------------------------------------------------------------------------------------------------------------------------------------------------------------------------------------------------------------------------------------------------------------------------------------------------------------------------------------------------------------------------------------------------------------------------------------------------------------------------------------------------------------------------------------------------------------------------|-------------------------------------------------------------------------------------------------------------------|-----------------------------------------------------------------------------------------------------------------------------------------------------------------------------------------------------------------------------------------------------------------------------------------------------------------------------------------------------------------------------------------------------------------------------------------------------------------------------------------------------------------------------------------------------------------------------------------------------------------------------------------------------------------------------------------------------------------------------------------------------------------------------|---------------------------------------------------------------------------------------------------------------------------------------------------------------------------------------------------------------------------------------------------------------------------------------------------------------------------------------------------------------------------------------------------------------------------------------------------------------------------------------------------------------------------------------------------------------------------------------------------------------------------------------------------------------------------------------------------------------|-------------------------------------------------------------------------------------------|
| EPI_ISL_1317425, EPI_ISL_1578753, EPI_ISL_1578825, EPI_ISL_1994063, EPI_ISL_2333503                                                                                                                                                                                                                                                                                                                                                                                                                                                                                                                                                                                                                                                                                                                                                                                                                                                                                                                                                                                                                                                                                                                                                                                                                                                                                                                                             |                                                                                                                   |                                                                                                                                                                                                                                                                                                                                                                                                                                                                                                                                                                                                                                                                                                                                                                             |                                                                                                                                                                                                                                                                                                                                                                                                                                                                                                                                                                                                                                                                                                               | Madsen; Olav Hungnes; Pedersen Benedikte Nevjen; Rasmus Riis Kopperud                     |
| EPI_ISL_2467521, EPI_ISL_2629587                                                                                                                                                                                                                                                                                                                                                                                                                                                                                                                                                                                                                                                                                                                                                                                                                                                                                                                                                                                                                                                                                                                                                                                                                                                                                                                                                                                                | GA Department of Public Health                                                                                    | GA Department of Public Health                                                                                                                                                                                                                                                                                                                                                                                                                                                                                                                                                                                                                                                                                                                                              |                                                                                                                                                                                                                                                                                                                                                                                                                                                                                                                                                                                                                                                                                                               | Aliyah Fields; Cynthia Dixey; Jonathan Edwards; Stacy Reeves; Taylor Smith; Tonia Parrott |
| EPI_ISL_1528524                                                                                                                                                                                                                                                                                                                                                                                                                                                                                                                                                                                                                                                                                                                                                                                                                                                                                                                                                                                                                                                                                                                                                                                                                                                                                                                                                                                                                 | GA Department of Public Health Laboratory                                                                         | Centers for Disease Control and Prevention Division of Viral Diseases, Pathogen Discovery                                                                                                                                                                                                                                                                                                                                                                                                                                                                                                                                                                                                                                                                                   | Alison Laufer Halpin; Ben L. Rambo-Martin; Clinton R. Paden; Dakota Howard; Darlene Wagner; Dave Wentworth; Dhvani Batra; Jasmine Padilla; Justin Lee; Katie Dillon; Krista Queen; Kristen Knipe; Kristine Lacek; Mark Burroughs; Matthew Schmerer; Mili Sheth; Peter Cook; Sam Shepard; Sarah Nobles; Shoshona Le; Suxiang Tong; Vivien Dugan; Yvette Unoarumhi                                                                                                                                                                                                                                                                                                                                              |                                                                                           |
| EPI_ISL_2311763, EPI_ISL_2323452, EPI_ISL_2376424, EPI_ISL_2422459, EPI_ISL_2692535                                                                                                                                                                                                                                                                                                                                                                                                                                                                                                                                                                                                                                                                                                                                                                                                                                                                                                                                                                                                                                                                                                                                                                                                                                                                                                                                             | GA Department of Public Health Laboratory                                                                         | Genomics and Discovery, Respiratory Viruses Branch, Division of Viral Diseases, Centers for Disease Control and Prevention                                                                                                                                                                                                                                                                                                                                                                                                                                                                                                                                                                                                                                                  | Adam Retchless; Anna Kelleher; Anna Uehara; Brian Lynch; Clinton R. Paden; Dhvani Batra; Haibin Wang; Han Jia Justin Ng; Jasmine Padilla; Jing Zhang; Justin Lee; Krista Queen; Mark Burroughs; Mili Sheth; Morgan Davis; Peter Cook; Rachel Marine; Sarah Nobles; Suxiang Tong; Tara Coalter; Yan Li; Ying Tao                                                                                                                                                                                                                                                                                                                                                                                               |                                                                                           |
| EPI_ISL_812178                                                                                                                                                                                                                                                                                                                                                                                                                                                                                                                                                                                                                                                                                                                                                                                                                                                                                                                                                                                                                                                                                                                                                                                                                                                                                                                                                                                                                  | GA Department of Public Health Laboratory                                                                         | Pathogen Discovery, Respiratory Viruses Branch, Division of Viral Diseases, Centers for Disease Control and Prevention                                                                                                                                                                                                                                                                                                                                                                                                                                                                                                                                                                                                                                                      | Anna Montmayeur; Anna Uehara; Brian Lynch; Clinton R. Paden; Haibin Wang; Jing Zhang; Krista Queen; Peter Cook; Rachel Marine; Suxiang Tong; Yan Li; Ying Tao                                                                                                                                                                                                                                                                                                                                                                                                                                                                                                                                                 |                                                                                           |
| EPI_ISL_678252                                                                                                                                                                                                                                                                                                                                                                                                                                                                                                                                                                                                                                                                                                                                                                                                                                                                                                                                                                                                                                                                                                                                                                                                                                                                                                                                                                                                                  | General Hospital - Kumanovo                                                                                       | Research Center for Genetic Engineering and Biotechnology "Georgi D. Efremov", Macedonian Academy of Sciences and Arts                                                                                                                                                                                                                                                                                                                                                                                                                                                                                                                                                                                                                                                      |                                                                                                                                                                                                                                                                                                                                                                                                                                                                                                                                                                                                                                                                                                               | RCGEB - MASA                                                                              |
| EPI_ISL_1970999                                                                                                                                                                                                                                                                                                                                                                                                                                                                                                                                                                                                                                                                                                                                                                                                                                                                                                                                                                                                                                                                                                                                                                                                                                                                                                                                                                                                                 | General Hospital - Prilep                                                                                         | Research Center for Genetic Engineering and Biotechnology "Georgi D. Efremov", Macedonian Academy of Sciences and Arts                                                                                                                                                                                                                                                                                                                                                                                                                                                                                                                                                                                                                                                      | Aleksandar J. Dimovski; Dijana Plascheska-Karanfilska; Gjorgji Bozinovski; Milena Jakimovska; Predrag Noveski                                                                                                                                                                                                                                                                                                                                                                                                                                                                                                                                                                                                 |                                                                                           |
| EPI_ISL_918486                                                                                                                                                                                                                                                                                                                                                                                                                                                                                                                                                                                                                                                                                                                                                                                                                                                                                                                                                                                                                                                                                                                                                                                                                                                                                                                                                                                                                  | General Hospital - Struga                                                                                         | Research Center for Genetic Engineering and Biotechnology "Georgi D. Efremov", Macedonian Academy of Sciences and Arts                                                                                                                                                                                                                                                                                                                                                                                                                                                                                                                                                                                                                                                      |                                                                                                                                                                                                                                                                                                                                                                                                                                                                                                                                                                                                                                                                                                               | RCGEB - MASA                                                                              |
| EPI_ISL_1972216, EPI_ISL_2001037                                                                                                                                                                                                                                                                                                                                                                                                                                                                                                                                                                                                                                                                                                                                                                                                                                                                                                                                                                                                                                                                                                                                                                                                                                                                                                                                                                                                | General Hospital - Tetovo                                                                                         | Research Center for Genetic Engineering and Biotechnology "Georgi D. Efremov", Macedonian Academy of Sciences and Arts                                                                                                                                                                                                                                                                                                                                                                                                                                                                                                                                                                                                                                                      | Aleksandar J. Dimovski; Dijana Plascheska-Karanfilska; Gjorgji Bozinovski; Milena Jakimovska; Predrag Noveski                                                                                                                                                                                                                                                                                                                                                                                                                                                                                                                                                                                                 |                                                                                           |
| EPI_ISL_934415                                                                                                                                                                                                                                                                                                                                                                                                                                                                                                                                                                                                                                                                                                                                                                                                                                                                                                                                                                                                                                                                                                                                                                                                                                                                                                                                                                                                                  | General Hospital - Veles                                                                                          | Research Center for Genetic Engineering and Biotechnology "Georgi D. Efremov", Macedonian Academy of Sciences and Arts                                                                                                                                                                                                                                                                                                                                                                                                                                                                                                                                                                                                                                                      |                                                                                                                                                                                                                                                                                                                                                                                                                                                                                                                                                                                                                                                                                                               | RCGEB - MASA                                                                              |
| EPI_ISL_406798                                                                                                                                                                                                                                                                                                                                                                                                                                                                                                                                                                                                                                                                                                                                                                                                                                                                                                                                                                                                                                                                                                                                                                                                                                                                                                                                                                                                                  | General Hospital of Central Theater Command of People's Liberation Army of China                                  | BGI & Institute of Microbiology, Chinese Academy of Sciences & Shandong First Medical University & Shandong Academy of Medical Sciences & General Hospital of Central Theater Command of People's Liberation Army of China                                                                                                                                                                                                                                                                                                                                                                                                                                                                                                                                                  | Weifeng Shi and Zhenhong Hu; Weijun Chen; Yuhai Bi                                                                                                                                                                                                                                                                                                                                                                                                                                                                                                                                                                                                                                                            |                                                                                           |
| EPI_ISL_735325, EPI_ISL_735361                                                                                                                                                                                                                                                                                                                                                                                                                                                                                                                                                                                                                                                                                                                                                                                                                                                                                                                                                                                                                                                                                                                                                                                                                                                                                                                                                                                                  | Genomic Laboratory (GLAB) (Conjoint lab of Health Directorate of Istanbul and Istanbul Technical University)      | Genomic Laboratory (GLAB), Istanbul Technical University                                                                                                                                                                                                                                                                                                                                                                                                                                                                                                                                                                                                                                                                                                                    | Arzu Irvem; Ayse Serra Ozel; Betsi Kose; Gizem Alkurt; Gizem Dinler Doganay; Ilker Karacan; Jale Yildiz; Levent Doganay; Mehtap Aydin; Nihat Bugra Agaoglu; Nilsun Altunal; Nisan Denizce Can; Ozlem Akgun Dogan; Payam Zolfagharian; Tugba Kizilboga Akgun; Yasemin Kendir Demirkol                                                                                                                                                                                                                                                                                                                                                                                                                          |                                                                                           |
| EPI_ISL_2659073                                                                                                                                                                                                                                                                                                                                                                                                                                                                                                                                                                                                                                                                                                                                                                                                                                                                                                                                                                                                                                                                                                                                                                                                                                                                                                                                                                                                                 | Good Samaritan Hospital                                                                                           | Santa Clara County Public Health Laboratory                                                                                                                                                                                                                                                                                                                                                                                                                                                                                                                                                                                                                                                                                                                                 |                                                                                                                                                                                                                                                                                                                                                                                                                                                                                                                                                                                                                                                                                                               | Santa Clara County Public Health Department                                               |
| EPI_ISL_415152                                                                                                                                                                                                                                                                                                                                                                                                                                                                                                                                                                                                                                                                                                                                                                                                                                                                                                                                                                                                                                                                                                                                                                                                                                                                                                                                                                                                                  | Gorgas Memorial Institute for Health Studies                                                                      | Gorgas Memorial Institute for Health Studies                                                                                                                                                                                                                                                                                                                                                                                                                                                                                                                                                                                                                                                                                                                                | Alexander A. Martinez.; Ambar Moreno; Claudia Gonzalez; Danilo Franco; Elimelec Valdespino; Juan M. Pascale; Leyda Abrego; Oris Chavarria; Sandra Lopez-Verges; Yamilka Diaz                                                                                                                                                                                                                                                                                                                                                                                                                                                                                                                                  |                                                                                           |
| EPI_ISL_1502891, EPI_ISL_1502957, EPI_ISL_1502988, EPI_ISL_1503101, EPI_ISL_1503109, EPI_ISL_1503110, EPI_ISL_1503119                                                                                                                                                                                                                                                                                                                                                                                                                                                                                                                                                                                                                                                                                                                                                                                                                                                                                                                                                                                                                                                                                                                                                                                                                                                                                                           | see above                                                                                                         | Gorgas Memorial Laboratory of Health Studies                                                                                                                                                                                                                                                                                                                                                                                                                                                                                                                                                                                                                                                                                                                                | Castillo Jorge; Franco Danilo; Gonzalez Claudia; Jessica Gondola; Leyda Abrego; Lopez-Verges Sandra; Marlenne Castillo; Martinez Alexander; Moreno Ambar; Moreno Brechla; Oris Chavarria; Ortiz Alma                                                                                                                                                                                                                                                                                                                                                                                                                                                                                                          |                                                                                           |
| EPI_ISL_2105482                                                                                                                                                                                                                                                                                                                                                                                                                                                                                                                                                                                                                                                                                                                                                                                                                                                                                                                                                                                                                                                                                                                                                                                                                                                                                                                                                                                                                 | Governor Celestino Gallares Memorial Hospital                                                                     | Philippine Genome Center                                                                                                                                                                                                                                                                                                                                                                                                                                                                                                                                                                                                                                                                                                                                                    | Alethea R. de Guzman; Anna Ong-Lim; Arianne A. Zamora; Asia Louisa U. Chong; Benedict A. Maralit; Candice Francheska B. Tamboan; Carlo M. Lapid; Celia Carlos; Devon Ray Pacial; Edsel Maurice Salvaña; El King D. Morado; Eva Maria Cutiongco-de la Paz; Francis A. Tablizo; Irish Coleen A. Asin; Jaime C. Montoya; Jan Michael C. Yap; Jo-Hannah S. Llamres; John Q. Wong; Joshua Gregor A. Dizon; Juan Antonio R. Magalang; Karol Sophia Agape R. Padilla; Kenneth M. Kim; Kris P. Punayan; Marc Edsel C. Ayes; Marc Jerrone R. Castro; Maria Rosario Singh-Vergeire and Cynthia P. Saloma; Maria Sofia L. Yangzon; Marissa Alejandria; Razel Nikka M. Hao; Rianna Patricia S. Cruz; Sheila Mae M. Araiza |                                                                                           |
| EPI_ISL_640043                                                                                                                                                                                                                                                                                                                                                                                                                                                                                                                                                                                                                                                                                                                                                                                                                                                                                                                                                                                                                                                                                                                                                                                                                                                                                                                                                                                                                  | Groote Schuur Hospital wc GSH                                                                                     | NHLS/UCT                                                                                                                                                                                                                                                                                                                                                                                                                                                                                                                                                                                                                                                                                                                                                                    | Arash Iranzadeh; Bruna Galvao; Carolyn Williamson; Deelan Doolabh; Diana Hardie; Innocent Mudau; Kruger Marais; Lynn Tyers; Marvin Hsiao; Stephen Korsman                                                                                                                                                                                                                                                                                                                                                                                                                                                                                                                                                     |                                                                                           |
| EPI_ISL_699040, EPI_ISL_699161                                                                                                                                                                                                                                                                                                                                                                                                                                                                                                                                                                                                                                                                                                                                                                                                                                                                                                                                                                                                                                                                                                                                                                                                                                                                                                                                                                                                  | Group 42 (G42) Healthcare, Abu Dhabi, United Arab Emirates; Department of Health, The United Arab Emirates        | G42 Healthcare                                                                                                                                                                                                                                                                                                                                                                                                                                                                                                                                                                                                                                                                                                                                                              | Ashish Koshy; Budoor Alqarni; Denghui Liu; Fang Chen; Hanif Khalek; Huanming Yang; Javier Quilez; Jian Wang; Junhua Li; Ke Liang; Long Lin; Mohammed Saifuddin Fasihuddin; Nan Qiao; Nawal Ahmed Mohamed Al Kaabi; Pauline Ogrodzki; Pei Wu; Peng Xiao; Pengjuan Liu; Rong Liu; Sally Mahmoud; Siyang Liu; Stephen S. Francis; Tao Ma; Vinay Kusuma; Walid Abbas Zaher; Weibin Liu; Wenjun He; Xavier Anton; Xin Jin; Xin Meng; Xinyu Huang; Xun Xu; Zhaorong Yuan                                                                                                                                                                                                                                            |                                                                                           |
| EPI_ISL_1798902, EPI_ISL_1798906, EPI_ISL_1823584, EPI_ISL_2229105, EPI_ISL_2451679, EPI_ISL_2451690                                                                                                                                                                                                                                                                                                                                                                                                                                                                                                                                                                                                                                                                                                                                                                                                                                                                                                                                                                                                                                                                                                                                                                                                                                                                                                                            | Guam Public Health Laboratory                                                                                     | Centers for Disease Control and Prevention Division of Viral Diseases, Pathogen Discovery                                                                                                                                                                                                                                                                                                                                                                                                                                                                                                                                                                                                                                                                                   | Alison Laufer Halpin; Ben L. Rambo-Martin; Clinton R. Paden; Dakota Howard; Darlene Wagner; Dave Wentworth; Dhvani Batra; Jasmine Padilla; Justin Lee; Katie Dillon; Krista Queen; Kristen Knipe; Kristine Lacek; Mark Burroughs; Matthew Schmerer; Mili Sheth; Peter Cook; Sam Shepard; Sarah Nobles; Shoshona Le; Suxiang Tong; Vivien Dugan; Yvette Unoarumhi                                                                                                                                                                                                                                                                                                                                              |                                                                                           |
| EPI_ISL_1708562                                                                                                                                                                                                                                                                                                                                                                                                                                                                                                                                                                                                                                                                                                                                                                                                                                                                                                                                                                                                                                                                                                                                                                                                                                                                                                                                                                                                                 | Gundersen Clinical Microbiology Laboratory                                                                        | Kabara Cancer Research Institute                                                                                                                                                                                                                                                                                                                                                                                                                                                                                                                                                                                                                                                                                                                                            | Craig S. Richmond; Paraic A. Kenny                                                                                                                                                                                                                                                                                                                                                                                                                                                                                                                                                                                                                                                                            |                                                                                           |
| EPI_ISL_547703, EPI_ISL_661031                                                                                                                                                                                                                                                                                                                                                                                                                                                                                                                                                                                                                                                                                                                                                                                                                                                                                                                                                                                                                                                                                                                                                                                                                                                                                                                                                                                                  | Gundersen Molecular Diagnostics Laboratory                                                                        | Kabara Cancer Research Institute                                                                                                                                                                                                                                                                                                                                                                                                                                                                                                                                                                                                                                                                                                                                            | Craig S. Richmond; Paraic A. Kenny                                                                                                                                                                                                                                                                                                                                                                                                                                                                                                                                                                                                                                                                            |                                                                                           |
| EPI_ISL_2694956                                                                                                                                                                                                                                                                                                                                                                                                                                                                                                                                                                                                                                                                                                                                                                                                                                                                                                                                                                                                                                                                                                                                                                                                                                                                                                                                                                                                                 | H Fernando Fonseca                                                                                                | Instituto Nacional de Saude (INSA)                                                                                                                                                                                                                                                                                                                                                                                                                                                                                                                                                                                                                                                                                                                                          | Borges et al                                                                                                                                                                                                                                                                                                                                                                                                                                                                                                                                                                                                                                                                                                  |                                                                                           |
| EPI_ISL_733351, EPI_ISL_872972, EPI_ISL_872983, EPI_ISL_1652566, EPI_ISL_1664679, EPI_ISL_1919516, EPI_ISL_1919546, EPI_ISL_2385226, EPI_ISL_2385230, EPI_ISL_2385261, EPI_ISL_2385266, EPI_ISL_2385280, EPI_ISL_2385308, EPI_ISL_2450590                                                                                                                                                                                                                                                                                                                                                                                                                                                                                                                                                                                                                                                                                                                                                                                                                                                                                                                                                                                                                                                                                                                                                                                       | see above                                                                                                         | WHO National Influenza Centre Russian Federation                                                                                                                                                                                                                                                                                                                                                                                                                                                                                                                                                                                                                                                                                                                            | Andrey Komissarov; Anna Ivanova; Artem Fadeev; Daria Danilenko; Dmitry Bazhenov; Dmitry Lioznov; Elena Nabieva; Georgii Bazykin; Kirill Varchenko; Ksenia Safina; Kseniya Komissarova; Maria Pisareva; Maria Timofeeva; Mikhail Bakaev; Nikita Yolshin; Oula Mansour; Oula Masour; Tamila Musaeva; Veronika Eder                                                                                                                                                                                                                                                                                                                                                                                              |                                                                                           |
| EPI_ISL_2452134                                                                                                                                                                                                                                                                                                                                                                                                                                                                                                                                                                                                                                                                                                                                                                                                                                                                                                                                                                                                                                                                                                                                                                                                                                                                                                                                                                                                                 | HI Dept. of Health, State Laboratories Division                                                                   | Centers for Disease Control and Prevention Division of Viral Diseases, Pathogen Discovery                                                                                                                                                                                                                                                                                                                                                                                                                                                                                                                                                                                                                                                                                   | Alison Laufer Halpin; Ben L. Rambo-Martin; Clinton R. Paden; Dakota Howard; Darlene Wagner; Dave Wentworth; Dhvani Batra; Jasmine Padilla; Justin Lee; Katie Dillon; Krista Queen; Kristen Knipe; Kristine Lacek; Mark Burroughs; Matthew Schmerer; Mili Sheth; Peter Cook; Sam Shepard; Sarah Nobles; Shoshona Le; Suxiang Tong; Vivien Dugan; Yvette Unoarumhi                                                                                                                                                                                                                                                                                                                                              |                                                                                           |
| EPI_ISL_1336649                                                                                                                                                                                                                                                                                                                                                                                                                                                                                                                                                                                                                                                                                                                                                                                                                                                                                                                                                                                                                                                                                                                                                                                                                                                                                                                                                                                                                 | HOPITAL PRINCESSE GRACE                                                                                           | CNR Virus des Infections Respiratoires - France SUD                                                                                                                                                                                                                                                                                                                                                                                                                                                                                                                                                                                                                                                                                                                         | Antonin Bal; Bruno Lina; Gregory Destras; Gwendolyne Burfin; Hadrien Regue; Laurence Josset; Martine Valette; Quentin Semanas                                                                                                                                                                                                                                                                                                                                                                                                                                                                                                                                                                                 |                                                                                           |
| EPI_ISL_2331774                                                                                                                                                                                                                                                                                                                                                                                                                                                                                                                                                                                                                                                                                                                                                                                                                                                                                                                                                                                                                                                                                                                                                                                                                                                                                                                                                                                                                 | HOSPITAL GENERAL VIRGEN DE LA LUZ                                                                                 | Instituto de Salud Carlos III                                                                                                                                                                                                                                                                                                                                                                                                                                                                                                                                                                                                                                                                                                                                               | A. Monzón; F. Casas; I. Jiménez; I.RODRIGUEZ ESCUDERO; Iglesias-Caballero; M. Sardonis; MARIA JOSE; P. Zaballos; S. Camarero; S. Cuesta; S. Pozo; S. Varona; V. Vázquez-Morón                                                                                                                                                                                                                                                                                                                                                                                                                                                                                                                                 |                                                                                           |
| EPI_ISL_2020128                                                                                                                                                                                                                                                                                                                                                                                                                                                                                                                                                                                                                                                                                                                                                                                                                                                                                                                                                                                                                                                                                                                                                                                                                                                                                                                                                                                                                 | HOSPITAL MATEU ORFILA                                                                                             | HOSPITAL UNIVERSITARIO SON ESPASES                                                                                                                                                                                                                                                                                                                                                                                                                                                                                                                                                                                                                                                                                                                                          | Antonio Oliver; Carla López-Causapé; Pablo Fraile-Ribot; SeqCovid                                                                                                                                                                                                                                                                                                                                                                                                                                                                                                                                                                                                                                             |                                                                                           |
| EPI_ISL_636977                                                                                                                                                                                                                                                                                                                                                                                                                                                                                                                                                                                                                                                                                                                                                                                                                                                                                                                                                                                                                                                                                                                                                                                                                                                                                                                                                                                                                  | HP Pemba                                                                                                          | KRISP, KZN Research Innovation and Sequencing Platform                                                                                                                                                                                                                                                                                                                                                                                                                                                                                                                                                                                                                                                                                                                      | Giandhari J.; Ismael N.; Nadia Siteo; Nedio Mabunda; Paulo Arnaldo; Pillay S.; Tegally H; Wilkinson E; de Oliveira T                                                                                                                                                                                                                                                                                                                                                                                                                                                                                                                                                                                          |                                                                                           |
| EPI_ISL_2738567                                                                                                                                                                                                                                                                                                                                                                                                                                                                                                                                                                                                                                                                                                                                                                                                                                                                                                                                                                                                                                                                                                                                                                                                                                                                                                                                                                                                                 | Hackensack Medical Center                                                                                         | New York Genome Center                                                                                                                                                                                                                                                                                                                                                                                                                                                                                                                                                                                                                                                                                                                                                      | Andre Corvelo; Barry Kreiswirth; David Perlín; Dayna M. Oschwald; Jose Mediavilla; Kaelea Composto; Kar Chow; Liang Chen; Marcus Cunningham; Michael Zody; Samantha Fennessey; Tom Maniatis                                                                                                                                                                                                                                                                                                                                                                                                                                                                                                                   |                                                                                           |
| EPI_ISL_1089048                                                                                                                                                                                                                                                                                                                                                                                                                                                                                                                                                                                                                                                                                                                                                                                                                                                                                                                                                                                                                                                                                                                                                                                                                                                                                                                                                                                                                 | Helix / Illumina                                                                                                  | Respiratory Viruses Branch, Division of Viral Diseases, Centers for Disease Control and Prevention                                                                                                                                                                                                                                                                                                                                                                                                                                                                                                                                                                                                                                                                          | Alexandre Bolze; Ary Ascencio; Ben L. Rambo-Martin; Brad Sickler; Charlotte Rivera-Garcia; Christine Tran; Clinton R. Paden; Dakota Howard; David Becker; Dhvani Batra; Duncan MacCannell; Efrén Sandoval; Eileen de Feo; Elizabeth Cirulli; Eric Allen; Geraint Levan; James Lu; Jan Antico; Jason Nguyen; Jimmy Ramirez; Jingtao Liu; Kelly Schiabor Barrett; Kim Gietzen; Magnus Isaksson; Marc Laurent; Matthew Tolentino; Nicole L. Washington; Peter W. Cook; Phil Febbo; Ryan Cho; Shannon Wickline; Sherry Wang; Simon White; Summer Galloway; Suxiang Tong; Tyler Cassens; William Lee                                                                                                               |                                                                                           |
| EPI_ISL_1262036, EPI_ISL_1391995, EPI_ISL_1420974, EPI_ISL_1460961, EPI_ISL_1512099, EPI_ISL_1554417, EPI_ISL_1576106, EPI_ISL_1581075, EPI_ISL_1592421, EPI_ISL_1592485, EPI_ISL_1615349, EPI_ISL_1615384, EPI_ISL_1679967, EPI_ISL_1680048, EPI_ISL_1690467, EPI_ISL_1735500, EPI_ISL_1735545, EPI_ISL_1797026, EPI_ISL_1797206, EPI_ISL_1803813, EPI_ISL_1803921, EPI_ISL_1804135, EPI_ISL_1804282, EPI_ISL_1804494, EPI_ISL_1907338, EPI_ISL_1907632, EPI_ISL_1907995, EPI_ISL_1923331, EPI_ISL_1923362, EPI_ISL_1923401, EPI_ISL_1923785, EPI_ISL_1923911, EPI_ISL_1923955, EPI_ISL_1924007, EPI_ISL_1924031, EPI_ISL_1942165, EPI_ISL_1990614, EPI_ISL_1990723, EPI_ISL_1990741, EPI_ISL_1990856, EPI_ISL_1990910, EPI_ISL_1990921, EPI_ISL_1991008, EPI_ISL_1991368, EPI_ISL_1991454, EPI_ISL_1991572, EPI_ISL_1991775, EPI_ISL_2009735, EPI_ISL_2010071, EPI_ISL_2010188, EPI_ISL_2010380, EPI_ISL_2010430, EPI_ISL_2010478, EPI_ISL_2010812, EPI_ISL_2010872, EPI_ISL_2097653, EPI_ISL_2097683, EPI_ISL_2097858, EPI_ISL_2098013, EPI_ISL_2144255, EPI_ISL_2144340, EPI_ISL_2144346, EPI_ISL_2144363, EPI_ISL_2144594, EPI_ISL_2145008, EPI_ISL_2145113, EPI_ISL_2145142, EPI_ISL_2145272, EPI_ISL_2145592, EPI_ISL_2145734, EPI_ISL_2159577, EPI_ISL_2159811, EPI_ISL_2159870, EPI_ISL_2160115, EPI_ISL_2187341, EPI_ISL_2248098, EPI_ISL_2248220, EPI_ISL_2269629, EPI_ISL_2269932, EPI_ISL_2269968, EPI_ISL_2320077 | Centers for Disease Control and Prevention Division of Viral Diseases, Pathogen Discovery                         | Adrian Paskey; Alexandre Bolze; Ary Ascencio; Ben L. Rambo-Martin; Benjamin Rambo-Martin; Brad Sickler; Charlotte Rivera-Garcia; Christine Tran; Christopher Gulvick; Clinton R. Paden; Dakota Howard; Darlene Wagner; David Becker; Dhvani Batra; Duncan MacCannell; Efrén Sandoval; Eileen de Feo; Elizabeth Cirulli; Eric Allen; Geraint Levan; James Lu; Jan Antico; Jason Caravas; Jason Nguyen; Jimmy Ramirez; Jingtao Liu; Kara Moser; Kelly Schiabor Barrett; Kim Gietzen; Magnus Isaksson; Marc Laurent; Matthew Schmerer; Matthew Tolentino; Nicole L. Washington; Peter W. Cook; Phil Febbo; Ryan Cho; Scott Sammons; Shannon Wickline; Shatavia Morrison; Sherry Wang; Simon White; Summer Galloway; Suxiang Tong; Tyler Cassens; William Lee; Yvette Unoarumhi |                                                                                                                                                                                                                                                                                                                                                                                                                                                                                                                                                                                                                                                                                                               |                                                                                           |
| EPI_ISL_850626                                                                                                                                                                                                                                                                                                                                                                                                                                                                                                                                                                                                                                                                                                                                                                                                                                                                                                                                                                                                                                                                                                                                                                                                                                                                                                                                                                                                                  | Helix/Illumina                                                                                                    | Genomics and Discovery, Respiratory Viruses Branch, Division of Viral Diseases, Centers for Disease Control and Prevention                                                                                                                                                                                                                                                                                                                                                                                                                                                                                                                                                                                                                                                  | Alexandre Bolze; Ary Ascencio; Ben L. Rambo-Martin Eileen de Feo; Brad Sickler; Charlotte Rivera-Garcia; Christine Tran; Clinton R. Paden; David Becker; Dhvani Batra; Duncan MacCannell; Efrén Sandoval; Elizabeth Cirulli; Eric Allen; Geraint Levan; James Lu; Jan Antico; Jason Nguyen; Jimmy Ramirez; Jingtao Liu; Kelly Schiabor Barrett; Kim Gietzen; Magnus Isaksson; Marc Laurent; Matthew Tolentino; Nicole L. Washington; Peter W. Cook; Phil Febbo; Ryan Cho; Shannon Wickline; Sherry Wang; Simon White; Summer Galloway; Suxiang Tong; Tyler Cassens; William Lee                                                                                                                               |                                                                                           |
| EPI_ISL_978735                                                                                                                                                                                                                                                                                                                                                                                                                                                                                                                                                                                                                                                                                                                                                                                                                                                                                                                                                                                                                                                                                                                                                                                                                                                                                                                                                                                                                  | Helix/Illumina                                                                                                    | Respiratory Viruses Branch, Division of Viral Diseases, Centers for Disease Control and Prevention                                                                                                                                                                                                                                                                                                                                                                                                                                                                                                                                                                                                                                                                          | ; Alexandre Bolze; Ary Ascencio; Ben L. Rambo-Martin; Brad Sickler; Charlotte Rivera-Garcia; Christine Tran; Clinton R. Paden; Dakota Howard; David Becker; Dhvani Batra; Duncan MacCannell; Efrén Sandoval; Eileen de Feo; Elizabeth Cirulli; Eric Allen; Geraint Levan; James Lu; Jan Antico; Jason Nguyen; Jimmy Ramirez; Jingtao Liu; Kelly Schiabor Barrett; Kim Gietzen; Magnus Isaksson; Marc Laurent; Matthew Tolentino; Nicole L. Washington; Peter W. Cook; Phil Febbo; Ryan Cho; Shannon Wickline; Sherry Wang; Simon White; Summer Galloway; Suxiang Tong; Tyler Cassens; William Lee                                                                                                             |                                                                                           |
| EPI_ISL_906752                                                                                                                                                                                                                                                                                                                                                                                                                                                                                                                                                                                                                                                                                                                                                                                                                                                                                                                                                                                                                                                                                                                                                                                                                                                                                                                                                                                                                  | Hematology Laboratory, Section of Molecular Diagnostics, University Clinical Centre, Medical University of Gdansk | Laboratory of Recombinant Vaccines                                                                                                                                                                                                                                                                                                                                                                                                                                                                                                                                                                                                                                                                                                                                          | Adam Sodol; Aneta Zsulc; Bogusław Szewczyk; Ewa Milosz; Krystyna Bienkowska-Szewczyk; Krzysztof Lewandowski; Łukasz Rabalski; Maciej Gryzbek; Maciej Kosinski; Marlena Robakowska                                                                                                                                                                                                                                                                                                                                                                                                                                                                                                                             |                                                                                           |
| EPI_ISL_1201507                                                                                                                                                                                                                                                                                                                                                                                                                                                                                                                                                                                                                                                                                                                                                                                                                                                                                                                                                                                                                                                                                                                                                                                                                                                                                                                                                                                                                 | Hopital                                                                                                           | National Reference Center for Viruses of Respiratory Infections, Institut Pasteur, Paris                                                                                                                                                                                                                                                                                                                                                                                                                                                                                                                                                                                                                                                                                    | Angela Brisebarre; Camille Capel; Durivault Jérôme; Etienne Simon-Lorière; Marion Barbet; Maud Vanpeene; Méline Bizard; Sylvie Behillil; Sylvie van der Werf; Vincent Enouf                                                                                                                                                                                                                                                                                                                                                                                                                                                                                                                                   |                                                                                           |
| EPI_ISL_2484022, EPI_ISL_2601724                                                                                                                                                                                                                                                                                                                                                                                                                                                                                                                                                                                                                                                                                                                                                                                                                                                                                                                                                                                                                                                                                                                                                                                                                                                                                                                                                                                                | Hospital General Universitario Gregorio Marañón                                                                   | Hospital General Universitario Gregorio Marañón                                                                                                                                                                                                                                                                                                                                                                                                                                                                                                                                                                                                                                                                                                                             | Cristina Rodriguez-Grande; Darío García de Viedma; Julia Suárez; Laura Pérez-Lago; Marta Herranz Martin; Patricia Muñoz; Pedro Sola Campoy; Pilar Catalán; Sergio Buenestado Serrano; Victor Manuel de la Cueva                                                                                                                                                                                                                                                                                                                                                                                                                                                                                               |                                                                                           |
| EPI_ISL_1196770                                                                                                                                                                                                                                                                                                                                                                                                                                                                                                                                                                                                                                                                                                                                                                                                                                                                                                                                                                                                                                                                                                                                                                                                                                                                                                                                                                                                                 | Hospital Melaka                                                                                                   | Institute for Medical Research, Infectious Disease Research Centre, National Institutes of Health, Ministry of Health Malaysia                                                                                                                                                                                                                                                                                                                                                                                                                                                                                                                                                                                                                                              | Kamel K; Mohd Zawawi Z; Ramly N; Robert F; Suppliah J; Thayan R                                                                                                                                                                                                                                                                                                                                                                                                                                                                                                                                                                                                                                               |                                                                                           |

|                                                                                                                                                                                                                                                                                                                                                                                       |                                                                                |                                                                                                                                                                                                                                                                                                                 |                                                                                                                                                                                                                                                                                                                                                                                                                                                                                                                                                                                                                                                                                                                                                                                                                                                                                                                                                                                                                                                                                                                                                                                                                                                                                                                                                                                                                                                                                                                                                                                                                                             |
|---------------------------------------------------------------------------------------------------------------------------------------------------------------------------------------------------------------------------------------------------------------------------------------------------------------------------------------------------------------------------------------|--------------------------------------------------------------------------------|-----------------------------------------------------------------------------------------------------------------------------------------------------------------------------------------------------------------------------------------------------------------------------------------------------------------|---------------------------------------------------------------------------------------------------------------------------------------------------------------------------------------------------------------------------------------------------------------------------------------------------------------------------------------------------------------------------------------------------------------------------------------------------------------------------------------------------------------------------------------------------------------------------------------------------------------------------------------------------------------------------------------------------------------------------------------------------------------------------------------------------------------------------------------------------------------------------------------------------------------------------------------------------------------------------------------------------------------------------------------------------------------------------------------------------------------------------------------------------------------------------------------------------------------------------------------------------------------------------------------------------------------------------------------------------------------------------------------------------------------------------------------------------------------------------------------------------------------------------------------------------------------------------------------------------------------------------------------------|
| EPI_ISL_1482631, EPI_ISL_1491363                                                                                                                                                                                                                                                                                                                                                      | Hospital Sharp                                                                 | Microbial Genomics Laboratory                                                                                                                                                                                                                                                                                   | Alejandra García-Gasca; Bruno Gomez-Gil; Daniel Fregoso-Rueda; Julissa Enciso-Ibarra                                                                                                                                                                                                                                                                                                                                                                                                                                                                                                                                                                                                                                                                                                                                                                                                                                                                                                                                                                                                                                                                                                                                                                                                                                                                                                                                                                                                                                                                                                                                                        |
| EPI_ISL_455351                                                                                                                                                                                                                                                                                                                                                                        | Hospital Txagorritxu                                                           | Instituto de Salud Carlos III                                                                                                                                                                                                                                                                                   | A. Monzón; C. Gómez; F. Casas; I. I. Jiménez; Iglesias-Caballero; M. Camarero; M. Cuesta; M. González-Esguevillas; M. Molinero Calamita; M. Zaballos; P. Jiménez; S. Juliá; S. Pozo; S. Varona                                                                                                                                                                                                                                                                                                                                                                                                                                                                                                                                                                                                                                                                                                                                                                                                                                                                                                                                                                                                                                                                                                                                                                                                                                                                                                                                                                                                                                              |
| EPI_ISL_2524770                                                                                                                                                                                                                                                                                                                                                                       | Hospital Universitari Arnau de Vilanova                                        | Hospital Universitari Vall d'Hebron - Vall d'Hebron Institut de Recerca                                                                                                                                                                                                                                         | Alejandra González-Sánchez; Andrés Antón; Ariadna Rando; Carla Castillo; Cristina Andrés; Josep Quer; Juliana Esperalba; Maria Carmen Martin; Maria Gema Codina; Maria Piñana; Tomàs Pumarola                                                                                                                                                                                                                                                                                                                                                                                                                                                                                                                                                                                                                                                                                                                                                                                                                                                                                                                                                                                                                                                                                                                                                                                                                                                                                                                                                                                                                                               |
| EPI_ISL_2352009, EPI_ISL_2352011, EPI_ISL_2516487, EPI_ISL_2637349                                                                                                                                                                                                                                                                                                                    | Hospital Universitari Bellvitge                                                | Microbiology Department                                                                                                                                                                                                                                                                                         | Aida Gonzalez-Diaz; Carmen Ardanuy; Jordi Camara; Jordi Niubó; Laura Calatayud; M Angeles Domínguez; Miquel Fernandez-Huerta; Sara Marti                                                                                                                                                                                                                                                                                                                                                                                                                                                                                                                                                                                                                                                                                                                                                                                                                                                                                                                                                                                                                                                                                                                                                                                                                                                                                                                                                                                                                                                                                                    |
| EPI_ISL_1582891                                                                                                                                                                                                                                                                                                                                                                       | Hospital Universitari Vall d'Hebron - Vall Hebron Institut de Recerca          | Hospital Universitari Vall d'Hebron - Vall Hebron Institut de Recerca                                                                                                                                                                                                                                           | Andrés Antón; Ariadna Rando; Carla Castillo; Cristina Andrés; Damir García-Cehic; Josep F Abril; Josep Quer; Juliana Esperalba; Maria Carmen Martin; Maria Gema Codina; Maria Piñana; Tomàs Pumarola                                                                                                                                                                                                                                                                                                                                                                                                                                                                                                                                                                                                                                                                                                                                                                                                                                                                                                                                                                                                                                                                                                                                                                                                                                                                                                                                                                                                                                        |
| EPI_ISL_1908856, EPI_ISL_2047772, EPI_ISL_2047773, EPI_ISL_2284923, EPI_ISL_2493132                                                                                                                                                                                                                                                                                                   | Hospital Universitari Vall d'Hebron - Vall d'Hebron Institut de Recerca        | Hospital Universitari Vall d'Hebron - Vall d'Hebron Institut de Recerca                                                                                                                                                                                                                                         | Alejandra González-Sánchez; Andrés Antón; Ariadna Rando; Carla Castillo; Cristina Andrés; Damir García-Cehic; Josep Quer; Juliana Esperalba; Maria Carmen Martin; Maria Gema Codina; Maria Piñana; Tomàs Pumarola                                                                                                                                                                                                                                                                                                                                                                                                                                                                                                                                                                                                                                                                                                                                                                                                                                                                                                                                                                                                                                                                                                                                                                                                                                                                                                                                                                                                                           |
| EPI_ISL_2271215                                                                                                                                                                                                                                                                                                                                                                       | Hospital Universitario Clínico San Cecilio                                     | SeqCOVID-SPAIN consortium/IBV(CSIC)                                                                                                                                                                                                                                                                             | Adolfo de Salazar; Federico García; Laura Viñuela; Natalia Chueca and SeqCOVID-SPAIN consortium                                                                                                                                                                                                                                                                                                                                                                                                                                                                                                                                                                                                                                                                                                                                                                                                                                                                                                                                                                                                                                                                                                                                                                                                                                                                                                                                                                                                                                                                                                                                             |
| EPI_ISL_2091014                                                                                                                                                                                                                                                                                                                                                                       | Hospital Universitario Cruces                                                  | Biocruces Bizkaia                                                                                                                                                                                                                                                                                               | Ana Belen de la Hoz; Mikel Gallego                                                                                                                                                                                                                                                                                                                                                                                                                                                                                                                                                                                                                                                                                                                                                                                                                                                                                                                                                                                                                                                                                                                                                                                                                                                                                                                                                                                                                                                                                                                                                                                                          |
| EPI_ISL_582109, EPI_ISL_1671520                                                                                                                                                                                                                                                                                                                                                       | Hospital Universitario Marqués de Valdecilla - IDIVAL (Santander, Cantabria)   | SeqCOVID-SPAIN consortium/IBV(CSIC)                                                                                                                                                                                                                                                                             | Daniel Pablo Marcos; Jesús Rodríguez Rodríguez; Jose Manuel Méndez Legaza; María Eleicer Cano García; María Siller Ruiz and SeqCOVID-SPAIN consortium; Mónica Gozalo Margüello                                                                                                                                                                                                                                                                                                                                                                                                                                                                                                                                                                                                                                                                                                                                                                                                                                                                                                                                                                                                                                                                                                                                                                                                                                                                                                                                                                                                                                                              |
| EPI_ISL_693535                                                                                                                                                                                                                                                                                                                                                                        | Hospital Vila Franca de Xira                                                   | Instituto Nacional de Saude (INSA)                                                                                                                                                                                                                                                                              | Borges et al                                                                                                                                                                                                                                                                                                                                                                                                                                                                                                                                                                                                                                                                                                                                                                                                                                                                                                                                                                                                                                                                                                                                                                                                                                                                                                                                                                                                                                                                                                                                                                                                                                |
| EPI_ISL_1490405                                                                                                                                                                                                                                                                                                                                                                       | Hospital of Southern Norway - Kristiansand, Department of Medical Microbiology | Norwegian Institute of Public Health, Department of Virology                                                                                                                                                                                                                                                    | Atiya R Ali; Debech Nadia; Engebretsen Serina Beate; García Llorente Ignacio; Hilde Elshaug; Hilde Vollan; Jon Bråte; Kamilla Heddeland Intestford; Karoline Bragstad; Kathrine Stene-Johansen; Marie Paulsen Madsen; Olav Hungnes; Pedersen Benedikte Nevjen; Rasmus Riis Kopperud                                                                                                                                                                                                                                                                                                                                                                                                                                                                                                                                                                                                                                                                                                                                                                                                                                                                                                                                                                                                                                                                                                                                                                                                                                                                                                                                                         |
| EPI_ISL_784021, EPI_ISL_1237692, EPI_ISL_2225235, EPI_ISL_2225238                                                                                                                                                                                                                                                                                                                     | Houston Methodist Hospital                                                     | Houston Methodist Hospital                                                                                                                                                                                                                                                                                      | David W. Bernard; Heather Hendrickson; Ilya J. Finkelstein; James J. Davis; Jessica Cambric; Jimmy Gollihar; Kristina Reppond; Layne Pruitt; Madison N. Shyer; Marcus Nguyen; Matthew Ojeda Saavedra; Maulik Shukla; Paul A. Christensen; Prasanti Yerramilli; Randall J. Olsen; Robert Olson; Ryan Gadd; S. Wesley Long; Sishir Subedi; and James M. Musser                                                                                                                                                                                                                                                                                                                                                                                                                                                                                                                                                                                                                                                                                                                                                                                                                                                                                                                                                                                                                                                                                                                                                                                                                                                                                |
| EPI_ISL_645059                                                                                                                                                                                                                                                                                                                                                                        | Human Genome Variation Research Group, Malopolska Centre of Biotechnology      | Human Genome Variation Research Group, Malopolska Centre of Biotechnology                                                                                                                                                                                                                                       | Botwina, P.; Branicki, W.; Dabrowska, A.; Foremny, J.; Gromowski, T.; Klajmon, A.; Kopera, K.; Kowalski, M.; Labaj; Marszałek, K.; Owczarek, K.; P.P.; Pisarek, A.; Pospiech, E.; Pyrc, K.; Sanak, M.; Swadzb, J.; Szczepanski, A.                                                                                                                                                                                                                                                                                                                                                                                                                                                                                                                                                                                                                                                                                                                                                                                                                                                                                                                                                                                                                                                                                                                                                                                                                                                                                                                                                                                                          |
| EPI_ISL_1272929                                                                                                                                                                                                                                                                                                                                                                       | IA State Hygienic Laboratory                                                   | Centers for Disease Control and Prevention Division of Viral Diseases, Pathogen Discovery                                                                                                                                                                                                                       | Anna Montmayeur; Anna Uehara; Ben L. Rambo-Martin; Clinton R. Paden; Dhvani Batra; Haibin Wang; Jasmine Padilla; Jing Zhang; Justin Lee; Katie Dillon; Krista Queen; Kristen Knipe; Kristine Lacey; Lori Rowe; Mark Burroughs; Matthew Schmerer; Mili Sheth; Peter W. Cook; Rachel Marine; Sam Shepard; Sarah Nobles; Shoshona Le; Suxiang Tong; Yan Li; Ying Tao                                                                                                                                                                                                                                                                                                                                                                                                                                                                                                                                                                                                                                                                                                                                                                                                                                                                                                                                                                                                                                                                                                                                                                                                                                                                           |
| EPI_ISL_2234879, EPI_ISL_2234883, EPI_ISL_2234900, EPI_ISL_2234903, EPI_ISL_2444780, EPI_ISL_2444783, EPI_ISL_2444788, EPI_ISL_2444791, EPI_ISL_2444793, EPI_ISL_2444794, EPI_ISL_2444799, EPI_ISL_2444801, EPI_ISL_2444803, EPI_ISL_2444807, EPI_ISL_2444812, EPI_ISL_2444814, EPI_ISL_2444817, EPI_ISL_2444818, EPI_ISL_2444819, EPI_ISL_2444820, EPI_ISL_2444821, EPI_ISL_2444822, | see above                                                                      | IICS-UNA                                                                                                                                                                                                                                                                                                        | Adriana Valenzuela; Alejandra Rojas; Chyntia Diaz; Eva Nara; Fatima Cardozo; Florencia del Puerto; Joel Ortiz; Jonas Fernandez; Laura Franco; Laura Mendoza; Leticia Rojas; Magaly Martinez; Maria Eugenia Galeano.                                                                                                                                                                                                                                                                                                                                                                                                                                                                                                                                                                                                                                                                                                                                                                                                                                                                                                                                                                                                                                                                                                                                                                                                                                                                                                                                                                                                                         |
| EPI_ISL_1626577, EPI_ISL_1994891, EPI_ISL_1994892, EPI_ISL_2134586, EPI_ISL_2134606, EPI_ISL_2134610, EPI_ISL_2242591, EPI_ISL_2557220, EPI_ISL_2688209                                                                                                                                                                                                                               | see above                                                                      | IN State Department of Health Laboratory Services                                                                                                                                                                                                                                                               | Ankita Kashikar; Brian Pope; Cassandra Campion; Jamie Yeadon; Kylene Brownlee; Lixia Liu; Mark Glazier; Melissa Hindenlang                                                                                                                                                                                                                                                                                                                                                                                                                                                                                                                                                                                                                                                                                                                                                                                                                                                                                                                                                                                                                                                                                                                                                                                                                                                                                                                                                                                                                                                                                                                  |
| EPI_ISL_1577798, EPI_ISL_1577817                                                                                                                                                                                                                                                                                                                                                      | INHRR                                                                          | Laboratorio de Virología Molecular                                                                                                                                                                                                                                                                              | Aguilar M; Alarcon V; D Angelo P; Delgado M; Garzaro D; Jaspe RC; Loureiro CL; Pujol FH; Rangel HR; Rodriguez L; Zambrano JL                                                                                                                                                                                                                                                                                                                                                                                                                                                                                                                                                                                                                                                                                                                                                                                                                                                                                                                                                                                                                                                                                                                                                                                                                                                                                                                                                                                                                                                                                                                |
| EPI_ISL_2484167                                                                                                                                                                                                                                                                                                                                                                       | INSP-Bamako                                                                    | Malaria Research and Training Center                                                                                                                                                                                                                                                                            | Abdoulaye Djimbe; Amadou Daou; Antoine Dara; Demba Koita; Ibrehima Guindo                                                                                                                                                                                                                                                                                                                                                                                                                                                                                                                                                                                                                                                                                                                                                                                                                                                                                                                                                                                                                                                                                                                                                                                                                                                                                                                                                                                                                                                                                                                                                                   |
| EPI_ISL_1630259                                                                                                                                                                                                                                                                                                                                                                       | IRESSEF                                                                        | Abbott                                                                                                                                                                                                                                                                                                          | Adbou Padane; Ambroise Ahoudi; Aminata Dia; Aminata Mboup; Ana Olivo; Anna julienne selbe Ndiaye; Barbara Harris; Cyrille Diedhiou; Gavin Cloherty; Mary Rodgers; Moustapha Mbow; Nafissatou Leye; Ndeye Diabou Diagne; Papa Alassane Diaw; Souleymane Mboup; Todd Meyer                                                                                                                                                                                                                                                                                                                                                                                                                                                                                                                                                                                                                                                                                                                                                                                                                                                                                                                                                                                                                                                                                                                                                                                                                                                                                                                                                                    |
| EPI_ISL_1661919, EPI_ISL_1663581                                                                                                                                                                                                                                                                                                                                                      | IU-Cerrahpasa, Cerrahpasa School of Medicine, COVID-19 Lab                     | IU-Cerrahpasa, Cerrahpasa School of Medicine, COVID-19 Lab                                                                                                                                                                                                                                                      | Kenan Midilli; Mert Kuskucu; Yesim Tuyji Tok                                                                                                                                                                                                                                                                                                                                                                                                                                                                                                                                                                                                                                                                                                                                                                                                                                                                                                                                                                                                                                                                                                                                                                                                                                                                                                                                                                                                                                                                                                                                                                                                |
| EPI_ISL_1806250                                                                                                                                                                                                                                                                                                                                                                       | Idaho Bureau of Laboratories                                                   | Center for Global Health, University of New Mexico Health Sciences Center                                                                                                                                                                                                                                       | Christopher Ball; Darrell Dinwiddie; Daryl Domman; Kurt Schwaln; Matthew Burns; Robert Voermans; Valerie Morley                                                                                                                                                                                                                                                                                                                                                                                                                                                                                                                                                                                                                                                                                                                                                                                                                                                                                                                                                                                                                                                                                                                                                                                                                                                                                                                                                                                                                                                                                                                             |
| EPI_ISL_1363182, EPI_ISL_2031610                                                                                                                                                                                                                                                                                                                                                      | Idaho Bureau of Laboratories                                                   | Idaho Bureau of Laboratories                                                                                                                                                                                                                                                                                    | "R. Beukelman; Aimee Ceniseros; Christopher Ball; Christopher Ball"; Matthew Charles Burns; R. Beukelman; Robert L. Voermans                                                                                                                                                                                                                                                                                                                                                                                                                                                                                                                                                                                                                                                                                                                                                                                                                                                                                                                                                                                                                                                                                                                                                                                                                                                                                                                                                                                                                                                                                                                |
| EPI_ISL_1742405, EPI_ISL_1809681, EPI_ISL_2140020, EPI_ISL_2140036, EPI_ISL_2300529                                                                                                                                                                                                                                                                                                   | Illinois Department of Public Health                                           | Illinois Department of Public Health - Chicago Lab                                                                                                                                                                                                                                                              | Ira Heimler; Joel Price; Vineet K. Dhiman                                                                                                                                                                                                                                                                                                                                                                                                                                                                                                                                                                                                                                                                                                                                                                                                                                                                                                                                                                                                                                                                                                                                                                                                                                                                                                                                                                                                                                                                                                                                                                                                   |
| EPI_ISL_1443242, EPI_ISL_2135048                                                                                                                                                                                                                                                                                                                                                      | Illinois Department of Public Health - Springfield Lab                         | Illinois Department of Public Health - Springfield Lab                                                                                                                                                                                                                                                          | Bryan Sim; Gordon McCall                                                                                                                                                                                                                                                                                                                                                                                                                                                                                                                                                                                                                                                                                                                                                                                                                                                                                                                                                                                                                                                                                                                                                                                                                                                                                                                                                                                                                                                                                                                                                                                                                    |
| EPI_ISL_2001062, EPI_ISL_2151339, EPI_ISL_2151340, EPI_ISL_2151341, EPI_ISL_2151342, EPI_ISL_2151343, EPI_ISL_2151344                                                                                                                                                                                                                                                                 | see above                                                                      | Immunology, Noguchi Memorial Institute for Medical Research                                                                                                                                                                                                                                                     | A.W.; Adu, B.; Agbodzi, B.; Appiah-Kubi, J.; Asare; Assane, H.; Awunyo, S.; Bonney; Dagnran, A.; Dorkenoo, A.; Egyir, B.; Halatoko; Issa, Z.; J.K.; K.J.; K.M.; Kossi, K.; Kumordjie, S.; Lamboni, L.; Layibo, Y.; Maman, I.; Mohhtar, Q.; Sadji; Salah, D.; Salou, M.; Y.A.                                                                                                                                                                                                                                                                                                                                                                                                                                                                                                                                                                                                                                                                                                                                                                                                                                                                                                                                                                                                                                                                                                                                                                                                                                                                                                                                                                |
| EPI_ISL_2533903                                                                                                                                                                                                                                                                                                                                                                       | Imágenes Diagnósticas de Mazatlán                                              | Microbial Genomics Laboratory                                                                                                                                                                                                                                                                                   | ; Alejandra García-Gasca; Alejandra Hernández-Terán; Alejandro Sánchez-Flores; Alfredo Herrera-Estrella; Alicia Ocaña-Mondragón; Andreu Comas-García; Angel Gustavo Salas-Lais; Antonio Loza Román; Bernardo Martínez-Miguel; Blanca Taboada; Brenda Irasema Maldonado-Meza; Bruno Gómez-Gil; Carla Ivón Herrera-Najera; Carlos F. Arias; Celia Boukadida; Clara Esperanza Santacruz-Tinoco; Concepción Grajales-Muñiz; Consorcio Mexicano de Vigilancia Genómica (CoViGen-Mex). Authors (in alphabetical order): Julio Elias Alvarado-Yaah; Cristóbal Cháidez-Quiróz; Célida Duque Molina; Célida Martínez- Rodríguez; Daniel Fregoso-Rueda; Daniel Lira Morales; Eduardo Becerril-Vargas; Fernando Fontove-Herrera; Fidencio Mejía-Nepomuceno; Francisco Pulido; Gloria Elena Espinosa-Ayala; Gloria María Molina-Salinas; Gloria Vazquez; Hector Esteban Paz-Juárez; Hector Montoya-Fuentes; Helen Haydee Fernanda Ramirez-Plascencia; Irvin González-López; Jean Pierre González; Jesús Hernández; Joel Armando Vázquez-Pérez.; Jorge Salas-Hernández; José Antonio Enciso-Moreno; José Arturo Martínez-Orozco; José Esteban Muñoz-Medina; José de Jesús Nuñez-Contreras; Juan Bautista Chale-Ozuli; Julissa Enciso-Ibarra; Luis Alberto Ochoa-Carrera; Margarita Matías-Florentino; Mario Mújica-Sánchez; Marissa Perez-García; María Guadalupe Santiago-Mauricio; María Guadalupe de Jesús Míreles-Rivera; Nelly Sélem-Mojica; Pavel Isa; Ricardo Ciria Merce; Ricardo Grande; Rosa María Gutiérrez Rios; Santiago Ávila-Rios; Seline Zárate; Susana Lopez; Verónica Mata-Haro; Victor Eduardo García-Arias; Victor Hugo Borja-Aburto |
| EPI_ISL_1628597, EPI_ISL_1628633, EPI_ISL_1628655                                                                                                                                                                                                                                                                                                                                     | InDRE                                                                          | Instituto Nacional de Medicina Genomica                                                                                                                                                                                                                                                                         | Alcaraz N; Canseco Mendez JC; Cedro-Tanda A; Garcia-Cardenas FJ; Gisela Barrera-Badillo; Gonzalez-Barrera D; Gonzalez-Woge MA; Herrera-Montalvo LA.; Hidalgo-Miranda A; Irma Lopez-Martinez; Jose Ernesto Ramirez González; Mendoza-Vargas A; Miranda-Órtiz H; Munguia-Garza P; Ramirez-Vega O; Rangel-DeLeon D; Reyes-Grajeda JP; Rosas-Escobar P                                                                                                                                                                                                                                                                                                                                                                                                                                                                                                                                                                                                                                                                                                                                                                                                                                                                                                                                                                                                                                                                                                                                                                                                                                                                                          |
| EPI_ISL_476702                                                                                                                                                                                                                                                                                                                                                                        | Incubadora Venezolana de Ciencia, Venezuela                                    | Incubadora Venezolana de Ciencia, Venezuela / Instituto Nacional de Salud, Bogotá, Colombia / Grupo de Investigaciones Microbiológicas-UR (GIMUR), Departamento de Biología, Facultad de Ciencias Naturales, Universidad del Rosario, Bogotá, Colombia / Icahn School of Medicine at Mount Sinai, New York, USA | Alberto Paniz-Mondolfi; Ana S. Gonzalez-Reiche; Angelica Rico; Anibal A. Teherán; Carolina Florez; Carolina Hernández; Emilia Mia Sordillo; Esther C. Barros; Harm van Bakel; Jesús E. Jaimes; Juan David Ramírez; Lisseth Pardo; Lourdes Delgado; Luis Perez-Garcia; Marina Muñoz; Matthew M. Hernandez; Sergio Gomez; Viviana Simon                                                                                                                                                                                                                                                                                                                                                                                                                                                                                                                                                                                                                                                                                                                                                                                                                                                                                                                                                                                                                                                                                                                                                                                                                                                                                                       |
| EPI_ISL_2304357, EPI_ISL_2304405, EPI_ISL_2304415, EPI_ISL_2304444                                                                                                                                                                                                                                                                                                                    | Indiana Animal Disease Diagnostic Laboratory                                   | Carpi Laboratory - Purdue University                                                                                                                                                                                                                                                                            | Abebe A Fola; G Kenitra Hendrix; Giovanna Carpi; Illica I Ciubotariu; Jack Dorman; Jobin J Kattoor; Lev Gorenstein; Nicole M Perry; Rebecca P Wilkes                                                                                                                                                                                                                                                                                                                                                                                                                                                                                                                                                                                                                                                                                                                                                                                                                                                                                                                                                                                                                                                                                                                                                                                                                                                                                                                                                                                                                                                                                        |
| EPI_ISL_1525013                                                                                                                                                                                                                                                                                                                                                                       | Indiana State Department of Health                                             | Quantigen Biosciences                                                                                                                                                                                                                                                                                           | Paul J Childress                                                                                                                                                                                                                                                                                                                                                                                                                                                                                                                                                                                                                                                                                                                                                                                                                                                                                                                                                                                                                                                                                                                                                                                                                                                                                                                                                                                                                                                                                                                                                                                                                            |
| EPI_ISL_884410                                                                                                                                                                                                                                                                                                                                                                        | Infectious Diseases, Quest Diagnostics                                         | Infectious Diseases, Quest Diagnostics                                                                                                                                                                                                                                                                          | Anderson, B.; Bernstein; D.F.; Gerasimova, A.; Hua, M.; K.E.; Kagan; L.E.; Lacbawan, F.; Liu, Y.; Livingston; Owen, R.; R.M.; Rosenthal; S.H.; Shalhout                                                                                                                                                                                                                                                                                                                                                                                                                                                                                                                                                                                                                                                                                                                                                                                                                                                                                                                                                                                                                                                                                                                                                                                                                                                                                                                                                                                                                                                                                     |
| EPI_ISL_2107507, EPI_ISL_2151336, EPI_ISL_2151337                                                                                                                                                                                                                                                                                                                                     | Infectious Diseases, King Faisal Hospital Research Center                      | Infectious Diseases, King Faisal Hospital Research Center                                                                                                                                                                                                                                                       | Al-Qahtani A, A.; Alahideb B, M.; Alhamlan F, S.; Almaghrabi R, S.; Alsanea M; Alsanea M, S.; Althawadi S, I.; Balavenkatesh Mani; Balavenkatesh Mani, M.; M. and UdayaRaja G, K.; Mutabagani M, S.; S. and Alahideb B, M.; UdayaRaja G, K.                                                                                                                                                                                                                                                                                                                                                                                                                                                                                                                                                                                                                                                                                                                                                                                                                                                                                                                                                                                                                                                                                                                                                                                                                                                                                                                                                                                                 |
| EPI_ISL_1587647, EPI_ISL_1803140, EPI_ISL_2013703, EPI_ISL_2087219, EPI_ISL_2087232, EPI_ISL_2087519, EPI_ISL_2087590, EPI_ISL_2087703, EPI_ISL_2087762, EPI_ISL_2088485, EPI_ISL_2089042, EPI_ISL_2089192, EPI_ISL_2089221, EPI_ISL_2089293, EPI_ISL_2186510, EPI_ISL_2186522, EPI_ISL_2186947, EPI_ISL_2187138                                                                      | see above                                                                      | Centers for Disease Control and Prevention Division of Viral Diseases, Pathogen Discovery                                                                                                                                                                                                                       | Adrian Paskey; Benjamin Rambo-Martin; Chirayao Goswami; Christian Bixby; Christopher Gulvick; Clinton R. Paden; Dakota Howard; Darlene Wagner; Dhvani Batra; Duncan MacCannell; Jason Caravas; Jonathan Schultz; Kara Moser; and Matthew Schmerer; Peter W. Cook; Robin Grimwood; Russ Hager; Scott Sammons; Shatavia Morrison; Yihe Wang; Yvette Unoaurnhi                                                                                                                                                                                                                                                                                                                                                                                                                                                                                                                                                                                                                                                                                                                                                                                                                                                                                                                                                                                                                                                                                                                                                                                                                                                                                 |
| EPI_ISL_1908147, EPI_ISL_1908155, EPI_ISL_1909244, EPI_ISL_1909250, EPI_ISL_1909253, EPI_ISL_1912936, EPI_ISL_1913014, EPI_ISL_1913051, EPI_ISL_1913059, EPI_ISL_1913077                                                                                                                                                                                                              | see above                                                                      | Laboratoire de Biotechnologie                                                                                                                                                                                                                                                                                   | Abdelomouni Essabbar; Fatima El Falaki; Fatima ElFalaki; Hicham Oumzil; Lahcen Belyamani and Azeddine Ibrahim; Mohamed Rhajaoui; Mohamed Rhajaoui; Mouna Ouadghiri; Saaïd Amzazi; Tarik Aanniz                                                                                                                                                                                                                                                                                                                                                                                                                                                                                                                                                                                                                                                                                                                                                                                                                                                                                                                                                                                                                                                                                                                                                                                                                                                                                                                                                                                                                                              |
| EPI_ISL_1443003                                                                                                                                                                                                                                                                                                                                                                       | Institut National d'hygiène                                                    | "Unité Mixte Internationale TransVIHMI (UMI 233 IRD – U1175 INSERM - Université de Montpellier) IRD (Institut de recherche pour le développement)"                                                                                                                                                              | Abla A. KONOU; Adodo SADJI; Ahidjo AYOUBA; Akoélé SILIADIN; Alassane OJURO-MEDELI; Amivi EHLAN; Améyo DORKENOU; Anoumou DAGNRA; Christelle BUTEL; Délima MABA; Eric DELAPORTE; Issaka Maman; Kokou TEGUENI; Laetitia SERRANO; Martine PEETERS; Messanh DOUFFAN; Mireille PRINCE-DAVID; Mounerou SALOU; Sidonie A.M.KAGNISODE; Sika DOSSIM; Wembo A. HALATOKO                                                                                                                                                                                                                                                                                                                                                                                                                                                                                                                                                                                                                                                                                                                                                                                                                                                                                                                                                                                                                                                                                                                                                                                                                                                                                |
| EPI_ISL_2278010                                                                                                                                                                                                                                                                                                                                                                       | Institut National d'Hygiène (INH)                                              | Unité Mixte Internationale TransVIHMI (UMI 233 IRD – U1175 INSERM - Université de Montpellier)IRD (Institut de recherche pour le développement)                                                                                                                                                                 | Abla A. KONOU; Adodo SADJI; Ahidjo AYOUBA; Akoélé SILIADIN; Alassane OJURO-MEDELI; Amivi EHLAN; Améyo DORKENOU; Anoumou DAGNRA; Christelle BUTEL; Délima MABA; Eric DELAPORTE; Issaka Maman; Kokou TEGUENI; Laetitia SERRANO; Martine PEETERS; Messanh DOUFFAN; Mireille PRINCE-DAVID; Mounerou SALOU; Sidonie A.M.KAGNISODE; Sika DOSSIM; Wembo A. HALATOKO                                                                                                                                                                                                                                                                                                                                                                                                                                                                                                                                                                                                                                                                                                                                                                                                                                                                                                                                                                                                                                                                                                                                                                                                                                                                                |



|                                                                                                                                                                                                                                                            |                                                                                                                                     |                                                                                                                                                                                                                                |                                                                                                                                                                                                                                                                                                                                                                                                                                                                                                                                                                                                                                                                                                                                                                                                                                                                      |  |  |
|------------------------------------------------------------------------------------------------------------------------------------------------------------------------------------------------------------------------------------------------------------|-------------------------------------------------------------------------------------------------------------------------------------|--------------------------------------------------------------------------------------------------------------------------------------------------------------------------------------------------------------------------------|----------------------------------------------------------------------------------------------------------------------------------------------------------------------------------------------------------------------------------------------------------------------------------------------------------------------------------------------------------------------------------------------------------------------------------------------------------------------------------------------------------------------------------------------------------------------------------------------------------------------------------------------------------------------------------------------------------------------------------------------------------------------------------------------------------------------------------------------------------------------|--|--|
| EPI_ISL_418206, EPI_ISL_418213, EPI_ISL_480783, EPI_ISL_485713                                                                                                                                                                                             | Institut Pasteur Dakar                                                                                                              | Institut Pasteur de Dakar                                                                                                                                                                                                      | Amadou Alpha Sall; Amadou Alpha Sall; Mamadou Diop; Mamadou Malado Jallow; Mamadou diop; Marie Henriette Dior Ndione; Moussa Moise Diagne; Ndongo Dia; Ousmane Faye; Safietou Sanke                                                                                                                                                                                                                                                                                                                                                                                                                                                                                                                                                                                                                                                                                  |  |  |
| EPI_ISL_2110643                                                                                                                                                                                                                                            | Institut Pasteur du Maroc                                                                                                           | Functional Genomics platform/CNRST                                                                                                                                                                                             | Abdelkrim Meziane Bellefquih; Alaoui Sanaa-amine; Chouati Taha; EL FAHIME Elmoustafa; Elannaz Hicham; Ennibi Khalid; Hemlali Mouhsine; MERABET MOUAD; Maaroufi Abderrahmane; Melloui Marouane; NOURLIL Jalal; Touil Nadia; Youbi Mohammed                                                                                                                                                                                                                                                                                                                                                                                                                                                                                                                                                                                                                            |  |  |
| EPI_ISL_955165                                                                                                                                                                                                                                             | Institute for Biocides and Medical Ecology                                                                                          | Institute of microbiology and Immunology, Faculty of Medicine, University of Belgrade                                                                                                                                          | Jankovic, M.; Jovanovic, T.; Knezevic, A.; Milicevic, O.; Sekler, M.; Tesovic, B.; Vidanovic, D.                                                                                                                                                                                                                                                                                                                                                                                                                                                                                                                                                                                                                                                                                                                                                                     |  |  |
| EPI_ISL_1827888                                                                                                                                                                                                                                            | Institute for Health Research, Epidemiological Surveillance and Training (IRESSEF)                                                  | Abbott Laboratories                                                                                                                                                                                                            | Adbou Padane; Ambroise Ahoudi; Aminata Dia; Aminata Mboup; Ana Olivo; Anna julienne selbe Ndiaye; Barbara Harris; Cyrille Diedhiou; Gavin Cloherty; Mary Rodgers; Moustapha Mbow; Nafissatou Leye; Ndeye Diabou Diagne; Papa Alassane Diaw; Souleymane Mboup; Todd Meyer                                                                                                                                                                                                                                                                                                                                                                                                                                                                                                                                                                                             |  |  |
| EPI_ISL_1760647, EPI_ISL_1916510                                                                                                                                                                                                                           | Institute for Infectious Diseases, University of Bern, Switzerland                                                                  | Institute for Infectious Diseases, University of Bern, Switzerland                                                                                                                                                             | Alban Ramette; Christian Baumann; Cora Sägesser; Franziska Suter-Riniker; Miguel A Terrazos Miani; Pascal Bittel; Peter Keller; Stefan Neuenschwander; Stephen L Leib                                                                                                                                                                                                                                                                                                                                                                                                                                                                                                                                                                                                                                                                                                |  |  |
| EPI_ISL_912397, EPI_ISL_1406146, EPI_ISL_1406294                                                                                                                                                                                                           | Institute for Medical Research, Infectious Disease Research Centre, National Institutes of Health, Ministry of Health Malaysia      | Institute for Medical Research, Infectious Disease Research Centre, National Institutes of Health, Ministry of Health Malaysia                                                                                                 | Azizan MA; Kamel K; Mohd Zawawi Z; Ramly N; Robert F; Suppiah J; Thayan R                                                                                                                                                                                                                                                                                                                                                                                                                                                                                                                                                                                                                                                                                                                                                                                            |  |  |
| EPI_ISL_707707, EPI_ISL_2348811                                                                                                                                                                                                                            | Institute for Urban Disease Control and Prevention                                                                                  | COVID-19 Network Investigations (CONI) Alliance                                                                                                                                                                                | Amornmas Kongklieng; Anek Mungaomklang; Angkana Huang; Anthony R. Jones; Arporn Wangwiwatsin; Bhakbhoom Panthan; Chonticha Klungtong; Duangkamon Loesbanluechai; Ekawat Pasomsub; Elizabeth Batty; Insee Sensor; Janjira Thaipadungpanit; Kamolthip Atsawawanunt; Khajohn Joonlasak; Khajohn Joonsalak; Kingkan Rakmanee; Krittikorn Kumpornsin; Namfon Kotanan; Prayuth Kaewmalang; Pukkapor Parnwijitkul; Stefan Fernandez; Thanat Chookajorn; Theerarat Kochakarn; Treewat Watthanachockchai; Vichan Pawun; Wasun Chantratita; Wudtichai Manasatienkij                                                                                                                                                                                                                                                                                                            |  |  |
| EPI_ISL_1209341, EPI_ISL_1209345, EPI_ISL_1583415                                                                                                                                                                                                          | Institute for Water Quality and Resource Management, Technical University Vienna                                                    | Berghaler laboratory, CeMM Research Center for Molecular Medicine of the Austrian Academy of Sciences                                                                                                                          | Andreas Berghaler; Anna Schedl; Bekir Erguner; Benedikt Agerer; Christoph Bock; Fabian Amman; Jan Laine; Lukas Endler; Maelle Le Moing; Martin Senekowitsch; Michael Schuster; Petr Triska; Thomas Penz                                                                                                                                                                                                                                                                                                                                                                                                                                                                                                                                                                                                                                                              |  |  |
| EPI_ISL_918411                                                                                                                                                                                                                                             | Institute of Biocides and Medical Ecology                                                                                           | Virology Department Institute of Microbiology and Immunology Faculty of Medicine University of Belgrade                                                                                                                        | Abazovic Dzihan; Banko Ana; Despot Dragana; Loncar Ana; Milicevic Ongnen; Miljanovic Danijela                                                                                                                                                                                                                                                                                                                                                                                                                                                                                                                                                                                                                                                                                                                                                                        |  |  |
| EPI_ISL_1118849, EPI_ISL_1265328, EPI_ISL_1935543, EPI_ISL_1964279, EPI_ISL_1964351, EPI_ISL_2030196, EPI_ISL_2321813, EPI_ISL_2322223, EPI_ISL_2322290, EPI_ISL_2491984, EPI_ISL_2492325                                                                  | Institute of Microbiology and Immunology, Faculty of Medicine, University of Ljubljana                                              | Institute of Microbiology and Immunology, Faculty of Medicine, University of Ljubljana                                                                                                                                         | Alen Suljić; Andraž Celar; Andrej Celar; Dominika Šturm; Doroteja Vljaj; Mario Poljak; Matic Brvar; Miša Korva; Patricija Pozvek; Samo Zakotnik; Tatjana Avšič – Županc; Tomaž Mark Zorec; Špela Pleh                                                                                                                                                                                                                                                                                                                                                                                                                                                                                                                                                                                                                                                                |  |  |
| EPI_ISL_548946                                                                                                                                                                                                                                             | Institute of Microbiology, University of Veterinary and Animal sciences                                                             | Institute of Microbiology, University of Veterinary and Animal sciences                                                                                                                                                        | Ali; Altaf, I.; Anwar, M.; Ashraf; Asif, A.; Attique; Awan; Aziz; Bhatti; Cheema; Fazel, S.; Hassan, S.; Khan; Khan, N.; M.A.; M.B.; M.M.; M.S.; M.T.; M.U.; M.W.; M.Z.; Mehmood, A.; Mukhtar, N.; N.A.; Nawaz, M.; Rafique, S.; Rana; Raza, S.; S.Q.; S.Z.; Sardar, N.; Sarwar, H.; Shabbir; Shah; Tahir, Z.; Yaqub, T.; Younis                                                                                                                                                                                                                                                                                                                                                                                                                                                                                                                                     |  |  |
| EPI_ISL_583481, EPI_ISL_1234442, EPI_ISL_1239413, EPI_ISL_1547902, EPI_ISL_2444294                                                                                                                                                                         | Institute of Virology, Biomedical Research Center of the Slovak Academy of Sciences, Bratislava                                     | Faculty of Natural Sciences, Comenius University, Bratislava                                                                                                                                                                   | Boris Klempa; Brona Brejova; Broňa Brejová; Dominika Fričová; Edita Staroňová; Elena Tichá; Jozef Nosek; Juraj Kopacek; Juraj Kopáček; Kristína Borsova; Kristína Boršová; Lubomira Lukacikova; Martina Lickova; Martina Ličková; Martina Nebachova; Martina Neboháčová; Monika Slavikova; Monika Sláviková; Sabina Fumacova Havlikova; Sabina Fumačová Havliková; Tomas Vinar; Tomáš Vinař; Viktoría Cabanova; Viktoria Hodorova; Viktória Hodorová; Viktória Čabanová; Ľubomíra Lukáčiková                                                                                                                                                                                                                                                                                                                                                                         |  |  |
| EPI_ISL_1654825, EPI_ISL_1654830, EPI_ISL_1654831, EPI_ISL_1654832, EPI_ISL_1654833, EPI_ISL_1654836, EPI_ISL_1654838, EPI_ISL_1654839, EPI_ISL_1654840                                                                                                    | Institute of Virology, Vaccines and Sera "Torlak"                                                                                   | Institute of microbiology and Immunology, Faculty of Medicine, University of Belgrade                                                                                                                                          | Jankovic, M.; Jovanovic, T.; Knezevic, A.; Milicevic, O.; Sekler, M.; Tesovic, B.; Vidanovic, D.                                                                                                                                                                                                                                                                                                                                                                                                                                                                                                                                                                                                                                                                                                                                                                     |  |  |
| EPI_ISL_837728                                                                                                                                                                                                                                             | Instituto Nacional de Enfermedades Respiratorias (INER)                                                                             | Instituto Nacional de Enfermedades Respiratorias (INER)                                                                                                                                                                        | Alejandra Hernández-Terán; Alma Rincón-Rubio; Celia Boukadida; Edgar Sevilla-Reyes; Eduardo Becerril-Vargas; Fidencio Mejía-Nepomuceno; Hector Esteban Paz-Juárez; Joel Armando Vázquez-Pérez; Jorge Salas-Hernández; José Arturo Martínez-Orozco; Margarita Matías-Florentino; Mario Mújica-Sánchez; Olivia Briceño; Santiago Ávila-Ríos                                                                                                                                                                                                                                                                                                                                                                                                                                                                                                                            |  |  |
| EPI_ISL_1824457                                                                                                                                                                                                                                            | Instituto Nacional de Medicina Genómica                                                                                             | Centro de Investigación en Enfermedades Infecciosas (CIENI), Instituto Nacional de Enfermedades Respiratorias (INER)                                                                                                           | Arriaga-Canon C; Ávila-Ríos S; Boukadida C; Cedro-Tanda A; Herrera-Montalvo LA; Hidalgo-Miranda A; Matías-Florentino M; Mendoza-Vargas A; Perez-García M; Reyes-Grajeda JP; Reyes-Teran G                                                                                                                                                                                                                                                                                                                                                                                                                                                                                                                                                                                                                                                                            |  |  |
| EPI_ISL_933522, EPI_ISL_1181717, EPI_ISL_1591591, EPI_ISL_2350097                                                                                                                                                                                          | Instituto Nacional de Medicina Genómica                                                                                             | Instituto Nacional de Medicina Genómica                                                                                                                                                                                        | Alcaraz N; Canseco Mendez JC; Cedro-Tanda A; Cisneros- Villanueva M; Cisneros-Villanueva M; Escobar-Arrazola; García-Cardenas FJ; Gonzalez-Barrera D; Gonzalez-Woge MA; Herrera-Montalvo LA; Herrera-Montalvo LA.; Hidalgo-Miranda A; M; Mendoza-Vargas A; Miranda-Ortiz H; Munguia-Garza P; Peñañoza-Figueroa F; Ramirez-Vega O; Rangel-DeLeon D; Reyes-Grajeda JP; Rosas-Escobar P; Sifuentes-Rojas C                                                                                                                                                                                                                                                                                                                                                                                                                                                              |  |  |
| EPI_ISL_536486                                                                                                                                                                                                                                             | Instituto Nacional de Salud                                                                                                         | Laboratorio de Infecciones Respiratorias Agudas                                                                                                                                                                                | David Tarazona; Dennis Carhuarica; Eduardo Juscamayta Lopez; Faviola Valdivia Guerrero; Lenin Maturrano Hernandez; Nancy Rojas Serrano; Ronnie Gavilan Chavez                                                                                                                                                                                                                                                                                                                                                                                                                                                                                                                                                                                                                                                                                                        |  |  |
| EPI_ISL_2617094, EPI_ISL_2617103, EPI_ISL_2617120, EPI_ISL_2617127, EPI_ISL_2617139, EPI_ISL_2617149, EPI_ISL_2617152, EPI_ISL_2617155, EPI_ISL_2617168                                                                                                    | Instituto Nacional de Saude (INS), Mozambique                                                                                       | CERI, Centre for Epidemic Response and Innovation, Stellenbosch University and KRISP, KZN Research Innovation and Sequencing Platform, UKZN.                                                                                   | Emmanuel S; Ghandhari J; Nadia Siteo; Nalia Ismael; Nedio Mabunda; Paulo Arnaldo; Pillay S; Tegally H; Wilkinson E; de Oliveira T                                                                                                                                                                                                                                                                                                                                                                                                                                                                                                                                                                                                                                                                                                                                    |  |  |
| EPI_ISL_887437, EPI_ISL_887438, EPI_ISL_887502                                                                                                                                                                                                             | Instituto Nacional de Saude (INS), Mozambique                                                                                       | KRISP, KZN Research Innovation and Sequencing Platform                                                                                                                                                                         | Ghandhari J; Nadia Siteo; Nalia Ismael; Nedio Mabunda; Paulo Arnaldo; Pillay S; Tegally H; Wilkinson E; de Oliveira T                                                                                                                                                                                                                                                                                                                                                                                                                                                                                                                                                                                                                                                                                                                                                |  |  |
| EPI_ISL_693525, EPI_ISL_693610, EPI_ISL_801521, EPI_ISL_1399293, EPI_ISL_1399957, EPI_ISL_1853678, EPI_ISL_2536040, EPI_ISL_2536047, EPI_ISL_2536070, EPI_ISL_2536072, EPI_ISL_2536078, EPI_ISL_2536079, EPI_ISL_2536080, EPI_ISL_2536092, EPI_ISL_2536101 | Instituto Nacional de Saude (INSA)                                                                                                  | Instituto Nacional de Saude (INSA)                                                                                                                                                                                             | Borges et al                                                                                                                                                                                                                                                                                                                                                                                                                                                                                                                                                                                                                                                                                                                                                                                                                                                         |  |  |
| EPI_ISL_2340402, EPI_ISL_2340436                                                                                                                                                                                                                           | Instituto Nacional de Saude (INSA)                                                                                                  | Instituto Nacional de Saude (INSA) and BioSystems & Integrative Sciences Institute (BioISI) Genomics Unit, FCUL                                                                                                                | Borges et al                                                                                                                                                                                                                                                                                                                                                                                                                                                                                                                                                                                                                                                                                                                                                                                                                                                         |  |  |
| EPI_ISL_1853820                                                                                                                                                                                                                                            | Instituto Nacional de Saude (INSA) and Centro de Investigaçao em Biodiversidade e Recursos Geneticos (CIBIO), Universidade do Porto | Instituto Nacional de Saude (INSA) and Centro de Investigaçao em Biodiversidade e Recursos Geneticos (CIBIO), Universidade do Porto                                                                                            | Borges et al                                                                                                                                                                                                                                                                                                                                                                                                                                                                                                                                                                                                                                                                                                                                                                                                                                                         |  |  |
| EPI_ISL_1399855, EPI_ISL_1853605, EPI_ISL_1853624                                                                                                                                                                                                          | Instituto Nacional de Saude (INSA) and Instituto Gulbenkian de Ciencia (IGC)                                                        | Instituto Nacional de Saude (INSA) and Instituto Gulbenkian de Ciencia (IGC)                                                                                                                                                   | Borges et al                                                                                                                                                                                                                                                                                                                                                                                                                                                                                                                                                                                                                                                                                                                                                                                                                                                         |  |  |
| EPI_ISL_2004296, EPI_ISL_2004324                                                                                                                                                                                                                           | Instituto Nacional de Saude (INSA) and i3S - Instituto de Investigaçao e Inovação em Saúde                                          | Instituto Nacional de Saude (INSA)                                                                                                                                                                                             | Borges et al                                                                                                                                                                                                                                                                                                                                                                                                                                                                                                                                                                                                                                                                                                                                                                                                                                                         |  |  |
| EPI_ISL_2004225                                                                                                                                                                                                                                            | Instituto Nacional de Saude (INSA) and i3S - Instituto de Investigaçao e Inovação em Saúde                                          | Instituto Nacional de Saude (INSA) and i3S - Instituto de Investigaçao e Inovação em Saúde                                                                                                                                     | Borges et al                                                                                                                                                                                                                                                                                                                                                                                                                                                                                                                                                                                                                                                                                                                                                                                                                                                         |  |  |
| EPI_ISL_455435, EPI_ISL_872093                                                                                                                                                                                                                             | Instituto de Diagnostico y Referencia Epidemiologicos (INDRE)                                                                       | Instituto de Diagnostico y Referencia Epidemiologicos (INDRE)                                                                                                                                                                  | Abril Rodriguez-Maldonado; Adnan-Araiza Rodríguez; Araiza-Rodriguez Adnan; Barrera-Badillo Gisela; Claudia Wong-Arambula; Dayanira Arellano-Suarez; Edgar Mendieta-Condado; Ernesto Ramirez-Gonzalez; Fabiola Garces-Ayala; Garces-Ayala Fabiola. Taboada Ramirez Blanca. Ramirez-Gonzalez Ernesto; Gisela Barrera-Badillo; Hernandez-Rivas Lucia; Irma Lopez-Martinez.; Lopez-Martinez Irma; Lucia Hernandez-Rivas; Mendieta-Condado Edgar; Natividad Cruz-Ortiz; Rodriguez-Maldonado Abril; Tatiana Nunez-Garcia; Wong-Arambula Claudia                                                                                                                                                                                                                                                                                                                            |  |  |
| EPI_ISL_452139                                                                                                                                                                                                                                             | Instituto de Diagnostico y Referencia Epidemiologicos (INDRE)                                                                       | Instituto de diagnóstico y Referencia Epidemiologicos (INDRE)                                                                                                                                                                  | Araiza-Rodriguez Adnan; Barrera-Badillo Gisela; Garces-Ayala Fabiola; Hernandez-Rivas Lucia; Lopez-Martinez Irma; Mendieta-Condado Edgar; Ramirez-Gonzalez Ernesto; Rodríguez-Maldonado Abril; Wong-Arambula Claudia                                                                                                                                                                                                                                                                                                                                                                                                                                                                                                                                                                                                                                                 |  |  |
| EPI_ISL_913935, EPI_ISL_913947, EPI_ISL_913961, EPI_ISL_933712, EPI_ISL_1054959, EPI_ISL_1054963, EPI_ISL_1054995, EPI_ISL_1168463, EPI_ISL_1168527, EPI_ISL_1168617                                                                                       | Instituto de Diagnostico y Referencia Epidemiologicos INDRE_RNLSP                                                                   | Instituto de Diagnostico y Referencia Epidemiologicos (INDRE)                                                                                                                                                                  | Abril Rodriguez-Maldonado; Adnan Araiza-Rodriguez; Ariadna Medina-Benitez; Claudia Wong-Arambula; David Fragoso-Fonseca; Ernesto Ramirez-Gonzalez.; Fabiola Garces-Ayala; Gisela Barrera-Badillo; Irma Lopez-Martinez; Joaquin Quiroz-Mercado; Lucia Hernandez-Rivas; Mayra Jimenez-Morales; Nancy Munoz-Hernandez; Natividad Cruz-Ortiz; Sergio Rangel-Guerrero; Tatiana Nunez-Garcia; Vanessa Rivero-Arredondo                                                                                                                                                                                                                                                                                                                                                                                                                                                     |  |  |
| EPI_ISL_1301444, EPI_ISL_1301480, EPI_ISL_1301687, EPI_ISL_1302300                                                                                                                                                                                         | Instituto de Diagnostico y Referencia Epidemiologicos INDRE_RNLSP                                                                   | Instituto de Biotecnología de la UNAM                                                                                                                                                                                          | Alejandra Hernández-Terán; Alejandro Sanchez-Flores; Alma Rincón-Rubio; Andrea Santos Coy-Arechavaleta; Authors from IBT; Blanca Taboada; Celia Boukadida; Clara Esperanza Santacruz-Tinoco; Edgar Mendieta-Condado; Eduardo Becerril-Vargas; Fidencio Mejía-Nepomuceno; Francisco Pulido; Gisela Barrera-Badillo; Gloria Vazquez; Hector Esteban Paz-Juárez; IMSS; INDRé and INER (in alphabetical order); Carlos F. Arias; Irma Lopez-Martinez; Jerome Jean Verleyen; joel Armando Vázquez-Pérez; Jorge Salas-Hernández; José Arturo Martínez-Orozco; José Ernesto Ramírez-González; José Esteban Muñoz-Medina; Larissa Fernandes-Matano; Lucia Hernandez-Rivas; Luis Alberto Ochoa-Carrera; Margarita Matías-Florentino; Mario Mújica-Sánchez; Natividad Cruz-Ortiz; Pavel Isa; Ricardo Grande; Santiago Ávila-Ríos; Tatiana Nunez-Garcia; Teresita Rojas-Mendoza |  |  |
| EPI_ISL_1629792, EPI_ISL_1629794, EPI_ISL_1629798, EPI_ISL_1629800, EPI_ISL_1629801, EPI_ISL_1629804, EPI_ISL_1629806                                                                                                                                      | Instituto de Medicina Tropical Alexander Von Humboldt, Universidad Peruana Cayetano Heredia                                         | Laboratorio de Genómica Microbiana, Universidad Peruana Cayetano Heredia                                                                                                                                                       | Alejandra Dávila-Barclay; Diego Cuicapuzá; Guillermo Salvatierra; Janet Huancachoque; Lenin Maturrano; Luis González; Pablo Tsukayama; Pedro E. Romero; Pool Marcos                                                                                                                                                                                                                                                                                                                                                                                                                                                                                                                                                                                                                                                                                                  |  |  |
| EPI_ISL_1652056, EPI_ISL_1652062                                                                                                                                                                                                                           | Integrated Biorepository of H3Africa Uganda – IBRH3AU                                                                               | Molecular Biology Laboratory                                                                                                                                                                                                   | Ashaba Fred Katabazi; Bernard Ssentalo Bagaya; David Patrick Kateete; Edgar Kigozi; Emmanuel Nasinghe; Eric Katagirya; Gerald Mboowa; Lwanga Newton; Misaki Wayengera; Moses Jobola; Moses Luutu; Nsubuga Gideon; Rogers Kamulegeya; Samuel Kirimunda; Sarah Stanley; Savannah Mwesigwa                                                                                                                                                                                                                                                                                                                                                                                                                                                                                                                                                                              |  |  |
| EPI_ISL_2001653                                                                                                                                                                                                                                            | Intrepid Nepal                                                                                                                      | Center for Molecular Dynamics Nepal                                                                                                                                                                                            | Ajit Poudel; Anupama Gurung; Dibesh Karmacharya; Kavya Dhital; Prajwol Manandhar; Rajindra Napit; Roji Raut; Saman Pradhan; Sapana Shakya                                                                                                                                                                                                                                                                                                                                                                                                                                                                                                                                                                                                                                                                                                                            |  |  |
| EPI_ISL_2290665, EPI_ISL_2290666                                                                                                                                                                                                                           | Invicta                                                                                                                             | 1. National Institute of Public Health - National Institute of Hygiene, Warsaw, Poland 2. Biobank Lab, University of Lodz 3. Laboratory of Respiratory Viruses, Teaching and Clinical Center of the Medical University of Lodz | Dominik Strapagiel; Izabela Drózd; Jakub Lach; Katarzyna Zacharczuk; Klaudyna Królikowska; Maciej Borowiec; Magdalena Nowakowska; Magdalena Traczky-Borszyńska; Marcin Słomka; Marta Sobalska-Kwapis; Małgorzata Sadkowska-Todys; Tomasz Płoszaj; Tomasz Wolkowicz                                                                                                                                                                                                                                                                                                                                                                                                                                                                                                                                                                                                   |  |  |
| EPI_ISL_1919422                                                                                                                                                                                                                                            | Ipoh Public Health Laboratory (MKAI), Ministry of Health Malaysia                                                                   | Institute for Medical Research, Infectious Disease Research Centre, National Institutes of Health, Ministry                                                                                                                    | Kamel K; Mohd Zawawi Z; Suppiah J; Thayan R                                                                                                                                                                                                                                                                                                                                                                                                                                                                                                                                                                                                                                                                                                                                                                                                                          |  |  |
| EPI_ISL_1821883, EPI_ISL_2621621                                                                                                                                                                                                                           | Ipoh Public Health Laboratory (MKAI), Ministry of Health Malaysia                                                                   | Institute for Medical Research, Infectious Disease Research Centre, National Institutes of Health, Ministry of Health Malaysia                                                                                                 | Azizan AM; Kamel K; Mohd Zawawi Z; Ramly N; Robert F; Suppiah J; Thayan R                                                                                                                                                                                                                                                                                                                                                                                                                                                                                                                                                                                                                                                                                                                                                                                            |  |  |

|                                                                                                                                                                                                                                                                                                                                                                                                                                                                                                                                                                                 |                                                                                                                                                                                            |                                                                                                                                                                                            |                                                                                                                          |                                                                                                                                                                                                                                                                                                                                                                                                                                                                                                                                                                                                                                                                                                                                                                                                                                                                                                                                                                                |
|---------------------------------------------------------------------------------------------------------------------------------------------------------------------------------------------------------------------------------------------------------------------------------------------------------------------------------------------------------------------------------------------------------------------------------------------------------------------------------------------------------------------------------------------------------------------------------|--------------------------------------------------------------------------------------------------------------------------------------------------------------------------------------------|--------------------------------------------------------------------------------------------------------------------------------------------------------------------------------------------|--------------------------------------------------------------------------------------------------------------------------|--------------------------------------------------------------------------------------------------------------------------------------------------------------------------------------------------------------------------------------------------------------------------------------------------------------------------------------------------------------------------------------------------------------------------------------------------------------------------------------------------------------------------------------------------------------------------------------------------------------------------------------------------------------------------------------------------------------------------------------------------------------------------------------------------------------------------------------------------------------------------------------------------------------------------------------------------------------------------------|
| EPI_ISL_1910386, EPI_ISL_1910387, EPI_ISL_1910388, EPI_ISL_1910390, EPI_ISL_1910391, EPI_ISL_1910392, EPI_ISL_1910393, EPI_ISL_1910394, EPI_ISL_2620888, EPI_ISL_2620889                                                                                                                                                                                                                                                                                                                                                                                                        | see above                                                                                                                                                                                  | Iressef Genomics lab                                                                                                                                                                       | IRSESSEF                                                                                                                 | Abdou PADANE; Ambroise AHOUIDI; Aminata DIA; Aminata MBOUP; Astou Gaye GAYE; Barada CISSE; Bira Him Piere NDIAYE; Diabou Diagne; Gora LO; Khadim GUEYE; Moustapha MBOW; Nafisatou LEYE; Ndeye Coumba Toure KANE; Papa Alassane DIAW; Samba Ndiour; Souleymane MBOUP; Yacine DIA                                                                                                                                                                                                                                                                                                                                                                                                                                                                                                                                                                                                                                                                                                |
| EPI_ISL_1167128                                                                                                                                                                                                                                                                                                                                                                                                                                                                                                                                                                 |                                                                                                                                                                                            | Iressef Genomics lab                                                                                                                                                                       | L'institut de Recherche en Santé, de Surveillance Épidémiologique et de Formation (IRSESSEF)                             | Abdou PADANE; Abdoulie KANTEH; Abdul Karim SESAY; Ambroise AHOUIDI; Aminata DIA; Aminata MBOUP; Astou Gaye GAYE; Barada CISSE; Bira Him Piere NDIAYE; Gora LO; Khadim GUEYE; Moustapha MBOW; Nafisatou LEYE; Ndeye Coumba Toure KANE; Papa Alassane DIAW; Souleymane MBOUP; Yacine DIA                                                                                                                                                                                                                                                                                                                                                                                                                                                                                                                                                                                                                                                                                         |
| EPI_ISL_1298481<br>EPI_ISL_1742834<br>EPI_ISL_2195378<br>EPI_ISL_2195723<br>EPI_ISL_2195974<br>EPI_ISL_2195975<br>EPI_ISL_2204264                                                                                                                                                                                                                                                                                                                                                                                                                                               |                                                                                                                                                                                            | Ivano-Frankivsk CCH#1<br>J.W. Ruby Memorial Hospital                                                                                                                                       | The Institute of Molecular Biology and Genetics of NASU<br>WVU and Marshall University Combined Genomics Core Facilities | M.Tukalo et al.<br>James Denvir; Peter Perrotta; Peter Stoilov; Ryan Percifield; Wesley Kimble                                                                                                                                                                                                                                                                                                                                                                                                                                                                                                                                                                                                                                                                                                                                                                                                                                                                                 |
| EPI_ISL_779276<br>EPI_ISL_779288<br>EPI_ISL_2466716<br>EPI_ISL_2466724<br>EPI_ISL_2466729<br>EPI_ISL_2466732                                                                                                                                                                                                                                                                                                                                                                                                                                                                    | Jamil-ur-Rahman Center for Genome Research, Dr. Panjwani Center for Molecular Medicine and Drug Research                                                                                   | Jamil-ur-Rahman Center for Genome Research, Dr. Panjwani Center for Molecular Medicine and Drug Research                                                                                   |                                                                                                                          | Ain, Nu.; Ansari, S.; B.T.; I.A.; Iqbal, W.; Irfan, M.; Jahan, S.; Javed; Kakar, N.; Khan; Khan, I.; Khan, S.; Nisa, Z.; Rashid, M.; Rehman, Z.; Sarwar, B.; Shakeel, M.; Siddiqi, S.; Zehra, M.                                                                                                                                                                                                                                                                                                                                                                                                                                                                                                                                                                                                                                                                                                                                                                               |
| EPI_ISL_451958                                                                                                                                                                                                                                                                                                                                                                                                                                                                                                                                                                  | Jamil-ur-Rahman Center for Genome Research, Dr. Panjwani Center for Molecular Medicine and Drug Research, International Center for Chemical and Biological Sciences, University of Karachi | Jamil-ur-Rahman Center for Genome Research, Dr. Panjwani Center for Molecular Medicine and Drug Research, International Center for Chemical and Biological Sciences, University of Karachi |                                                                                                                          | B.A.; I.A; Khan; Khan, S.; M.A.and Khan; Qureshi; Raza; S.A.; Shakeel, M.; Zahid, M.                                                                                                                                                                                                                                                                                                                                                                                                                                                                                                                                                                                                                                                                                                                                                                                                                                                                                           |
| EPI_ISL_1468625<br>EPI_ISL_1662783<br>EPI_ISL_2103264<br>EPI_ISL_2331496                                                                                                                                                                                                                                                                                                                                                                                                                                                                                                        | Johns Hopkins Hospital Department of Pathology                                                                                                                                             | Johns Hopkins Hospital Department of Pathology                                                                                                                                             |                                                                                                                          | Adannaya Amadi; C. Paul Morris; Chun Huai Luo; Heba H. Mostafa; Matthew Schwartz; Nicholas Gallagher                                                                                                                                                                                                                                                                                                                                                                                                                                                                                                                                                                                                                                                                                                                                                                                                                                                                           |
| EPI_ISL_2695635, EPI_ISL_2695636, EPI_ISL_2695637, EPI_ISL_2695639, EPI_ISL_2695640, EPI_ISL_2695641, EPI_ISL_2695647, EPI_ISL_2695653, EPI_ISL_2695655, EPI_ISL_2695656, EPI_ISL_2695657, EPI_ISL_2695658, EPI_ISL_2695662, EPI_ISL_2695663, EPI_ISL_2695664, EPI_ISL_2695665, EPI_ISL_2695666, EPI_ISL_2695668, EPI_ISL_2695669, EPI_ISL_2695672, EPI_ISL_2695673, EPI_ISL_2695674, EPI_ISL_2695675, EPI_ISL_2695676, EPI_ISL_2695679, EPI_ISL_2695681, EPI_ISL_2695682, EPI_ISL_2695683, EPI_ISL_2695688, EPI_ISL_2695689, EPI_ISL_2695696, EPI_ISL_2695697, EPI_ISL_2695700 | see above                                                                                                                                                                                  | KIMBERLEY LABORATORY                                                                                                                                                                       | National Institute for Communicable Diseases of the National Health Laboratory Service                                   | Amoako DG; Bhiman JN; Everatt J; Ismail A; Mahlangu B; Mnguni A; Mohale T; Ntuli N; Scheepers C                                                                                                                                                                                                                                                                                                                                                                                                                                                                                                                                                                                                                                                                                                                                                                                                                                                                                |
| EPI_ISL_455639<br>EPI_ISL_1823618                                                                                                                                                                                                                                                                                                                                                                                                                                                                                                                                               | KRISP, KZN Research Innovation and Sequencing Platform<br>KY State Public Health Lab                                                                                                       | KRISP, KZN Research Innovation and Sequencing Platform<br>Centers for Disease Control and Prevention Division of Viral Diseases, Pathogen Discovery                                        |                                                                                                                          | Chimukangara B; Deforche K; Giandhari J; Lessells R; Pillay S; Tegally H; Wilkinson E; de Oliveira T<br>Darlene Wagner; Dave Wentworth; Dhvani Batra; Jasmine Padilla; Justin Lee; Katie Dillon; Krista Queen; Kristen Knipe; Kristine Lacek; Mark Burroughs; Matthew Schmerer; Mili Sheth; Peter Cook; Sam Shepard; Sarah Nobles; Shoshona Le; Suxiang Tong; Vivien Dugan; Yvette Unoarumhi                                                                                                                                                                                                                                                                                                                                                                                                                                                                                                                                                                                   |
| EPI_ISL_2658984<br>EPI_ISL_510833<br>EPI_ISL_1805463<br>EPI_ISL_1805464<br>EPI_ISL_1857081<br>EPI_ISL_2007100<br>EPI_ISL_2534247                                                                                                                                                                                                                                                                                                                                                                                                                                                | Kaiser Santa Clara<br>Kalmar klinisk mikrobiologi<br>Kansas Health and Environmental Lab                                                                                                   | Santa Clara County Public Health Laboratory<br>The Public Health Agency of Sweden<br>Kansas Health and Environmental Lab                                                                   |                                                                                                                          | Santa Clara County Public Health Department<br>Anna Risberg; Anna-Malin Linde; Karin Tegmark-Wisell; Maria Lind Karlberg; Mattias Haukland; Mia Brytting; Olov Svartstrom; Oskar Karlsson Lindsjö; Petra Edquist; Reza Advani; Sandra Brodsson<br>Ben Olsen; Jonathan Barnell; Katherine Wiggins; Mike Grose; and Phil Adam                                                                                                                                                                                                                                                                                                                                                                                                                                                                                                                                                                                                                                                    |
| EPI_ISL_1748173<br>EPI_ISL_1791065<br>EPI_ISL_1791066                                                                                                                                                                                                                                                                                                                                                                                                                                                                                                                           | Kantonsarztamt Solothurn<br>Kantonsspital Baden AG                                                                                                                                         | Clinical Bacteriology<br>Institute of Medical Virology, University of Zurich                                                                                                               |                                                                                                                          | Adrian Egli; Alfredo Mari; Fanny Wegner; Fenner; Hans Hirsch; Helena MB Seth-Smith; Julia Bielicki; Karoline Leuzinger; Lukas; Madlen Stange; Manuel Battegay; Tim Roloff<br>Alexandra Trkola; Annette Audigé; Cyril Shah; Gabriela Ziltener; Guido Bloemberg; Jon Huder; Jürg Böni; Kevin Steiner; Maria Grünberg; Maryam Zaheri; Michael Huber; Riccarda Capaul; Stefan Schmutz; Verena Kufner                                                                                                                                                                                                                                                                                                                                                                                                                                                                                                                                                                               |
| EPI_ISL_1859481                                                                                                                                                                                                                                                                                                                                                                                                                                                                                                                                                                 | Kazan Federal University, Academic Consortium                                                                                                                                              | FEDERAL RESEARCH AND CLINICAL CENTER OF PHYSICAL-CHEMICAL MEDICINE OF FEDERAL MEDICAL BIOLOGICAL AGENCY, Academic Consortium                                                               |                                                                                                                          | Alexander Manolov; Alexander Pavlenko; Alexander Rumyantsev; Alexander Samoilov; Alexander Troitsky; Alexander Tulichev; Alexander Vasiliev; Alexey Volnukhin; Alla Petrova; Andrey Koritsky; Anna Blagonravova; Anna Varizhuk; Daria Boldyreva; Daria Kharlamieva; Daria Matyushkina; Dmitry Fedorov; Dmitry Pushkar; Ekaterina Moskaleva; Elena Galova; Elena Ilina; Elizaveta Orlova; Galina Trifonova; Goukhar Yusubalieva; Ilshat Gafurov; Irina Shirokova; Konstantin Ivanov; Konstantin Kolontarev; Ksenia Klimina; Larisa Balykova; Lyubov Rychkova; Nadezhda Kolyskina; Natalia Pozhenko; Oleg Ogarkov; Pavel Bashkirov; Polina Khromova; Polina Tikhonova; Ramiz Bakhtyev; Raushaniya Gaifullina; Sergey Rumyantsev; Svetlana Solovieva; Vadim Govorun; Valentin Manuvera; Varvara Musarova; Vasily Lazarev; Vladimir Baklaushiev; Vladimir Rumyantsev; Vladimir Veselovsky; Vladislav Babenko; Vyacheslav Kurapatkin; Vyacheslav Sinkov; Yulia Galeeva; Yuri Udalov |
| EPI_ISL_1122013<br>EPI_ISL_510869<br>EPI_ISL_2333636                                                                                                                                                                                                                                                                                                                                                                                                                                                                                                                            | Kentucky State Public Health Lab<br>Klinisk mikrobiologi NAL Trollhattan<br>Klinisk mikrobiologi, Region Västerbotten                                                                      | Kentucky State Public Health Lab<br>The Public Health Agency of Sweden<br>CBRN Defence and Security, Swedish Defence Research Agency                                                       |                                                                                                                          | Joshua Tobias; Karim George; Matthew Johnson; Rachel Zinner; Rhonda Lucas; Stephanie Lunn; Vaneet Arora; William Grooms<br>Anna Risberg; Anna-Malin Linde; Karin Tegmark-Wisell; Maria Lind Karlberg; Mattias Haukland; Mia Brytting; Olov Svartstrom; Oskar Karlsson Lindsjö; Petra Edquist; Reza Advani; Sandra Brodsson<br>Andreas Sjödin; Anna-Lena Johansson; Annika Allard; Annika Osterman; Caroline Öhrman; David Sundell; Emelie Näslund Salomonsson; Ingrid Dacklin; Jonas Näslund; Kerstin Myrtennäs; Linda Karlsson; Malin Granberg; Mats Forsman; Stina Bäckman                                                                                                                                                                                                                                                                                                                                                                                                   |
| EPI_ISL_1298485<br>EPI_ISL_2229272                                                                                                                                                                                                                                                                                                                                                                                                                                                                                                                                              | Kosov CRH<br>LA Office of Public Health Laboratories                                                                                                                                       | The Institute of Molecular Biology and Genetics of NASU<br>Centers for Disease Control and Prevention Division of Viral Diseases, Pathogen Discovery                                       |                                                                                                                          | M.Tukalo et al.<br>Alison Laufer Halpin; Ben L. Rambo-Martin; Clinton R. Paden; Dakota Howard; Darlene Wagner; Dave Wentworth; Dhvani Batra; Jasmine Padilla; Justin Lee; Katie Dillon; Krista Queen; Kristen Knipe; Kristine Lacek; Mark Burroughs; Matthew Schmerer; Mili Sheth; Peter Cook; Sam Shepard; Sarah Nobles; Shoshona Le; Suxiang Tong; Vivien Dugan; Yvette Unoarumhi                                                                                                                                                                                                                                                                                                                                                                                                                                                                                                                                                                                            |
| EPI_ISL_1318264                                                                                                                                                                                                                                                                                                                                                                                                                                                                                                                                                                 | LA Office of Public Health Laboratories                                                                                                                                                    | Genomics and Discovery, Respiratory Viruses Branch, Division of Viral Diseases, Centers for Disease Control and Prevention                                                                 |                                                                                                                          | Anna Kelleher; Anna Uehara; Brian Lynch; Clinton R. Paden; Halbin Wang; Han Jia Justin Ng; Jing Zhang; Krista Queen; Peter Cook; Suxiang Tong; Yan Li; Ying Tao                                                                                                                                                                                                                                                                                                                                                                                                                                                                                                                                                                                                                                                                                                                                                                                                                |
| EPI_ISL_1941773<br>EPI_ISL_1539136                                                                                                                                                                                                                                                                                                                                                                                                                                                                                                                                              | LA SOURCE<br>LABORATORIUM BADAŃ KLINICZNYCH WSSE w OPOLU                                                                                                                                   | Laboratory of genomics and metagenomics<br>1. National Institute of Public Health - National Institute of Hygiene; 2. Eurofins Genomics Europe Sequencing GmbH                             |                                                                                                                          | Claire Bertelli; Damien Jacot; Gilbert Greub; Sebastien Aebys; Trestan Pillonel<br>ECDC COVID-19 WGS support team; Eurofins Genomics Europe Sequencing Team; Gierczyński Rafał; Sadkowska-Todys Małgorzata; Wolkowicz Tomasz; Zacharczuk Katarzyna                                                                                                                                                                                                                                                                                                                                                                                                                                                                                                                                                                                                                                                                                                                             |
| EPI_ISL_2433867                                                                                                                                                                                                                                                                                                                                                                                                                                                                                                                                                                 | LANCET, LABORATORIES                                                                                                                                                                       | National Institute for Communicable Diseases of the National Health Laboratory Service                                                                                                     |                                                                                                                          | Amoako DG; Bhiman JN; Ismail A; Mahlangu B; Mohale T; Ntuli N; Scheepers C                                                                                                                                                                                                                                                                                                                                                                                                                                                                                                                                                                                                                                                                                                                                                                                                                                                                                                     |
| EPI_ISL_1516786<br>EPI_ISL_2443047<br>EPI_ISL_2545705<br>EPI_ISL_2545807                                                                                                                                                                                                                                                                                                                                                                                                                                                                                                        | LESP Aguascalientes<br>LESP Baja California                                                                                                                                                | Instituto de Diagnostico y Referencia Epidemiologicos (INDRE)<br>Instituto de Diagnostico y Referencia Epidemiologicos (INDRE)                                                             |                                                                                                                          | Abril Rodriguez-Maldonado; Ariadna Medina-Benitez; Claudia Wong-Arambula; Ernesto Ramirez-Gonzalez.; Gisela Barrera-Badillo; Irma Lopez-Martinez; Joaquin Quiroz-Mercado; Lucia Hernandez-Rivas; Natividad Cruz-Ortiz; Sergio Rangel-Guerrero; Tatiana Nunez-Garcia; Vanessa Rivero-Arredondo<br>Abril Rodriguez-Maldonado; Ariadna Medina-Benitez; Claudia Wong-Arambula; Ernesto Ramirez-Gonzalez.; Gisela Barrera-Badillo; Irma Lopez-Martinez; Joaquin Quiroz-Mercado; Lucia Hernandez-Rivas; Natividad Cruz-Ortiz; Sergio Rangel-Guerrero; Tatiana Nunez-Garcia; Vanessa Rivero-Arredondo                                                                                                                                                                                                                                                                                                                                                                                 |
| EPI_ISL_1805487                                                                                                                                                                                                                                                                                                                                                                                                                                                                                                                                                                 | LESP Baja California Sur                                                                                                                                                                   | Instituto de Diagnostico y Referencia Epidemiologicos (INDRE)                                                                                                                              |                                                                                                                          | Abril Rodriguez-Maldonado; Ariadna Medina-Benitez; Claudia Wong-Arambula; Ernesto Ramirez-Gonzalez.; Gisela Barrera-Badillo; Irma Lopez-Martinez; Joaquin Quiroz-Mercado; Lucia Hernandez-Rivas; Natividad Cruz-Ortiz; Sergio Rangel-Guerrero; Tatiana Nunez-Garcia; Vanessa Rivero-Arredondo                                                                                                                                                                                                                                                                                                                                                                                                                                                                                                                                                                                                                                                                                  |
| EPI_ISL_1400299<br>EPI_ISL_2094512                                                                                                                                                                                                                                                                                                                                                                                                                                                                                                                                              | LESP Campeche                                                                                                                                                                              | Instituto de Diagnostico y Referencia Epidemiologicos (INDRE)                                                                                                                              |                                                                                                                          | Abril Rodriguez-Maldonado; Ariadna Medina-Benitez; Claudia Wong-Arambula; Ernesto Ramirez-Gonzalez.; Gisela Barrera-Badillo; Irma Lopez-Martinez; Joaquin Quiroz-Mercado; Lucia Hernandez-Rivas; Natividad Cruz-Ortiz; Sergio Rangel-Guerrero; Tatiana Nunez-Garcia; Vanessa Rivero-Arredondo                                                                                                                                                                                                                                                                                                                                                                                                                                                                                                                                                                                                                                                                                  |
| EPI_ISL_2343024                                                                                                                                                                                                                                                                                                                                                                                                                                                                                                                                                                 | LESP Chiapas                                                                                                                                                                               | Instituto de Diagnostico y Referencia Epidemiologicos (INDRE)                                                                                                                              |                                                                                                                          | Abril Rodriguez-Maldonado; Ariadna Medina-Benitez; Claudia Wong-Arambula; Ernesto Ramirez-Gonzalez.; Gisela Barrera-Badillo; Irma Lopez-Martinez; Joaquin Quiroz-Mercado; Lucia Hernandez-Rivas; Natividad Cruz-Ortiz; Sergio Rangel-Guerrero; Tatiana Nunez-Garcia; Vanessa Rivero-Arredondo                                                                                                                                                                                                                                                                                                                                                                                                                                                                                                                                                                                                                                                                                  |
| EPI_ISL_1558791                                                                                                                                                                                                                                                                                                                                                                                                                                                                                                                                                                 | LESP Chihuahua                                                                                                                                                                             | Instituto de Diagnostico y Referencia Epidemiologicos (INDRE)                                                                                                                              |                                                                                                                          | Abril Rodriguez-Maldonado; Ariadna Medina-Benitez; Claudia Wong-Arambula; Ernesto Ramirez-Gonzalez.; Gisela Barrera-Badillo; Irma Lopez-Martinez; Joaquin Quiroz-Mercado; Lucia Hernandez-Rivas; Natividad Cruz-Ortiz; Sergio Rangel-Guerrero; Tatiana Nunez-Garcia; Vanessa Rivero-Arredondo                                                                                                                                                                                                                                                                                                                                                                                                                                                                                                                                                                                                                                                                                  |
| EPI_ISL_2101901                                                                                                                                                                                                                                                                                                                                                                                                                                                                                                                                                                 | LESP Coahuila                                                                                                                                                                              | Instituto de Diagnostico y Referencia Epidemiologicos (INDRE)                                                                                                                              |                                                                                                                          | Abril Rodriguez-Maldonado; Ariadna Medina-Benitez; Claudia Wong-Arambula; Ernesto Ramirez-Gonzalez.; Gisela Barrera-Badillo; Irma Lopez-Martinez; Joaquin Quiroz-Mercado; Lucia Hernandez-Rivas; Natividad Cruz-Ortiz; Sergio Rangel-Guerrero; Tatiana Nunez-Garcia; Vanessa Rivero-Arredondo                                                                                                                                                                                                                                                                                                                                                                                                                                                                                                                                                                                                                                                                                  |
| EPI_ISL_2455980                                                                                                                                                                                                                                                                                                                                                                                                                                                                                                                                                                 | LESP Colima                                                                                                                                                                                | Instituto de Diagnostico y Referencia Epidemiologicos (INDRE)                                                                                                                              |                                                                                                                          | Abril Rodriguez-Maldonado; Ariadna Medina-Benitez; Claudia Wong-Arambula; Ernesto Ramirez-Gonzalez.; Gisela Barrera-Badillo; Irma Lopez-Martinez; Joaquin Quiroz-Mercado; Lucia Hernandez-Rivas; Natividad Cruz-Ortiz; Sergio Rangel-Guerrero; Tatiana Nunez-Garcia; Vanessa Rivero-Arredondo                                                                                                                                                                                                                                                                                                                                                                                                                                                                                                                                                                                                                                                                                  |
| EPI_ISL_2545805                                                                                                                                                                                                                                                                                                                                                                                                                                                                                                                                                                 | LESP Durango                                                                                                                                                                               | Instituto de Diagnostico y Referencia Epidemiologicos (INDRE)                                                                                                                              |                                                                                                                          | Abril Rodriguez-Maldonado; Ariadna Medina-Benitez; Claudia Wong-Arambula; Ernesto Ramirez-Gonzalez.; Gisela Barrera-Badillo; Irma Lopez-Martinez; Joaquin Quiroz-Mercado; Lucia Hernandez-Rivas; Natividad Cruz-Ortiz; Sergio Rangel-Guerrero; Tatiana Nunez-Garcia; Vanessa Rivero-Arredondo                                                                                                                                                                                                                                                                                                                                                                                                                                                                                                                                                                                                                                                                                  |
| EPI_ISL_1340616<br>EPI_ISL_2341011                                                                                                                                                                                                                                                                                                                                                                                                                                                                                                                                              | LESP Guanajuato                                                                                                                                                                            | Instituto de Diagnostico y Referencia Epidemiologicos (INDRE)                                                                                                                              |                                                                                                                          | Abril Rodriguez-Maldonado; Ariadna Medina-Benitez; Claudia Wong-Arambula; Ernesto Ramirez-Gonzalez.; Gisela Barrera-Badillo; Irma Lopez-Martinez; Joaquin Quiroz-Mercado; Lucia Hernandez-Rivas; Natividad Cruz-Ortiz; Sergio Rangel-Guerrero; Tatiana Nunez-Garcia; Vanessa Rivero-Arredondo                                                                                                                                                                                                                                                                                                                                                                                                                                                                                                                                                                                                                                                                                  |
| EPI_ISL_1673265<br>EPI_ISL_2495988                                                                                                                                                                                                                                                                                                                                                                                                                                                                                                                                              | LESP Guerrero                                                                                                                                                                              | Instituto de Diagnostico y Referencia Epidemiologicos (INDRE)                                                                                                                              |                                                                                                                          | Abril Rodriguez-Maldonado; Ariadna Medina-Benitez; Claudia Wong-Arambula; Ernesto Ramirez-Gonzalez.; Gisela Barrera-Badillo; Irma Lopez-Martinez; Joaquin Quiroz-Mercado; Lucia Hernandez-Rivas; Natividad Cruz-Ortiz; Sergio Rangel-Guerrero; Tatiana Nunez-Garcia; Vanessa Rivero-Arredondo                                                                                                                                                                                                                                                                                                                                                                                                                                                                                                                                                                                                                                                                                  |
| EPI_ISL_1424008<br>EPI_ISL_1661541<br>EPI_ISL_1805483                                                                                                                                                                                                                                                                                                                                                                                                                                                                                                                           | LESP Hidalgo                                                                                                                                                                               | Instituto de Diagnostico y Referencia Epidemiologicos (INDRE)                                                                                                                              |                                                                                                                          | Abril Rodriguez-Maldonado; Ariadna Medina-Benitez; Claudia Wong-Arambula; Ernesto Ramirez-Gonzalez.; Gisela Barrera-Badillo; Irma Lopez-Martinez; Joaquin Quiroz-Mercado; Lucia Hernandez-Rivas; Natividad Cruz-Ortiz; Sergio Rangel-Guerrero; Tatiana Nunez-Garcia; Vanessa Rivero-Arredondo                                                                                                                                                                                                                                                                                                                                                                                                                                                                                                                                                                                                                                                                                  |
| EPI_ISL_1405908<br>EPI_ISL_2094505<br>EPI_ISL_2101905                                                                                                                                                                                                                                                                                                                                                                                                                                                                                                                           | LESP Jalisco                                                                                                                                                                               | Instituto de Diagnostico y Referencia Epidemiologicos (INDRE)                                                                                                                              |                                                                                                                          | Abril Rodriguez-Maldonado; Ariadna Medina-Benitez; Claudia Wong-Arambula; Ernesto Ramirez-Gonzalez.; Gisela Barrera-Badillo; Irma Lopez-Martinez; Joaquin Quiroz-Mercado; Lucia Hernandez-Rivas; Natividad Cruz-Ortiz; Sergio Rangel-Guerrero; Tatiana Nunez-Garcia; Vanessa Rivero-Arredondo                                                                                                                                                                                                                                                                                                                                                                                                                                                                                                                                                                                                                                                                                  |
| EPI_ISL_1558830                                                                                                                                                                                                                                                                                                                                                                                                                                                                                                                                                                 | LESP Jalisco/UdeG                                                                                                                                                                          | Instituto de Diagnostico y Referencia Epidemiologicos (INDRE)                                                                                                                              |                                                                                                                          | Abril Rodriguez-Maldonado; Ariadna Medina-Benitez; Claudia Wong-Arambula; Ernesto Ramirez-Gonzalez.; Gisela Barrera-Badillo; Irma Lopez-Martinez; Joaquin Quiroz-Mercado; Lucia Hernandez-Rivas; Natividad Cruz-Ortiz; Sergio Rangel-Guerrero; Tatiana Nunez-Garcia; Vanessa Rivero-Arredondo                                                                                                                                                                                                                                                                                                                                                                                                                                                                                                                                                                                                                                                                                  |

|                                                                                                                                                                                                                                                                                                                                                                                                                                                                                                                                                                           |                                                                      |                                                                                                                                                                       |                                                                                                                                                                                                                                                                                                                                                                                                                                                                                                                                                                                                                                                                                                                                                                                                                                                                                                                                                                                                                                                                                                                                                                                                                                                                                                                                                                                                                                                                                                                                                                                                                           |                                                                                                                                                                                                                                                                                                                                                                                                                                                                                                                                                                                                                                                                                                                                                                                                                                                                                                                                                                                                                                                                                                                                                                                                                                                                                                                                                                                                                                                                                                                                                                                                                                                                                         |
|---------------------------------------------------------------------------------------------------------------------------------------------------------------------------------------------------------------------------------------------------------------------------------------------------------------------------------------------------------------------------------------------------------------------------------------------------------------------------------------------------------------------------------------------------------------------------|----------------------------------------------------------------------|-----------------------------------------------------------------------------------------------------------------------------------------------------------------------|---------------------------------------------------------------------------------------------------------------------------------------------------------------------------------------------------------------------------------------------------------------------------------------------------------------------------------------------------------------------------------------------------------------------------------------------------------------------------------------------------------------------------------------------------------------------------------------------------------------------------------------------------------------------------------------------------------------------------------------------------------------------------------------------------------------------------------------------------------------------------------------------------------------------------------------------------------------------------------------------------------------------------------------------------------------------------------------------------------------------------------------------------------------------------------------------------------------------------------------------------------------------------------------------------------------------------------------------------------------------------------------------------------------------------------------------------------------------------------------------------------------------------------------------------------------------------------------------------------------------------|-----------------------------------------------------------------------------------------------------------------------------------------------------------------------------------------------------------------------------------------------------------------------------------------------------------------------------------------------------------------------------------------------------------------------------------------------------------------------------------------------------------------------------------------------------------------------------------------------------------------------------------------------------------------------------------------------------------------------------------------------------------------------------------------------------------------------------------------------------------------------------------------------------------------------------------------------------------------------------------------------------------------------------------------------------------------------------------------------------------------------------------------------------------------------------------------------------------------------------------------------------------------------------------------------------------------------------------------------------------------------------------------------------------------------------------------------------------------------------------------------------------------------------------------------------------------------------------------------------------------------------------------------------------------------------------------|
| EPI_ISL_2246831, EPI_ISL_2545702                                                                                                                                                                                                                                                                                                                                                                                                                                                                                                                                          | LESP Michoacan                                                       | Instituto de Diagnostico y Referencia Epidemiologicos (INDRE)                                                                                                         | Abril Rodriguez-Maldonado; Ariadna Medina-Benitez; Claudia Wong-Arambula; Ernesto Ramirez-Gonzalez.; Gisela Barrera-Badillo; Irma Lopez-Martinez; Joaquin Quiroz-Mercado; Lucia Hernandez-Rivas; Natividad Cruz-Ortiz; Sergio Rangel-Guerrero; Tatiana Nunez-Garcia; Vanessa Rivero-Arredondo                                                                                                                                                                                                                                                                                                                                                                                                                                                                                                                                                                                                                                                                                                                                                                                                                                                                                                                                                                                                                                                                                                                                                                                                                                                                                                                             |                                                                                                                                                                                                                                                                                                                                                                                                                                                                                                                                                                                                                                                                                                                                                                                                                                                                                                                                                                                                                                                                                                                                                                                                                                                                                                                                                                                                                                                                                                                                                                                                                                                                                         |
| EPI_ISL_1400303, EPI_ISL_1400308, EPI_ISL_1710967, EPI_ISL_2296094                                                                                                                                                                                                                                                                                                                                                                                                                                                                                                        | LESP Morelos                                                         | Instituto de Diagnostico y Referencia Epidemiologicos (INDRE)                                                                                                         | Abril Rodriguez-Maldonado; Ariadna Medina-Benitez; Claudia Wong-Arambula; Ernesto Ramirez-Gonzalez.; Gisela Barrera-Badillo; Irma Lopez-Martinez; Joaquin Quiroz-Mercado; Lucia Hernandez-Rivas; Natividad Cruz-Ortiz; Sergio Rangel-Guerrero; Tatiana Nunez-Garcia; Vanessa Rivero-Arredondo                                                                                                                                                                                                                                                                                                                                                                                                                                                                                                                                                                                                                                                                                                                                                                                                                                                                                                                                                                                                                                                                                                                                                                                                                                                                                                                             |                                                                                                                                                                                                                                                                                                                                                                                                                                                                                                                                                                                                                                                                                                                                                                                                                                                                                                                                                                                                                                                                                                                                                                                                                                                                                                                                                                                                                                                                                                                                                                                                                                                                                         |
| EPI_ISL_1483041                                                                                                                                                                                                                                                                                                                                                                                                                                                                                                                                                           | LESP Nayarit                                                         | Instituto de Diagnostico y Referencia Epidemiologicos (INDRE)                                                                                                         | Abril Rodriguez-Maldonado; Ariadna Medina-Benitez; Claudia Wong-Arambula; Ernesto Ramirez-Gonzalez.; Gisela Barrera-Badillo; Irma Lopez-Martinez; Joaquin Quiroz-Mercado; Lucia Hernandez-Rivas; Natividad Cruz-Ortiz; Sergio Rangel-Guerrero; Tatiana Nunez-Garcia; Vanessa Rivero-Arredondo                                                                                                                                                                                                                                                                                                                                                                                                                                                                                                                                                                                                                                                                                                                                                                                                                                                                                                                                                                                                                                                                                                                                                                                                                                                                                                                             |                                                                                                                                                                                                                                                                                                                                                                                                                                                                                                                                                                                                                                                                                                                                                                                                                                                                                                                                                                                                                                                                                                                                                                                                                                                                                                                                                                                                                                                                                                                                                                                                                                                                                         |
| EPI_ISL_1365648, EPI_ISL_1516771, EPI_ISL_1661555, EPI_ISL_1661563                                                                                                                                                                                                                                                                                                                                                                                                                                                                                                        | LESP Nuevo Leon                                                      | Instituto de Diagnostico y Referencia Epidemiologicos (INDRE)                                                                                                         | Abril Rodriguez-Maldonado; Ariadna Medina-Benitez; Claudia Wong-Arambula; Ernesto Ramirez-Gonzalez.; Gisela Barrera-Badillo; Irma Lopez-Martinez; Joaquin Quiroz-Mercado; Lucia Hernandez-Rivas; Natividad Cruz-Ortiz; Sergio Rangel-Guerrero; Tatiana Nunez-Garcia; Vanessa Rivero-Arredondo                                                                                                                                                                                                                                                                                                                                                                                                                                                                                                                                                                                                                                                                                                                                                                                                                                                                                                                                                                                                                                                                                                                                                                                                                                                                                                                             |                                                                                                                                                                                                                                                                                                                                                                                                                                                                                                                                                                                                                                                                                                                                                                                                                                                                                                                                                                                                                                                                                                                                                                                                                                                                                                                                                                                                                                                                                                                                                                                                                                                                                         |
| EPI_ISL_2157331                                                                                                                                                                                                                                                                                                                                                                                                                                                                                                                                                           | LESP Oaxaca                                                          | Instituto de Diagnostico y Referencia Epidemiologicos (INDRE)                                                                                                         | Abril Rodriguez-Maldonado; Ariadna Medina-Benitez; Claudia Wong-Arambula; Ernesto Ramirez-Gonzalez.; Gisela Barrera-Badillo; Irma Lopez-Martinez; Joaquin Quiroz-Mercado; Lucia Hernandez-Rivas; Natividad Cruz-Ortiz; Sergio Rangel-Guerrero; Tatiana Nunez-Garcia; Vanessa Rivero-Arredondo                                                                                                                                                                                                                                                                                                                                                                                                                                                                                                                                                                                                                                                                                                                                                                                                                                                                                                                                                                                                                                                                                                                                                                                                                                                                                                                             |                                                                                                                                                                                                                                                                                                                                                                                                                                                                                                                                                                                                                                                                                                                                                                                                                                                                                                                                                                                                                                                                                                                                                                                                                                                                                                                                                                                                                                                                                                                                                                                                                                                                                         |
| EPI_ISL_2340953                                                                                                                                                                                                                                                                                                                                                                                                                                                                                                                                                           | LESP Puebla                                                          | Instituto de Diagnostico y Referencia Epidemiologicos (INDRE)                                                                                                         | Abril Rodriguez-Maldonado; Ariadna Medina-Benitez; Claudia Wong-Arambula; Ernesto Ramirez-Gonzalez.; Gisela Barrera-Badillo; Irma Lopez-Martinez; Joaquin Quiroz-Mercado; Lucia Hernandez-Rivas; Natividad Cruz-Ortiz; Sergio Rangel-Guerrero; Tatiana Nunez-Garcia; Vanessa Rivero-Arredondo                                                                                                                                                                                                                                                                                                                                                                                                                                                                                                                                                                                                                                                                                                                                                                                                                                                                                                                                                                                                                                                                                                                                                                                                                                                                                                                             |                                                                                                                                                                                                                                                                                                                                                                                                                                                                                                                                                                                                                                                                                                                                                                                                                                                                                                                                                                                                                                                                                                                                                                                                                                                                                                                                                                                                                                                                                                                                                                                                                                                                                         |
| EPI_ISL_1424021, EPI_ISL_1558795, EPI_ISL_1821132, EPI_ISL_2455898, EPI_ISL_2455906, EPI_ISL_2455961, EPI_ISL_2495926, EPI_ISL_2495959, EPI_ISL_2545720                                                                                                                                                                                                                                                                                                                                                                                                                   | see above                                                            | LESP Queretaro                                                                                                                                                        | Instituto de Diagnostico y Referencia Epidemiologicos (INDRE)                                                                                                                                                                                                                                                                                                                                                                                                                                                                                                                                                                                                                                                                                                                                                                                                                                                                                                                                                                                                                                                                                                                                                                                                                                                                                                                                                                                                                                                                                                                                                             | Abril Rodriguez-Maldonado; Ariadna Medina-Benitez; Claudia Wong-Arambula; Ernesto Ramirez-Gonzalez.; Gisela Barrera-Badillo; Irma Lopez-Martinez; Joaquin Quiroz-Mercado; Lucia Hernandez-Rivas; Natividad Cruz-Ortiz; Sergio Rangel-Guerrero; Tatiana Nunez-Garcia; Vanessa Rivero-Arredondo                                                                                                                                                                                                                                                                                                                                                                                                                                                                                                                                                                                                                                                                                                                                                                                                                                                                                                                                                                                                                                                                                                                                                                                                                                                                                                                                                                                           |
| EPI_ISL_2559454                                                                                                                                                                                                                                                                                                                                                                                                                                                                                                                                                           | LESP San Luis Potosi                                                 | Instituto de Diagnostico y Referencia Epidemiologicos (INDRE)                                                                                                         | Abril Rodriguez-Maldonado; Ariadna Medina-Benitez; Claudia Wong-Arambula; Ernesto Ramirez-Gonzalez.; Gisela Barrera-Badillo; Irma Lopez-Martinez; Joaquin Quiroz-Mercado; Lucia Hernandez-Rivas; Natividad Cruz-Ortiz; Sergio Rangel-Guerrero; Tatiana Nunez-Garcia; Vanessa Rivero-Arredondo                                                                                                                                                                                                                                                                                                                                                                                                                                                                                                                                                                                                                                                                                                                                                                                                                                                                                                                                                                                                                                                                                                                                                                                                                                                                                                                             |                                                                                                                                                                                                                                                                                                                                                                                                                                                                                                                                                                                                                                                                                                                                                                                                                                                                                                                                                                                                                                                                                                                                                                                                                                                                                                                                                                                                                                                                                                                                                                                                                                                                                         |
| EPI_ISL_1337389, EPI_ISL_2496013                                                                                                                                                                                                                                                                                                                                                                                                                                                                                                                                          | LESP Sinaloa                                                         | Instituto de Diagnostico y Referencia Epidemiologicos (INDRE)                                                                                                         | Abril Rodriguez-Maldonado; Ariadna Medina-Benitez; Claudia Wong-Arambula; Ernesto Ramirez-Gonzalez.; Gisela Barrera-Badillo; Irma Lopez-Martinez; Joaquin Quiroz-Mercado; Lucia Hernandez-Rivas; Natividad Cruz-Ortiz; Sergio Rangel-Guerrero; Tatiana Nunez-Garcia; Vanessa Rivero-Arredondo                                                                                                                                                                                                                                                                                                                                                                                                                                                                                                                                                                                                                                                                                                                                                                                                                                                                                                                                                                                                                                                                                                                                                                                                                                                                                                                             |                                                                                                                                                                                                                                                                                                                                                                                                                                                                                                                                                                                                                                                                                                                                                                                                                                                                                                                                                                                                                                                                                                                                                                                                                                                                                                                                                                                                                                                                                                                                                                                                                                                                                         |
| EPI_ISL_1821193, EPI_ISL_2495979                                                                                                                                                                                                                                                                                                                                                                                                                                                                                                                                          | LESP Tabasco                                                         | Instituto de Diagnostico y Referencia Epidemiologicos (INDRE)                                                                                                         | Abril Rodriguez-Maldonado; Ariadna Medina-Benitez; Claudia Wong-Arambula; Ernesto Ramirez-Gonzalez.; Gisela Barrera-Badillo; Irma Lopez-Martinez; Joaquin Quiroz-Mercado; Lucia Hernandez-Rivas; Natividad Cruz-Ortiz; Sergio Rangel-Guerrero; Tatiana Nunez-Garcia; Vanessa Rivero-Arredondo                                                                                                                                                                                                                                                                                                                                                                                                                                                                                                                                                                                                                                                                                                                                                                                                                                                                                                                                                                                                                                                                                                                                                                                                                                                                                                                             |                                                                                                                                                                                                                                                                                                                                                                                                                                                                                                                                                                                                                                                                                                                                                                                                                                                                                                                                                                                                                                                                                                                                                                                                                                                                                                                                                                                                                                                                                                                                                                                                                                                                                         |
| EPI_ISL_1424041                                                                                                                                                                                                                                                                                                                                                                                                                                                                                                                                                           | LESP Tamaulipas                                                      | Instituto de Diagnostico y Referencia Epidemiologicos (INDRE)                                                                                                         | Abril Rodriguez-Maldonado; Ariadna Medina-Benitez; Claudia Wong-Arambula; Ernesto Ramirez-Gonzalez.; Gisela Barrera-Badillo; Irma Lopez-Martinez; Joaquin Quiroz-Mercado; Lucia Hernandez-Rivas; Natividad Cruz-Ortiz; Sergio Rangel-Guerrero; Tatiana Nunez-Garcia; Vanessa Rivero-Arredondo                                                                                                                                                                                                                                                                                                                                                                                                                                                                                                                                                                                                                                                                                                                                                                                                                                                                                                                                                                                                                                                                                                                                                                                                                                                                                                                             |                                                                                                                                                                                                                                                                                                                                                                                                                                                                                                                                                                                                                                                                                                                                                                                                                                                                                                                                                                                                                                                                                                                                                                                                                                                                                                                                                                                                                                                                                                                                                                                                                                                                                         |
| EPI_ISL_1821166                                                                                                                                                                                                                                                                                                                                                                                                                                                                                                                                                           | LESP Tlaxcala                                                        | Instituto de Diagnostico y Referencia Epidemiologicos (INDRE)                                                                                                         | Abril Rodriguez-Maldonado; Ariadna Medina-Benitez; Claudia Wong-Arambula; Ernesto Ramirez-Gonzalez.; Gisela Barrera-Badillo; Irma Lopez-Martinez; Joaquin Quiroz-Mercado; Lucia Hernandez-Rivas; Natividad Cruz-Ortiz; Sergio Rangel-Guerrero; Tatiana Nunez-Garcia; Vanessa Rivero-Arredondo                                                                                                                                                                                                                                                                                                                                                                                                                                                                                                                                                                                                                                                                                                                                                                                                                                                                                                                                                                                                                                                                                                                                                                                                                                                                                                                             |                                                                                                                                                                                                                                                                                                                                                                                                                                                                                                                                                                                                                                                                                                                                                                                                                                                                                                                                                                                                                                                                                                                                                                                                                                                                                                                                                                                                                                                                                                                                                                                                                                                                                         |
| EPI_ISL_1366666, EPI_ISL_2340908, EPI_ISL_2340927                                                                                                                                                                                                                                                                                                                                                                                                                                                                                                                         | LESP Yucatan                                                         | Instituto de Diagnostico y Referencia Epidemiologicos (INDRE)                                                                                                         | Abril Rodriguez-Maldonado; Ariadna Medina-Benitez; Claudia Wong-Arambula; Ernesto Ramirez-Gonzalez.; Gisela Barrera-Badillo; Irma Lopez-Martinez; Joaquin Quiroz-Mercado; Lucia Hernandez-Rivas; Natividad Cruz-Ortiz; Sergio Rangel-Guerrero; Tatiana Nunez-Garcia; Vanessa Rivero-Arredondo                                                                                                                                                                                                                                                                                                                                                                                                                                                                                                                                                                                                                                                                                                                                                                                                                                                                                                                                                                                                                                                                                                                                                                                                                                                                                                                             |                                                                                                                                                                                                                                                                                                                                                                                                                                                                                                                                                                                                                                                                                                                                                                                                                                                                                                                                                                                                                                                                                                                                                                                                                                                                                                                                                                                                                                                                                                                                                                                                                                                                                         |
| EPI_ISL_2495971, EPI_ISL_2495973                                                                                                                                                                                                                                                                                                                                                                                                                                                                                                                                          | LESP Zacatecas                                                       | Instituto de Diagnostico y Referencia Epidemiologicos (INDRE)                                                                                                         | Abril Rodriguez-Maldonado; Ariadna Medina-Benitez; Claudia Wong-Arambula; Ernesto Ramirez-Gonzalez.; Gisela Barrera-Badillo; Irma Lopez-Martinez; Joaquin Quiroz-Mercado; Lucia Hernandez-Rivas; Natividad Cruz-Ortiz; Sergio Rangel-Guerrero; Tatiana Nunez-Garcia; Vanessa Rivero-Arredondo                                                                                                                                                                                                                                                                                                                                                                                                                                                                                                                                                                                                                                                                                                                                                                                                                                                                                                                                                                                                                                                                                                                                                                                                                                                                                                                             |                                                                                                                                                                                                                                                                                                                                                                                                                                                                                                                                                                                                                                                                                                                                                                                                                                                                                                                                                                                                                                                                                                                                                                                                                                                                                                                                                                                                                                                                                                                                                                                                                                                                                         |
| EPI_ISL_1700833                                                                                                                                                                                                                                                                                                                                                                                                                                                                                                                                                           | LESPZacatecas                                                        | Instituto de Diagnostico y Referencia Epidemiologicos (INDRE)                                                                                                         | Abril Rodriguez-Maldonado; Ariadna Medina-Benitez; Claudia Wong-Arambula; Ernesto Ramirez-Gonzalez.; Gisela Barrera-Badillo; Irma Lopez-Martinez; Joaquin Quiroz-Mercado; Lucia Hernandez-Rivas; Natividad Cruz-Ortiz; Sergio Rangel-Guerrero; Tatiana Nunez-Garcia; Vanessa Rivero-Arredondo                                                                                                                                                                                                                                                                                                                                                                                                                                                                                                                                                                                                                                                                                                                                                                                                                                                                                                                                                                                                                                                                                                                                                                                                                                                                                                                             |                                                                                                                                                                                                                                                                                                                                                                                                                                                                                                                                                                                                                                                                                                                                                                                                                                                                                                                                                                                                                                                                                                                                                                                                                                                                                                                                                                                                                                                                                                                                                                                                                                                                                         |
| EPI_ISL_579031, EPI_ISL_2695351                                                                                                                                                                                                                                                                                                                                                                                                                                                                                                                                           | LSUHS Emerging Viral Threat Laboratory<br>Lab Dra Celeste Formosinho | Microbial Genome Sequencing Center<br>Instituto Nacional de Saude (INSA)                                                                                              | Andrew D. Yurochko; Christopher G. Kevil; Daniel J. Snyder; Jeremy P. Kamil; John A. Vanchiere; Katarzyna Zwiolinska; Maarten Van Diest; Malgorzata Bienkowska-Haba; Martin J. Sapp; Rona S. Scott; Vaughn S. Cooper<br>Borges et al                                                                                                                                                                                                                                                                                                                                                                                                                                                                                                                                                                                                                                                                                                                                                                                                                                                                                                                                                                                                                                                                                                                                                                                                                                                                                                                                                                                      |                                                                                                                                                                                                                                                                                                                                                                                                                                                                                                                                                                                                                                                                                                                                                                                                                                                                                                                                                                                                                                                                                                                                                                                                                                                                                                                                                                                                                                                                                                                                                                                                                                                                                         |
| EPI_ISL_456382, EPI_ISL_456390, EPI_ISL_548084, EPI_ISL_579425, EPI_ISL_637089, EPI_ISL_877212, EPI_ISL_1016867, EPI_ISL_1172029, EPI_ISL_1172030, EPI_ISL_1172032, EPI_ISL_1250705, EPI_ISL_1250710, EPI_ISL_1315314, EPI_ISL_1315323, EPI_ISL_1469103, EPI_ISL_1621294, EPI_ISL_1621296, EPI_ISL_1621303, EPI_ISL_1621312, EPI_ISL_1621314, EPI_ISL_1621315, EPI_ISL_1621316, EPI_ISL_1621323, EPI_ISL_1621324, EPI_ISL_1621325, EPI_ISL_1904849, EPI_ISL_1904852, EPI_ISL_1904857, EPI_ISL_1967902, EPI_ISL_2103202, EPI_ISL_2406487, EPI_ISL_2406490, EPI_ISL_2406495 | see above                                                            | LabPLUS                                                                                                                                                               | Institute of Environmental Science and Research (ESR)                                                                                                                                                                                                                                                                                                                                                                                                                                                                                                                                                                                                                                                                                                                                                                                                                                                                                                                                                                                                                                                                                                                                                                                                                                                                                                                                                                                                                                                                                                                                                                     | Anja Werno; Antje van der Linden; Arlo Upton; Chris Mansell; David Hammer; Dragana Drinkovic; Erasmus Smit; Gary McAuliffe; Hana Sofia Andersson; Hermes Perez; James Ussher; Jill Sherwood; Jing Wang; Joep de Ligt; Josh Freeman; Julia Howard; Juliet Elvy; Lauren Jelly; Mary DeAlmeida; Matt Blakiston; Matt Storey; Matthew Rogers; Max Bloomfield; Michael Addidle; Michelle Balm; Muhammad Faisal; Nikki Freed; Olin Silander; Olivia Stroeven; Rachel Boyle; Sally Roberts; SallyAnn Harbison; Sarah Jefferies; Sharmini Muttiahay; Susan Morpeth; Susan Taylor; Timothy Blackmore; Vani Sathayendran; Veronica Playle; Virginia Hope; Xiaoyun Ren                                                                                                                                                                                                                                                                                                                                                                                                                                                                                                                                                                                                                                                                                                                                                                                                                                                                                                                                                                                                                             |
| EPI_ISL_1113757                                                                                                                                                                                                                                                                                                                                                                                                                                                                                                                                                           | LabTests                                                             | Institute of Environmental Science and Research (ESR)                                                                                                                 | Anja Werno; Antje van der Linden; Arlo Upton; Chris Mansell; David Hammer; Dragana Drinkovic; Erasmus Smit; Gary McAuliffe; Hana Sofia Andersson; Hermes Perez; James Ussher; Jill Sherwood; Jing Wang; Joep de Ligt; Josh Freeman; Julia Howard; Juliet Elvy; Lauren Jelly; Mary DeAlmeida; Matt Blakiston; Matt Storey; Matthew Rogers; Max Bloomfield; Michael Addidle; Michelle Balm; Muhammad Faisal; Nikki Freed; Olin Silander; Olivia Stroeven; Rachel Boyle; Sally Roberts; SallyAnn Harbison; Sarah Jefferies; Sharmini Muttiahay; Susan Morpeth; Susan Taylor; Timothy Blackmore; Vani Sathayendran; Veronica Playle; Virginia Hope; Xiaoyun Ren                                                                                                                                                                                                                                                                                                                                                                                                                                                                                                                                                                                                                                                                                                                                                                                                                                                                                                                                                               |                                                                                                                                                                                                                                                                                                                                                                                                                                                                                                                                                                                                                                                                                                                                                                                                                                                                                                                                                                                                                                                                                                                                                                                                                                                                                                                                                                                                                                                                                                                                                                                                                                                                                         |
| EPI_ISL_1219949, EPI_ISL_1219962, EPI_ISL_1219963, EPI_ISL_2188484, EPI_ISL_2188485, EPI_ISL_2188486, EPI_ISL_2188487, EPI_ISL_2188488, EPI_ISL_2188489                                                                                                                                                                                                                                                                                                                                                                                                                   | see above                                                            | Labo Analyses Med                                                                                                                                                     | National Reference Center for Viruses of Respiratory Infections, Institut Pasteur, Paris                                                                                                                                                                                                                                                                                                                                                                                                                                                                                                                                                                                                                                                                                                                                                                                                                                                                                                                                                                                                                                                                                                                                                                                                                                                                                                                                                                                                                                                                                                                                  | Adamou Lagare; Angela Brisebarre; Camille Capel; Christophe Malabat; Corinne Maufrays; Durivault JÉRÔME; Etienne Simon-Lorière; Frédéric Lemoine; Gael Millot; Louise Lefrançois; Marion Barbet; Maud Vanpeene; Méline Bizard; Sylvie Behillili; Sylvie Van der Werf; Sylvie van der Werf; Vincent Enouf                                                                                                                                                                                                                                                                                                                                                                                                                                                                                                                                                                                                                                                                                                                                                                                                                                                                                                                                                                                                                                                                                                                                                                                                                                                                                                                                                                                |
| EPI_ISL_1508944, EPI_ISL_1508947, EPI_ISL_1508949, EPI_ISL_1509098, EPI_ISL_1509100                                                                                                                                                                                                                                                                                                                                                                                                                                                                                       | Laboratoire Biolim/FSS/UL                                            | Unité Mixte Internationale TransVHMI (UMI 233 IRD - U1175 INSERM - Université de Montpellier) IRD (Institut de recherche pour le développement)                       | Abla A. KONOU; Adodo SADJI; Ahidjo AYOUBA; Akoélé SILIADIN; Alassane OURO-MEDEL; Amivi EHLAN; Améyo DORKENOU; Anoumou DAGNRA; Christelle BUTEL; Délima MABA; Eric DELAPORTE; Issaka Maman; Kokou TEGUENI; Koku AGBODEKA; Laetitia SERRANO; Martine PEETERS; Messanh DOUFFAN; Mireille PRINCE-DAVID; Mounerou SALOU; Sidonie A.M.KAGNISSODE; Sika DOSSIM; Syntyche DEVATCHAGNI; Wembo A. HALATOKO                                                                                                                                                                                                                                                                                                                                                                                                                                                                                                                                                                                                                                                                                                                                                                                                                                                                                                                                                                                                                                                                                                                                                                                                                          |                                                                                                                                                                                                                                                                                                                                                                                                                                                                                                                                                                                                                                                                                                                                                                                                                                                                                                                                                                                                                                                                                                                                                                                                                                                                                                                                                                                                                                                                                                                                                                                                                                                                                         |
| EPI_ISL_2318037, EPI_ISL_2318899                                                                                                                                                                                                                                                                                                                                                                                                                                                                                                                                          | Laboratoire Central de Virologie                                     | Laboratoire de Biotechnologie                                                                                                                                         | Abdelmunim Essabbar; Amal Zouaki; Ghizlane EL Amin; Hakima Kabaj; Lahcen Belyamani and Azeddine Ibrahim; Mouna Ouadghiri; Myriam Seffar; Saaid Amzazi; Tarik Aanniz                                                                                                                                                                                                                                                                                                                                                                                                                                                                                                                                                                                                                                                                                                                                                                                                                                                                                                                                                                                                                                                                                                                                                                                                                                                                                                                                                                                                                                                       |                                                                                                                                                                                                                                                                                                                                                                                                                                                                                                                                                                                                                                                                                                                                                                                                                                                                                                                                                                                                                                                                                                                                                                                                                                                                                                                                                                                                                                                                                                                                                                                                                                                                                         |
| EPI_ISL_1895101, EPI_ISL_1904295, EPI_ISL_1904876                                                                                                                                                                                                                                                                                                                                                                                                                                                                                                                         | Laboratoire central de Virologie                                     | Laboratoire de Biotechnologie                                                                                                                                         | Abdelmunim Essabbar; Amal Zouaki; Ghizlane EL Amin; Hakima Kabaj; Lahcen Belyamani and Azeddine Ibrahim; Mouna Ouadghiri; Myriam Seffar; Saaid Amzazi; Tarik Aanniz                                                                                                                                                                                                                                                                                                                                                                                                                                                                                                                                                                                                                                                                                                                                                                                                                                                                                                                                                                                                                                                                                                                                                                                                                                                                                                                                                                                                                                                       |                                                                                                                                                                                                                                                                                                                                                                                                                                                                                                                                                                                                                                                                                                                                                                                                                                                                                                                                                                                                                                                                                                                                                                                                                                                                                                                                                                                                                                                                                                                                                                                                                                                                                         |
| EPI_ISL_1197037                                                                                                                                                                                                                                                                                                                                                                                                                                                                                                                                                           | Laboratoire de virologie clinique - Institut Pasteur de Tunis        | 1-Laboratory of Microbiology, National Reference Lab, Charles Nicolle Hospital; 2-University of Tunis ElManar, Faculty of Medicine of Tunis, LR99ES09, Tunis, Tunisia | Alia BenKahla; Anissa Chouikha; Fares Wasfi; Henda Triki; Ilhem Boutiba-Ben Boubaker.; Imen Kacem; Ines Mdini; Jalila Ben Khelli; Maher Kharrat; Manel Ben Sassi; Mariem Gdoura; Mouna Ben Sassi; Mouna Safer; Nissaf Ben Alaya; Riadh Daghfous; Riadh Gouider; Roua Ben Othman; Salma Abid; Sameh Trabelsi; Sana Ferjani; Sara Chammam; Sondes Haddad                                                                                                                                                                                                                                                                                                                                                                                                                                                                                                                                                                                                                                                                                                                                                                                                                                                                                                                                                                                                                                                                                                                                                                                                                                                                    |                                                                                                                                                                                                                                                                                                                                                                                                                                                                                                                                                                                                                                                                                                                                                                                                                                                                                                                                                                                                                                                                                                                                                                                                                                                                                                                                                                                                                                                                                                                                                                                                                                                                                         |
| EPI_ISL_2036262, EPI_ISL_2036263, EPI_ISL_2036264, EPI_ISL_2036265, EPI_ISL_2036266, EPI_ISL_2036267, EPI_ISL_2036268, EPI_ISL_2036269                                                                                                                                                                                                                                                                                                                                                                                                                                    | see above                                                            | Laboratori de Referencia de Catalunya                                                                                                                                 | Laboratori de Referencia de Catalunya                                                                                                                                                                                                                                                                                                                                                                                                                                                                                                                                                                                                                                                                                                                                                                                                                                                                                                                                                                                                                                                                                                                                                                                                                                                                                                                                                                                                                                                                                                                                                                                     | Bellosillo B.; Canal M.; Hernandez JJ.; Padilla E.; Ramirez A.; Vilas A.                                                                                                                                                                                                                                                                                                                                                                                                                                                                                                                                                                                                                                                                                                                                                                                                                                                                                                                                                                                                                                                                                                                                                                                                                                                                                                                                                                                                                                                                                                                                                                                                                |
| EPI_ISL_1661978, EPI_ISL_1662201                                                                                                                                                                                                                                                                                                                                                                                                                                                                                                                                          | Laboratorio Central de Epidemiología (LCE)                           | Unidad de Genómica Avanzada                                                                                                                                           | Alejandro Sanchez-Flores; Alfredo Herrera-Estrella; Alicia Ocana-Mondragon; Angel Gustavo Salas-Lais; Bernardo Martínez-Miguel; Blanca Taboada; Brenda Irasema Maldonado-Meza; Carla Ivon Herrera-Najera; Carlos F. Arias; Celia Boukadida; Celida Duque Molina; Clara Esperanza Santacruz-Tinoco; Concepcion Grajales-Muniz; Consorcio Mexicano de Vigilancia Genómica (CoViGen-Mex). Authors (in alphabetical order): Julio Elias Alvarado-Yaah; Fernando Fontove-Herrera; Francisco Pulido; Gloria Elena Espinoza-Ayala; Gloria Maria Molina-Salinas; Gloria Vazquez; Hector Esteban Paz-Juarez; Hector Montoya-Fuentes; Helen Haydee Fernanda Ramirez-Plascencia; Jose Antonio Enciso-Moreno; Jose Esteban Munoz-Medina; Jose de Jesus Nunez-Contreras; Juan Bautista Chale-Dzul; Luis Alberto Ochoa-Carrera; Margarita Matias-Florentino; Maria Guadalupe Santiago-Mauricio; Maria Guadalupe de Jesus Mireles-Rivera; Nelly Selem-Mojica; Pavel Isa; Ricardo Grande; Santiago Ávila-Rios; Victor Eduardo Garcia-Arias; Victor Hugo Borja-Aburto                                                                                                                                                                                                                                                                                                                                                                                                                                                                                                                                                                      |                                                                                                                                                                                                                                                                                                                                                                                                                                                                                                                                                                                                                                                                                                                                                                                                                                                                                                                                                                                                                                                                                                                                                                                                                                                                                                                                                                                                                                                                                                                                                                                                                                                                                         |
| EPI_ISL_1351883, EPI_ISL_1351905                                                                                                                                                                                                                                                                                                                                                                                                                                                                                                                                          | Laboratorio Central de Epidemiologãa (LCE)                           | Unidad de Genómica Avanzada                                                                                                                                           | Alejandro Sanchez-Flores; Alfredo Herrera-Estrella; Alicia Ocana-Mondragon; Angel Gustavo Salas-Lais; Bernardo Martínez-Miguel; Blanca Taboada; Brenda Irasema Maldonado-Meza; Carla Ivon Herrera-Najera; Carlos F. Arias; Celia Boukadida; Clara Esperanza Santacruz-Tinoco; Concepción Grajales-Muñiz; Consorcio Mexicano de Vigilancia Genómica (CoViGen-Mex). Authors (in alphabetical order): Julio Elias Alvarado-Yaah; Fernando Fontove-Herrera; Francisco Pulido; Gloria Elena Espinoza-Ayala; Gloria Maria Molina-Salinas; Gloria Vazquez; Hector Esteban Paz-Juárez; Hector Montoya-Fuentes; Helen Haydee Fernanda Ramirez-Plascencia; Jose Antonio Enciso-Moreno; Jose Esteban Muñoz-Medina; Jose de Jesus Nunez-Contreras; Juan Bautista Chale-Dzul; Luis Alberto Ochoa-Carrera; Margarita Matias-Florentino; Maria Guadalupe Santiago-Mauricio; Maria Guadalupe de Jesus Mireles-Rivera; Nelly Selem-Mojica; Pavel Isa; Ricardo Grande; Santiago Ávila-Rios; Victor Hugo Borja-Aburto                                                                                                                                                                                                                                                                                                                                                                                                                                                                                                                                                                                                                        |                                                                                                                                                                                                                                                                                                                                                                                                                                                                                                                                                                                                                                                                                                                                                                                                                                                                                                                                                                                                                                                                                                                                                                                                                                                                                                                                                                                                                                                                                                                                                                                                                                                                                         |
| EPI_ISL_2091427, EPI_ISL_2490543, EPI_ISL_2490582                                                                                                                                                                                                                                                                                                                                                                                                                                                                                                                         | Laboratorio Central de Epidemiología (LCE)                           | Centro de Investigación en Enfermedades Infecciosas (CIENI), Instituto Nacional de Enfermedades Respiratorias (INER)                                                  | ; Alejandra García-Gasca; Alejandra Hernández-Terán; Alejandro Sanchez-Flores; Alfredo Herrera-Estrella; Alicia Ocaña-Mondragón; Andreu Comas-García; Angel Gustavo Salas-Lais; Antonio Loza Román; Bernardo Martínez-Miguel; Blanca Taboada; Brenda Irasema Maldonado-Meza; Bruno Gomez-Gil; Carla Ivón Herrera-Najera; Carlos F. Arias; Celia Boukadida; Clara Esperanza Santacruz-Tinoco; Concepción Grajales-Muñiz; Consorcio Mexicano de Vigilancia Genómica (CoViGen-Mex). Authors (in alphabetical order): Julio Elias Alvarado-Yaah; Cristóbal Cháidez-Quiróz; Célida Duque Molina; Célida Duque-Molina; Célida Martínez- Rodríguez; Daniel Fregoso-Rueda; Daniel Lira Morales; Eduardo Becerri-Vargas; Fernando Fontove-Herrera; Fidencio Mejía-Nepomuceno; Francisco Pulido; Gloria Elena Espinoza-Ayala; Gloria Maria Molina-Salinas; Gloria Vazquez; Hector Esteban Paz-Juárez; Hector Montoya-Fuentes; Helen Haydee Fernanda Ramirez-Plascencia; Irvin González-López; Jean Pierre González; Joel Armando Vázquez-Pérez.; Jorge Salas-Hernández; José Antonio Enciso-Moreno; José Arturo Martínez-Orozco; José Esteban Muñoz-Medina; José de Jesús Nuñez-Contreras; Juan Bautista Chale-Dzul; Julissa Enciso-Ibarra; Luis Alberto Ochoa-Carrera; Margarita Matias-Florentino; Mario Mújica-Sánchez; Marissa Perez-Garcia; Maria Guadalupe Santiago-Mauricio; Maria Guadalupe de Jesús Mireles-Rivera; Nelly Sélem-Mojica; Pavel Isa; Ricardo Ciriá Merce; Ricardo Grande; Rosa María Gutiérrez Rios; Santiago Ávila-Rios; Selene Zárate; Susana Lopez; Victor Eduardo Garcia-Arias; Victor Hugo Borja-Aburto |                                                                                                                                                                                                                                                                                                                                                                                                                                                                                                                                                                                                                                                                                                                                                                                                                                                                                                                                                                                                                                                                                                                                                                                                                                                                                                                                                                                                                                                                                                                                                                                                                                                                                         |
| EPI_ISL_1279269, EPI_ISL_1279416, EPI_ISL_1279426, EPI_ISL_1279461, EPI_ISL_1279560, EPI_ISL_1279562, EPI_ISL_1279565, EPI_ISL_1279585, EPI_ISL_1279590, EPI_ISL_1585595, EPI_ISL_1585619, EPI_ISL_1585626                                                                                                                                                                                                                                                                                                                                                                | see above                                                            | Laboratorio Central de Epidemiología (LCE)                                                                                                                            | Instituto Nacional de Enfermedades Respiratorias (INER); Centro de Investigación en Enfermedades Infecciosas (CIENI)                                                                                                                                                                                                                                                                                                                                                                                                                                                                                                                                                                                                                                                                                                                                                                                                                                                                                                                                                                                                                                                                                                                                                                                                                                                                                                                                                                                                                                                                                                      | Alejandro Sanchez-Flores; Alfredo Herrera-Estrella; Alicia Ocaña-Mondragón; Angel Gustavo Salas-Lais; Bernardo Martínez-Miguel; Blanca Taboada; Brenda Irasema Maldonado-Meza; Carla Ivón Herrera-Najera; Carlos F. Arias; Celia Boukadida; Clara Esperanza Santacruz-Tinoco; Concepción Grajales-Muñiz; Consorcio Mexicano de Vigilancia Genómica (CoViGen-Mex). Authors (in alphabetical order): Julio Elias Alvarado-Yaah; Célida Duque Molina; Fernando Fontove-Herrera; Francisco Pulido; Gloria Elena Espinoza-Ayala; Gloria Elena Espinoza-Ayala; Gloria Maria Molina-Salinas; Gloria Vazquez; Hector Esteban Paz-Juárez; Hector Montoya-Fuentes; Helen Haydee Fernanda Ramirez-Plascencia; Jose Antonio Enciso-Moreno; Jose Esteban Muñoz-Medina; Jose de Jesus Nunez-Contreras; Juan Bautista Chale-Dzul; Luis Alberto Ochoa-Carrera; Margarita Matias-Florentino; Maria Guadalupe Santiago-Mauricio; Maria Guadalupe de Jesús Mireles-Rivera; Nelly Sélem-Mojica; Pavel Isa; Ricardo Grande; Santiago Ávila-Rios; Victor Eduardo Garcia-Arias; Victor Hugo Borja-Aburto                                                                                                                                                                                                                                                                                                                                                                                                                                                                                                                                                                                                       |
| EPI_ISL_1288416, EPI_ISL_1416385, EPI_ISL_1416553, EPI_ISL_1416559, EPI_ISL_1416628, EPI_ISL_1416630, EPI_ISL_1416662, EPI_ISL_1811379, EPI_ISL_1811475, EPI_ISL_2391618, EPI_ISL_2391649, EPI_ISL_2391651                                                                                                                                                                                                                                                                                                                                                                | see above                                                            | Laboratorio Central de Epidemiología (LCE)                                                                                                                            | Instituto de Biotecnología de la UNAM                                                                                                                                                                                                                                                                                                                                                                                                                                                                                                                                                                                                                                                                                                                                                                                                                                                                                                                                                                                                                                                                                                                                                                                                                                                                                                                                                                                                                                                                                                                                                                                     | ; Alejandra García-Gasca; Alejandra Hernández-Terán; Alejandro Sanchez-Flores; Alfredo Herrera-Estrella; Alicia Ocaña-Mondragón; Andreu Comas-García; Angel Gustavo Salas-Lais; Antonio Loza Román; Bernardo Martínez-Miguel; Blanca Taboada; Brenda Irasema Maldonado-Meza; Bruno Gomez-Gil; Carla Ivón Herrera-Najera; Carlos F. Arias; Celia Boukadida; Clara Esperanza Santacruz-Tinoco; Concepción Grajales-Muñiz; Consorcio Mexicano de Vigilancia Genómica (CoViGen-Mex). Authors (in alphabetical order): Julio Elias Alvarado-Yaah; Cristóbal Cháidez-Quiróz; Célida Duque Molina; Célida Duque-Molina; Célida Martínez- Rodríguez; Daniel Fregoso-Rueda; Daniel Lira Morales; Eduardo Becerri-Vargas; Fernando Fontove-Herrera; Fidencio Mejía-Nepomuceno; Francisco Pulido; Gloria Elena Espinoza-Ayala; Gloria Elena Espinoza-Ayala; Gloria Maria Molina-Salinas; Gloria Vazquez; Hector Esteban Paz-Juárez; Hector Montoya-Fuentes; Helen Haydee Fernanda Ramirez-Plascencia; Irvin González-López; Jean Pierre González; Joel Armando Vázquez-Pérez.; Jorge Ivan Salinal-Navarez; Jorge Salas-Hernández; José Antonio Enciso-Moreno; José Arturo Martínez-Orozco; José Esteban Muñoz-Medina; José de Jesús Nuñez-Contreras; Juan Bautista Chale-Dzul; Julio Elias Alvarado-Yaah; Julissa Enciso-Ibarra; Luis Alberto Ochoa-Carrera; Margarita Matias-Florentino; Mario Mújica-Sánchez; Maria Guadalupe Santiago-Mauricio; Maria Guadalupe de Jesús Mireles-Rivera; Nelly Sélem-Mojica; Pavel Isa; Ricardo Ciriá Merce; Ricardo Grande; Rosa María Gutiérrez Rios; Santiago Ávila-Rios; Selene Zárate; Susana Lopez; Victor Eduardo Garcia-Arias; Victor Hugo Borja-Aburto |

|                                                                                                                                                                                                                                                                                                                                                                                                                                                                                                                                                                                                                                                                                                                                                                                                                                                                                                                                                                                                                                                                                                                                                                                                                                                                                                                                                                                                                                                                                                                                                                                                                                                                                                                                                                                                                                                                                                                                                                                                                                                                                                                                                                                                                                                                                                                |                                                                                                                                                                                                                                                               |                                                                                                                                                                                                                                                                                                                                                                                                                                                                                                                                                                                                                                                                                                                                                                                                                                                                                                                                                                                                                                                                                                                       |                                                                                                                                                                                                                                                                                                                                                                                                                                                                                                                                                                                                                                                                                                                                                                                                                                                                                                                                                                                                                               |
|----------------------------------------------------------------------------------------------------------------------------------------------------------------------------------------------------------------------------------------------------------------------------------------------------------------------------------------------------------------------------------------------------------------------------------------------------------------------------------------------------------------------------------------------------------------------------------------------------------------------------------------------------------------------------------------------------------------------------------------------------------------------------------------------------------------------------------------------------------------------------------------------------------------------------------------------------------------------------------------------------------------------------------------------------------------------------------------------------------------------------------------------------------------------------------------------------------------------------------------------------------------------------------------------------------------------------------------------------------------------------------------------------------------------------------------------------------------------------------------------------------------------------------------------------------------------------------------------------------------------------------------------------------------------------------------------------------------------------------------------------------------------------------------------------------------------------------------------------------------------------------------------------------------------------------------------------------------------------------------------------------------------------------------------------------------------------------------------------------------------------------------------------------------------------------------------------------------------------------------------------------------------------------------------------------------|---------------------------------------------------------------------------------------------------------------------------------------------------------------------------------------------------------------------------------------------------------------|-----------------------------------------------------------------------------------------------------------------------------------------------------------------------------------------------------------------------------------------------------------------------------------------------------------------------------------------------------------------------------------------------------------------------------------------------------------------------------------------------------------------------------------------------------------------------------------------------------------------------------------------------------------------------------------------------------------------------------------------------------------------------------------------------------------------------------------------------------------------------------------------------------------------------------------------------------------------------------------------------------------------------------------------------------------------------------------------------------------------------|-------------------------------------------------------------------------------------------------------------------------------------------------------------------------------------------------------------------------------------------------------------------------------------------------------------------------------------------------------------------------------------------------------------------------------------------------------------------------------------------------------------------------------------------------------------------------------------------------------------------------------------------------------------------------------------------------------------------------------------------------------------------------------------------------------------------------------------------------------------------------------------------------------------------------------------------------------------------------------------------------------------------------------|
| EPI_ISL_1301473,<br>EPI_ISL_1301552,<br>EPI_ISL_1301714                                                                                                                                                                                                                                                                                                                                                                                                                                                                                                                                                                                                                                                                                                                                                                                                                                                                                                                                                                                                                                                                                                                                                                                                                                                                                                                                                                                                                                                                                                                                                                                                                                                                                                                                                                                                                                                                                                                                                                                                                                                                                                                                                                                                                                                        | Laboratorio Central de Epidemiología IMSS                                                                                                                                                                                                                     | Instituto de Biotecnología de la UNAM                                                                                                                                                                                                                                                                                                                                                                                                                                                                                                                                                                                                                                                                                                                                                                                                                                                                                                                                                                                                                                                                                 | Maria Gutiérrez Ríos; Santiago Ávila-Ríos; Selene Zárate; Susana Lopez; Victor Eduardo Garcia-Arias; Victor Hugo Borja-Aburto                                                                                                                                                                                                                                                                                                                                                                                                                                                                                                                                                                                                                                                                                                                                                                                                                                                                                                 |
| EPI_ISL_2402196,<br>EPI_ISL_2402216                                                                                                                                                                                                                                                                                                                                                                                                                                                                                                                                                                                                                                                                                                                                                                                                                                                                                                                                                                                                                                                                                                                                                                                                                                                                                                                                                                                                                                                                                                                                                                                                                                                                                                                                                                                                                                                                                                                                                                                                                                                                                                                                                                                                                                                                            | Laboratorio Central de Epidemiología (LCE)                                                                                                                                                                                                                    | Unidad de Genómica Avanzada                                                                                                                                                                                                                                                                                                                                                                                                                                                                                                                                                                                                                                                                                                                                                                                                                                                                                                                                                                                                                                                                                           | Alejandra Hernández-Terán; Alejandro Sanchez-Flores; Alma Rincón-Rubio; Andrea Santos Coy-Arechavala; Authors from IBT; Blanca Taboada; Clara Esperanza Santacruz-Tinoco; Edgar Mendieta-Condado; Eduardo Becerril-Vargas; Fidencio Mejía-Nepomuceno; Francisco Pulido; Gisela Barrera-Badillo; Gloria Vazquez; Hector Esteban Paz-Juárez; IMSS; InDRE and INER (in alphabetical order); Carlos F. Arias; Irma Lopez-Martinez; Jerome Jean Verleyen; Joel Armando Vázquez-Pérez; Jorge Salas-Hernández; José Arturo Martínez-Orozco; José Ernesto Ramírez-González; José Esteban Muñoz-Medina; Larissa Fernandes-Matano; Lucia Hernandez-Rivas; Luis Alberto Ochoa-Carrera; Margarita Matías-Florentino; Mario Mújica-Sánchez; Natividad Cruz-Ortiz; Pavel Isa; Ricardo Grande; Santiago Ávila-Ríos; Tatiana Nunez-Garcia; Teresita Rojas-Mendoza                                                                                                                                                                             |
| EPI_ISL_1492643,<br>EPI_ISL_1492645,<br>EPI_ISL_1492646,<br>EPI_ISL_1492653,<br>EPI_ISL_1492674,<br>EPI_ISL_1492675                                                                                                                                                                                                                                                                                                                                                                                                                                                                                                                                                                                                                                                                                                                                                                                                                                                                                                                                                                                                                                                                                                                                                                                                                                                                                                                                                                                                                                                                                                                                                                                                                                                                                                                                                                                                                                                                                                                                                                                                                                                                                                                                                                                            | Laboratorio Central de Salud Publica de Paraguay                                                                                                                                                                                                              | Laboratorio Central de Salud Publica de Paraguay                                                                                                                                                                                                                                                                                                                                                                                                                                                                                                                                                                                                                                                                                                                                                                                                                                                                                                                                                                                                                                                                      | Alejandro Sanchez-Flores; Alfredo Herrera-Estrella; Alicia Ocana-Mondragon; Angel Gustavo Salas-Lais; Bernardo Martinez-Miguel; Blanca Taboada; Brenda Irasema Maldonado-Meza; Carla Ivon Herrera-Najera; Carlos F. Arias; Celia Boukadida; Clara Esperanza Santacruz-Tinoco; Concepcion Grajales-Muniz; Consorcio Mexicano de Vigilancia Genómica (CoVGen-Mex). Authors (in alphabetical order); Julio Elias Alvarado-Yaah; Fernando Fontove-Herrera; Francisco Pulido; Gloria Elena Espinoza-Ayala; Gloria Maria Molina-Salinas; Gloria Vazquez; Hector Esteban Paz-Juarez; Hector Montoya-Fuentes; Helen Haydee Fernanda Ramirez-Plascencia; Jorge Ivan Salinal-Navarez; Jose Antonio Enciso-Moreno; Jose Esteban Munoz-Medina; Jose de Jesus Nunez-Contreras; Juan Bautista Chale-Dzul; Luis Alberto Ochoa-Carrera; Margarita Matias-Florentino; Maria Guadalupe Santiago-Mauricio; Maria Guadalupe de Jesus Mireles-Rivera; Nelly Selem-Mojica; Pavel Isa; Ricardo Grande; Santiago Ávila-Ríos; Victor Hugo Borja-Aburto |
| EPI_ISL_1091264                                                                                                                                                                                                                                                                                                                                                                                                                                                                                                                                                                                                                                                                                                                                                                                                                                                                                                                                                                                                                                                                                                                                                                                                                                                                                                                                                                                                                                                                                                                                                                                                                                                                                                                                                                                                                                                                                                                                                                                                                                                                                                                                                                                                                                                                                                | Laboratorio PGM                                                                                                                                                                                                                                               | Laboratorio de Infectología Molecular, Departamento de Bioquímica y Medicina Molecular, Facultad de Medicina - Universidad Autónoma de Nuevo León                                                                                                                                                                                                                                                                                                                                                                                                                                                                                                                                                                                                                                                                                                                                                                                                                                                                                                                                                                     | Andrea Gómez de la Fuente; Cynthia Vázquez; Flavia Aburjaile; Juan Torales; Luiz Carlos Junior Alcantara; Marta Giovanetti; María José Ortega; María Liz Gamarra; Shirley Villalba; Talita Adelino; Vagner Fonseca                                                                                                                                                                                                                                                                                                                                                                                                                                                                                                                                                                                                                                                                                                                                                                                                            |
| EPI_ISL_457940,<br>EPI_ISL_457962,<br>EPI_ISL_480437                                                                                                                                                                                                                                                                                                                                                                                                                                                                                                                                                                                                                                                                                                                                                                                                                                                                                                                                                                                                                                                                                                                                                                                                                                                                                                                                                                                                                                                                                                                                                                                                                                                                                                                                                                                                                                                                                                                                                                                                                                                                                                                                                                                                                                                           | Laboratorio de Biología Molecular Asociación Española Primera en Salud                                                                                                                                                                                        | Departments of Pathology and Medicine, New York University School of Medicine                                                                                                                                                                                                                                                                                                                                                                                                                                                                                                                                                                                                                                                                                                                                                                                                                                                                                                                                                                                                                                         | Adriana Heguy; Christian Marier; Gael Westby; Gonzalo Manrique; Maria Noel Zubillaga; Maria Victoria Elizondo; Matthew T Maurano; Paul Zappile                                                                                                                                                                                                                                                                                                                                                                                                                                                                                                                                                                                                                                                                                                                                                                                                                                                                                |
| EPI_ISL_2427590,<br>see above                                                                                                                                                                                                                                                                                                                                                                                                                                                                                                                                                                                                                                                                                                                                                                                                                                                                                                                                                                                                                                                                                                                                                                                                                                                                                                                                                                                                                                                                                                                                                                                                                                                                                                                                                                                                                                                                                                                                                                                                                                                                                                                                                                                                                                                                                  | EPI_ISL_2427592, EPI_ISL_2427605, EPI_ISL_2427616, EPI_ISL_2427619, EPI_ISL_2427627, EPI_ISL_2427628, EPI_ISL_2427644, EPI_ISL_2427655, EPI_ISL_2427661, EPI_ISL_2427692, EPI_ISL_2427723, EPI_ISL_2427753, EPI_ISL_2427754, EPI_ISL_2427763, EPI_ISL_2427775 | Departments of Pathology and Medicine, New York University School of Medicine                                                                                                                                                                                                                                                                                                                                                                                                                                                                                                                                                                                                                                                                                                                                                                                                                                                                                                                                                                                                                                         | Adriana Heguy; Cecilia Sorhouet; Christian Marier; Dacia Dimartino; Gonzalo Manrique; Maria Cristina Mogdasy; Maria Noel Zubillaga; Maria Victoria Elizondo; Paul Zappile                                                                                                                                                                                                                                                                                                                                                                                                                                                                                                                                                                                                                                                                                                                                                                                                                                                     |
| EPI_ISL_1324759,<br>EPI_ISL_1324763                                                                                                                                                                                                                                                                                                                                                                                                                                                                                                                                                                                                                                                                                                                                                                                                                                                                                                                                                                                                                                                                                                                                                                                                                                                                                                                                                                                                                                                                                                                                                                                                                                                                                                                                                                                                                                                                                                                                                                                                                                                                                                                                                                                                                                                                            | Laboratorio de Diagnostico de Enfermedades Emergentes y Reemergentes                                                                                                                                                                                          | Instituto de Diagnostico y Referencia Epidemiologicos (INDRE)                                                                                                                                                                                                                                                                                                                                                                                                                                                                                                                                                                                                                                                                                                                                                                                                                                                                                                                                                                                                                                                         | Abriel Rodriguez-Maldonado; Ariadna Medina-Benitez; Claudia Wong-Arambula; Ernesto Ramirez-Gonzalez; Gisela Barrera-Badillo; Irma Lopez-Martinez; Joaquin Quiroz-Mercado; Lucia Hernandez-Rivas; Natali Vega-Magana; Natividad Cruz-Ortiz; Sergio Rangel-Guerrero; Tatiana Nunez-Garcia; Vanessa Rivero-Arredondo                                                                                                                                                                                                                                                                                                                                                                                                                                                                                                                                                                                                                                                                                                             |
| EPI_ISL_1111423                                                                                                                                                                                                                                                                                                                                                                                                                                                                                                                                                                                                                                                                                                                                                                                                                                                                                                                                                                                                                                                                                                                                                                                                                                                                                                                                                                                                                                                                                                                                                                                                                                                                                                                                                                                                                                                                                                                                                                                                                                                                                                                                                                                                                                                                                                | Laboratorio de Referencia Nacional de Enteropatógenos. Instituto Nacional de Salud del Perú                                                                                                                                                                   | Laboratorio de Referencia Nacional de Enteropatógenos. Instituto Nacional de Salud del Perú                                                                                                                                                                                                                                                                                                                                                                                                                                                                                                                                                                                                                                                                                                                                                                                                                                                                                                                                                                                                                           | Fiorella Orellana Peralta; Iris Silva Molina; Junior Caro Castro; Ronnie Gavilan Chavez; Veronica Hurtado Vela; Willi Quino Sifuentes                                                                                                                                                                                                                                                                                                                                                                                                                                                                                                                                                                                                                                                                                                                                                                                                                                                                                         |
| EPI_ISL_516685                                                                                                                                                                                                                                                                                                                                                                                                                                                                                                                                                                                                                                                                                                                                                                                                                                                                                                                                                                                                                                                                                                                                                                                                                                                                                                                                                                                                                                                                                                                                                                                                                                                                                                                                                                                                                                                                                                                                                                                                                                                                                                                                                                                                                                                                                                 | Laboratorio de Referencia Nacional de Virus Respiratorio. Centro Nacional de Salud Publica. Instituto Nacional de Salud Peru.                                                                                                                                 | Laboratorio de Referencia Nacional de Biotecnología y Biología Molecular. Centro Nacional de Salud Publica. Instituto Nacional de Salud Peru.                                                                                                                                                                                                                                                                                                                                                                                                                                                                                                                                                                                                                                                                                                                                                                                                                                                                                                                                                                         | Carlos Padilla Rojas; Henri Bailon Calderon; Johanna Balbuena Torres; Karolyn Vega Chozo; Marco Galarza Perez; Maribel Huaranga Nuñez; Nancy Rojas Serrano.; Omar Caceres Rey; Priscila Lope Pari                                                                                                                                                                                                                                                                                                                                                                                                                                                                                                                                                                                                                                                                                                                                                                                                                             |
| EPI_ISL_491433,<br>EPI_ISL_1092348,<br>EPI_ISL_1137485,<br>EPI_ISL_1137491,<br>EPI_ISL_1532227,<br>EPI_ISL_1532228                                                                                                                                                                                                                                                                                                                                                                                                                                                                                                                                                                                                                                                                                                                                                                                                                                                                                                                                                                                                                                                                                                                                                                                                                                                                                                                                                                                                                                                                                                                                                                                                                                                                                                                                                                                                                                                                                                                                                                                                                                                                                                                                                                                             | Laboratorio de Referencia Nacional de Virus Respiratorio. Instituto Nacional de Salud Perú                                                                                                                                                                    | Laboratorio de Referencia Nacional de Biotecnología y Biología Molecular. Instituto Nacional de Salud Perú                                                                                                                                                                                                                                                                                                                                                                                                                                                                                                                                                                                                                                                                                                                                                                                                                                                                                                                                                                                                            | Carlos Padilla Rojas; Henri Bailon Calderon; Johanna Balbuena Torres; Johanna Balbuena Torrez; Karolyn Vega Chozo; Luis Barcena; Marco Galarza Perez; Maribel Huaranga Nuñez; Nancy Rojas Serrano; Nancy Rojas Serrano.; Omar Caceres Rey; Priscila Lope Pari                                                                                                                                                                                                                                                                                                                                                                                                                                                                                                                                                                                                                                                                                                                                                                 |
| EPI_ISL_1111180, EPI_ISL_1111203, EPI_ISL_1111247, EPI_ISL_1111290, EPI_ISL_1111291, EPI_ISL_1111296, EPI_ISL_1111458<br>see above                                                                                                                                                                                                                                                                                                                                                                                                                                                                                                                                                                                                                                                                                                                                                                                                                                                                                                                                                                                                                                                                                                                                                                                                                                                                                                                                                                                                                                                                                                                                                                                                                                                                                                                                                                                                                                                                                                                                                                                                                                                                                                                                                                             | Laboratorio de Referencia Nacional de Virus Respiratorio. Instituto Nacional de Salud Perú                                                                                                                                                                    | Laboratorio de Referencia Nacional de Enteropatógenos. Instituto Nacional de Salud del Perú                                                                                                                                                                                                                                                                                                                                                                                                                                                                                                                                                                                                                                                                                                                                                                                                                                                                                                                                                                                                                           | Fiorella Orellana Peralta; Iris Silva Molina; Junior Caro Castro; Ronnie Gavilan Chavez; Veronica Hurtado Vela; Willi Quino Sifuentes                                                                                                                                                                                                                                                                                                                                                                                                                                                                                                                                                                                                                                                                                                                                                                                                                                                                                         |
| EPI_ISL_812488,<br>EPI_ISL_1629783,<br>EPI_ISL_1629808                                                                                                                                                                                                                                                                                                                                                                                                                                                                                                                                                                                                                                                                                                                                                                                                                                                                                                                                                                                                                                                                                                                                                                                                                                                                                                                                                                                                                                                                                                                                                                                                                                                                                                                                                                                                                                                                                                                                                                                                                                                                                                                                                                                                                                                         | Laboratorio de Referencia Nacional de Virus Respiratorios, Instituto Nacional de Salud Peru                                                                                                                                                                   | Laboratorio de Genómica Microbiana, Universidad Peruana Cayetano Heredia                                                                                                                                                                                                                                                                                                                                                                                                                                                                                                                                                                                                                                                                                                                                                                                                                                                                                                                                                                                                                                              | Alejandra Dávila-Barclay; Brenda Ayzanoa; Camila Castillo-Vilcahuamán; Diego Cuicapuza; Guillermo Salvatierra; Janet Huancachoque; Lenin Maturrano; Luis González; Maribel Huaranga; Nancy Rojas; Oscar Escalante; Pablo Tsukayama; Pedro E. Romero; Pool Marcos; Priscila Lope; Priscilla Lope                                                                                                                                                                                                                                                                                                                                                                                                                                                                                                                                                                                                                                                                                                                               |
| EPI_ISL_2536702, EPI_ISL_2536705, EPI_ISL_2536728, EPI_ISL_2536745, EPI_ISL_2536764, EPI_ISL_2536772, EPI_ISL_2536776, EPI_ISL_2536779, EPI_ISL_2536787, EPI_ISL_2536788, EPI_ISL_2536790, EPI_ISL_2536791, EPI_ISL_2536793, EPI_ISL_2536810, EPI_ISL_2536822, EPI_ISL_2536823, EPI_ISL_2536824, EPI_ISL_2536848, EPI_ISL_2536863, EPI_ISL_2536876, EPI_ISL_2562267, EPI_ISL_2562268<br>see above                                                                                                                                                                                                                                                                                                                                                                                                                                                                                                                                                                                                                                                                                                                                                                                                                                                                                                                                                                                                                                                                                                                                                                                                                                                                                                                                                                                                                                                                                                                                                                                                                                                                                                                                                                                                                                                                                                              | Laboratorio de Referencial Nacional de Virus Respiratorios                                                                                                                                                                                                    | Laboratorio de Referencial Nacional de Virus Respiratorios                                                                                                                                                                                                                                                                                                                                                                                                                                                                                                                                                                                                                                                                                                                                                                                                                                                                                                                                                                                                                                                            | Carlos Padilla Rojas; Henri Bailon Calderon; Iris Silva Molina; Joseph Huayra Niquen; Lely Solari Zepa; Luis Barcena Flores; Marco Galarza Perez; Nancy Rojas Serrano; Omar Caceres Rey; Orson Mestanza Millones; Priscila Lope Pari; Sandra Morales Ruiz; Steve Acedo Lazo; Veronica Hurtado Vela                                                                                                                                                                                                                                                                                                                                                                                                                                                                                                                                                                                                                                                                                                                            |
| EPI_ISL_2544206<br>EPI_ISL_1746033                                                                                                                                                                                                                                                                                                                                                                                                                                                                                                                                                                                                                                                                                                                                                                                                                                                                                                                                                                                                                                                                                                                                                                                                                                                                                                                                                                                                                                                                                                                                                                                                                                                                                                                                                                                                                                                                                                                                                                                                                                                                                                                                                                                                                                                                             | Laboratorio di Microbiologia<br>Laboratorium Analiz Lekarskich Alab Rzeszów                                                                                                                                                                                   | Laboratorio di Microbiologia<br>1. National Institute of Public Health - National Institute of Hygiene; 2. Eurofins Genomics Europe Sequencing GmbH                                                                                                                                                                                                                                                                                                                                                                                                                                                                                                                                                                                                                                                                                                                                                                                                                                                                                                                                                                   | Martinetti Lucchini Gladys; Valeria Spina<br>ECDC COVID-19 WGS support team; Eurofins Genomics Europe Sequencing Team; Gierczyński Rafał; Sadkowska-Todys Małgorzata; Wolkowicz Tomasz; Zacharczuk Katarzyna                                                                                                                                                                                                                                                                                                                                                                                                                                                                                                                                                                                                                                                                                                                                                                                                                  |
| EPI_ISL_1221236, EPI_ISL_1221498, EPI_ISL_1221598, EPI_ISL_1221862, EPI_ISL_1222319, EPI_ISL_1222343, EPI_ISL_1298343, EPI_ISL_1320824, EPI_ISL_1338963, EPI_ISL_1514376, EPI_ISL_1515032, EPI_ISL_1515630, EPI_ISL_1515661, EPI_ISL_1515706, EPI_ISL_1548630, EPI_ISL_1610960, EPI_ISL_1611370, EPI_ISL_1612169, EPI_ISL_1612208, EPI_ISL_1681305, EPI_ISL_1681478, EPI_ISL_1681577, EPI_ISL_1681600, EPI_ISL_1682964, EPI_ISL_1683153, EPI_ISL_1683867, EPI_ISL_1683986, EPI_ISL_1684717, EPI_ISL_1685045, EPI_ISL_1799003, EPI_ISL_1799336, EPI_ISL_1799474, EPI_ISL_1800829, EPI_ISL_1800981, EPI_ISL_1800987, EPI_ISL_1801017, EPI_ISL_1801330, EPI_ISL_1801360, EPI_ISL_1801624, EPI_ISL_1801691, EPI_ISL_1801976, EPI_ISL_1802058, EPI_ISL_1802476, EPI_ISL_1925625, EPI_ISL_1925681, EPI_ISL_1925936, EPI_ISL_1926073, EPI_ISL_1926250, EPI_ISL_1926283, EPI_ISL_1926372, EPI_ISL_1926482, EPI_ISL_1926580, EPI_ISL_1926717, EPI_ISL_1926968, EPI_ISL_1927603, EPI_ISL_1927971, EPI_ISL_1928600, EPI_ISL_1928896, EPI_ISL_1929055, EPI_ISL_1929232, EPI_ISL_1929301, EPI_ISL_1929356, EPI_ISL_1929448, EPI_ISL_1930528, EPI_ISL_1930706, EPI_ISL_1930789, EPI_ISL_1930858, EPI_ISL_1931019, EPI_ISL_1931052, EPI_ISL_1931275, EPI_ISL_1931296, EPI_ISL_1931734, EPI_ISL_1932000, EPI_ISL_1932009, EPI_ISL_2044007, EPI_ISL_2044013, EPI_ISL_2044036, EPI_ISL_2044077, EPI_ISL_2044210, EPI_ISL_2044211, EPI_ISL_2044343, EPI_ISL_2044454, EPI_ISL_2044524, EPI_ISL_2044588, EPI_ISL_2044622, EPI_ISL_2044694, EPI_ISL_2044695, EPI_ISL_2044706, EPI_ISL_2044786, EPI_ISL_2044941, EPI_ISL_2044942, EPI_ISL_2045014, EPI_ISL_2045112, EPI_ISL_2045385, EPI_ISL_2045440, EPI_ISL_2045668, EPI_ISL_2045783, EPI_ISL_2045847, EPI_ISL_2045856, EPI_ISL_2045974, EPI_ISL_2046278, EPI_ISL_2046357, EPI_ISL_2046388, EPI_ISL_2046570, EPI_ISL_2181883, EPI_ISL_2182032, EPI_ISL_2183055, EPI_ISL_2183147, EPI_ISL_2183734, EPI_ISL_2184155, EPI_ISL_2185103, EPI_ISL_2185253, EPI_ISL_2185260, EPI_ISL_2307071, EPI_ISL_2397967, EPI_ISL_2398058, EPI_ISL_2480895, EPI_ISL_2481235, EPI_ISL_2481952, EPI_ISL_2482161, EPI_ISL_2611161, EPI_ISL_2611207, EPI_ISL_2611321, EPI_ISL_2611400, EPI_ISL_2611407, EPI_ISL_2611486, EPI_ISL_2611493, EPI_ISL_2611575, EPI_ISL_2611589, EPI_ISL_2611628,<br>see above | Centers for Disease Control and Prevention Division of Viral Diseases, Pathogen Discovery                                                                                                                                                                     | Adrian Paskey; Amanda Douglas; Amanda Suchanek; Andrea Throop; Ayla Burns; Ben L. Rambo-Martin; Benjamin Rambo-Martin; Bobbi Croy; Brian Krueger; Brian Norvell; Christopher Gulvick; Christos Petropoulos; Clinton R. Paden; Craig Lukasik; Dakota Howard; Darlene Wagner; Debbie Boles; Dhvani Batra; Duncan MacCannell; Eyad Almasri; Goran Stevonic; Howard Engler; Hrushikesh Deshmukh; Jake Humphrey; Jana Schroth; Jason Caravas; Joe Voshell; John Pruitt; Jonathan Meltzer; Jonathan Williams; Kara Moser; Kimberly Wagner; Lax Iyer; Lisa Pfefferle; Lyndon Tilson; Manoj Jain; Marcia Eisenberg; Mary Ann Cristobal; Mary Williamson; Matthew Robinson; Matthew Schmerer; Michael Levandoski; Mike Sapeta; Mindy Nye; Minoo Agarwal; Mohan Kolli; Nuthawin Charoensri; Oren Cohen; Peter W. Cook; Prashant Gupta; Qian Zeng; Rama Ghatti; Scott Parker; Scott Ryan; Scott Sammons; Shatavia Morrison; Stanley Letovsky; Steven Ragan; Suresh Babu Selvaraju; Susan Countryman; Susan Hicks; Suxiang Tong; Suzanne Dale; Thomas Urban; Tim Kuphal; Tricia Zwiefelhofer; Vincent Drouillon; Yvette Unoaurnhi |                                                                                                                                                                                                                                                                                                                                                                                                                                                                                                                                                                                                                                                                                                                                                                                                                                                                                                                                                                                                                               |
| EPI_ISL_1029731,<br>EPI_ISL_1030673,<br>EPI_ISL_1031874<br>EPI_ISL_754905                                                                                                                                                                                                                                                                                                                                                                                                                                                                                                                                                                                                                                                                                                                                                                                                                                                                                                                                                                                                                                                                                                                                                                                                                                                                                                                                                                                                                                                                                                                                                                                                                                                                                                                                                                                                                                                                                                                                                                                                                                                                                                                                                                                                                                      | Laboratory Corporation of America<br>Laboratory Diagnostics and Clinical Immunology of Developmental Age, Medical University of Warsaw                                                                                                                        | Respiratory Viruses Branch, Division of Viral Diseases, Centers for Disease Control and Prevention<br>genXone SA, Research & Development Laboratory; The Faculty of Mathematics, Informatics and Mechanics of the University of Warsaw                                                                                                                                                                                                                                                                                                                                                                                                                                                                                                                                                                                                                                                                                                                                                                                                                                                                                | Ben L. Rambo-Martin; Clinton R. Paden; Dakota Howard; Dhvani Batra; Duncan MacCannell; Peter W. Cook; Suxiang Tong<br>Anna Gambin; Grzegorz Nowicki; Jakub Grabowski; Maciej Sykulski; Michał Kaszuba; Monika Mańkowska-Woźniak; Natalia Drwęska-Matelska; Urszula Demkow; Łukasz Krych                                                                                                                                                                                                                                                                                                                                                                                                                                                                                                                                                                                                                                                                                                                                       |
| EPI_ISL_415743,<br>EPI_ISL_660543,<br>EPI_ISL_660545,<br>EPI_ISL_2249597,<br>EPI_ISL_2250151,<br>EPI_ISL_2250184                                                                                                                                                                                                                                                                                                                                                                                                                                                                                                                                                                                                                                                                                                                                                                                                                                                                                                                                                                                                                                                                                                                                                                                                                                                                                                                                                                                                                                                                                                                                                                                                                                                                                                                                                                                                                                                                                                                                                                                                                                                                                                                                                                                               | Laboratory Medicine                                                                                                                                                                                                                                           | Department of Laboratory Medicine, Lin-Kou Chang Gung Memorial Hospital, Taoyuan, Taiwan                                                                                                                                                                                                                                                                                                                                                                                                                                                                                                                                                                                                                                                                                                                                                                                                                                                                                                                                                                                                                              | Cheng-Hsun Chiu; Cheng-Ta Yang; Chi-Hsien Huang; Chung-Guei Huang; Guang-Wu Chen; Kuang-Tso Le; Kuo-Chien Tsao; Kuo-Ming Lee; Mei-Jen Hsiao; Peng-Nien Huang; Po-Wei Huang; Shin-Ru Shih; Shu-Li Yang; Shu-Min Lin; Yi-Chun Liu; Yu-Nong Gong                                                                                                                                                                                                                                                                                                                                                                                                                                                                                                                                                                                                                                                                                                                                                                                 |
| EPI_ISL_1381307,<br>EPI_ISL_1381327,<br>EPI_ISL_1381360,<br>EPI_ISL_1381361,<br>EPI_ISL_1591117                                                                                                                                                                                                                                                                                                                                                                                                                                                                                                                                                                                                                                                                                                                                                                                                                                                                                                                                                                                                                                                                                                                                                                                                                                                                                                                                                                                                                                                                                                                                                                                                                                                                                                                                                                                                                                                                                                                                                                                                                                                                                                                                                                                                                | Laboratory for Respiratory Viruses, Cantacuzino National Military-Medical Institute for Research and Development                                                                                                                                              | Cantacuzino Institute Virology                                                                                                                                                                                                                                                                                                                                                                                                                                                                                                                                                                                                                                                                                                                                                                                                                                                                                                                                                                                                                                                                                        | Catalina Pascu; Cherciu Carmen; Luiza Ustea; Mihaela Lazar; Mihaela Oprea; Nicoleta Paraschiv; Sorin Dinu                                                                                                                                                                                                                                                                                                                                                                                                                                                                                                                                                                                                                                                                                                                                                                                                                                                                                                                     |
| EPI_ISL_2153433,<br>EPI_ISL_2154331                                                                                                                                                                                                                                                                                                                                                                                                                                                                                                                                                                                                                                                                                                                                                                                                                                                                                                                                                                                                                                                                                                                                                                                                                                                                                                                                                                                                                                                                                                                                                                                                                                                                                                                                                                                                                                                                                                                                                                                                                                                                                                                                                                                                                                                                            | Laboratory of Microbiology, National Reference Lab, Charles Nicolle Hospital; 2-University of Tunis ElManar, Faculty of Medicine of Tunis, LR99ES09, Tunis, Tunisia                                                                                           | Clinical and Experimental Pharmacology Lab, LR16SP02, National Center of Pharmacovigilance, University of Tunis El Manar, Tunis, Tunisia. 2-Neurodegenerative diseases and psychiatric troubles, LR18SP03, Razi Hospital, University of Tunis El Manar, Tunis, Tunisia. 3- Ministry of Health, National Observatory of New and Emerging Diseases, 1006, Tunis, Tunisia                                                                                                                                                                                                                                                                                                                                                                                                                                                                                                                                                                                                                                                                                                                                                | Alia BenKahla; Ilhem Boutiba-Ben Boubaker.; Imen Kacem; Imen Mdini; Jalila Ben Khelil; Maher Kharra; Manel Ben Sassi; Mouna Ben Sassi; Mouna Safer; Nissaf Ben Alaya; Raja Mahfoudh; Riadh Daghfous; Riadh Gouider; Roua Ben Othman; Salma Abid; Sameh Trabelsi; Sana Ferjani; Sarra Chamman; Taha Maatoug                                                                                                                                                                                                                                                                                                                                                                                                                                                                                                                                                                                                                                                                                                                    |
| EPI_ISL_1198644                                                                                                                                                                                                                                                                                                                                                                                                                                                                                                                                                                                                                                                                                                                                                                                                                                                                                                                                                                                                                                                                                                                                                                                                                                                                                                                                                                                                                                                                                                                                                                                                                                                                                                                                                                                                                                                                                                                                                                                                                                                                                                                                                                                                                                                                                                | Laboratory of Virology and Molecular Diagnostics                                                                                                                                                                                                              | Laboratory of Virology and Molecular Diagnostics, Institute of Public Health of Republic of North Macedonia                                                                                                                                                                                                                                                                                                                                                                                                                                                                                                                                                                                                                                                                                                                                                                                                                                                                                                                                                                                                           | Boshevska Golubinka; Janchevska Elizabeta; Kuzmanovska Maja                                                                                                                                                                                                                                                                                                                                                                                                                                                                                                                                                                                                                                                                                                                                                                                                                                                                                                                                                                   |
| EPI_ISL_1191740,<br>EPI_ISL_1191780                                                                                                                                                                                                                                                                                                                                                                                                                                                                                                                                                                                                                                                                                                                                                                                                                                                                                                                                                                                                                                                                                                                                                                                                                                                                                                                                                                                                                                                                                                                                                                                                                                                                                                                                                                                                                                                                                                                                                                                                                                                                                                                                                                                                                                                                            | Laboratory of virology and molecular diagnostics                                                                                                                                                                                                              | Laboratory of virology and molecular diagnostics                                                                                                                                                                                                                                                                                                                                                                                                                                                                                                                                                                                                                                                                                                                                                                                                                                                                                                                                                                                                                                                                      | Boshevska Golubinka; Janchevska Elizabeta; Kuzmanovska Maja                                                                                                                                                                                                                                                                                                                                                                                                                                                                                                                                                                                                                                                                                                                                                                                                                                                                                                                                                                   |
| EPI_ISL_1669975,<br>EPI_ISL_1669995,<br>EPI_ISL_2392162                                                                                                                                                                                                                                                                                                                                                                                                                                                                                                                                                                                                                                                                                                                                                                                                                                                                                                                                                                                                                                                                                                                                                                                                                                                                                                                                                                                                                                                                                                                                                                                                                                                                                                                                                                                                                                                                                                                                                                                                                                                                                                                                                                                                                                                        | Laboratory of virology and molecular diagnostics, Institute of Public Health                                                                                                                                                                                  | Laboratory of virology and molecular diagnostics, Institute of Public Health                                                                                                                                                                                                                                                                                                                                                                                                                                                                                                                                                                                                                                                                                                                                                                                                                                                                                                                                                                                                                                          | Boshevska G; Janchevska E.; Kuzmanovska M                                                                                                                                                                                                                                                                                                                                                                                                                                                                                                                                                                                                                                                                                                                                                                                                                                                                                                                                                                                     |
| EPI_ISL_2274445<br>EPI_ISL_1499599                                                                                                                                                                                                                                                                                                                                                                                                                                                                                                                                                                                                                                                                                                                                                                                                                                                                                                                                                                                                                                                                                                                                                                                                                                                                                                                                                                                                                                                                                                                                                                                                                                                                                                                                                                                                                                                                                                                                                                                                                                                                                                                                                                                                                                                                             | Labormedizinisches Zentrum Dr Risch<br>Lafene Health Center                                                                                                                                                                                                   | Clinical Bacteriology<br>Kansas State Veterinary Diagnostic Laboratory                                                                                                                                                                                                                                                                                                                                                                                                                                                                                                                                                                                                                                                                                                                                                                                                                                                                                                                                                                                                                                                | Adrian Egli; Alfredo Mari; Hans Hirsch; Helena MB Seth-Smith; Julia Bielicki; Karoline Leuzinger; Lorenz Risch; Madlen Stange; Manuel Battegay; Martin Risch; Nadia Wohlwend; Tim Roloff<br>Andreae Lu; Elizabeth Porter; Emily Cox; Jamie Henningson; Jianfa Bai; Kasey Hogan; Lance Noll; Rachel Palinski; Tyler Doerkson                                                                                                                                                                                                                                                                                                                                                                                                                                                                                                                                                                                                                                                                                                   |
| EPI_ISL_447900<br>EPI_ISL_1534272                                                                                                                                                                                                                                                                                                                                                                                                                                                                                                                                                                                                                                                                                                                                                                                                                                                                                                                                                                                                                                                                                                                                                                                                                                                                                                                                                                                                                                                                                                                                                                                                                                                                                                                                                                                                                                                                                                                                                                                                                                                                                                                                                                                                                                                                              | Lednický Laboratory at Emerging Pathogens Institute<br>Lentegeur Hospital wv LGH                                                                                                                                                                              | University of Florida<br>NHLs/UCT                                                                                                                                                                                                                                                                                                                                                                                                                                                                                                                                                                                                                                                                                                                                                                                                                                                                                                                                                                                                                                                                                     | Alam; C.J.; Elbadry; Gibson; J.A.; J.C.; J.G.; Lednicky; M.A. and Morris; M.M.; Stephenson<br>Arash Iranzadeh; Bruna Galvao; Carolyn Williamson; Deelan Doolabh; Diana Hardie; Innocent Mudau; Kruger Marais; Lynn Tyers; Marvin Hsiao; Stephen Korsman                                                                                                                                                                                                                                                                                                                                                                                                                                                                                                                                                                                                                                                                                                                                                                       |

|                                                                                                                                                                                                                                                                                                                                                                                                                                                                                                                                                                                                                                                                                                                                                                                                                                                                                                                                                                                                                                                                                                                                                                                                                                                                                                                                                                                                                                                                                                                                                                                                                                                                                                                                                                                                                                                                                                                                                                                                                                                                                                                                                                                                                                                                                                                                                                                                                                                                                                                                                                                                                                                                                                                                                                                                                                                                                                                                                                                                                                                                                                                                                                                                                                                                                                                                                                                                                                                                                                                                                                                                                                                                                                                                                                                                                                                                                                                                                                                                                                                                                                                                                                                                                                                                                                                                                                                                                                                                                                                                                                                                                                                                                                                                                                                                                                                                                                                                                                                                                                                                                                                                  |                                                                                                             |                                                                                                                        |                                                                                                                                                                                                                                                                                                                                                                                                                                                                                                                                                                                                                                                                                                                                                           |
|----------------------------------------------------------------------------------------------------------------------------------------------------------------------------------------------------------------------------------------------------------------------------------------------------------------------------------------------------------------------------------------------------------------------------------------------------------------------------------------------------------------------------------------------------------------------------------------------------------------------------------------------------------------------------------------------------------------------------------------------------------------------------------------------------------------------------------------------------------------------------------------------------------------------------------------------------------------------------------------------------------------------------------------------------------------------------------------------------------------------------------------------------------------------------------------------------------------------------------------------------------------------------------------------------------------------------------------------------------------------------------------------------------------------------------------------------------------------------------------------------------------------------------------------------------------------------------------------------------------------------------------------------------------------------------------------------------------------------------------------------------------------------------------------------------------------------------------------------------------------------------------------------------------------------------------------------------------------------------------------------------------------------------------------------------------------------------------------------------------------------------------------------------------------------------------------------------------------------------------------------------------------------------------------------------------------------------------------------------------------------------------------------------------------------------------------------------------------------------------------------------------------------------------------------------------------------------------------------------------------------------------------------------------------------------------------------------------------------------------------------------------------------------------------------------------------------------------------------------------------------------------------------------------------------------------------------------------------------------------------------------------------------------------------------------------------------------------------------------------------------------------------------------------------------------------------------------------------------------------------------------------------------------------------------------------------------------------------------------------------------------------------------------------------------------------------------------------------------------------------------------------------------------------------------------------------------------------------------------------------------------------------------------------------------------------------------------------------------------------------------------------------------------------------------------------------------------------------------------------------------------------------------------------------------------------------------------------------------------------------------------------------------------------------------------------------------------------------------------------------------------------------------------------------------------------------------------------------------------------------------------------------------------------------------------------------------------------------------------------------------------------------------------------------------------------------------------------------------------------------------------------------------------------------------------------------------------------------------------------------------------------------------------------------------------------------------------------------------------------------------------------------------------------------------------------------------------------------------------------------------------------------------------------------------------------------------------------------------------------------------------------------------------------------------------------------------------------------------------------------------------|-------------------------------------------------------------------------------------------------------------|------------------------------------------------------------------------------------------------------------------------|-----------------------------------------------------------------------------------------------------------------------------------------------------------------------------------------------------------------------------------------------------------------------------------------------------------------------------------------------------------------------------------------------------------------------------------------------------------------------------------------------------------------------------------------------------------------------------------------------------------------------------------------------------------------------------------------------------------------------------------------------------------|
| EPI_ISL_1224472, EPI_ISL_1912729                                                                                                                                                                                                                                                                                                                                                                                                                                                                                                                                                                                                                                                                                                                                                                                                                                                                                                                                                                                                                                                                                                                                                                                                                                                                                                                                                                                                                                                                                                                                                                                                                                                                                                                                                                                                                                                                                                                                                                                                                                                                                                                                                                                                                                                                                                                                                                                                                                                                                                                                                                                                                                                                                                                                                                                                                                                                                                                                                                                                                                                                                                                                                                                                                                                                                                                                                                                                                                                                                                                                                                                                                                                                                                                                                                                                                                                                                                                                                                                                                                                                                                                                                                                                                                                                                                                                                                                                                                                                                                                                                                                                                                                                                                                                                                                                                                                                                                                                                                                                                                                                                                 | Lighthouse Lab in Alderley Park                                                                             | Wellcome Sanger Institute for the COVID-19 Genomics UK (COG-UK) Consortium                                             | Cordelia Langford; David K. Jackson; Dominic Kwiatkowski; Ewan Harrison; Ian Johnston; Jacquelyn Wynn; Jeffrey Barrett; John Sillitoe on behalf of the Wellcome Sanger Institute COVID-19 Surveillance Team; Mairead Hyland; Roberto Amato; Sonia Goncalves; The Lighthouse Lab in Alderley Park and Alex Alderton                                                                                                                                                                                                                                                                                                                                                                                                                                        |
| EPI_ISL_1635379, EPI_ISL_1635400, EPI_ISL_1653755, EPI_ISL_1673100                                                                                                                                                                                                                                                                                                                                                                                                                                                                                                                                                                                                                                                                                                                                                                                                                                                                                                                                                                                                                                                                                                                                                                                                                                                                                                                                                                                                                                                                                                                                                                                                                                                                                                                                                                                                                                                                                                                                                                                                                                                                                                                                                                                                                                                                                                                                                                                                                                                                                                                                                                                                                                                                                                                                                                                                                                                                                                                                                                                                                                                                                                                                                                                                                                                                                                                                                                                                                                                                                                                                                                                                                                                                                                                                                                                                                                                                                                                                                                                                                                                                                                                                                                                                                                                                                                                                                                                                                                                                                                                                                                                                                                                                                                                                                                                                                                                                                                                                                                                                                                                               | Lighthouse Lab in Cambridge                                                                                 | Wellcome Sanger Institute for the COVID-19 Genomics UK (COG-UK) Consortium                                             | Cordelia Langford; David K. Jackson; Dominic Kwiatkowski; Ewan Harrison; Ian Johnston; Jeffrey Barrett; John Sillitoe on behalf of the Wellcome Sanger Institute COVID-19 Surveillance Team; Rob Howes; Roberto Amato; Sonia Goncalves; The Lighthouse Lab in Cambridge and Alex Alderton                                                                                                                                                                                                                                                                                                                                                                                                                                                                 |
| EPI_ISL_1208020, EPI_ISL_1635330, EPI_ISL_1741623, EPI_ISL_1741651, EPI_ISL_1741677, EPI_ISL_1741762, EPI_ISL_1741838, EPI_ISL_1741909, EPI_ISL_1758819, EPI_ISL_1758829, EPI_ISL_1806892, EPI_ISL_1829541, EPI_ISL_1829569, EPI_ISL_1830056, EPI_ISL_1830493, EPI_ISL_1830765, EPI_ISL_1830794, EPI_ISL_1830879, EPI_ISL_1830886, EPI_ISL_1831174, EPI_ISL_1912648, EPI_ISL_1912669, EPI_ISL_1912682, EPI_ISL_1912695, EPI_ISL_1912732, EPI_ISL_1939630, EPI_ISL_1939651, EPI_ISL_1939726, EPI_ISL_1939750, EPI_ISL_1939772, EPI_ISL_1939791, EPI_ISL_1939812, EPI_ISL_1986954, EPI_ISL_1986989, EPI_ISL_1987194, EPI_ISL_1987292, EPI_ISL_2022555, EPI_ISL_2022593, EPI_ISL_2022634, EPI_ISL_2022661, EPI_ISL_2022726, EPI_ISL_2022753, EPI_ISL_2022978, EPI_ISL_2092754, EPI_ISL_2122710, EPI_ISL_2122724, EPI_ISL_2122774, EPI_ISL_2122807, EPI_ISL_2122807, EPI_ISL_2122809, EPI_ISL_2122813, EPI_ISL_2122856, EPI_ISL_2122872, EPI_ISL_2122903, EPI_ISL_2122913, EPI_ISL_2122931, EPI_ISL_2122961, EPI_ISL_2122981, EPI_ISL_2123003, EPI_ISL_2123013, EPI_ISL_2123014, EPI_ISL_2123015, EPI_ISL_2123016, EPI_ISL_2123017, EPI_ISL_2123018, EPI_ISL_2123019, EPI_ISL_2123020, EPI_ISL_2123021, EPI_ISL_2123022, EPI_ISL_2123023, EPI_ISL_2123024, EPI_ISL_2123025, EPI_ISL_2123026, EPI_ISL_2123027, EPI_ISL_2123028, EPI_ISL_2123029, EPI_ISL_2123030, EPI_ISL_2123031, EPI_ISL_2123032, EPI_ISL_2123033, EPI_ISL_2123034, EPI_ISL_2123035, EPI_ISL_2123036, EPI_ISL_2123037, EPI_ISL_2123038, EPI_ISL_2123039, EPI_ISL_2123040, EPI_ISL_2123041, EPI_ISL_2123042, EPI_ISL_2123043, EPI_ISL_2123044, EPI_ISL_2123045, EPI_ISL_2123046, EPI_ISL_2123047, EPI_ISL_2123048, EPI_ISL_2123049, EPI_ISL_2123050, EPI_ISL_2123051, EPI_ISL_2123052, EPI_ISL_2123053, EPI_ISL_2123054, EPI_ISL_2123055, EPI_ISL_2123056, EPI_ISL_2123057, EPI_ISL_2123058, EPI_ISL_2123059, EPI_ISL_2123060, EPI_ISL_2123061, EPI_ISL_2123062, EPI_ISL_2123063, EPI_ISL_2123064, EPI_ISL_2123065, EPI_ISL_2123066, EPI_ISL_2123067, EPI_ISL_2123068, EPI_ISL_2123069, EPI_ISL_2123070, EPI_ISL_2123071, EPI_ISL_2123072, EPI_ISL_2123073, EPI_ISL_2123074, EPI_ISL_2123075, EPI_ISL_2123076, EPI_ISL_2123077, EPI_ISL_2123078, EPI_ISL_2123079, EPI_ISL_2123080, EPI_ISL_2123081, EPI_ISL_2123082, EPI_ISL_2123083, EPI_ISL_2123084, EPI_ISL_2123085, EPI_ISL_2123086, EPI_ISL_2123087, EPI_ISL_2123088, EPI_ISL_2123089, EPI_ISL_2123090, EPI_ISL_2123091, EPI_ISL_2123092, EPI_ISL_2123093, EPI_ISL_2123094, EPI_ISL_2123095, EPI_ISL_2123096, EPI_ISL_2123097, EPI_ISL_2123098, EPI_ISL_2123099, EPI_ISL_2123100, EPI_ISL_2123101, EPI_ISL_2123102, EPI_ISL_2123103, EPI_ISL_2123104, EPI_ISL_2123105, EPI_ISL_2123106, EPI_ISL_2123107, EPI_ISL_2123108, EPI_ISL_2123109, EPI_ISL_2123110, EPI_ISL_2123111, EPI_ISL_2123112, EPI_ISL_2123113, EPI_ISL_2123114, EPI_ISL_2123115, EPI_ISL_2123116, EPI_ISL_2123117, EPI_ISL_2123118, EPI_ISL_2123119, EPI_ISL_2123120, EPI_ISL_2123121, EPI_ISL_2123122, EPI_ISL_2123123, EPI_ISL_2123124, EPI_ISL_2123125, EPI_ISL_2123126, EPI_ISL_2123127, EPI_ISL_2123128, EPI_ISL_2123129, EPI_ISL_2123130, EPI_ISL_2123131, EPI_ISL_2123132, EPI_ISL_2123133, EPI_ISL_2123134, EPI_ISL_2123135, EPI_ISL_2123136, EPI_ISL_2123137, EPI_ISL_2123138, EPI_ISL_2123139, EPI_ISL_2123140, EPI_ISL_2123141, EPI_ISL_2123142, EPI_ISL_2123143, EPI_ISL_2123144, EPI_ISL_2123145, EPI_ISL_2123146, EPI_ISL_2123147, EPI_ISL_2123148, EPI_ISL_2123149, EPI_ISL_2123150, EPI_ISL_2123151, EPI_ISL_2123152, EPI_ISL_2123153, EPI_ISL_2123154, EPI_ISL_2123155, EPI_ISL_2123156, EPI_ISL_2123157, EPI_ISL_2123158, EPI_ISL_2123159, EPI_ISL_2123160, EPI_ISL_2123161, EPI_ISL_2123162, EPI_ISL_2123163, EPI_ISL_2123164, EPI_ISL_2123165, EPI_ISL_2123166, EPI_ISL_2123167, EPI_ISL_2123168, EPI_ISL_2123169, EPI_ISL_2123170, EPI_ISL_2123171, EPI_ISL_2123172, EPI_ISL_2123173, EPI_ISL_2123174, EPI_ISL_2123175, EPI_ISL_2123176, EPI_ISL_2123177, EPI_ISL_2123178, EPI_ISL_2123179, EPI_ISL_2123180, EPI_ISL_2123181, EPI_ISL_2123182, EPI_ISL_2123183, EPI_ISL_2123184, EPI_ISL_2123185, EPI_ISL_2123186, EPI_ISL_2123187, EPI_ISL_2123188, EPI_ISL_2123189, EPI_ISL_2123190, EPI_ISL_2123191, EPI_ISL_2123192, EPI_ISL_2123193, EPI_ISL_2123194, EPI_ISL_2123195, EPI_ISL_2123196, EPI_ISL_2123197, EPI_ISL_2123198, EPI_ISL_2123199, EPI_ISL_2123200, EPI_ISL_2123201, EPI_ISL_2123202, EPI_ISL_2123203, EPI_ISL_2123204, EPI_ISL_2123205, EPI_ISL_2123206, EPI_ISL_2123207, EPI_ISL_2123208, EPI_ISL_2123209, EPI_ISL_2123210, EPI_ISL_2123211, EPI_ISL_2123212, EPI_ISL_2123213, EPI_ISL_2123214, EPI_ISL_2123215, EPI_ISL_2123216, EPI_ISL_2123217, EPI_ISL_2123218, EPI_ISL_2123219, EPI_ISL_2123220, EPI_ISL_2123221, EPI_ISL_2123222, EPI_ISL_2123223, EPI_ISL_2123224, EPI_ISL_2123225, EPI_ISL_2123226, EPI_ISL_2123227, EPI_ISL_2123228, EPI_ISL_2123229, EPI_ISL_2123230, EPI_ISL_2123231, EPI_ISL_2123232, EPI_ISL_2123233, EPI_ISL_2123234, EPI_ISL_2123235, EPI_ISL_2123236, EPI_ISL_2123237, EPI_ISL_2123238, EPI_ISL_2123239, EPI_ISL_2123240, EPI_ISL_2123241, EPI_ISL_2123242, EPI_ISL_2123243 |                                                                                                             |                                                                                                                        |                                                                                                                                                                                                                                                                                                                                                                                                                                                                                                                                                                                                                                                                                                                                                           |
| see above                                                                                                                                                                                                                                                                                                                                                                                                                                                                                                                                                                                                                                                                                                                                                                                                                                                                                                                                                                                                                                                                                                                                                                                                                                                                                                                                                                                                                                                                                                                                                                                                                                                                                                                                                                                                                                                                                                                                                                                                                                                                                                                                                                                                                                                                                                                                                                                                                                                                                                                                                                                                                                                                                                                                                                                                                                                                                                                                                                                                                                                                                                                                                                                                                                                                                                                                                                                                                                                                                                                                                                                                                                                                                                                                                                                                                                                                                                                                                                                                                                                                                                                                                                                                                                                                                                                                                                                                                                                                                                                                                                                                                                                                                                                                                                                                                                                                                                                                                                                                                                                                                                                        | Lighthouse Lab in Glasgow                                                                                   | Wellcome Sanger Institute for the COVID-19 Genomics UK (COG-UK) Consortium                                             | Anna Dominiczak and Alex Alderton; Carol Clugston; Cordelia Langford; David Gray; David K. Jackson; Dominic Kwiatkowski; Ewan Harrison; Harper VanSteenhouse; Ian Johnston; Jeffrey Barrett; John Sillitoe on behalf of the Wellcome Sanger Institute COVID-19 Surveillance Team; Roberto Amato; Sonia Goncalves; Yumi Kasai                                                                                                                                                                                                                                                                                                                                                                                                                              |
| EPI_ISL_533151, EPI_ISL_600469                                                                                                                                                                                                                                                                                                                                                                                                                                                                                                                                                                                                                                                                                                                                                                                                                                                                                                                                                                                                                                                                                                                                                                                                                                                                                                                                                                                                                                                                                                                                                                                                                                                                                                                                                                                                                                                                                                                                                                                                                                                                                                                                                                                                                                                                                                                                                                                                                                                                                                                                                                                                                                                                                                                                                                                                                                                                                                                                                                                                                                                                                                                                                                                                                                                                                                                                                                                                                                                                                                                                                                                                                                                                                                                                                                                                                                                                                                                                                                                                                                                                                                                                                                                                                                                                                                                                                                                                                                                                                                                                                                                                                                                                                                                                                                                                                                                                                                                                                                                                                                                                                                   | Lighthouse Lab in Glasgow                                                                                   | Wellcome Sanger Institute for the COVID-19 Genomics UK (COG-UK) consortium                                             | Anna Dominiczak and Alex Alderton; Carol Clugston; Cordelia Langford; David Gray; David K. Jackson; Dominic Kwiatkowski; Ewan Harrison; Harper VanSteenhouse; Ian Johnston; John Sillitoe; John Sillitoe on behalf of the Wellcome Sanger Institute COVID-19 Surveillance Team (http://www.sanger.ac.uk/covid-team); Roberto Amato; Sonia Goncalves; Yumi Kasai                                                                                                                                                                                                                                                                                                                                                                                           |
| EPI_ISL_1806897, EPI_ISL_1806899, EPI_ISL_1806900, EPI_ISL_1806901, EPI_ISL_1806902, EPI_ISL_1806903, EPI_ISL_1806905, EPI_ISL_1829218, EPI_ISL_1829280, EPI_ISL_1829449, EPI_ISL_1831275, EPI_ISL_1912752, EPI_ISL_1912753, EPI_ISL_1912757, EPI_ISL_1912758, EPI_ISL_1939714, EPI_ISL_1985832, EPI_ISL_1986101, EPI_ISL_2006668, EPI_ISL_2022513, EPI_ISL_2022526, EPI_ISL_2023030, EPI_ISL_2023031, EPI_ISL_2091666, EPI_ISL_2199981, EPI_ISL_2199982, EPI_ISL_2254122                                                                                                                                                                                                                                                                                                                                                                                                                                                                                                                                                                                                                                                                                                                                                                                                                                                                                                                                                                                                                                                                                                                                                                                                                                                                                                                                                                                                                                                                                                                                                                                                                                                                                                                                                                                                                                                                                                                                                                                                                                                                                                                                                                                                                                                                                                                                                                                                                                                                                                                                                                                                                                                                                                                                                                                                                                                                                                                                                                                                                                                                                                                                                                                                                                                                                                                                                                                                                                                                                                                                                                                                                                                                                                                                                                                                                                                                                                                                                                                                                                                                                                                                                                                                                                                                                                                                                                                                                                                                                                                                                                                                                                                        | Lighthouse Lab in Milton Keynes                                                                             | Wellcome Sanger Institute for the COVID-19 Genomics UK (COG-UK) Consortium                                             | Cordelia Langford; David K. Jackson; Dominic Kwiatkowski; Ewan Harrison; Ian Johnston; Jeffrey Barrett; John Sillitoe on behalf of the Wellcome Sanger Institute COVID-19 Surveillance Team; Roberto Amato; Sonia Goncalves; The Lighthouse Lab in Milton Keynes and Alex Alderton                                                                                                                                                                                                                                                                                                                                                                                                                                                                        |
| EPI_ISL_1908494, EPI_ISL_1936188, EPI_ISL_2598080                                                                                                                                                                                                                                                                                                                                                                                                                                                                                                                                                                                                                                                                                                                                                                                                                                                                                                                                                                                                                                                                                                                                                                                                                                                                                                                                                                                                                                                                                                                                                                                                                                                                                                                                                                                                                                                                                                                                                                                                                                                                                                                                                                                                                                                                                                                                                                                                                                                                                                                                                                                                                                                                                                                                                                                                                                                                                                                                                                                                                                                                                                                                                                                                                                                                                                                                                                                                                                                                                                                                                                                                                                                                                                                                                                                                                                                                                                                                                                                                                                                                                                                                                                                                                                                                                                                                                                                                                                                                                                                                                                                                                                                                                                                                                                                                                                                                                                                                                                                                                                                                                | MD PHL                                                                                                      | MD PHL                                                                                                                 | Maryland Department of Health Laboratories Administration                                                                                                                                                                                                                                                                                                                                                                                                                                                                                                                                                                                                                                                                                                 |
| EPI_ISL_1447036                                                                                                                                                                                                                                                                                                                                                                                                                                                                                                                                                                                                                                                                                                                                                                                                                                                                                                                                                                                                                                                                                                                                                                                                                                                                                                                                                                                                                                                                                                                                                                                                                                                                                                                                                                                                                                                                                                                                                                                                                                                                                                                                                                                                                                                                                                                                                                                                                                                                                                                                                                                                                                                                                                                                                                                                                                                                                                                                                                                                                                                                                                                                                                                                                                                                                                                                                                                                                                                                                                                                                                                                                                                                                                                                                                                                                                                                                                                                                                                                                                                                                                                                                                                                                                                                                                                                                                                                                                                                                                                                                                                                                                                                                                                                                                                                                                                                                                                                                                                                                                                                                                                  | MI - Michigan Department of Health and Human Services - Bureau of Laboratories                              | Centers for Disease Control and Prevention Division of Viral Diseases, Pathogen Discovery                              | Alison Laufer Halpin; Ben L. Rambo-Martin; Clinton R. Paden; Dakota Howard; Darlene Wagner; Dave Wentworth; Dhvani Batra; Jasmine Padilla; Justin Lee; Katie Dillon; Krista Queen; Kristen Knipe; Kristine Lacek; Mark Burroughs; Matthew Schmerer; Mili Sheth; Peter Cook; Sam Shepard; Sarah Nobles; Shoshona Le; Suxiang Tong; Vivien Dugan; Yvette Unorunmi                                                                                                                                                                                                                                                                                                                                                                                           |
| EPI_ISL_1373999                                                                                                                                                                                                                                                                                                                                                                                                                                                                                                                                                                                                                                                                                                                                                                                                                                                                                                                                                                                                                                                                                                                                                                                                                                                                                                                                                                                                                                                                                                                                                                                                                                                                                                                                                                                                                                                                                                                                                                                                                                                                                                                                                                                                                                                                                                                                                                                                                                                                                                                                                                                                                                                                                                                                                                                                                                                                                                                                                                                                                                                                                                                                                                                                                                                                                                                                                                                                                                                                                                                                                                                                                                                                                                                                                                                                                                                                                                                                                                                                                                                                                                                                                                                                                                                                                                                                                                                                                                                                                                                                                                                                                                                                                                                                                                                                                                                                                                                                                                                                                                                                                                                  | MO State Public Health Laboratory                                                                           | Pathogen Discovery, Respiratory Viruses Branch, Division of Viral Diseases, Centers for Disease Control and Prevention | Anna Kelleher; Anna Uehara; Brian Lynch; Clinton R. Paden; Haibin Wang; Han Jia Justin Ng; Jing Zhang; Krista Queen; Peter Cook; Suxiang Tong; Yan Li; Ying Tao                                                                                                                                                                                                                                                                                                                                                                                                                                                                                                                                                                                           |
| EPI_ISL_2346381, EPI_ISL_2346386, EPI_ISL_2346388, EPI_ISL_2346402, EPI_ISL_2346409, EPI_ISL_2346415, EPI_ISL_2346419, EPI_ISL_2346420, EPI_ISL_2346422, EPI_ISL_2346427, EPI_ISL_2346428, EPI_ISL_2346434                                                                                                                                                                                                                                                                                                                                                                                                                                                                                                                                                                                                                                                                                                                                                                                                                                                                                                                                                                                                                                                                                                                                                                                                                                                                                                                                                                                                                                                                                                                                                                                                                                                                                                                                                                                                                                                                                                                                                                                                                                                                                                                                                                                                                                                                                                                                                                                                                                                                                                                                                                                                                                                                                                                                                                                                                                                                                                                                                                                                                                                                                                                                                                                                                                                                                                                                                                                                                                                                                                                                                                                                                                                                                                                                                                                                                                                                                                                                                                                                                                                                                                                                                                                                                                                                                                                                                                                                                                                                                                                                                                                                                                                                                                                                                                                                                                                                                                                       | see above                                                                                                   | MRC/UVRI & LSHTM Uganda Research Unit, Central Public Health Laboratories                                              | Dan Lule Bugembe; Isaac Sseeewanyana; Matthew Cotten; My V.T. Phan; Patrick Semanda; Pontiano Kaleebu; Susan Nabadda                                                                                                                                                                                                                                                                                                                                                                                                                                                                                                                                                                                                                                      |
| EPI_ISL_1970565, EPI_ISL_1970566, EPI_ISL_1970567, EPI_ISL_1970568                                                                                                                                                                                                                                                                                                                                                                                                                                                                                                                                                                                                                                                                                                                                                                                                                                                                                                                                                                                                                                                                                                                                                                                                                                                                                                                                                                                                                                                                                                                                                                                                                                                                                                                                                                                                                                                                                                                                                                                                                                                                                                                                                                                                                                                                                                                                                                                                                                                                                                                                                                                                                                                                                                                                                                                                                                                                                                                                                                                                                                                                                                                                                                                                                                                                                                                                                                                                                                                                                                                                                                                                                                                                                                                                                                                                                                                                                                                                                                                                                                                                                                                                                                                                                                                                                                                                                                                                                                                                                                                                                                                                                                                                                                                                                                                                                                                                                                                                                                                                                                                               | MRC/UVRI & LSHTM Uganda Research Unit                                                                       | MRC/UVRI & LSHTM Uganda Research Unit                                                                                  | Dan Lule Bugembe; Isaac Sseeewanyana; Matthew Cotten; My V.T. Phan; Patrick Semanda; Pontiano Kaleebu; Susan Nabadda                                                                                                                                                                                                                                                                                                                                                                                                                                                                                                                                                                                                                                      |
| EPI_ISL_1469351, EPI_ISL_1469365, EPI_ISL_1469379                                                                                                                                                                                                                                                                                                                                                                                                                                                                                                                                                                                                                                                                                                                                                                                                                                                                                                                                                                                                                                                                                                                                                                                                                                                                                                                                                                                                                                                                                                                                                                                                                                                                                                                                                                                                                                                                                                                                                                                                                                                                                                                                                                                                                                                                                                                                                                                                                                                                                                                                                                                                                                                                                                                                                                                                                                                                                                                                                                                                                                                                                                                                                                                                                                                                                                                                                                                                                                                                                                                                                                                                                                                                                                                                                                                                                                                                                                                                                                                                                                                                                                                                                                                                                                                                                                                                                                                                                                                                                                                                                                                                                                                                                                                                                                                                                                                                                                                                                                                                                                                                                | MRC/UVRI & LSHTM Uganda Research Unit                                                                       | Where sequence data have been generated and submitted to GISAID                                                        | Dan Lule Bugembe; Isaac Sseeewanyana; Matthew Cotten; My V.T. Phan; Patrick Semanda; Pontiano Kaleebu; Susan Nabadda                                                                                                                                                                                                                                                                                                                                                                                                                                                                                                                                                                                                                                      |
| EPI_ISL_2348511                                                                                                                                                                                                                                                                                                                                                                                                                                                                                                                                                                                                                                                                                                                                                                                                                                                                                                                                                                                                                                                                                                                                                                                                                                                                                                                                                                                                                                                                                                                                                                                                                                                                                                                                                                                                                                                                                                                                                                                                                                                                                                                                                                                                                                                                                                                                                                                                                                                                                                                                                                                                                                                                                                                                                                                                                                                                                                                                                                                                                                                                                                                                                                                                                                                                                                                                                                                                                                                                                                                                                                                                                                                                                                                                                                                                                                                                                                                                                                                                                                                                                                                                                                                                                                                                                                                                                                                                                                                                                                                                                                                                                                                                                                                                                                                                                                                                                                                                                                                                                                                                                                                  | MRC/UVRI & LSHTM Uganda Research Unit, Central Public Health Laboratories                                   | MRC/UVRI & LSHTM Uganda Research Unit, Central Public Health Laboratories                                              | Dan Lule Bugembe; Isaac Sseeewanyana; Matthew Cotten; My V.T. Phan; Patrick Semanda; Pontiano Kaleebu; Susan Nabadda                                                                                                                                                                                                                                                                                                                                                                                                                                                                                                                                                                                                                                      |
| EPI_ISL_2690505                                                                                                                                                                                                                                                                                                                                                                                                                                                                                                                                                                                                                                                                                                                                                                                                                                                                                                                                                                                                                                                                                                                                                                                                                                                                                                                                                                                                                                                                                                                                                                                                                                                                                                                                                                                                                                                                                                                                                                                                                                                                                                                                                                                                                                                                                                                                                                                                                                                                                                                                                                                                                                                                                                                                                                                                                                                                                                                                                                                                                                                                                                                                                                                                                                                                                                                                                                                                                                                                                                                                                                                                                                                                                                                                                                                                                                                                                                                                                                                                                                                                                                                                                                                                                                                                                                                                                                                                                                                                                                                                                                                                                                                                                                                                                                                                                                                                                                                                                                                                                                                                                                                  | MRC/UVRI & LSHTM Uganda Research Unit, Central Public Health Laboratories, Rakai Health Sciences Program    | MRC/UVRI & LSHTM Uganda Research Unit, Central Public Health Laboratories                                              | Dan Lule Bugembe; Hellen Nansumba; Isaac Sseeewanyana; Matthew Cotten; My V.T. Phan; Patrick Semanda; Pontiano Kaleebu; Susan Nabadda                                                                                                                                                                                                                                                                                                                                                                                                                                                                                                                                                                                                                     |
| EPI_ISL_2290768, EPI_ISL_2290769                                                                                                                                                                                                                                                                                                                                                                                                                                                                                                                                                                                                                                                                                                                                                                                                                                                                                                                                                                                                                                                                                                                                                                                                                                                                                                                                                                                                                                                                                                                                                                                                                                                                                                                                                                                                                                                                                                                                                                                                                                                                                                                                                                                                                                                                                                                                                                                                                                                                                                                                                                                                                                                                                                                                                                                                                                                                                                                                                                                                                                                                                                                                                                                                                                                                                                                                                                                                                                                                                                                                                                                                                                                                                                                                                                                                                                                                                                                                                                                                                                                                                                                                                                                                                                                                                                                                                                                                                                                                                                                                                                                                                                                                                                                                                                                                                                                                                                                                                                                                                                                                                                 | MSHS Clinical Microbiology Laboratories                                                                     | MSHS Pathogen Surveillance Program                                                                                     | Adolfo García-Sastre; Adriana van de Gucht; Ajay Obia; Alberto Paniz-Mondolfi; Ana S. Gonzalez-Reiche; Angela Amoako; Ashley Salimbango; Betsaida Salom Melo; Bremy Alburquerque; Brianne Ciferri; Charles Gleason; Daniel Floda; Deena R. Altman; Denise Jurczynak; Emilia Mía Sordillo; Gintaras Deikus; Giulio Kleiner; Gopi Patel; Hala Alshammary; Harm van Babel; Irina Oussenko; Jayeeta Dutta; Juan Soto; Julia Matthews; Katherine Beach; Kathryn Twyman; Kayla Russo; Komal Srivastava; Levy Sominsky; Mahmoud Awadwa; Marta Luksa; Matthew M. Hernandez; Melissa Gitman; Michael D. Nowak; Mitchell J. Sullivan; Nancy Francoeur; Robert Sebra; Sarah Schaefer; Sheldie Fabre; Shwetha Hara Sridhar; Viviana Simon; Ying-Chih Wang; Zenab Khan |
| EPI_ISL_1446480, EPI_ISL_2787805                                                                                                                                                                                                                                                                                                                                                                                                                                                                                                                                                                                                                                                                                                                                                                                                                                                                                                                                                                                                                                                                                                                                                                                                                                                                                                                                                                                                                                                                                                                                                                                                                                                                                                                                                                                                                                                                                                                                                                                                                                                                                                                                                                                                                                                                                                                                                                                                                                                                                                                                                                                                                                                                                                                                                                                                                                                                                                                                                                                                                                                                                                                                                                                                                                                                                                                                                                                                                                                                                                                                                                                                                                                                                                                                                                                                                                                                                                                                                                                                                                                                                                                                                                                                                                                                                                                                                                                                                                                                                                                                                                                                                                                                                                                                                                                                                                                                                                                                                                                                                                                                                                 | MT Public Health Laboratory                                                                                 | Centers for Disease Control and Prevention Division of Viral Diseases, Pathogen Discovery                              | Alison Laufer Halpin; Ben L. Rambo-Martin; Clinton R. Paden; Dakota Howard; Darlene Wagner; Dave Wentworth; Dhvani Batra; Jasmine Padilla; Justin Lee; Katie Dillon; Krista Queen; Kristen Knipe; Kristine Lacek; Mark Burroughs; Matthew Schmerer; Mili Sheth; Peter Cook; Sam Shepard; Sarah Nobles; Shoshona Le; Suxiang Tong; Vivien Dugan; Yvette Unorunmi                                                                                                                                                                                                                                                                                                                                                                                           |
| EPI_ISL_1482810, EPI_ISL_1482857, EPI_ISL_1482906                                                                                                                                                                                                                                                                                                                                                                                                                                                                                                                                                                                                                                                                                                                                                                                                                                                                                                                                                                                                                                                                                                                                                                                                                                                                                                                                                                                                                                                                                                                                                                                                                                                                                                                                                                                                                                                                                                                                                                                                                                                                                                                                                                                                                                                                                                                                                                                                                                                                                                                                                                                                                                                                                                                                                                                                                                                                                                                                                                                                                                                                                                                                                                                                                                                                                                                                                                                                                                                                                                                                                                                                                                                                                                                                                                                                                                                                                                                                                                                                                                                                                                                                                                                                                                                                                                                                                                                                                                                                                                                                                                                                                                                                                                                                                                                                                                                                                                                                                                                                                                                                                | MUSC Molecular Pathology Laboratory                                                                         | MUSC Molecular Pathology Laboratory                                                                                    | Dariusz Pytel; Frederick S. Nolte; Jaclyn Dunne; Julie W. Hirschhorn; Kristen Maurer; W. Bailey Glen Jr                                                                                                                                                                                                                                                                                                                                                                                                                                                                                                                                                                                                                                                   |
| EPI_ISL_648548                                                                                                                                                                                                                                                                                                                                                                                                                                                                                                                                                                                                                                                                                                                                                                                                                                                                                                                                                                                                                                                                                                                                                                                                                                                                                                                                                                                                                                                                                                                                                                                                                                                                                                                                                                                                                                                                                                                                                                                                                                                                                                                                                                                                                                                                                                                                                                                                                                                                                                                                                                                                                                                                                                                                                                                                                                                                                                                                                                                                                                                                                                                                                                                                                                                                                                                                                                                                                                                                                                                                                                                                                                                                                                                                                                                                                                                                                                                                                                                                                                                                                                                                                                                                                                                                                                                                                                                                                                                                                                                                                                                                                                                                                                                                                                                                                                                                                                                                                                                                                                                                                                                   | Madera County Department of Public Health                                                                   | Chan-Zuckerberg Biohub                                                                                                 | CZB Cliahub Consortium                                                                                                                                                                                                                                                                                                                                                                                                                                                                                                                                                                                                                                                                                                                                    |
| EPI_ISL_1372628                                                                                                                                                                                                                                                                                                                                                                                                                                                                                                                                                                                                                                                                                                                                                                                                                                                                                                                                                                                                                                                                                                                                                                                                                                                                                                                                                                                                                                                                                                                                                                                                                                                                                                                                                                                                                                                                                                                                                                                                                                                                                                                                                                                                                                                                                                                                                                                                                                                                                                                                                                                                                                                                                                                                                                                                                                                                                                                                                                                                                                                                                                                                                                                                                                                                                                                                                                                                                                                                                                                                                                                                                                                                                                                                                                                                                                                                                                                                                                                                                                                                                                                                                                                                                                                                                                                                                                                                                                                                                                                                                                                                                                                                                                                                                                                                                                                                                                                                                                                                                                                                                                                  | Maine Health and Environmental Testing Laboratory                                                           | Tewhey Lab, The Jackson Laboratory                                                                                     | Barter, M.; Dewey, H.; H. and Tewhey, R.; Isoue, F.; Lynch, R.; Matluk, N.; Munger                                                                                                                                                                                                                                                                                                                                                                                                                                                                                                                                                                                                                                                                        |
| EPI_ISL_2646554, EPI_ISL_2647882, EPI_ISL_2786052, EPI_ISL_2786288, EPI_ISL_2786444, EPI_ISL_2786497                                                                                                                                                                                                                                                                                                                                                                                                                                                                                                                                                                                                                                                                                                                                                                                                                                                                                                                                                                                                                                                                                                                                                                                                                                                                                                                                                                                                                                                                                                                                                                                                                                                                                                                                                                                                                                                                                                                                                                                                                                                                                                                                                                                                                                                                                                                                                                                                                                                                                                                                                                                                                                                                                                                                                                                                                                                                                                                                                                                                                                                                                                                                                                                                                                                                                                                                                                                                                                                                                                                                                                                                                                                                                                                                                                                                                                                                                                                                                                                                                                                                                                                                                                                                                                                                                                                                                                                                                                                                                                                                                                                                                                                                                                                                                                                                                                                                                                                                                                                                                             | Mako Medical                                                                                                | Centers for Disease Control and Prevention Division of Viral Diseases, Pathogen Discovery                              | Adrian Paskey; Benjamin Rambo-Martin; Christopher Gulvick; Clinton R. Paden; Dakota Howard; Darlene Wagner; Dhvani Batra; Duncan MacCannell; Jason Caravas; Kara Moser; Lauren Moon; Matthew Schmerer; Matthew Tugwell; Peter W. Cook; Scott Sammons; Shatavia Morrison; Yvette Unorunmi                                                                                                                                                                                                                                                                                                                                                                                                                                                                  |
| EPI_ISL_528743                                                                                                                                                                                                                                                                                                                                                                                                                                                                                                                                                                                                                                                                                                                                                                                                                                                                                                                                                                                                                                                                                                                                                                                                                                                                                                                                                                                                                                                                                                                                                                                                                                                                                                                                                                                                                                                                                                                                                                                                                                                                                                                                                                                                                                                                                                                                                                                                                                                                                                                                                                                                                                                                                                                                                                                                                                                                                                                                                                                                                                                                                                                                                                                                                                                                                                                                                                                                                                                                                                                                                                                                                                                                                                                                                                                                                                                                                                                                                                                                                                                                                                                                                                                                                                                                                                                                                                                                                                                                                                                                                                                                                                                                                                                                                                                                                                                                                                                                                                                                                                                                                                                   | Malaysia Genome Institute                                                                                   | Malaysia Genome Institute                                                                                              | Azrin Ahmad; Enizza Kasim; Irni Suhayu Sapian; Mohd Faizal Abu Bakar; Mohd Noor Mat Isa; Nor Azfa Johari; Nurhezreen Md Iqbal; Shahruil Hisham Zainal Ariffin; Shamsidar Sopi; Siti Noraini Othman; Yusuf Muhammad Noor                                                                                                                                                                                                                                                                                                                                                                                                                                                                                                                                   |
| see above                                                                                                                                                                                                                                                                                                                                                                                                                                                                                                                                                                                                                                                                                                                                                                                                                                                                                                                                                                                                                                                                                                                                                                                                                                                                                                                                                                                                                                                                                                                                                                                                                                                                                                                                                                                                                                                                                                                                                                                                                                                                                                                                                                                                                                                                                                                                                                                                                                                                                                                                                                                                                                                                                                                                                                                                                                                                                                                                                                                                                                                                                                                                                                                                                                                                                                                                                                                                                                                                                                                                                                                                                                                                                                                                                                                                                                                                                                                                                                                                                                                                                                                                                                                                                                                                                                                                                                                                                                                                                                                                                                                                                                                                                                                                                                                                                                                                                                                                                                                                                                                                                                                        | Maryland Genomics, Institute for Genome Sciences, University of Maryland School of Medicine                 | Maryland Genomics, Institute for Genome Sciences, University of Maryland School of Medicine                            | Aditya; Claire M; Fraser; Holly; Humphrys; Jacques; Kranthi; Lisa D; Luke J; Mehta; Mike; Ott; Ravel; Roussey; Sadzewicz; Sandra; Tallon; Vavikolanu                                                                                                                                                                                                                                                                                                                                                                                                                                                                                                                                                                                                      |
| EPI_ISL_765770, EPI_ISL_765805                                                                                                                                                                                                                                                                                                                                                                                                                                                                                                                                                                                                                                                                                                                                                                                                                                                                                                                                                                                                                                                                                                                                                                                                                                                                                                                                                                                                                                                                                                                                                                                                                                                                                                                                                                                                                                                                                                                                                                                                                                                                                                                                                                                                                                                                                                                                                                                                                                                                                                                                                                                                                                                                                                                                                                                                                                                                                                                                                                                                                                                                                                                                                                                                                                                                                                                                                                                                                                                                                                                                                                                                                                                                                                                                                                                                                                                                                                                                                                                                                                                                                                                                                                                                                                                                                                                                                                                                                                                                                                                                                                                                                                                                                                                                                                                                                                                                                                                                                                                                                                                                                                   | Massachusetts General Hospital                                                                              | Infectious Disease Program, Broad Institute of Harvard and MIT                                                         | A.E.; Adams, G.; Anahtar, M.; B.L.; B.W.; Bauer, M.; Birren; Branda, J.; Carter, A.; Cerrato, F.; Chaluviadi, S.; Chapman; Cusick, C.; D.J.; DeRuff, K.; E. and Sabeti; Flowers, K.; Gallagher, G.; Gladden-Young, A.; Gnrke, A.; Harris, J.; J.E.; K.J.; LaRocque, R.; Lagerborg, K.; Lemieux; Lin; Loreth, C.; Macinnis; Neumann, A.; Normandin, E.; P.C.; Park; Pierce, V.; Reilly, S.; Rosenberg; Rudy, M.; Ryan, E.; S.B.; Shaw, B.; Siddle; Slater, D.; Smole, S.; Tomkins-Tinch, C.; Turbett, S.                                                                                                                                                                                                                                                   |
| EPI_ISL_1232396, EPI_ISL_1503654, EPI_ISL_1527109, EPI_ISL_1624659, EPI_ISL_2008146, EPI_ISL_2008162, EPI_ISL_2008164, EPI_ISL_2008369, EPI_ISL_2292531, EPI_ISL_2668817                                                                                                                                                                                                                                                                                                                                                                                                                                                                                                                                                                                                                                                                                                                                                                                                                                                                                                                                                                                                                                                                                                                                                                                                                                                                                                                                                                                                                                                                                                                                                                                                                                                                                                                                                                                                                                                                                                                                                                                                                                                                                                                                                                                                                                                                                                                                                                                                                                                                                                                                                                                                                                                                                                                                                                                                                                                                                                                                                                                                                                                                                                                                                                                                                                                                                                                                                                                                                                                                                                                                                                                                                                                                                                                                                                                                                                                                                                                                                                                                                                                                                                                                                                                                                                                                                                                                                                                                                                                                                                                                                                                                                                                                                                                                                                                                                                                                                                                                                         | see above                                                                                                   | Massachusetts State Public Health Laboratory                                                                           | Andrew Lang; Glen Gallagher; Sandra Smole; Timelia Fink                                                                                                                                                                                                                                                                                                                                                                                                                                                                                                                                                                                                                                                                                                   |
| EPI_ISL_456377, EPI_ISL_456378                                                                                                                                                                                                                                                                                                                                                                                                                                                                                                                                                                                                                                                                                                                                                                                                                                                                                                                                                                                                                                                                                                                                                                                                                                                                                                                                                                                                                                                                                                                                                                                                                                                                                                                                                                                                                                                                                                                                                                                                                                                                                                                                                                                                                                                                                                                                                                                                                                                                                                                                                                                                                                                                                                                                                                                                                                                                                                                                                                                                                                                                                                                                                                                                                                                                                                                                                                                                                                                                                                                                                                                                                                                                                                                                                                                                                                                                                                                                                                                                                                                                                                                                                                                                                                                                                                                                                                                                                                                                                                                                                                                                                                                                                                                                                                                                                                                                                                                                                                                                                                                                                                   | MedLab Central Ltd                                                                                          | Institute of Environmental Science and Research (ESR)                                                                  | Anja Werno; Antje van der Linden; Arlo Upton; Chris Mansell; David Hammer; Dragana Drinkovic; Gary McAuliffe; Hana Sofia Andersson; James Ussher; Jill Sherwood; Joep de Ligt; Josh Freeman; Julia Howard; Juliet Elvy; Lauren Jelly; Mary DeAlmeida; Matt Blakiston; Matt Storey; Matthew Rogers; Max Bloomfield; Michael Addidle; Michelle Balm; Sally Roberts; Sarah Jefferies; Sharmini Mutaiyah; Susan Morpeth; Susan Taylor; Timothy Blackmore; Vani Sathyendran; Veronica Playle; Virginia Hope; Xiaoyun Ren                                                                                                                                                                                                                                       |
| EPI_ISL_1508843, EPI_ISL_1508847                                                                                                                                                                                                                                                                                                                                                                                                                                                                                                                                                                                                                                                                                                                                                                                                                                                                                                                                                                                                                                                                                                                                                                                                                                                                                                                                                                                                                                                                                                                                                                                                                                                                                                                                                                                                                                                                                                                                                                                                                                                                                                                                                                                                                                                                                                                                                                                                                                                                                                                                                                                                                                                                                                                                                                                                                                                                                                                                                                                                                                                                                                                                                                                                                                                                                                                                                                                                                                                                                                                                                                                                                                                                                                                                                                                                                                                                                                                                                                                                                                                                                                                                                                                                                                                                                                                                                                                                                                                                                                                                                                                                                                                                                                                                                                                                                                                                                                                                                                                                                                                                                                 | Medical Genetics Laboratory, Regional Centre of Medical Genetics, Emergency County Hospital Craiova         | Medical Genetics Laboratory, Regional Centre of Medical Genetics, Emergency County Hospital Craiova                    | Adina Dragos; Ana-Maria Buga; Anca-Lelia (Riza) Costache; Andrei Pirvu; Elena Plesea; Ioana Streata; Mihai Cucu; Mihai Ioana; Monica Cara; Razvan Plesea; Stefania Dorobantu                                                                                                                                                                                                                                                                                                                                                                                                                                                                                                                                                                              |
| EPI_ISL_2107512, EPI_ISL_2107524, EPI_ISL_2107525, EPI_ISL_2107526                                                                                                                                                                                                                                                                                                                                                                                                                                                                                                                                                                                                                                                                                                                                                                                                                                                                                                                                                                                                                                                                                                                                                                                                                                                                                                                                                                                                                                                                                                                                                                                                                                                                                                                                                                                                                                                                                                                                                                                                                                                                                                                                                                                                                                                                                                                                                                                                                                                                                                                                                                                                                                                                                                                                                                                                                                                                                                                                                                                                                                                                                                                                                                                                                                                                                                                                                                                                                                                                                                                                                                                                                                                                                                                                                                                                                                                                                                                                                                                                                                                                                                                                                                                                                                                                                                                                                                                                                                                                                                                                                                                                                                                                                                                                                                                                                                                                                                                                                                                                                                                               | Medical Laboratory Sciences, Arab American University                                                       | Medical Laboratory Sciences, Arab American University                                                                  | Al-Jawabreh, A.; Al-Jawabreh, H.; Dumaidi, K.; Eregat, S.; Nasereddin, A.                                                                                                                                                                                                                                                                                                                                                                                                                                                                                                                                                                                                                                                                                 |
| EPI_ISL_2450073, EPI_ISL_2483192                                                                                                                                                                                                                                                                                                                                                                                                                                                                                                                                                                                                                                                                                                                                                                                                                                                                                                                                                                                                                                                                                                                                                                                                                                                                                                                                                                                                                                                                                                                                                                                                                                                                                                                                                                                                                                                                                                                                                                                                                                                                                                                                                                                                                                                                                                                                                                                                                                                                                                                                                                                                                                                                                                                                                                                                                                                                                                                                                                                                                                                                                                                                                                                                                                                                                                                                                                                                                                                                                                                                                                                                                                                                                                                                                                                                                                                                                                                                                                                                                                                                                                                                                                                                                                                                                                                                                                                                                                                                                                                                                                                                                                                                                                                                                                                                                                                                                                                                                                                                                                                                                                 | Medical Microbiology Unit, Department for Laboratory Medicine, Drammen Hospital, Vestre Viken Health Trust, | Norwegian Institute of Public Health, Department of Virology                                                           | Atiya R Ali; Debec Nadia; Engebretsen Serina Beate; Garcia Llorente Ignacio; Hilde Elshaug; Hilde Vollan; Jon Bråte; Kamilla Heddeland Instefjord; Karoline Bragstad; Kathrine Stene-Johansen; Line Victoria Moen; Marie Paulsen Madsen; Olav Hungenes; Pedersen Benedicte Nevjen; Rasmus Riis Kopperud                                                                                                                                                                                                                                                                                                                                                                                                                                                   |
| EPI_ISL_2102114                                                                                                                                                                                                                                                                                                                                                                                                                                                                                                                                                                                                                                                                                                                                                                                                                                                                                                                                                                                                                                                                                                                                                                                                                                                                                                                                                                                                                                                                                                                                                                                                                                                                                                                                                                                                                                                                                                                                                                                                                                                                                                                                                                                                                                                                                                                                                                                                                                                                                                                                                                                                                                                                                                                                                                                                                                                                                                                                                                                                                                                                                                                                                                                                                                                                                                                                                                                                                                                                                                                                                                                                                                                                                                                                                                                                                                                                                                                                                                                                                                                                                                                                                                                                                                                                                                                                                                                                                                                                                                                                                                                                                                                                                                                                                                                                                                                                                                                                                                                                                                                                                                                  | Medics Labor AG                                                                                             | Clinical Bacteriology                                                                                                  | Adrian Egli; Alfredo Mari; Hans Hirsch; Helena MB Seth-Smith; Julia Bielicki; Karoline Leuzinger; Madlen Stange; Manuel Battegay; Tim Roloff                                                                                                                                                                                                                                                                                                                                                                                                                                                                                                                                                                                                              |
| EPI_ISL_480336                                                                                                                                                                                                                                                                                                                                                                                                                                                                                                                                                                                                                                                                                                                                                                                                                                                                                                                                                                                                                                                                                                                                                                                                                                                                                                                                                                                                                                                                                                                                                                                                                                                                                                                                                                                                                                                                                                                                                                                                                                                                                                                                                                                                                                                                                                                                                                                                                                                                                                                                                                                                                                                                                                                                                                                                                                                                                                                                                                                                                                                                                                                                                                                                                                                                                                                                                                                                                                                                                                                                                                                                                                                                                                                                                                                                                                                                                                                                                                                                                                                                                                                                                                                                                                                                                                                                                                                                                                                                                                                                                                                                                                                                                                                                                                                                                                                                                                                                                                                                                                                                                                                   | Microbial Genomics Laboratory, Institut Pasteur de Montevideo                                               | Microbial Genomics Laboratory, Institut Pasteur de Montevideo                                                          | Cecilia Salazar; Gonzalo Moratorio; Gregorio Iraola; Ignacio Ferrás; Marianoel Pereira; Pilar Moreno                                                                                                                                                                                                                                                                                                                                                                                                                                                                                                                                                                                                                                                      |
| EPI_ISL_2650303                                                                                                                                                                                                                                                                                                                                                                                                                                                                                                                                                                                                                                                                                                                                                                                                                                                                                                                                                                                                                                                                                                                                                                                                                                                                                                                                                                                                                                                                                                                                                                                                                                                                                                                                                                                                                                                                                                                                                                                                                                                                                                                                                                                                                                                                                                                                                                                                                                                                                                                                                                                                                                                                                                                                                                                                                                                                                                                                                                                                                                                                                                                                                                                                                                                                                                                                                                                                                                                                                                                                                                                                                                                                                                                                                                                                                                                                                                                                                                                                                                                                                                                                                                                                                                                                                                                                                                                                                                                                                                                                                                                                                                                                                                                                                                                                                                                                                                                                                                                                                                                                                                                  | Microbiology Department, Laboratori Clínic Metropolitana Nord, Hospital Universitari Germans Trias i Pujol  | Can Rutí SARS-CoV-2 Sequencing Hub (HUGTIP/IRIS/Caixa/IGTP)                                                            | Alba Sánchez; Anna Not; Antoni E Bordoy; Bonaventura Clotet; Cristina Casañ; Cristina Esteban; Francesc Catala-Molà; Gemma Clara; Ignacio Blanco; Marc Noguera-Julian; Maria Casadellà; Mariona Parera; Mercedes Guerrero; Montserrat Giménez; Pere-Joan Cardona; Pilar Armengol; Roger Paredes; Verónica Saludes; and Elisa Marto on behalf of the Can Rutí SARS-CoV-2 Sequencing Hub.                                                                                                                                                                                                                                                                                                                                                                   |
| EPI_ISL_1208559, EPI_ISL_1999791                                                                                                                                                                                                                                                                                                                                                                                                                                                                                                                                                                                                                                                                                                                                                                                                                                                                                                                                                                                                                                                                                                                                                                                                                                                                                                                                                                                                                                                                                                                                                                                                                                                                                                                                                                                                                                                                                                                                                                                                                                                                                                                                                                                                                                                                                                                                                                                                                                                                                                                                                                                                                                                                                                                                                                                                                                                                                                                                                                                                                                                                                                                                                                                                                                                                                                                                                                                                                                                                                                                                                                                                                                                                                                                                                                                                                                                                                                                                                                                                                                                                                                                                                                                                                                                                                                                                                                                                                                                                                                                                                                                                                                                                                                                                                                                                                                                                                                                                                                                                                                                                                                 | Microbiology Department, Laboratori Clínic Metropolitana Nord, Hospital Universitari Germans Trias i Pujol. | Can Rutí SARS-CoV-2 Sequencing Hub (HUGTIP/IRIS/Caixa/IGTP)                                                            | Alba Sánchez; Anna Not; Antoni E Bordoy; Bonaventura Clotet; Carol Gálvez Maria Casadellà; Cristina Casañ; Cristina Esteban; Francesc Catala-Molà; Gemma Clara; Ignacio Blanco; Irina Pey; Jordi Barretrina; Julia G Prado; Marc Noguera-Julian; Maria Casadellà; Mariona Parera; Mercedes Guerrero; Montserrat Giménez; Pere-Joan Cardona; Pilar Armengol; Roger Paredes; Verónica Saludes; and Elisa Marto on behalf of the Can Rutí SARS-CoV-2 Sequencing Hub.                                                                                                                                                                                                                                                                                         |
| EPI_ISL_456385, EPI_ISL_548132, EPI_ISL_548133, EPI_ISL_548144, EPI_ISL_548146, EPI_ISL_579102, EPI_ISL_622787, EPI_ISL_732968, EPI_ISL_755624, EPI_ISL_1082259, EPI_ISL_1113756, EPI_ISL_1113758, EPI_ISL_1113759, EPI_ISL_1135316, EPI_ISL_1135318, EPI_ISL_1469096, EPI_ISL_1469105, EPI_ISL_1621293, EPI_ISL_1967891, EPI_ISL_1967893, EPI_ISL_2406491                                                                                                                                                                                                                                                                                                                                                                                                                                                                                                                                                                                                                                                                                                                                                                                                                                                                                                                                                                                                                                                                                                                                                                                                                                                                                                                                                                                                                                                                                                                                                                                                                                                                                                                                                                                                                                                                                                                                                                                                                                                                                                                                                                                                                                                                                                                                                                                                                                                                                                                                                                                                                                                                                                                                                                                                                                                                                                                                                                                                                                                                                                                                                                                                                                                                                                                                                                                                                                                                                                                                                                                                                                                                                                                                                                                                                                                                                                                                                                                                                                                                                                                                                                                                                                                                                                                                                                                                                                                                                                                                                                                                                                                                                                                                                                       | see above                                                                                                   | Middlemore Hospital                                                                                                    | Anja Werno; Antje van der Linden; Arlo Upton; Chris Mansell; David Hammer; Dragana Drinkovic; Erasmus Smit; Gary McAuliffe; Hana Sofia Andersson; Hermes Perez; James Ussher; Jill Sherwood; Jing Wang; Joep de Ligt; Josh Freeman; Julia Howard; Juliet Elvy; Lauren Jelly; Mary DeAlmeida; Matt Blakiston; Matt Storey; Matthew Rogers; Max Bloomfield; Michael Addidle; Michelle Balm; Muhammad Faisal; Nikki Fred; Olin Silander; Olivia Stroeven; Paula Schols; Rachel Boyle; Sally Roberts; SallyAnn Harbison; Sarah Jefferies; Sharmini Mutaiyah; Susan Lin; Susan Morpeth; Susan Taylor; Timothy Blackmore; Vani Sathyendran; Veronica Playle; Virginia Hope; Xiaoyun Ren                                                                         |
| EPI_ISL_678279                                                                                                                                                                                                                                                                                                                                                                                                                                                                                                                                                                                                                                                                                                                                                                                                                                                                                                                                                                                                                                                                                                                                                                                                                                                                                                                                                                                                                                                                                                                                                                                                                                                                                                                                                                                                                                                                                                                                                                                                                                                                                                                                                                                                                                                                                                                                                                                                                                                                                                                                                                                                                                                                                                                                                                                                                                                                                                                                                                                                                                                                                                                                                                                                                                                                                                                                                                                                                                                                                                                                                                                                                                                                                                                                                                                                                                                                                                                                                                                                                                                                                                                                                                                                                                                                                                                                                                                                                                                                                                                                                                                                                                                                                                                                                                                                                                                                                                                                                                                                                                                                                                                   | Mikrobiologie, RARI                                                                                         | Mikrobiologie, RARI                                                                                                    | A.V.; Badanin, D.V.; E.A.; Fedorov; Guseva; Krasnov; Kutryev; N.A.; N.P.; Naryshkina; Portenko; S.A.; Sharapova; Shcherbakova; Sosodova; V.V.; Y.M.                                                                                                                                                                                                                                                                                                                                                                                                                                                                                                                                                                                                       |
| EPI_ISL_2379972, EPI_ISL_2379983, EPI_ISL_2380007                                                                                                                                                                                                                                                                                                                                                                                                                                                                                                                                                                                                                                                                                                                                                                                                                                                                                                                                                                                                                                                                                                                                                                                                                                                                                                                                                                                                                                                                                                                                                                                                                                                                                                                                                                                                                                                                                                                                                                                                                                                                                                                                                                                                                                                                                                                                                                                                                                                                                                                                                                                                                                                                                                                                                                                                                                                                                                                                                                                                                                                                                                                                                                                                                                                                                                                                                                                                                                                                                                                                                                                                                                                                                                                                                                                                                                                                                                                                                                                                                                                                                                                                                                                                                                                                                                                                                                                                                                                                                                                                                                                                                                                                                                                                                                                                                                                                                                                                                                                                                                                                                | Ministry of Health Hospitals                                                                                | Institute of Health and Community Medicine                                                                             | Chan Chia Jui; Chua Hock Hin; David Perera; Ooi Mong How; Tonnil Sia Loong Loong; Wong Jyn Shan; Wong Kling Aik                                                                                                                                                                                                                                                                                                                                                                                                                                                                                                                                                                                                                                           |

|                                                                                                                                                                                                                                                                                                                                                                                                                                                                                                                                                                                                  |                                                                                                                                                                                                                |                                                                                                                                                                                                                |                                                                                                                                                                                                                                                                                                                                                                                                                                                                                                                                  |
|--------------------------------------------------------------------------------------------------------------------------------------------------------------------------------------------------------------------------------------------------------------------------------------------------------------------------------------------------------------------------------------------------------------------------------------------------------------------------------------------------------------------------------------------------------------------------------------------------|----------------------------------------------------------------------------------------------------------------------------------------------------------------------------------------------------------------|----------------------------------------------------------------------------------------------------------------------------------------------------------------------------------------------------------------|----------------------------------------------------------------------------------------------------------------------------------------------------------------------------------------------------------------------------------------------------------------------------------------------------------------------------------------------------------------------------------------------------------------------------------------------------------------------------------------------------------------------------------|
| EPI_ISL_2535774,<br>EPI_ISL_2535776                                                                                                                                                                                                                                                                                                                                                                                                                                                                                                                                                              |                                                                                                                                                                                                                |                                                                                                                                                                                                                |                                                                                                                                                                                                                                                                                                                                                                                                                                                                                                                                  |
| EPI_ISL_1171908, EPI_ISL_1272166, EPI_ISL_1278224, EPI_ISL_1583169, EPI_ISL_1620528, EPI_ISL_1922101, EPI_ISL_2107322, EPI_ISL_2158049, EPI_ISL_2158057, EPI_ISL_2158065, EPI_ISL_2158066, EPI_ISL_2232626, EPI_ISL_2363624, EPI_ISL_2363755, EPI_ISL_2363758, EPI_ISL_2363775, EPI_ISL_2716318, EPI_ISL_2716319                                                                                                                                                                                                                                                                                 | see above                                                                                                                                                                                                      | Ministry of Health Turkey<br>Ministry of Health Turkey                                                                                                                                                         | Fatma Bayrakdar; Gulay Korukluoglu; Suleyman Yalcin; Yasemin Cosgun                                                                                                                                                                                                                                                                                                                                                                                                                                                              |
| EPI_ISL_1712690, EPI_ISL_1713201, EPI_ISL_1713310, EPI_ISL_1713462, EPI_ISL_1713623, EPI_ISL_1713637, EPI_ISL_1713663, EPI_ISL_1713673, EPI_ISL_1713677, EPI_ISL_1713690, EPI_ISL_1713714, EPI_ISL_1713728, EPI_ISL_1713751, EPI_ISL_1713767, EPI_ISL_2274323, EPI_ISL_2274379, EPI_ISL_2274381, EPI_ISL_2274383, EPI_ISL_2274397, EPI_ISL_2274399, EPI_ISL_2274404, EPI_ISL_2274410, EPI_ISL_2408244, EPI_ISL_2408315, EPI_ISL_2408316, EPI_ISL_2408321, EPI_ISL_2408324, EPI_ISL_2408352, EPI_ISL_2408358, EPI_ISL_2408359, EPI_ISL_2408360, EPI_ISL_2408364, EPI_ISL_2408368, EPI_ISL_2408383 | see above                                                                                                                                                                                                      | Ministry of Public Health / Hamad Medical Corporation<br>Biomedical Research Center (BRC), Qatar University / Qatar Genome Project (QGP)                                                                       | Asmaa A. Al-Thani. MOPH and HMC: Abdullatif Al-Khal; Asmaa A. Al-Thani. MOPH and HMC: Abdullatif Al-Khal; BRC: Fatiha M. Benslimane; Chadi Saad; Dana Al-Batesh; Dina Elgakhlab QGP: Fatima H. Al-Kuwari; Dina Elgakhlab QGP: Fatima H. Al-Kuwari; Einas A. E. Al-Kuwari; Hadi M. Yassine; Hamad E. Al-Romaihi; Hamda Alromaihi; Heba A. Al-Khatib; Mashaal A. Al-Bader; Mohammed Al-Thani; Muna A. S. Al-Maslamani; Oal Al-Jamal; Peter V. Coyle; Reham A. El-Kahlout. QBB: Tasneem Al-Hamad; Roberto Bertolini; Salih Al-Marri |
| EPI_ISL_1714224, EPI_ISL_1714261, EPI_ISL_1714469, EPI_ISL_1714569                                                                                                                                                                                                                                                                                                                                                                                                                                                                                                                               | Ministry of Public Health / Hamad Medical Corporation                                                                                                                                                          | Weill Cornell Medical College - Qatar (WCM-Q), Genomics Core Laboratory / Qatar Genome Project (QGP)                                                                                                           | Chadi Saad MOPH and HMC: Abdullatif Al-Khal; Dina Elgakhlab; Einas A. E. Al-Kuwari; Hamad E. Al-Romaihi; Hamda Alromaihi; Joel A Malek. QGP: Fatima H. Al-Kuwari; Laith Abu-Raddad; Mashaal A. Al-Bader; Meryem Bensaad; Mohammed Al-Thani; Muna A. S. Al-Maslamani; Peter V. Coyle; Reham A. El-Kahlout. QBB: Tasneem Al-Hamad; Roberto Bertolini; Salih Al-Marri; Shameem Younusunjiu; WCMQ: Ayeda A. Ahmed; Yasmin Mohamoud                                                                                                   |
| EPI_ISL_1857556, EPI_ISL_1857569, EPI_ISL_2232545, EPI_ISL_2536900, EPI_ISL_2598148                                                                                                                                                                                                                                                                                                                                                                                                                                                                                                              | Minnesota Department of Health, Public Health Laboratory                                                                                                                                                       | Minnesota Department of Health, Public Health Laboratory                                                                                                                                                       | Alexandra Lorentz; Jacob Garfin; Matt Plumb; and Xiong Wang                                                                                                                                                                                                                                                                                                                                                                                                                                                                      |
| EPI_ISL_2614742                                                                                                                                                                                                                                                                                                                                                                                                                                                                                                                                                                                  | Miri Hospital                                                                                                                                                                                                  | Institute for Medical Research, Infectious Disease Research Centre, National Institutes of Health, Ministry of Health Malaysia                                                                                 | Azizan MA; Kamel K; Mohd Zawawi Z; Ramly N; Robert F; Suppiah J; Thayan R                                                                                                                                                                                                                                                                                                                                                                                                                                                        |
| EPI_ISL_2035597, EPI_ISL_2753757, EPI_ISL_2753842                                                                                                                                                                                                                                                                                                                                                                                                                                                                                                                                                | Missouri State Public Health Laboratory                                                                                                                                                                        | Missouri State Public Health Laboratory                                                                                                                                                                        | Ashley New; Joshua Barry; Matthew Sinn                                                                                                                                                                                                                                                                                                                                                                                                                                                                                           |
| EPI_ISL_1312791                                                                                                                                                                                                                                                                                                                                                                                                                                                                                                                                                                                  | Molecular & Genomic Pathology Laboratory, Thomas Jefferson University Hospital                                                                                                                                 | Molecular & Genomic Pathology Laboratory, Thomas Jefferson University Hospital                                                                                                                                 | Nitika Badjatia; Run Jin; Zi-xuan Wang                                                                                                                                                                                                                                                                                                                                                                                                                                                                                           |
| EPI_ISL_2095423, EPI_ISL_2095702                                                                                                                                                                                                                                                                                                                                                                                                                                                                                                                                                                 | Molecular Diagnostics Mater Dei Hospital Pathology Department Malta                                                                                                                                            | Molecular Diagnostics Mater Dei Hospital Pathology Department Malta                                                                                                                                            | C Cilia; G Zahra; L Grech; R Borg                                                                                                                                                                                                                                                                                                                                                                                                                                                                                                |
| EPI_ISL_2006673, EPI_ISL_2101112, EPI_ISL_2101201, EPI_ISL_2101748, EPI_ISL_2102066, EPI_ISL_2105878, EPI_ISL_2105879, EPI_ISL_2105942, EPI_ISL_2105959, EPI_ISL_2107823, EPI_ISL_2107982, EPI_ISL_2113866                                                                                                                                                                                                                                                                                                                                                                                       | see above                                                                                                                                                                                                      | Molecular Diagnostics Pathology Department Mater Dei Hospital Malta                                                                                                                                            | C Cilia; G Zahra; L Grech; R Borg                                                                                                                                                                                                                                                                                                                                                                                                                                                                                                |
| EPI_ISL_482716                                                                                                                                                                                                                                                                                                                                                                                                                                                                                                                                                                                   | Molecular Diagnostics Services (MDS)                                                                                                                                                                           | KRISP, KZN Research Innovation and Sequencing Platform                                                                                                                                                         | Chimukangara B; Giandhari J; Khan S; Lessells R; Mdlalose K; Pillay S; Tegally H; Wilkinson E; York D; de Oliveira T                                                                                                                                                                                                                                                                                                                                                                                                             |
| EPI_ISL_2031957                                                                                                                                                                                                                                                                                                                                                                                                                                                                                                                                                                                  | Molecular diagnostic laboratory of Federal Budget Institution of Science "Central Research Institute of Epidemiology" of The Federal Service on Customers' Rights Protection and Human Well-being Surveillance | Group of Genomics and Postgenomic Technologies of Central Research Institute of Epidemiology                                                                                                                   | Akimkin V.G.; Kaptelova V.V.; Kondrasheva L.Y.; Korneenko E.V.; Nadtoka M.I.; Saenko S.S.; Samojlov A.E.; Shipulina O.Y.; Sinicyn S.O.; Smirnova Y.S.; Speranskaya A.S.; Tivanova E.V.                                                                                                                                                                                                                                                                                                                                           |
| EPI_ISL_2626269, EPI_ISL_2626279, EPI_ISL_2626319, EPI_ISL_2626324, EPI_ISL_2626341, EPI_ISL_2626392, EPI_ISL_2626429                                                                                                                                                                                                                                                                                                                                                                                                                                                                            | see above                                                                                                                                                                                                      | Molecular diagnostic laboratory of Federal Budget Institution of Science "Central Research Institute of Epidemiology" of The Federal Service on Customers' Rights Protection and Human Well-being Surveillance | Akimkin V.G.; Kaptelova V.V.; Kondrasheva L.Y.; Korneenko E.V.; Nadtoka M.I.; Saenko S.S.; Samoilov A.E.; Sinitsyn S.O.; Smirnova Y.S.; Speranskaya A.S.; Tivanova E.V.                                                                                                                                                                                                                                                                                                                                                          |
| EPI_ISL_2350979                                                                                                                                                                                                                                                                                                                                                                                                                                                                                                                                                                                  | Mongkutwattana General Hospital                                                                                                                                                                                | Division of Genomic Medicine and Innovation support,Department of Medical Sciences, Ministry of Public Health, Thailand                                                                                        | Archawin Rojanawiwat; Jirapha Pakdee; Nattakul Bunneang; Nuanjun Wichukchinda; Penpitcha Thawong; Pilailuk Akkapaiboon Okada; Pundharika Piboonsiri; Surakameth Mahasirimongkol; Waritta Sawaengdee                                                                                                                                                                                                                                                                                                                              |
| EPI_ISL_2023368, EPI_ISL_2604223, EPI_ISL_2604228                                                                                                                                                                                                                                                                                                                                                                                                                                                                                                                                                | Montana Public Health Laboratory                                                                                                                                                                               | Montana Public Health Laboratory                                                                                                                                                                               | Carrie Biskupiak; Deborah Gibson; Joy Ritter; Michael Dills; Michelle Mozer                                                                                                                                                                                                                                                                                                                                                                                                                                                      |
| EPI_ISL_1017573                                                                                                                                                                                                                                                                                                                                                                                                                                                                                                                                                                                  | Murphy Medical Associates                                                                                                                                                                                      | Grubaugh Lab - Yale School of Public Health                                                                                                                                                                    | Annie Watkins; Caleb Neal; Chantal Vogels; Joseph Fauver; Mallery Breban; Mary Petrone; Nathan Grubaugh; Steven Murphy; Tara Alpert                                                                                                                                                                                                                                                                                                                                                                                              |
| EPI_ISL_1591094, EPI_ISL_1591097                                                                                                                                                                                                                                                                                                                                                                                                                                                                                                                                                                 | NAMRU-6                                                                                                                                                                                                        | Pathogen Discovery, Respiratory Viruses Branch, Division of Viral Diseases, Centers for Disease Control and Prevention                                                                                         | Adam Retchless; Anna Kelleher; Anna Montmayer; Anna Uehara; Brian Lynch; Clinton R. Paden; Halbin Wang; Han Jia Justin Ng; Jing Zhang; Justin Lee; Krista Queen; Mark Burroughs; Peter Cook; Rachel Marine; Suxiang Tong; Yan Li; Ying Tao                                                                                                                                                                                                                                                                                       |
| EPI_ISL_1678360                                                                                                                                                                                                                                                                                                                                                                                                                                                                                                                                                                                  | NC State Laboratory of Public Health                                                                                                                                                                           | Centers for Disease Control and Prevention Division of Viral Diseases, Pathogen Discovery                                                                                                                      | Alison Laufer Halpin; Ben L. Rambo-Martin; Clinton R. Paden; Dakota Howard; Darlene Wagner; Dave Wentworth; Dhvani Batra; Jasmine Padilla; Justin Lee; Katie Dillon; Krista Queen; Kristen Knipe; Kristine Lacek; Mark Burroughs; Matthew Schmerer; Mili Sheth; Peter Cook; Sam Shepard; Sarah Nobles; Shoshona Le; Suxiang Tong; Vivien Dugan; Yvette Unoarumhi                                                                                                                                                                 |
| EPI_ISL_1036244                                                                                                                                                                                                                                                                                                                                                                                                                                                                                                                                                                                  | NCSLPH                                                                                                                                                                                                         | NCSLPH                                                                                                                                                                                                         | Chase K; Glover W; Greene S; Miller MC                                                                                                                                                                                                                                                                                                                                                                                                                                                                                           |
| EPI_ISL_1937844                                                                                                                                                                                                                                                                                                                                                                                                                                                                                                                                                                                  | NH Dept. of Health and Human Services Public Health Labs                                                                                                                                                       | Centers for Disease Control and Prevention Division of Viral Diseases, Pathogen Discovery                                                                                                                      | Alison Laufer Halpin; Ben L. Rambo-Martin; Clinton R. Paden; Dakota Howard; Darlene Wagner; Dave Wentworth; Dhvani Batra; Jasmine Padilla; Justin Lee; Katie Dillon; Krista Queen; Kristen Knipe; Kristine Lacek; Mark Burroughs; Matthew Schmerer; Mili Sheth; Peter Cook; Sam Shepard; Sarah Nobles; Shoshona Le; Suxiang Tong; Vivien Dugan; Yvette Unoarumhi                                                                                                                                                                 |
| EPI_ISL_751712                                                                                                                                                                                                                                                                                                                                                                                                                                                                                                                                                                                   | NH Dept. of Health and Human Services Public Health Labs                                                                                                                                                       | Genomics and Discovery, Respiratory Viruses Branch, Division of Viral Diseases, Centers for Disease Control and Prevention                                                                                     | Anna Montmayer; Anna Uehara; Clinton R. Paden; Halbin Wang; Jing Zhang; Justin Lee; Krista Queen; Mili Sheth; Peter W. Cook; Rachel Marine; Suxiang Tong; Yan Li; Ying Tao                                                                                                                                                                                                                                                                                                                                                       |
| EPI_ISL_2710253, EPI_ISL_2710259, EPI_ISL_2770461                                                                                                                                                                                                                                                                                                                                                                                                                                                                                                                                                | NHLS Charlotte Maxeke Johannesburg Academic Hospital and the University of the Witwatersrand                                                                                                                   | KRISP, KZN Research Innovation and Sequencing Platform                                                                                                                                                         | Bulelani Manene; Florette Treurnicht; Giandhari Jennifer; Kathleen Subramoney; Naidoo Yeshee; Pillay Sureshnee; San James; Tegally Houriiyah; Tshabula Derek; Wilkinson Eduan; Yajna Ramphal; de Oliveira Tulio                                                                                                                                                                                                                                                                                                                  |
| EPI_ISL_912456                                                                                                                                                                                                                                                                                                                                                                                                                                                                                                                                                                                   | NHLS Universitas Academic                                                                                                                                                                                      | UFS Virology                                                                                                                                                                                                   | D Goedhals; MM Nyaga; MT Mogotsi; P Nthiga; PA Bester; T de Oliveira                                                                                                                                                                                                                                                                                                                                                                                                                                                             |
| EPI_ISL_2802196                                                                                                                                                                                                                                                                                                                                                                                                                                                                                                                                                                                  | NHLS/UCT                                                                                                                                                                                                       | NHLS/UCT                                                                                                                                                                                                       | Arash Iranzadeh; Bruna Galvao; Carolyn Williamson; Deelan Doolabh; Diana Hardie; Gert Marais; Innocent Mudau; Lynn Tyers; Marvin Hsiao; Stephen Korsman                                                                                                                                                                                                                                                                                                                                                                          |
| EPI_ISL_2494449                                                                                                                                                                                                                                                                                                                                                                                                                                                                                                                                                                                  | NHLS_VIRO                                                                                                                                                                                                      | KRISP, Kzn Research Innovation and Sequencing Platform                                                                                                                                                         | Baillie Vicky; Giandhari Jennifer; Madhi Shabir; Naidoo Yeshee; San James; Tegally Houriiyah; Tshabula Derek; Wilkinson Eduan; de Oliveira Tulio; du Plessis Jeanine                                                                                                                                                                                                                                                                                                                                                             |
| EPI_ISL_1060793                                                                                                                                                                                                                                                                                                                                                                                                                                                                                                                                                                                  | NJ Rapid Response Teams                                                                                                                                                                                        | New Jersey Public Health Environmental Laboratories (NJ_PHEL)                                                                                                                                                  | Byeong Jeong; Dana Woell; Lindsey Bodnar; Shiv Verma                                                                                                                                                                                                                                                                                                                                                                                                                                                                             |
| EPI_ISL_1960012, EPI_ISL_1969044, EPI_ISL_2185596, EPI_ISL_2281845, EPI_ISL_2282038, EPI_ISL_2282040, EPI_ISL_2376100, EPI_ISL_2727592                                                                                                                                                                                                                                                                                                                                                                                                                                                           | see above                                                                                                                                                                                                      | NIDOH, Public Health and Environmental Laboratories<br>NJ_PHEL                                                                                                                                                 | Allison Roder; Byeong Jeong; Dana Woell; Jacquelyn Deverell; Lindsey Bodnar; Matthew Scarnati; Ryan Pachucki; Shiv K. Verma                                                                                                                                                                                                                                                                                                                                                                                                      |
| EPI_ISL_2018180                                                                                                                                                                                                                                                                                                                                                                                                                                                                                                                                                                                  | NM Dept. Health, Scientific Laboratory Division                                                                                                                                                                | Centers for Disease Control and Prevention Division of Viral Diseases, Pathogen Discovery                                                                                                                      | Alison Laufer Halpin; Ben L. Rambo-Martin; Clinton R. Paden; Dakota Howard; Darlene Wagner; Dave Wentworth; Dhvani Batra; Jasmine Padilla; Justin Lee; Katie Dillon; Krista Queen; Kristen Knipe; Kristine Lacek; Mark Burroughs; Matthew Schmerer; Mili Sheth; Peter Cook; Sam Shepard; Sarah Nobles; Shoshona Le; Suxiang Tong; Vivien Dugan; Yvette Unoarumhi                                                                                                                                                                 |
| EPI_ISL_1482556, EPI_ISL_1671604                                                                                                                                                                                                                                                                                                                                                                                                                                                                                                                                                                 | NORTHWELL HEALTH LABORATORIES                                                                                                                                                                                  | Wadsworth Center, New York State Department of Health                                                                                                                                                          | Alexis Russell; Catharine Prussing; Daryl M. Lamson; Erasmus Schneider; Erica Lasek-Nesselquist; John Kelly; Jonathan Plitnick; Kirsten St. George; Matthew Shudt; Melissa A Leisner; Navjot Singh                                                                                                                                                                                                                                                                                                                               |
| EPI_ISL_632312                                                                                                                                                                                                                                                                                                                                                                                                                                                                                                                                                                                   | NU-sjukvården                                                                                                                                                                                                  | Clinical microbiology, Sahlgrenska University Hospital                                                                                                                                                         | Hedvig Engström Jakobsson; Johan Ringlander; Josefin Olausson; Magnus Lindh                                                                                                                                                                                                                                                                                                                                                                                                                                                      |
| EPI_ISL_1678079, EPI_ISL_1823954                                                                                                                                                                                                                                                                                                                                                                                                                                                                                                                                                                 | NYC Department of Health and Mental Hygiene                                                                                                                                                                    | Centers for Disease Control and Prevention Division of Viral Diseases, Pathogen Discovery                                                                                                                      | Alison Laufer Halpin; Ben L. Rambo-Martin; Clinton R. Paden; Dakota Howard; Darlene Wagner; Dave Wentworth; Dhvani Batra; Jasmine Padilla; Justin Lee; Katie Dillon; Krista Queen; Kristen Knipe; Kristine Lacek; Mark Burroughs; Matthew Schmerer; Mili Sheth; Peter Cook; Sam Shepard; Sarah Nobles; Shoshona Le; Suxiang Tong; Vivien Dugan; Yvette Unoarumhi                                                                                                                                                                 |
| EPI_ISL_1398304                                                                                                                                                                                                                                                                                                                                                                                                                                                                                                                                                                                  | NYC Pandemic Response Lab                                                                                                                                                                                      | Wadsworth Center, New York State Department of Health                                                                                                                                                          | Alexis Russel; Daryl M. Lamson; Erasmus Schneider; Erica Lasek-Nesselquist; John Kelly; Jonathan Plitnick; Kirsten St. George; Matthew Shudt; Melissa A Leisner; Navjot Singh                                                                                                                                                                                                                                                                                                                                                    |
| EPI_ISL_1790019, EPI_ISL_1790023, EPI_ISL_1922839                                                                                                                                                                                                                                                                                                                                                                                                                                                                                                                                                | NYU Langone Health                                                                                                                                                                                             | Departments of Pathology and Medicine, New York University School of Medicine                                                                                                                                  | Adriana Heguy; Christian Marier; Dacia Dimartino; Emily Guzman; Gael Westby; Guiqing Wang; Paolo Cotzia; Paul Zappile; Peter Meyn; Sitharam Ramaswami; Yutong Zhang                                                                                                                                                                                                                                                                                                                                                              |
| EPI_ISL_625581                                                                                                                                                                                                                                                                                                                                                                                                                                                                                                                                                                                   | NaN                                                                                                                                                                                                            | Chan-Zuckerberg Biohub                                                                                                                                                                                         | CZB Cliahub Consortium                                                                                                                                                                                                                                                                                                                                                                                                                                                                                                           |
| EPI_ISL_1298480                                                                                                                                                                                                                                                                                                                                                                                                                                                                                                                                                                                  | Nadvirna CRH                                                                                                                                                                                                   | The Institute of Molecular Biology and Genetics of NASU                                                                                                                                                        | M.Tukalo et al.                                                                                                                                                                                                                                                                                                                                                                                                                                                                                                                  |
| EPI_ISL_1805651, EPI_ISL_1805717, EPI_ISL_1805789, EPI_ISL_1805933, EPI_ISL_1805957, EPI_ISL_1805958, EPI_ISL_1805960, EPI_ISL_1805961, EPI_ISL_1805962                                                                                                                                                                                                                                                                                                                                                                                                                                          | see above                                                                                                                                                                                                      | National Center for Communicable Diseases (NCCD) National Influenza Center                                                                                                                                     | Ankhhayar S; Battur L; Bayasgalan N; Darmaa B; Hideka M; Khishigmunkh Ch; Mina N; Naranzul Ts; Nymadawa P; Seichiro F; Shinji W; Tsgolzmaa G                                                                                                                                                                                                                                                                                                                                                                                     |
| EPI_ISL_1805697                                                                                                                                                                                                                                                                                                                                                                                                                                                                                                                                                                                  | National Center for Communicable Diseases (NCCD) National Influenza Center                                                                                                                                     | National Centre for Disease Control (NCDC) National Influenza Center                                                                                                                                           | Ankhhayar S; Battur L; Bayasgalan N; Darmaa B; Hideka M; Khishigmunkh Ch; Mina N; Naranzul Ts; Nymadawa P; Seichiro F; Shinji W; Tsgolzmaa G                                                                                                                                                                                                                                                                                                                                                                                     |
| EPI_ISL_1407199, EPI_ISL_1407245, EPI_ISL_1407253, EPI_ISL_2494937, EPI_ISL_2609599,                                                                                                                                                                                                                                                                                                                                                                                                                                                                                                             | National HIV Reference Laboratory, Ministry of Health, Public Health Institute of Malawi                                                                                                                       | KRISP, KZN Research Innovation and Sequencing Platform                                                                                                                                                         | Auld A; Chilima B; Chiwaula M; Emmanuel SJ; Giandhari J; Kaba M; Kampira E; Kasambara W; Kim L; Lessells R; Maida A; Mvula B; Mwangomba W; Naidoo Y; Panja L; Pillay S; Tegally H; Wadonda N; Wilkinson E; de Oliveira T                                                                                                                                                                                                                                                                                                         |

|                                                                                                                                                                                                                                                                                                                                                                                                                                                                                                                                                                                                                                                                                                                                                                                                                                                                                                                                                                                                                                                                                                                                                                                                                                                                                                                                                                                                                                                                                                                                                                                                                                                                                                                                                                                                                                                                                                                                                                                                                                                                                                                                                                                                                                                                                                                                                                                                                                                                                                                                                                                          |                                                                                                                                                                    |                                                                                                                                                                                                                     |                                                                                                                                                                                                                                                                                                                                                                                                                                                              |
|------------------------------------------------------------------------------------------------------------------------------------------------------------------------------------------------------------------------------------------------------------------------------------------------------------------------------------------------------------------------------------------------------------------------------------------------------------------------------------------------------------------------------------------------------------------------------------------------------------------------------------------------------------------------------------------------------------------------------------------------------------------------------------------------------------------------------------------------------------------------------------------------------------------------------------------------------------------------------------------------------------------------------------------------------------------------------------------------------------------------------------------------------------------------------------------------------------------------------------------------------------------------------------------------------------------------------------------------------------------------------------------------------------------------------------------------------------------------------------------------------------------------------------------------------------------------------------------------------------------------------------------------------------------------------------------------------------------------------------------------------------------------------------------------------------------------------------------------------------------------------------------------------------------------------------------------------------------------------------------------------------------------------------------------------------------------------------------------------------------------------------------------------------------------------------------------------------------------------------------------------------------------------------------------------------------------------------------------------------------------------------------------------------------------------------------------------------------------------------------------------------------------------------------------------------------------------------------|--------------------------------------------------------------------------------------------------------------------------------------------------------------------|---------------------------------------------------------------------------------------------------------------------------------------------------------------------------------------------------------------------|--------------------------------------------------------------------------------------------------------------------------------------------------------------------------------------------------------------------------------------------------------------------------------------------------------------------------------------------------------------------------------------------------------------------------------------------------------------|
| EPI_ISL_2609601<br>EPI_ISL_2494886,<br>EPI_ISL_2495053                                                                                                                                                                                                                                                                                                                                                                                                                                                                                                                                                                                                                                                                                                                                                                                                                                                                                                                                                                                                                                                                                                                                                                                                                                                                                                                                                                                                                                                                                                                                                                                                                                                                                                                                                                                                                                                                                                                                                                                                                                                                                                                                                                                                                                                                                                                                                                                                                                                                                                                                   | National Health Laboratory Service, South Africa                                                                                                                   | KRISP, KZN Research Innovation and Sequencing Platform                                                                                                                                                              | Emmanuel SJ; Giandhari J; Khan S; Lessells R; Mdlalose K; Naidoo Y; Pillay S; Ramphal U; Tegally H; Wilkinson E; York D; de Oliveira T                                                                                                                                                                                                                                                                                                                       |
| EPI_ISL_1371929,<br>EPI_ISL_2617216<br>EPI_ISL_456608                                                                                                                                                                                                                                                                                                                                                                                                                                                                                                                                                                                                                                                                                                                                                                                                                                                                                                                                                                                                                                                                                                                                                                                                                                                                                                                                                                                                                                                                                                                                                                                                                                                                                                                                                                                                                                                                                                                                                                                                                                                                                                                                                                                                                                                                                                                                                                                                                                                                                                                                    | National Health Laboratory Service, South Africa<br><br>National Health Laboratory, Timor-Leste                                                                    | KRISP, Kzn Research Innovation and Sequencing Platform<br><br>Microbiological Diagnostic Unit Public Health Laboratory, The Peter Doherty Institute for Infection and Immunity                                      | Emmanuel SJ; Giandhari J; Giandhari Jennifer; Khan S; Lessells R; Maslo C; Mdlalose K; Naidoo Yeshnee; Pillay S; Pillay Sureshnee; San James; Sitharam L; Tegally H; Tegally Houriyah; Tshabula Derek; Wilkinson E; Wilkinson Eduan; Yajna Ramphal; York D; de Oliveira T; de Oliveira Tulio                                                                                                                                                                 |
| EPI_ISL_2455483, EPI_ISL_2455493, EPI_ISL_2455494, EPI_ISL_2455495, EPI_ISL_2455496, EPI_ISL_2455497, EPI_ISL_2455506, EPI_ISL_2455895, EPI_ISL_2457173                                                                                                                                                                                                                                                                                                                                                                                                                                                                                                                                                                                                                                                                                                                                                                                                                                                                                                                                                                                                                                                                                                                                                                                                                                                                                                                                                                                                                                                                                                                                                                                                                                                                                                                                                                                                                                                                                                                                                                                                                                                                                                                                                                                                                                                                                                                                                                                                                                  | see above                                                                                                                                                          | National Hospital for Tropical Diseases                                                                                                                                                                             | H.Rogier van Doorn on behalf of the OUCRU COVID-19 research group; Le Van Duyet; Nguyen Thi Hong Thuong; Nguyen Thi Kim Chi; Nguyen Thi Tam; Nguyen Thu Trang; Pham Ngoc Thach; Phan Manh Cuong; Thomas Kesteman; Van Dinh Trang                                                                                                                                                                                                                             |
| EPI_ISL_416427,<br>EPI_ISL_416429<br>EPI_ISL_410301                                                                                                                                                                                                                                                                                                                                                                                                                                                                                                                                                                                                                                                                                                                                                                                                                                                                                                                                                                                                                                                                                                                                                                                                                                                                                                                                                                                                                                                                                                                                                                                                                                                                                                                                                                                                                                                                                                                                                                                                                                                                                                                                                                                                                                                                                                                                                                                                                                                                                                                                      | National Influenza Center, National Institute of Hygiene and Epidemiology (NIHE)<br>National Influenza Centre, National Public Health Laboratory, Kathmandu, Nepal | National Influenza Center, National Institute of Hygiene and Epidemiology (NIHE)<br>The University of Hong Kong                                                                                                     | Dang Duc Anh; Futoshi Hasebe; Hoang Vu Mai Phuong; Kouichi Morita; Le Quynh Mai; Le Thi Thanh; Meng Ling Moi; Nguyen Le Khanh Hang; Nguyen Phuong Anh; Nguyen Vu Son; Pham Hong Quynh Anh; Pham Thi Hien; Taichiro Takemura; Takeshi Nabeshima; Tran Thu Huong; Ung Thi Hong Trang; Vuong Duc Cuong                                                                                                                                                          |
| EPI_ISL_402125                                                                                                                                                                                                                                                                                                                                                                                                                                                                                                                                                                                                                                                                                                                                                                                                                                                                                                                                                                                                                                                                                                                                                                                                                                                                                                                                                                                                                                                                                                                                                                                                                                                                                                                                                                                                                                                                                                                                                                                                                                                                                                                                                                                                                                                                                                                                                                                                                                                                                                                                                                           | National Institute for Communicable Disease Control and Prevention (ICDC) Chinese Center for Disease Control and Prevention (China CDC)                            | National Institute for Communicable Disease Control and Prevention (ICDC) Chinese Center for Disease Control and Prevention (China CDC)                                                                             | Chen; Dai; F.-H.; Hu, Y.; J.-H.; J.-J.; J.-L. and Zhu; Liu, Y.; Pei; Q.-M.; She; Song; T.-Y.; Tao; Tian; Wang; Wang, W.; Wu, F.; Xu, L.; Y.-L.; Y.-M.; Y.-Y.; Y.-Z.; Yu, B.; Z.-G.; Z.-W.; Zhang; Zhao, S.; Zheng                                                                                                                                                                                                                                            |
| EPI_ISL_490257,<br>EPI_ISL_2444003<br>EPI_ISL_591278,<br>EPI_ISL_2170893                                                                                                                                                                                                                                                                                                                                                                                                                                                                                                                                                                                                                                                                                                                                                                                                                                                                                                                                                                                                                                                                                                                                                                                                                                                                                                                                                                                                                                                                                                                                                                                                                                                                                                                                                                                                                                                                                                                                                                                                                                                                                                                                                                                                                                                                                                                                                                                                                                                                                                                 | National Institute for Communicable Diseases of the National Health Laboratory Service<br>National Institute for Viral Disease Control and Prevention, China CDC   | National Institute for Communicable Diseases of the National Health Laboratory Service<br>National Institute for Viral Disease Control and Prevention, China CDC                                                    | Allam M; Amoako DG; Bhiman JN; Ismail A; Khumalo Z; Kwenda S; Mahlangu B; Mnyameni F; Mohale T; Mthshali P; Ntuli N; Scheepers C; Subramoney K                                                                                                                                                                                                                                                                                                               |
| EPI_ISL_2308255                                                                                                                                                                                                                                                                                                                                                                                                                                                                                                                                                                                                                                                                                                                                                                                                                                                                                                                                                                                                                                                                                                                                                                                                                                                                                                                                                                                                                                                                                                                                                                                                                                                                                                                                                                                                                                                                                                                                                                                                                                                                                                                                                                                                                                                                                                                                                                                                                                                                                                                                                                          | National Institute of Health (NIH) - Federal Government of Somalia                                                                                                 | African Centre of Excellence for Genomics of Infectious Diseases (ACEGID), Redeemer's University                                                                                                                    | A.T.; Abechi; Ajogbasile; Akano; C.A.; C.T.; Eromon; F.V.; Folarin, O.; Happi; I.B.; J.N.; J.U.; K.O.; Kayode; Nosamiefan, I.; Oguzie; Olawoye; Oluniji; P.E.; P.S.; T.J.; Ugwu; Uwanibe                                                                                                                                                                                                                                                                     |
| EPI_ISL_875346, EPI_ISL_1116430, EPI_ISL_1116435, EPI_ISL_1116444, EPI_ISL_1116455, EPI_ISL_1186023, EPI_ISL_1186116, EPI_ISL_1279948, EPI_ISL_1279949, EPI_ISL_2099853, EPI_ISL_2190106, EPI_ISL_2566459, EPI_ISL_2566460                                                                                                                                                                                                                                                                                                                                                                                                                                                                                                                                                                                                                                                                                                                                                                                                                                                                                                                                                                                                                                                                                                                                                                                                                                                                                                                                                                                                                                                                                                                                                                                                                                                                                                                                                                                                                                                                                                                                                                                                                                                                                                                                                                                                                                                                                                                                                               | see above                                                                                                                                                          | National Institute of Infectious Diseases-Prof. Dr. Matel Bals Molecular Diagnostics Laboratory                                                                                                                     | Andreea Tudor; Corina Casangiu; Dan Otelea; Leontina Banica; Marius Surleac; Ovidiu Vlaicu; Petre Milu; Robert Hohan; Simona Paraschiv                                                                                                                                                                                                                                                                                                                       |
| EPI_ISL_1091415                                                                                                                                                                                                                                                                                                                                                                                                                                                                                                                                                                                                                                                                                                                                                                                                                                                                                                                                                                                                                                                                                                                                                                                                                                                                                                                                                                                                                                                                                                                                                                                                                                                                                                                                                                                                                                                                                                                                                                                                                                                                                                                                                                                                                                                                                                                                                                                                                                                                                                                                                                          | National Institute of Public Health - National Institute of Hygiene                                                                                                | 1. National Institute of Public Health - National Institute of Hygiene; 2. Eurofins Genomics Europe Sequencing GmbH                                                                                                 | ECDC COVID-19 WGS support team; Eurofins Genomics Europe Sequencing Team; Gierczyński Rafał; Sadkowska-Todys Małgorzata; Wolkowicz Tomasz; Zacharczuk Katarzyna                                                                                                                                                                                                                                                                                              |
| EPI_ISL_1826917                                                                                                                                                                                                                                                                                                                                                                                                                                                                                                                                                                                                                                                                                                                                                                                                                                                                                                                                                                                                                                                                                                                                                                                                                                                                                                                                                                                                                                                                                                                                                                                                                                                                                                                                                                                                                                                                                                                                                                                                                                                                                                                                                                                                                                                                                                                                                                                                                                                                                                                                                                          | National Institute of Public Health - National Institute of Hygiene                                                                                                | 1. Tricity SARS-CoV-2 sequencing consortium: University of Gdańsk, Medical University of Gdańsk, Vaxivian Ltd., Invicta Ltd. 2. National Institute of Public Health - National Institute of Hygiene, Warsaw, Poland | Celina Cybulska; Karolina Gackowska; Katarzyna Groth; Katarzyna Zacharczuk; Krystyna Bienkowska Szewczyk; Lukasz Rabalski; Maciej Grzybek; Maciej Kosinski; Magdalena Nowakowska; Małgorzata Sadkowska-Todys; Tomasz Wolkowicz                                                                                                                                                                                                                               |
| EPI_ISL_1260750                                                                                                                                                                                                                                                                                                                                                                                                                                                                                                                                                                                                                                                                                                                                                                                                                                                                                                                                                                                                                                                                                                                                                                                                                                                                                                                                                                                                                                                                                                                                                                                                                                                                                                                                                                                                                                                                                                                                                                                                                                                                                                                                                                                                                                                                                                                                                                                                                                                                                                                                                                          | National Laboratory for Health, Environment and Food                                                                                                               | Department for Public Health Microbiology Ljubljana, National Laboratory for Health, Environment and Food                                                                                                           | Jose Goncalves; Katarina Prosenc Trilar; Marija Trkov; Martin Bosilj; Metka Paragi; Tom Koritnik; Verica MIOC                                                                                                                                                                                                                                                                                                                                                |
| EPI_ISL_2273628                                                                                                                                                                                                                                                                                                                                                                                                                                                                                                                                                                                                                                                                                                                                                                                                                                                                                                                                                                                                                                                                                                                                                                                                                                                                                                                                                                                                                                                                                                                                                                                                                                                                                                                                                                                                                                                                                                                                                                                                                                                                                                                                                                                                                                                                                                                                                                                                                                                                                                                                                                          | National Laboratory for Health, Environment and Food, OMM, Celje                                                                                                   | NLZOH (National Laboratory for Health, Environment and Food) / CISLD (Clinical Institute of Special Laboratory Diagnostics), University Children's Hospital, University Medical Center Ljubljana                    | Aleksander Kocuvan; Aleksander Mahnic; Alenka Štorman; Ana Grom; Barbara Jenko Bizjan; Daša Kavka / Jernej Kovač; Kaja Tominc; Katarina Kozmos; Maja Rupnik; Marko Pokorn; Maruša Debeljak; Mateja Borinc; Maša Jarčič; Nika Gobec; Robert Šket; Sandra Janežic; Tadej Battelino; Tine Tesovnik; Tjasa Žohar Čretnik                                                                                                                                         |
| EPI_ISL_1111965, EPI_ISL_1112006, EPI_ISL_1112093, EPI_ISL_1266335, EPI_ISL_1266586                                                                                                                                                                                                                                                                                                                                                                                                                                                                                                                                                                                                                                                                                                                                                                                                                                                                                                                                                                                                                                                                                                                                                                                                                                                                                                                                                                                                                                                                                                                                                                                                                                                                                                                                                                                                                                                                                                                                                                                                                                                                                                                                                                                                                                                                                                                                                                                                                                                                                                      | National Laboratory for Health, Environment and Food, OMM, Koper                                                                                                   | CISLD (Clinical Institute of Special Laboratory Diagnostics), University Children's Hospital, University Medical Center Ljubljana                                                                                   | Ana Grom; Barbara Jenko Bizjan; Jernej Kovač; Katarina Kozmos; Marko Pokorn; Maruša Debeljak; Robert Šket; Tadej Battelino; Tine Tesovnik                                                                                                                                                                                                                                                                                                                    |
| EPI_ISL_1625399, EPI_ISL_2463617                                                                                                                                                                                                                                                                                                                                                                                                                                                                                                                                                                                                                                                                                                                                                                                                                                                                                                                                                                                                                                                                                                                                                                                                                                                                                                                                                                                                                                                                                                                                                                                                                                                                                                                                                                                                                                                                                                                                                                                                                                                                                                                                                                                                                                                                                                                                                                                                                                                                                                                                                         | National Laboratory for Health, Environment and Food, OMM, Koper                                                                                                   | NLZOH (National Laboratory for Health, Environment and Food) / CISLD (Clinical Institute of Special Laboratory Diagnostics), University Children's Hospital, University Medical Center Ljubljana                    | Aleksander Kocuvan; Aleksander Mahnic; Alenka Štorman; Ana Grom; Barbara Jenko Bizjan; Gašper Strugar; Kaja Tominc; Katarina Kozmos; Maja Rupnik; Marko Pokorn; Maruša Debeljak; Maša Jarčič; Mitja Rak / Jernej Kovač; Nika Gobec; Robert Šket; Sandra Janežic; Tadej Battelino; Tina Cvetković; Tine Tesovnik; Tjasa Žohar Čretnik                                                                                                                         |
| EPI_ISL_2463375                                                                                                                                                                                                                                                                                                                                                                                                                                                                                                                                                                                                                                                                                                                                                                                                                                                                                                                                                                                                                                                                                                                                                                                                                                                                                                                                                                                                                                                                                                                                                                                                                                                                                                                                                                                                                                                                                                                                                                                                                                                                                                                                                                                                                                                                                                                                                                                                                                                                                                                                                                          | National Laboratory for Health, Environment and Food, OMM, Maribor                                                                                                 | NLZOH (National Laboratory for Health, Environment and Food) / CISLD (Clinical Institute of Special Laboratory Diagnostics), University Children's Hospital, University Medical Center Ljubljana                    | Aleksander Kocuvan; Aleksander Mahnic; Alenka Štorman; Ana Grom; Andrej Golle / Jernej Kovač; Barbara Jenko Bizjan; Kaja Tominc; Katarina Kozmos; Maja Rupnik; Marko Pokorn; Maruša Debeljak; Maša Jarčič; Mojca Cimerman; Nika Gobec; Nika Volmajer; Robert Šket; Sandra Janežic; Tadej Battelino; Tine Tesovnik; Tjasa Žohar Čretnik                                                                                                                       |
| EPI_ISL_647978, EPI_ISL_1191782, EPI_ISL_191783, EPI_ISL_191819                                                                                                                                                                                                                                                                                                                                                                                                                                                                                                                                                                                                                                                                                                                                                                                                                                                                                                                                                                                                                                                                                                                                                                                                                                                                                                                                                                                                                                                                                                                                                                                                                                                                                                                                                                                                                                                                                                                                                                                                                                                                                                                                                                                                                                                                                                                                                                                                                                                                                                                          | National Microbiology Reference Laboratory                                                                                                                         | Quadram Institute Bioscience                                                                                                                                                                                        | Agnes Juru; Alexander Goredema; Ana-Victoria Gutierrez; Andrew J. Page; Andrew Tarupiuwa; Barbra Murwira; Beuty Makamure; Charles Nyagupe; David Baker; Faustinos T Takawira; Gaetan Thilliez; Gemma Kay; Gibson Mhlanga; Hlanai Gumbo; Isaac Phiri; Justin O'Grady; Kenneth K Maeka; Leonardo de Oliveira Martins; Muchaneta Mugabe; Portia Manangazira; Raiva Simbi; Robert Kingsley; Sekesai Zinyowera; Tapfumanai Mashe; Tatenda Takawira; Thanh Le Viet |
| EPI_ISL_2492564, EPI_ISL_2492582, EPI_ISL_2492586, EPI_ISL_2492596, EPI_ISL_2492628, EPI_ISL_2492654, EPI_ISL_2492693, EPI_ISL_2492793, EPI_ISL_2492918                                                                                                                                                                                                                                                                                                                                                                                                                                                                                                                                                                                                                                                                                                                                                                                                                                                                                                                                                                                                                                                                                                                                                                                                                                                                                                                                                                                                                                                                                                                                                                                                                                                                                                                                                                                                                                                                                                                                                                                                                                                                                                                                                                                                                                                                                                                                                                                                                                  | see above                                                                                                                                                          | National Microbiology Reference Laboratory, Ministry of Health, Harare, Zimbabwe                                                                                                                                    | Agnes Juru; Air Comodor Dr J. Chimedza; Charles Nyagupe; Dr Raiva Simbi; Emmanuel SJ; Giandhari J; Hlanai Gumbo; Kenneth Maeka; Naidoo Y; Pillay S; Tapfumanai Mashe; Tatenda Takawira; Tegally H; Wilkinson E; de Oliveira T                                                                                                                                                                                                                                |
| EPI_ISL_2479956, EPI_ISL_2479957, EPI_ISL_2479966, EPI_ISL_2479968, EPI_ISL_2479972, EPI_ISL_2479975, EPI_ISL_2479976, EPI_ISL_2479979, EPI_ISL_2479981, EPI_ISL_2479982, EPI_ISL_2479983, EPI_ISL_2479984, EPI_ISL_2479985                                                                                                                                                                                                                                                                                                                                                                                                                                                                                                                                                                                                                                                                                                                                                                                                                                                                                                                                                                                                                                                                                                                                                                                                                                                                                                                                                                                                                                                                                                                                                                                                                                                                                                                                                                                                                                                                                                                                                                                                                                                                                                                                                                                                                                                                                                                                                              | see above                                                                                                                                                          | National Public Health Laboartory                                                                                                                                                                                   | Jyoti Acharya; Lokbandhu Chaudhary; Priya Jha; Runa Jha; Suni Dangol                                                                                                                                                                                                                                                                                                                                                                                         |
| EPI_ISL_1972889, EPI_ISL_2001482                                                                                                                                                                                                                                                                                                                                                                                                                                                                                                                                                                                                                                                                                                                                                                                                                                                                                                                                                                                                                                                                                                                                                                                                                                                                                                                                                                                                                                                                                                                                                                                                                                                                                                                                                                                                                                                                                                                                                                                                                                                                                                                                                                                                                                                                                                                                                                                                                                                                                                                                                         | National Public Health Laboratory Malaysia                                                                                                                         | National Public Health Laboratory Malaysia                                                                                                                                                                          | Aziyati O; Chong CK; Hani MH; Hannah PYP; JL Tan; Kamal HKZ; Mohd AY; Noorliza MN; Norazimah T Rehan SAB Selvanesan S; Norhayati R; NurulAina MCA; Nurulsyahida I; Ushananthiny R; W.NurAfiza WMA Zirwatul AA; YF Ngeow; Yukie C                                                                                                                                                                                                                             |
| EPI_ISL_2450770, EPI_ISL_2450790, EPI_ISL_2450791, EPI_ISL_2450793, EPI_ISL_2450794, EPI_ISL_2450796, EPI_ISL_2450798, EPI_ISL_2450803, EPI_ISL_2450809                                                                                                                                                                                                                                                                                                                                                                                                                                                                                                                                                                                                                                                                                                                                                                                                                                                                                                                                                                                                                                                                                                                                                                                                                                                                                                                                                                                                                                                                                                                                                                                                                                                                                                                                                                                                                                                                                                                                                                                                                                                                                                                                                                                                                                                                                                                                                                                                                                  | see above                                                                                                                                                          | National Public Health Laboratory, Ministry of Health, Ministry of Health, Republic of South Sudan                                                                                                                  | Abe G. Abias; Dan Lule Bugembe; Dennis Kenyi Lodiongo; James Ayel; John Rumunu; Joseph Francis Wamala; Juma John HM; Luj Loloj Deng; Matthew Cotten; My V.T. Phan; Pontiano Kaleebu; Richard Lino Loro Lako; Sudhir Bunga                                                                                                                                                                                                                                    |
| EPI_ISL_443201, EPI_ISL_498582, EPI_ISL_596456, EPI_ISL_596477, EPI_ISL_626632, EPI_ISL_654811, EPI_ISL_693321, EPI_ISL_754105, EPI_ISL_833380, EPI_ISL_891244, EPI_ISL_1081930, EPI_ISL_1081947, EPI_ISL_1098834, EPI_ISL_1098837, EPI_ISL_1252448, EPI_ISL_1476995, EPI_ISL_1477018, EPI_ISL_1489726, EPI_ISL_1524792, EPI_ISL_1543981, EPI_ISL_1620131, EPI_ISL_1620148, EPI_ISL_1620158, EPI_ISL_1620159, EPI_ISL_1634428, EPI_ISL_1634431, EPI_ISL_1634433, EPI_ISL_1652113, EPI_ISL_1652114, EPI_ISL_1652117, EPI_ISL_1652118, EPI_ISL_1652122, EPI_ISL_1652123, EPI_ISL_1652532, EPI_ISL_1704830, EPI_ISL_1704831, EPI_ISL_1704832, EPI_ISL_1704833, EPI_ISL_1704834, EPI_ISL_1704835, EPI_ISL_1704836, EPI_ISL_1704837, EPI_ISL_1704838, EPI_ISL_1704839, EPI_ISL_1704840, EPI_ISL_1704841, EPI_ISL_1704842, EPI_ISL_1719885, EPI_ISL_1719886, EPI_ISL_1719887, EPI_ISL_1719888, EPI_ISL_1719889, EPI_ISL_1719890, EPI_ISL_1719891, EPI_ISL_1719892, EPI_ISL_1719893, EPI_ISL_1719894, EPI_ISL_1719896, EPI_ISL_1719897, EPI_ISL_1719898, EPI_ISL_1719899, EPI_ISL_1719900, EPI_ISL_1719904, EPI_ISL_1752677, EPI_ISL_1816935, EPI_ISL_1816944, EPI_ISL_1816945, EPI_ISL_1816946, EPI_ISL_1816947, EPI_ISL_1816948, EPI_ISL_1816949, EPI_ISL_1816950, EPI_ISL_1816951, EPI_ISL_1816952, EPI_ISL_1816953, EPI_ISL_1816954, EPI_ISL_1816955, EPI_ISL_1816956, EPI_ISL_1816957, EPI_ISL_1816958, EPI_ISL_1816959, EPI_ISL_1816960, EPI_ISL_1816961, EPI_ISL_1816962, EPI_ISL_1816963, EPI_ISL_1816964, EPI_ISL_1816965, EPI_ISL_1816966, EPI_ISL_1816967, EPI_ISL_1816968, EPI_ISL_1816969, EPI_ISL_1816970, EPI_ISL_1816971, EPI_ISL_1816972, EPI_ISL_1816973, EPI_ISL_1897601, EPI_ISL_1897602, EPI_ISL_1897603, EPI_ISL_1897604, EPI_ISL_1897605, EPI_ISL_1897606, EPI_ISL_1897608, EPI_ISL_1897609, EPI_ISL_1897610, EPI_ISL_1897611, EPI_ISL_1897612, EPI_ISL_1897613, EPI_ISL_1897614, EPI_ISL_1897615, EPI_ISL_1897616, EPI_ISL_1897617, EPI_ISL_1897618, EPI_ISL_1897619, EPI_ISL_1897620, EPI_ISL_1897621, EPI_ISL_1914639, EPI_ISL_1914640, EPI_ISL_1914641, EPI_ISL_1914644, EPI_ISL_1914645, EPI_ISL_1914646, EPI_ISL_1914647, EPI_ISL_1914648, EPI_ISL_1914649, EPI_ISL_1914650, EPI_ISL_2349738, EPI_ISL_2349739, EPI_ISL_2349741, EPI_ISL_2349742, EPI_ISL_2349743, EPI_ISL_2349744, EPI_ISL_2349745, EPI_ISL_2349746, EPI_ISL_2349748, EPI_ISL_2349752, EPI_ISL_2349753, EPI_ISL_2349755, EPI_ISL_2349759, EPI_ISL_2349761, EPI_ISL_2349765, EPI_ISL_2349766, EPI_ISL_2349767, EPI_ISL_2349791, EPI_ISL_2349870, EPI_ISL_2508853, EPI_ISL_2508863, EPI_ISL_2509047, | see above                                                                                                                                                          | National Public Health Laboratory, National Centre for Infectious Diseases                                                                                                                                          | Chavatte JM; Chavatte Jean-Marc; Cui L; Cui Lin; Grace Jie Yin Ngan; Lin Cui; Lin RTP; Lin Raymond Tzer Pin; Mak TM; Mak Tze Minn; Octavia S; Octavia Sophie; Raymond Tzer Pin Lin; Royce Ang; Sophie Octavia; Tze Minn Mak; Zhenyang Zhou; Zhou Z                                                                                                                                                                                                           |
| EPI_ISL_1911215                                                                                                                                                                                                                                                                                                                                                                                                                                                                                                                                                                                                                                                                                                                                                                                                                                                                                                                                                                                                                                                                                                                                                                                                                                                                                                                                                                                                                                                                                                                                                                                                                                                                                                                                                                                                                                                                                                                                                                                                                                                                                                                                                                                                                                                                                                                                                                                                                                                                                                                                                                          | Naval Infectious Diseases Diagnostic Laboratory                                                                                                                    | Naval Medical Research Center Biological Defense Research Directorate                                                                                                                                               | Andrea Luquette; Andrew Bennett; Bishwo Adhikari; Catherine Arnold; Francisco Malagon Bautista; Gregory Rice; Kimberly Bishop-Lilly; Kyle Long; Lindsay Glang; Logan Voegtly; Megan Schilling; Michael Deschenes; Regina Cer; Victor Sugiharto                                                                                                                                                                                                               |
| EPI_ISL_2533882, EPI_ISL_2533883                                                                                                                                                                                                                                                                                                                                                                                                                                                                                                                                                                                                                                                                                                                                                                                                                                                                                                                                                                                                                                                                                                                                                                                                                                                                                                                                                                                                                                                                                                                                                                                                                                                                                                                                                                                                                                                                                                                                                                                                                                                                                                                                                                                                                                                                                                                                                                                                                                                                                                                                                         | Naval Medical Research Unit No. 3                                                                                                                                  | Naval Medical Research Center Biological Defense Research Directorate                                                                                                                                               | Andrea E. Luquette; Andrew J. Bennett; Bishwo N. Adhikari; Catherine E. Arnold; Chaselynn M. Watters; Emily K. Stefanov; Francisco Malagon; Kyle A. Long; Logan J. Voegtly; Luis A. Estrella; Michael V. Deschenes; Regina Z. Cer; Stephen M. Egan; and Kimberly A. Bishop-Lilly                                                                                                                                                                             |
| EPI_ISL_1169915, EPI_ISL_1626541, EPI_ISL_1648135                                                                                                                                                                                                                                                                                                                                                                                                                                                                                                                                                                                                                                                                                                                                                                                                                                                                                                                                                                                                                                                                                                                                                                                                                                                                                                                                                                                                                                                                                                                                                                                                                                                                                                                                                                                                                                                                                                                                                                                                                                                                                                                                                                                                                                                                                                                                                                                                                                                                                                                                        | Nebraska Public Health Laboratory                                                                                                                                  | NPHL COVID-19 Response Team                                                                                                                                                                                         | NPHL COVID-19 Response Team                                                                                                                                                                                                                                                                                                                                                                                                                                  |
| EPI_ISL_475200                                                                                                                                                                                                                                                                                                                                                                                                                                                                                                                                                                                                                                                                                                                                                                                                                                                                                                                                                                                                                                                                                                                                                                                                                                                                                                                                                                                                                                                                                                                                                                                                                                                                                                                                                                                                                                                                                                                                                                                                                                                                                                                                                                                                                                                                                                                                                                                                                                                                                                                                                                           | Nebraska Public Health Laboratory                                                                                                                                  | UNMC COVID-19 Response Team                                                                                                                                                                                         | UNMC COVID-19 Response Team                                                                                                                                                                                                                                                                                                                                                                                                                                  |
| EPI_ISL_1219819, EPI_ISL_1219842, EPI_ISL_1263138, EPI_ISL_2612502                                                                                                                                                                                                                                                                                                                                                                                                                                                                                                                                                                                                                                                                                                                                                                                                                                                                                                                                                                                                                                                                                                                                                                                                                                                                                                                                                                                                                                                                                                                                                                                                                                                                                                                                                                                                                                                                                                                                                                                                                                                                                                                                                                                                                                                                                                                                                                                                                                                                                                                       | Nevada State Public Health Laboratory                                                                                                                              | Nevada State Public Health Laboratory                                                                                                                                                                               | Andrew Gorzalski; Mark Pandori                                                                                                                                                                                                                                                                                                                                                                                                                               |
| EPI_ISL_2598136                                                                                                                                                                                                                                                                                                                                                                                                                                                                                                                                                                                                                                                                                                                                                                                                                                                                                                                                                                                                                                                                                                                                                                                                                                                                                                                                                                                                                                                                                                                                                                                                                                                                                                                                                                                                                                                                                                                                                                                                                                                                                                                                                                                                                                                                                                                                                                                                                                                                                                                                                                          | New Mexico Department of Health Scientific Laboratory                                                                                                              | Center for Global Health, University of New Mexico Health Sciences Center                                                                                                                                           | Anastacia Griego; Darrell Dinwiddie; Daryl Domman; Joseph Hicks; Kurt Schwalm; Michael Edwards; Twila Kunde; Valerie Morley                                                                                                                                                                                                                                                                                                                                  |
| EPI_ISL_1256029, EPI_ISL_1805388                                                                                                                                                                                                                                                                                                                                                                                                                                                                                                                                                                                                                                                                                                                                                                                                                                                                                                                                                                                                                                                                                                                                                                                                                                                                                                                                                                                                                                                                                                                                                                                                                                                                                                                                                                                                                                                                                                                                                                                                                                                                                                                                                                                                                                                                                                                                                                                                                                                                                                                                                         | New Mexico Department of Health Scientific Laboratory                                                                                                              | New Mexico Department of Health Scientific Laboratory                                                                                                                                                               | Anastacia Griego-Fisher; D'eldra Malone; Ellie Johnson; Jennifer Benoit; Linda Salazar; Ratheesh Rajan                                                                                                                                                                                                                                                                                                                                                       |

|                                                                                                                                                                                                                                                                                                                                                                                                                                                        |                                                                                                                                   |                                                                                                                                                           |                                                                                                                                                                                                                                                                                                                                                                                                                                                                                                                                                                                                                                                                                                                                                                                                                                                                                                                                                                                  |
|--------------------------------------------------------------------------------------------------------------------------------------------------------------------------------------------------------------------------------------------------------------------------------------------------------------------------------------------------------------------------------------------------------------------------------------------------------|-----------------------------------------------------------------------------------------------------------------------------------|-----------------------------------------------------------------------------------------------------------------------------------------------------------|----------------------------------------------------------------------------------------------------------------------------------------------------------------------------------------------------------------------------------------------------------------------------------------------------------------------------------------------------------------------------------------------------------------------------------------------------------------------------------------------------------------------------------------------------------------------------------------------------------------------------------------------------------------------------------------------------------------------------------------------------------------------------------------------------------------------------------------------------------------------------------------------------------------------------------------------------------------------------------|
| EPI_ISL_1227165<br>EPI_ISL_2565897                                                                                                                                                                                                                                                                                                                                                                                                                     | New York Presbyterian Hospital<br>Nigeria Centre for Disease Control (NCDC)                                                       | Wadsworth Center, New York State Department of Health<br>Africa Centre for Excellence for Genomics of Infectious Diseases (ACEGID), Redeemer's University | Alexis Russel; Daryl M. Lamson; Erasmus Schneider; Erica Lasek-Nesselquist; John Kelly; Jonathan Pitlnick; Kirsten St. George; Matthew Shudt; Melissa A Leisner; Navjot Singh A.T.; Abechi; Ajogbasile; Akano; C.A.; C.T.; Eromon; F.V.; Folarin, O.; Happi; I.B.; J.N.; J.U.; K.O.; Kayode; Nosamiefan, I.; Oguzie; Olawoye; Olumade; Oluniyi; P.E.; P.S.; T.J.; Ugwu; Uwanibe                                                                                                                                                                                                                                                                                                                                                                                                                                                                                                                                                                                                  |
| EPI_ISL_1970547,<br>EPI_ISL_1970551                                                                                                                                                                                                                                                                                                                                                                                                                    | Nigeria Centre for Disease Control (NCDC)                                                                                         | African Centre for Excellence for Genomics of Infectious Diseases (ACEGID), Redeemer's University                                                         | A.T.; Abechi; Ajogbasile; Akano; C.A.; C.T.; Eromon; F.V.; Folarin, O.; Happi; I.B.; J.N.; J.U.; K.O.; Kayode; Oguzie; Olawoye; Olumade; Oluniyi; P.E.; P.S.; T.J.; Ugwu; Uwanibe                                                                                                                                                                                                                                                                                                                                                                                                                                                                                                                                                                                                                                                                                                                                                                                                |
| EPI_ISL_941277,<br>EPI_ISL_1242017,<br>EPI_ISL_1242018,<br>EPI_ISL_1242019                                                                                                                                                                                                                                                                                                                                                                             | Nigeria Centre for Disease Control (NCDC)                                                                                         | African Centre of Excellence for Genomics of Infectious Diseases (ACEGID), Redeemer's University                                                          | Oluniyi P.E. et al                                                                                                                                                                                                                                                                                                                                                                                                                                                                                                                                                                                                                                                                                                                                                                                                                                                                                                                                                               |
| EPI_ISL_455429, EPI_ISL_527882, EPI_ISL_729925, EPI_ISL_729985, EPI_ISL_729991, EPI_ISL_730026, EPI_ISL_730035, EPI_ISL_730048<br>see above                                                                                                                                                                                                                                                                                                            | Nigeria Centre for Disease Control (NCDC)                                                                                         | African Centre of Excellence for Genomics of Infectious Diseases (ACEGID), Redeemer's University, Ede, Osun State, Nigeria                                | Ajogbasile F.V.; Folarin O.A.; Happi C.T.; Ihekweazu C.; Kayode A.; Oguzie J.; Olawoye I.; Olumade T.; Oluniyi P.E.; Oluniyi P.E. et al; Uwanibe J.                                                                                                                                                                                                                                                                                                                                                                                                                                                                                                                                                                                                                                                                                                                                                                                                                              |
| EPI_ISL_2240750,<br>EPI_ISL_2240755,<br>EPI_ISL_2240758,<br>EPI_ISL_2240762,<br>EPI_ISL_2285317                                                                                                                                                                                                                                                                                                                                                        | Nigeria Centre for Disease Control (NCDC)                                                                                         | African Centre of Excellence for Genomics of Infectious Diseases (ACEGID), Redeemer's University                                                          | A.T.; Abechi; Ajogbasile; Akano; C.A.; C.T.; Eromon; F.V.; Folarin, O.; Happi; I.B.; J.N.; J.U.; K.O.; Kayode; Nosamiefan, I.; Oguzie; Olawoye; Olumade; Oluniyi; P.E.; P.S.; T.J.; Ugwu; Uwanibe                                                                                                                                                                                                                                                                                                                                                                                                                                                                                                                                                                                                                                                                                                                                                                                |
| EPI_ISL_2335052,<br>EPI_ISL_2384261,<br>EPI_ISL_2565933,<br>EPI_ISL_2565965                                                                                                                                                                                                                                                                                                                                                                            | North Dakota Department of Health, Public Health Laboratory                                                                       | North Dakota Department of Health, Public Health Laboratory                                                                                               | Lisa Wingerter                                                                                                                                                                                                                                                                                                                                                                                                                                                                                                                                                                                                                                                                                                                                                                                                                                                                                                                                                                   |
| EPI_ISL_579096,<br>EPI_ISL_579406                                                                                                                                                                                                                                                                                                                                                                                                                      | North Shore Hospital                                                                                                              | Institute of Environmental Science and Research (ESR)                                                                                                     | Anja Werno; Antje van der Linden; Arlo Upton; Chris Mansell; David Hammer; Dragana Drinkovic; Erasmus Smit; Gary McAuliffe; Hana Sofia Andersson; Hermes Perez; James Ussher; Jill Sherwood; Jing Wang; Joep de Lig; Josh Freeman; Julia Howard; Juliet Elvy; Lauren Jelly; Mary DeAlmeida; Matt Blakiston; Matt Storey; Matthew Rogers; Max Bloomfield; Michael Addidle; Michelle Balm; Muhammad Faisal; Nikki Freed; Olin Silander; Sally Roberts; Sarah Jefferies; Sharmini Muttaiyah; Susan Morpeth; Susan Taylor; Timothy Blackmore; Vani Sathendran; Veronica Playle; Virginia Hope; Xiaoyun Ren                                                                                                                                                                                                                                                                                                                                                                           |
| EPI_ISL_2156187                                                                                                                                                                                                                                                                                                                                                                                                                                        | Northern Mindanao TB Regional Center                                                                                              | Philippine Genome Center                                                                                                                                  | Alethea R. de Guzman; Anna Ong-Lim; Arianne A. Zamora; Asia Louisa U. Chong; Benedict A. Maralit; Candice Francheska B. Tambaon; Carlo M. Lapid; Celia Carlos; Devon Ray Pacial; Edsel Maurice Salvaña; El King D. Morado; Eva Maria Cutiongco-de la Paz; Francis A. Tablizo; Irish Coleen A. Asin; Jaime C. Montoya; Jan Michael C. Yap; Jo-Hannah S. Llamas; John Q. Wong; Joshua Gregor A. Dizon; Juan Antonio R. Magalang; Karol Sophia Agape R. Padilla; Kenneth M. Kim; Kris P. Punayan; Marc Edsel C. Ayes; Marc Jerrone R. Castro; Maria Rosario Singh-Vergeire and Cynthia P. Saloma; Maria Sofia L. Yangzon; Marissa Alejandria; Razel Nikka M. Hao; Rianna Patricia S. Cruz; Shella Mae M. Araiza                                                                                                                                                                                                                                                                     |
| EPI_ISL_2372961<br>EPI_ISL_936958<br>EPI_ISL_735447                                                                                                                                                                                                                                                                                                                                                                                                    | Northwestern Memorial Hospital<br>Northwestern Memorial Hospital<br>Nucleic Acid Testing - Rwanda National Reference Laboratory   | Northwestern University - Ozer Lab<br>Ozer Lab<br>GIGA Medical Genomics                                                                                   | Chad J. Achenbach; Chao Qi; Egon A. Ozer; Judd F. Hultquist; Lacy M. Simons; Lawrence J. Jennings; Michael G. Ison; Ramon Lorenzo-Redondo; Taylor J. Dean<br>Chad J. Achenbach; Egon A. Ozer; Judd F. Hultquist; Lacy M. Simons; Lawrence J. Jennings; Michael G. Ison; Ramon Lorenzo-Redondo<br>Bouchra Boujemla; Esperence Umumararungu; Jacob Souopgui; Keith Durkin; Léon Mutesa; Maria Artesi; Marie-Pierre Hayette; Patrick Tuyisenge; Robert Rutayisire; Sabin Nsanzimana; Swaibu Gatate; Sébastien Bontems; Vincent Bours; Yvan Butera                                                                                                                                                                                                                                                                                                                                                                                                                                   |
| EPI_ISL_925892, EPI_ISL_960251, EPI_ISL_960300, EPI_ISL_960302, EPI_ISL_2362488, EPI_ISL_2362491, EPI_ISL_2362493, EPI_ISL_2362508, EPI_ISL_2362511, EPI_ISL_2362515, EPI_ISL_2362517, EPI_ISL_2362523, EPI_ISL_2362526, EPI_ISL_2365914, EPI_ISL_2521981, EPI_ISL_2521988<br>see above                                                                                                                                                                | Nucleic Acid Testing, National Reference Laboratory                                                                               | GIGA Medical Genomics                                                                                                                                     | Bouchra Boujemla; Corinne Fasquelle; Esperence Umumararungu; Jacob Souopgui; Keith Durkin; Léon Mutesa; Maria Artesi; Marie-Pierre Hayette; Nathalie Renotte; Patrick Tuyisenge; Robert Rutayisire; Sabin Nsanzimana; Swaibu Gatate; Sébastien Bontems; Vincent Bours; Yvan Butera                                                                                                                                                                                                                                                                                                                                                                                                                                                                                                                                                                                                                                                                                               |
| EPI_ISL_2080768,<br>EPI_ISL_2227694,<br>EPI_ISL_2227695,<br>EPI_ISL_2462074                                                                                                                                                                                                                                                                                                                                                                            | OHSU Lab Services Molecular Microbiology Lab                                                                                      | Oregon SARS-CoV-2 Genome Sequencing Center                                                                                                                | Alec J. Hirsch; Andrew C. Adey; Benjamin N. Bimber; Brendan L. O'Connell; Brian J. O'Roak; Cierra LaBlanc; Daniel N. Streblow; Donna Hansel; Guang Fan; Kayla Carter; Ruth V. Nichols; Sally Grindstaff; Sonia Acharya; William B. Messer; Xuan Qin                                                                                                                                                                                                                                                                                                                                                                                                                                                                                                                                                                                                                                                                                                                              |
| EPI_ISL_1272810,<br>EPI_ISL_1272812                                                                                                                                                                                                                                                                                                                                                                                                                    | OK Public Health Laboratory, Oklahoma State DOH                                                                                   | Centers for Disease Control and Prevention Division of Viral Diseases, Pathogen Discovery                                                                 | Anna Montmayeur; Anna Uehara; Ben L. Rambo-Martin; Clinton R. Paden; Dhvani Batra; Haibin Wang; Jasmine Padilla; Jing Zhang; Justin Lee; Katie Dillon; Krista Queen; Kristen Knipe; Kristine Lacek; Lori Rowe; Mark Burroughs; Matthew Schmerer; Mili Sheth; Peter W. Cook; Rachel Marine; Sam Shepard; Sarah Nobles; Shoshona Le; Suxiang Tong; Yan Li; Ying Tao                                                                                                                                                                                                                                                                                                                                                                                                                                                                                                                                                                                                                |
| EPI_ISL_2295285,<br>EPI_ISL_2311769                                                                                                                                                                                                                                                                                                                                                                                                                    | OK Public Health Laboratory, Oklahoma State DOH                                                                                   | Genomics and Discovery, Respiratory Viruses Branch, Division of Viral Diseases, Centers for Disease Control and Prevention                                | Adam Retchless; Anna Kelleher; Anna Uehara; Brian Lynch; Clinton R. Paden; Dhvani Batra; Haibin Wang; Han Jia Justin Ng; Jasmine Padilla; Jing Zhang; Justin Lee; Krista Queen; Mark Burroughs; Mili Sheth; Morgan Davis; Peter Cook; Rachel Marine; Sarah Nobles; Suxiang Tong; Tara Coalter; Yan Li; Ying Tao                                                                                                                                                                                                                                                                                                                                                                                                                                                                                                                                                                                                                                                                  |
| EPI_ISL_1196869                                                                                                                                                                                                                                                                                                                                                                                                                                        | OK Public Health Laboratory, Oklahoma State DOH                                                                                   | Pathogen Discovery, Respiratory Viruses Branch, Division of Viral Diseases, Centers for Disease Control and Prevention                                    | Anna Kelleher; Anna Uehara; Brian Lynch; Clinton R. Paden; Haibin Wang; Han Jia Justin Ng; Jing Zhang; Krista Queen; Peter Cook; Suxiang Tong; Yan Li; Ying Tao                                                                                                                                                                                                                                                                                                                                                                                                                                                                                                                                                                                                                                                                                                                                                                                                                  |
| EPI_ISL_1678169                                                                                                                                                                                                                                                                                                                                                                                                                                        | OR State PHL-Virology/Immunology Section                                                                                          | Centers for Disease Control and Prevention Division of Viral Diseases, Pathogen Discovery                                                                 | Alison Laufer Halpin; Ben L. Rambo-Martin; Clinton R. Paden; Dakota Howard; Darlene Wagner; Dave Wentworth; Dhvani Batra; Jasmine Padilla; Justin Lee; Katie Dillon; Krista Queen; Kristen Knipe; Kristine Lacek; Mark Burroughs; Matthew Schmerer; Mili Sheth; Peter Cook; Sam Shepard; Sarah Nobles; Shoshona Le; Suxiang Tong; Vivien Dugan; Yvette Unoarumhi                                                                                                                                                                                                                                                                                                                                                                                                                                                                                                                                                                                                                 |
| EPI_ISL_468702<br>EPI_ISL_882796,<br>EPI_ISL_1138851                                                                                                                                                                                                                                                                                                                                                                                                   | Ochsner Health<br>Office of Diseases Prevention and Control Region 4 Saraburi                                                     | Bioinfoexperts, LLC<br>COVID-19 Network Investigations (CONI) Alliance                                                                                    | Amy Feehan; David J. Nolan; David Moraga Amador; Julia-Garcia-Diaz; Luke Caruso; Lydia Von Borstel; Rebecca Rose; Sissy Cross; Susanna L. Lamers; Tong Yang; Wayra Navia; Xiao Hui Zhou<br>Amormmas Kongkling; Anek Mungomokiang; Angkana Huang; Anthony R. Jones; Arporn Wangwiwatsin; Bhakbhoom Panthan; Chonticha Klungtong; Duangkamon Loesbanluetchai; Ekawat Pasomsob; Elizabeth Batty; Insee Sensorn; Janjira Thaipadungpanit; Jutikul Kaewmalakul; Kamolthip Atsawaranunt; Khajohn Joonlasak; Khajohn Joonlasak; Kingkan Rakmanee; Kittikorn Kumprornsin; Namfon Kotanan; Nathamon Runnachot; Pakjira Rimdusit; Payon Pengyo; Praima Moonmuang; Prayuth Kaewmalang; Pukkapon Parnwijitkul; Sataporn Hatsadichart; Sirinapa Singthong; Siriporn Lakesukthorn; Sirwan Yaemnimnuai; Stefan Fernandez; Suttrik Changchawai; Thanat Chookajorn; Theerarat Kochakarn; Treewat Watthanachockchai; Vichan Pawun; Wasun Chantratita; Wonvimol Lemprasert; Wuditchai Manasatienkij |
| EPI_ISL_2752169                                                                                                                                                                                                                                                                                                                                                                                                                                        | Ohio Department of Health Laboratory                                                                                              | Ohio Department of Health Laboratory                                                                                                                      | Allison Black; Brent Lee; Caitlin McDonnell; Eric Brandt; Erica Leasure; Glen McGillivray; Heather Blankenship; Holmes; Jade Mowery; Jennifer; Kelsey Florek; Keoni Omura; Kirtana Ramadugu; Quanta Brown; Stephanie Mccracken; Tyler Payne; and Tammy Bannerman                                                                                                                                                                                                                                                                                                                                                                                                                                                                                                                                                                                                                                                                                                                 |
| EPI_ISL_492014                                                                                                                                                                                                                                                                                                                                                                                                                                         | Oman-NIC                                                                                                                          | Department of Microbiology and Immunology-SQUH                                                                                                            | Abdulla Balkhair; Ahlam Al-Amri; Aisha Al-Amri; Aisha Al-Busaidi; Amina Al Jardani; Fahad Zadjali; Fatma BaAlawi; Hamida AL Barwani; Hanan Al-Kindi; Intisar Al-Shukri; Khulood Al-Mammary; Mohammed Al-Tobi; Samiha Al Kharusi; Samira Al-Maruqi; Zeyana AL-Dahmani                                                                                                                                                                                                                                                                                                                                                                                                                                                                                                                                                                                                                                                                                                             |
| EPI_ISL_1795052                                                                                                                                                                                                                                                                                                                                                                                                                                        | Oman-NIC                                                                                                                          | Oman-National Influenza Center-Department of Microbiology and Immunology-SQUH                                                                             | Abdulla Balkhair; Ahlam Al-Amri; Aisha Al-Amri; Aisha Al-Busaidi; Amina Al Jardani; Fahad Zadjali; Fatma BaAlawi; Hamida AL Barwani; Hanan Al-Kindi; Intisar Al-Shukri; Khulood Al-Mammary; Mohammed Al-Tobi; Samiha Al Kharusi; Samira Al-Maruqi; Zeyana AL-Dahmani                                                                                                                                                                                                                                                                                                                                                                                                                                                                                                                                                                                                                                                                                                             |
| EPI_ISL_491144,<br>EPI_ISL_1517192,<br>EPI_ISL_1532283,<br>EPI_ISL_1532301,<br>EPI_ISL_2603841,<br>EPI_ISL_2603855                                                                                                                                                                                                                                                                                                                                     | Oman-National Influenza Center                                                                                                    | Biotechnology & OMICs Laboratory                                                                                                                          | Abdul Latif Khan; Adil Al-Wahaibi; Adil Khan; Ahlam Al-Amri; Ahmed Al Harrasi; Ahmed Al-Harrasi; Ahmed Al-Rawahi; Ahmed N Al-Rawahi; Aisha Al-Amri; Aisha Al-Busaidi; Amal Al-Maani; Amina Al-Jardani; Amina Al-Jardani.; Bilal Hussain; Fahad Al-Balushi; Hanan Al-Kindi; Intisar Al-Shukri; Laila Al-Balushi; Sajjad Asfah; Samiha Al Kharusi; Samira Al-Mahruqi; Samiya Al-Zadjali; Saqib Bilal; Seif Al-Abri                                                                                                                                                                                                                                                                                                                                                                                                                                                                                                                                                                 |
| EPI_ISL_2166354<br>EPI_ISL_1848351,<br>EPI_ISL_1897475,<br>EPI_ISL_2139553,<br>EPI_ISL_2473673,<br>EPI_ISL_2557940                                                                                                                                                                                                                                                                                                                                     | Omega Diagnostics at Mounes<br>Oregon State Public Health Laboratory                                                              | Omega Diagnostics at Mounes<br>Oregon State Public Health Laboratory                                                                                      | Ashleigh McGrail; Cynthia Corley; Latira HAYnes-Jacob; Vivek Khare MD<br>Eugene Yeboah; John Fontana and Shane Sevey; Laura Tsakanridis; Rafia Razzaque; Vanda Makris                                                                                                                                                                                                                                                                                                                                                                                                                                                                                                                                                                                                                                                                                                                                                                                                            |
| EPI_ISL_1253654<br>EPI_ISL_1730635, EPI_ISL_1730640, EPI_ISL_1979258, EPI_ISL_1979296, EPI_ISL_1979362, EPI_ISL_1979377, EPI_ISL_1979393, EPI_ISL_2624685, EPI_ISL_2624902, EPI_ISL_2707793, EPI_ISL_2707795, EPI_ISL_2707913, EPI_ISL_2707947, EPI_ISL_2708019, EPI_ISL_2749956, EPI_ISL_2749962, EPI_ISL_2750058, EPI_ISL_2750131, EPI_ISL_2750271, EPI_ISL_2750323, EPI_ISL_2750439, EPI_ISL_2750473, EPI_ISL_2750518, EPI_ISL_2750689<br>see above | Oregon State University TRACE Project<br>Originating lab: Wales Specialist Virology Centre Sequencing lab: Pathogen Genomics Unit | OSU Center for Genome Research and Biocomputing<br>Public Health Wales Microbiology Cardiff Wales Specialist Virology Centre                              | Oregon State University TRACE Project<br>Alec Birchley; Alexander Adams; Amy Gaskin; Angela Marchbank; Bree Gatica-Wilcox; Catherine Moore; Jane Coombes; Joanne Watkins; Joel Southgate; Johnathan Evans; Laura Gifford; Lauren Gilbert; Lee Graham; Malorie Perry; Matthew Bull; Nicole Pacchiarini; Sally Corden; Sara Kumziene-Summerhayes; Sara Rey; Sarah Taylor; Simon Cottrell; Sophie Jones; Tom Connor                                                                                                                                                                                                                                                                                                                                                                                                                                                                                                                                                                 |
| EPI_ISL_1578944,<br>EPI_ISL_1599391,<br>EPI_ISL_1819813,<br>EPI_ISL_2323330                                                                                                                                                                                                                                                                                                                                                                            | Ostfold Hospital Trust - Kalnes, Centre for Laboratory Medicine, Section for gene technology and infection serology               | Norwegian Institute of Public Health, Department of Virology                                                                                              | Atiya R Ali; Debech Nadia; Engebretsen Serina Beate; Garcia Llorente Ignacio; Hilde Elshaug; Hilde Vollan; Jon Bråte; Kamilla Heddeland Instefjord; Karoline Bragstad; Kathrine Stene-Johansen; Line Victoria Moen; Marie Paulsen Madsen; Olav Hungnes; Pedersen Benedikte Nevjen; Rasmus Riis Kopperud                                                                                                                                                                                                                                                                                                                                                                                                                                                                                                                                                                                                                                                                          |
| EPI_ISL_1273214,<br>EPI_ISL_1293350                                                                                                                                                                                                                                                                                                                                                                                                                    | Oxford University Clinical Research Unit (OUCRU)                                                                                  | Oxford University Clinical Research Unit (OUCRU)                                                                                                          | Guy Thwaites; Huynh Trung Trieu; Lam Minh Yen; Le Manh Hung; Le Nguyen Truc Nhu; Le Thi Thu Huong; Le Van Tan; Nghiem My Ngoc; Ngo Ngoc Quang Minh; Nguyen Thanh Dung; Nguyen Thanh Phong; Nguyen Thanh Truong; Nguyen Thi Thu Hong; Nguyen To Anh; Nguyen Tri Dung; Nguyen Van Vinh Chau; Tran Nguyen Hoang Tu; Tran Tan Thanh; le Thi Thu Huong; le Van Tan                                                                                                                                                                                                                                                                                                                                                                                                                                                                                                                                                                                                                    |
| EPI_ISL_2283729, EPI_ISL_2283735, EPI_ISL_2283747, EPI_ISL_2283748, EPI_ISL_2283750, EPI_ISL_2283751, EPI_ISL_2283752, EPI_ISL_2283754, EPI_ISL_2283755, EPI_ISL_2283756, EPI_ISL_2283757, EPI_ISL_2283759, EPI_ISL_2283761, EPI_ISL_2283762, EPI_ISL_2283763<br>see above                                                                                                                                                                             | PHV-FSS<br>PHV-FSS                                                                                                                | PHV-FSS                                                                                                                                                   | Son Nguyen                                                                                                                                                                                                                                                                                                                                                                                                                                                                                                                                                                                                                                                                                                                                                                                                                                                                                                                                                                       |
| EPI_ISL_596516,<br>EPI_ISL_596519,<br>EPI_ISL_596553,<br>EPI_ISL_596565                                                                                                                                                                                                                                                                                                                                                                                | Palestinian Ministry of Health                                                                                                    | Molecular Genetics Lab                                                                                                                                    | Damien Richard; Dana Najjar; Francois Balloux; Hisham Darwish; Husam Sallam; Issa Shateyah; Lucy van Dorp; Mahmoud Ruzayqat; Nouar Qutob; Osama Najjar; Zaidoun Salah                                                                                                                                                                                                                                                                                                                                                                                                                                                                                                                                                                                                                                                                                                                                                                                                            |
| EPI_ISL_707937                                                                                                                                                                                                                                                                                                                                                                                                                                         | Pamukkale University Hospital                                                                                                     | Pamukkale University Department of Medical Genetics                                                                                                       | Onur TOKGUN et al.                                                                                                                                                                                                                                                                                                                                                                                                                                                                                                                                                                                                                                                                                                                                                                                                                                                                                                                                                               |
| EPI_ISL_1470937, EPI_ISL_1470959, EPI_ISL_1635519, EPI_ISL_1828111, EPI_ISL_1828260, EPI_ISL_1828349, EPI_ISL_1828425, EPI_ISL_1828512, EPI_ISL_1828556, EPI_ISL_1828565, EPI_ISL_1828653, EPI_ISL_1828694, EPI_ISL_2037012, EPI_ISL_2037056, EPI_ISL_2037333, EPI_ISL_2631390<br>see above                                                                                                                                                            | Pandemic Response Lab - NYC                                                                                                       | Pandemic Response Lab, R&D                                                                                                                                | Cybil del Castillo; Dylan Law; Haiping Hao; Henry Lee; Jon Laurent; Katharine Nelson; Melissa Hopkins; Michael Hammerling; Pradeep Bugga; Shinyoung Clair Kang; Sol Rey; William Ward                                                                                                                                                                                                                                                                                                                                                                                                                                                                                                                                                                                                                                                                                                                                                                                            |
| EPI_ISL_12819050                                                                                                                                                                                                                                                                                                                                                                                                                                       | Pasig City Children's Hospital - Child's Hope                                                                                     | Philippine Genome Center                                                                                                                                  | Alethea R. de Guzman; Anna Ong-Lim; Arianne A. Zamora; Asia Louisa U. Chong; Benedict A. Maralit; Candice Francheska B. Tambaon; Carlo M. Lapid; Celia Carlos; Devon Ray Pacial; Edsel Maurice Salvaña; El King D. Morado; Elcid Aaron R. Pangilinan; Eva Maria Cutiongco-de la Paz; Francis A. Tablizo; Irish Coleen A. Asin; Jaime C. Montoya; Jan Michael C. Yap; Jo-Hannah S. Llamas; John Q. Wong; Joshua Gregor A. Dizon; Juan Antonio R. Magalang; Karol Sophia Agape R. Padilla; Kenneth M. Kim; Kris P. Punayan; Marc Edsel C. Ayes; Maria Rosario Singh-Vergeire and Cynthia P. Saloma; Maria Sofia L. Yangzon; Marissa Alejandria; Razel Nikka M. Hao; Renato Jacinto Q. Mantaring; Rianna Patricia S. Cruz; Shella Mae M. Araiza                                                                                                                                                                                                                                     |



|                                                                                                                                                                                                                                                                                                                                                                                                                                                                                                                                                                                                                                                                                                                                                                                                                                                                                                                                                                                                                                                                                                                                                                                                                                                                                                                                                                              |                                                                                                                 |                                                                                                                                |                                                                                                                                                                                                                                                                                                                                                                                                                                                                                                                                                                                                                                                                                                                                                                       |
|------------------------------------------------------------------------------------------------------------------------------------------------------------------------------------------------------------------------------------------------------------------------------------------------------------------------------------------------------------------------------------------------------------------------------------------------------------------------------------------------------------------------------------------------------------------------------------------------------------------------------------------------------------------------------------------------------------------------------------------------------------------------------------------------------------------------------------------------------------------------------------------------------------------------------------------------------------------------------------------------------------------------------------------------------------------------------------------------------------------------------------------------------------------------------------------------------------------------------------------------------------------------------------------------------------------------------------------------------------------------------|-----------------------------------------------------------------------------------------------------------------|--------------------------------------------------------------------------------------------------------------------------------|-----------------------------------------------------------------------------------------------------------------------------------------------------------------------------------------------------------------------------------------------------------------------------------------------------------------------------------------------------------------------------------------------------------------------------------------------------------------------------------------------------------------------------------------------------------------------------------------------------------------------------------------------------------------------------------------------------------------------------------------------------------------------|
| EPI_ISL_2035941,<br>EPI_ISL_2035942,<br>EPI_ISL_2035945,<br>EPI_ISL_2035946,<br>EPI_ISL_2035949,<br>EPI_ISL_2035988                                                                                                                                                                                                                                                                                                                                                                                                                                                                                                                                                                                                                                                                                                                                                                                                                                                                                                                                                                                                                                                                                                                                                                                                                                                          | Pasteur Institute - Laboratory of Clinical Virology                                                             | Pasteur Institute - Laboratory of Clinical Virology                                                                            | Anissa Chouikha; Henda Triki; Kais Ghedira; Mariem Gdoura; Sondos Haddad; Wasfi Fares                                                                                                                                                                                                                                                                                                                                                                                                                                                                                                                                                                                                                                                                                 |
| EPI_ISL_2695822                                                                                                                                                                                                                                                                                                                                                                                                                                                                                                                                                                                                                                                                                                                                                                                                                                                                                                                                                                                                                                                                                                                                                                                                                                                                                                                                                              | PathCare, Cape Town                                                                                             | Division of Medical Virology, National Health Laboratory Service (NHLS), Tygerberg Hospital / Stellenbosch University          | Bronwyn Kleinhans; Gert van Zyl; Jean Maritz; Petra Raimond; San Emmanuel James; Susan Engelbrecht; Tania Stander; Tongai Maponga; Tulo de Oliveira; Wolfgang Preiser                                                                                                                                                                                                                                                                                                                                                                                                                                                                                                                                                                                                 |
| EPI_ISL_456163, EPI_ISL_456222, EPI_ISL_456301, EPI_ISL_582018, EPI_ISL_582021, EPI_ISL_622805, EPI_ISL_755626                                                                                                                                                                                                                                                                                                                                                                                                                                                                                                                                                                                                                                                                                                                                                                                                                                                                                                                                                                                                                                                                                                                                                                                                                                                               | see above                                                                                                       | PathLab Bay of Plenty                                                                                                          | Institute of Environmental Science and Research (ESR)                                                                                                                                                                                                                                                                                                                                                                                                                                                                                                                                                                                                                                                                                                                 |
| see above                                                                                                                                                                                                                                                                                                                                                                                                                                                                                                                                                                                                                                                                                                                                                                                                                                                                                                                                                                                                                                                                                                                                                                                                                                                                                                                                                                    | PathLab Bay of Plenty                                                                                           | Institute of Environmental Science and Research (ESR)                                                                          | Anja Werno; Antje van der Linden; Arlo Upton; Chris Mansell; David Hammer; Dragana Drinkovic; Erasmus Smit; Gary McAuliffe; Hana Sofia Andersson; Hermes Perez; James Ussher; Jill Sherwood; Jing Wang; Joep de Lig; Josh Freeman; Julia Howard; Juliet Elvy; Lauren Jelly; Mary DeAlmeida; Matt Blakiston; Matt Storey; Matthew Rogers; Max Bloomfield; Michael Addidle; Michelle Balm; Muhammad Faisal; Nikki Freed; Olin Silander; Sally Roberts; Sarah Jefferies; Sharmini Muttaiyah; Susan Morpeth; Susan Taylor; Timothy Blackmore; Vani Sathyendran; Veronica Playle; Virginia Hope; Xiaoyun Ren                                                                                                                                                               |
| EPI_ISL_2013036                                                                                                                                                                                                                                                                                                                                                                                                                                                                                                                                                                                                                                                                                                                                                                                                                                                                                                                                                                                                                                                                                                                                                                                                                                                                                                                                                              | Pathcare-Vermaak Centurion                                                                                      | National Institute for Communicable Diseases of the National Health Laboratory Service                                         | Amoako DG; Bhiman JN; Glass A; Gottberg A; Mahlangu B; Mohale T; Ntuli N; Oliveira TD; Scheepers C; Tegally H; Viana R                                                                                                                                                                                                                                                                                                                                                                                                                                                                                                                                                                                                                                                |
| EPI_ISL_437483, EPI_ISL_437695, EPI_ISL_437743, EPI_ISL_512923, EPI_ISL_513113, EPI_ISL_513178, EPI_ISL_513211, EPI_ISL_678159                                                                                                                                                                                                                                                                                                                                                                                                                                                                                                                                                                                                                                                                                                                                                                                                                                                                                                                                                                                                                                                                                                                                                                                                                                               | see above                                                                                                       | Pathogen Genomics Lab King Abdullah University of Science and Technology(KAUST)                                                | Abbas Al Mutairi; Abdulaziz Alahmadi; Afrah Alsomali; Ahmad Bakur Mahmoud; Amanda; Amanda Ooi; Amit Kumar Subudhi; Amit Subudhi; Anwar Hashem; Arnab Pain; Asim Khogeer; Awad Al-Omari; Fadwa Alofi; Fathia Ben Rached; Fathia Ben-Rached; Fathia Rached; Jumana Taha; Kahled Aligithami; Khaled Aligithami; Luke; Luke Esau; Naif Almontashiri; Raeece Naeem; Rahul P Salunke; Rahul Salunke; Samer Salih; Sara Mfarrej; Sharif Hala                                                                                                                                                                                                                                                                                                                                 |
| EPI_ISL_2153940                                                                                                                                                                                                                                                                                                                                                                                                                                                                                                                                                                                                                                                                                                                                                                                                                                                                                                                                                                                                                                                                                                                                                                                                                                                                                                                                                              | Philippine Genome Center - Biobank (NCR)                                                                        | Philippine Genome Center                                                                                                       | Alethea R. de Guzman; Anna Ong-Lim; Arianne A. Zamora; Asia Louisa U. Chong; Benedict A. Maralit; Candice Francheska B. Tambaoan; Carlo M. Lapid; Celia Carlos; Devon Ray Pacial; Edsel Maurice Salvaña; El King D. Morado; Eva Maria Cutiongco-de la Paz; Francis A. Tablizo; Irish Coleen A. Asin; Jaime C. Montoya; Jan Michael C. Yap; Jo-Hannah S. Llamas; John Q. Wong; Joshua Gregor A. Dizon; Juan Antonio R. Magalang; Karol Sophia Agape R. Padilla; Kenneth M. Kim; Kris P. Punayan; Marc Edsel C. Ayes; Marc Jerrone R. Castro; Maria Rosario Singh-Vergeire and Cynthia P. Saloma; Maria Sofia L. Yangzon; Marissa Alejandria; Razel Nikka M. Hao; Rianna Patricia S. Cruz; Sheila Mae M. Araiza                                                         |
| EPI_ISL_2153914                                                                                                                                                                                                                                                                                                                                                                                                                                                                                                                                                                                                                                                                                                                                                                                                                                                                                                                                                                                                                                                                                                                                                                                                                                                                                                                                                              | Philippine Genome Center - Biobank (Region IV-A)                                                                | Philippine Genome Center                                                                                                       | Alethea R. de Guzman; Anna Ong-Lim; Arianne A. Zamora; Asia Louisa U. Chong; Benedict A. Maralit; Candice Francheska B. Tambaoan; Carlo M. Lapid; Celia Carlos; Devon Ray Pacial; Edsel Maurice Salvaña; El King D. Morado; Eva Maria Cutiongco-de la Paz; Francis A. Tablizo; Irish Coleen A. Asin; Jaime C. Montoya; Jan Michael C. Yap; Jo-Hannah S. Llamas; John Q. Wong; Joshua Gregor A. Dizon; Juan Antonio R. Magalang; Karol Sophia Agape R. Padilla; Kenneth M. Kim; Kris P. Punayan; Marc Edsel C. Ayes; Marc Jerrone R. Castro; Maria Rosario Singh-Vergeire and Cynthia P. Saloma; Maria Sofia L. Yangzon; Marissa Alejandria; Razel Nikka M. Hao; Rianna Patricia S. Cruz; Sheila Mae M. Araiza                                                         |
| EPI_ISL_2558052                                                                                                                                                                                                                                                                                                                                                                                                                                                                                                                                                                                                                                                                                                                                                                                                                                                                                                                                                                                                                                                                                                                                                                                                                                                                                                                                                              | Philippine Red Cross - Clark Molecular Laboratory                                                               | Philippine Genome Center                                                                                                       | Alethea R. de Guzman; Anna Ong-Lim; Arianne A. Zamora; Asia Louisa U. Chong; Benedict A. Maralit; Candice Francheska B. Tambaoan; Carlo M. Lapid; Celia Carlos; Devon Ray Pacial; Edsel Maurice Salvaña; El King D. Morado; Elcid Aaron R. Pangilinan; Eva Maria Cutiongco-de la Paz; Francis A. Tablizo; Irish Coleen A. Asin; Jaime C. Montoya; Jan Michael C. Yap; Jo-Hannah S. Llamas; John Q. Wong; Joshua Gregor A. Dizon; Juan Antonio R. Magalang; Karol Sophia Agape R. Padilla; Kenneth M. Kim; Kris P. Punayan; Marc Edsel C. Ayes; Marc Jerrone R. Castro; Maria Rosario Singh-Vergeire and Cynthia P. Saloma; Maria Sofia L. Yangzon; Marissa Alejandria; Razel Nikka M. Hao; Renato Jacinto Q. Mantaring; Rianna Patricia S. Cruz; Sheila Mae M. Araiza |
| EPI_ISL_2105487                                                                                                                                                                                                                                                                                                                                                                                                                                                                                                                                                                                                                                                                                                                                                                                                                                                                                                                                                                                                                                                                                                                                                                                                                                                                                                                                                              | Philippine Red Cross Logistics and Multipurpose Center                                                          | Philippine Genome Center                                                                                                       | Alethea R. de Guzman; Anna Ong-Lim; Arianne A. Zamora; Asia Louisa U. Chong; Benedict A. Maralit; Candice Francheska B. Tambaoan; Carlo M. Lapid; Celia Carlos; Devon Ray Pacial; Edsel Maurice Salvaña; El King D. Morado; Eva Maria Cutiongco-de la Paz; Francis A. Tablizo; Irish Coleen A. Asin; Jaime C. Montoya; Jan Michael C. Yap; Jo-Hannah S. Llamas; John Q. Wong; Joshua Gregor A. Dizon; Juan Antonio R. Magalang; Karol Sophia Agape R. Padilla; Kenneth M. Kim; Kris P. Punayan; Marc Edsel C. Ayes; Marc Jerrone R. Castro; Maria Rosario Singh-Vergeire and Cynthia P. Saloma; Maria Sofia L. Yangzon; Marissa Alejandria; Razel Nikka M. Hao; Rianna Patricia S. Cruz; Sheila Mae M. Araiza                                                         |
| EPI_ISL_2759188                                                                                                                                                                                                                                                                                                                                                                                                                                                                                                                                                                                                                                                                                                                                                                                                                                                                                                                                                                                                                                                                                                                                                                                                                                                                                                                                                              | Population Medicine and Diagnostic Sciences, Cornell University                                                 | Population Medicine and Diagnostic Sciences, Cornell University                                                                | Anderson; B.D.; Caserta; Cronk; D.G.; Diel; L.C.; Laverack, M.; Mitchell; P.K.; Plocharczyk, E.; R.R.; Venugopalan, R.                                                                                                                                                                                                                                                                                                                                                                                                                                                                                                                                                                                                                                                |
| EPI_ISL_2550758, EPI_ISL_2550759                                                                                                                                                                                                                                                                                                                                                                                                                                                                                                                                                                                                                                                                                                                                                                                                                                                                                                                                                                                                                                                                                                                                                                                                                                                                                                                                             | Port Dickson Hospital                                                                                           | Institute for Medical Research, Infectious Disease Research Centre, National Institutes of Health, Ministry of Health Malaysia | Azizan MA; Kamel K; Mohd Zawawi Z; Ramly N; Robert F; Suppiah J; Thayan R                                                                                                                                                                                                                                                                                                                                                                                                                                                                                                                                                                                                                                                                                             |
| EPI_ISL_712071                                                                                                                                                                                                                                                                                                                                                                                                                                                                                                                                                                                                                                                                                                                                                                                                                                                                                                                                                                                                                                                                                                                                                                                                                                                                                                                                                               | Port Elizabeth Provincial Hospital, National Health Laboratory Services, Eastern Cape, South Africa             | National Institute for Communicable Diseases of the National Health Laboratory Service                                         | Allam M; Bhiman JN; Ismail A; Mahlangu B; Mohale T; Ntuli N                                                                                                                                                                                                                                                                                                                                                                                                                                                                                                                                                                                                                                                                                                           |
| EPI_ISL_2188209                                                                                                                                                                                                                                                                                                                                                                                                                                                                                                                                                                                                                                                                                                                                                                                                                                                                                                                                                                                                                                                                                                                                                                                                                                                                                                                                                              | Prime Care Alpha Covid-19 Testing Laboratory                                                                    | Philippine Genome Center                                                                                                       | Alethea R. de Guzman; Anna Ong-Lim; Arianne A. Zamora; Asia Louisa U. Chong; Benedict A. Maralit; Candice Francheska B. Tambaoan; Carlo M. Lapid; Celia Carlos; Devon Ray Pacial; Edsel Maurice Salvaña; El King D. Morado; Elcid Aaron R. Pangilinan; Eva Maria Cutiongco-de la Paz; Francis A. Tablizo; Irish Coleen A. Asin; Jaime C. Montoya; Jan Michael C. Yap; Jo-Hannah S. Llamas; John Q. Wong; Joshua Gregor A. Dizon; Juan Antonio R. Magalang; Karol Sophia Agape R. Padilla; Kenneth M. Kim; Kris P. Punayan; Marc Edsel C. Ayes; Marc Jerrone R. Castro; Maria Rosario Singh-Vergeire and Cynthia P. Saloma; Maria Sofia L. Yangzon; Marissa Alejandria; Razel Nikka M. Hao; Rianna Patricia S. Cruz; Sheila Mae M. Araiza                              |
| EPI_ISL_1477046                                                                                                                                                                                                                                                                                                                                                                                                                                                                                                                                                                                                                                                                                                                                                                                                                                                                                                                                                                                                                                                                                                                                                                                                                                                                                                                                                              | Private clinic of Biogen Med, Tashkent, Uzbekistan                                                              | Center of Genomics and bioinformatics, Bioinformatics laboratory                                                               | Abdurakhmon N Yusupov; Ibromkhim Y Abdurakhmonov.; Mirzakamol S Ayubov; Mukhammadjon H Mirzakhmedov; Shukhrat E Shermatov; Zabardast T Buriev                                                                                                                                                                                                                                                                                                                                                                                                                                                                                                                                                                                                                         |
| EPI_ISL_1789673, EPI_ISL_1840246                                                                                                                                                                                                                                                                                                                                                                                                                                                                                                                                                                                                                                                                                                                                                                                                                                                                                                                                                                                                                                                                                                                                                                                                                                                                                                                                             | Pro-Vitam Diagnostics and Research Laboratory                                                                   | Pro-Vitam Diagnostics and Research Laboratory                                                                                  | Istvan Horvath; Kinga Rakosi; Monika Korodi; Szilard N. Fejer; Zsuzsanna Jenei                                                                                                                                                                                                                                                                                                                                                                                                                                                                                                                                                                                                                                                                                        |
| EPI_ISL_2259439                                                                                                                                                                                                                                                                                                                                                                                                                                                                                                                                                                                                                                                                                                                                                                                                                                                                                                                                                                                                                                                                                                                                                                                                                                                                                                                                                              | Providence Little Company of Mary Medical Center                                                                | Los Angeles County PHL                                                                                                         | P. Hemarajata et al.                                                                                                                                                                                                                                                                                                                                                                                                                                                                                                                                                                                                                                                                                                                                                  |
| EPI_ISL_2551452                                                                                                                                                                                                                                                                                                                                                                                                                                                                                                                                                                                                                                                                                                                                                                                                                                                                                                                                                                                                                                                                                                                                                                                                                                                                                                                                                              | Providence Regional Medical Center Everett                                                                      | Providence St. Joseph Health Molecular Genomics Laboratory                                                                     | Alexa K Dowdell; Brian D Piening; Carlo B Bifulco; Fred L Robinson; Mary Campbell; Rogan Rattray                                                                                                                                                                                                                                                                                                                                                                                                                                                                                                                                                                                                                                                                      |
| EPI_ISL_1908865, EPI_ISL_1909256, EPI_ISL_1909924                                                                                                                                                                                                                                                                                                                                                                                                                                                                                                                                                                                                                                                                                                                                                                                                                                                                                                                                                                                                                                                                                                                                                                                                                                                                                                                            | Provincial Public Health Reference Laboratory                                                                   | Provincial Public Health Reference Laboratory                                                                                  | ANDLEEB HANIF; Andleeb Hanif                                                                                                                                                                                                                                                                                                                                                                                                                                                                                                                                                                                                                                                                                                                                          |
| EPI_ISL_2543485                                                                                                                                                                                                                                                                                                                                                                                                                                                                                                                                                                                                                                                                                                                                                                                                                                                                                                                                                                                                                                                                                                                                                                                                                                                                                                                                                              | Provincial Public Health Reference Laboratory (PPHRL)                                                           | Provincial Public Health Reference Laboratory                                                                                  | ANDLEEB HANIF; MARIAM JAVED & HASSAN NAWAZ                                                                                                                                                                                                                                                                                                                                                                                                                                                                                                                                                                                                                                                                                                                            |
| EPI_ISL_2544198, EPI_ISL_2544508                                                                                                                                                                                                                                                                                                                                                                                                                                                                                                                                                                                                                                                                                                                                                                                                                                                                                                                                                                                                                                                                                                                                                                                                                                                                                                                                             | Provincial Public Health Reference Laboratory (PPHRL) P&SHD                                                     | Provincial Public Health Reference Laboratory (PPHRL) P&SHD                                                                    | ANDLEEB HANIF                                                                                                                                                                                                                                                                                                                                                                                                                                                                                                                                                                                                                                                                                                                                                         |
| EPI_ISL_1520298, EPI_ISL_1520315, EPI_ISL_1524143, EPI_ISL_1526698, EPI_ISL_1647753, EPI_ISL_2448726, EPI_ISL_2448846, EPI_ISL_2598497                                                                                                                                                                                                                                                                                                                                                                                                                                                                                                                                                                                                                                                                                                                                                                                                                                                                                                                                                                                                                                                                                                                                                                                                                                       | see above                                                                                                       | Public Health Authority of the Slovak Republic                                                                                 | Anna Gičová; Diana Rušňáková; Jakub Styk; Jaroslav Budiš; Miroslav Böhmer; Tatiana Sedláčková; Tomáš Szemes                                                                                                                                                                                                                                                                                                                                                                                                                                                                                                                                                                                                                                                           |
| EPI_ISL_2380140                                                                                                                                                                                                                                                                                                                                                                                                                                                                                                                                                                                                                                                                                                                                                                                                                                                                                                                                                                                                                                                                                                                                                                                                                                                                                                                                                              | Public Health Authority of the Slovak Republic                                                                  | Public Health Authority of the Slovak Republic                                                                                 | Anna Gičová; Barbora Kotvasová; Elena Tichá; Lucia Ševčíková; Miroslav Böhmer; Pavol Mišenko; Terézia Vrabířová; Tomáš Szemes                                                                                                                                                                                                                                                                                                                                                                                                                                                                                                                                                                                                                                         |
| EPI_ISL_2351056                                                                                                                                                                                                                                                                                                                                                                                                                                                                                                                                                                                                                                                                                                                                                                                                                                                                                                                                                                                                                                                                                                                                                                                                                                                                                                                                                              | Public Health Center 23 Siphraya                                                                                | Division of Genomic Medicine and Innovation support,Department of Medical Sciences, Ministry of Public Health, Thailand        | Archawin Rojanawitw; Jirapha Pakdee; Natthakul Bunneang; Nuanjun Wichukhinda; Penpitcha Thawong; Pilaluk Akkapaiboon Okada; Pundharika Piboonsiri; Surakameth Mahasirimongkol; Waritta Sawaengdee                                                                                                                                                                                                                                                                                                                                                                                                                                                                                                                                                                     |
| EPI_ISL_2351115, EPI_ISL_2351142                                                                                                                                                                                                                                                                                                                                                                                                                                                                                                                                                                                                                                                                                                                                                                                                                                                                                                                                                                                                                                                                                                                                                                                                                                                                                                                                             | Public Health Center 52 Samsennok                                                                               | Division of Genomic Medicine and Innovation support,Department of Medical Sciences, Ministry of Public Health, Thailand        | Archawin Rojanawitw; Jirapha Pakdee; Natthakul Bunneang; Nuanjun Wichukhinda; Penpitcha Thawong; Pilaluk Akkapaiboon Okada; Pundharika Piboonsiri; Surakameth Mahasirimongkol; Waritta Sawaengdee                                                                                                                                                                                                                                                                                                                                                                                                                                                                                                                                                                     |
| EPI_ISL_1112297, EPI_ISL_1112753                                                                                                                                                                                                                                                                                                                                                                                                                                                                                                                                                                                                                                                                                                                                                                                                                                                                                                                                                                                                                                                                                                                                                                                                                                                                                                                                             | Public Health Center of Ukraine                                                                                 | Charité Universitätsmedizin Berlin, Institute of Virology                                                                      | Barbara Mühlemann; Christian Drosten; Ihor Kuzin; Iryna Demchyshyna; Julia Schneider; Jörn Beheim-Schwarzbach; Liudmyla Chernenko; Roman Rodyna; Talitha Veith; Terry Jones; Victor M Corman                                                                                                                                                                                                                                                                                                                                                                                                                                                                                                                                                                          |
| EPI_ISL_2035726                                                                                                                                                                                                                                                                                                                                                                                                                                                                                                                                                                                                                                                                                                                                                                                                                                                                                                                                                                                                                                                                                                                                                                                                                                                                                                                                                              | Public Institution of Health Care "Diagnostic Center ( Laboratory Testing Center) of Moscow Health Department " | Group of Genomics and Postgenomic Technologies of Central Research Institute of Epidemiology                                   | Akimkin VG; Kaptelova VV; Kondrasheva LY; Korneenko EV; Nadtoka MI; Saenko SS; Samoilov AE; Smirnova YS; Spakova OG; Speranskaya AS; Tivanova EV                                                                                                                                                                                                                                                                                                                                                                                                                                                                                                                                                                                                                      |
| EPI_ISL_434542                                                                                                                                                                                                                                                                                                                                                                                                                                                                                                                                                                                                                                                                                                                                                                                                                                                                                                                                                                                                                                                                                                                                                                                                                                                                                                                                                               | Puerto Rico Department of Health                                                                                | Centers for Disease Control and Prevention, Dengue Branch                                                                      | Betzabel Flores; Chaney Kalinich; Fabiola Cruz; Gilberto A. Santiago; Glenda Gonzalez; Jessica I. Falcon; Jorge L. Munoz-Jordan; Joseph Fauver; Keyla Charriez; Nathan Grubaugh                                                                                                                                                                                                                                                                                                                                                                                                                                                                                                                                                                                       |
| EPI_ISL_1424758, EPI_ISL_1424786, EPI_ISL_1424816, EPI_ISL_1424838, EPI_ISL_1424839                                                                                                                                                                                                                                                                                                                                                                                                                                                                                                                                                                                                                                                                                                                                                                                                                                                                                                                                                                                                                                                                                                                                                                                                                                                                                          | Queensland Medical Laboratories                                                                                 | Melbourne Diagnostic Unit Public Health Laboratory (MDU-PHL)                                                                   | N.L.; Palou, T.; Seemann, T.; Sherry; Vaccher, S.                                                                                                                                                                                                                                                                                                                                                                                                                                                                                                                                                                                                                                                                                                                     |
| EPI_ISL_1424523, EPI_ISL_1424528, EPI_ISL_1424534, EPI_ISL_1424563, EPI_ISL_1424565, EPI_ISL_1424568, EPI_ISL_1424571, EPI_ISL_1424588, EPI_ISL_1424609, EPI_ISL_1424619, EPI_ISL_1424625                                                                                                                                                                                                                                                                                                                                                                                                                                                                                                                                                                                                                                                                                                                                                                                                                                                                                                                                                                                                                                                                                                                                                                                    | see above                                                                                                       | Queensland Medical Laboratories                                                                                                | N.L.; Palou, T.; Seemann, T.; Sherry; Vaccher, S.                                                                                                                                                                                                                                                                                                                                                                                                                                                                                                                                                                                                                                                                                                                     |
| EPI_ISL_2259251                                                                                                                                                                                                                                                                                                                                                                                                                                                                                                                                                                                                                                                                                                                                                                                                                                                                                                                                                                                                                                                                                                                                                                                                                                                                                                                                                              | Quest Diagnostics                                                                                               | Los Angeles County PHL                                                                                                         | P. Hemarajata et al.                                                                                                                                                                                                                                                                                                                                                                                                                                                                                                                                                                                                                                                                                                                                                  |
| EPI_ISL_498712, EPI_ISL_571572, EPI_ISL_937026                                                                                                                                                                                                                                                                                                                                                                                                                                                                                                                                                                                                                                                                                                                                                                                                                                                                                                                                                                                                                                                                                                                                                                                                                                                                                                                               | Quest Diagnostics                                                                                               | Quest Diagnostics                                                                                                              | Anderson, B.; D.F.; Gerasimova, A.; Grover, D.; Hua, M.; K.E.; Kagan; Lacbawan, F.; Liu Y.; Livingston; Owen, R.; R.M.; R.M. and Owen, R.; Rosenthal; S.H.; Shalhout                                                                                                                                                                                                                                                                                                                                                                                                                                                                                                                                                                                                  |
| EPI_ISL_1194304, EPI_ISL_1220518, EPI_ISL_1220603, EPI_ISL_1252990, EPI_ISL_1253022, EPI_ISL_1253029, EPI_ISL_1253394, EPI_ISL_1253515, EPI_ISL_1254018, EPI_ISL_1267467, EPI_ISL_1340714, EPI_ISL_1422462, EPI_ISL_1648208, EPI_ISL_1648249, EPI_ISL_1738201, EPI_ISL_1753041, EPI_ISL_1753105, EPI_ISL_1753145, EPI_ISL_1761938, EPI_ISL_1798071, EPI_ISL_1798096, EPI_ISL_1818187, EPI_ISL_1818383, EPI_ISL_1834352, EPI_ISL_1840480, EPI_ISL_1840498, EPI_ISL_1906045, EPI_ISL_1924396, EPI_ISL_1924786, EPI_ISL_1924930, EPI_ISL_1925063, EPI_ISL_1989753, EPI_ISL_1989865, EPI_ISL_1989866, EPI_ISL_1989961, EPI_ISL_2011131, EPI_ISL_2046851, EPI_ISL_2046943, EPI_ISL_2047029, EPI_ISL_2047254, EPI_ISL_2047528, EPI_ISL_2090484, EPI_ISL_2090489, EPI_ISL_2090542, EPI_ISL_2133258, EPI_ISL_2133308, EPI_ISL_2133309, EPI_ISL_2133312, EPI_ISL_2133434, EPI_ISL_2133436, EPI_ISL_2133456, EPI_ISL_2133475, EPI_ISL_2142939, EPI_ISL_2142947, EPI_ISL_2143008, EPI_ISL_2143023, EPI_ISL_2143064, EPI_ISL_2143096, EPI_ISL_2143329, EPI_ISL_2143359, EPI_ISL_2143363, EPI_ISL_2143449, EPI_ISL_2143679, EPI_ISL_2143750, EPI_ISL_2143921, EPI_ISL_2143986, EPI_ISL_2180479, EPI_ISL_2204104, EPI_ISL_2268965, EPI_ISL_2368037, EPI_ISL_2371936, EPI_ISL_2439373, EPI_ISL_2526761, EPI_ISL_2529125, EPI_ISL_2599725, EPI_ISL_2599745, EPI_ISL_2599854, EPI_ISL_2611845 | see above                                                                                                       | Quest Diagnostics Incorporated                                                                                                 |                                                                                                                                                                                                                                                                                                                                                                                                                                                                                                                                                                                                                                                                                                                                                                       |
| EPI_ISL_1087176, EPI_ISL_1139328                                                                                                                                                                                                                                                                                                                                                                                                                                                                                                                                                                                                                                                                                                                                                                                                                                                                                                                                                                                                                                                                                                                                                                                                                                                                                                                                             | Quest Diagnostics Incorporated                                                                                  | Respiratory Viruses Branch, Division of Viral Diseases, Centers for Disease Control and Prevention                             | A. Gerasimova; A. Perez; B. Anderson; Ben L. Rambo-Martin; Clinton R. Paden; Dakota Howard; Dhvani Batra; Duncan MacCannell; F. Lacbawan; I. A. Shlyakhter; K.E. Livingston; L.E. Bernstein; M. Hua; P. Tanpaiboon; Peter W. Cook; R. M. Kagan; R. Owen; R. V. Rolando; S. H. Rosenthal; Xuxiang Tong; Y. Liu                                                                                                                                                                                                                                                                                                                                                                                                                                                         |
| EPI_ISL_2284685                                                                                                                                                                                                                                                                                                                                                                                                                                                                                                                                                                                                                                                                                                                                                                                                                                                                                                                                                                                                                                                                                                                                                                                                                                                                                                                                                              | ROB FERREIRA LABORATORY                                                                                         | National Institute for Communicable Diseases of the National Health Laboratory Service                                         | Amoako DG; Bhiman JN; Ismail A; Mahlangu B; Mohale T; Ntuli N; Scheepers C                                                                                                                                                                                                                                                                                                                                                                                                                                                                                                                                                                                                                                                                                            |
| EPI_ISL_2348642, EPI_ISL_2348646                                                                                                                                                                                                                                                                                                                                                                                                                                                                                                                                                                                                                                                                                                                                                                                                                                                                                                                                                                                                                                                                                                                                                                                                                                                                                                                                             | Rakai Health Sciences Program                                                                                   | MRC/UVRI & LSHTM Uganda Research Unit                                                                                          | Charles Ssuuna; Dan Lule Bugembe; Matthew Cotten; My V.T. Phan; Pontiano Kaleebu; Ronald Moses Galiwango; Steven J Reynolds                                                                                                                                                                                                                                                                                                                                                                                                                                                                                                                                                                                                                                           |
| EPI_ISL_447025,                                                                                                                                                                                                                                                                                                                                                                                                                                                                                                                                                                                                                                                                                                                                                                                                                                                                                                                                                                                                                                                                                                                                                                                                                                                                                                                                                              | Ramathibodi Hospital                                                                                            | COVID-19 Network Investigations (CONI) Alliance                                                                                | Angkana Huang; Anthony R. Jones; Arporn Wangwiwatsin; Bhakbhoom Panthan; Chonticha Klungtong; Duangkamon Loesbanluechai; Ekawat Pasomsub; Elizabeth Batty; Insee Sensorin; Janjira Thaipadungpanit; Khajohn Joonlasak; Khajohn Joonalak; Kingkan                                                                                                                                                                                                                                                                                                                                                                                                                                                                                                                      |

|                                                                                                                                                                                                                                                                                                                                                                     |                                                                                                                       |                                                                                                                          |                                                                                                                                                                                                                                                                                                                                                                                                                                                                                                                                                                                                                                                                                                              |
|---------------------------------------------------------------------------------------------------------------------------------------------------------------------------------------------------------------------------------------------------------------------------------------------------------------------------------------------------------------------|-----------------------------------------------------------------------------------------------------------------------|--------------------------------------------------------------------------------------------------------------------------|--------------------------------------------------------------------------------------------------------------------------------------------------------------------------------------------------------------------------------------------------------------------------------------------------------------------------------------------------------------------------------------------------------------------------------------------------------------------------------------------------------------------------------------------------------------------------------------------------------------------------------------------------------------------------------------------------------------|
| EPI_ISL_1073958,<br>EPI_ISL_1138844,<br>EPI_ISL_1491555                                                                                                                                                                                                                                                                                                             |                                                                                                                       |                                                                                                                          | Rakmanee; Krittikorn Kumpornsin; Namfon Kotanan; Stefan Fernandez; Thanat Chookajorn; Theerarat Kochakarn; Treewat Watthanachockchai; Wasun Chantratita; Wudtichai Manasatienkij                                                                                                                                                                                                                                                                                                                                                                                                                                                                                                                             |
| EPI_ISL_1806953, EPI_ISL_1912766, EPI_ISL_1912771, EPI_ISL_1912782, EPI_ISL_2022507, EPI_ISL_2022525, EPI_ISL_2022578                                                                                                                                                                                                                                               | see above                                                                                                             | Randex Laboratories                                                                                                      | Wellcome Sanger Institute for the COVID-19 Genomics UK (COG-UK) Consortium                                                                                                                                                                                                                                                                                                                                                                                                                                                                                                                                                                                                                                   |
| EPI_ISL_2473913,<br>EPI_ISL_2662287                                                                                                                                                                                                                                                                                                                                 |                                                                                                                       | Reditus Laboratories                                                                                                     | Reditus Laboratories                                                                                                                                                                                                                                                                                                                                                                                                                                                                                                                                                                                                                                                                                         |
| EPI_ISL_1942265                                                                                                                                                                                                                                                                                                                                                     | Regional Authority of Public Health Banská Bystrica Slovakia                                                          | SVFI, Veterinary institute in Zvolen, Slovakia                                                                           | Dirbáková Z.; Mancoš M.; Madarová L.; Mojiš M.; Mokryšová S.; Strhársky J.; Sujová S.; Tinák M.                                                                                                                                                                                                                                                                                                                                                                                                                                                                                                                                                                                                              |
| EPI_ISL_2433518                                                                                                                                                                                                                                                                                                                                                     | Regional Medical Sciences Center 1/1 Chiangrai                                                                        | Division of Genomic Medicine and Innovation support, Department of Medical Sciences, Ministry of Public Health, Thailand | Archawin Rojanawiwat; Jirapha Pakdee; Natthakul Bunneang; Nuanjun Wichukhinda; Penpitha Thawong; Pilailuk Akkapaiboon Okada; Pundharika Piboonsiri; Surakameth Mahasirimongkol; Waritta Sawaengdee                                                                                                                                                                                                                                                                                                                                                                                                                                                                                                           |
| EPI_ISL_768537                                                                                                                                                                                                                                                                                                                                                      | Regional Medical Sciences Center 5 Samut Songkhram                                                                    | National Institute of Health, Department of Medical Sciences, Ministry of Public Health, Thailand                        | ; Natchaya Khadsang; Pakorn Piromtong; Pilailuk Okada; Ratana Tacharoenmuang; Siripaporn Phuyugun; Sittiporn Parmmen; Sunthareeya Waicharoen; Thanutsapa Thanadachakul; Warawan Wongboot; sirikanda wimol                                                                                                                                                                                                                                                                                                                                                                                                                                                                                                    |
| EPI_ISL_708737                                                                                                                                                                                                                                                                                                                                                      | Regional medical sciences center 6 chonburi                                                                           | National Institute of Health, Department of Medical Sciences, Ministry of Public Health, Thailand                        | Malinee Chittaganpitch; Pilailuk Okada; Siripaporn Phuyugun; Sittiporn Parmmen; Sunthareeya Waicharoen; Thanutsapa Thanadachakul; Warawan Wongboot                                                                                                                                                                                                                                                                                                                                                                                                                                                                                                                                                           |
| EPI_ISL_1394032                                                                                                                                                                                                                                                                                                                                                     | Regionalne Centrum Kwioldawstwa i Kwiolcznictwa w Białymstoku Pracownia Diagnostyki Molekularnej wirusa SARS-CoV-2    | 1. National Institute of Public Health - National Institute of Hygiene; 2. Eurofins Genomics Europe Sequencing GmbH      | ECDC COVID-19 WGS support team; Eurofins Genomics Europe Sequencing Team; Gierczyński Rafał; Sadkowska-Todys Małgorzata; Wolkowicz Tomasz; Zacharczuk Katarzyna                                                                                                                                                                                                                                                                                                                                                                                                                                                                                                                                              |
| EPI_ISL_2155223                                                                                                                                                                                                                                                                                                                                                     | Research Institute for Tropical Medicine, Inc. (RITM)                                                                 | Philippine Genome Center                                                                                                 | Althea R. de Guzman; Anna Ong-Lim; Arianne A. Zamora; Asia Louisa U. Chong; Benedict A. Maralit; Candice Francheska B. Tambaoan; Carlo M. Lapid; Celia Carlos; Devon Ray Pacial; Edsel Maurice Salvaña; El King D. Morado; Eva Maria Cutiongco-de la Paz; Francis A. Tablizo; Irish Coleen A. Asin; Jaime C. Montoya; Jan Michael C. Yap; Jo-Hannah S. Llamas; John Q. Wong; Joshua Gregor A. Dizon; Juan Antonio R. Magalang; Karol Sophia Agape R. Padilla; Kenneth M. Kim; Kris P. Punayan; Marc Edsel C. Ayes; Marc Jerone R. Castro; Maria Rosario Singh-Vergeire and Cynthia P. Saloma; Maria Sofia L. Yangzon; Marissa Alejandria; Razel Nikka M. Hao; Rianara Patricia S. Cruz; Shella Mae M. Araiza |
| EPI_ISL_2544702,<br>EPI_ISL_2544703,<br>EPI_ISL_2544707,<br>EPI_ISL_2544708,<br>EPI_ISL_2544712,<br>EPI_ISL_2544713                                                                                                                                                                                                                                                 | Research Center for Emerging Viral Infections, Chang Gung University, Taiwan                                          | Research Center for Emerging Viral Infections, Chang Gung University, Taiwan                                             | Carol Wang; Chung-Guei Huang; Hsiao-Chen Tu; Hui-Ying Weng; Hung-Yu Shu; Jason Su; Jora Lin; Kuo-Ming Lee; Po-Wei Huang; Pocky Lai; Shih-Feng Tsai; Shin-Ru Shih; Shu-Li Yang; Tsu-Lan Wu; Yu-Nong Gong; Yung-Feng Lin                                                                                                                                                                                                                                                                                                                                                                                                                                                                                       |
| EPI_ISL_2748530                                                                                                                                                                                                                                                                                                                                                     | Respiratory Virus Unit, Microbiology Services Colindale, Public Health England                                        | COVID-19 Genomics UK (COG-UK) Consortium                                                                                 | PHE Covid Sequencing Team                                                                                                                                                                                                                                                                                                                                                                                                                                                                                                                                                                                                                                                                                    |
| EPI_ISL_2106001,<br>EPI_ISL_2106013,<br>EPI_ISL_2106069,<br>EPI_ISL_2254398                                                                                                                                                                                                                                                                                         | Respiratory Viruses Branch, Centers for Disease Control and Prevention                                                | Respiratory Viruses Branch, Centers for Disease Control and Prevention                                                   | Baker; Bakhsh; Batra, D.; Breit, N.; C.R.; Campbell, P.; Caravas, J.; Case, R.; Clark, C.; Cook; Ellis, S.; Ghorpade, V.; Greninger, A.; Gulvick, C.; Hardison, M.; Houdeshell, H.; Howard, D.; Huang; Jerome; K.R.; Kvalvaag, O.; Lin, M.; Livingston; M.-L.; M.S.; MacCannell, D.; Mathias, P.; Morrison, S.; Moser, K.; N.R.; Nail, D.; Nguyen; P.W.; Paden; Paskey, A.; Perez, R.; R.J.; Rambo-Martin, B.; Roychoudhury; S.M.; Sammons, S.; Sanders, E.; Schmeer, M.; Shrestha, L.; T.V.; Unoarumhi, Y.; Vest, A.; Wagner, D.; Westlund, S.; Xie, H.                                                                                                                                                     |
| EPI_ISL_2621615                                                                                                                                                                                                                                                                                                                                                     | Respiratory Viruses Branch, US Centers for Disease Control and Prevention                                             | Respiratory Viruses Branch, US Centers for Disease Control and Prevention                                                | Batra, D.; Burroughs, M.; C.R.; Colalter, T.; Cook, P.; Davis, M.; H.J.J.; Kelleher, A.; Lee, J.; Li, Y.; Lynch, B.; Marine, R.; Ng; Nobles, S.; Paden; Padilla, J.; Queen, K.; Retchless, A.; Sheth, M.; Tao, Y.; Tong, S.; Uehara, A.; Wang, H.; Zhang, J.                                                                                                                                                                                                                                                                                                                                                                                                                                                 |
| EPI_ISL_1253986,<br>EPI_ISL_1407397,<br>EPI_ISL_2016594,<br>EPI_ISL_2133866                                                                                                                                                                                                                                                                                         | Rhode Island Department of Health                                                                                     | Infectious Disease Program, Broad Institute of Harvard and MIT                                                           | Adams, G.; Azevedo, K.; B.L.; B.W.; Bauer, M.; Birren; Carter, A.; Chaluvasi, S.; D.J.; DeRuff, K.; Gallagher, G.; Gladden-Young, A.; Huard, R.; J.E.; K.J.; King, E.; Lagerberg, K.; Lemieux; Loreth, C.; MacInnis; Miller, A.; Normandin, E.; P.C.; Park; Pearlman, L.; Reilly, S.; Rudy, M.; Sabeti; Siddie; Smole, S.; Tomkins-Tinch, C.; and MacInnis; and Sabeti                                                                                                                                                                                                                                                                                                                                       |
| EPI_ISL_491298                                                                                                                                                                                                                                                                                                                                                      | Rural Health Unit - Calauan, Laguna                                                                                   | Research Institute for Tropical Medicine                                                                                 | Bautista; Bruncker, K.; C.S.; C.T.D.; Demetria; E.S.; F.G.M.; I.A.P.; M.A.A.; Manalo; Medado; Mercado; O.J.T.; Onza; Polotan; Tujan                                                                                                                                                                                                                                                                                                                                                                                                                                                                                                                                                                          |
| EPI_ISL_1272759                                                                                                                                                                                                                                                                                                                                                     | SC Dept of Health and Env. Control-Bureau of Laboratories                                                             | Centers for Disease Control and Prevention Division of Viral Diseases, Pathogen Discovery                                | Anna Montmayeur; Anna Uehara; Ben L. Rambo-Martin; Clinton R. Paden; Dhvani Batra; Halbin Wang; Jasmine Padilla; Jing Zhang; Justin Lee; Katie Dillon; Krista Queen; Kristen Knipe; Kristine Lacey; Lori Rowe; Mark Burroughs; Matthew Schmeer; Mili Sheth; Peter W. Cook; Rachel Marine; Sam Shepard; Sarah Nobles; Shoshona Le; Suxiang Tong; Yan Li; Ying Tao                                                                                                                                                                                                                                                                                                                                             |
| EPI_ISL_2695238                                                                                                                                                                                                                                                                                                                                                     | SESARAM                                                                                                               | Instituto Nacional de Saude (INSA)                                                                                       | Borges et al                                                                                                                                                                                                                                                                                                                                                                                                                                                                                                                                                                                                                                                                                                 |
| EPI_ISL_2105766, EPI_ISL_2231022, EPI_ISL_2603801, EPI_ISL_2603805, EPI_ISL_2603812, EPI_ISL_2616785, EPI_ISL_2616845, EPI_ISL_2616851, EPI_ISL_2616859, EPI_ISL_2616864, EPI_ISL_2616874, EPI_ISL_2616879, EPI_ISL_2616937, EPI_ISL_2616953, EPI_ISL_2616966, EPI_ISL_2616986, EPI_ISL_2692733                                                                     | see above                                                                                                             | Salud Digna                                                                                                              | Abraham Campos-Romero; Cedro-Tanda A; Escobar-Arrazola; Gonzalez-Barrera D; Herrera-Montalvo LA.; Hidalgo-Miranda A; Luna-Ruiz Marco; M; Mendoza-Vargas A; Moreno-Camacho José Luis; Munguia-Garza P; Ramirez-Vega O; Rangel-DeLeon D; Reyes-Grajeda JP; Rodriguez-Gallegos Jorge                                                                                                                                                                                                                                                                                                                                                                                                                            |
| EPI_ISL_750169,<br>EPI_ISL_750171,<br>EPI_ISL_750172,<br>EPI_ISL_751011                                                                                                                                                                                                                                                                                             | Sanatorio Americano                                                                                                   | Institut Pasteur de Montevideo                                                                                           | Ana Carolina Mendonça; Andrés Lizasoain; Camila Simoes; Cecilia Alonso; Cecilia Salazar; Daiana Mir; Fernando López-Tort; Fernando Motta; Gonzalo Bello; Ighor Arantes; Ignacio Ferrés; Jose Sotelo; Leticia Maya; Leticia Garay Martins; Luciana Appolinario; Lucia Spangenberg; Mailen Arto; Mariana Brandes; Marilda Mendonça Siqueira; Marilda Tereza Mar da Rosa; Maria José Benitez-Galeano; Martín Graña; Matias Castells; Matias Salvo; Natalia Rego; Natalia Reyes; Pablo Smirich; Paola Cristina Resende; Rodney Colina; Tamara Fernandez-Calero; Tania Possi; Tatiana Schäffer Gregianini; Verónica Noya; Yasser Vega                                                                             |
| EPI_ISL_738611, EPI_ISL_1529221, EPI_ISL_2341495, EPI_ISL_2341560, EPI_ISL_2341641, EPI_ISL_2500033, EPI_ISL_2500136                                                                                                                                                                                                                                                | see above                                                                                                             | Santa Clara County Public Health Laboratory                                                                              | CZB Clichub Consortium                                                                                                                                                                                                                                                                                                                                                                                                                                                                                                                                                                                                                                                                                       |
| EPI_ISL_2658987, EPI_ISL_2658993, EPI_ISL_2658999, EPI_ISL_2659011, EPI_ISL_2659023, EPI_ISL_2659027, EPI_ISL_2659045, EPI_ISL_2659046, EPI_ISL_2659048, EPI_ISL_2659079, EPI_ISL_2659090, EPI_ISL_2659099, EPI_ISL_2659101, EPI_ISL_2691231, EPI_ISL_2691232, EPI_ISL_2691239, EPI_ISL_2691249, EPI_ISL_2691268, EPI_ISL_2691273, EPI_ISL_2691282, EPI_ISL_2774577 | see above                                                                                                             | Santa Clara Valley Medical Center                                                                                        | Santa Clara County Public Health Department                                                                                                                                                                                                                                                                                                                                                                                                                                                                                                                                                                                                                                                                  |
| EPI_ISL_661189                                                                                                                                                                                                                                                                                                                                                      | Scientific Veterinary Institute Novi Sad                                                                              | Veterinary Specialized Institute "Kraljevo", Serbia                                                                      | Afonso, C.; Banovic Djeri, B.; Jankovic, M.; Jovanovic, T.; Knezevic, A.; Petrovic, T.; Sekler, M.; Tesovic, B.; Vidanovic, D.; Volkening, J.                                                                                                                                                                                                                                                                                                                                                                                                                                                                                                                                                                |
| EPI_ISL_1794936                                                                                                                                                                                                                                                                                                                                                     | Scripps Medical Laboratory                                                                                            | Andersen lab at Scripps Research                                                                                         | Ellen Stefanski; Ian Mchardy; SEARCH Alliance San Diego with Michael Quigley                                                                                                                                                                                                                                                                                                                                                                                                                                                                                                                                                                                                                                 |
| EPI_ISL_2011443,<br>EPI_ISL_2011445,<br>EPI_ISL_2489992,<br>EPI_ISL_2490014                                                                                                                                                                                                                                                                                         | Seattle Flu Study                                                                                                     | Seattle Flu Study                                                                                                        | Amanda Adler; Barry R. Lutz; Benjamin Pelle; Caitlin R. Wolf; Chris D. Frazier; Deborah A. Nickerson; Elisabeth Brandstetter; Erica Ryke; Helen Y. Chu; Janet A. Englund; Jay Shendure; Jeff Duchin; Jover Lee; Kairsten Fay; Karen Cowgill; Kirsten Lacombe; Lea M. Starita; Mark J. Rieder; Matthew Richardson; Matthew Thompson; Melissa Truong; Michael Boeckh; Michael Famulare; Misja Ilcisin; Peter D. Han; Stephanie Schrag; Thomas R. Sibley; Trevor Bedford                                                                                                                                                                                                                                        |
| EPI_ISL_1393370,<br>EPI_ISL_1745589,<br>EPI_ISL_2133041,<br>EPI_ISL_2516852,<br>EPI_ISL_2516895,<br>EPI_ISL_2516908                                                                                                                                                                                                                                                 | Servicio de Microbiología Clínica (Complejo Hospitalario de Navarra, Pamplona)                                        | Centro de Secuenciación NASERTIC                                                                                         | Ana Miqueleiz; Ana Navascués; Carmen Ezpeleta Baquedano                                                                                                                                                                                                                                                                                                                                                                                                                                                                                                                                                                                                                                                      |
| EPI_ISL_1589626                                                                                                                                                                                                                                                                                                                                                     | Servicio de Microbiología, Hospital Miguel Servet, Zaragoza                                                           | SeqCOVID-SPAIN consortium/IBV(CSIC)                                                                                      | Alexander Tristanchó Baró; Ana Milagro; Antonio Rezusta López; Nieves Martínez Cameo and SeqCOVID-SPAIN consortium; Yolanda Gracia Gataloup                                                                                                                                                                                                                                                                                                                                                                                                                                                                                                                                                                  |
| EPI_ISL_1786039,<br>EPI_ISL_1786057                                                                                                                                                                                                                                                                                                                                 | Servicio de Microbiología, Hospital Universitario Central de Asturias                                                 | SeqCOVID-SPAIN consortium/IBV(CSIC)                                                                                      | Cristián Castelló Abietar; Jose A. Boga; Marta Elena Álvarez-Argüelles; Santiago Melón and SeqCOVID-SPAIN consortium; Susana Rojo-Alba                                                                                                                                                                                                                                                                                                                                                                                                                                                                                                                                                                       |
| EPI_ISL_1014721                                                                                                                                                                                                                                                                                                                                                     | Servicio de Microbiología. Hospital Ramón y Cajal. (CIBERESP)                                                         | SeqCOVID-SPAIN consortium/IBV(CSIC)                                                                                      | Jose Mª González-Alba; Juan C. Galán and SeqCOVID-SPAIN consortium; L. Olavarrieta; Val Fernández                                                                                                                                                                                                                                                                                                                                                                                                                                                                                                                                                                                                            |
| EPI_ISL_2491679                                                                                                                                                                                                                                                                                                                                                     | Servizo de Microbioloxía. Complexo Hospitalario de Santiago de Compostela                                             | Servizo de Microbioloxía. Complexo Hospitalario de Santiago de Compostela                                                | Amparo Coira; Antonio Aguilera; Carlos García-Riestra; Daniel Navarro; Gema Barbeito; Iría Roca; José Llovo; Laura Millán; Manuela Hernández; María Luisa Pérez_del_Molino; Mercedes Treviño; Rocío trastoy; Teresa Lopez_Valiño; Xosé Costa                                                                                                                                                                                                                                                                                                                                                                                                                                                                 |
| EPI_ISL_2231198<br>EPI_ISL_582662                                                                                                                                                                                                                                                                                                                                   | Sharp HealthCare Laboratory<br>Sheikh Khalifa Medical City                                                            | Andersen lab at Scripps Research<br>Molecular/Surveillance lab Sheikh Khalifa Medical City                               | Art Mendoza; Cathy Woerle; Jacquelyn Berumen; Liam McGinnis; Omid Bakhtar; SEARCH Alliance San Diego with Aaron Harding<br>Amritharaj Francis; Hala Imambaccus; Hiba Saud; Sahar Almarzoqi; Sajeed Abdul; Stefan Weber                                                                                                                                                                                                                                                                                                                                                                                                                                                                                       |
| EPI_ISL_583896,<br>EPI_ISL_1969690,<br>EPI_ISL_2566445                                                                                                                                                                                                                                                                                                              | Singapore General Hospital                                                                                            | Department of Microbiology                                                                                               | Chayaporn Suphavilai; Chenhao Li; James Sim Heng Chiak; Karrie Ko; Kenneth Xin Long Chan; Kern Rei Chng; Kian Sing Chan; Kun Lee Lim; Lynette Oon; Niranjan Nagarajan; Nurdyana Abdul Rahman; Sui Sin Goh; Suphavilai Chayaporn                                                                                                                                                                                                                                                                                                                                                                                                                                                                              |
| EPI_ISL_407987                                                                                                                                                                                                                                                                                                                                                      | Singapore General Hospital                                                                                            | Programme in Emerging Infectious Diseases, Duke-NUS Medical School                                                       | Danielle E Anderson; Gavin JD Smith; Jayanthi Jayakumar; Jenny GH Low; Kian Sing Chan; Linfa Wang; Lynette LE Oon; Martin Linster; Yan Zhuang; Yvonne CF Su                                                                                                                                                                                                                                                                                                                                                                                                                                                                                                                                                  |
| EPI_ISL_1761811<br>EPI_ISL_1253663                                                                                                                                                                                                                                                                                                                                  | Sonora Quest Laboratories<br>South Dakota Public Health Laboratory                                                    | TGen North<br>South Dakota Public Health Laboratory                                                                      | "Jolene Bowers; Ashlyn Pfeiffer; Chris French; Darrin Lemmer; Dave Engelthaler; Hayley Yaglom; Heather Centner; The Arizona COVID Genomics Union (ACGU)"<br>Jacob Garfin and Chris Carlson                                                                                                                                                                                                                                                                                                                                                                                                                                                                                                                   |
| EPI_ISL_1017040<br>EPI_ISL_1307682                                                                                                                                                                                                                                                                                                                                  | South Dakota Public Health Laboratory<br>South Dakota Public Health Laboratory, South Dakota Department of Health     | University of Minnesota Genomics Center<br>South Dakota Public Health Laboratory, South Dakota Department of Health      | Benjamin Auch; Corbin Dirks; Daryl M. Gohl; Jaquelyn Kuriger-Laber; John Garbe; and Chris Carlson<br>C. and Garfin, J.; Carlson                                                                                                                                                                                                                                                                                                                                                                                                                                                                                                                                                                              |
| EPI_ISL_456238                                                                                                                                                                                                                                                                                                                                                      | Southern Community Labs Dunedin                                                                                       | Institute of Environmental Science and Research (ESR)                                                                    | Anja Werno; Antje van der Linden; Arlo Upton; Chris Mansell; David Hammer; Dragana Drinkovic; Erasmus Smit; Gary McAuliffe; Hana Sofia Andersson; James Ussher; Jill Sherwood; Joep de Ligt; Josh Freeman; Julia Howard; Juliet Elvy; Lauren Jelly; Mary DeAlmeida; Matt Blakiston; Matt Storey; Matthew Rogers; Max Bloomfield; Michael Addidie; Michelle Balm; Sally Roberts; Sarah Jefferies; Sharmini Muttaiyah; Susan Morpeth; Susan Taylor; Timothy Blackmore; Vani Sathendran; Veronica Playle; Virginia Hope; Xiaoyun Ren                                                                                                                                                                            |
| EPI_ISL_2230722<br>EPI_ISL_1495113,<br>EPI_ISL_1495132                                                                                                                                                                                                                                                                                                              | Southern Nevada Public Health Laboratory<br>State Institution «Public Health Center of Ministry of Health of Ukraine» | Southern Nevada Public Health Laboratory<br>Robert Koch Institute, ZBS1 Highly Pathogenic Viruses, Berlin, Germany       | Michael Picker<br>Andreas Nitsche; Annika Brinkmann; Iryna Demchyshyna; Janine Michel; Liudmyla Chernenko; Roman Rodyna; Steven Uddin                                                                                                                                                                                                                                                                                                                                                                                                                                                                                                                                                                        |

|                                                                                                                                                                                                                                                                                                                                                                                                                                                                                                                                                                                                                                                                                                        |                                                                                                                                              |                                                                                                                                                  |                                                                                                                                                                                                                                                                                                                                                                                                                                                                                                                                                                                                                                                                                                                                               |                                                                                                                                                                                                                                                                                                                                                                                                   |
|--------------------------------------------------------------------------------------------------------------------------------------------------------------------------------------------------------------------------------------------------------------------------------------------------------------------------------------------------------------------------------------------------------------------------------------------------------------------------------------------------------------------------------------------------------------------------------------------------------------------------------------------------------------------------------------------------------|----------------------------------------------------------------------------------------------------------------------------------------------|--------------------------------------------------------------------------------------------------------------------------------------------------|-----------------------------------------------------------------------------------------------------------------------------------------------------------------------------------------------------------------------------------------------------------------------------------------------------------------------------------------------------------------------------------------------------------------------------------------------------------------------------------------------------------------------------------------------------------------------------------------------------------------------------------------------------------------------------------------------------------------------------------------------|---------------------------------------------------------------------------------------------------------------------------------------------------------------------------------------------------------------------------------------------------------------------------------------------------------------------------------------------------------------------------------------------------|
| EPI_ISL_752910, EPI_ISL_1771435, EPI_ISL_2007889, EPI_ISL_2007931                                                                                                                                                                                                                                                                                                                                                                                                                                                                                                                                                                                                                                      | State Laboratories Division, Hawaii State Department of Health                                                                               | State Laboratories Division, Hawaii State Department of Health                                                                                   | Ayana Garnet; Drew Kuwazaki; Edward Desmond; Pamela O'Brien; Razvan Sultana; Sabrina Diemert                                                                                                                                                                                                                                                                                                                                                                                                                                                                                                                                                                                                                                                  |                                                                                                                                                                                                                                                                                                                                                                                                   |
| EPI_ISL_2377955, EPI_ISL_2377967, EPI_ISL_2378174, EPI_ISL_2378500, EPI_ISL_2473486                                                                                                                                                                                                                                                                                                                                                                                                                                                                                                                                                                                                                    | State Testing Facility                                                                                                                       | Altius Institute for Biomedical Research                                                                                                         | Alex Isner; Alex Nguyen; Amanda Gale; Audra Johnson; Clem Green; Daniel Bates; Eric Thorland; Jacob Rodriguez; Jean Robinson; Jemma Nelson; Jessica Kunder; John Stamatoyannopoulos; Joshua Richards; Julia Wald; Kneshay Harper; Lauren Mitchell; Mark Frerker; Matt Hartman; Michael Buckley; Muhammad Halimun; Rebecca Bruders; Sadie Patraw; Sofia Olsson; Tobias Ragoczy                                                                                                                                                                                                                                                                                                                                                                 |                                                                                                                                                                                                                                                                                                                                                                                                   |
| EPI_ISL_491038                                                                                                                                                                                                                                                                                                                                                                                                                                                                                                                                                                                                                                                                                         | Suceava County Emergency Hospital                                                                                                            | "Stefan cel Mare" University Metagenomics Lab                                                                                                    | Antoniadis Panagiotis et al.; Lobiuc Andrei                                                                                                                                                                                                                                                                                                                                                                                                                                                                                                                                                                                                                                                                                                   |                                                                                                                                                                                                                                                                                                                                                                                                   |
| EPI_ISL_2091020                                                                                                                                                                                                                                                                                                                                                                                                                                                                                                                                                                                                                                                                                        | Sungai Buloh Hospital                                                                                                                        | Institute for Medical Research, Infectious Disease Research Centre, National Institutes of Health, Ministry of Health Malaysia                   | Azizan MA; Kamel K; Mohd Zawawi Z; Ramly N; Robert F; Suppiah J; Thayan R                                                                                                                                                                                                                                                                                                                                                                                                                                                                                                                                                                                                                                                                     |                                                                                                                                                                                                                                                                                                                                                                                                   |
| EPI_ISL_1290037, EPI_ISL_1290502, EPI_ISL_1420162, EPI_ISL_1604490, EPI_ISL_1676013, EPI_ISL_1808683, EPI_ISL_1808686, EPI_ISL_1899297, EPI_ISL_2032727, EPI_ISL_2033405, EPI_ISL_2033751, EPI_ISL_2034582, EPI_ISL_2034589, EPI_ISL_2205752, EPI_ISL_2205865, EPI_ISL_2206097, EPI_ISL_2208933, EPI_ISL_2209223, EPI_ISL_2211302, EPI_ISL_2217152, EPI_ISL_2220962, EPI_ISL_2257706, EPI_ISL_2411664, EPI_ISL_2415484, EPI_ISL_2416022, EPI_ISL_2418605, EPI_ISL_2418674, EPI_ISL_2419245, EPI_ISL_2419511, EPI_ISL_2583831, EPI_ISL_2613551, EPI_ISL_2619254, EPI_ISL_2619266, EPI_ISL_2619267, EPI_ISL_2619585, EPI_ISL_2619703, EPI_ISL_2620486, EPI_ISL_2793590, EPI_ISL_2793828, EPI_ISL_2793845 | see above                                                                                                                                    | Swedish national genomic surveillance program of SARS-CoV-2                                                                                      | The Public Health Agency of Sweden                                                                                                                                                                                                                                                                                                                                                                                                                                                                                                                                                                                                                                                                                                            | Alma Brolund; Maria Lind Karlberg; Maximilian Riess; Swedish national genomic surveillance program of SARS-CoV-2                                                                                                                                                                                                                                                                                  |
| EPI_ISL_2695522                                                                                                                                                                                                                                                                                                                                                                                                                                                                                                                                                                                                                                                                                        | TAMBO MEMORIAL                                                                                                                               | National Institute for Communicable Diseases of the National Health Laboratory Service                                                           | Amoako DG; Bhiman JN; Everatt J; Ismail A; Mahlangu B; Mnguni A; Mohale T; Ntuli N; Scheepers C                                                                                                                                                                                                                                                                                                                                                                                                                                                                                                                                                                                                                                               |                                                                                                                                                                                                                                                                                                                                                                                                   |
| EPI_ISL_1392534                                                                                                                                                                                                                                                                                                                                                                                                                                                                                                                                                                                                                                                                                        | TGen North                                                                                                                                   | TGen North                                                                                                                                       | "Jolene Bowers; Ashlyn Pfeiffer; Chris French; Darrin Lemmer; Dave Engelthaler; Hayley Yaglom; Heather Centner; The Arizona COVID Genomics Union (ACGU)"                                                                                                                                                                                                                                                                                                                                                                                                                                                                                                                                                                                      |                                                                                                                                                                                                                                                                                                                                                                                                   |
| EPI_ISL_2156302                                                                                                                                                                                                                                                                                                                                                                                                                                                                                                                                                                                                                                                                                        | THE LORD'S GRACE MEDICAL AND INDUSTRIAL CLINIC                                                                                               | Philippine Genome Center                                                                                                                         | Alethea R. de Guzman; Anna Ong-Lim; Arianne A. Zamora; Asia Louisa U. Chong; Benedict A. Maralit; Candice Francheska B. Tambaoan; Carlo M. Lapid; Celia Carlos; Devon Ray Pacial; Edsel Maurice Salvaña; El King D. Morado; Elcid Aaron R. Pangilinan; Eva Maria Cutiongco-de la Paz; Francis A. Tablizo; Irish Coleen A. Asin; Jaime C. Montoya; Jan Michael C. Yap; Jo-Hannah S. Llamas; John Q. Wong; Joshua Gregor A. Dizon; Juan Antonio R. Magalang; Karol Sophia Agape R. Padilla; Kenneth M. Kim; Kris P. Punayan; Marc Edsel C. Ayes; Marc Jerrone R. Castro; Maria Rosario Singh-Vergeire and Cynthia P. Saloma; Maria Sofia L. Yanzgon; Marissa Alejandria; Razel Nikka M. Hao; Rianna Patricia S. Cruz; Sheila Mae M. Araiza      |                                                                                                                                                                                                                                                                                                                                                                                                   |
| EPI_ISL_427395                                                                                                                                                                                                                                                                                                                                                                                                                                                                                                                                                                                                                                                                                         | TSGH-CP molecular lab                                                                                                                        | TSGH-CP molecular lab                                                                                                                            | Cherng-Lih Perng; Chien-Wen Chen; Chih-Kai Chang; Feng-Yee Chang; Hsing-Yi Chung; Hung-Sheng Shang; Jung-Chung Lin; Kuo-Ming Yeh; Kuo-Sheng Hung; Ming-Jr Jian; Sheng-Kang Chiu; Shih-Hung Tsai; Tien-Yao Chang                                                                                                                                                                                                                                                                                                                                                                                                                                                                                                                               |                                                                                                                                                                                                                                                                                                                                                                                                   |
| EPI_ISL_2141442, EPI_ISL_2177412, EPI_ISL_2443304, EPI_ISL_2443319                                                                                                                                                                                                                                                                                                                                                                                                                                                                                                                                                                                                                                     | TXDSHS                                                                                                                                       | TXDSHS                                                                                                                                           | Anita Pokharel; Bonnie Oh; Chun Wang; Grace Kubin; Jenny Zhang; Karen Bobier; Lorraine Rodriguez; Maliha Rahman; Mayela Pedrueza; Myong Koag; Rachel Lee; Rashmi Tuladhar                                                                                                                                                                                                                                                                                                                                                                                                                                                                                                                                                                     |                                                                                                                                                                                                                                                                                                                                                                                                   |
| EPI_ISL_411926                                                                                                                                                                                                                                                                                                                                                                                                                                                                                                                                                                                                                                                                                         | Taiwan Centers for Disease Control                                                                                                           | Taiwan Centers for Disease Control                                                                                                               | Ji-Rong Yang; Jung-Jung Mu; Ming-Tsan-Liu; Yu-Chi-Lin                                                                                                                                                                                                                                                                                                                                                                                                                                                                                                                                                                                                                                                                                         |                                                                                                                                                                                                                                                                                                                                                                                                   |
| EPI_ISL_2450575                                                                                                                                                                                                                                                                                                                                                                                                                                                                                                                                                                                                                                                                                        | Tambov Hospital                                                                                                                              | WHO National Influenza Centre Russian Federation                                                                                                 | Andrey Komissarov; Artem Fadeev; Daria Danilenko; Dmitry Lioznov; Elena Nabieva; Georgii Bazykin; Kirill Varchenko; Ksenia Safina; Kseniya Komissarova; Maria Pisareva; Maria Timofeeva; Mikhail Bakaev; Natalia Polovitsa; Nikita Yolshin; Oula Mansour; Tamila Musaeva; Veronika Eder                                                                                                                                                                                                                                                                                                                                                                                                                                                       |                                                                                                                                                                                                                                                                                                                                                                                                   |
| EPI_ISL_2081386                                                                                                                                                                                                                                                                                                                                                                                                                                                                                                                                                                                                                                                                                        | Tampa General Hospital Esoteric Lab                                                                                                          | Tampa General Hospital Esoteric Research & Development Lab                                                                                       | Amorce Lima; Deanna Becker; Dominic Uy; Grant Vestal; Suzane Silbert; Vicki Healer                                                                                                                                                                                                                                                                                                                                                                                                                                                                                                                                                                                                                                                            |                                                                                                                                                                                                                                                                                                                                                                                                   |
| EPI_ISL_1919863                                                                                                                                                                                                                                                                                                                                                                                                                                                                                                                                                                                                                                                                                        | Tawau Hospital                                                                                                                               | Institute for Medical Research, Infectious Disease Research Centre, National Institutes of Health, Ministry of Health Malaysia                   | Kamel K; Mohd Zawawi Z; Suppiah J; Thayan R                                                                                                                                                                                                                                                                                                                                                                                                                                                                                                                                                                                                                                                                                                   |                                                                                                                                                                                                                                                                                                                                                                                                   |
| EPI_ISL_1293118                                                                                                                                                                                                                                                                                                                                                                                                                                                                                                                                                                                                                                                                                        | Tempus                                                                                                                                       | Grubaugh Lab - Yale School of Public Health                                                                                                      | Anderson Brito; Annie Watkins; Chaney Kalinich; Chantal Vogels; Christopher E. Mason; Gaurav Khullar; Isabell Ott; Jessica Metti; Jessica Rothman; Joel T. Dudley; Joseph Fauver; Mallory Breban; Mary Petrone; Matthew J. MacKay; Megan Nash; Nathan Grubaugh; Nike Beaubier; Tara Alpert                                                                                                                                                                                                                                                                                                                                                                                                                                                    |                                                                                                                                                                                                                                                                                                                                                                                                   |
| EPI_ISL_976909                                                                                                                                                                                                                                                                                                                                                                                                                                                                                                                                                                                                                                                                                         | Thai Red Cross Emerging Infectious Diseases Health Science Centre, Chulalongkorn Hospital, Faculty of Medicine, Chulalongkorn University     | Thai Red Cross Emerging Infectious Diseases Center and Faculty of Medicine, Chulalongkorn University                                             | Apaporn Rodpan; Gompol Suwanpimolkul; Leilani Paitoonpong; Opass Putcharoen; Pattama Torvorapanit; Sininat Petcharat; Sopon Iamsirithaworn; Supaporn Wacharapluesadee; Thiravat Hemachudha; Watsamon Jantarabenjakul; Weenassarin Ampoot; Yuththana Jojijinda                                                                                                                                                                                                                                                                                                                                                                                                                                                                                 |                                                                                                                                                                                                                                                                                                                                                                                                   |
| EPI_ISL_756311, EPI_ISL_1490226, EPI_ISL_1498262, EPI_ISL_2478947, EPI_ISL_2478949, EPI_ISL_2478954                                                                                                                                                                                                                                                                                                                                                                                                                                                                                                                                                                                                    | The Caribbean Public Health Agency                                                                                                           | Carrington Lab, Department of PreClinical Sciences, Faculty of Medical Sciences, The University of the West Indies                               | Adesh Ramsubhag; Anushka Ramjag; Arianne Brown-Jordan; Avery Hinds; Chinna Chinnadurai; Christine V. F. Carrington; Christopher Oura; Gabriel Escobar; Jaya Jayaraman; Jerome Foster; Karla Georges; Marsha Ivey; Naresh Nandram; Nikita S. D. Sahadeo; Nuno Faria; Oliver Pybus; Rahul Naidu; Rajini Haraksingh; Risha Singh; Roshan Parasram; Sarah Hill; Sharon Belmar-George; Stanley Giddings; SueMin Nathaniel; Vernie Ramkissoon                                                                                                                                                                                                                                                                                                       |                                                                                                                                                                                                                                                                                                                                                                                                   |
| see above                                                                                                                                                                                                                                                                                                                                                                                                                                                                                                                                                                                                                                                                                              | The Caribbean Public Health Agency                                                                                                           | Carrington Lab, Department of Preclinical Sciences, Faculty of Medical Sciences, The University of the West Indies                               | Anushka Ramjag; Arianne Brown-Jordan; Avery Hinds; Christine V. F. Carrington; Christopher Oura; Gabriel Escobar; Karla Georges; Naresh Nandram; Nikita S. D. Sahadeo; Nuno Faria; Oliver Pybus; Risha Singh; Roshan Parasram; Sarah Hill; Sharon Belmar-George; SueMin Nathaniel; Vernie Ramkissoon                                                                                                                                                                                                                                                                                                                                                                                                                                          |                                                                                                                                                                                                                                                                                                                                                                                                   |
| EPI_ISL_2617930                                                                                                                                                                                                                                                                                                                                                                                                                                                                                                                                                                                                                                                                                        | The Caribbean Public Health Agency                                                                                                           | Carrington Lab, Department of Preclinical Sciences, Faculty of Medical Sciences, The University of the West Indies, St Augustine Campus          | Anushka Ramjag; Arianne Brown-Jordan; Avery Hinds; Christine V. F. Carrington; Christopher Oura; Gabriel Escobar; Karla Georges; Naresh Nandram; Nikita S. D. Sahadeo; Nuno Faria; Oliver Pybus; Risha Singh; Roshan Parasram; Sarah Hill; SueMin Nathaniel; Vernie Ramkissoon                                                                                                                                                                                                                                                                                                                                                                                                                                                                |                                                                                                                                                                                                                                                                                                                                                                                                   |
| EPI_ISL_1625630, EPI_ISL_2562123                                                                                                                                                                                                                                                                                                                                                                                                                                                                                                                                                                                                                                                                       | The Jackson Laboratory                                                                                                                       | The Jackson Laboratory                                                                                                                           | Adams M; Bergeron D; Kelly K; Li L; Long J; Omerza G; Renzette N                                                                                                                                                                                                                                                                                                                                                                                                                                                                                                                                                                                                                                                                              |                                                                                                                                                                                                                                                                                                                                                                                                   |
| EPI_ISL_2521999                                                                                                                                                                                                                                                                                                                                                                                                                                                                                                                                                                                                                                                                                        | The Laboratory of Biosafety with Pathogens Collection The Republican Research and Practical Center for Epidemiology and Microbiology (RRPCM) | Laboratory for HIV and opportunistic infections diagnosis The Republican Research and Practical Center for Epidemiology and Microbiology (RRPCM) | Anatoli Krasko; Artur Akhremchuk; Elena Gasich; Ilarion Kupryianav; Iryna Subotsina; Kirill Bulda; Larysa Radzienava; Leonid Valentovich; Olga Klimovich; Olga Saleuskaya; Sergei Semenov                                                                                                                                                                                                                                                                                                                                                                                                                                                                                                                                                     |                                                                                                                                                                                                                                                                                                                                                                                                   |
| EPI_ISL_2189031                                                                                                                                                                                                                                                                                                                                                                                                                                                                                                                                                                                                                                                                                        | The Medical City                                                                                                                             | Philippine Genome Center                                                                                                                         | Alethea R. de Guzman; Anna Ong-Lim; Arianne A. Zamora; Asia Louisa U. Chong; Benedict A. Maralit; Candice Francheska B. Tambaoan; Carlo M. Lapid; Celia Carlos; Devon Ray Pacial; Edsel Maurice Salvaña; El King D. Morado; Elcid Aaron R. Pangilinan; Eva Maria Cutiongco-de la Paz; Francis A. Tablizo; Irish Coleen A. Asin; Jaime C. Montoya; Jan Michael C. Yap; Jo-Hannah S. Llamas; John Q. Wong; Joshua Gregor A. Dizon; Juan Antonio R. Magalang; Karol Sophia Agape R. Padilla; Kenneth M. Kim; Kris P. Punayan; Marc Edsel C. Ayes; Maria Rosario Singh-Vergeire and Cynthia P. Saloma; Maria Sofia L. Yanzgon; Marissa Alejandria; Razel Nikka M. Hao; Renato Jacinto Q. Mantaring; Rianna Patricia S. Cruz; Sheila Mae M. Araiza |                                                                                                                                                                                                                                                                                                                                                                                                   |
| EPI_ISL_891224, EPI_ISL_891227                                                                                                                                                                                                                                                                                                                                                                                                                                                                                                                                                                                                                                                                         | The Oncology Institute "Prof. Dr. Ion Chiricuta" Cluj Napoca                                                                                 | "Stefan cel Mare" University Metagenomics Lab                                                                                                    | Gheorghita Roxana; Lobiuc Andrei                                                                                                                                                                                                                                                                                                                                                                                                                                                                                                                                                                                                                                                                                                              |                                                                                                                                                                                                                                                                                                                                                                                                   |
| EPI_ISL_2228242, EPI_ISL_2454305                                                                                                                                                                                                                                                                                                                                                                                                                                                                                                                                                                                                                                                                       | TriCore Reference Laboratories                                                                                                               | Center for Global Health, University of New Mexico Health Sciences Center                                                                        | Cecilia Thompson; Darrell Dinwiddie; Daryl Domman; Karissa Culbreath; Kendra Pesko; Kurt Schwalm; Valerie Morley                                                                                                                                                                                                                                                                                                                                                                                                                                                                                                                                                                                                                              |                                                                                                                                                                                                                                                                                                                                                                                                   |
| EPI_ISL_2598111                                                                                                                                                                                                                                                                                                                                                                                                                                                                                                                                                                                                                                                                                        | TriCore Reference Laboratories                                                                                                               | Center for Global Health, University of New Mexico Health Sciences Center                                                                        | Cecilia Thompson; Darrell Dinwiddie; Daryl Domman; Karissa Culbreath; Kendra Pesko; Kurt Schwalm; Valerie Morley                                                                                                                                                                                                                                                                                                                                                                                                                                                                                                                                                                                                                              |                                                                                                                                                                                                                                                                                                                                                                                                   |
| EPI_ISL_717695, EPI_ISL_717700, EPI_ISL_756362, EPI_ISL_1499115, EPI_ISL_2230680, EPI_ISL_2230681, EPI_ISL_2230682, EPI_ISL_2230686                                                                                                                                                                                                                                                                                                                                                                                                                                                                                                                                                                    | see above                                                                                                                                    | Trinidad Public Health Laboratory                                                                                                                | Carrington Lab, Department of PreClinical Sciences, Faculty of Medical Sciences, The University of the West Indies                                                                                                                                                                                                                                                                                                                                                                                                                                                                                                                                                                                                                            | Adesh Ramsubhag; Arianne Brown-Jordan; Avery Hinds; Chinna Chinnadurai; Christine V. F. Carrington; Christopher Oura; Gabriel Escobar; Jaya Jayaraman; Jerome Foster; Karla Georges; Marsha Ivey; Naresh Nandram; Nikita S. D. Sahadeo; Nuno Faria; Oliver Pybus; Rahul Naidu; Rajini Haraksingh; Risha Singh; Roshan Parasram; Sarah Hill; Stanley Giddings; SueMin Nathaniel; Vernie Ramkissoon |
| EPI_ISL_2545667                                                                                                                                                                                                                                                                                                                                                                                                                                                                                                                                                                                                                                                                                        | Tripler Army Medical Center                                                                                                                  | Tripler Army Medical Center                                                                                                                      | Jonathan A. D'Ambrozio; Kendra N. Carter; Lindsey L. O'Neal; Rachael L. Downham; Zakariae Bram; and Catherine F. Uyeahara                                                                                                                                                                                                                                                                                                                                                                                                                                                                                                                                                                                                                     |                                                                                                                                                                                                                                                                                                                                                                                                   |
| EPI_ISL_1298482                                                                                                                                                                                                                                                                                                                                                                                                                                                                                                                                                                                                                                                                                        | Tysmenytsia CH                                                                                                                               | The Institute of Molecular Biology and Genetics of NASU                                                                                          | M.Tukalo et al.                                                                                                                                                                                                                                                                                                                                                                                                                                                                                                                                                                                                                                                                                                                               |                                                                                                                                                                                                                                                                                                                                                                                                   |
| EPI_ISL_1993936, EPI_ISL_2099526                                                                                                                                                                                                                                                                                                                                                                                                                                                                                                                                                                                                                                                                       | UMC Groningen, Clinical Virology, Department of Medical Microbiology and Infection Prevention                                                | UMC Groningen, Clinical Virology, Department of Medical Microbiology and Infection Prevention                                                    | Alexander Friedrich; Coretta Van Leer-Buter; Erley Lizarazo-Forero; Hubert Niesters; Lilli Gard; Marjolein Knoester; Monika Fliiss; Sigrid Rosema; Xuewei Zhou                                                                                                                                                                                                                                                                                                                                                                                                                                                                                                                                                                                |                                                                                                                                                                                                                                                                                                                                                                                                   |
| EPI_ISL_2628728, EPI_ISL_2628976, EPI_ISL_2645940, EPI_ISL_2810609, EPI_ISL_2810702, EPI_ISL_2810726                                                                                                                                                                                                                                                                                                                                                                                                                                                                                                                                                                                                   | UNILABS                                                                                                                                      | Instituto Nacional de Saude (INSA)                                                                                                               | Borges et al                                                                                                                                                                                                                                                                                                                                                                                                                                                                                                                                                                                                                                                                                                                                  |                                                                                                                                                                                                                                                                                                                                                                                                   |
| EPI_ISL_2796475                                                                                                                                                                                                                                                                                                                                                                                                                                                                                                                                                                                                                                                                                        | UNILABS                                                                                                                                      | Instituto Nacional de Saude (INSA) and BioSystems & Integrative Sciences Institute (BioISI) Genomics Unit, FCUL                                  | Borges et al                                                                                                                                                                                                                                                                                                                                                                                                                                                                                                                                                                                                                                                                                                                                  |                                                                                                                                                                                                                                                                                                                                                                                                   |
| EPI_ISL_2796175                                                                                                                                                                                                                                                                                                                                                                                                                                                                                                                                                                                                                                                                                        | UNILABS                                                                                                                                      | Instituto Nacional de Saude (INSA) and Instituto Gulbenkian de Ciencia (IGC)                                                                     | Borges et al                                                                                                                                                                                                                                                                                                                                                                                                                                                                                                                                                                                                                                                                                                                                  |                                                                                                                                                                                                                                                                                                                                                                                                   |
| EPI_ISL_454410                                                                                                                                                                                                                                                                                                                                                                                                                                                                                                                                                                                                                                                                                         | UPMC Clinical Microbiology Laboratory                                                                                                        | Microbial Genome Sequencing Center, Microbial Genomic Epidemiological Laboratory                                                                 | Chinelo Ezeonwuku; Dan Snyder; Jane W. Marsh; Kady D. Waggle; Lee H. Harrison; Marissa P. Griffith; Mustapha M. Mustapha; Stephanie L. Mitchell; Vatsala R. Srinivasa; Vaughn S. Cooper                                                                                                                                                                                                                                                                                                                                                                                                                                                                                                                                                       |                                                                                                                                                                                                                                                                                                                                                                                                   |
| EPI_ISL_1091707, EPI_ISL_1260717, EPI_ISL_1711118, EPI_ISL_2383439, EPI_ISL_2383443, EPI_ISL_2450416                                                                                                                                                                                                                                                                                                                                                                                                                                                                                                                                                                                                   | US Air Force School of Aerospace Medicine                                                                                                    | US Air Force School of Aerospace Medicine                                                                                                        | Amanda Javorina; Anthony Fries; Carol Garrett; Clarise Starr; Cole Anderson; Elizabeth Macias; Fritz Castillo; Jennifer Meyer; Sarah Purves; William Buggele; William Gruner                                                                                                                                                                                                                                                                                                                                                                                                                                                                                                                                                                  |                                                                                                                                                                                                                                                                                                                                                                                                   |
| EPI_ISL_436045                                                                                                                                                                                                                                                                                                                                                                                                                                                                                                                                                                                                                                                                                         | US VI Department of Health                                                                                                                   | Pathogen Discovery, Respiratory Viruses Branch, Division of                                                                                      | Anna Uehara; Bettina Bankamp; Clinton R. Paden; Haibin Wang; Jing Zhang; Krista Queen; Suxiang Tong; Yan Li; Ying Tao; Zachary Weiner                                                                                                                                                                                                                                                                                                                                                                                                                                                                                                                                                                                                         |                                                                                                                                                                                                                                                                                                                                                                                                   |

|                                                                                                                                                                                                                                                                                                                                                                                                                                                                                                                                                                                                                                                                                                                                                                                                                                                                                                                                                                                                                                                                                                                                                                                                                                                                                                         |                                                                            |                                                                                                                            |                                                                                                                                                                                                                                                                                                                                                                                                                                                                                                                                                                                                                                                                                                                                                                                                                                                                                                                                                                                                                                                                                                                                                                                                                                                                                                                                                                                                                                                                                                                                                                                                        |  |
|---------------------------------------------------------------------------------------------------------------------------------------------------------------------------------------------------------------------------------------------------------------------------------------------------------------------------------------------------------------------------------------------------------------------------------------------------------------------------------------------------------------------------------------------------------------------------------------------------------------------------------------------------------------------------------------------------------------------------------------------------------------------------------------------------------------------------------------------------------------------------------------------------------------------------------------------------------------------------------------------------------------------------------------------------------------------------------------------------------------------------------------------------------------------------------------------------------------------------------------------------------------------------------------------------------|----------------------------------------------------------------------------|----------------------------------------------------------------------------------------------------------------------------|--------------------------------------------------------------------------------------------------------------------------------------------------------------------------------------------------------------------------------------------------------------------------------------------------------------------------------------------------------------------------------------------------------------------------------------------------------------------------------------------------------------------------------------------------------------------------------------------------------------------------------------------------------------------------------------------------------------------------------------------------------------------------------------------------------------------------------------------------------------------------------------------------------------------------------------------------------------------------------------------------------------------------------------------------------------------------------------------------------------------------------------------------------------------------------------------------------------------------------------------------------------------------------------------------------------------------------------------------------------------------------------------------------------------------------------------------------------------------------------------------------------------------------------------------------------------------------------------------------|--|
| EPI_ISL_2260379<br>EPI_ISL_2018388                                                                                                                                                                                                                                                                                                                                                                                                                                                                                                                                                                                                                                                                                                                                                                                                                                                                                                                                                                                                                                                                                                                                                                                                                                                                      | USC Clinical Lab<br>UT-Unified State Labs: Public Health Utah DOH          | Los Angeles County PHL<br>Centers for Disease Control and Prevention Division of Viral Diseases, Pathogen Discovery        | P. Hemarajata et al.                                                                                                                                                                                                                                                                                                                                                                                                                                                                                                                                                                                                                                                                                                                                                                                                                                                                                                                                                                                                                                                                                                                                                                                                                                                                                                                                                                                                                                                                                                                                                                                   |  |
| EPI_ISL_418037, EPI_ISL_1620980, EPI_ISL_1628185, EPI_ISL_1670711, EPI_ISL_1670827, EPI_ISL_1679851, EPI_ISL_1715449, EPI_ISL_1715512, EPI_ISL_1715530, EPI_ISL_1715565, EPI_ISL_1785682, EPI_ISL_1789323, EPI_ISL_1789408, EPI_ISL_1789424, EPI_ISL_1789426, EPI_ISL_1826129, EPI_ISL_1826132, EPI_ISL_1827723, EPI_ISL_1849851, EPI_ISL_1850287, EPI_ISL_2002190, EPI_ISL_2002289, EPI_ISL_2002395, EPI_ISL_2002689, EPI_ISL_2002743, EPI_ISL_2002774, EPI_ISL_2002825, EPI_ISL_2002836, EPI_ISL_2002857, EPI_ISL_2002865, EPI_ISL_2002878, EPI_ISL_2002924, EPI_ISL_2031271, EPI_ISL_2031294, EPI_ISL_2031501, EPI_ISL_2031502, EPI_ISL_2031505, EPI_ISL_2031506, EPI_ISL_2031512, EPI_ISL_2037457, EPI_ISL_2037467, EPI_ISL_2037490, EPI_ISL_2037527, EPI_ISL_2037537, EPI_ISL_2037573, EPI_ISL_2037581, EPI_ISL_2037634, EPI_ISL_2037663, EPI_ISL_2082516, EPI_ISL_2082680, EPI_ISL_2086392, EPI_ISL_2086411, EPI_ISL_2104962, EPI_ISL_2233209, EPI_ISL_2497395, EPI_ISL_2502898, EPI_ISL_2502925, EPI_ISL_2502986, EPI_ISL_2503005, EPI_ISL_2503017, EPI_ISL_2503018, EPI_ISL_2503049, EPI_ISL_2503087, EPI_ISL_2503106, EPI_ISL_2545145, EPI_ISL_2549418, EPI_ISL_2618118, EPI_ISL_2618216, EPI_ISL_2618264, EPI_ISL_2618292, EPI_ISL_2618387, EPI_ISL_2618402, EPI_ISL_2618579, EPI_ISL_2802977 |                                                                            |                                                                                                                            |                                                                                                                                                                                                                                                                                                                                                                                                                                                                                                                                                                                                                                                                                                                                                                                                                                                                                                                                                                                                                                                                                                                                                                                                                                                                                                                                                                                                                                                                                                                                                                                                        |  |
| see above                                                                                                                                                                                                                                                                                                                                                                                                                                                                                                                                                                                                                                                                                                                                                                                                                                                                                                                                                                                                                                                                                                                                                                                                                                                                                               | UW Virology Lab                                                            | UW Virology Lab                                                                                                            | Alexander Greninger; Hong Xie; Keith Jerome; Keith R Jerome; Lasata Shrestha; Meei-Li Huang; Michelle Lin; Nathan Breit; Noah R. Baker; Patrick Mathias; Pavitra Roychoudhury; Ricardo Perez; Robert J. Livingston; Saraswathi Sathees; Sean Ellis; Shah Mohamed Bakhsh; Tien V. Nguyen                                                                                                                                                                                                                                                                                                                                                                                                                                                                                                                                                                                                                                                                                                                                                                                                                                                                                                                                                                                                                                                                                                                                                                                                                                                                                                                |  |
| EPI_ISL_737951                                                                                                                                                                                                                                                                                                                                                                                                                                                                                                                                                                                                                                                                                                                                                                                                                                                                                                                                                                                                                                                                                                                                                                                                                                                                                          | Uganda Central Public Health Lab and Uganda Virus Research Institute       | MRC/UVRI & LSHTM Uganda Research Unit                                                                                      | Dan Lule Bugembe; Matthew Cotten; My V.T. Phan; Pontiano Kaleebu et al.                                                                                                                                                                                                                                                                                                                                                                                                                                                                                                                                                                                                                                                                                                                                                                                                                                                                                                                                                                                                                                                                                                                                                                                                                                                                                                                                                                                                                                                                                                                                |  |
| EPI_ISL_451199                                                                                                                                                                                                                                                                                                                                                                                                                                                                                                                                                                                                                                                                                                                                                                                                                                                                                                                                                                                                                                                                                                                                                                                                                                                                                          | Uganda Virus Research Institute                                            | MRC/UVRI & LSHTM Uganda Research Unit                                                                                      | Beatrice Dhaala; Dan Lule Bugembe; Deogratius Ssemwanga; Henry Kyobe; Henry Mwebesa; Jane Aceng; John Kiyiwa; Jonas Lexow; Julius Lutwama; Matthew Cotten; My V.T. Phan; Phionah Tushabe; Pontiano Kaleebu; Stephen Balinandi                                                                                                                                                                                                                                                                                                                                                                                                                                                                                                                                                                                                                                                                                                                                                                                                                                                                                                                                                                                                                                                                                                                                                                                                                                                                                                                                                                          |  |
| EPI_ISL_1662223                                                                                                                                                                                                                                                                                                                                                                                                                                                                                                                                                                                                                                                                                                                                                                                                                                                                                                                                                                                                                                                                                                                                                                                                                                                                                         | Unidad de Investigacion Biomedica de Zacatecas (UIBZ)                      | Unidad de Genomica Avanzada                                                                                                | Alejandro Sanchez-Flores; Alfredo Herrera-Estrella; Alicia Ocana-Mondragon; Angel Gustavo Salas-Lais; Bernardo Martinez-Miguel; Blanca Taboada; Brenda Irasema Maldonado-Meza; Carla Ivon Herrera-Najera; Carlos F. Arias; Celia Boukadida; Celida Duque Molina; Clara Esperanza Santacruz-Tinoco; Concepcion Grajales-Muniz; Consorcio Mexicano de Vigilancia Genomica (CoViGen-Mex). Authors (in alphabetical order): Julio Elias Alvarado-Yaah; Fernando Fontove-Herrera; Francisco Pulido; Gloria Elena Espinoza-Ayala; Gloria Maria Molina-Salinas; Gloria Vazquez; Hector Esteban Paz-Juarez; Hector Montoya-Fuentes; Helen Haydee Fernanda Ramirez-Plascencia; Jose Antonio Enciso-Moreno; Jose Esteban Munoz-Medina; Jose de Jesus Nunez-Contreras; Juan Bautista Chale-Dzul; Luis Alberto Ochoa-Carrera; Margarita Matias-Florentino; Maria Guadalupe Santiago-Mauricio; Maria Guadalupe de Jesus Mireles-Rivera; Nelly Selem-Mojica; Pavel Isa; Ricardo Grande; Santiago Avila-Rios; Victor Eduardo Garcia-Arias; Victor Hugo Borja-Aburto                                                                                                                                                                                                                                                                                                                                                                                                                                                                                                                                                   |  |
| EPI_ISL_1351468, EPI_ISL_1351489, EPI_ISL_1351492, EPI_ISL_1351494, EPI_ISL_1351498                                                                                                                                                                                                                                                                                                                                                                                                                                                                                                                                                                                                                                                                                                                                                                                                                                                                                                                                                                                                                                                                                                                                                                                                                     | Unidad de Investigaci n M dica de Yucat n (UIMY)                           | Unidad de Genomica Avanzada                                                                                                | Alejandro Sanchez-Flores; Alfredo Herrera-Estrella; Alicia Ocana-Mondragon; Angel Gustavo Salas-Lais; Bernardo Martinez-Miguel; Blanca Taboada; Brenda Irasema Maldonado-Meza; Carla Ivon Herrera-Najera; Carlos F. Arias; Celia Boukadida; Clara Esperanza Santacruz-Tinoco; Concepcion Grajales-Muniz; Consorcio Mexicano de Vigilancia Genomica (CoViGen-Mex). Authors (in alphabetical order): Julio Elias Alvarado-Yaah; Fernando Fontove-Herrera; Francisco Pulido; Gloria Elena Espinoza-Ayala; Gloria Maria Molina-Salinas; Gloria Vazquez; Hector Esteban Paz-Juarez; Hector Montoya-Fuentes; Helen Haydee Fernanda Ramirez-Plascencia; Jose Antonio Enciso-Moreno; Jose Esteban Munoz-Medina; Jose de Jesus Nunez-Contreras; Juan Bautista Chale-Dzul; Luis Alberto Ochoa-Carrera; Margarita Matias-Florentino; Maria Guadalupe Santiago-Mauricio; Maria Guadalupe de Jesus Mireles-Rivera; Nelly Selem-Mojica; Pavel Isa; Ricardo Grande; Santiago Avila-Rios; Victor Hugo Borja-Aburto                                                                                                                                                                                                                                                                                                                                                                                                                                                                                                                                                                                                     |  |
| EPI_ISL_2490502, EPI_ISL_2490510                                                                                                                                                                                                                                                                                                                                                                                                                                                                                                                                                                                                                                                                                                                                                                                                                                                                                                                                                                                                                                                                                                                                                                                                                                                                        | Unidad de Investigaci n Biom dica de Zacatecas (UIBZ)                      | Centro de Investigaci n en Enfermedades Infecciosas (CIENI), Instituto Nacional de Enfermedades Respiratorias (INER)       | ; Alejandra Garcia-Gasca; Alejandra Hern ndez-Ter n; Alejandro Sanchez-Flores; Alfredo Herrera-Estrella; Alicia Oca a-Mondrag n; Andreu Comas-Garc a; Angel Gustavo Salas-Lais; Antonio Loza Rom n; Bernardo Mart nez-Miguel; Blanca Taboada; Brenda Irasema Maldonado-Meza; Bruno Gomez-Gil; Carla Iv n Herrera-Najera; Carlos F. Arias; Celia Boukadida; Clara Esperanza Santacruz-Tinoco; Concepci n Grajales-Mu iz; Consorcio Mexicano de Vigilancia Genom ica (CoViGen-Mex). Authors (in alphabetical order): Julio Elias Alvarado-Yaah; Crist bal Ch idez-Quir z; C lida Duque Molina; C lida Mart nez- Rodr guez; Daniel Fregoso-Rueda; Daniel Lira Morales; Eduardo Becerril-Vargas; Fernando Fontove-Herrera; Fidencio Mej a-Nepomuceno; Francisco Pulido; Gloria Elena Espinoza-Ayala; Gloria Mar a Molina-Salinas; Gloria V zquez; Hector Esteban Paz-J  rez; Hector Montoya-Fuentes; Helen Haydee Fernanda Ram rez-Plascencia; Irvin Gonz lez-L pez; Jean Pierre Gonz lez; Joel Armando V zquez-P rez; Jorge Salas-Hern ndez; Jos  Antonio Enciso-M reno; Jos  Arturo Mart nez-Orozco; Jos  Esteban Mu oz-Medina; Jos  de Jes s N  ez-Contreras; Juan Bautista Chale-Dzul; Julissa Enciso-Ibarra; Luis Alberto Ochoa-Carrera; Margarita Mat as-Florentino; Mario M jica-S nchez; Marissa Perez-Garc a; Maria Guadalupe Santiago-Mauricio; Maria Guadalupe de Jes s Mireles-Rivera; Nelly S  em-Mojica; Pavel Isa; Ricardo C ria Merce; Ricardo Grande; Rosa Mar a Guti rrez R os; Santiago Avila-R os; Selene Z r ate; Susana Lopez; Victor Eduardo Garcia-Arias; Victor Hugo Borja-Aburto |  |
| EPI_ISL_1279365, EPI_ISL_1279374                                                                                                                                                                                                                                                                                                                                                                                                                                                                                                                                                                                                                                                                                                                                                                                                                                                                                                                                                                                                                                                                                                                                                                                                                                                                        | Unidad de Investigaci n Biom dica de Zacatecas (UIBZ)                      | Instituto Nacional de Enfermedades Respiratorias (INER); Centro de Investigaci n en Enfermedades Infecciosas (CIENI)       | Alejandro Sanchez-Flores; Alfredo Herrera-Estrella; Alicia Oca a-Mondrag n; Angel Gustavo Salas-Lais; Bernardo Mart nez-Miguel; Blanca Taboada; Brenda Irasema Maldonado-Meza; Carla Iv n Herrera-Najera; Carlos F. Arias; Celia Boukadida; Clara Esperanza Santacruz-Tinoco; Concepci n Grajales-Mu iz; Consorcio Mexicano de Vigilancia Genom ica (CoViGen-Mex). Authors (in alphabetical order): Julio Elias Alvarado-Yaah; Fernando Fontove-Herrera; Francisco Pulido; Gloria Elena Espinoza-Ayala; Gloria Maria Molina-Salinas; Gloria V zquez; Hector Esteban Paz-J  rez; Hector Montoya-Fuentes; Helen Haydee Fernanda Ram rez-Plascencia; Jorge Ivan Salinal-Navarez; Jos  Antonio Enciso-Moreno; Jos  Esteban Mu oz-Medina; Jos  de Jes s N  ez-Contreras; Juan Bautista Chale-Dzul; Luis Alberto Ochoa-Carrera; Margarita Mat as-Florentino; Maria Guadalupe Santiago-Mauricio; Maria Guadalupe de Jes s Mireles-Rivera; Nelly S  em-Mojica; Pavel Isa; Ricardo Grande; Santiago Avila-R os; Victor Hugo Borja-Aburto                                                                                                                                                                                                                                                                                                                                                                                                                                                                                                                                                                        |  |
| EPI_ISL_2402096                                                                                                                                                                                                                                                                                                                                                                                                                                                                                                                                                                                                                                                                                                                                                                                                                                                                                                                                                                                                                                                                                                                                                                                                                                                                                         | Unidad de Investigaci n Biom dica de Zacatecas (UIBZ)                      | Unidad de Genomica Avanzada                                                                                                | Alejandro Sanchez-Flores; Alfredo Herrera-Estrella; Alicia Ocana-Mondragon; Angel Gustavo Salas-Lais; Bernardo Martinez-Miguel; Blanca Taboada; Brenda Irasema Maldonado-Meza; Carla Ivon Herrera-Najera; Carlos F. Arias; Celia Boukadida; Clara Esperanza Santacruz-Tinoco; Concepcion Grajales-Muniz; Consorcio Mexicano de Vigilancia Genomica (CoViGen-Mex). Authors (in alphabetical order): Julio Elias Alvarado-Yaah; Fernando Fontove-Herrera; Francisco Pulido; Gloria Elena Espinoza-Ayala; Gloria Maria Molina-Salinas; Gloria Vazquez; Hector Esteban Paz-Juarez; Hector Montoya-Fuentes; Helen Haydee Fernanda Ramirez-Plascencia; Jose Antonio Enciso-Moreno; Jose Esteban Munoz-Medina; Jose de Jesus Nunez-Contreras; Juan Bautista Chale-Dzul; Luis Alberto Ochoa-Carrera; Margarita Matias-Florentino; Maria Guadalupe Santiago-Mauricio; Maria Guadalupe de Jesus Mireles-Rivera; Nelly Selem-Mojica; Pavel Isa; Ricardo Grande; Santiago Avila-Rios; Victor Hugo Borja-Aburto                                                                                                                                                                                                                                                                                                                                                                                                                                                                                                                                                                                                     |  |
| EPI_ISL_2091244                                                                                                                                                                                                                                                                                                                                                                                                                                                                                                                                                                                                                                                                                                                                                                                                                                                                                                                                                                                                                                                                                                                                                                                                                                                                                         | Unidad de Investigaci n M dica de Yucat n (UIMY)                           | Centro de Investigaci n en Enfermedades Infecciosas (CIENI), Instituto Nacional de Enfermedades Respiratorias (INER)       | Alejandro Sanchez-Flores; Alfredo Herrera-Estrella; Alicia Oca a-Mondrag n; Angel Gustavo Salas-Lais; Bernardo Mart nez-Miguel; Blanca Taboada; Brenda Irasema Maldonado-Meza; Carla Iv n Herrera-Najera; Carlos F. Arias; Celia Boukadida; Clara Esperanza Santacruz-Tinoco; Concepci n Grajales-Mu iz; Consorcio Mexicano de Vigilancia Genom ica (CoViGen-Mex). Authors (in alphabetical order): Julio Elias Alvarado-Yaah; C lida Duque Molina; Fernando Fontove-Herrera; Francisco Pulido; Gloria Elena Espinoza-Ayala; Gloria Mar a Molina-Salinas; Gloria V zquez; Hector Esteban Paz-J  rez; Hector Montoya-Fuentes; Helen Haydee Fernanda Ram rez-Plascencia; Jos  Antonio Enciso-Moreno; Jos  Esteban Mu oz-Medina; Jos  de Jes s N  ez-Contreras; Juan Bautista Chale-Dzul; Luis Alberto Ochoa-Carrera; Margarita Mat as-Florentino; Maria Guadalupe Santiago-Mauricio; Maria Guadalupe de Jes s Mireles-Rivera; Nelly S  em-Mojica; Pavel Isa; Ricardo Grande; Santiago Avila-R os; Victor Eduardo Garcia-Arias; Victor Hugo Borja-Aburto                                                                                                                                                                                                                                                                                                                                                                                                                                                                                                                                                  |  |
| EPI_ISL_1585434, EPI_ISL_1585443                                                                                                                                                                                                                                                                                                                                                                                                                                                                                                                                                                                                                                                                                                                                                                                                                                                                                                                                                                                                                                                                                                                                                                                                                                                                        | Unidad de Investigaci n M dica de Yucat n (UIMY)                           | Instituto Nacional de Enfermedades Respiratorias (INER); Centro de Investigaci n en Enfermedades Infecciosas (CIENI)       | Alejandro Sanchez-Flores; Alfredo Herrera-Estrella; Alicia Oca a-Mondrag n; Angel Gustavo Salas-Lais; Bernardo Mart nez-Miguel; Blanca Taboada; Brenda Irasema Maldonado-Meza; Carla Iv n Herrera-Najera; Carlos F. Arias; Celia Boukadida; Clara Esperanza Santacruz-Tinoco; Concepci n Grajales-Mu iz; Consorcio Mexicano de Vigilancia Genom ica (CoViGen-Mex). Authors (in alphabetical order): Julio Elias Alvarado-Yaah; C lida Duque Molina; Fernando Fontove-Herrera; Francisco Pulido; Gloria Elena Espinoza-Ayala; Gloria Mar a Molina-Salinas; Gloria V zquez; Hector Esteban Paz-J  rez; Hector Montoya-Fuentes; Helen Haydee Fernanda Ram rez-Plascencia; Jos  Antonio Enciso-Moreno; Jos  Esteban Mu oz-Medina; Jos  de Jes s N  ez-Contreras; Juan Bautista Chale-Dzul; Luis Alberto Ochoa-Carrera; Margarita Mat as-Florentino; Maria Guadalupe Santiago-Mauricio; Maria Guadalupe de Jes s Mireles-Rivera; Nelly S  em-Mojica; Pavel Isa; Ricardo Grande; Santiago Avila-R os; Victor Eduardo Garcia-Arias; Victor Hugo Borja-Aburto                                                                                                                                                                                                                                                                                                                                                                                                                                                                                                                                                  |  |
| EPI_ISL_2426083                                                                                                                                                                                                                                                                                                                                                                                                                                                                                                                                                                                                                                                                                                                                                                                                                                                                                                                                                                                                                                                                                                                                                                                                                                                                                         | Unilabs Laboratory Medicine                                                | Norwegian Institute of Public Health, Department of Virology                                                               | Atiya R Ali; Debech Nadia; Engebretsen Serina Beate; Garcia Llorente Ignacio; Hilde Elshaug; Hilde Vollan; Jon Br te; Kamilla Heddeland Instefjord; Karoline Bragstad; Kathrine Stene-Johansen; Line Victoria Moen; Marie Paulsen Madsen; Olav H nnes; Pedersen Benedikte Nevjen; Rasmus Riis Kopperud                                                                                                                                                                                                                                                                                                                                                                                                                                                                                                                                                                                                                                                                                                                                                                                                                                                                                                                                                                                                                                                                                                                                                                                                                                                                                                 |  |
| EPI_ISL_1260721                                                                                                                                                                                                                                                                                                                                                                                                                                                                                                                                                                                                                                                                                                                                                                                                                                                                                                                                                                                                                                                                                                                                                                                                                                                                                         | United States Air Force Academy                                            | US Air Force School of Aerospace Medicine                                                                                  | Amanda Javorina; Anthony Fries; Clarise Starr; Elizabeth Macias; Jennifer Meyer; Sarah Purves; William Buggele; William Gruner                                                                                                                                                                                                                                                                                                                                                                                                                                                                                                                                                                                                                                                                                                                                                                                                                                                                                                                                                                                                                                                                                                                                                                                                                                                                                                                                                                                                                                                                         |  |
| EPI_ISL_812657, EPI_ISL_831873                                                                                                                                                                                                                                                                                                                                                                                                                                                                                                                                                                                                                                                                                                                                                                                                                                                                                                                                                                                                                                                                                                                                                                                                                                                                          | United States Air Force School of Aerospace Medicine                       | United States Air Force School of Aerospace Medicine                                                                       | Amanda Javorina; Anthony Fries; Clarise Starr; Elizabeth Macias; Jennifer Meyer; Sarah Purves; William Gruner                                                                                                                                                                                                                                                                                                                                                                                                                                                                                                                                                                                                                                                                                                                                                                                                                                                                                                                                                                                                                                                                                                                                                                                                                                                                                                                                                                                                                                                                                          |  |
| EPI_ISL_1035988                                                                                                                                                                                                                                                                                                                                                                                                                                                                                                                                                                                                                                                                                                                                                                                                                                                                                                                                                                                                                                                                                                                                                                                                                                                                                         | Universidad de Le n                                                        | SeqCOVID-SPAIN consortium/IBV(CSIC)                                                                                        | Ana Carvajal; Antonio J. Molina and SeqCOVID-SPAIN consortium; H ctor Arg uello; Juan M. Fregeneda; Tania Fern ndez-Villa; Vicente Mart n                                                                                                                                                                                                                                                                                                                                                                                                                                                                                                                                                                                                                                                                                                                                                                                                                                                                                                                                                                                                                                                                                                                                                                                                                                                                                                                                                                                                                                                              |  |
| EPI_ISL_812966                                                                                                                                                                                                                                                                                                                                                                                                                                                                                                                                                                                                                                                                                                                                                                                                                                                                                                                                                                                                                                                                                                                                                                                                                                                                                          | University Clinical Research Center, University of Sciences                | University Clinical Research Center, University of Sciences                                                                | A.A.; Bane, S.; Dao, S.; Diakite, M.; Diarra, B.; Dombia, S.; Guindo, I.; Iknane; Kone, A.                                                                                                                                                                                                                                                                                                                                                                                                                                                                                                                                                                                                                                                                                                                                                                                                                                                                                                                                                                                                                                                                                                                                                                                                                                                                                                                                                                                                                                                                                                             |  |
| EPI_ISL_581913, EPI_ISL_581996, EPI_ISL_1389962                                                                                                                                                                                                                                                                                                                                                                                                                                                                                                                                                                                                                                                                                                                                                                                                                                                                                                                                                                                                                                                                                                                                                                                                                                                         | University Hospital Basel, Clinical Virology                               | University Hospital Basel, Clinical Bacteriology                                                                           | Adrian Egli; Alexander Gensch; Alfredo Mari; Christian Nickel; Hans Hirsch; Hans Pargger; Helena MB Seth-Smith; Julia Bielecki; Karoline Leuzinger; Kirstine K. Soegaard; Madlen Stange; Manuel Battegay; Martin Siegemund; Michael Osthoff; Michael Schweitzer; Myrta Brunner; Rita Schneider-Sliwa; Roland Bingisser; Sarah Tschudin-Sutter; Simon Fuchs; Stefano Bassetti; Tim Roloff                                                                                                                                                                                                                                                                                                                                                                                                                                                                                                                                                                                                                                                                                                                                                                                                                                                                                                                                                                                                                                                                                                                                                                                                               |  |
| EPI_ISL_1240790                                                                                                                                                                                                                                                                                                                                                                                                                                                                                                                                                                                                                                                                                                                                                                                                                                                                                                                                                                                                                                                                                                                                                                                                                                                                                         | University Hospitals Translational Laboratory (UHTL), University Hospitals | University Hospitals Translational Laboratory (UHTL), University Hospitals                                                 | Alouani, D.; Sadri, N.; Song, X.                                                                                                                                                                                                                                                                                                                                                                                                                                                                                                                                                                                                                                                                                                                                                                                                                                                                                                                                                                                                                                                                                                                                                                                                                                                                                                                                                                                                                                                                                                                                                                       |  |
| EPI_ISL_1040386, EPI_ISL_1533218, EPI_ISL_1811202, EPI_ISL_1963016, EPI_ISL_1963298, EPI_ISL_1963299, EPI_ISL_1963300, EPI_ISL_2104479, EPI_ISL_2104494, EPI_ISL_2213579, EPI_ISL_2213582, EPI_ISL_2343033, EPI_ISL_2343125, EPI_ISL_2601080                                                                                                                                                                                                                                                                                                                                                                                                                                                                                                                                                                                                                                                                                                                                                                                                                                                                                                                                                                                                                                                            | see above                                                                  | HUG, Laboratory of Virology and the Health2030 Genome Center                                                               | Ana Rita Goncalves; Deborah Penet; Emmanouil Dermatzakis; Henri Peugeot; Ioannis Xenarios; Keith Harshman; Laurent Kaiser; Lorenzo Cerutti; Melyssa Elies; Samuel Cordey                                                                                                                                                                                                                                                                                                                                                                                                                                                                                                                                                                                                                                                                                                                                                                                                                                                                                                                                                                                                                                                                                                                                                                                                                                                                                                                                                                                                                               |  |
| EPI_ISL_2100469, EPI_ISL_2100480, EPI_ISL_2100482                                                                                                                                                                                                                                                                                                                                                                                                                                                                                                                                                                                                                                                                                                                                                                                                                                                                                                                                                                                                                                                                                                                                                                                                                                                       | University of Health Sciences                                              | Quadram Institute Bioscience                                                                                               | Alam Khan; Alexander J Trotter; Alison E. Mather; Almira Shafiq; Alp Aydin; Ana P. Tedim; Anastasia Kolyva; Andrew Bell; Andrew J. Page; Claire Stuart; Dave J. Baker; Gemma L. Kay; Javed Akram; John Wain; Justin O'Grady; Leonardo de Oliveira Martins; Lizzie Meadows; Maria Diaz; Mark Webber; Muhammad Bilal Sarwar; Muhammad Roman; Muhammed Yasir; Nabil-Fareed Alikhan; Nadeem Afzal; Ngozi Elumogo; Nicholas M. Thomson; Rachael Stanley; Rachel Gilroy; Reenesh Prakash; Samir Dervisevic; Samuel Bloomfield; Shah Jahan; Sidra-tul-muntaha; Steven Rudder; Thanh Le-Viet                                                                                                                                                                                                                                                                                                                                                                                                                                                                                                                                                                                                                                                                                                                                                                                                                                                                                                                                                                                                                   |  |
| EPI_ISL_976938                                                                                                                                                                                                                                                                                                                                                                                                                                                                                                                                                                                                                                                                                                                                                                                                                                                                                                                                                                                                                                                                                                                                                                                                                                                                                          | University of Massachusetts Medical School                                 | Infectious Disease Program, Broad Institute of Harvard and MIT                                                             | Adams, G.; B.L.; B.W.; Bauer, M.; Birren; Carter, A.; Chaluvasi, S.; D.J.; DeRuff, K.; Ellison, R.; Gallagher, G.; Gladden-Young, A.; J.E.; K.J.; Lagerborg, K.; Lemieux; Loreth, C.; MacInnis; Normandin, E.; P.C.; Park; Reilly, S.; Rudy, M.; Siddle; Smole, S.; Tomkins-Tinch, C.; Ward, D.; and Sabeti                                                                                                                                                                                                                                                                                                                                                                                                                                                                                                                                                                                                                                                                                                                                                                                                                                                                                                                                                                                                                                                                                                                                                                                                                                                                                            |  |
| EPI_ISL_896374                                                                                                                                                                                                                                                                                                                                                                                                                                                                                                                                                                                                                                                                                                                                                                                                                                                                                                                                                                                                                                                                                                                                                                                                                                                                                          | University of Medicine and Pharmacy of Craiova                             | "Stefan cel Mare" University Metagenomics Lab                                                                              | Gheorghita Roxana; Lobiuc Andrei                                                                                                                                                                                                                                                                                                                                                                                                                                                                                                                                                                                                                                                                                                                                                                                                                                                                                                                                                                                                                                                                                                                                                                                                                                                                                                                                                                                                                                                                                                                                                                       |  |
| EPI_ISL_590727, EPI_ISL_1919930, EPI_ISL_2001270, EPI_ISL_2001286, EPI_ISL_2100385, EPI_ISL_2612297                                                                                                                                                                                                                                                                                                                                                                                                                                                                                                                                                                                                                                                                                                                                                                                                                                                                                                                                                                                                                                                                                                                                                                                                     | University of Michigan Clinical Microbiology Laboratory                    | Lauring Lab, University of Michigan, Department of Microbiology and Immunology                                             | Valesano                                                                                                                                                                                                                                                                                                                                                                                                                                                                                                                                                                                                                                                                                                                                                                                                                                                                                                                                                                                                                                                                                                                                                                                                                                                                                                                                                                                                                                                                                                                                                                                               |  |
| EPI_ISL_1527249, EPI_ISL_2333917, EPI_ISL_2497893, EPI_ISL_2497894                                                                                                                                                                                                                                                                                                                                                                                                                                                                                                                                                                                                                                                                                                                                                                                                                                                                                                                                                                                                                                                                                                                                                                                                                                      | University of Mississippi Medical Center, Department of Pathology          | University of Mississippi Medical Center, Molecular and Genomics Core Facility                                             | Ashley C. Johnson; D. Ashley Robinson; Ithiel J. Frame; Krishna K. Ayyalasomayajula; Michael R. Garrett                                                                                                                                                                                                                                                                                                                                                                                                                                                                                                                                                                                                                                                                                                                                                                                                                                                                                                                                                                                                                                                                                                                                                                                                                                                                                                                                                                                                                                                                                                |  |
| EPI_ISL_2382313                                                                                                                                                                                                                                                                                                                                                                                                                                                                                                                                                                                                                                                                                                                                                                                                                                                                                                                                                                                                                                                                                                                                                                                                                                                                                         | University of Pittsburgh                                                   | Genomics and Discovery, Respiratory Viruses Branch, Division of Viral Diseases, Centers for Disease Control and Prevention | Adam Retchless; Anna Kelleher; Anna Uehara; Brian Lynch; Clinton R. Paden; Dhvani Batra; Haibin Wang; Han Jia Justin Ng; Jasmine Padilla; Jing Zhang; Justin Lee; Krista Queen; Mark Burroughs; Mili Sheth; Morgan Davis; Peter Cook; Rachel Marine; Sarah Nobles; Suxiang Tong; Tara Coalter; Yan Li; Ying Tao                                                                                                                                                                                                                                                                                                                                                                                                                                                                                                                                                                                                                                                                                                                                                                                                                                                                                                                                                                                                                                                                                                                                                                                                                                                                                        |  |
| EPI_ISL_416491, EPI_ISL_1064293, EPI_ISL_1112214, EPI_ISL_1403817, EPI_ISL_1493127                                                                                                                                                                                                                                                                                                                                                                                                                                                                                                                                                                                                                                                                                                                                                                                                                                                                                                                                                                                                                                                                                                                                                                                                                      | University of Wisconsin-Madison AIDS Vaccine Research Laboratories         | University of Wisconsin-Madison AIDS Vaccine Research Laboratories                                                         | Gage Moreno; Katarina Braun; et al. AIDS Vaccine Research Laboratories                                                                                                                                                                                                                                                                                                                                                                                                                                                                                                                                                                                                                                                                                                                                                                                                                                                                                                                                                                                                                                                                                                                                                                                                                                                                                                                                                                                                                                                                                                                                 |  |
| EPI_ISL_977331, EPI_ISL_977421, EPI_ISL_977463, EPI_ISL_977469, EPI_ISL_2803691                                                                                                                                                                                                                                                                                                                                                                                                                                                                                                                                                                                                                                                                                                                                                                                                                                                                                                                                                                                                                                                                                                                                                                                                                         | University of Zambia, School of Veterinary Medicine                        | UNZAVET and PATH                                                                                                           | Daniel Bridges; Mulenga Mwenda-Chimfwembe; Ngonda Saasa; ZNPHI and ZGSC                                                                                                                                                                                                                                                                                                                                                                                                                                                                                                                                                                                                                                                                                                                                                                                                                                                                                                                                                                                                                                                                                                                                                                                                                                                                                                                                                                                                                                                                                                                                |  |
| EPI_ISL_856695                                                                                                                                                                                                                                                                                                                                                                                                                                                                                                                                                                                                                                                                                                                                                                                                                                                                                                                                                                                                                                                                                                                                                                                                                                                                                          | University of Zambia, School of Veterinary Medicine, Disease Control       | University of Zambia, School of Veterinary Medicine, Disease Control                                                       | A.L.; A.N.; Bates, M.; C. and Zumla, A.; Chambaro, H.; Chanda, D.; Changula, K.; Chilufya; Chipimo; Chitanga, S.; Fwoloshi, S.; K.S.; Kapata; Kapata, N.; Kapaya, F.; Kapin'a, M.; Kayeyi, N.; Liwewe, M.M.; Malama, K.; Masahiro, K.; Monze, M.; Morales; Mubemba, B.; Mukonka, V.; Mulenga, L.; Muleya, W.; Mupeta, F.; Musonda, K.; Nalubamba; Ngosa, W.; P.C.; P.J.; Saasa, N.; Sawa, H.; Shibemba; Simulundu, E.; Sinyange, N.; Takada, A.; Tembo, J.; Zulu, P.                                                                                                                                                                                                                                                                                                                                                                                                                                                                                                                                                                                                                                                                                                                                                                                                                                                                                                                                                                                                                                                                                                                                   |  |
| EPI_ISL_2382031                                                                                                                                                                                                                                                                                                                                                                                                                                                                                                                                                                                                                                                                                                                                                                                                                                                                                                                                                                                                                                                                                                                                                                                                                                                                                         | Universit t Innsbruck, Institut f r Mikrobiologie                          | Berghthaler laboratory, CeMM Research Center for Molecular Medicine of the Austrian Academy of Sciences                    | Andreas Berghthaler; Anna Schedl; Bekir Erguner; Benedikt Agerer; Christoph Bock; Fabian Amman; Jan Laine; Lukas Endler; Maelle Le Moing; Martin Senekowitsch; Michael Schuster; Petr Triska; Thomas Penz                                                                                                                                                                                                                                                                                                                                                                                                                                                                                                                                                                                                                                                                                                                                                                                                                                                                                                                                                                                                                                                                                                                                                                                                                                                                                                                                                                                              |  |

|                                                                                                                                                                                                                                                                                                                                                                                   |                                                                                          |                                                                                                                                                                                                                                 |                                                                                                                                                                                                                                                                                                                                                                                                                                                                                                                                                                                                                                                                                                                                                                                                                     |                                                                            |
|-----------------------------------------------------------------------------------------------------------------------------------------------------------------------------------------------------------------------------------------------------------------------------------------------------------------------------------------------------------------------------------|------------------------------------------------------------------------------------------|---------------------------------------------------------------------------------------------------------------------------------------------------------------------------------------------------------------------------------|---------------------------------------------------------------------------------------------------------------------------------------------------------------------------------------------------------------------------------------------------------------------------------------------------------------------------------------------------------------------------------------------------------------------------------------------------------------------------------------------------------------------------------------------------------------------------------------------------------------------------------------------------------------------------------------------------------------------------------------------------------------------------------------------------------------------|----------------------------------------------------------------------------|
| EPI_ISL_738358, EPI_ISL_2279989, EPI_ISL_2284693, EPI_ISL_2290872, EPI_ISL_2291743, EPI_ISL_2291745, EPI_ISL_2291749, EPI_ISL_2291802, EPI_ISL_2292170, EPI_ISL_2292414, EPI_ISL_2292490, EPI_ISL_2292612, EPI_ISL_2292738, EPI_ISL_2292941, EPI_ISL_2292972, EPI_ISL_2458375, EPI_ISL_2458500, EPI_ISL_2496656, EPI_ISL_2679564                                                  | see above                                                                                | Utah Public Health Laboratory                                                                                                                                                                                                   | Utah Public Health Laboratory                                                                                                                                                                                                                                                                                                                                                                                                                                                                                                                                                                                                                                                                                                                                                                                       | Erin L. Young; Erin Young; Kelly F. Oakeson; Kelly Oakeson; Tara Gallagher |
| EPI_ISL_2384224, EPI_ISL_2384227, EPI_ISL_2384231, EPI_ISL_2452023, EPI_ISL_2452025                                                                                                                                                                                                                                                                                               | VI-US Virgin Islands Department of Health                                                | Centers for Disease Control and Prevention Division of Viral Diseases, Pathogen Discovery                                                                                                                                       | Alison Laufer Halpin; Ben L. Rambo-Martin; Clinton R. Paden; Dakota Howard; Darlene Wagner; Dave Wentworth; Dhwani Batra; Jasmine Padilla; Justin Lee; Katie Dillon; Krista Queen; Kristen Knipe; Kristine Lacey; Mark Burroughs; Matthew Schmerer; Mili Sheth; Peter Cook; Sam Shepard; Sarah Nobles; Shoshona Le; Suxiang Tong; Vivien Dugan; Yvette Unoarumhi                                                                                                                                                                                                                                                                                                                                                                                                                                                    |                                                                            |
| EPI_ISL_452138                                                                                                                                                                                                                                                                                                                                                                    | VI-US Virgin Islands Department of Health                                                | Pathogen Discovery, Respiratory Viruses Branch, Division of Viral Diseases, Centers for Disease Control and Prevention                                                                                                          | Anna Montmayeur; Anna Uehara; Bettina Bankamp; Clinton R. Paden; Haibin Wang; Jing Zhang; Krista Queen; Rachel Marine; Suxiang Tong; Yan Li; Ying Tao; Zachary Weiner                                                                                                                                                                                                                                                                                                                                                                                                                                                                                                                                                                                                                                               |                                                                            |
| EPI_ISL_2090613, EPI_ISL_2090614                                                                                                                                                                                                                                                                                                                                                  | VIROLOGY, AFRIMS                                                                         | VIROLOGY, AFRIMS                                                                                                                                                                                                                | A.T.; Chinnawirotpisan, P.; Chua; Claire Navarro, F.; Corazon Diones, P.; D. Jr.; Fernandez, S.; H. Jr.; Huang; J.M.; Jones, A.; Joonlasak, K.; Klungthong, C.; M.T.; Manasatienkij, W.; Tabinas; V. II; Valderama; Velasco; Villa                                                                                                                                                                                                                                                                                                                                                                                                                                                                                                                                                                                  |                                                                            |
| EPI_ISL_1824682, EPI_ISL_1824683, EPI_ISL_1824684                                                                                                                                                                                                                                                                                                                                 | VITHAS Lab                                                                               | Microbiology Department, Complexo Hospitalario Universitario de Vigo                                                                                                                                                            | Camacho AT; Perez S; Requeiro B                                                                                                                                                                                                                                                                                                                                                                                                                                                                                                                                                                                                                                                                                                                                                                                     |                                                                            |
| EPI_ISL_2404806, EPI_ISL_2404815                                                                                                                                                                                                                                                                                                                                                  | VMC                                                                                      | Santa Clara County public Health Laboratory                                                                                                                                                                                     | Santa Clara County Public Health Department                                                                                                                                                                                                                                                                                                                                                                                                                                                                                                                                                                                                                                                                                                                                                                         |                                                                            |
| EPI_ISL_903635, EPI_ISL_903657                                                                                                                                                                                                                                                                                                                                                    | VT Dept. of Health Laboratory                                                            | Genomics and Discovery, Respiratory Viruses Branch, Division of Viral Diseases, Centers for Disease Control and Prevention                                                                                                      | Anna Montmayeur; Anna Uehara; Ben L. Rambo-Martin; Clinton R. Paden; Dhwani Batra; Haibin Wang; Jasmine Padilla; Jing Zhang; Justin Lee; Krista Queen; Lori Rowe; Mark Burroughs; Mili Sheth; Peter W. Cook; Rachel Marine; Sarah Nobles; Suxiang Tong; Yan Li; Ying Tao                                                                                                                                                                                                                                                                                                                                                                                                                                                                                                                                            |                                                                            |
| EPI_ISL_2333568                                                                                                                                                                                                                                                                                                                                                                   | Vestfold Hospital, Toensberg Department of Microbiology                                  | Norwegian Institute of Public Health, Department of Virology                                                                                                                                                                    | *Kathrine Stene-Johansen; Atiya R Ali; Debech Nadia; Engebretsen Serina Beate; Garcia Llorente Ignacio; Hilde Elshaug; Hilde Vollan; Jon Bråte; Kamilla Heddeland Instefjord; Karoline Bragstad; Line Victoria Moen; Marie Paulsen Madsen; Olav Hungnes; Pedersen Benedikte Nevjen; Rasmus Riis Kopperud                                                                                                                                                                                                                                                                                                                                                                                                                                                                                                            |                                                                            |
| EPI_ISL_833511                                                                                                                                                                                                                                                                                                                                                                    | Veterinary Specialized Instute "Nis"                                                     | Veterinary Specialized Institute "Kraljevo", Serbia                                                                                                                                                                             | Afonso, C.; Banovic Djeri, B.; Jankovic, M.; Jovanovic, T.; Knezevic, A.; Manic, M.; Petrovic, M.; Petrovic, T.; Sekler, M.; Tesovic, B.; Vidanovic, D.; Volkening, J.                                                                                                                                                                                                                                                                                                                                                                                                                                                                                                                                                                                                                                              |                                                                            |
| EPI_ISL_2227287                                                                                                                                                                                                                                                                                                                                                                   | Veterinary institute in Zvolen, Pod Drahami 918, 960 86 Zvolen Slovakia                  | Veterinary institute in Zvolen, Pod Drahami 918, 960 86 Zvolen Slovakia                                                                                                                                                         | Dirbáková Z.; Mojiš M.; Mokryšová S.; Sujová S.; Tinák M.                                                                                                                                                                                                                                                                                                                                                                                                                                                                                                                                                                                                                                                                                                                                                           |                                                                            |
| EPI_ISL_1658609, EPI_ISL_1658683, EPI_ISL_1914236, EPI_ISL_1914237, EPI_ISL_1914238, EPI_ISL_1914239                                                                                                                                                                                                                                                                              | Viollier AG                                                                              | Department of Biosystems Science and Engineering, ETH Zurich                                                                                                                                                                    | Andrea Patrignani; Andrea Cabral de Gouvea; Catharine Aquino; Chaoran Chen; Christian Beisel; Christiane Beckmann; Christoph Noppen; David Dreifuss; Deborah Penet; Doris Popovic; Elodie Burcklen; Emmanouil Dermitzakis; Griffin White; Henri Pegeot; Ina Nissen; Ioannis Xenarios; Ivan Topolsky; Jay Tracy; Katharina Jahn; Keith Harshman; Lara Fuhrmann; Laura Neff; Lennart Opitz; Lorenzo Cerutti; Maria Domenica Moccia; Maurice Redondo; Mirjam Feldkamp; Natascha Santacroce; Niko Beerenwinkel; Noemie Santamaria de Souza; Olivier Kobel; Philipp Jablonski; Ralph Schlapbach; Rebecca Denes; Sarah Nadeau; Simon Gruter; Sophie Seidel; Tanja Stadler; Timothy Sykes                                                                                                                                  |                                                                            |
| EPI_ISL_483654, EPI_ISL_486505, EPI_ISL_728915, EPI_ISL_900047, EPI_ISL_1120044, EPI_ISL_1259693, EPI_ISL_1598642, EPI_ISL_1750690, EPI_ISL_2017208, EPI_ISL_2017223, EPI_ISL_2017224, EPI_ISL_2017225, EPI_ISL_2018995, EPI_ISL_2019465, EPI_ISL_2019535, EPI_ISL_2212778, EPI_ISL_2307500, EPI_ISL_2307730, EPI_ISL_2308061, EPI_ISL_2375070, EPI_ISL_2462613, EPI_ISL_2662435, | see above                                                                                | Department of Biosystems Science and Engineering, ETH Zurich                                                                                                                                                                    | Andrea Patrignani; Andrea Patrizia Salzmann; Andrea Cabral de Gouvea; Catharine Aquino; Chaoran Chen; Christian Beisel; Christiane Beckmann; Christoph Noppen; Daniel Ehrsam; David Dreifuss; Deborah Penet; Doris Popovic; Elodie Burcklen; Emmanouil Dermitzakis; Griffin White; Henri Pegeot; Henriette Kurth; Ina Nissen; Ioannis Xenarios; Isabel Stürmer; Ivan Topolsky; Jay Tracy; Katharina Jahn; Keith Harshman; Lara Fuhrmann; Laura Neff; Lennart Opitz; Lorenzo Cerutti; Maria Domenica Moccia; Maurice Redondo; Mirjam Feldkamp; Natascha Santacroce; Niko Beerenwinkel; Noemie Santamaria de Souza; Olivier Kobel; Pedro Ferreira; Philipp Jablonski; Ralph Schlapbach; Rebecca Denes; Sarah Nadeau; Simon Grütter; Sophie Seidel; Susana Posada-Céspedes; Tanja Stadler; Timothy Sykes; Tobias Schär |                                                                            |
| EPI_ISL_2017850, EPI_ISL_2100241, EPI_ISL_2100242                                                                                                                                                                                                                                                                                                                                 | Viral Respiratory Infections Laboratory, Cantacuzino National Military-Medical Institute | Cantacuzino Institute Virology                                                                                                                                                                                                  | Carmen Cherciu; Catalina Pascu; Luiza Ustea; Mihaela Lazar; Mihaela Oprea; Nicoleta Paraschiv; Sorin Dinu                                                                                                                                                                                                                                                                                                                                                                                                                                                                                                                                                                                                                                                                                                           |                                                                            |
| EPI_ISL_452815, EPI_ISL_526906                                                                                                                                                                                                                                                                                                                                                    | Virginia DCLS                                                                            | Virginia DCLS                                                                                                                                                                                                                   | Virginia DCLS                                                                                                                                                                                                                                                                                                                                                                                                                                                                                                                                                                                                                                                                                                                                                                                                       |                                                                            |
| EPI_ISL_1805678, EPI_ISL_2003700, EPI_ISL_2081439, EPI_ISL_2603363                                                                                                                                                                                                                                                                                                                | Virginia Division of Consolidated Laboratory Services                                    | Virginia Division of Consolidated Laboratory Services                                                                                                                                                                           | Virginia DCLS                                                                                                                                                                                                                                                                                                                                                                                                                                                                                                                                                                                                                                                                                                                                                                                                       |                                                                            |
| EPI_ISL_2532755, EPI_ISL_2549198, EPI_ISL_2549199                                                                                                                                                                                                                                                                                                                                 | Virology Department, Central Health Laboratory                                           | The Francis Crick Institute                                                                                                                                                                                                     | Bahadoor BS; Crawford M; Daniels RS; Goldstone R; Harvey R; Manraj SS; Nicod J; Patel H; Ramuth M; Sonoo J                                                                                                                                                                                                                                                                                                                                                                                                                                                                                                                                                                                                                                                                                                          |                                                                            |
| EPI_ISL_1974856, EPI_ISL_2125642, EPI_ISL_2125659, EPI_ISL_2125661, EPI_ISL_2125662, EPI_ISL_2125711, EPI_ISL_2125713, EPI_ISL_2125715, EPI_ISL_2125717                                                                                                                                                                                                                           | see above                                                                                | COVID-19 Genomics UK (COG-UK) Consortium                                                                                                                                                                                        | Colquhoun R; Cotton S; Dewar R; Gallagher A; Hill V; Jackson B; Maloney D; McCrone JT; McHugh M; O'Toole Á; Rambaut A; Rooke S; Scher E; Templeton K; Yu X                                                                                                                                                                                                                                                                                                                                                                                                                                                                                                                                                                                                                                                          |                                                                            |
| EPI_ISL_1827666, EPI_ISL_1827667, EPI_ISL_1827670, EPI_ISL_1827678, EPI_ISL_1827689                                                                                                                                                                                                                                                                                               | Virology Department, Victoria Hospital, Plaine-Wilhems, Mauritius                        | National Institute for Communicable Diseases of the National Health Laboratory Service                                                                                                                                          | Allam M; Amoako DG; Baboo SB; Bhiman JN; Ismail A; Mahlangu B; Manraj SS; Mohale T; Ntuli N; Ramuth M; Sonoo J                                                                                                                                                                                                                                                                                                                                                                                                                                                                                                                                                                                                                                                                                                      |                                                                            |
| EPI_ISL_2547367                                                                                                                                                                                                                                                                                                                                                                   | Vredendal North Clinic wc VDN                                                            | National Health Laboratory Service/University of Cape Town (NHLS/UCT)                                                                                                                                                           | Arash Iranzadeh; Bruna Galvao; Carolyn Williamson; Deelan Doolabh; Diana Hardie; Gert Marais; Innocent Mudau; Lynn Tyers; Marvin Hsiao; Stephen Korsman                                                                                                                                                                                                                                                                                                                                                                                                                                                                                                                                                                                                                                                             |                                                                            |
| EPI_ISL_1789541, EPI_ISL_1789542, EPI_ISL_2385074, EPI_ISL_2385092, EPI_ISL_2385108, EPI_ISL_2385128, EPI_ISL_2385152, EPI_ISL_2450489, EPI_ISL_2523507, EPI_ISL_2523522, EPI_ISL_2523525, EPI_ISL_2523543                                                                                                                                                                        | see above                                                                                | WHO National Influenza Centre Russian Federation                                                                                                                                                                                | Alexey Masharsky; Andrey Komissarov; Artem Fadeev; Daria Danilenko; Dmitry Lioznov; Elena Nabieva; Georgii Bazykin; Kirill Varchenko; Ksenia Safina; Kseniya Komissarova; Maria Baturova; Maria Pisareva; Maria Timofeeva; Mikhail Bakaev; Nikita Yolshin; Oula Mansour; Oula Masour; Tamila Musaeva; Veronika Eder                                                                                                                                                                                                                                                                                                                                                                                                                                                                                                 |                                                                            |
| EPI_ISL_1273790                                                                                                                                                                                                                                                                                                                                                                   | WSSE Gdańsk                                                                              | 1. National Institute of Public Health - National Institute of Hygiene; 2. Eurofins Genomics Europe Sequencing GmbH                                                                                                             | ECDC COVID-19 WGS support team; Eurofins Genomics Europe Sequencing Team; Gierczyński Rafał; Sadkowska-Todys Małgorzata; Wolkowicz Tomasz; Zacharczuk Katarzyna                                                                                                                                                                                                                                                                                                                                                                                                                                                                                                                                                                                                                                                     |                                                                            |
| EPI_ISL_1909092, EPI_ISL_1909093, EPI_ISL_1909094, EPI_ISL_1909095                                                                                                                                                                                                                                                                                                                | WSSE Katowice                                                                            | 1. Academic Center for Pathomorphological and Genetic-Molecular Diagnostics Ltd, Białystok, Poland 2. National Institute of Public Health - National Institute of Hygiene, Warsaw, Poland                                       | Anetta Sulewska; Jacek Nikiłski; Janusz Dzieciol; Joanna Kiśluk; Katarzyna Zacharczuk; Konrad Raczkowski; Magdalena Nowakowska; Małgorzata Sadkowska-Todys; Piotr Karabowicz; Piotr Majewski; Przemysław Biełek. Joanna Reszeć; Radosław Charkiewicz; Tomasz Wolkowicz                                                                                                                                                                                                                                                                                                                                                                                                                                                                                                                                              |                                                                            |
| EPI_ISL_2105608                                                                                                                                                                                                                                                                                                                                                                   | WSSE w Gdansk                                                                            | 1. Academic Center for Pathomorphological and Genetic-Molecular Diagnostics Ltd, Białystok, Poland 2. National Institute of Public Health - National Institute of Hygiene, Warsaw, Poland                                       | Anetta Sulewska; Jacek Nikiłski; Janusz Dzieciol; Joanna Kiśluk; Katarzyna Zacharczuk; Konrad Raczkowski; Magdalena Nowakowska; Małgorzata Sadkowska-Todys; Piotr Karabowicz; Piotr Majewski; Przemysław Biełek. Joanna Reszeć; Radosław Charkiewicz; Tomasz Wolkowicz                                                                                                                                                                                                                                                                                                                                                                                                                                                                                                                                              |                                                                            |
| EPI_ISL_1908335                                                                                                                                                                                                                                                                                                                                                                   | WSSE w Krakowie                                                                          | 83. National Institute of Public Health - National Institute of Hygiene, Warsaw, Poland 2. Biobank Lab, University of Lodz 3. Laboratory of Respiratory Viruses, Teaching and Clinical Center of the Medical University of Lodz | Dominik Strapagiel; Izabela Drózd; Jakub Lach; Katarzyna Zacharczuk; Klaudyna Królikowska; Maciej Borowiec; Magdalena Nowakowska; Magdalena Traczyk-Borszyńska; Marcin Słomka; Marta Sobalska-Kwapis; Małgorzata Sadkowska-Todys; Tomasz Płoszaj; Tomasz Wolkowicz                                                                                                                                                                                                                                                                                                                                                                                                                                                                                                                                                  |                                                                            |
| EPI_ISL_2090620, EPI_ISL_2090621, EPI_ISL_2090622, EPI_ISL_2090623, EPI_ISL_2094439, EPI_ISL_2094440, EPI_ISL_2094441                                                                                                                                                                                                                                                             | see above                                                                                | National Institute of Public Health - National Institute of Hygiene                                                                                                                                                             | Gierczyński Rafał; Sadkowska-Todys Małgorzata; Wolkowicz Tomasz; Zacharczuk Katarzyna                                                                                                                                                                                                                                                                                                                                                                                                                                                                                                                                                                                                                                                                                                                               |                                                                            |
| EPI_ISL_2195442                                                                                                                                                                                                                                                                                                                                                                   | WVU Rapid Development Lab                                                                | WVU and Marshall University Combined Genomics Core Facilities                                                                                                                                                                   | James Denvir; Peter Perrotta; Peter Stoilov; Ryan Percifield; Wesley Kimble                                                                                                                                                                                                                                                                                                                                                                                                                                                                                                                                                                                                                                                                                                                                         |                                                                            |
| EPI_ISL_1446420, EPI_ISL_1824013                                                                                                                                                                                                                                                                                                                                                  | WY Public Health Laboratory                                                              | Centers for Disease Control and Prevention Division of Viral Diseases, Pathogen Discovery                                                                                                                                       | Alison Laufer Halpin; Ben L. Rambo-Martin; Clinton R. Paden; Dakota Howard; Darlene Wagner; Dave Wentworth; Dhwani Batra; Jasmine Padilla; Justin Lee; Katie Dillon; Krista Queen; Kristen Knipe; Kristine Lacey; Mark Burroughs; Matthew Schmerer; Mili Sheth; Peter Cook; Sam Shepard; Sarah Nobles; Shoshona Le; Suxiang Tong; Vivien Dugan; Yvette Unoarumhi                                                                                                                                                                                                                                                                                                                                                                                                                                                    |                                                                            |
| EPI_ISL_734400                                                                                                                                                                                                                                                                                                                                                                    | Wadsworth Center, New York State Department of Health                                    | Wadsworth Center, New York State Department of Health                                                                                                                                                                           | Alexis Russel; Daryl M. Lamson; Erasmus Schneider; Erica Lasek-Nesselquist; John Kelly; Jonathan Piltnick; Kirsten St. George; Navjot Singh; Sara Griesemer                                                                                                                                                                                                                                                                                                                                                                                                                                                                                                                                                                                                                                                         |                                                                            |
| EPI_ISL_536791, EPI_ISL_649124, EPI_ISL_707794                                                                                                                                                                                                                                                                                                                                    | Waikato Hospital                                                                         | Institute of Environmental Science and Research (ESR)                                                                                                                                                                           | Anja Werno; Antje van der Linden; Arlo Upton; Chris Mansell; David Hammer; Dragana Drinkovic; Erasmus Smit; Gary McAuliffe; Hana Sofia Andersson; Hermes Perez; James Ussher; Jill Sherwood; Jing Wang; Joep de Lig; Josh Freeman; Julia Howard; Juliet Elvy; Lauren Jelly; Mary DeAlmeida; Matt Blakiston; Matt Storey; Matthew Rogers; Max Bloomfield; Michael Addidle; Michelle Balm; Muhammad Faisal; Nikki Freed; Olin Silander; Sally Roberts; Sarah Jefferies; Sharmini Muttaiyah; Susan Morpeth; Susan Taylor; Timothy Blackmore; Vani Sathyendran; Veronica Playle; Virginia Hope; Xiaoyun Ren                                                                                                                                                                                                             |                                                                            |
| EPI_ISL_474054                                                                                                                                                                                                                                                                                                                                                                    | Wales Specialist Virology Centre Sequencing lab: Pathogen Genomics Unit                  | COVID-19 Genomics UK (COG-UK) Consortium                                                                                                                                                                                        | Alec Birchley; Alexander Adams; Amy Gaskin; Angela Marchbank; Bree Gatica-Wilcox; Catherine Moore; Jason Coombes; Joanne Watkins; Joel Southgate; Johnathan Evans; Laura Gifford; Lauren Gilbert; Lee Graham; Malorie Perry; Matthew Bull; Nicole Pacchiarini; Sally Corden; Sara Kumziene-Summerhayes; Sara Rey; Sarah Taylor; Simon Cottrell; Sophie Jones; Tom Connor                                                                                                                                                                                                                                                                                                                                                                                                                                            |                                                                            |
| EPI_ISL_1833202, EPI_ISL_2520676, EPI_ISL_2520706                                                                                                                                                                                                                                                                                                                                 | Wales Specialist Virology Centre Sequencing lab: Pathogen Genomics Unit                  | Public Health Wales Microbiology Cardiff Wales Specialist Virology Centre                                                                                                                                                       | Alec Birchley; Alexander Adams; Amy Gaskin; Angela Marchbank; Bree Gatica-Wilcox; Catherine Moore; Jason Coombes; Joanne Watkins; Joel Southgate; Johnathan Evans; Laura Gifford; Lauren Gilbert; Lee Graham; Malorie Perry; Matthew Bull; Nicole Pacchiarini; Sally Corden; Sara Kumziene-Summerhayes; Sara Rey; Sarah Taylor; Simon Cottrell; Sophie Jones; Tom Connor                                                                                                                                                                                                                                                                                                                                                                                                                                            |                                                                            |
| EPI_ISL_2096118                                                                                                                                                                                                                                                                                                                                                                   | Washington State Department of Health Public Health Laboratories                         | Washington State Department of Health Public Health Laboratories                                                                                                                                                                | Avi Singh; Darren Lucas; Denny Russell; Drew MacKellar; Geoff Melly; Hannah Gray; Joenice Gonzalez; JohnAric Peterson; Philip Dykema; Rebecca Cao; Vanessa De Los Santos                                                                                                                                                                                                                                                                                                                                                                                                                                                                                                                                                                                                                                            |                                                                            |

|                                                                                                                                                         |                                                                                                                    |                                                                                                                                                  |                                                                                                                                                                                                                                                                                                                                                                                                                                                                                                                                                                                                                                                           |
|---------------------------------------------------------------------------------------------------------------------------------------------------------|--------------------------------------------------------------------------------------------------------------------|--------------------------------------------------------------------------------------------------------------------------------------------------|-----------------------------------------------------------------------------------------------------------------------------------------------------------------------------------------------------------------------------------------------------------------------------------------------------------------------------------------------------------------------------------------------------------------------------------------------------------------------------------------------------------------------------------------------------------------------------------------------------------------------------------------------------------|
| EPI_ISL_413455<br>EPI_ISL_476021,<br>EPI_ISL_493071                                                                                                     | Washington State Public Health Lab<br>Washington University in St. Louis                                           | University of Washington Virology Lab<br>Washington University in St. Louis                                                                      | Alexander Greninger; Arun Nalla; Hong Xie; Keith Jerome; Pavitra Roychoudhury<br>Carey-Ann Burnham; David Wang; Lindsay Droit; Scott Handley; Stephen Tahan                                                                                                                                                                                                                                                                                                                                                                                                                                                                                               |
| EPI_ISL_2031771<br>EPI_ISL_416539                                                                                                                       | Weill Cornell Medicine<br>Wellington Hospital                                                                      | New York Genome Center<br>Institute of Environmental Science and Research (ESR)                                                                  | Andre Corvelo; Arryn Craney; Chris Mason; Dayna M. Oswald; Hanna Rennett; Lars F Westblade; Margaret Elizabeth Ross; Melissa Cushing; Michael Zody; Olivier Elemento; Priya Velu; Samantha Fennessey; Tom Maniatis<br>Craig Thornley; Erasmus Smit; Joep de Lig; Lauren Jelly; Matt Storey; Maxim Bloomfield; Xiaoyun Ren                                                                                                                                                                                                                                                                                                                                 |
| EPI_ISL_649125,<br>EPI_ISL_1016878,<br>EPI_ISL_1250695                                                                                                  | Wellington SCL (WN)                                                                                                | Institute of Environmental Science and Research (ESR)                                                                                            | Anja Werno; Antje van der Linden; Arlo Upton; Chris Mansell; David Hammer; Dragana Drinkovic; Erasmus Smit; Gary McAuliffe; Hana Sofia Andersson; Hermes Perez; James Ussher; Jill Sherwood; Jing Wang; Joep de Lig; Josh Freeman; Julia Howard; Juliet Elvy; Lauren Jelly; Mary DeAlmeida; Matt Blakiston; Matt Storey; Matthew Rogers; Max Bloomfield; Michael Addidle; Michelle Balm; Muhammad Faisal; Nikki Freed; Olin Silander; Olivia Stroeven; Rachel Boyle; Sally Roberts; SallyAnn Harbison; Sarah Jefferies; Sharmini Muttaiyah; Susan Morpeth; Susan Taylor; Timothy Blackmore; Vani Sathyendran; Veronica Playle; Virginia Hope; Xiaoyun Ren |
| EPI_ISL_451366                                                                                                                                          | West China Hospital of Sichuan University                                                                          | State Key Laboratory of Biotherapy of Sichuan University                                                                                         | Baowen Du; Binwu Ying; Chao Tang; Chuan Chen; Hancheng Wei; Jia Geng; Jing-wen Lin; Lu Chen; Mingxia Yu; Minjin Wang; Weimin Li; Yongzhao Zhou                                                                                                                                                                                                                                                                                                                                                                                                                                                                                                            |
| EPI_ISL_2517255,<br>EPI_ISL_2722640,<br>EPI_ISL_2734310                                                                                                 | West of Scotland Specialist Virology Centre, NHSGGC / MRC-<br>University of Glasgow Centre for Virus Research      | COVID-19 Genomics UK (COG-UK) Consortium                                                                                                         | Alasdair MacLean; Alice Broos; Ana da Silva Filipe; Antonia Ho; Daniel Mair; David L. Robertson; Emma Thomson; Guy Mollett; Ioulia Tsatsani; James Shepherd; Jenna Nichols; Joseph Hughes; Kathy Li; Kathy Smollett; Kyriaki Nomikou; Lily Tong; Matthew Holden; Natasha Johnson; Rachel Blacow; Richard Orton; Rory Gunson; Sarah McDonald; Sharif Shaaban; Sreenu Vattipally; Stephen Carmichael                                                                                                                                                                                                                                                        |
| EPI_ISL_1760176, EPI_ISL_1760178, EPI_ISL_1760180, EPI_ISL_1805456, EPI_ISL_1922708, EPI_ISL_1940150, EPI_ISL_2497916, EPI_ISL_2534251, EPI_ISL_2627936 |                                                                                                                    |                                                                                                                                                  |                                                                                                                                                                                                                                                                                                                                                                                                                                                                                                                                                                                                                                                           |
| see above                                                                                                                                               | Wichita State University - Molecular Diagnostics Lab                                                               | Kansas Health and Environmental Lab                                                                                                              | Ben Olsen; Jonathan Barnell; Katherine Wiggins; Mike Grose; and Phil Adam                                                                                                                                                                                                                                                                                                                                                                                                                                                                                                                                                                                 |
| EPI_ISL_471201,<br>EPI_ISL_1794262,<br>EPI_ISL_1794299,<br>EPI_ISL_1794552,<br>EPI_ISL_2279192                                                          | Wisconsin State Laboratory of Hygiene Communicable<br>Disease Division                                             | Wisconsin State Laboratory of Hygiene Communicable<br>Disease Division                                                                           | Abigail C. Shockey; Alicia J. Mooney; Erika M. Hanson; Kelsey R. Florek; Richard Griesser; Sara Wagner; Tonya Danz                                                                                                                                                                                                                                                                                                                                                                                                                                                                                                                                        |
| EPI_ISL_2241381                                                                                                                                         | Wojewodzka Stacja Sanitarno-Epidemiologiczna w Olsztynie,<br>Laboratorium Badan Epidemiologiczno-Klinicznych       | Wojewodzka Stacja Sanitarno-Epidemiologiczna w Olsztynie,<br>Laboratorium Badan Epidemiologiczno-Klinicznych                                     | Aleksandra Kobiatko; Barbara Dolinska; Emilia Tarabasz; Ewa Liszewska; Marta Lukian; Monika Czerwinska; Patryk Bielecki; Paulina Rozycka; Sylwia Krzetowska; Tomasz Jakubczak                                                                                                                                                                                                                                                                                                                                                                                                                                                                             |
| EPI_ISL_2547364                                                                                                                                         | Worcester Hospital wc WOC                                                                                          | National Health Laboratory Service/University of Cape Town<br>(NHLS/UCT)                                                                         | Arash Iranzadeh; Bruna Galvao; Carolyn Williamson; Deelan Doolabh; Diana Hardie; Gert Marais; Innocent Mudau; Lynn Tyers; Marvin Hsiao; Stephen Korsman                                                                                                                                                                                                                                                                                                                                                                                                                                                                                                   |
| EPI_ISL_455376<br>EPI_ISL_462921,<br>EPI_ISL_614248                                                                                                     | Wuhan Chain Medical Labs (CMLabs)<br>Wyoming Public Health Laboratory                                              | State Key Laboratory of Biotherapy of Sichuan University<br>Center for Global Health, University of New Mexico Health<br>Sciences Center         | Baowen Du; Binwu Ying; Chao Tang; Chuan Chen; Hancheng Wei; Jia Geng; Jing-wen Lin; Lu Chen; Mingxia Yu; Minjin Wang; Weimin Li; Yongzhao Zhou<br>Cari Sloma; Darrell Dinwiddie; Daryl Domman; Kurt Schwalm; Noah Hull; Rob Christensen; Wanda Manley                                                                                                                                                                                                                                                                                                                                                                                                     |
| EPI_ISL_539796,<br>EPI_ISL_540921,<br>EPI_ISL_1503290,<br>EPI_ISL_1511254,<br>EPI_ISL_1919582,<br>EPI_ISL_2501965                                       | Wyoming Public Health Laboratory                                                                                   | Wyoming Public Health Laboratory                                                                                                                 | Ashley Norberg; Brian Dominguez; Cari Sloma; Channing Weber; Chayse Rowley; Elliot Thomasson; Jim Mildenberger; Joel Sevinsky; Lynette Gumbleton; Marley Goetz; Noah Hull; Rob Christensen; Robert Petit; Sam Britz; Taylor Fearing; Wanda Manley; and Rob Christensen; and Wanda Manley                                                                                                                                                                                                                                                                                                                                                                  |
| EPI_ISL_1225592<br>EPI_ISL_2035068                                                                                                                      | Yale Clinical Virology Lab<br>Yale Clinical Virology Lab                                                           | Grubaugh Lab - Yale School of Public Health<br>Yale Center for Genomic Analysis                                                                  | Anderson Brito; Annie Watkins; Chaney Kalinich; Chantal Vogels; Isabell Ott; Joseph Fauver; Mallery Breban; Marie L. Landry; Mary Petrone; Nathan Grubaugh; Tara Alpert<br>Brooke Sullivan; Curt Scharfe; Irina Tikhonova; Kaya Bilguvar; Shrikant Mane                                                                                                                                                                                                                                                                                                                                                                                                   |
| EPI_ISL_1595852,<br>EPI_ISL_1595853                                                                                                                     | Yunan Center for Disease Control and Prevention                                                                    | National Institute for Viral Disease Control and Prevention,<br>China CDC                                                                        | Jienan Zhou; Meiling Zhang; Senquan Jia; Xiang Zhao; Xiaoqing Fu; Yanan Feng; Yuchao Wu; Zhixiao Chen                                                                                                                                                                                                                                                                                                                                                                                                                                                                                                                                                     |
| EPI_ISL_1911195,<br>EPI_ISL_1911196,<br>EPI_ISL_1911197,<br>EPI_ISL_1911250                                                                             | Zhejiang Provincial Center for Disease Control and Prevention<br>Zhoushan Center for Disease Prevention and Contol | Zhejiang Province Center of Disease Control and prevention                                                                                       | Bing WU; Hongling Wang; Yanjun Zhang                                                                                                                                                                                                                                                                                                                                                                                                                                                                                                                                                                                                                      |
| EPI_ISL_468153                                                                                                                                          | [Romania, Bucharest] National Institute for Infectious<br>Diseases “Prof. Dr. Matei Balș”                          | [Romania, Bucharest] National Institute for Infectious<br>Diseases “Prof. Dr. Matei Balș”                                                        | Corina Casangiu; Leontina Banica; Marius Cotic; Marius Surleac; Simona Paraschiv                                                                                                                                                                                                                                                                                                                                                                                                                                                                                                                                                                          |
| EPI_ISL_447912                                                                                                                                          | n/a                                                                                                                | National Institute of Health. Department of medical Sciences,<br>Ministry of Public Health, Thailand                                             | Chittaganpitch; Malinee; Okada; Parmen; Phuygun; Pilailuk; Siripaporn; Sittiporn; Sunthareeya; Thanadachakul; Thanutsapa; Waicharoen; Warawan; Wongboot                                                                                                                                                                                                                                                                                                                                                                                                                                                                                                   |
| EPI_ISL_458286<br>EPI_ISL_463006                                                                                                                        | unknown<br>unknown                                                                                                 | Bundeswehr Institute of Microbiology<br>Clinical virology                                                                                        | Antwerpen; Bestehorn-Willmann; Eckstein, S.; Handrick, S.; M.C.; M.H.; M.S.; Najja, H.; R. and Ben Moussa, M.; Rehn, A.; Stoecker, K.; Walter; Woelfel                                                                                                                                                                                                                                                                                                                                                                                                                                                                                                    |
| EPI_ISL_1738871,<br>EPI_ISL_2248966,<br>EPI_ISL_2445733                                                                                                 | unknown                                                                                                            | Instituto Nacional de Saude (INSA)                                                                                                               | Fares, W.; Triki, H.<br>Borges et al                                                                                                                                                                                                                                                                                                                                                                                                                                                                                                                                                                                                                      |
| EPI_ISL_476559                                                                                                                                          | unknown                                                                                                            | Laboratoire Sciences et Technologies de la Santé (STS)<br>Institut Supérieur des Sciences de la Santé Université Hassan<br>1er, Settatt, Morocco | Abderraouf Hilali; Amal Souiri; Hajar Lemriss; Jawad Bouzid; Mustapha Mouallif; Narjis Amar; Sanaâ Lemriss; Saâd EL Kabbaj; Touria Essayagh                                                                                                                                                                                                                                                                                                                                                                                                                                                                                                               |
| EPI_ISL_483060<br>EPI_ISL_640073                                                                                                                        | unknown<br>unknown                                                                                                 | Microbiology, Canterbury Health Laboratories<br>NHLS/UCT                                                                                         | Anderson, T.; Dilcher, M.<br>Arash Iranzadeh; Bruna Galvao; Carolyn Williamson; Deelan Doolabh; Diana Hardie; Innocent Mudau; Kruger Marais; Lynn Tyers; Marvin Hsiao; Stephen Korsman                                                                                                                                                                                                                                                                                                                                                                                                                                                                    |
